# Supplementary material for: Palladium-catalyzed selective C–C bond cleavage of keto-vinylidenecyclopropanes: construction of structurally rich dihydrofurans and tetrahydrofurans
Source: Royal Society of Chemistry journal article supplement (doi:10.1039/d4sc02536a), 2024-01-01
Supplement: d4sc02536a1.pdf [file d4sc02536a1.pdf]

# Supporting Information

## Palladium-Catalyzed Selective C-C Bond Cleavage of Keto-Vinylidenecyclopropanes: Construction of Structurally Rich Dihydrofurans and Tetrahydrofurans

Chao Ning,<sup>[a]</sup> Ziqi Yu,<sup>[a]</sup> Min Shi<sup>\*,[a,b]</sup> and Yin Wei<sup>\*,[b]</sup>

<sup>a</sup> Key Laboratory for Advanced Materials and Institute of Fine Chemicals, Key Laboratory for Advanced Materials and Feringa Nobel Prize Scientist Joint Research Center, School of Chemistry & Molecular Engineering, East China University of Science and Technology, Meilong Road No.130, Shanghai, 200237 (China), <sup>b</sup> State Key Laboratory of Organometallic Chemistry, Center for Excellence in Molecular Synthesis, University of Chinese Academy of Sciences, Shanghai Institute of Organic Chemistry, Chinese Academy of Sciences, 345 Lingling Road, Shanghai 200032, P. R. China. mshi@mail.sioc.ac.cn, weiyin@sioc.ac.cn

### Table of Contents

|     |                                                                                              |      |
|-----|----------------------------------------------------------------------------------------------|------|
| 1.  | General remarks.....                                                                         | S2   |
| 2.  | General procedures for the synthesis of substrates <b>1</b> .....                            | S3   |
| 3.  | Optimization of reaction conditions .....                                                    | S7   |
| 4.  | General procedure for the synthesis of <b>2</b> , <b>3</b> , <b>4</b> and <b>12-14</b> ..... | S8   |
| 5.  | Asymmetric studies .....                                                                     | S10  |
| 6.  | Control experiment and the other proposed reaction mechanisms.....                           | S13  |
| 7.  | Gram scale reaction and synthetic transformations .....                                      | S18  |
| 8.  | Spectroscopic data of substrates <b>1</b> .....                                              | S22  |
| 9.  | Spectroscopic data of substrates <b>2-14</b> .....                                           | S63  |
| 10. | Computational studies.....                                                                   | S194 |
| 11. | X-Ray structures .....                                                                       | S254 |
| 12. | References .....                                                                             | S256 |

## 1. General remarks

$^1\text{H}$ ,  $^{13}\text{C}$  and  $^{19}\text{F}$  NMR spectra were recorded at 400 MHz or 600 MHz, 100 MHz or 150 MHz and 376 MHz, respectively. HRMS spectra were recorded by EI, ESI, FI method. Infrared spectra were recorded on a Perkin-Elmer PE-983 spectrometer with absorption in  $\text{cm}^{-1}$ . Mass spectra were recorded by EI, ESI, and HRMS was measured on an Agilent Technologies 6224 TOF LC/MS instrument and a Waters Micromass GCT Premier. Melting points were determined on a digital melting point apparatus and temperatures were uncorrected. X-ray structure was determined on a Bruker Smart-1000 X-ray Diffraction meter. The employed solvents were dried up by standard methods when necessary. Commercially obtained reagents were used without further purification. All reactions were monitored by TLC plate analysis with silica gel coated plates (Huanghai GF254). Flash column chromatography was performed by using 300-400 mesh silica gel eluting with ethyl acetate and petroleum ether at increased pressure. Chiral HPLC was performed on a SHIMADZU SPD-10A  $\nu\text{p}$  series with chiral columns (Chiralpak AD-H columns  $4.6 \times 250$  mm, (Daicel Chemical Ind., Ltd.)).

## 2. General procedures for the synthesis of substrates 1

Synthesis of substrates **1a-1q**, **1ad**, **1ae** and **1af**<sup>[1], [2], [3]</sup>

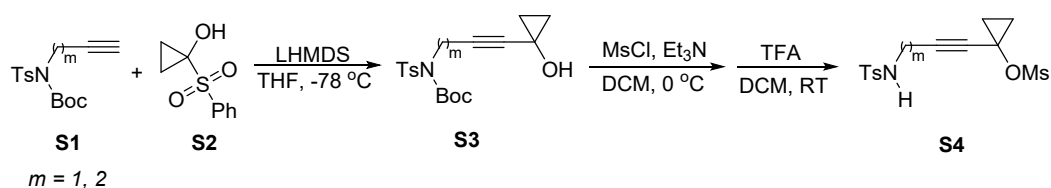

To the solution of compound **S1** (20 mmol) in THF (30 mL) was added LHMDS (22 mmol, 1.0 M in THF) within 20 min at  $-78\text{ }^\circ\text{C}$  under argon. The resulting solution was allowed to stir at  $-78\text{ }^\circ\text{C}$  for 0.5 h before a solution of **S2** (10 mmol) in THF (10 mL) was added into the above mixture. Consequently, the reaction mixture was allowed to warm up to room temperature and was stirred for 8 h. Then, saturated  $\text{NH}_4\text{Cl}$  solution was added to quench the reaction. Extracted with ethyl ether, dried over anhydrous  $\text{Na}_2\text{SO}_4$ , filtered, the organic phase was purified by a flash column chromatography on silica gel to give the corresponding product **S3** (PE/EA: 4:1~2:1).

Under argon atmosphere, compound **S3** (4.0 mmol) was dissolved in DCM (10.0 mL) at  $0\text{ }^\circ\text{C}$ ,  $\text{Et}_3\text{N}$  (8.0 mmol) and MsCl (6.0 mmol) was added. After stirring for 1 h, the reaction was quenched with  $\text{H}_2\text{O}$  (10.0 mL), extracted with DCM (10 mL x 3), and dried over anhydrous  $\text{Na}_2\text{SO}_4$ . The solvent was removed under reduced pressure and the residue was transferred into a 50 mL flask with 10 mL DCM. Then, trifluoroacetic acid (TFA, 40 mmol) was added dropwise. After stirring for 12 h, the reaction was quenched with saturated  $\text{Na}_2\text{CO}_3$  solution, extracted with DCM (10 mL x 3), and dried over anhydrous  $\text{Na}_2\text{SO}_4$ . The solvent was removed under reduced pressure and the residue was purified by a flash column chromatography ( $\text{SiO}_2$ ) to give the corresponding product **S4** (PE/EA: 4:1~1:1).

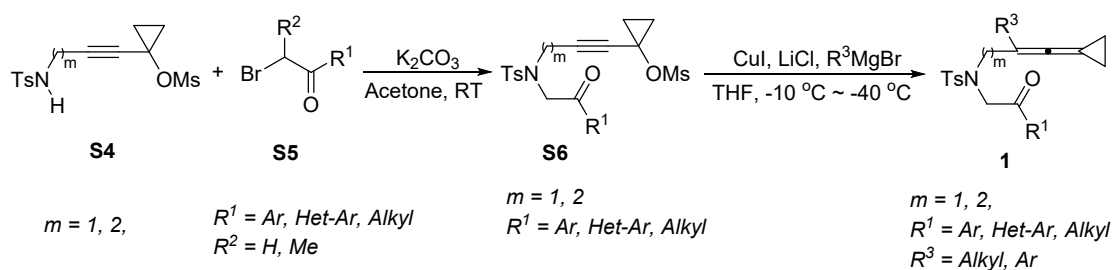

To the solution of **S4** (1.5 mmol) and  $K_2CO_3$  (1.8 mmol) in acetone (10 ml) was added **S5** (1.8 mmol). The resulting solution was allowed to stir at room temperature for 8 h. Then,  $H_2O$  was added to quench the reaction. The reaction mixture was extracted with EA twice, dried over anhydrous  $Na_2SO_4$ . The solvent was removed under reduced pressure and the residue was purified by a flash column chromatography ( $SiO_2$ ) to give the corresponding product **S6** for two steps (PE/EA: 4:1~2:1).

Under argon atmosphere,  $CuI$  (2.2 mmol) and  $LiCl$  (2.2 mmol) in a three-necked bottle was dried upon heating. Then THF (10 mL) was added. At  $-5\text{ }^\circ C$ ,  $R^3MgBr$  (1.0 mol/L in THF, 2.0 mmol, 2.0 mL) was added to the reaction. 10 minutes later, the flask was moved into a  $-40\text{ }^\circ C$  bath and stirred for a while before a solution of **S6** (1.0 mmol) in THF (10 mL) was added dropwise into the above flask. After stirring at  $-40\text{ }^\circ C$  for 8 h, the reaction was quenched with saturated  $NH_4Cl$  solution, extracted with EA (10 mL x 3), and dried over anhydrous  $Na_2SO_4$ . The solvent was removed under reduced pressure and the residue was purified by a flash column chromatography ( $SiO_2$ ) to give the corresponding product **1** (PE/EA: 10:1).

**Typical procedure for the preparation of compounds *O*-linked Keto-VDCPs **1ad** and  $CH_2$ -linked Keto-VDCPs **1ae**.**

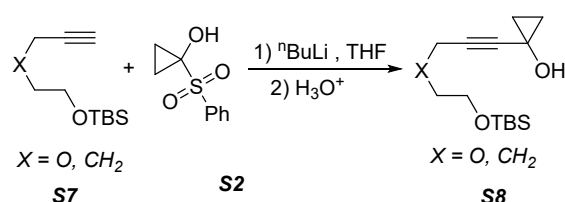

To the solution of compound **S7** (20 mmol) in THF (30 mL) was added LMHDS (21 mmol, 1.0 M in THF) within 20 min at  $-78\text{ }^\circ C$  under argon. The resulting solution was allowed to stir at  $-78\text{ }^\circ C$  for 0.5 h before a solution of **S2** (10 mmol) in THF (10 mL) was added into the above mixture. Consequently, the reaction mixture was allowed to warm up to room temperature and was stirred for 8 h. Then, saturated  $NH_4Cl$  solution was added to quench the reaction. Extracted with ethyl ether, dried over anhydrous  $Na_2SO_4$ , filtered, the organic phase was purified by a flash column chromatography on silica gel to give the corresponding product **S8** (PE/EA: 8:1~4:1).

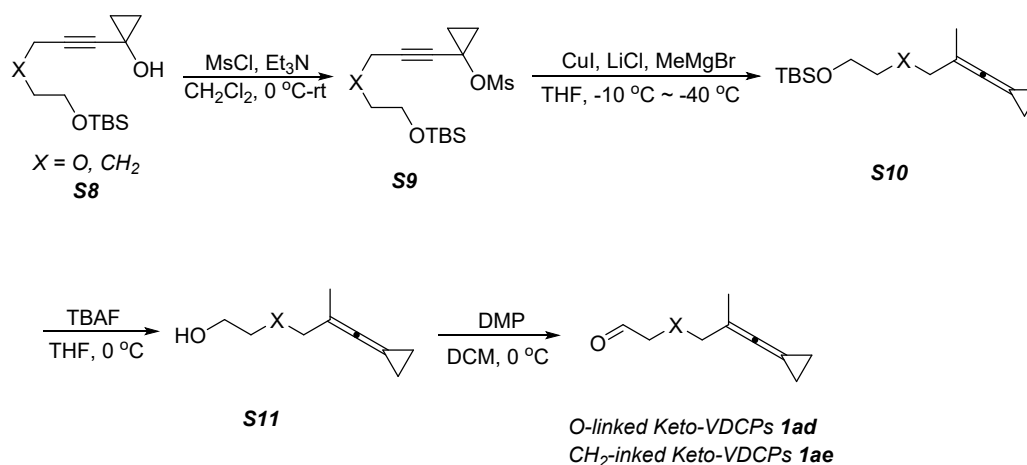

Under argon atmosphere, compound **S8** (4.0 mmol) was dissolved in DCM (10.0 mL) at 0 °C, Et<sub>3</sub>N (8.0 mmol) and MsCl (6.0 mmol) were added. After stirring for 1 h, the reaction was quenched with H<sub>2</sub>O (10.0 mL), extracted with DCM (10 mL x 3), and dried over anhydrous Na<sub>2</sub>SO<sub>4</sub>. The solvent was removed under reduced pressure and the residue was purified by a flash column chromatography (SiO<sub>2</sub>) to give the corresponding product **S9** (PE/EA: 10:1).

Under argon atmosphere, CuI (8.8 mmol) and LiCl (8.8 mmol) in a three-necked bottle was dried upon heating. Then THF (10 mL) was added. At -5 °C, MeMgBr (1.0 mol/L in THF, 8.0 mmol, 8.0 mL) was added to the reaction. 10 minutes later, the flask was moved into a -40 °C bath and stirred for a while before a solution of **S9** (4.0 mmol) in THF (10 mL) was added dropwise into the above flask. After stirring at -40 °C for 8 h, the reaction was quenched with saturated NH<sub>4</sub>Cl solution, extracted with EA (10 mL x 3), and dried over anhydrous Na<sub>2</sub>SO<sub>4</sub>. The solvent was removed under reduced pressure and the residue was purified by a flash column chromatography (SiO<sub>2</sub>) to give the corresponding product **S10** (PE/EA: 10:1).

Tetrabutylammonium fluoride (TBAF, 1.0 mol/L in THF, 6.0 mmol, 6.0 mL) was added dropwise into compound **S10** (4.0 mmol) was dissolved in THF (10.0 mL) at 0 °C. After stirring for 1 h, the reaction was quenched with saturated NaHCO<sub>3</sub> solution, extracted with DCM (10 mL x 3), and dried over anhydrous Na<sub>2</sub>SO<sub>4</sub>. The solvent was removed under reduced pressure and the residue was purified by a flash column chromatography (SiO<sub>2</sub>) to give the corresponding product **S11** (PE/EA: 4:1~1:1).

Then, **S11**, DMP and anhydrous DCM was added to the round bottom flask. After stirring for 1 h, the reaction was quenched with saturated NaHCO<sub>3</sub> solution and the organic phase was washed by

saturated  $\text{Na}_2\text{O}_3\text{S}_2$  solution. The solvent was removed under reduced pressure and the residue was purified by a flash column chromatography ( $\text{SiO}_2$ ) to give the corresponding *O*-linked Keto-VDCPs **1ad** and *CH*<sub>2</sub>-linked Keto-VDCP **1ae** (PE/EA: 4:1~1:1).

### 3. Optimization of the palladium-catalyzed 3+2 cycloaddition and tandem cyclization reactions of keto-vinylidenecyclopropanes **1** for products **2a**, **3a** and **4a**.

**Table S1.** Optimization of the palladium-catalyzed [3+2] cycloaddition and tandem cyclization reactions of keto-vinylidenecyclopropane **1a** for products **2a**, **3a** and **4a**

| Entry <sup>a</sup> | Catalyst                               | L                                               | Additive                         | Solvent        | T (°C)     | Yield/% <sup>b</sup> |           |              |
|--------------------|----------------------------------------|-------------------------------------------------|----------------------------------|----------------|------------|----------------------|-----------|--------------|
|                    |                                        |                                                 |                                  |                |            | <b>2a</b>            | <b>3a</b> | <b>4a</b>    |
| 1                  | Pd <sub>2</sub> (dba) <sub>3</sub>     | <sup>t</sup> BuXPhos                            | none                             | toluene        | 100        | 8                    | 46        | 26           |
| 2                  | Pd <sub>2</sub> (dba) <sub>3</sub>     | RuPhos                                          | none                             | toluene        | 100        | 6                    | 18        | 6            |
| 3                  | Pd <sub>2</sub> (dba) <sub>3</sub>     | dppf                                            | none                             | toluene        | 100        | -                    | -         | -            |
| 4                  | Pd <sub>2</sub> (dba) <sub>3</sub>     | dppb                                            | none                             | toluene        | 100        | -                    | -         | -            |
| 5                  | Pd <sub>2</sub> (dba) <sub>3</sub>     | (rac)-BINAP                                     | none                             | toluene        | 100        | -                    | -         | -            |
| 6 <sup>c</sup>     | Pd <sub>2</sub> (dba) <sub>3</sub>     | <sup>t</sup> BuXPhos                            | none                             | toluene        | 120        | 12                   | 60        | 10           |
| 7                  | Pd <sub>2</sub> (dba) <sub>3</sub>     | <sup>t</sup> BuXPhos                            | 20 mol% AgOTf                    | toluene        | 100        | -                    | 40        | 8            |
| 8                  | Pd <sub>2</sub> (dba) <sub>3</sub>     | <sup>t</sup> BuXPhos                            | 20 mol% AgSbF <sub>6</sub>       | toluene        | 100        | -                    | 32        | 8            |
| 9                  | Pd <sub>2</sub> (dba) <sub>3</sub>     | <sup>t</sup> BuXPhos                            | 20 mol% ZnI <sub>2</sub>         | toluene        | 100        | -                    | 60        | 10           |
| 10                 | Pd <sub>2</sub> (dba) <sub>3</sub>     | <sup>t</sup> BuXPhos                            | 20 mol% LiCl                     | toluene        | 100        | -                    | 74        | 10           |
| 11                 | Pd <sub>2</sub> (dba) <sub>3</sub>     | <sup>t</sup> BuXPhos                            | 10 mol% LiCl                     | toluene        | 100        | -                    | 62        | 12           |
| 12                 | Pd <sub>2</sub> (dba) <sub>3</sub>     | <sup>t</sup> BuXPhos                            | 100 mol% equiv ZnI <sub>2</sub>  | toluene        | 100        | -                    | 82        | 6            |
| 13                 | Pd <sub>2</sub> (dba) <sub>3</sub>     | <sup>t</sup> BuXPhos                            | 20 mol% ZnCl <sub>2</sub>        | toluene        | 100        | -                    | 90        | trace        |
| <b>14</b>          | <b>Pd<sub>2</sub>(dba)<sub>3</sub></b> | <b><sup>t</sup>BuXPhos</b>                      | <b>100 mol% ZnCl<sub>2</sub></b> | <b>toluene</b> | <b>100</b> | -                    | <b>92</b> | <b>trace</b> |
| 16                 | Pd <sub>2</sub> (dba) <sub>3</sub>     | <sup>t</sup> BuXPhos                            | 100 mol% ZnCl <sub>2</sub>       | dioxane        | 100        | -                    | 80        | 8            |
| 17                 | Pd <sub>2</sub> (dba) <sub>3</sub>     | <sup>t</sup> BuXPhos                            | 100 mol% ZnCl <sub>2</sub>       | DCE            | 100        | -                    | 80        | 12           |
| 18                 | Pd <sub>2</sub> (dba) <sub>3</sub>     | <sup>t</sup> BuXPhos                            | 100 mol% ZnCl <sub>2</sub>       | PhCl           | 100        | -                    | 40        | 8            |
| 19                 | Pd <sub>2</sub> (dba) <sub>3</sub>     | <sup>t</sup> BuXPhos                            | 100 mol% ZnCl <sub>2</sub>       | MeCN           | 100        | -                    | -         | -            |
| 20 <sup>d</sup>    | Pd <sub>2</sub> (dba) <sub>3</sub>     | HP <sup>t</sup> Bu <sub>3</sub> BF <sub>4</sub> | none                             | toluene        | 100        | 80                   | -         | 12           |
| 21 <sup>e</sup>    | Pd <sub>2</sub> (dba) <sub>3</sub>     | HP <sup>t</sup> Bu <sub>3</sub> BF <sub>4</sub> | none                             | toluene        | 100        | 6                    | -         | 82           |
| 22                 | <b>Pd<sub>2</sub>(dba)<sub>3</sub></b> | <b>dtbpf</b>                                    | <b>none</b>                      | <b>toluene</b> | <b>100</b> | <b>96</b>            | -         | -            |
| 23                 | Pd <sub>2</sub> (dba) <sub>3</sub>     | dtbpf                                           | none                             | toluene        | 90         | 72                   | -         | 6            |
| 24                 | Pd <sub>2</sub> (dba) <sub>3</sub>     | dtbpf                                           | none                             | toluene        | 120        | 86                   | -         | -            |
| 25                 | Pd <sub>2</sub> (dba) <sub>3</sub>     | dtbpf                                           | none                             | dioxane        | 100        | 80                   | -         | 10           |
| 26                 | Pd <sub>2</sub> (dba) <sub>3</sub>     | dtbpf                                           | none                             | DCE            | 100        | 82                   | -         | 12           |
| 27                 | Pd <sub>2</sub> (dba) <sub>3</sub>     | dtbpf                                           | none                             | PhCl           | 100        | 48                   | -         | 6            |
| 28                 | Pd <sub>2</sub> (dba) <sub>3</sub>     | dtbpf                                           | none                             | MeCN           | 100        | -                    | -         | -            |
| 26                 | Pd <sub>2</sub> (dba) <sub>3</sub>     | -                                               | none                             | toluene        | 100        | -                    | -         | -            |
| 27                 | -                                      | <sup>t</sup> BuXPhos                            | none                             | toluene        | 100        | -                    | -         | -            |
| 28                 | -                                      | dtbpf                                           | none                             | toluene        | 100        | -                    | -         | -            |

<sup>t</sup>BuXPhos

RuPhos

dppf

dppb

(rac)-BINAP

dtbpf

<sup>a</sup>Reaction condition: substrate **1a** (0.10 mmol), Pd<sub>2</sub>(dba)<sub>3</sub> (6 mol%) and L (12 mol%) in 1.0 mL anhydrous toluene under argon atmosphere for 8 h. <sup>b</sup>Isolated yield. <sup>c</sup>Pd<sub>2</sub>(dba)<sub>3</sub> (10 mol%), L (20 mol%) was added. <sup>d</sup>K<sub>2</sub>CO<sub>3</sub> (20 mol%) was added. <sup>e</sup>K<sub>2</sub>CO<sub>3</sub> (100 mol%) was added.

**4. General procedure for the palladium-catalyzed 3+2 cycloaddition and tandem cyclization reactions of keto-vinylidenecyclopropanes **1** for products **2**, **3**, **4** and **12-14**.**

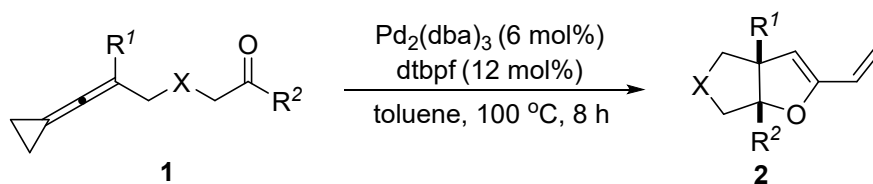

To a 10 mL dried tube was charged with keto-VDCPs **1** (0.1 mmol, 1.0 equiv), Pd<sub>2</sub>dba<sub>3</sub> (6 mol%) and dtbpf (12 mol%). The reaction tube was evacuated and backfilled with argon (repeated three times). Then, toluene (1.0 mL) was added into the tube. The reaction mixture was stirred at 100 °C for 8 h. The solvent was removed under reduced pressure and the residue was purified by a flash column chromatography (SiO<sub>2</sub>) to give the corresponding product **2**.

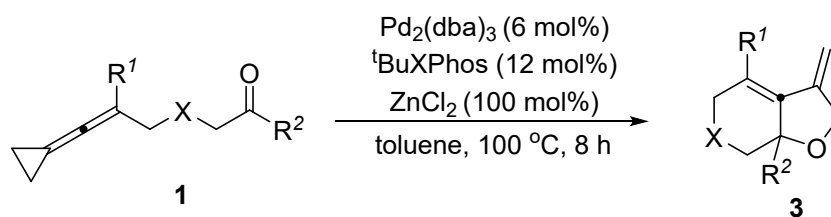

To a 10 mL dried tube was charged with keto-VDCPs **1** (0.1 mmol, 1.0 equiv), Pd<sub>2</sub>dba<sub>3</sub> (6 mol%), <sup>t</sup>BuXPhos (12 mol%) and ZnCl<sub>2</sub> (100 mol%). The reaction tube was evacuated and backfilled with argon (repeated three times). Then, toluene (1.0 mL) was added into the tube. The reaction mixture was stirred at 100 °C for 8 h. The solvent was removed under reduced pressure and the residue was purified by a flash column chromatography (SiO<sub>2</sub>) to give the corresponding product **3**.

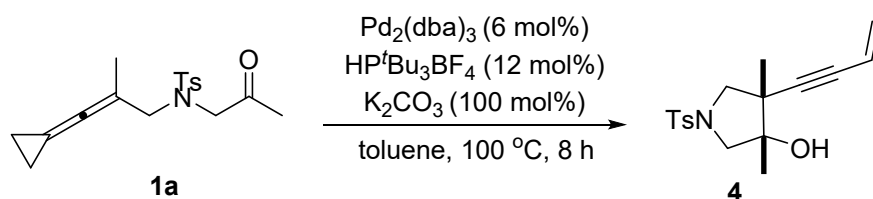





## 5. Asymmetric studies

**Table S2.** Studies of the enantioselective tandem cyclization reactions

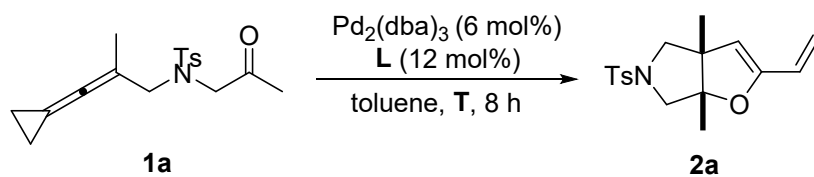

| Entry <sup>a</sup> | Catalyst                    | L          | T (°C) | Yield <sup>b</sup> (%) | ee <sup>c</sup> (%) |
|--------------------|-----------------------------|------------|--------|------------------------|---------------------|
| 1                  | $\text{Pd}_2(\text{dba})_3$ | <b>L1</b>  | 100    | -                      | -                   |
| 2                  | $\text{Pd}_2(\text{dba})_3$ | <b>L2</b>  | 100    | -                      | -                   |
| 3                  | $\text{Pd}_2(\text{dba})_3$ | <b>L3</b>  | 100    | 86                     | 15                  |
| 4                  | $\text{Pd}_2(\text{dba})_3$ | <b>L4</b>  | 100    | -                      | -                   |
| 5                  | $\text{Pd}_2(\text{dba})_3$ | <b>L5</b>  | 100    | 90                     | 0                   |
| 6                  | $\text{Pd}_2(\text{dba})_3$ | <b>L6</b>  | 100    | 82                     | 7                   |
| 7                  | $\text{Pd}_2(\text{dba})_3$ | <b>L7</b>  | 100    | -                      | -                   |
| 8                  | $\text{Pd}_2(\text{dba})_3$ | <b>L8</b>  | 100    | -                      | -                   |
| 9                  | $\text{Pd}_2(\text{dba})_3$ | <b>L3</b>  | 90     | -                      | -                   |
| 10                 | $\text{Pd}_2(\text{dba})_3$ | <b>L5</b>  | 90     | 56                     | 0                   |
| 11                 | $\text{Pd}_2(\text{dba})_3$ | <b>L6</b>  | 90     | -                      | -                   |
| 12                 | $\text{Pd}_2(\text{dba})_3$ | <b>L9</b>  | 90     | 34                     | 11                  |
| 13                 | $\text{Pd}_2(\text{dba})_3$ | <b>L10</b> | 90     | 32                     | 0                   |
| 14                 | $\text{Pd}_2(\text{dba})_3$ | <b>L11</b> | 90     | 66                     | 12                  |
| 15                 | $\text{Pd}_2(\text{dba})_3$ | <b>L12</b> | 90     | 42                     | 12                  |
| 16                 | $\text{Pd}_2(\text{dba})_3$ | <b>L13</b> | 90     | 52                     | 16                  |
| 17                 | $\text{Pd}_2(\text{dba})_3$ | <b>L14</b> | 90     | 62                     | 12                  |
| 18                 | $\text{Pd}_2(\text{dba})_3$ | <b>L15</b> | 90     | 40                     | 20                  |
| 19                 | $\text{Pd}_2(\text{dba})_3$ | <b>L16</b> | 90     | 80                     | 14                  |
| 20                 | $\text{Pd}_2(\text{dba})_3$ | <b>L17</b> | 90     | 42                     | 3                   |
| 21                 | $\text{Pd}_2(\text{dba})_3$ | <b>L18</b> | 90     | 30                     | 16                  |
| 22                 | $\text{Pd}_2(\text{dba})_3$ | <b>L19</b> | 90     | 60                     | 2                   |
| 23                 | $\text{Pd}_2(\text{dba})_3$ | <b>L20</b> | 90     | 40                     | 9                   |
| 24                 | $\text{Pd}_2(\text{dba})_3$ | <b>L21</b> | 90     | 34                     | 16                  |
| 25                 | $\text{Pd}_2(\text{dba})_3$ | <b>L22</b> | 90     | 15                     | 20                  |
| 26                 | $\text{Pd}_2(\text{dba})_3$ | <b>L23</b> | 90     | -                      | -                   |
| 27                 | $\text{Pd}_2(\text{dba})_3$ | <b>L24</b> | 90     | 32                     | 4                   |
| 28                 | $\text{Pd}_2(\text{dba})_3$ | <b>L25</b> | 90     | 50                     | 12                  |
| 29                 | $\text{Pd}_2(\text{dba})_3$ | <b>L26</b> | 90     | -                      | -                   |
| 30                 | $\text{Pd}_2(\text{dba})_3$ | <b>L27</b> | 90     | -                      | -                   |

<sup>a</sup>Reaction condition: substrate **1a** (0.10 mmol),  $\text{Pd}_2(\text{dba})_3$  (6 mol%) and **L** (12 mol%) in 1.0 mL anhydrous toluene under argon atmosphere for 8 h. <sup>b</sup>Isolated yield. <sup>c</sup>Determined by HPLC on a chiral stationary phase.

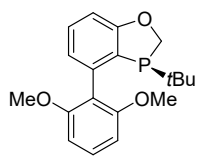

L1

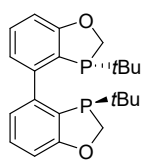

L2

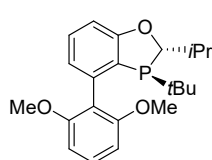

L3

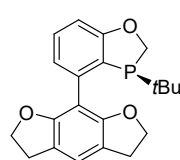

L4

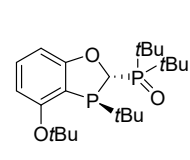

L5

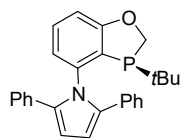

L6

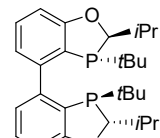

L7

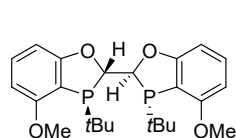

L8

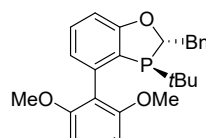

L9

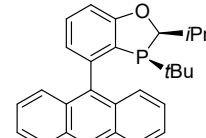

L10

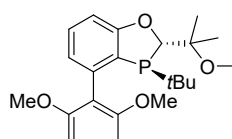

L11

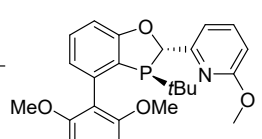

L12

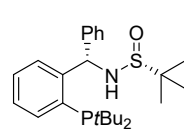

L13

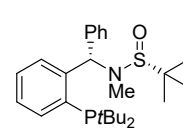

L14

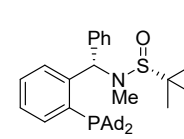

L15

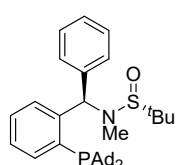

L16

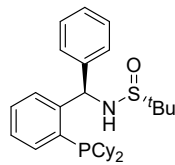

L17

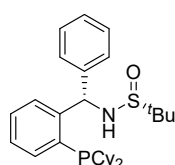

L18

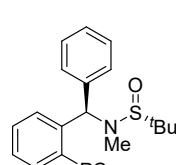

L19

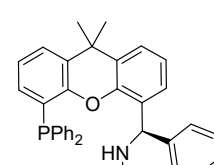

L20

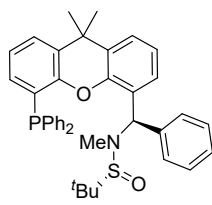

L21

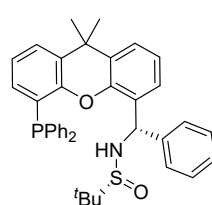

L22

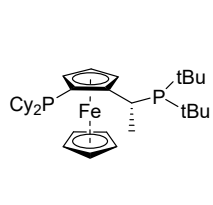

L23

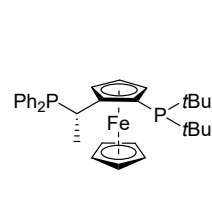

L24

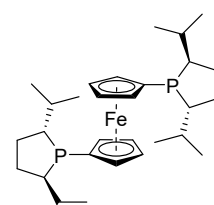

L25

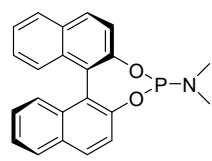

L26

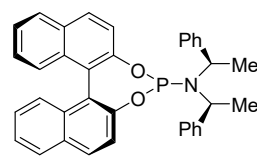

L27

**Table S3.** Studies of the enantioselective [3+2] cycloaddition reactions

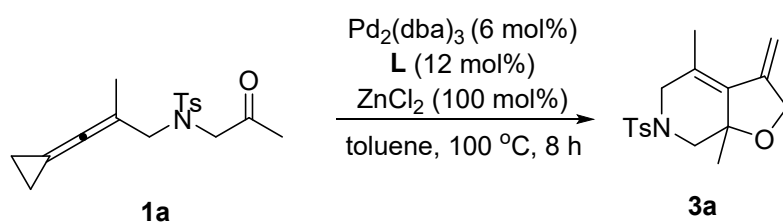

| Entry | L          | Yield (%) | ee <sup>c</sup> (%) |
|-------|------------|-----------|---------------------|
| 1     | <b>L3</b>  | 36        | 0                   |
| 2     | <b>L18</b> | 20        | 0                   |
| 3     | <b>L19</b> | 26        | 0                   |
| 4     | <b>L14</b> | NR        | 0                   |
| 5     | <b>L26</b> | NR        | 0                   |

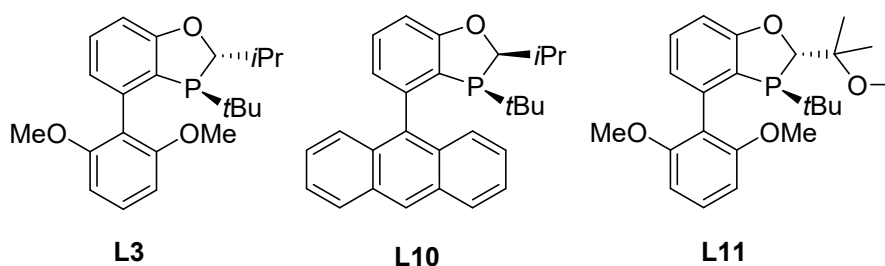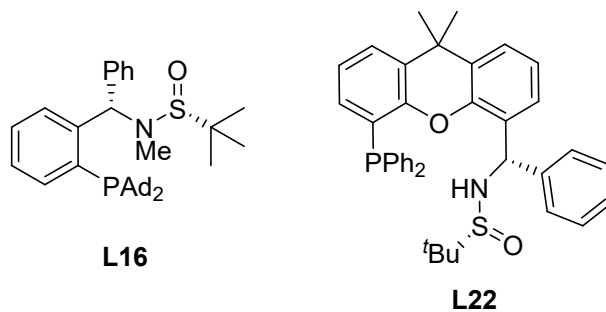

## 6. Control experiment and the other proposed reaction mechanisms

### 6.1 Control experiment

#### 6.1.1 Transformation experiment of 4a to 2a

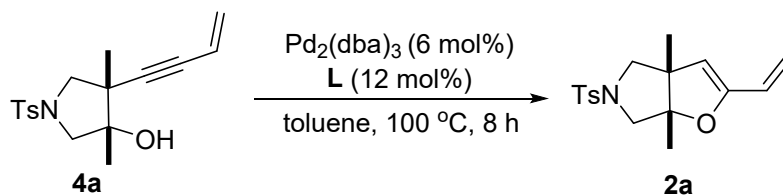

To a 10 mL dried tube was charged with **4a** (0.1 mmol, 1.0 equiv), Pd<sub>2</sub>(dba)<sub>3</sub> (6 mol%) and **L** (12 mol%). The reaction tube was evacuated and backfilled with argon (repeated three times). Then, toluene (1.0 mL) was added into the tube. The reaction mixture was stirred at 100 °C for 8 h. The solvent was removed under reduced pressure and the residue was purified by a flash column chromatography (SiO<sub>2</sub>) to give the corresponding product **2a**.

#### 6.1.2 Equivalent catalyst and ligand reactions

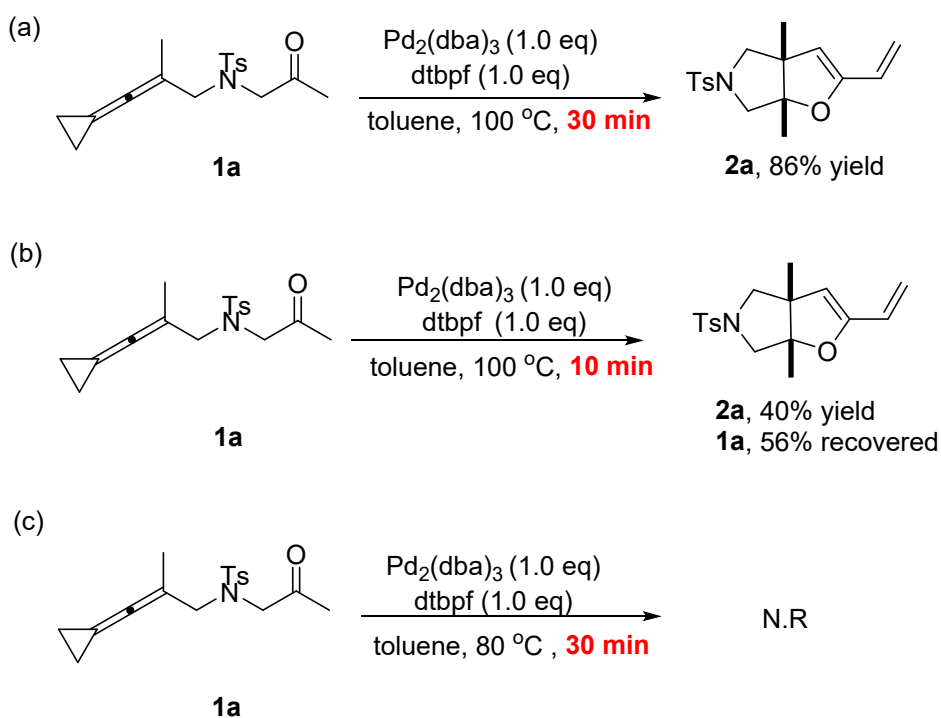

To a 10 mL dried tube was charged with **1a** (0.1 mmol, 1.0 equiv), Pd<sub>2</sub>(dba)<sub>3</sub> (1.0 equiv) and **L** (1.0 equiv). The reaction tube was evacuated and backfilled with argon (repeated three times). Then, toluene (1.0 mL) was added into the tube. The reaction mixture was stirred at 100 °C for 8 h. The solvent was removed under reduced pressure and the residue was purified by a flash column chromatography (SiO<sub>2</sub>) to give the corresponding product **2a**.

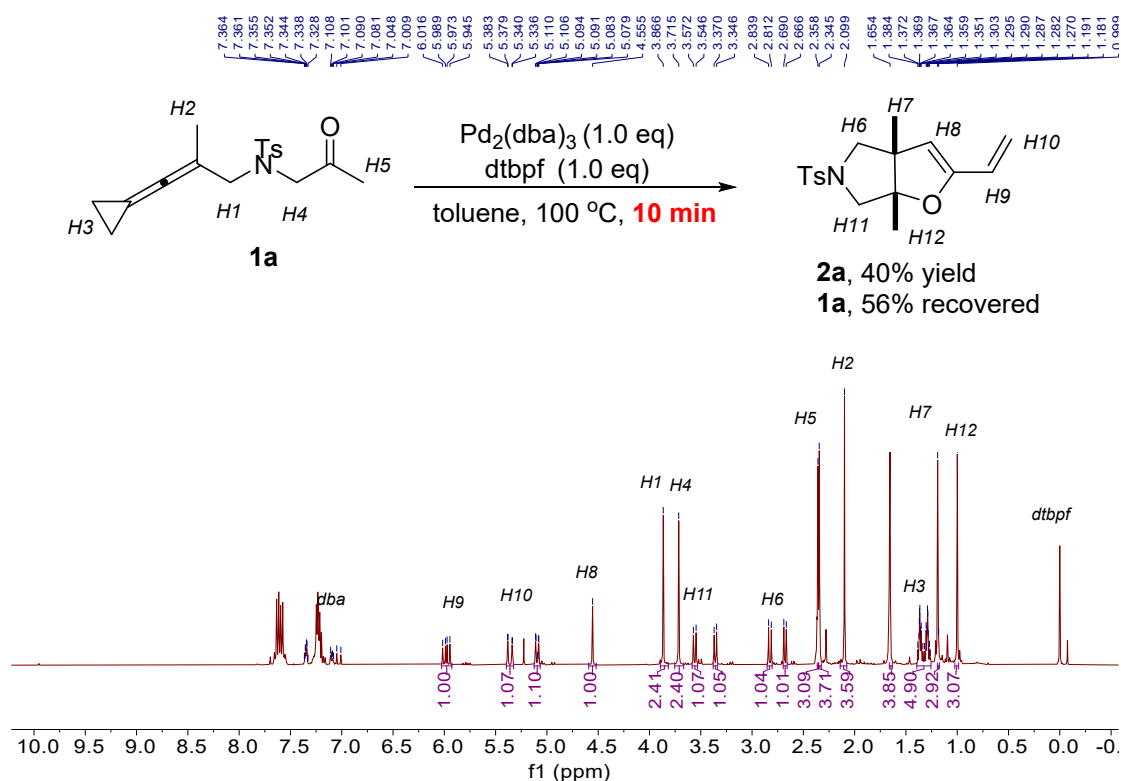

Figure S1.  $^1\text{H}$  NMR spectra of equivalent catalysts and ligands reaction after 10 min

### 6.1.3 Cross-coupling reactions involving nucleophilic reagents

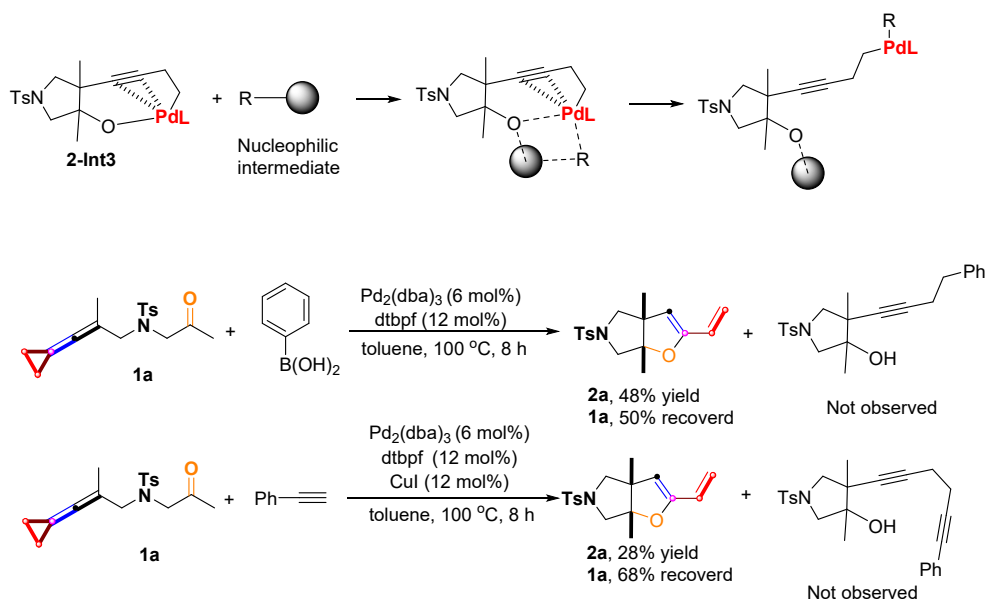

To a 10 mL dried tube was charged with **1a** (0.1 mmol, 1.0 equiv), phenylboronic acid (0.12 mmol, 1.2 equiv) or phenylacetylene (0.12 mmol, 1.2 equiv) and CuI (12 mol%), Pd<sub>2</sub>(dba)<sub>3</sub> (6 mol%) and L (12 mol%). The reaction tube was evacuated and backfilled with argon (repeated three times). Then, toluene (1.0 mL) was added into the tube. The reaction mixture was stirred at 100 °C for 8 h. The solvent was removed under reduced pressure and the residue was purified by a flash column chromatography (SiO<sub>2</sub>) to give the corresponding products.

## 6.2 The other proposed reaction mechanisms

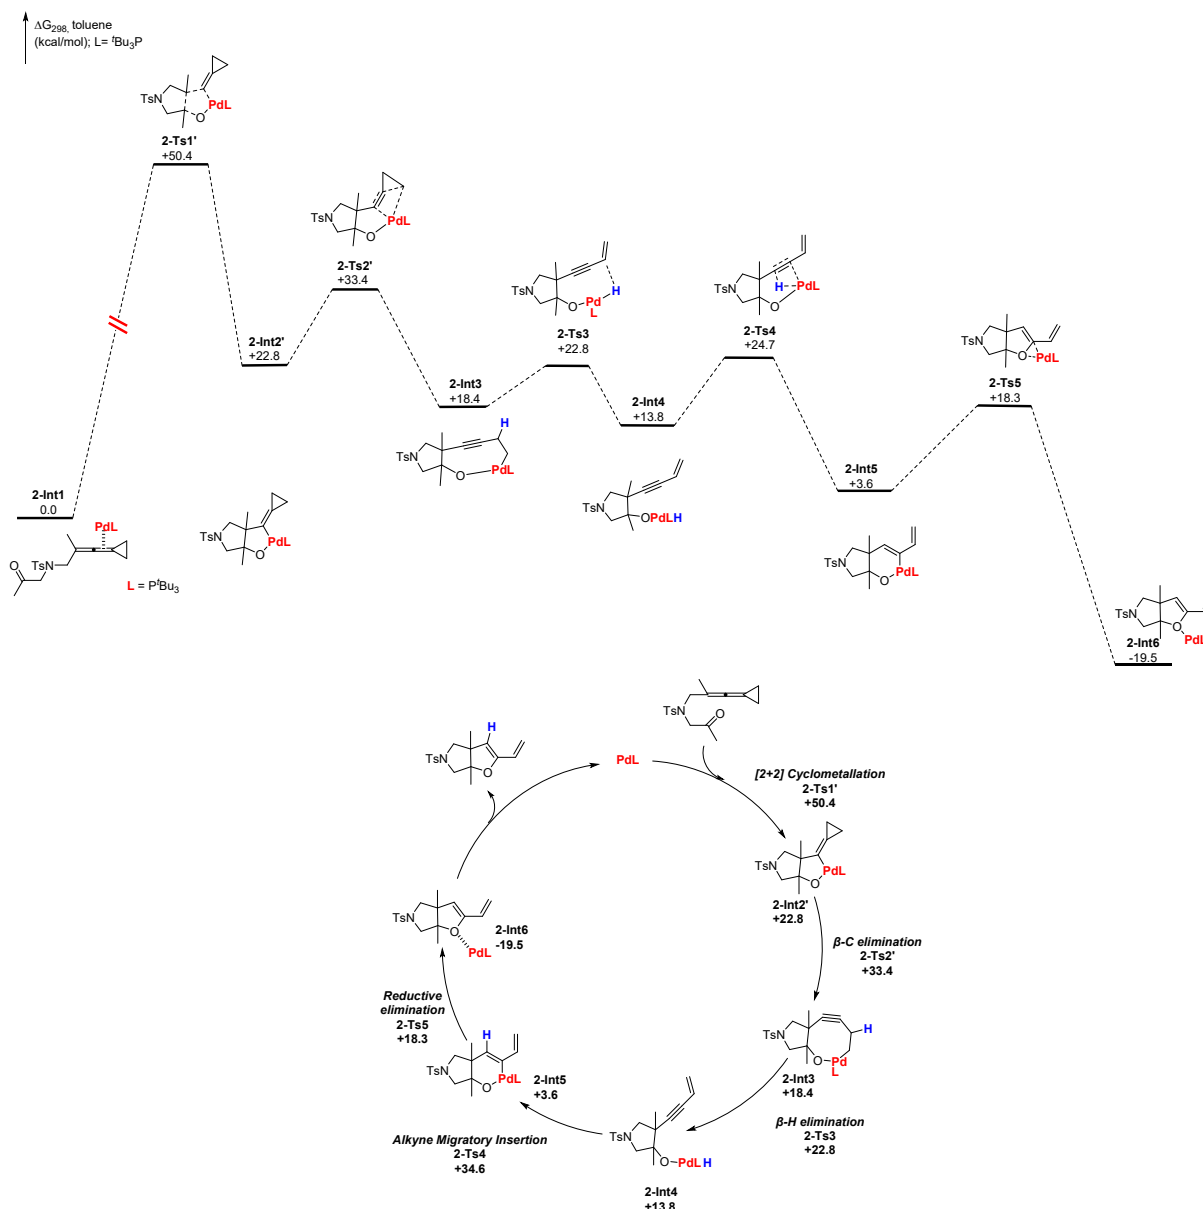

**Scheme S1.** Proposed mechanism involving [2+2] cyclometallation process.

We also investigated another possible pathway to form the intermediate **2-Int3**. We propose that the reaction initiates through a cyclometallation process via **2-Ts1'** to give an intermediate **2-Int2'**, but it requires an extremely high energy barrier (50.4 kcal/mol) to implement the process. **2-Int2'** can occur β-carbon elimination to generate **2-Int3** via **2-Ts2'** with an energy barrier of 10.6 kcal/mol.

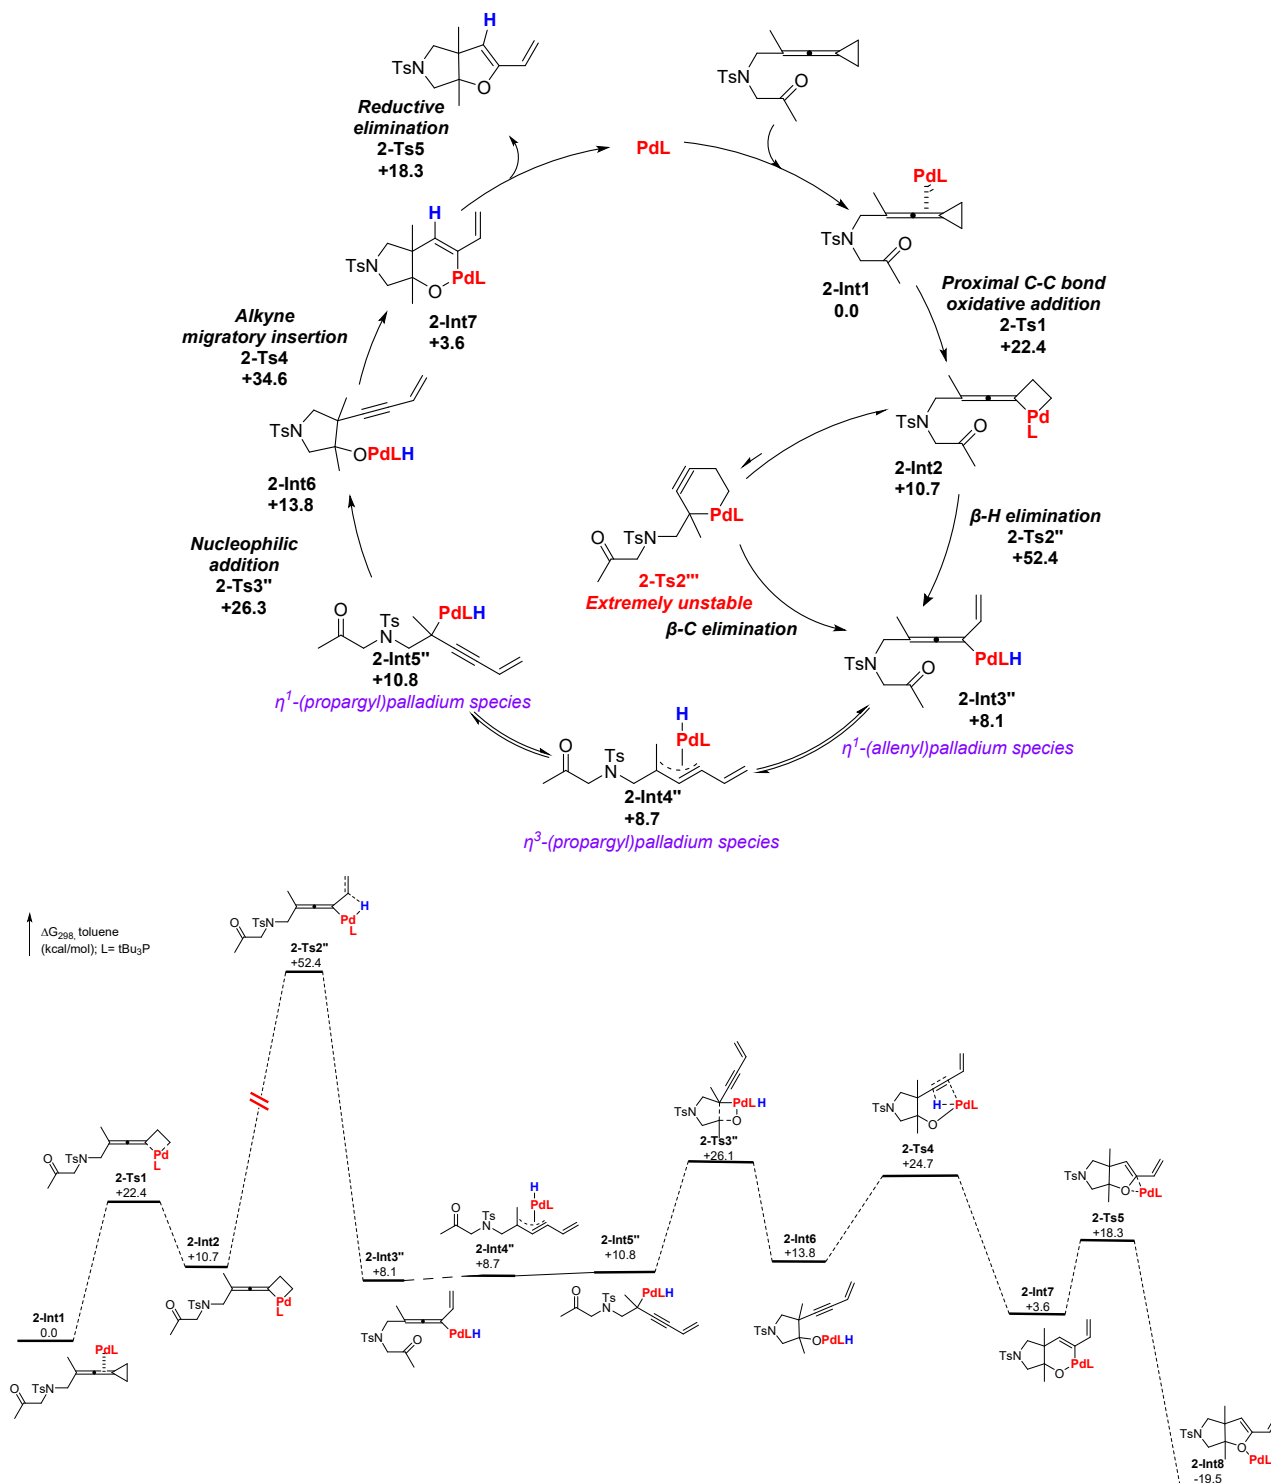

**Scheme S2.** Proposed catalytic cycle

We investigated an alternative reaction pathway starting from a stable palladium complex **2-Int1** (shown in Scheme S2), in which the allene units of **1a** is coordinated to palladium catalyst. The **2-Int1** can undergo an oxidative cyclometallation to give a palladacyclic **2-Int2** through **2-Ts1** with an energy barrier of 22.4 kcal/mol. The intermediate **2-Int2** subsequently undergoes  $\beta$ -hydrogen



elimination to generate an intermediate **2-Int3**'' via transition state **2-TS2**'' with an extremely high energy barrier of 41.7 kcal/mol. We envisaged the formation of **2-Int2**''' through the isomerization of **2-Int2**, but the optimization process of **2-Int2**''' indicates that this type of intermediate is unstable and still goes back to **2-Int2** intermediate. Then, the  $\eta^1$ -(allenyl)palladium-H **2-Int3**'' could be transformed to  $\eta^3$ -(propargyl)palladium-H species **2-Int4**'' ( $\Delta G = 0.6$  kcal/mol) and  $\eta^1$ -(propargyl)palladium-H species **2-Int5**'' ( $\Delta G = 2.1$  kcal/mol). Subsequently, intramolecular C=O bond insertion occurs via **2-Ts3**'' to give **2-Int6** with an activation free energy of 15.3 kcal/ mol. Then **2-Int6** undergo migratory insertion via **2-Ts4** to generate **2-Int7** with a free energy of 20.8 kcal/ mol. Subsequently, reductive elimination of **2-Int7** is followed to afford **2-Int8** with an energy barrier of 14.7 kcal/ mol. This reaction pathway also involves the step having extremely high energy barrier, thus, we exclude this pathway.

## 7. Gram scale reaction and synthetic transformation of the products

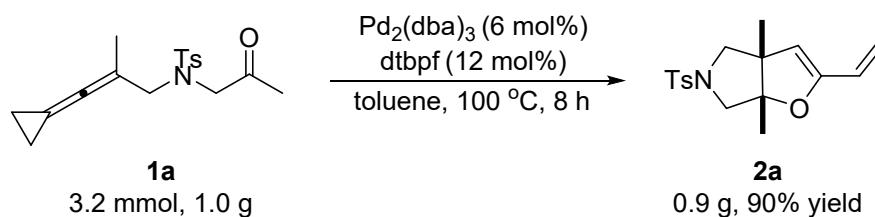

To a 10 mL dried tube was charged with **1a** (1.0 g, 3.2 mmol),  $\text{Pd}_2\text{dba}_3$  (175.7 mg, 0.19 mmol) and dtbpf (182.2 mg, 0.38 mmol). The reaction tube was evacuated and backfilled with argon (repeated three times). Then, toluene (40.0 mL) was added into the reaction tube. The reaction mixture was stirred at 100 °C for 8 h. The solvent was removed under reduced pressure and the residue was purified by a flash column chromatography ( $\text{SiO}_2$ ) to give the corresponding product **2a** (0.9 g, 90% yield).

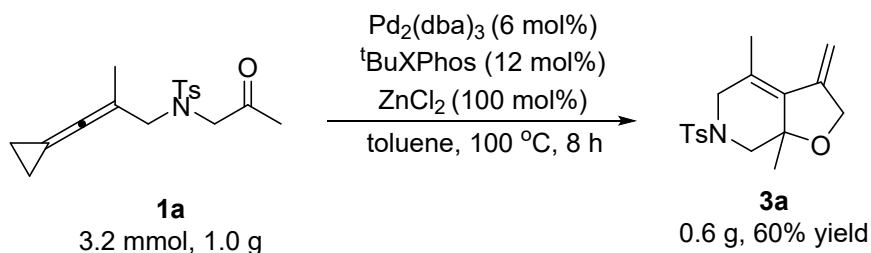

To a 10 mL dried tube was charged with **1a** (1.0 g, 3.2 mmol),  $\text{Pd}_2\text{dba}_3$  (175.7 mg, 0.19 mmol) and  $^t\text{BuXPhos}$  (162.8 mg, 0.38 mmol) and  $\text{ZnCl}_2$  (435.2 mg, 3.2 mmol). The reaction tube was evacuated and backfilled with argon (repeated three times). Then, toluene (40.0 mL) was added into the reaction tube. The reaction mixture was stirred at 100 °C for 8 h. The solvent was removed under reduced pressure and the residue was purified by a flash column chromatography ( $\text{SiO}_2$ ) to give the corresponding product **3a** (0.6 g, 60% yield).

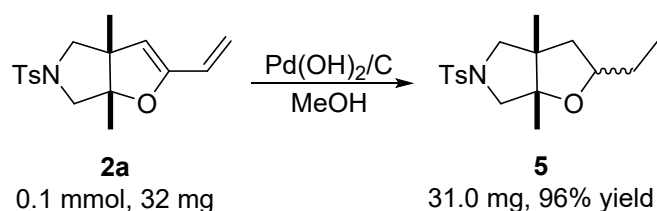

To a solution of **2a** (32.0 mg, 0.1 mmol) in MeOH (5 mL) was added Pd(OH)<sub>2</sub>/C (7.6 mg, 20% w/w). The reaction system was charged with H<sub>2</sub> balloon and the reaction mixture was stirred at rt for 12 h. The reaction mixture was filtered and the volatiles were removed on a rotary evaporator. The residues were passed through a short silica chromatography (PE/EA = 1/1) to afford the desired product **5** (31 mg, 96% yield).

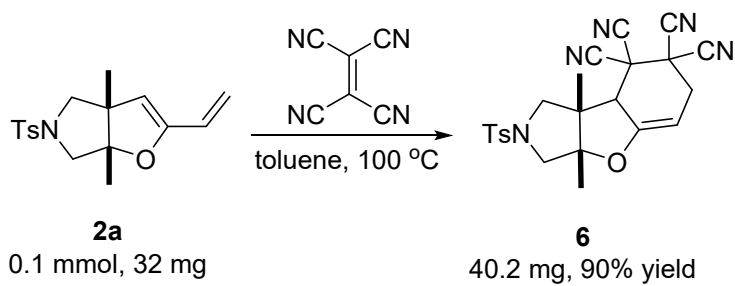

To a 10 mL dried tube was charged with **2a** (32 mg, 0.1 mmol), 1,1,2,2-tetracyanoethene (2.0 equiv, 0.2 mmol) and 1.0 mL toluene and the resulting mixture was stirred at 100 °C for 3 h. The reaction mixture was filtered and the volatiles were removed on a rotary evaporator. The residues were passed through a short silica chromatography (PE/EA = 4/1) to afford the desired product **6** (40.2 mg, 90% yield).

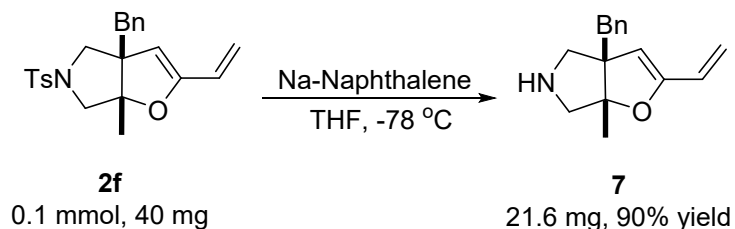

A solution 1.0 M of sodium naphthalenide in THF was prepared as follows: to a stirred solution of naphthalene (5.0 g, 39 mmol) in 39 mL of THF, sodium metal (1.1 g, 47 mmol) was added under



The reaction mixture was stirred for 3 h. After quenched by adding aqueous Na<sub>2</sub>S<sub>2</sub>O<sub>3</sub> solution and extracted by EA, the combined organic phase was washed with brine, dried over anhydrous Na<sub>2</sub>SO<sub>4</sub>, filtered, and concentrated under vacuum. The residue was purified by flash column chromatography (PE/EA = 4:1) to give the desired product **9** (28.9 mg, 58% yield).

The 2,5-dimethylpyrazole (113 mg, 1.2 mmol) and CrO<sub>3</sub> (2.2 mg, 0.006 mmol, 0.06 eq.) was added in dry DCM (1.0 mL) at -20 °C. After stirring for 15 min at this temperature, a solution of **3a** (32 mg, 0.10 mmol) in DCM (0.5 mL) was added dropwise, and the resulting mixture was stirred for an additional hour. Then, NaOH (5M, 1.0 mL) was added and the reaction mixture was further stirred at 0 °C for 30 min. The reaction was quenched by 1.0 M HCl solution, extracted with EtOAc (3 x 10 mL) and dried over anhydrous Na<sub>2</sub>SO<sub>4</sub>. The organic phase was then concentrated under reduced pressure and the residue was purified by a flash chromatography (PE/EA = 4:1) to afford the corresponding product **10** (11.9 mg, 36%).

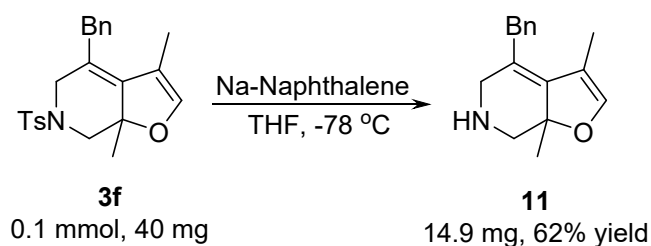

A solution 1.0 M of sodium naphthalenide in THF was prepared as follows: to a stirred solution of naphthalene (5.0 g, 39 mmol) in 39 mL of THF, sodium metal (1.1 g, 47 mmol) was added under nitrogen atmosphere, and the resulting solution was stirred for 1 h. A solution of **3f** (40 mg, 0.1 mmol) in anhydrous THF (2.0 mL) was cooled to -78 °C under nitrogen atmosphere and 1.0 mL (1.0 mmol) of 1.0 M sodium naphthalenide in THF was added dropwise. The reaction mixture was stirred for 40 min at this temperature. After being stirred for 30 min, the reaction was quenched with saturated NH<sub>4</sub>Cl aqueous solution, extracted with ethyl acetate, dried over anhydrous MgSO<sub>4</sub>, filtered, and evaporated. The residue was chromatographed through a silica gel column (DCM/MeOH = 6/1) to afford product **11** (14.9 mg, 62% yield).

## 8. Spectroscopic data of substrates 1.

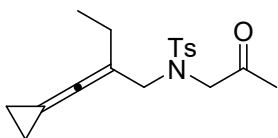

### *N*-(2-(cyclopropylidene- $\lambda^5$ -methylene)butyl)-4-methyl-*N*-(2-oxopropyl)benzenesulfonamide

#### (1b)

A colorless oil, 90% yield, 299.7 mg.  $^1\text{H}$  NMR ( $\text{CDCl}_3$ , TMS, 400 MHz)  $\delta$  7.70 (d,  $J = 8.0$  Hz, 2H), 7.30 (d,  $J = 8.0$  Hz, 2H), 3.90 (s, 2H), 3.85 (s, 2H), 2.42 (s, 3H), 2.28 (p,  $J = 6.8$  Hz, 1H), 2.17 (s, 3H), 1.48 – 1.32 (m, 4H), 1.01 (t,  $J = 6.8$  Hz, 3H).  $^{13}\text{C}$  NMR ( $\text{CDCl}_3$ , TMS, 150 MHz)  $\delta$  204.1, 187.9, 143.5, 136.0, 129.6, 127.5, 108.0, 79.7, 55.7, 50.7, 28.6, 27.0, 21.6, 21.5, 7.4. IR (neat)  $\nu$  815, 987, 1157, 1216, 1346, 1447, 2018, 2869, 2926, 2959  $\text{cm}^{-1}$ . HRMS (ESI) calcd. for  $\text{C}_{18}\text{H}_{23}\text{NO}_3\text{SNa}$  ( $\text{M}+\text{Na}$ ) $^+$ : 356.1291, Found: 356.1293.

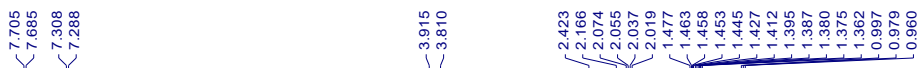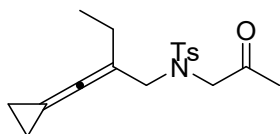

$^1\text{H}$  NMR ( $\text{CDCl}_3$ , 400 MHz, TMS)

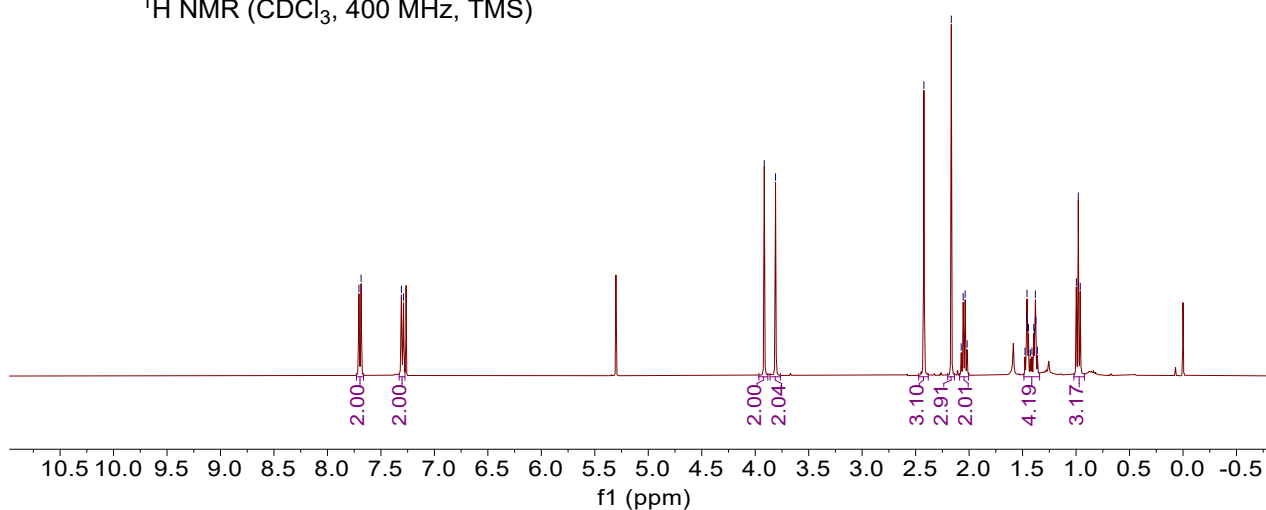

— 204.056

— 187.935

— 143.497

— 135.991

— 129.575

— 127.498

— 108.041

— 79.738

— 77.389

— 77.071

— 76.753

— 55.707

— 50.688

— 28.558

— 26.971

— 21.566

— 21.547

— 7.357

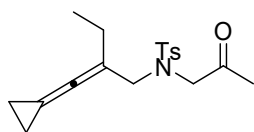

$^{13}\text{C}$  NMR ( $\text{CDCl}_3$ , 150 MHz, TMS)

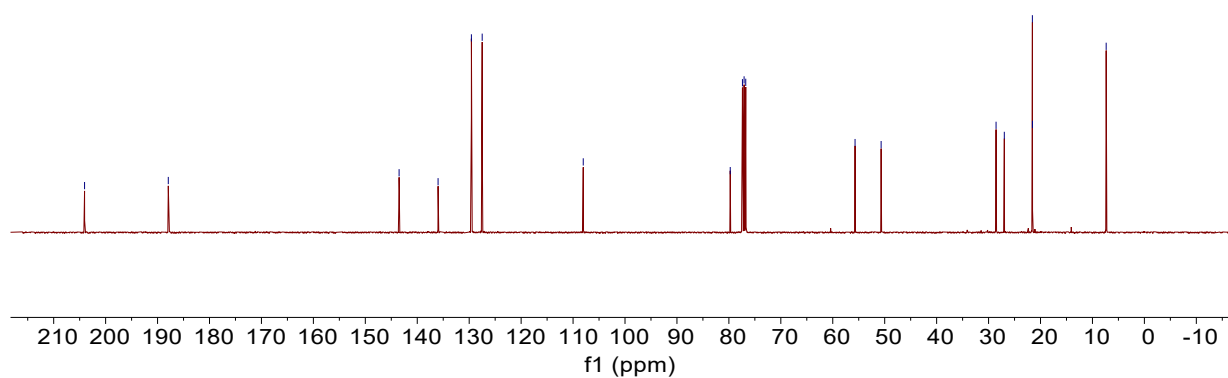

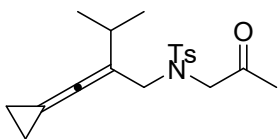

***N*-(2-(cyclopropylidene- $\lambda^5$ -methylene)-3-methylbutyl)-4-methyl-*N*-(2-oxopropyl)benzenesulfonamide (1c)**

A colorless oil, 88% yield, 305.4 mg.  $^1\text{H}$  NMR ( $\text{CDCl}_3$ , TMS, 400 MHz)  $\delta$  7.70 (d,  $J = 8.0$  Hz, 2H), 7.30 (d,  $J = 8.0$  Hz, 2H), 3.90 (s, 2H), 3.85 (s, 2H), 2.42 (s, 3H), 2.28 (p,  $J = 6.8$  Hz, 1H), 2.17 (s, 3H), 1.48 – 1.32 (m, 4H), 1.01 (d,  $J = 6.8$  Hz, 6H).  $^{13}\text{C}$  NMR ( $\text{CDCl}_3$ , TMS, 150 MHz)  $\delta$  204.0, 188.6, 143.5, 136.1, 129.6, 127.5, 103.3, 79.3, 55.8, 52.1, 26.9, 23.5, 21.6, 12.1, 7.3. IR (neat)  $\nu$  815, 987, 1157, 1216, 1346, 1447, 2018, 2869, 2926, 2959  $\text{cm}^{-1}$ . HRMS (ESI) calcd. for  $\text{C}_{19}\text{H}_{25}\text{NO}_3\text{SNa}$  ( $\text{M}+\text{Na}$ ) $^+$ : 370.1447, Found: 370.1440.

7.697  
7.676  
7.298  
7.278  
7.260

3.895  
3.842

2.412  
2.315  
2.302  
2.285  
2.268  
2.251  
2.234  
2.217  
2.157  
1.461  
1.444  
1.438  
1.429  
1.426  
1.369  
1.366  
1.361  
1.353  
1.337  
1.012  
1.008  
0.995

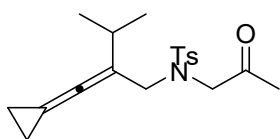

$^1\text{H}$  NMR ( $\text{CDCl}_3$ , 400 MHz, TMS)

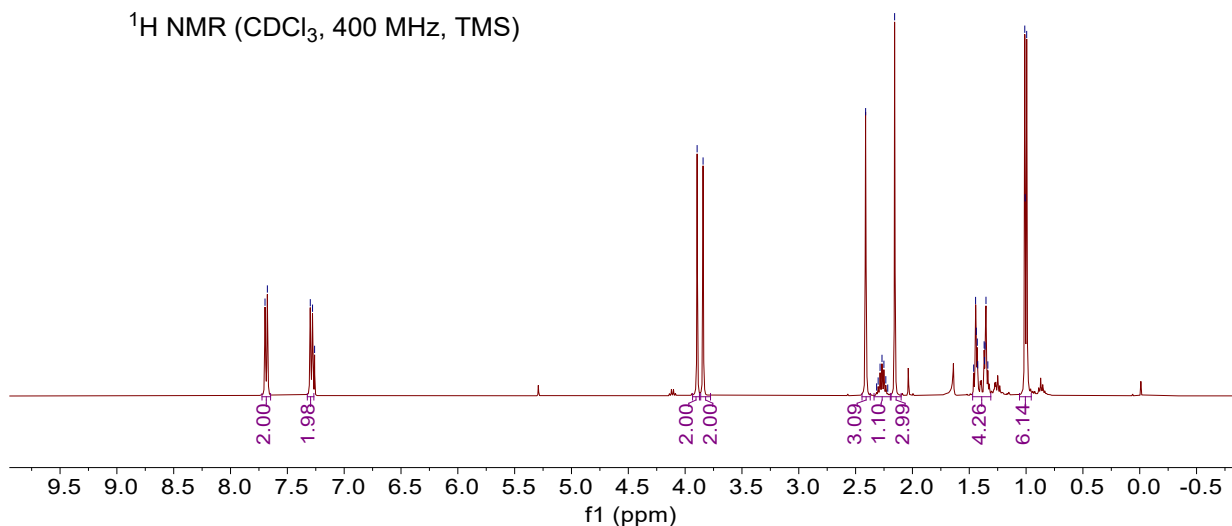



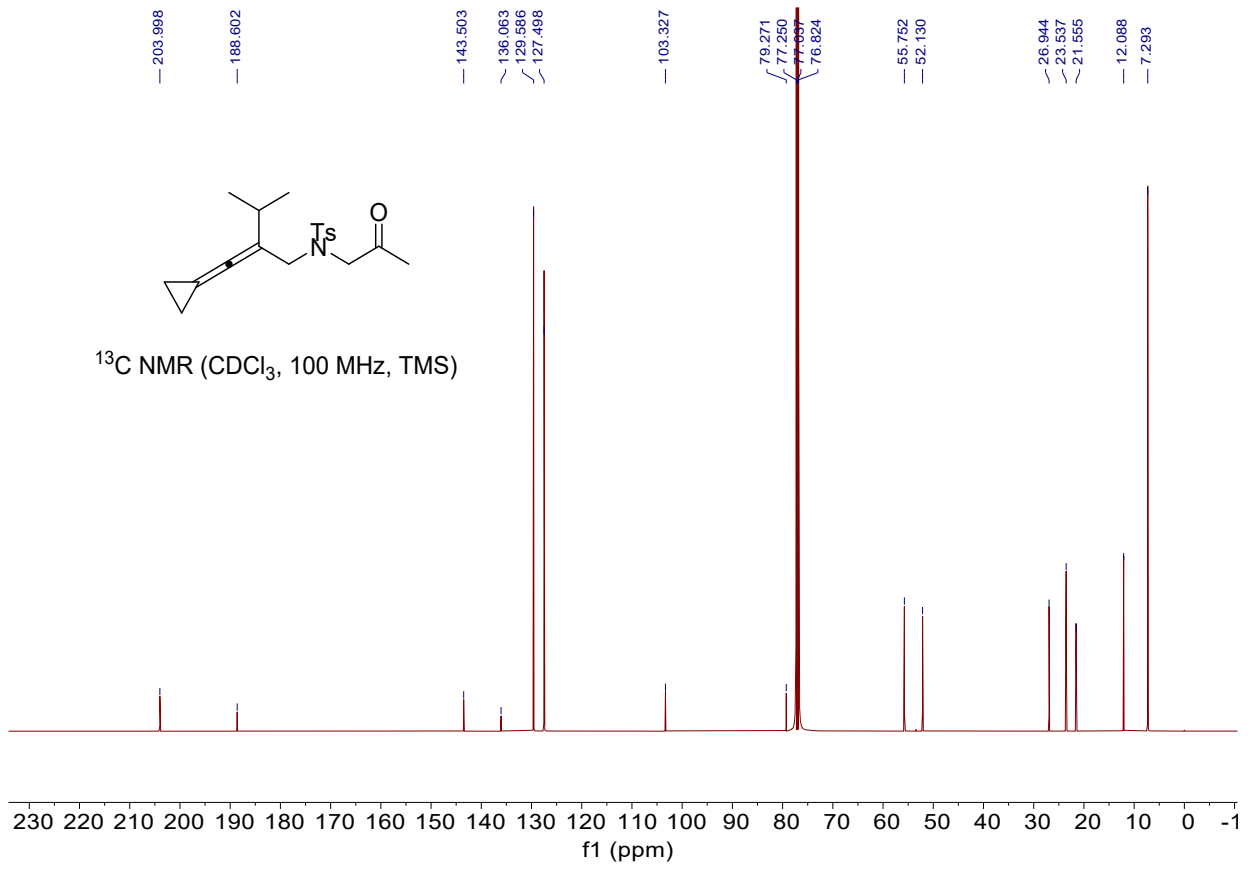

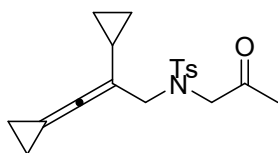

***N*-(2-cyclopropyl-3-cyclopropylidene- $\lambda^5$ -allyl)-4-methyl-*N*-(2-oxopropyl)benzenesulfonamide**

**(1d)**

A colorless oil, 90% yield, 310.5 mg.  $^1\text{H}$  NMR ( $\text{CDCl}_3$ , TMS, 400 MHz)  $\delta$  7.71 (d,  $J = 8.0$  Hz, 2H), 7.30 (d,  $J = 8.0$  Hz, 2H), 3.94 (s, 2H), 3.91 (s, 2H), 2.42 (s, 3H), 2.21 (s, 3H), 1.48 – 1.34 (m, 4H), 1.27 – 1.16 (m, 1H), 0.73 – 0.61 (m, 2H), 0.40 – 0.31 (m, 2H).  $^{13}\text{C}$  NMR ( $\text{CDCl}_3$ , TMS, 150 MHz)  $\delta$  204.3, 186.80, 186.78, 143.5, 136.1, 129.6, 127.5, 127.2, 105.0, 80.5, 55.8, 52.4, 27.0, 21.6, 10.9, 7.48, 7.46. IR (neat)  $\nu$  815, 987, 1157, 1216, 1346, 1447, 2018, 2869, 2926, 2959  $\text{cm}^{-1}$ . HRMS (ESI) calcd. for  $\text{C}_{19}\text{H}_{23}\text{NO}_3\text{SNa}$  ( $\text{M}+\text{Na}$ ) $^+$ : 368.1290, Found: 368.1293.

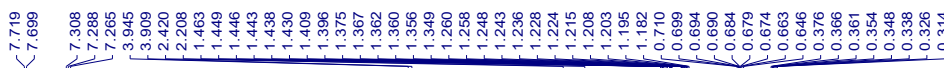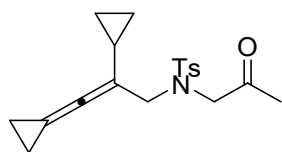

$^1\text{H}$  NMR ( $\text{CDCl}_3$ , 400 MHz, TMS)

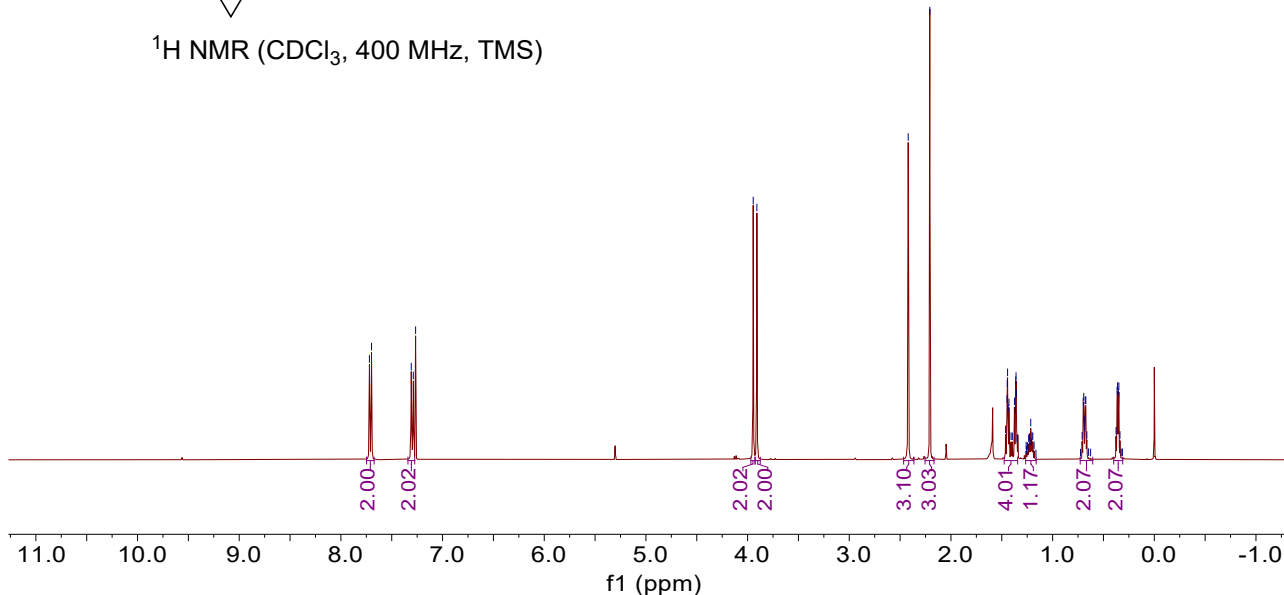

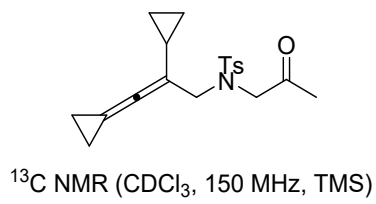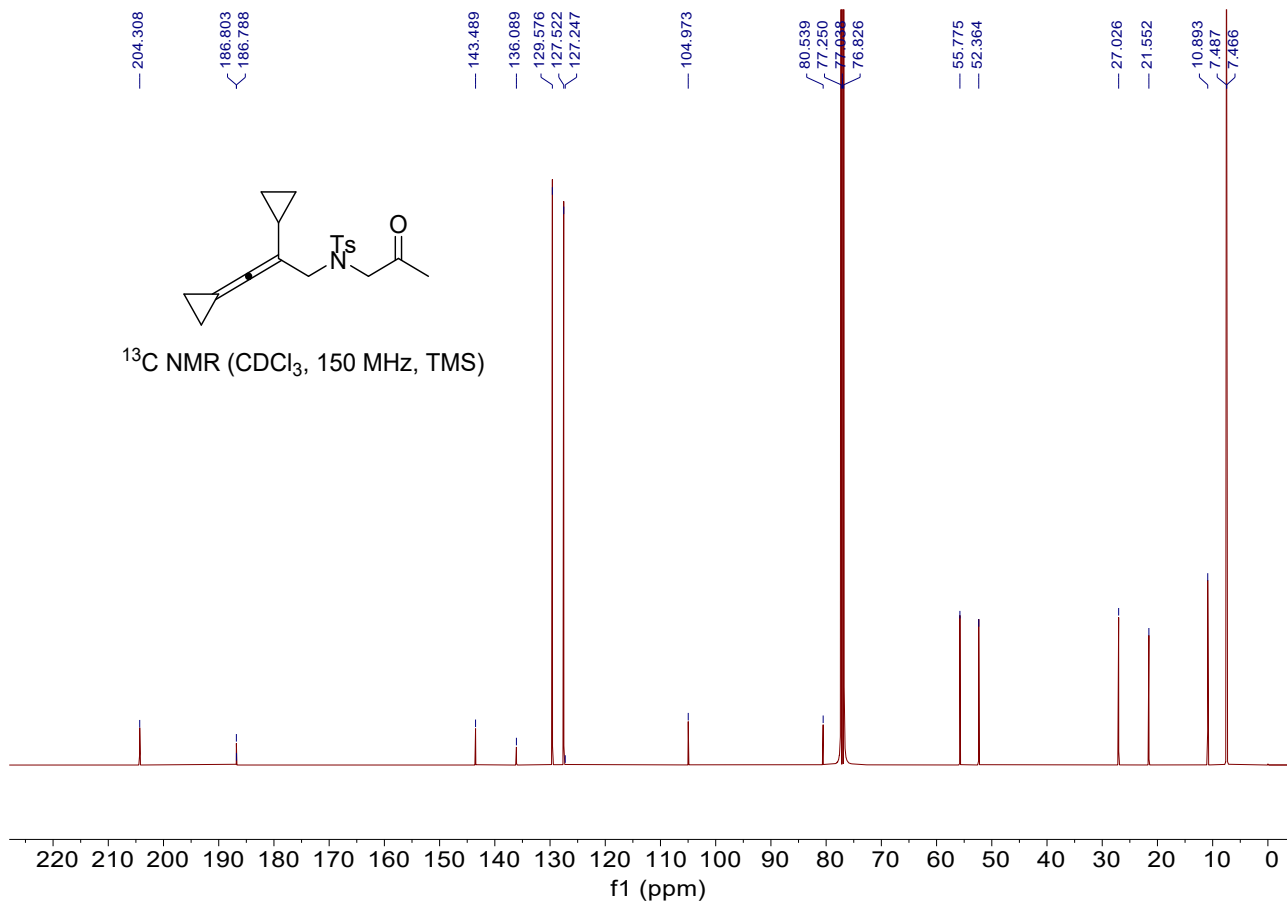

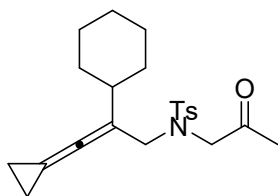

***N*-(2-cyclohexyl-3-cyclopropylidene- $\lambda^5$ -allyl)-4-methyl-*N*-(2-oxopropyl)benzenesulfonamide  
(1e)**

A yellow oil, 90% yield, 348.3 mg.  $^1\text{H}$  NMR ( $\text{CDCl}_3$ , TMS, 400 MHz)  $\delta$  7.70 (d,  $J = 8.0$  Hz, 2H), 7.30 (d,  $J = 8.0$  Hz, 2H), 3.92 (s, 2H), 3.84 (s, 2H), 2.42 (s, 3H), 2.17 (s, 3H), 1.78 – 1.55 (m, 6H), 1.47 – 1.34 (m, 4H), 1.24 – 1.00 (m, 5H).  $^{13}\text{C}$  NMR ( $\text{CDCl}_3$ , TMS, 100 MHz)  $\delta$  204.1, 188.5, 143.5, 136.1, 129.6, 127.5, 107.1, 79.3, 55.6, 50.4, 38.0, 32.1, 27.0, 26.3, 26.2, 21.5, 7.4. IR (neat)  $\nu$  815, 987, 1157, 1216, 1346, 1447, 2018, 2869, 2926, 2959  $\text{cm}^{-1}$ . HRMS (ESI) calcd. for  $\text{C}_{22}\text{H}_{29}\text{NO}_3\text{SNa}$  ( $\text{M}+\text{Na}$ ) $^+$ : 410.1760, Found: 410.1757.

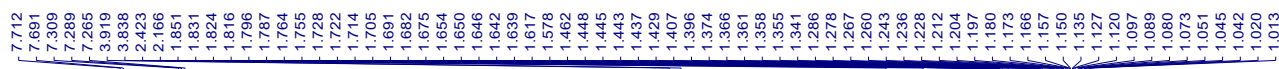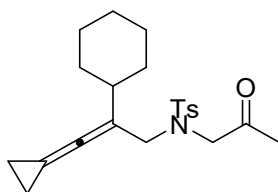

$^1\text{H}$  NMR ( $\text{CDCl}_3$ , 400 MHz, TMS)

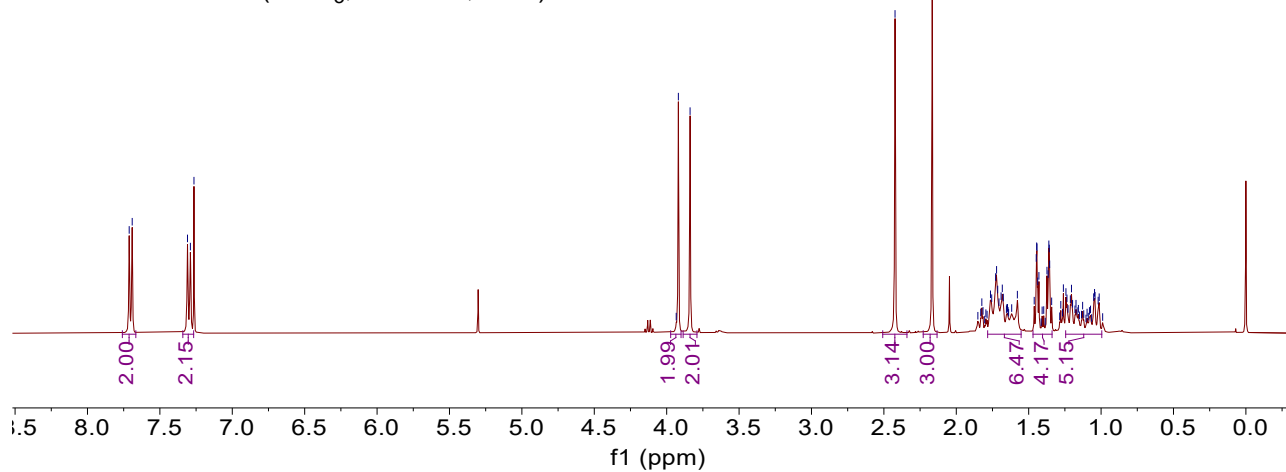

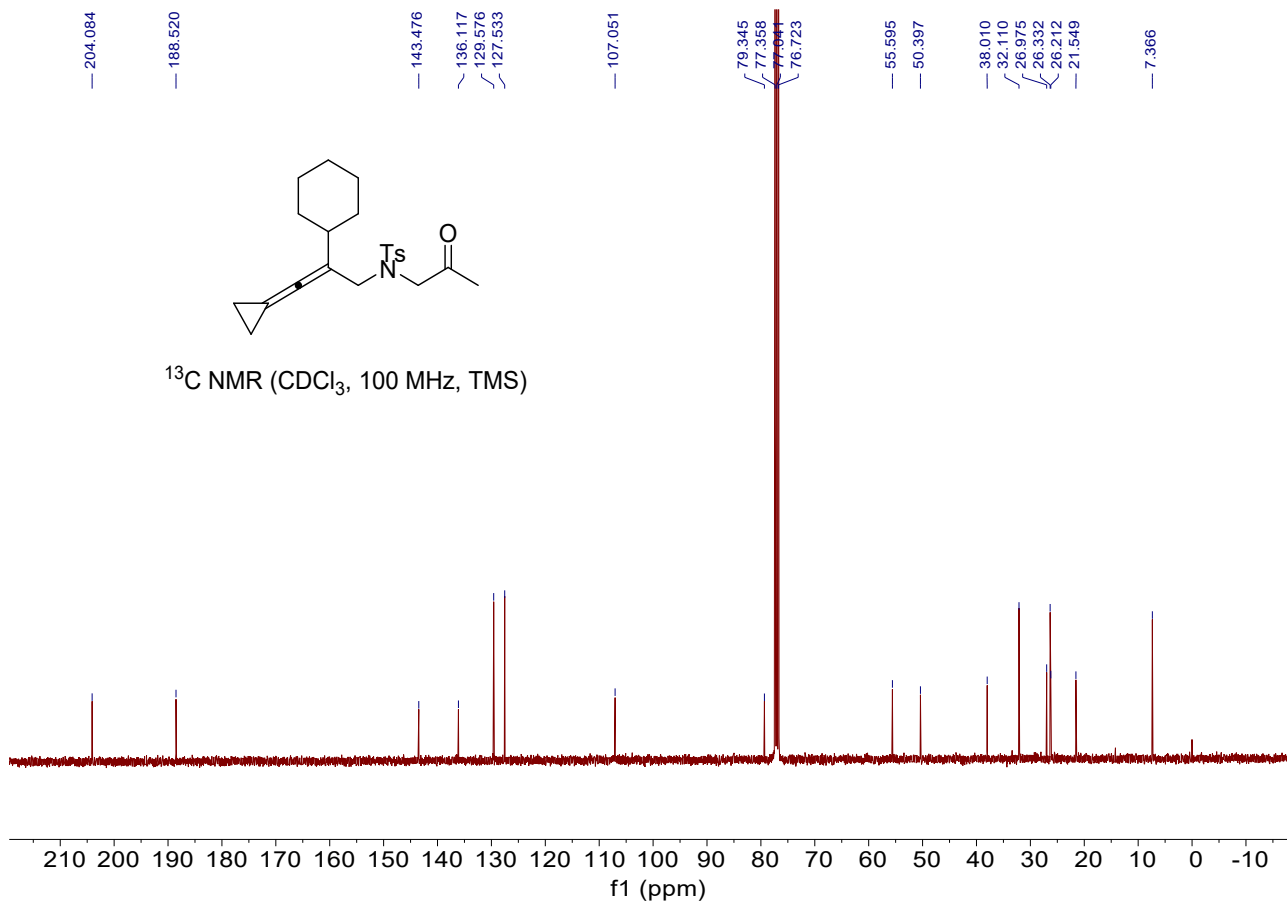

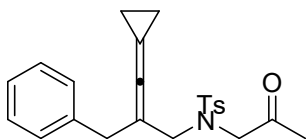

***N*-(2-benzyl-3-cyclopropylidene- $\lambda^5$ -allyl)-4-methyl-*N*-(2-oxopropyl)benzenesulfonamide (1f)**

A yellow oil, 90% yield, 355.5 mg.  $^1\text{H}$  NMR ( $\text{CDCl}_3$ , TMS, 600 MHz)  $\delta$  7.66 (d,  $J = 8.0$  Hz, 2H), 7.31 – 7.24 (m, 4H), 7.23 – 7.14 (m, 3H), 3.93 (s, 2H), 3.76 (s, 2H), 3.35 (s, 2H), 2.41 (s, 3H), 2.15 (s, 3H), 1.44 – 1.34 (m, 4H).  $^{13}\text{C}$  NMR ( $\text{CDCl}_3$ , TMS, 150 MHz)  $\delta$  203.8, 190.0, 143.5, 139.1, 136.1, 129.6, 129.1, 128.3, 127.5, 126.3, 101.0, 78.8, 55.9, 51.3, 37.3, 27.0, 21.6, 7.5. IR (neat)  $\nu$  768, 1157, 1346, 1497, 1736, 2021, 2937, 3034, 3055  $\text{cm}^{-1}$ . HRMS (ESI) calcd. for  $\text{C}_{23}\text{H}_{25}\text{NO}_3\text{SNa}$  ( $\text{M}+\text{Na}$ ) $^+$ : 418.1447, Found: 418.1446.

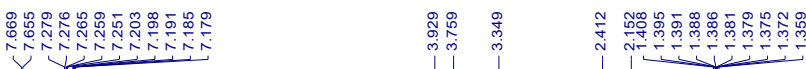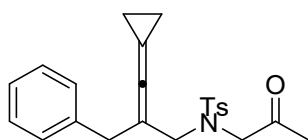

$^1\text{H}$  NMR ( $\text{CDCl}_3$ , 600 MHz, TMS)

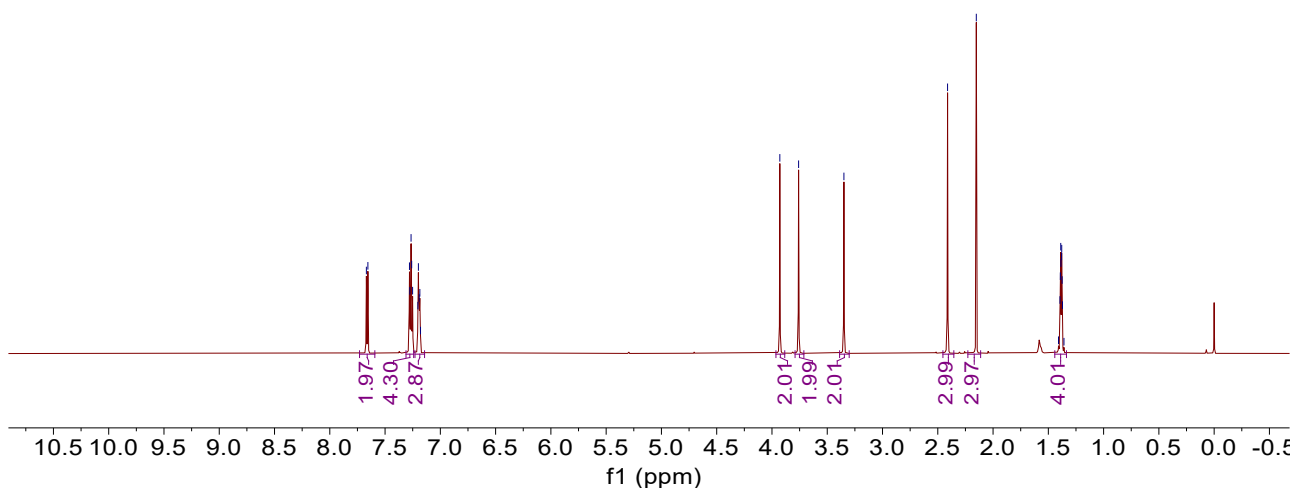

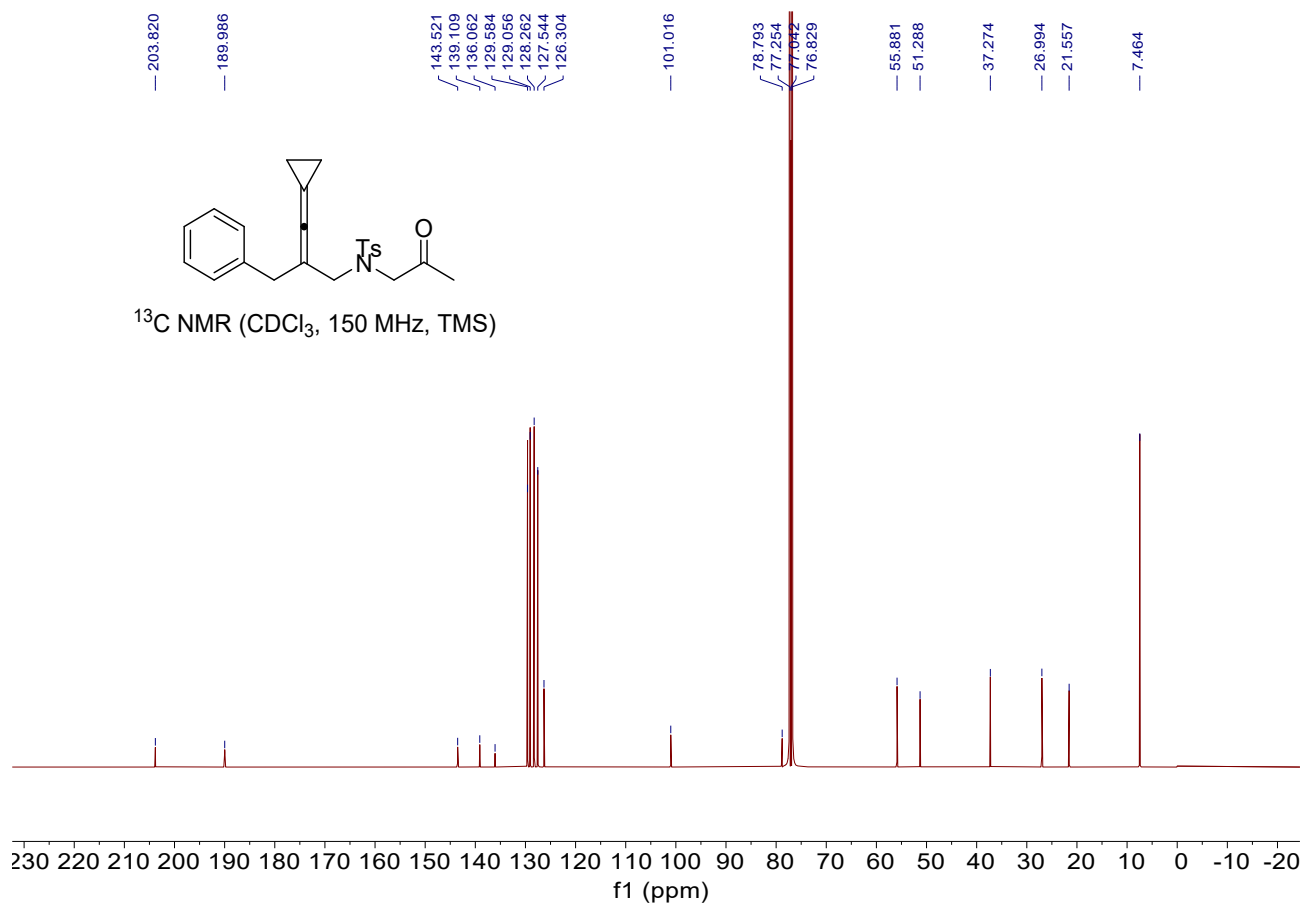

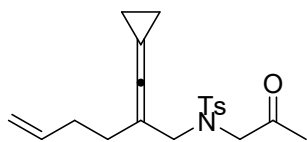

***N*-(2-(cyclopropylidene- $\lambda^5$ -methylene)hex-5-en-1-yl)-4-methyl-*N*-(2-oxopropyl)benzenesulfonamide (1g)**

A colorless oil, 88% yield, 315.9 mg.  $^1\text{H}$  NMR ( $\text{CDCl}_3$ , TMS, 400 MHz)  $\delta$  7.70 (d,  $J = 8.0$  Hz, 2H), 7.30 (d,  $J = 8.0$  Hz, 2H), 5.85 – 5.70 (m, 1H), 5.02 – 4.91 (m, 2H), 3.94 (s, 2H), 3.81 (s, 2H), 2.42 (s, 3H), 2.18 – 2.04 (m, 7H), 1.48 – 1.35 (m, 4H).  $^{13}\text{C}$  NMR ( $\text{CDCl}_3$ , TMS, 100 MHz)  $\delta$  203.9, 189.0, 143.5, 138.1, 136.1, 129.6, 127.5, 114.9, 101.0, 79.2, 55.6, 52.1, 31.7, 29.6, 27.0, 21.6, 7.3. IR (neat)  $\nu$  668, 1157, 1348, 1737, 2020, 2926, 2970, 2989  $\text{cm}^{-1}$ . HRMS (ESI) calcd. for  $\text{C}_{20}\text{H}_{25}\text{NO}_3\text{SNa}$  ( $\text{M}+\text{Na}$ ) $^+$ : 382.1447, Found: 382.1449.

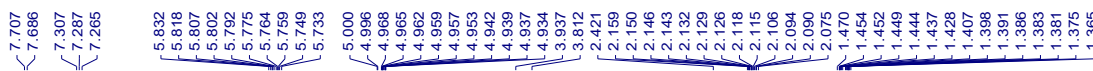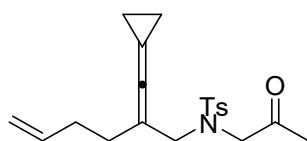

$^1\text{H}$  NMR ( $\text{CDCl}_3$ , 400 MHz, TMS)

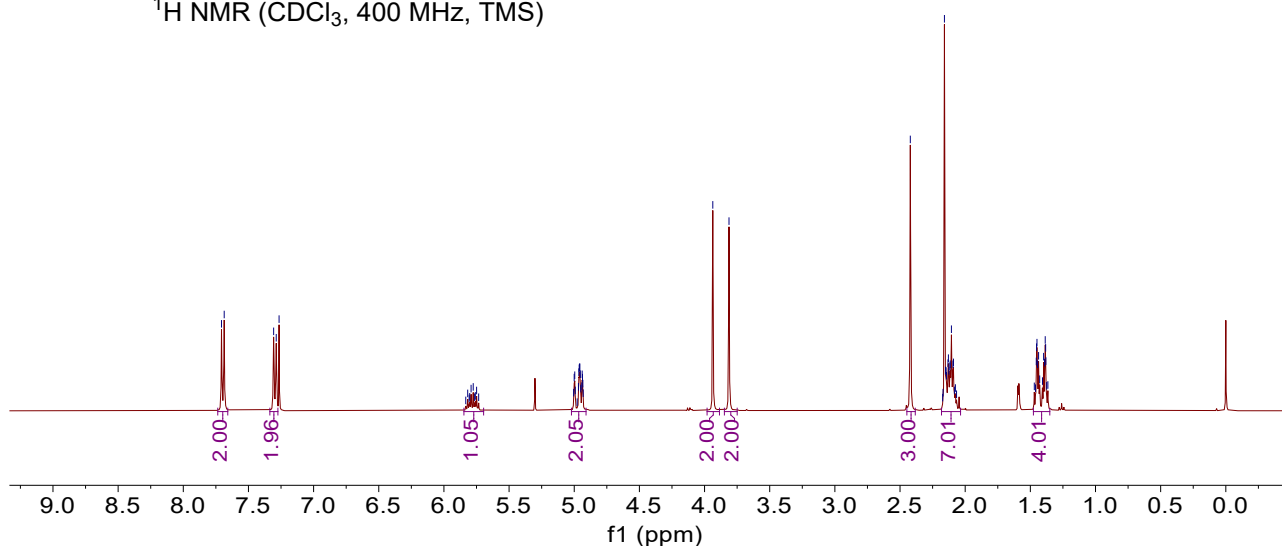



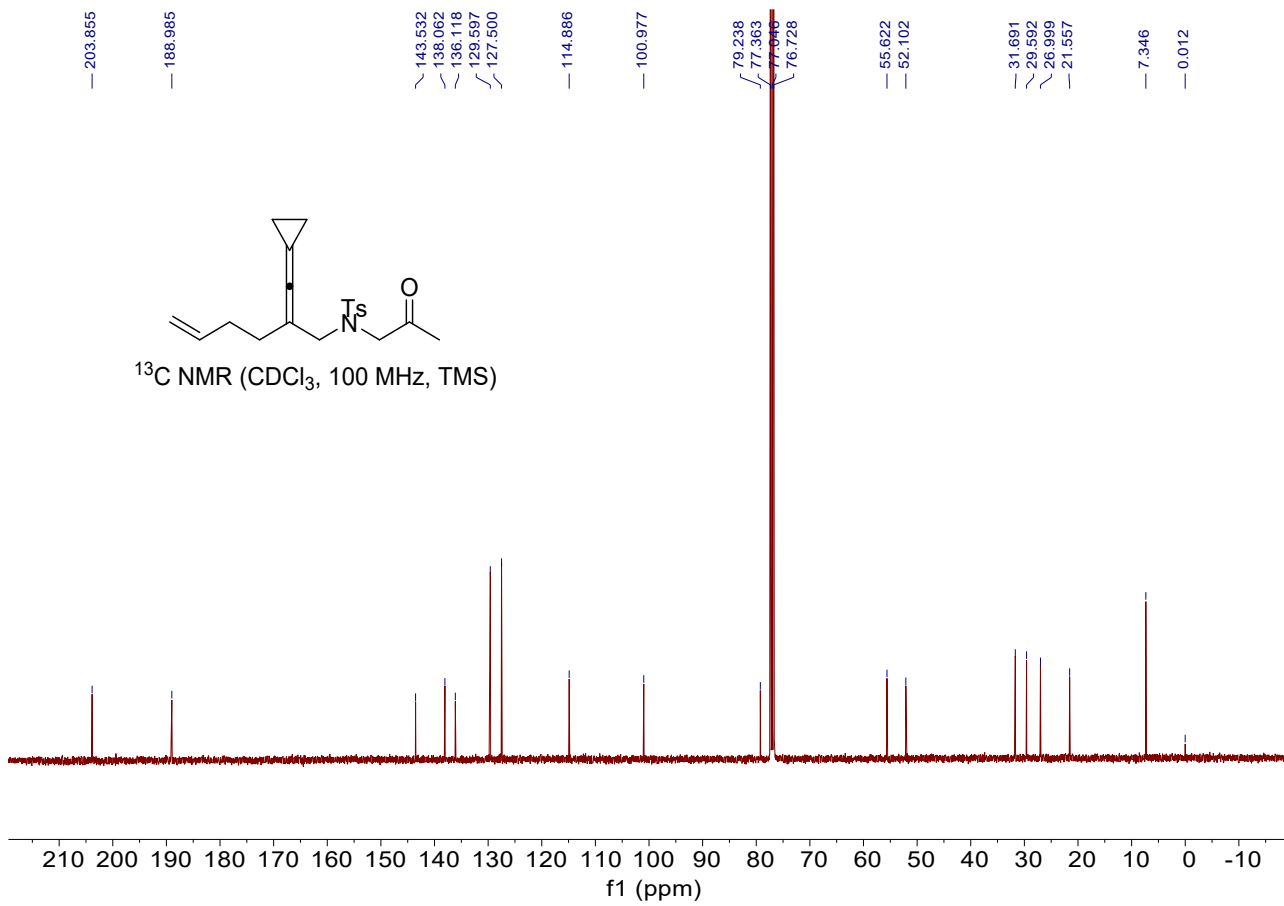

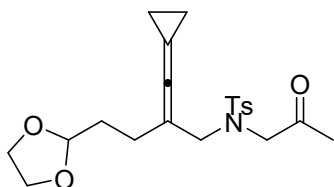

***N*-(2-(cyclopropylidene- $\lambda^5$ -methylene)-4-(1,3-dioxolan-2-yl)butyl)-4-methyl-*N*-(2-oxopropyl)benzenesulfonamide (1h)**

A yellow oil, 80% yield, 324.4 mg.  $^1\text{H}$  NMR ( $\text{CDCl}_3$ , TMS, 400 MHz)  $\delta$  7.69 (d,  $J = 8.0$  Hz, 2H), 7.32 (d,  $J = 8.0$  Hz, 2H), 4.86 (t,  $J = 4.8$  Hz, 1H), 4.00 – 3.90 (m, 4H), 3.90 – 3.77 (m, 4H), 2.42 (s, 3H), 2.21 – 2.08 (m, 5H), 1.79 – 1.69 (m, 2H), 1.48 – 1.35 (m, 4H).  $^{13}\text{C}$  NMR ( $\text{CDCl}_3$ , TMS, 100 MHz)  $\delta$  204.0, 188.5, 143.5, 136.1, 129.6, 127.5, 103.9, 101.1, 79.7, 64.9, 55.7, 52.1, 31.8, 27.0, 24.7, 21.6, 7.4. IR (neat)  $\nu$  668, 987, 1157, 1346, 1736, 2019, 2869, 2926, 2959  $\text{cm}^{-1}$ . HRMS (ESI) calcd. for  $\text{C}_{21}\text{H}_{27}\text{NO}_5\text{SNa}$  ( $\text{M}+\text{Na}$ ) $^+$ : 428.1502, Found: 428.1506.

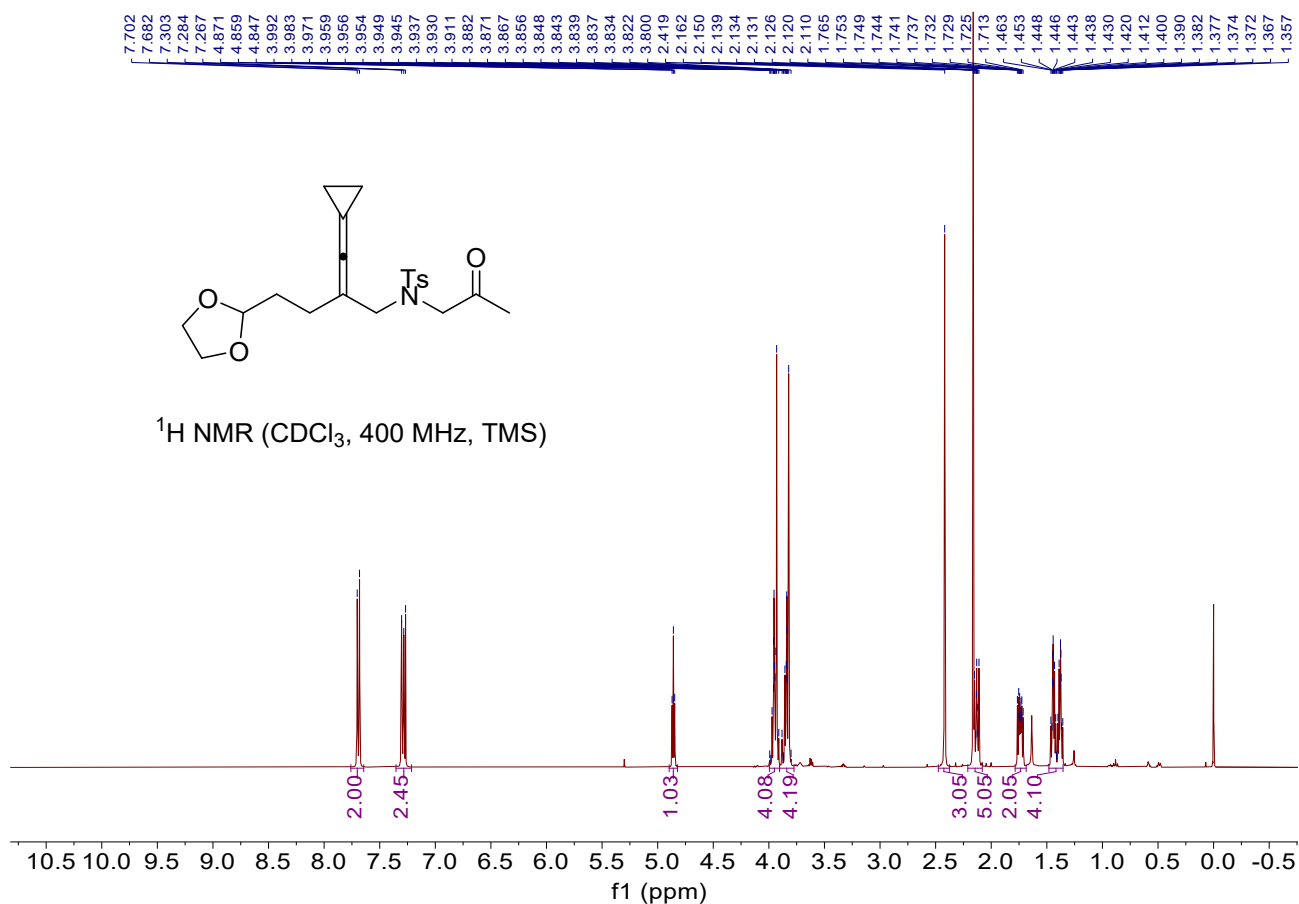

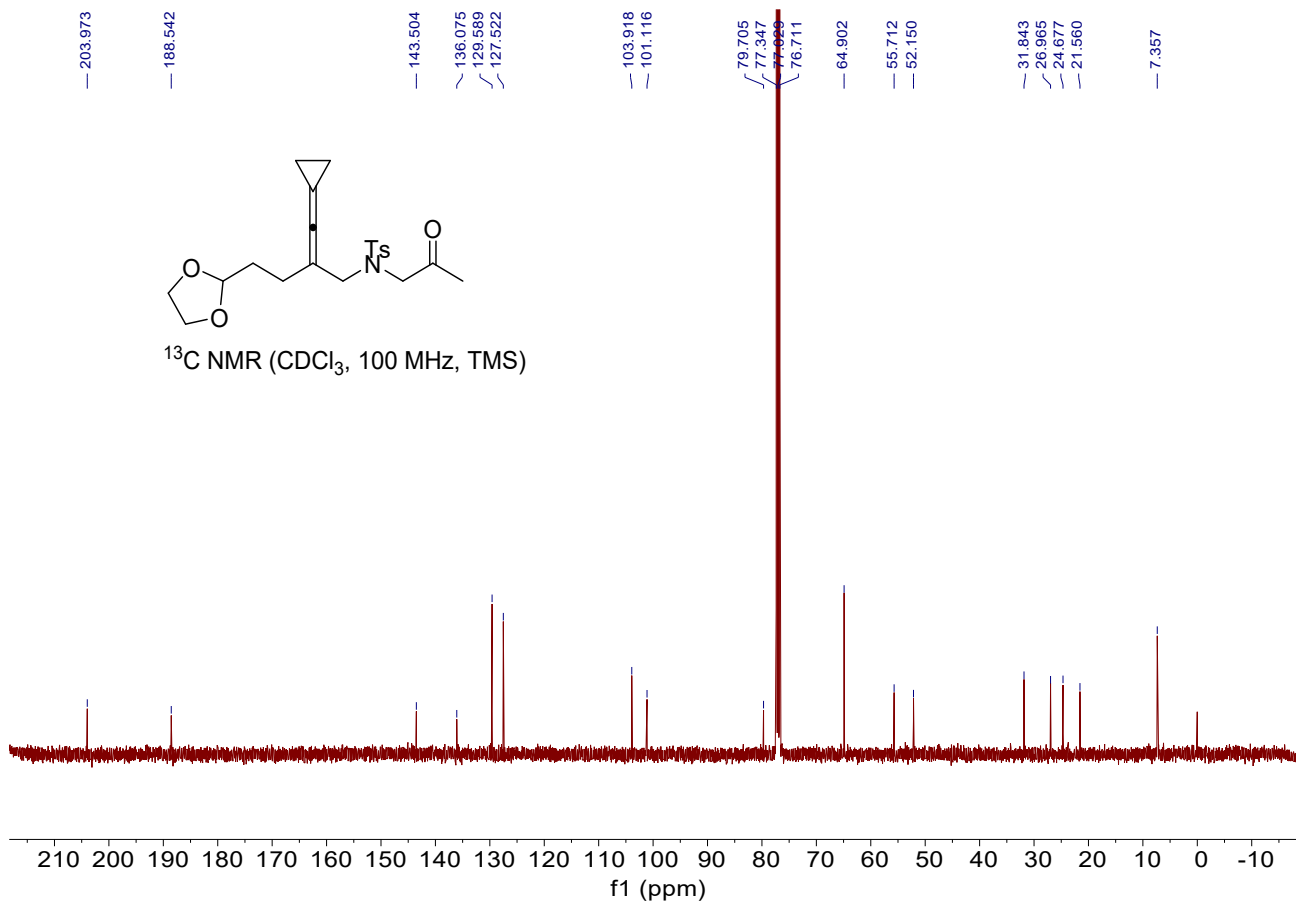

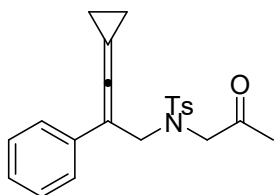

***N*-(3-cyclopropylidene-2-phenyl- $\lambda^5$ -allyl)-4-methyl-*N*-(2-oxopropyl)benzenesulfonamide (**1i**)**

A yellow oil, 90% yield, 342.9 mg.  $^1\text{H}$  NMR ( $\text{CDCl}_3$ , TMS, 400 MHz)  $\delta$  7.75 – 7.70 (m, 2H), 7.52 – 7.46 (m, 2H), 7.37 – 7.28 (m, 4H), 7.24 – 7.18 (m, 1H), 4.29 (s, 2H), 3.82 (s, 2H), 2.44 (s, 3H), 1.93 (s, 3H), 1.74 – 1.64 (m, 2H), 1.64 – 1.58 (m, 2H).  $^{13}\text{C}$  NMR ( $\text{CDCl}_3$ , TMS, 150 MHz)  $\delta$  204.9, 190.9, 143.8, 135.1, 129.7, 128.6, 127.7, 127.0, 126.2, 102.0, 80.0, 56.0, 55.6, 50.4, 26.8, 21.6, 8.8. IR (neat)  $\nu$  668, 987, 1228, 1216, 1346, 1737, 2013, 2869, 2916, 2979  $\text{cm}^{-1}$ . HRMS (ESI) calcd. for  $\text{C}_{22}\text{H}_{23}\text{NO}_3\text{SNa}$  ( $\text{M}+\text{Na}$ ) $^+$ : 404.1291, Found: 404.1298.

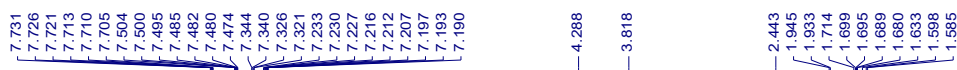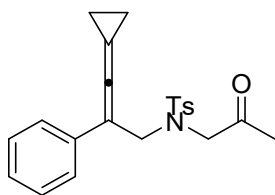

$^1\text{H}$  NMR ( $\text{CDCl}_3$ , 400 MHz, TMS)

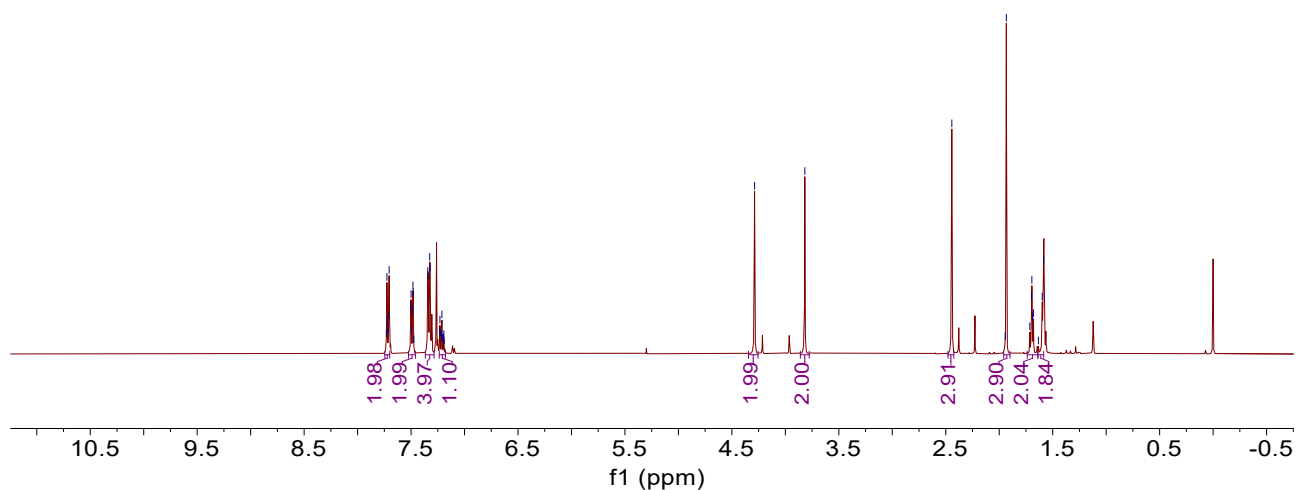

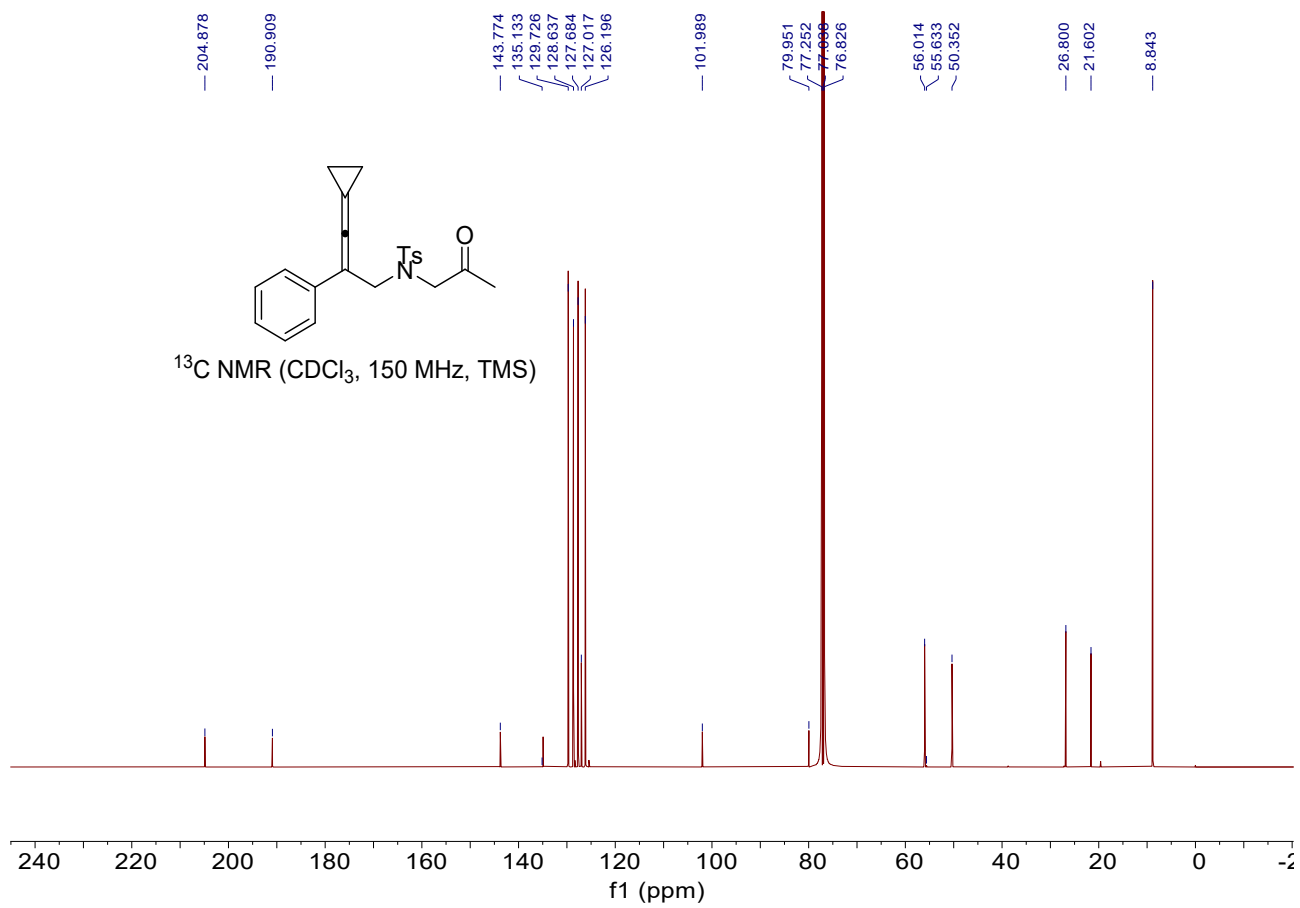

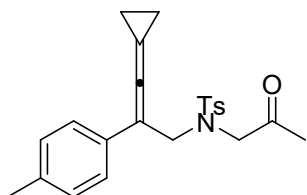

***N*-(3-cyclopropylidene-2-(*p*-tolyl)- $\lambda^5$ -allyl)-4-methyl-*N*-(2-oxopropyl)benzenesulfonamide (1j)**

A yellow oil, 88% yield, 355.5 mg.  $^1\text{H}$  NMR ( $\text{CDCl}_3$ , TMS, 400 MHz)  $\delta$  7.71 (d,  $J = 8.4$  Hz, 2H), 7.37 (d,  $J = 8.4$  Hz, 2H), 7.33 (d,  $J = 8.0$  Hz, 2H), 7.13 (d,  $J = 8.0$  Hz, 2H), 4.26 (s, 2H), 3.81 (s, 2H), 2.44 (s, 3H), 2.33 (s, 3H), 1.94 (s, 3H), 1.71 – 1.62 (m, 2H), 1.60 – 1.51 (m, 2H).  $^{13}\text{C}$  NMR ( $\text{CDCl}_3$ , TMS, 100 MHz)  $\delta$  205.0, 190.6, 143.7, 136.8, 135.0, 131.9, 129.7, 129.4, 127.7, 126.1, 101.9, 79.9, 56.0, 50.4, 26.9, 21.6, 21.2, 8.7. IR (neat)  $\nu$  655, 987, 1159, 1350, 1737, 2008, 2869, 2932, 2959  $\text{cm}^{-1}$ . HRMS (ESI) calcd. for  $\text{C}_{23}\text{H}_{25}\text{NO}_3\text{SNa}$  ( $\text{M}+\text{Na}$ ) $^+$ : 418.1447, Found: 418.1455.

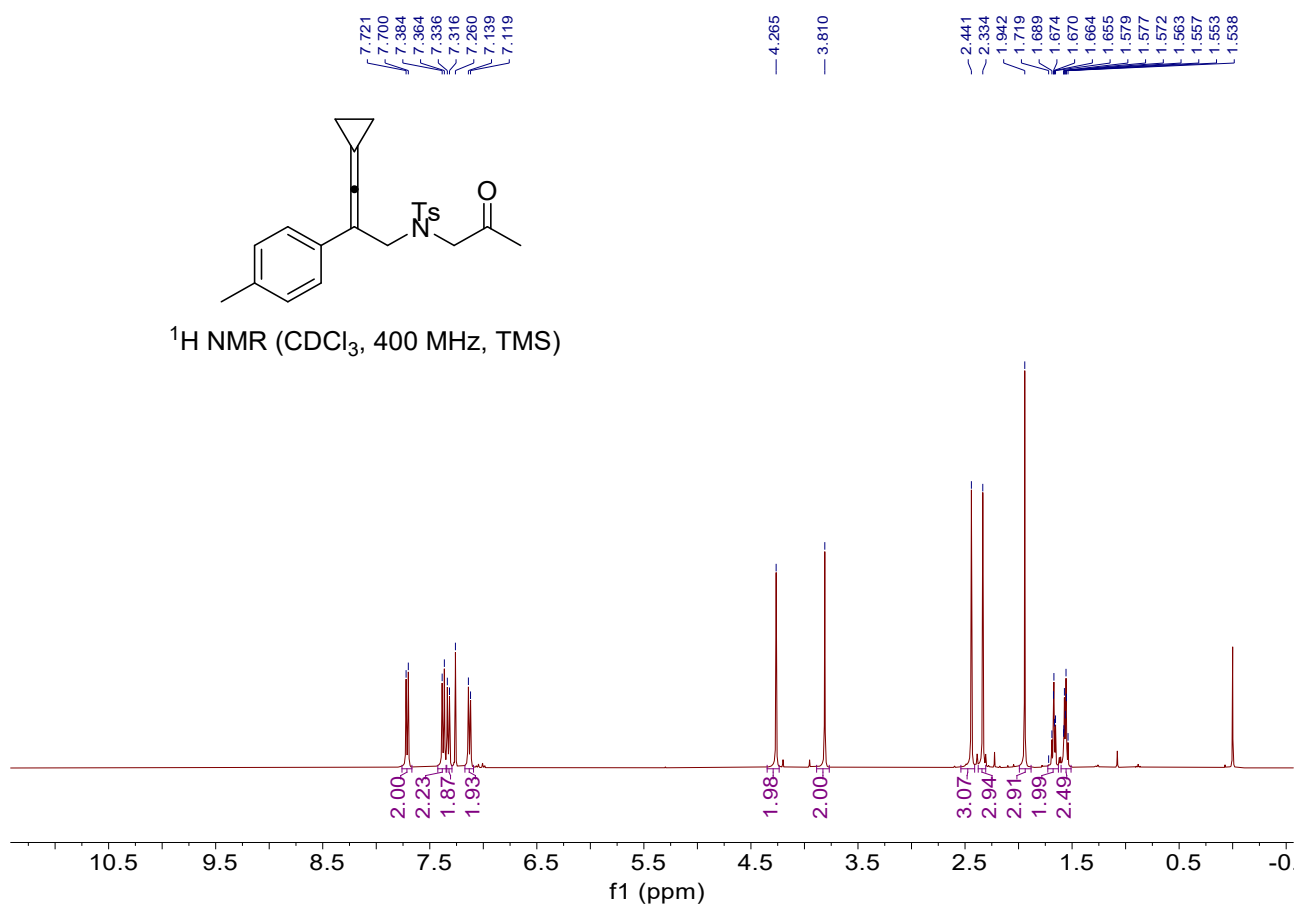

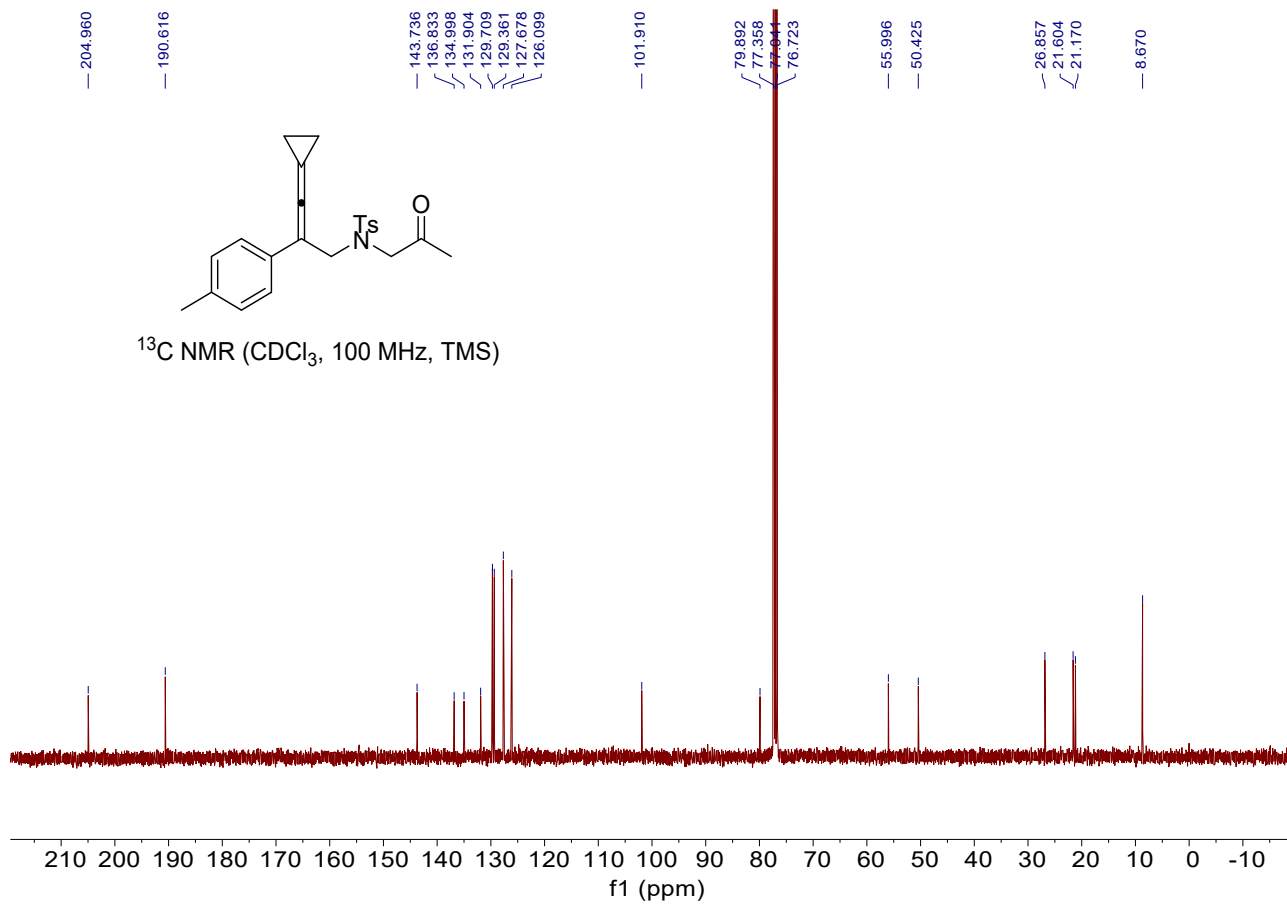

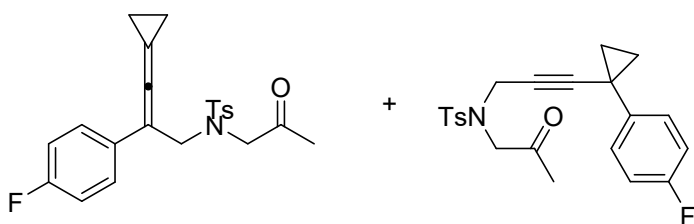

***N*-(3-cyclopropylidene-2-(4-fluorophenyl)- $\lambda^5$ -allyl)-4-methyl-*N*-(2-oxopropyl)benzenesulfonamide (1k+1k' = 1.5: 1)**

A colorless oil, 60% yield, 240.4 mg.  $^1\text{H}$  NMR ( $\text{CDCl}_3$ , TMS, 400 MHz)  $\delta$  7.75 – 7.67 (m, 3H), 7.53 – 7.42 (m, 2H), 7.38 – 7.31 (m, 2H), 7.11 – 6.97 (m, 3H), 6.98 – 6.85 (m, 1H), 4.25 (s, 2H), 4.19 (s, 1H), 3.95 (s, 1H), 3.81 (s, 2H), 2.44 (s, 3H), 2.39 (s, 2H), 2.23 (s, 2H), 1.94 (s, 3H), 1.75 – 1.65 (m, 2H), 1.62 – 1.56 (m, 2H), 1.15 – 1.03 (m, 2H).  $^{13}\text{C}$  NMR ( $\text{CDCl}_3$ , TMS, 100 MHz)  $\delta$  204.6, 203.8, 190.7, 190.7, 162.7, 162.2, 161.1, 160.6, 143.9, 143.9, 136.8, 136.8, 135.4, 134.9, 130.9, 130.9, 129.8, 129.7, 127.9, 127.8, 127.7, 127.6, 127.4, 127.3, 115.6, 115.5, 115.2, 115.1, 101.1, 80.2, 56.0, 55.7, 50.6, 38.7, 27.1, 26.8, 26.6, 21.6, 21.5, 19.3, 8.8.  $^{19}\text{F}$  NMR (564 MHz,  $\text{CDCl}_3$ )  $\delta$  -115.2, -116.5. IR (neat)  $\nu$  668, 987, 1157, 1216, 1346, 1734, 2008, 2829, 2926, 2950  $\text{cm}^{-1}$ . HRMS (ESI) calcd. for  $\text{C}_{22}\text{H}_{22}\text{NO}_3\text{FSNa}$  ( $\text{M}+\text{Na}$ ) $^+$ : 422.1197, Found: 422.1193.

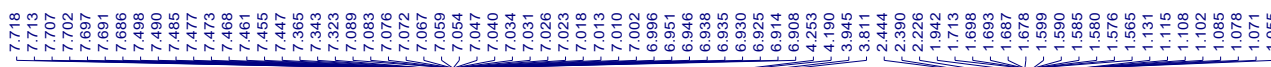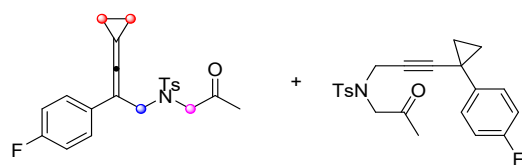

$^1\text{H}$  NMR ( $\text{CDCl}_3$ , 400 MHz, TMS)

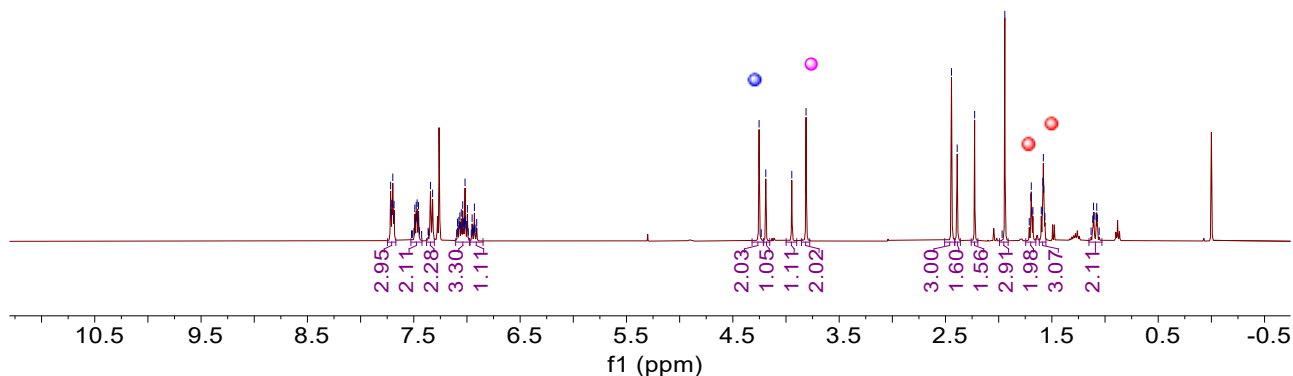



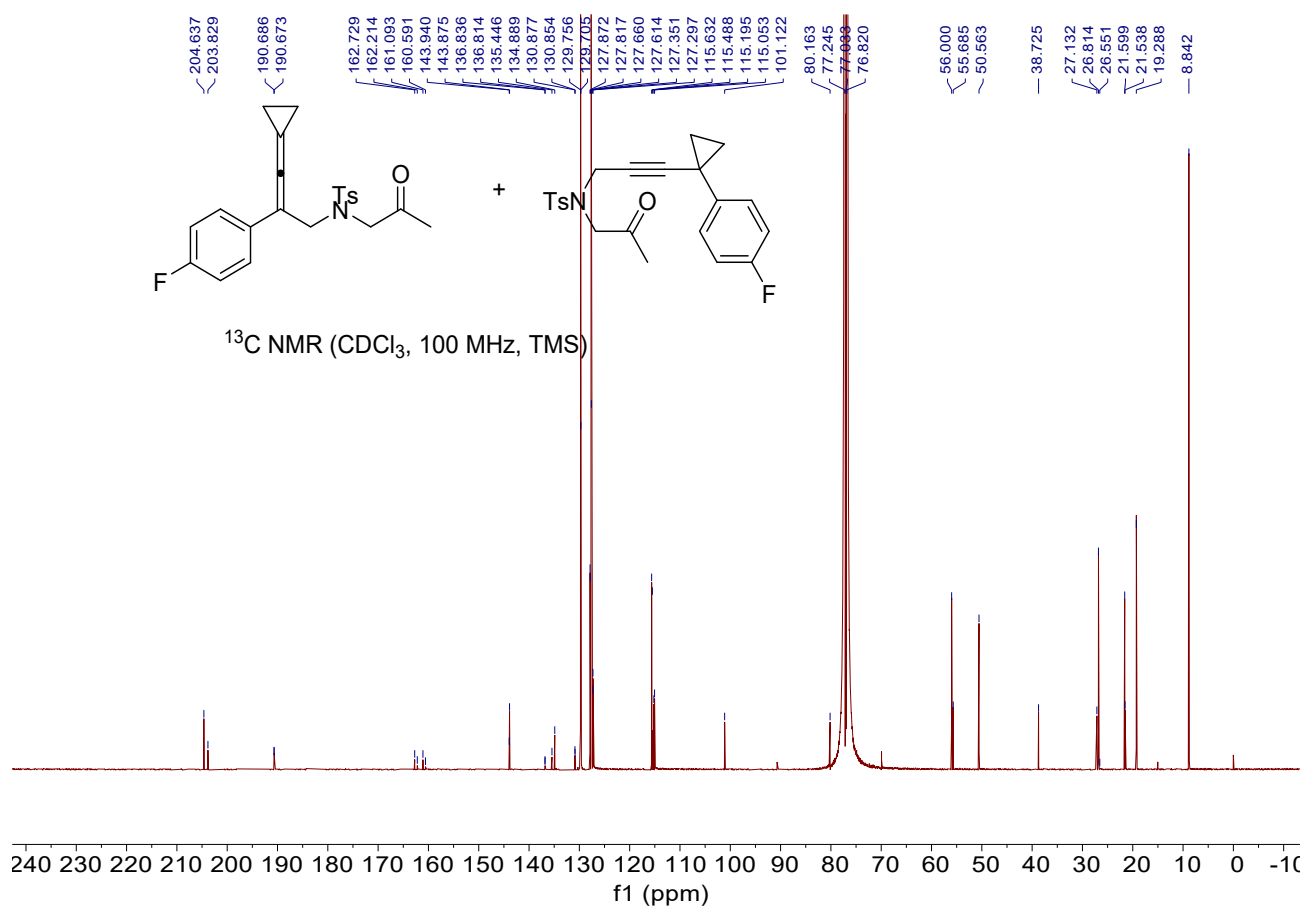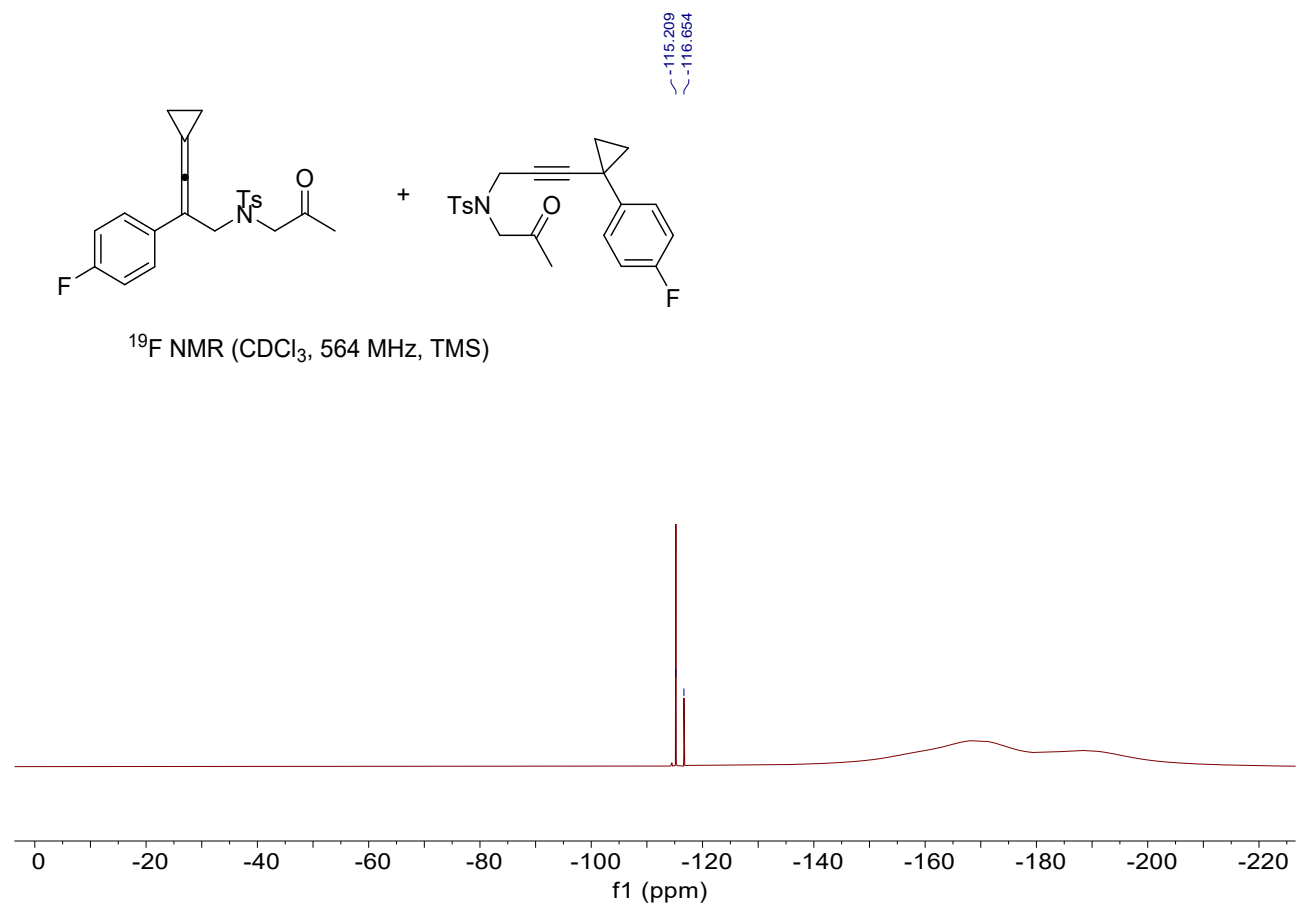

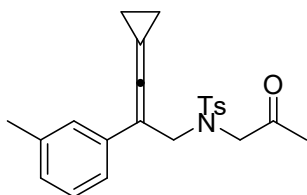

**N-(3-cyclopropylidene-2-(m-tolyl)-λ<sup>5</sup>-allyl)-4-methyl-N-(2-oxopropyl)benzenesulfonamide (11)**

A yellow oil, 90% yield, 355.4 mg. <sup>1</sup>H NMR (CDCl<sub>3</sub>, TMS, 400 MHz) δ 7.71 (d, *J* = 8.4 Hz, 2H), 7.34 – 7.18 (m, 6H), 7.08 – 6.99 (m, 1H), 4.28 (s, 2H), 3.83 (s, 2H), 2.44 (s, 3H), 2.33 (s, 3H), 1.95 (s, 3H), 1.73 – 1.63 (m, 2H), 1.63 – 1.54 (m, 2H). <sup>13</sup>C NMR (CDCl<sub>3</sub>, TMS, 100 MHz) δ 204.9, 190.8, 143.7, 138.2, 135.2, 134.8, 129.7, 128.6, 127.9, 127.7, 126.9, 123.3, 102.0, 79.9, 56.0, 50.3, 26.8, 21.6, 21.5, 8.8. IR (neat) ν 655, 987, 1157, 1350, 1737, 2008, 2929, 2966 cm<sup>-1</sup>. HRMS (ESI) calcd. for C<sub>23</sub>H<sub>25</sub>NO<sub>3</sub>SNa (M+Na)<sup>+</sup>: 418.1447, Found: 418.1445.

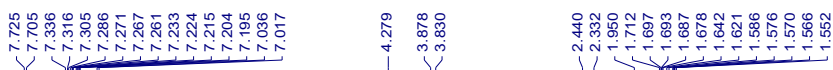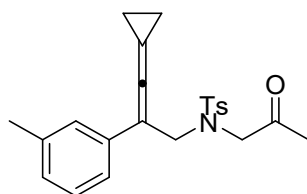

<sup>1</sup>H NMR (CDCl<sub>3</sub>, 400 MHz, TMS)

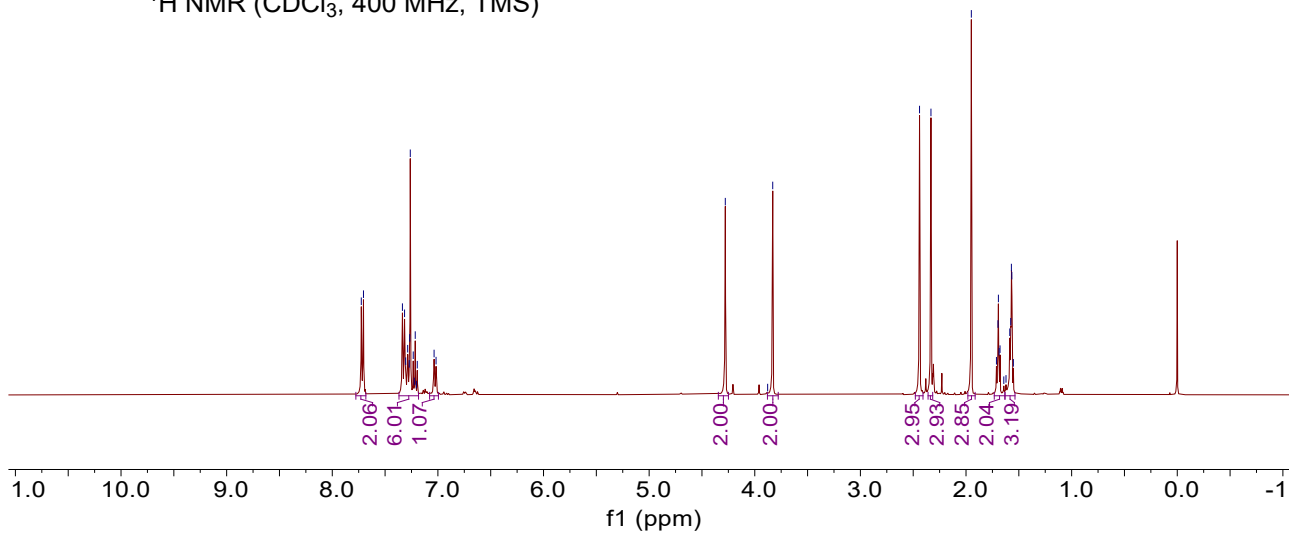

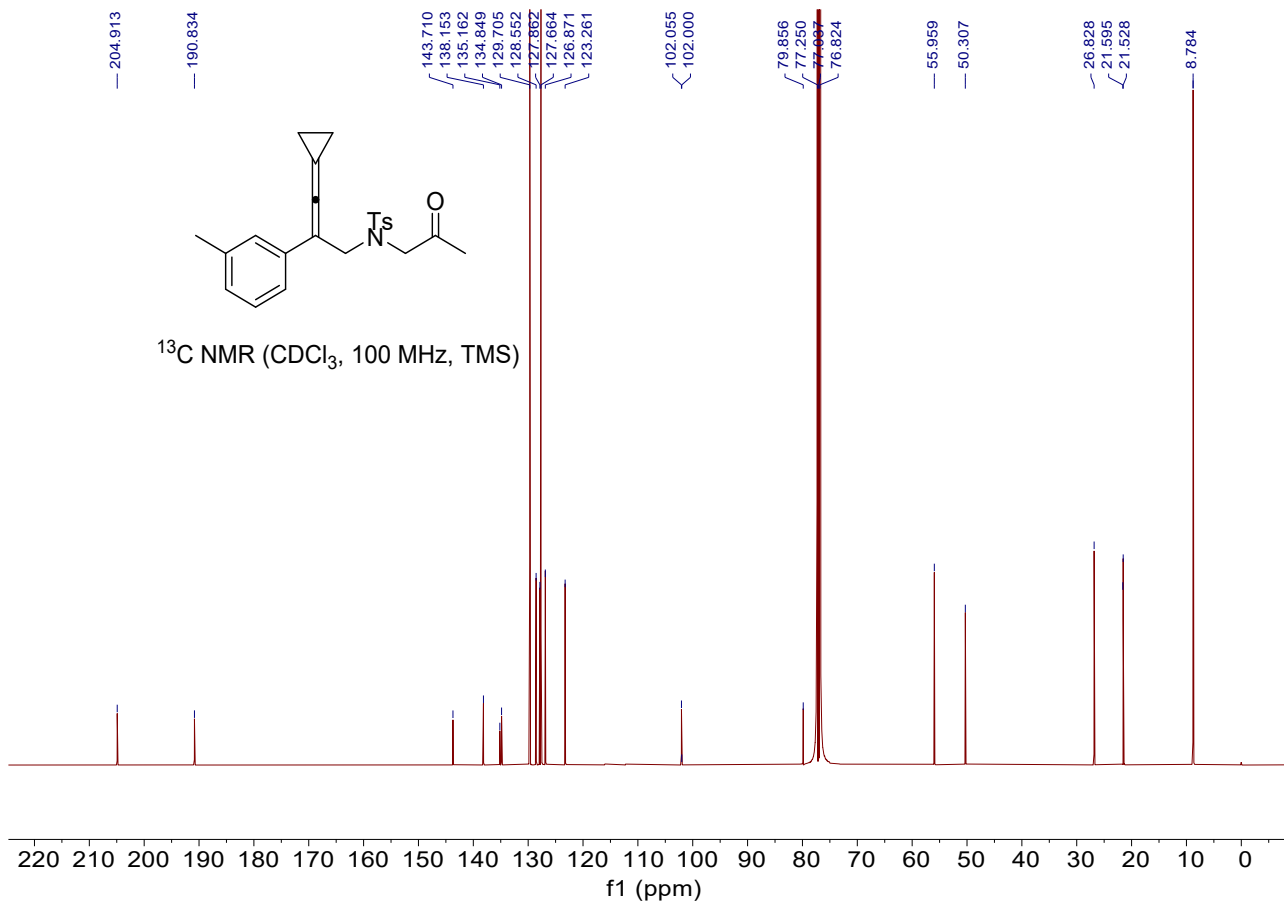

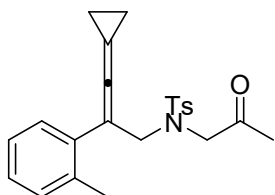

***N*-(3-cyclopropylidene-2-(*o*-tolyl)- $\lambda^5$ -allyl)-4-methyl-*N*-(2-oxopropyl)benzenesulfonamide (1m)**

A red oil, 89% yield, 355.0 mg.  $^1\text{H}$  NMR ( $\text{CDCl}_3$ , TMS, 400 MHz) 7.63 (d,  $J = 8.4$  Hz, 2H), 7.31 – 7.22 (m, 2H), 7.19 – 7.06 (m, 4H), 4.28 (s, 2H), 3.88 (s, 2H), 2.42 (s, 3H), 2.25 (s, 3H), 1.99 (s, 3H), 1.54 – 1.48 (m, 4H).  $^{13}\text{C}$  NMR ( $\text{CDCl}_3$ , TMS, 100 MHz)  $\delta$  204.6, 191.07, 191.06, 143.5, 136.2, 135.7, 134.6, 131.0, 129.6, 127.7, 127.5, 127.3, 126.2, 101.1, 78.9, 55.8, 52.0, 26.7, 21.6, 20.8, 7.9. IR (neat)  $\nu$  668, 987, 1157, 1348, 1737, 2017, 2969, 3026  $\text{cm}^{-1}$ . HRMS (ESI) calcd. for  $\text{C}_{23}\text{H}_{25}\text{NO}_3\text{SNa}$  ( $\text{M}+\text{Na}$ ) $^+$ : 418.1447, Found: 418.1442.

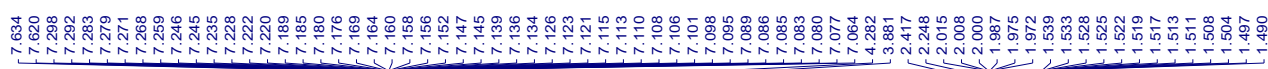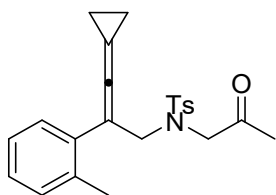

$^1\text{H}$  NMR ( $\text{CDCl}_3$ , 600 MHz, TMS)

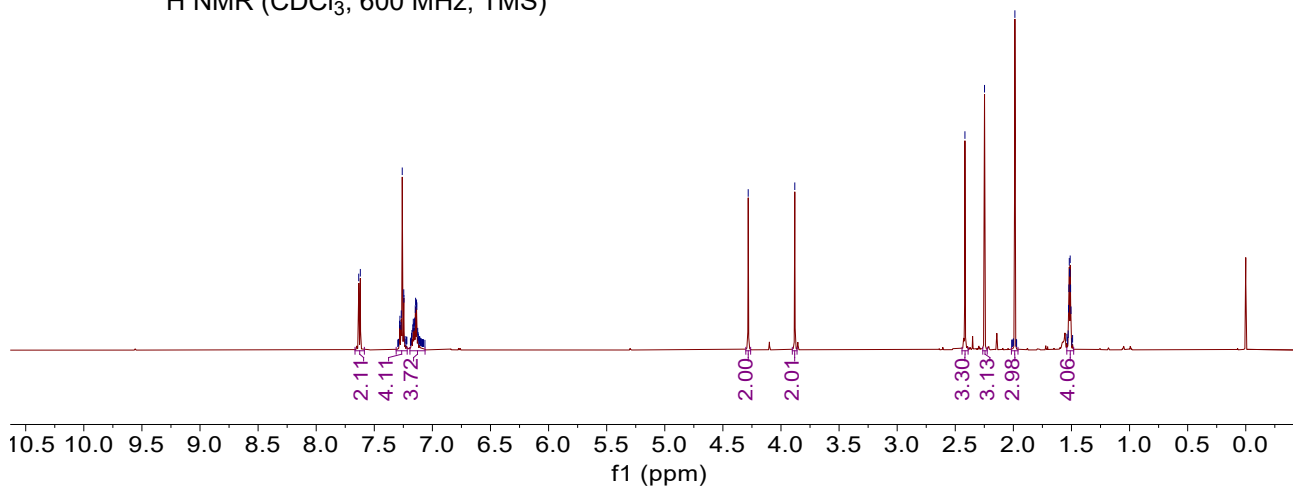

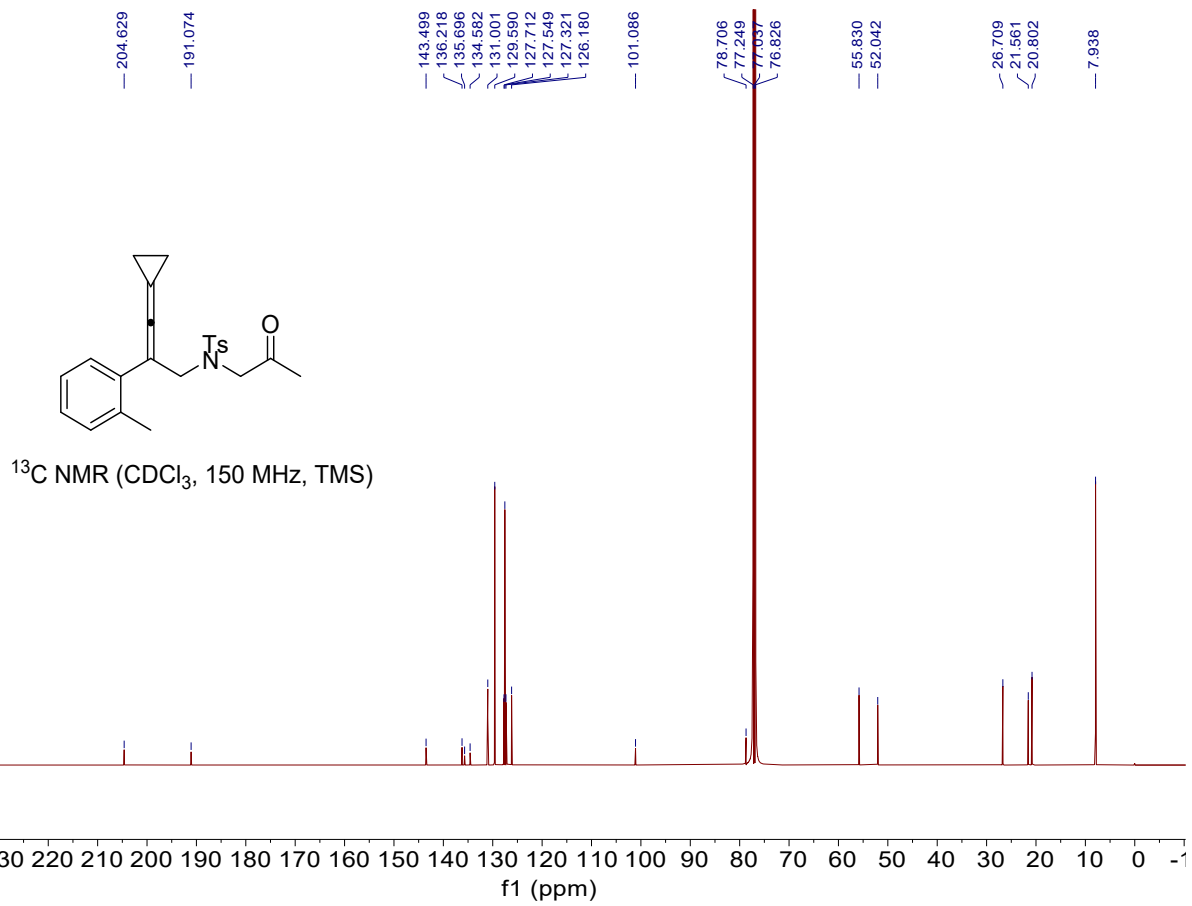

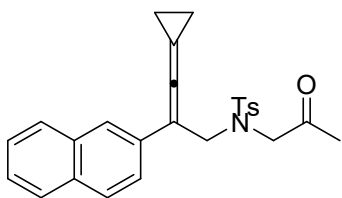

***N*-(3-cyclopropylidene-2-(naphthalen-2-yl)-λ<sup>5</sup>-allyl)-4-methyl-*N*-(2-oxopropyl)benzenesulfonamide (1n)**

A red oil, 91% yield, 388.4 mg. <sup>1</sup>H NMR (CDCl<sub>3</sub>, TMS, 400 MHz) δ 7.99 (s, 1H), 7.86 – 7.71 (m, 5H), 7.56 – 7.50 (m, 1H), 7.49 – 7.41 (m, 2H), 7.33 (d, *J* = 8.0 Hz, 2H), 4.41 (s, 2H), 3.88 (s, 2H), 2.45 (s, 3H), 1.93 (s, 3H), 1.78 – 1.73 (m, 2H), 1.66 – 1.60 (m, 2H). <sup>13</sup>C NMR (CDCl<sub>3</sub>, TMS, 100 MHz) δ 204.8, 191.4, 143.8, 135.2, 133.6, 132.4, 132.3, 129.8, 128.4, 128.0, 127.7, 127.5, 126.2, 125.9, 125.0, 124.2, 102.2, 80.2, 56.1, 50.4, 26.9, 21.6, 9.1. IR (neat) ν 668, 987, 1219, 1359, 1757, 2003, 2926, 2959 cm<sup>-1</sup>. HRMS (ESI) calcd. for C<sub>26</sub>H<sub>25</sub>NO<sub>3</sub>SNa (M+Na)<sup>+</sup>: 454.1447, Found: 454.1455.

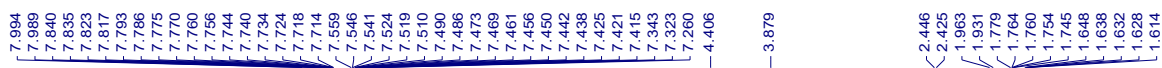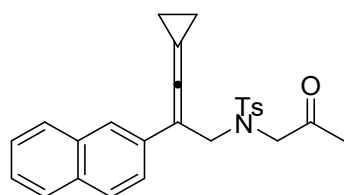

<sup>1</sup>H NMR (CDCl<sub>3</sub>, 400 MHz, TMS)

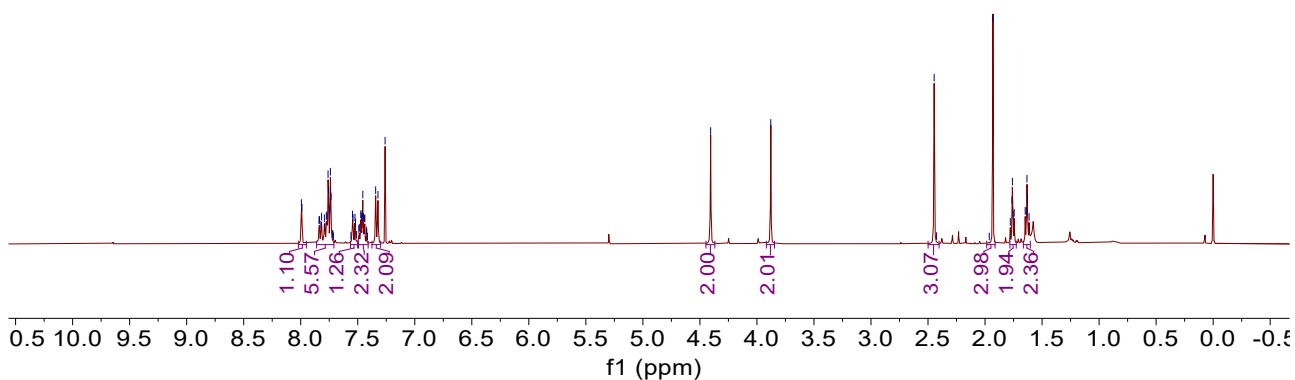

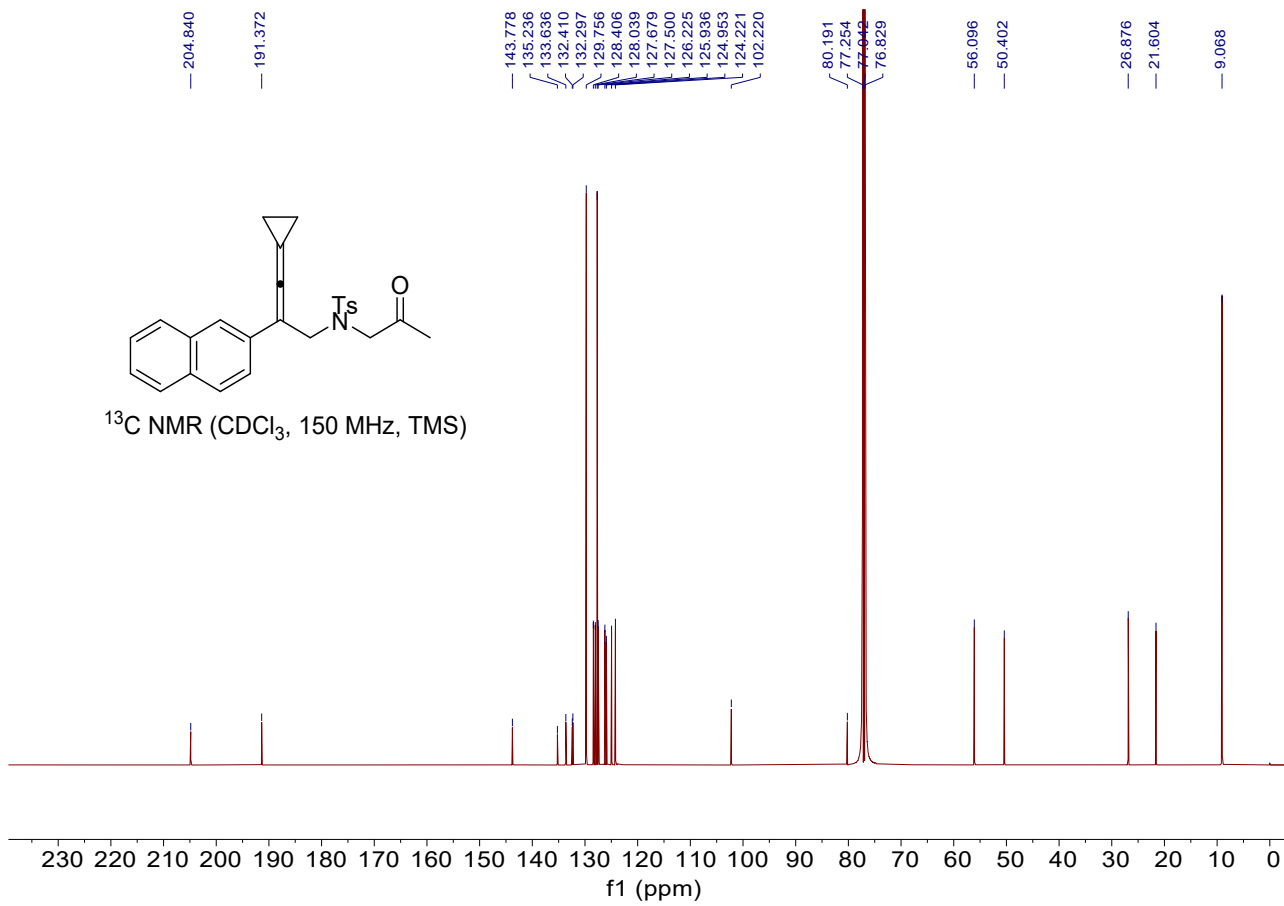

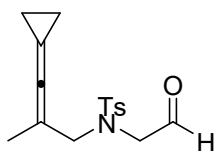

***N*-(3-cyclopropylidene-2-methyl-λ<sup>5</sup>-allyl)-4-methyl-*N*-(2-oxoethyl)benzenesulfonamide (1o)**

A colorless oil, 60% yield, 183.4 mg. <sup>1</sup>H NMR (CDCl<sub>3</sub>, TMS, 600 MHz) δ 9.58 (t, *J* = 1.6 Hz, 1H), 7.69 (d, *J* = 8.0 Hz, 2H), 7.33 (d, *J* = 8.0 Hz, 2H), 3.76 (s, 2H), 3.72 (d, *J* = 1.6 Hz, 2H), 2.43 (s, 3H), 1.78 (s, 3H), 1.48 – 1.36 (m, 4H). <sup>13</sup>C NMR (CDCl<sub>3</sub>, TMS, 100 MHz) δ 202.8, 187.6, 139.8, 128.9, 128.2, 126.1, 105.6, 78.7, 43.4, 40.5, 31.4, 20.1, 6.8. IR (neat) ν 668, 987, 1157, 1346, 1737, 2021, 2839, 2926, 2989 cm<sup>-1</sup>. HRMS (ESI) calcd. for C<sub>16</sub>H<sub>19</sub>NO<sub>3</sub>SNa (M+Na)<sup>+</sup>: 328.0978, Found: 328.0979.

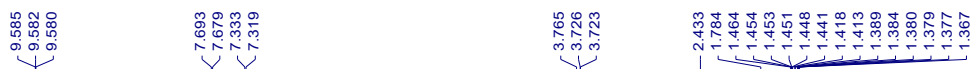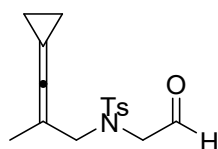

<sup>1</sup>H NMR (CDCl<sub>3</sub>, 600 MHz, TMS)

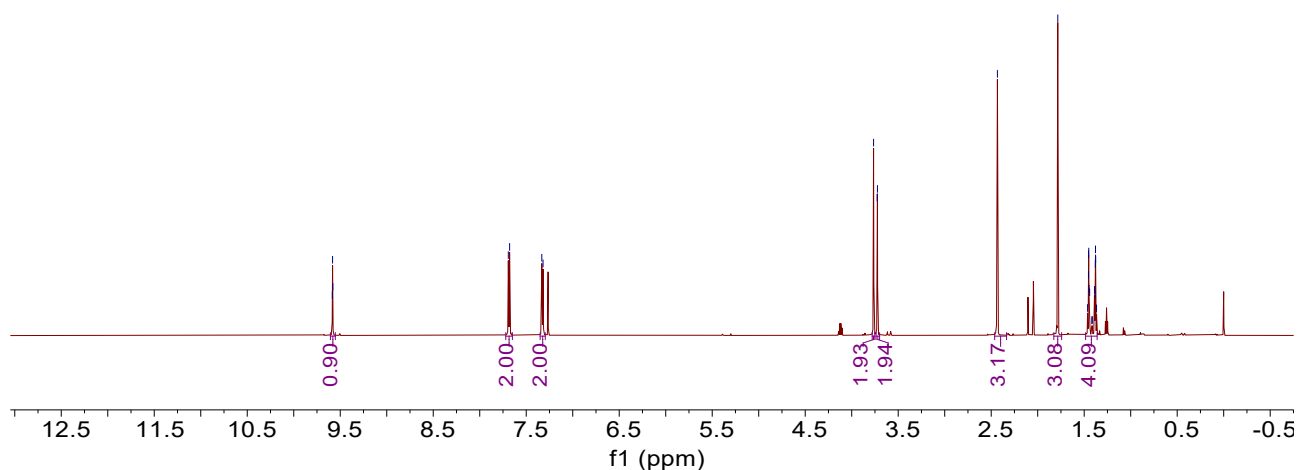



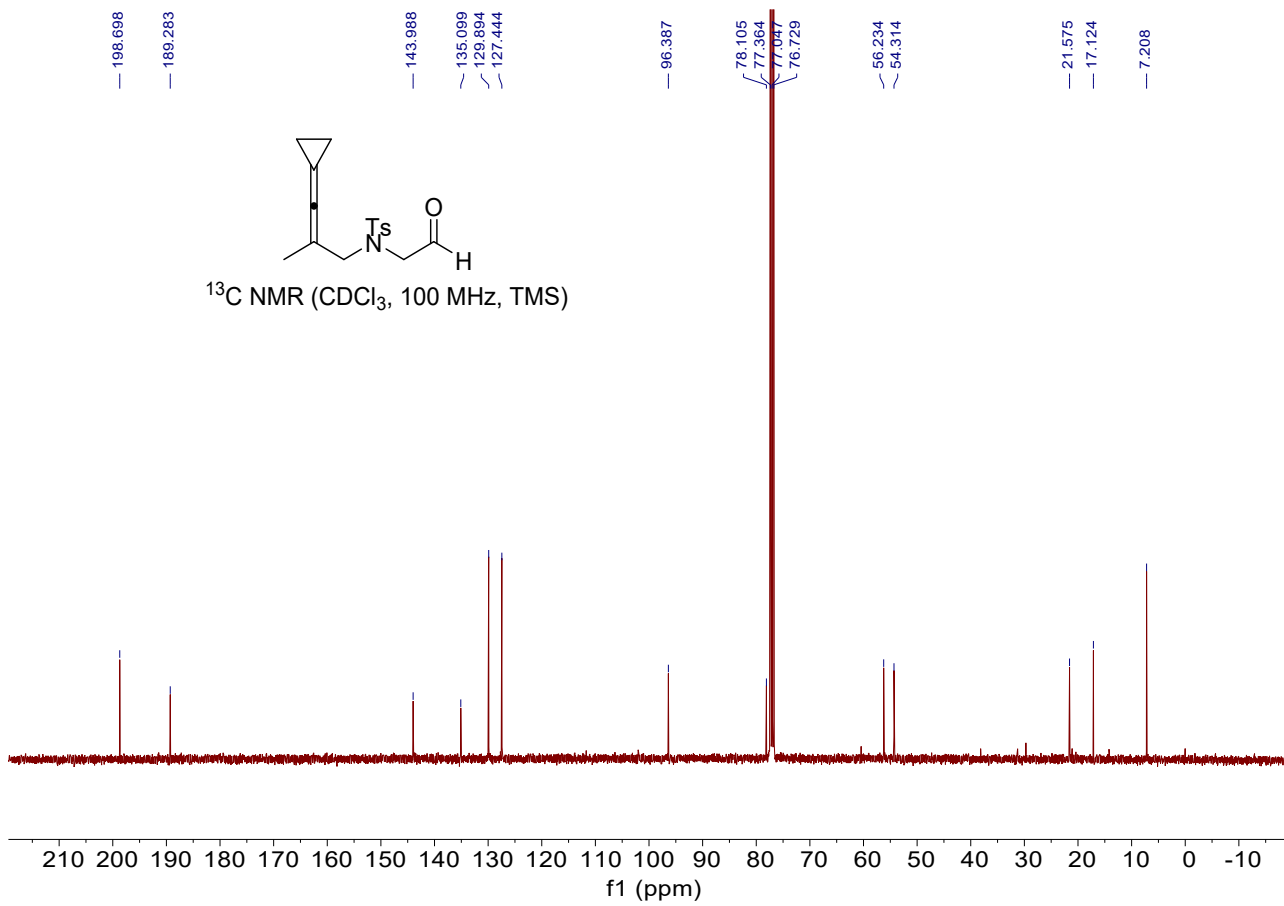

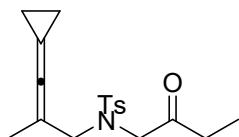

***N*-(3-cyclopropylidene-2-methyl-λ<sup>5</sup>-allyl)-4-methyl-*N*-(2-oxobutyl)benzenesulfonamide (1p)**

A colorless oil, 92% yield, 300.0 mg. <sup>1</sup>H NMR (CDCl<sub>3</sub>, TMS, 400 MHz) δ 7.71 (d, *J* = 8.4 Hz, 2H), 7.30 (d, *J* = 8.4 Hz, 2H), 3.97 (s, 2H), 3.79 (s, 2H), 2.49 (q, *J* = 7.2 Hz, 2H), 2.42 (s, 3H), 1.72 (s, 3H), 1.45 – 1.40 (m, 2H), 1.39 – 1.33 (m, 2H), 1.04 (t, *J* = 7.2 Hz, 3H). <sup>13</sup>C NMR (CDCl<sub>3</sub>, TMS, 150 MHz) δ 206.4, 189.2, 143.4, 136.3, 129.6, 127.5, 96.7, 77.7, 54.6, 53.1, 32.7, 21.6, 17.1, 7.5, 7.1. IR (neat) ν 667, 987, 1157, 1339, 1732, 2022, 2906, 2979 cm<sup>-1</sup>. HRMS (ESI) calcd. for C<sub>18</sub>H<sub>23</sub>NO<sub>3</sub>SNa (M+Na)<sup>+</sup>: 356.1291, Found: 356.1285.

7.717  
7.696  
7.305  
7.285  
7.264

3.972  
3.795

2.515  
2.497  
2.479  
2.461  
2.444  
2.421  
1.721  
1.453  
1.440  
1.438  
1.436  
1.433  
1.428  
1.420  
1.370  
1.362  
1.357  
1.354  
1.351  
1.349  
1.060  
1.041  
1.023

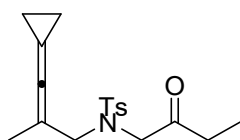

<sup>1</sup>H NMR (CDCl<sub>3</sub>, 400 MHz, TMS)

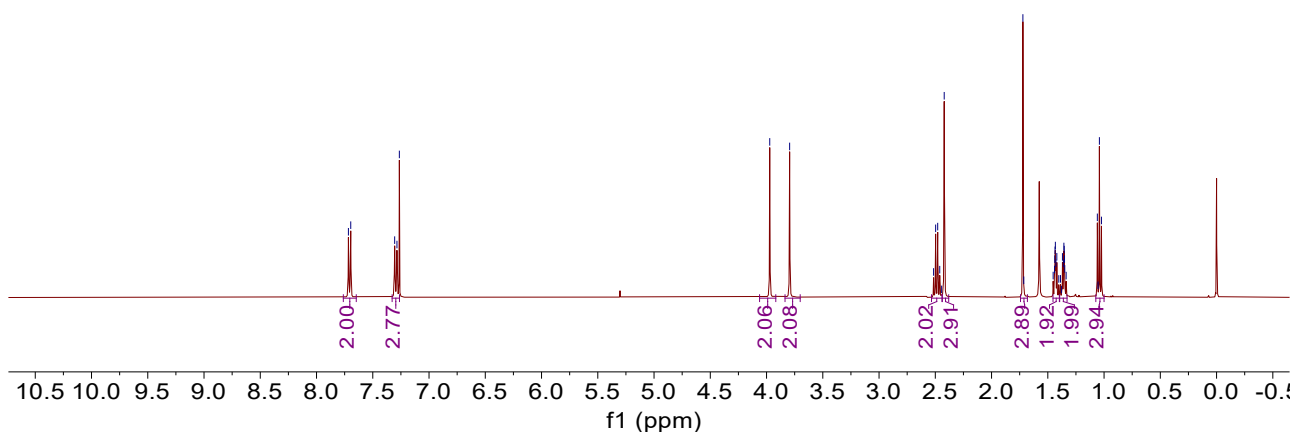

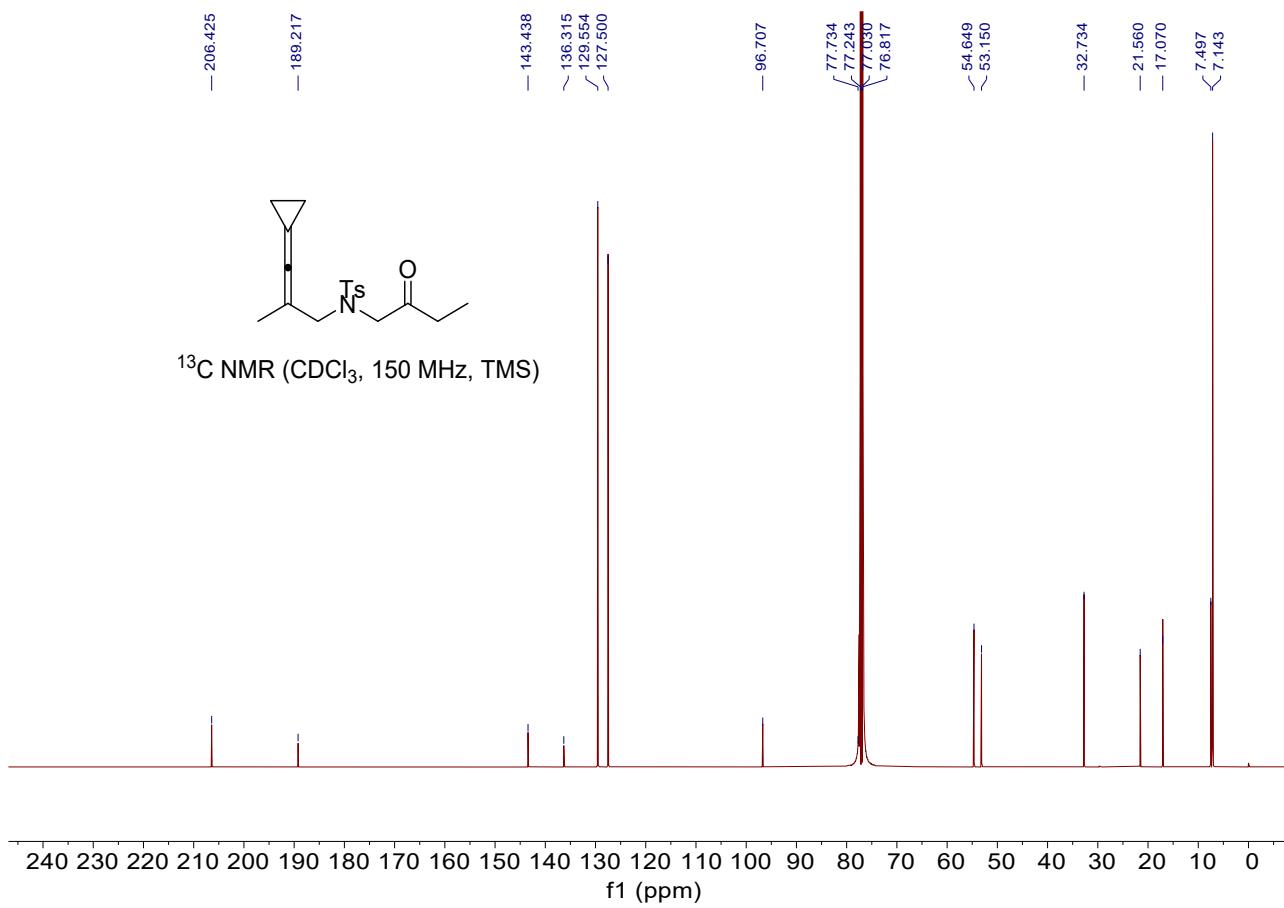

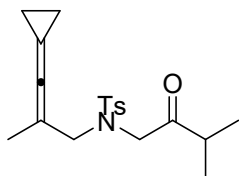

***N*-(3-cyclopropylidene-2-methyl-λ<sup>5</sup>-allyl)-4-methyl-*N*-(3-methyl-2-oxobutyl)benzenesulfonamide (1q)**

A colorless oil, 80% yield, 277.6 mg. <sup>1</sup>H NMR (CDCl<sub>3</sub>, TMS, 400 MHz) δ 7.71 (d, *J* = 8.0 Hz, 2H), 7.28 (d, *J* = 8.0 Hz, 2H), 4.14 (s, 2H), 3.83 (s, 2H), 2.71 (hept, *J* = 7.0 Hz, 1H), 2.42 (s, 3H), 1.72 (s, 3H), 1.46 – 1.33 (m, 4H), 1.06 (d, *J* = 7.0 Hz, 6H). <sup>13</sup>C NMR (CDCl<sub>3</sub>, TMS, 100 MHz) δ 208.9, 189.2, 143.3, 136.8, 129.5, 127.5, 96.8, 77.4, 52.58, 52.56, 37.6, 21.6, 18.1, 16.9, 7.1. IR (neat) ν 660, 987, 1157, 1346, 1730, 2024, 2869, 2934, 2970 cm<sup>-1</sup>. HRMS (ESI) calcd. for C<sub>19</sub>H<sub>25</sub>NO<sub>3</sub>SNa (M+Na)<sup>+</sup>: 370.1447, Found: 370.1441.

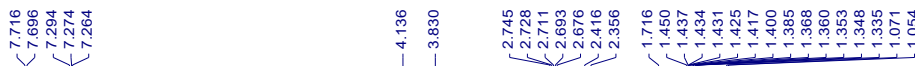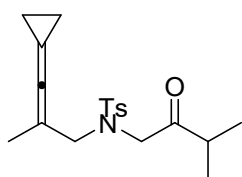

<sup>1</sup>H NMR (CDCl<sub>3</sub>, 400 MHz, TMS)

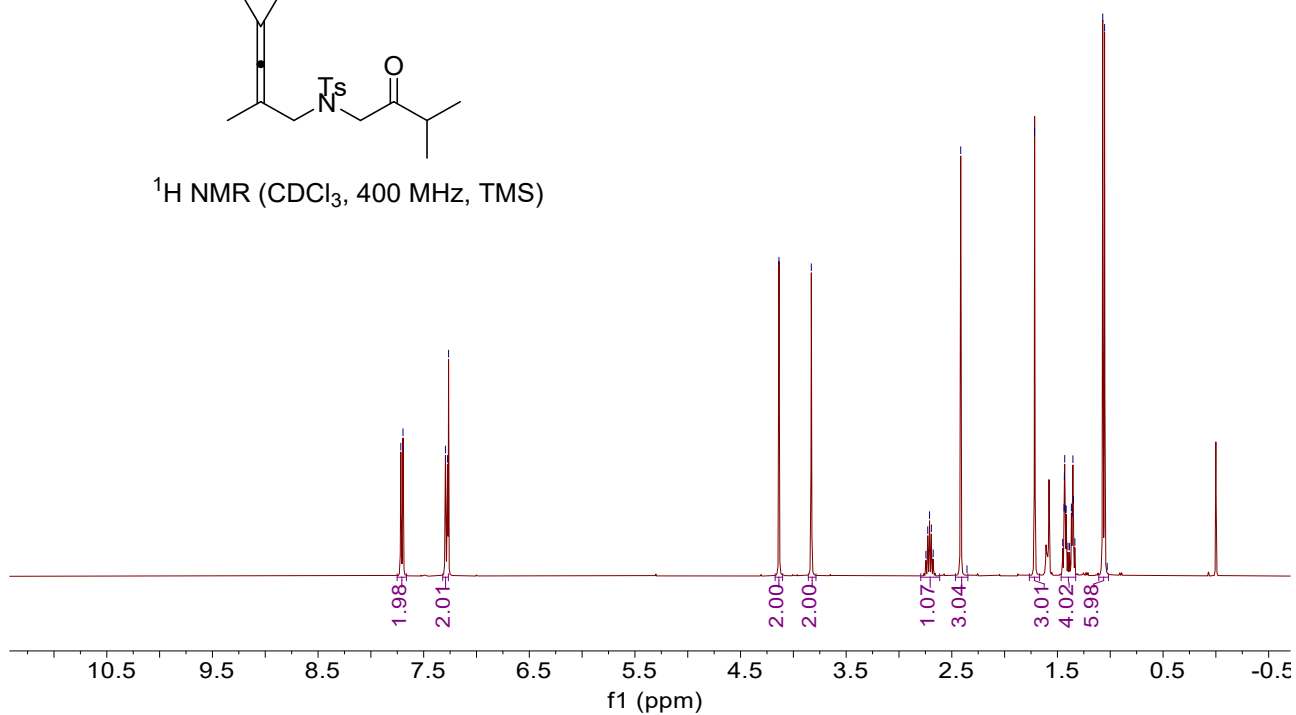

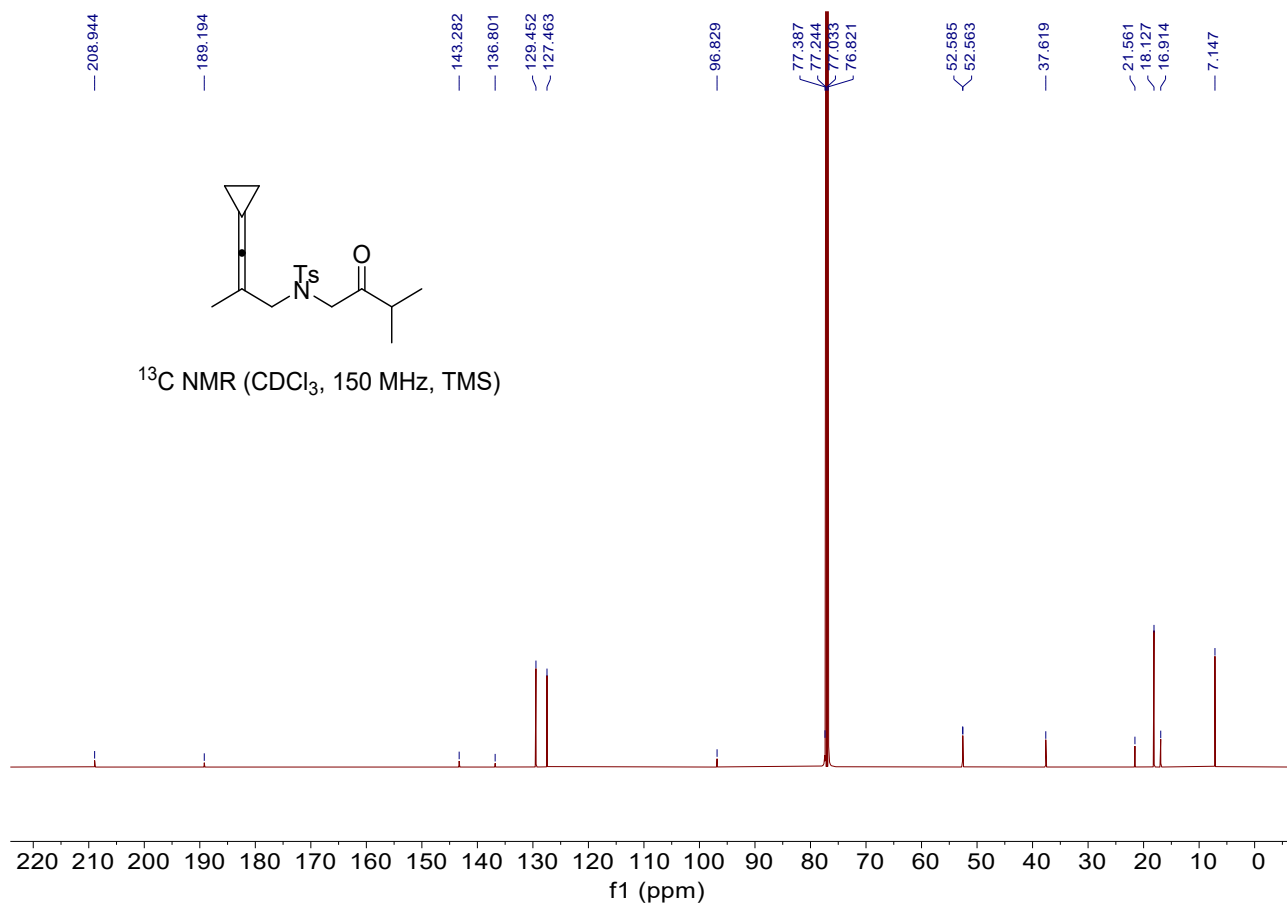

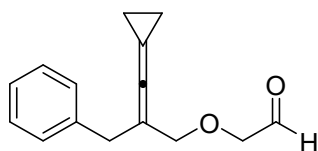

### 2-((2-benzyl-3-cyclopropylidene- $\lambda^5$ -allyl)oxy)acetaldehyde (**1ad**)

A colorless oil, 60% yield, 136.4 mg.  $^1\text{H}$  NMR ( $\text{CDCl}_3$ , TMS, 600 MHz)  $\delta$  9.68 (t,  $J = 1.0$  Hz, 1H), 7.30 – 7.15 (m, 5H), 4.09 (s, 2H), 4.02 (d,  $J = 1.0$  Hz, 2H), 3.45 (s, 2H), 1.54 – 1.43 (m, 4H).  $^{13}\text{C}$  NMR ( $\text{CDCl}_3$ , TMS, 100 MHz)  $\delta$  201.1, 189.4, 139.3, 129.0, 128.3, 126.3, 102.0, 78.2, 74.8, 72.4, 37.1, 7.7. IR (neat)  $\nu$  668, 987, 1228, 1737, 2022, 2924, 2976, 3026  $\text{cm}^{-1}$ . HRMS (ESI) calcd. for  $\text{C}_{15}\text{H}_{16}\text{O}_2\text{SNa}$  ( $\text{M}+\text{Na}$ ) $^+$ : 251.1042, Found: 251.1035.

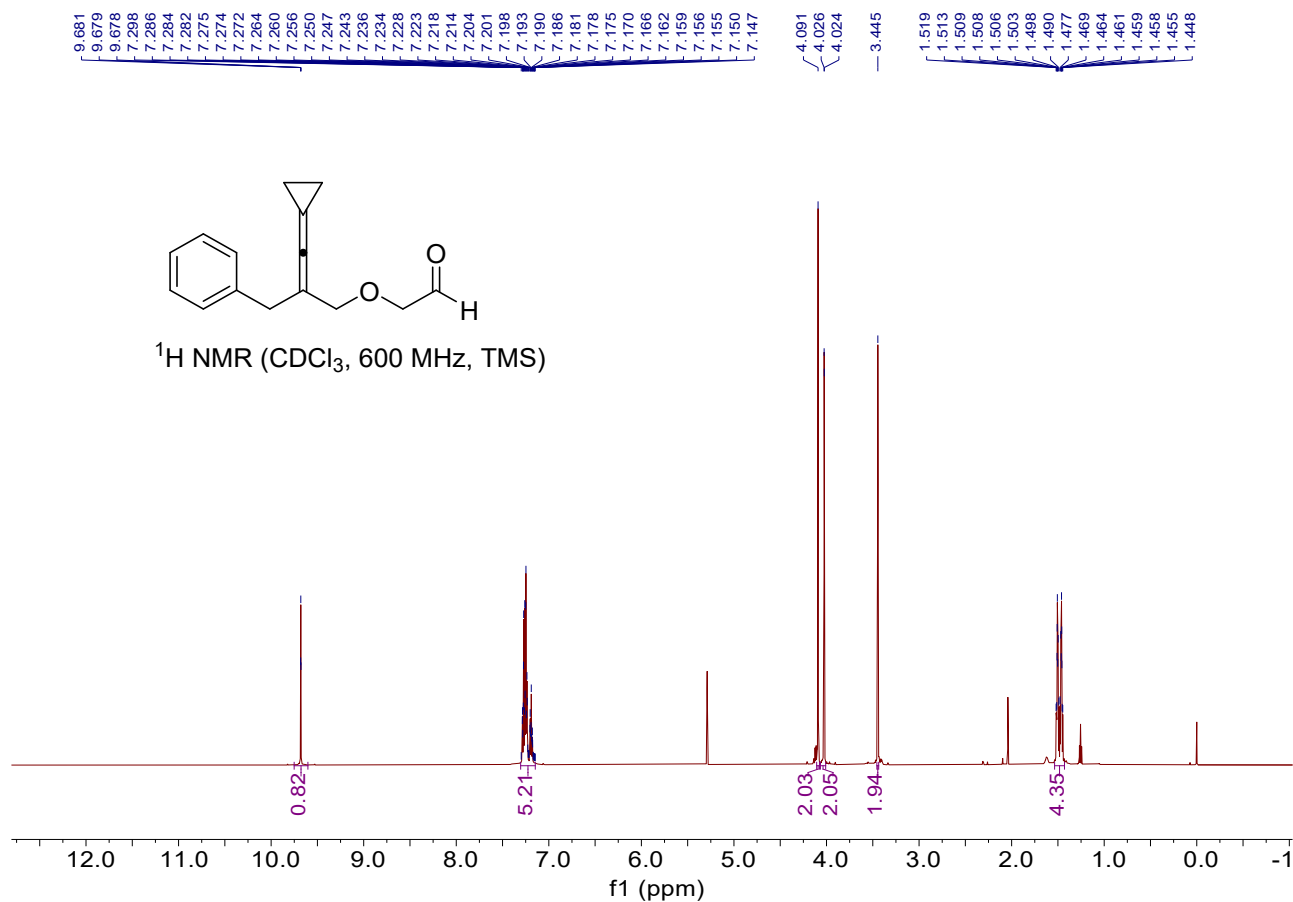

— 201.105

— 189.369

— 139.330

129.001

128.272

126.260

— 102.031

78.203

77.397

77.078

76.760

74.771

72.410

— 37.141

— 7.663

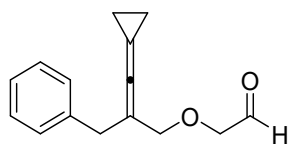

<sup>13</sup>C NMR (CDCl<sub>3</sub>, 100 MHz, TMS)

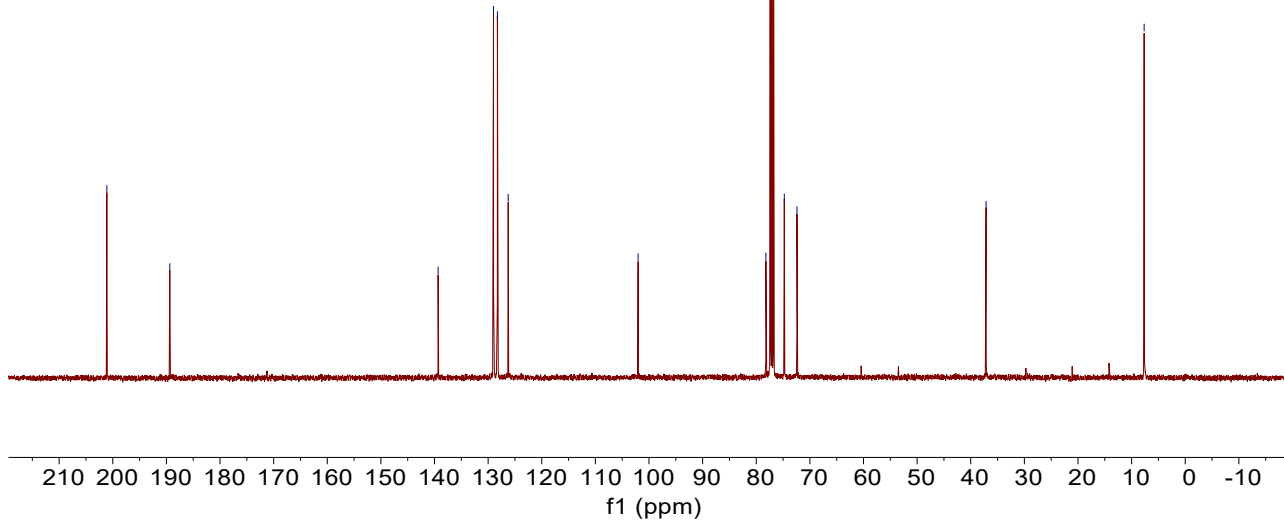

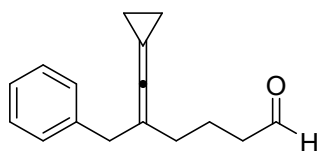

### 5-benzyl-6-cyclopropylidene- $\lambda^5$ -hex-5-enal (1ae)

A colorless oil, 60% yield, 136.4 mg.  $^1\text{H}$  NMR ( $\text{CDCl}_3$ , TMS, 600 MHz)  $\delta$  9.71 (t,  $J = 1.8$  Hz, 1H), 7.33 – 7.15 (m, 5H), 3.36 (s, 2H), 2.42 (td,  $J = 7.6, 1.8$  Hz, 2H), 2.01 (t,  $J = 7.6$  Hz, 2H), 1.75 (p,  $J = 7.6$  Hz, 2H), 1.48 – 1.35 (m, 4H).  $^{13}\text{C}$  NMR ( $\text{CDCl}_3$ , TMS, 100 MHz)  $\delta$  202.8, 187.6, 139.8, 128.9, 128.2, 126.1, 105.6, 78.7, 53.5, 43.4, 40.5, 31.4, 20.1, 6.8. IR (neat)  $\nu$  668, 987, 1228, 1737, 2022, 2924, 2976, 3026  $\text{cm}^{-1}$ . HRMS (EI) calcd. for  $\text{C}_{16}\text{H}_{18}\text{O}$ : 226.1352, Found: 226.1355.

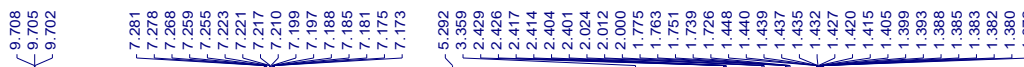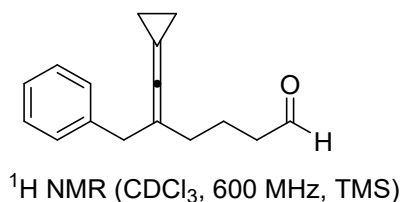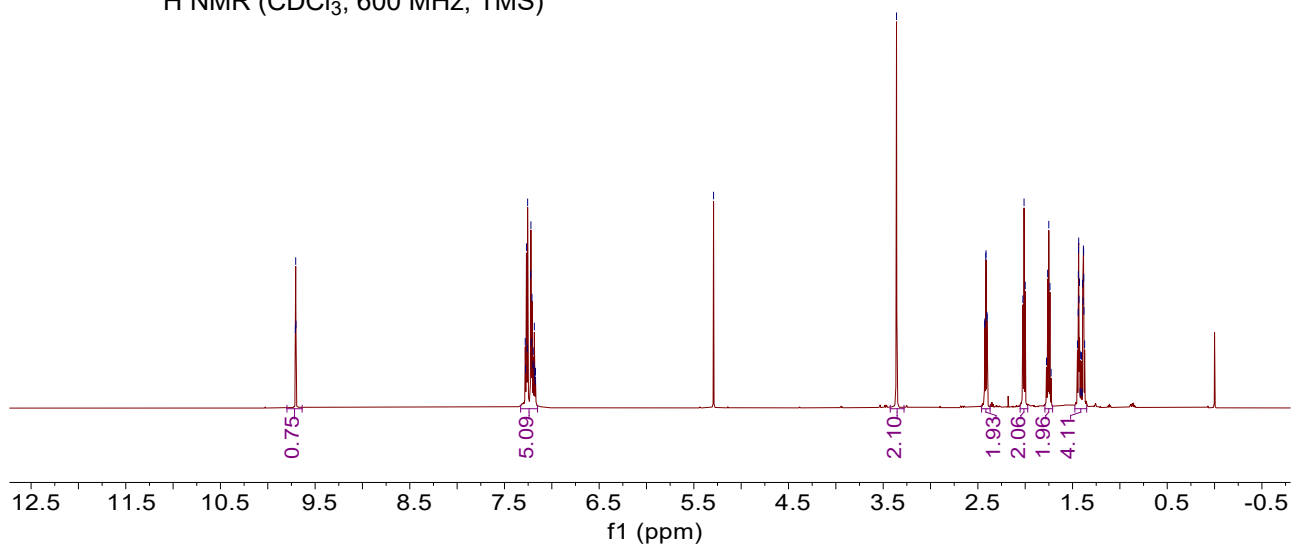



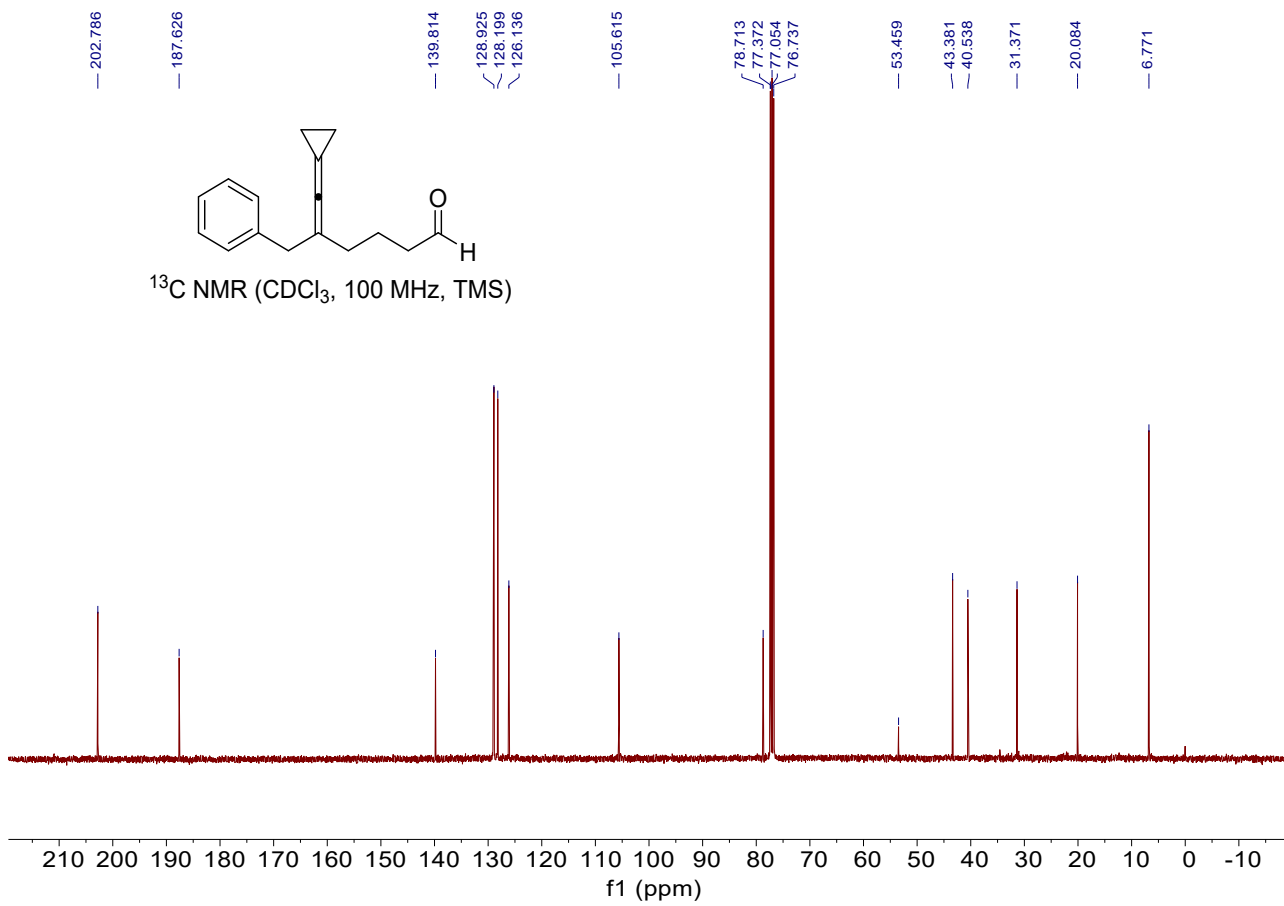

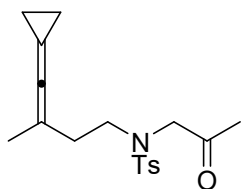

***N*-(4-cyclopropylidene-3-methyl-λ<sup>5</sup>-but-3-en-1-yl)-4-methyl-*N*-(2-oxopropyl)benzenesulfonamide (1af)**

A colorless oil, 90% yield, 299.7 mg. <sup>1</sup>H NMR (CDCl<sub>3</sub>, TMS, 600 MHz) δ 7.69 (d, *J* = 8.0 Hz, 2H), 7.30 (d, *J* = 8.0 Hz, 2H), 3.94 (s, 2H), 3.27 (t, *J* = 7.2 Hz, 2H), 2.43 (s, 3H), 2.23 (s, 3H), 2.20 (t, *J* = 7.2 Hz, 2H), 1.72 (s, 3H), 1.44 – 1.37 (m, 4H). <sup>13</sup>C NMR (CDCl<sub>3</sub>, TMS, 150 MHz) δ 204.6, 186.8, 143.6, 136.1, 129.7, 127.5, 99.23, 99.16, 78.1, 57.2, 47.4, 33.0, 27.0, 21.6, 19.7, 6.7. IR (neat) ν 668, 988, 1219, 1711, 2010, 2932, 2976, 3031 cm<sup>-1</sup>. HRMS (ESI) calcd. for C<sub>18</sub>H<sub>23</sub>NO<sub>3</sub>NaS (M+Na)<sup>+</sup>: 356.1290, Found: 356.1289.

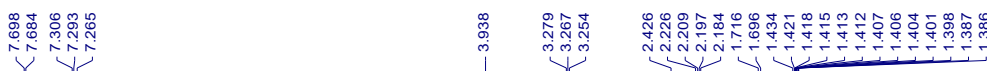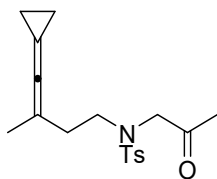

<sup>13</sup>C NMR (CDCl<sub>3</sub>, 150 MHz, TMS)

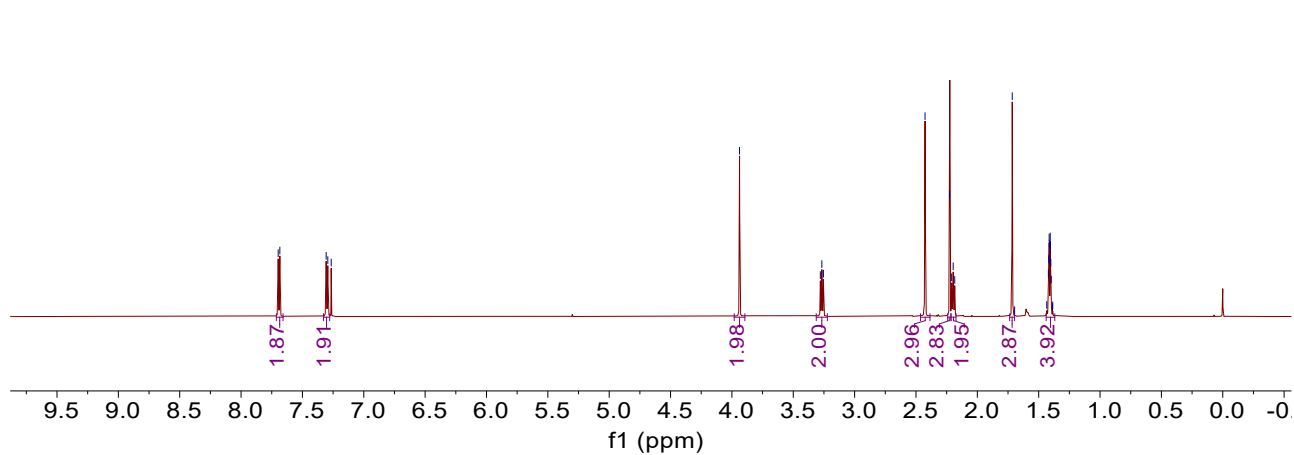

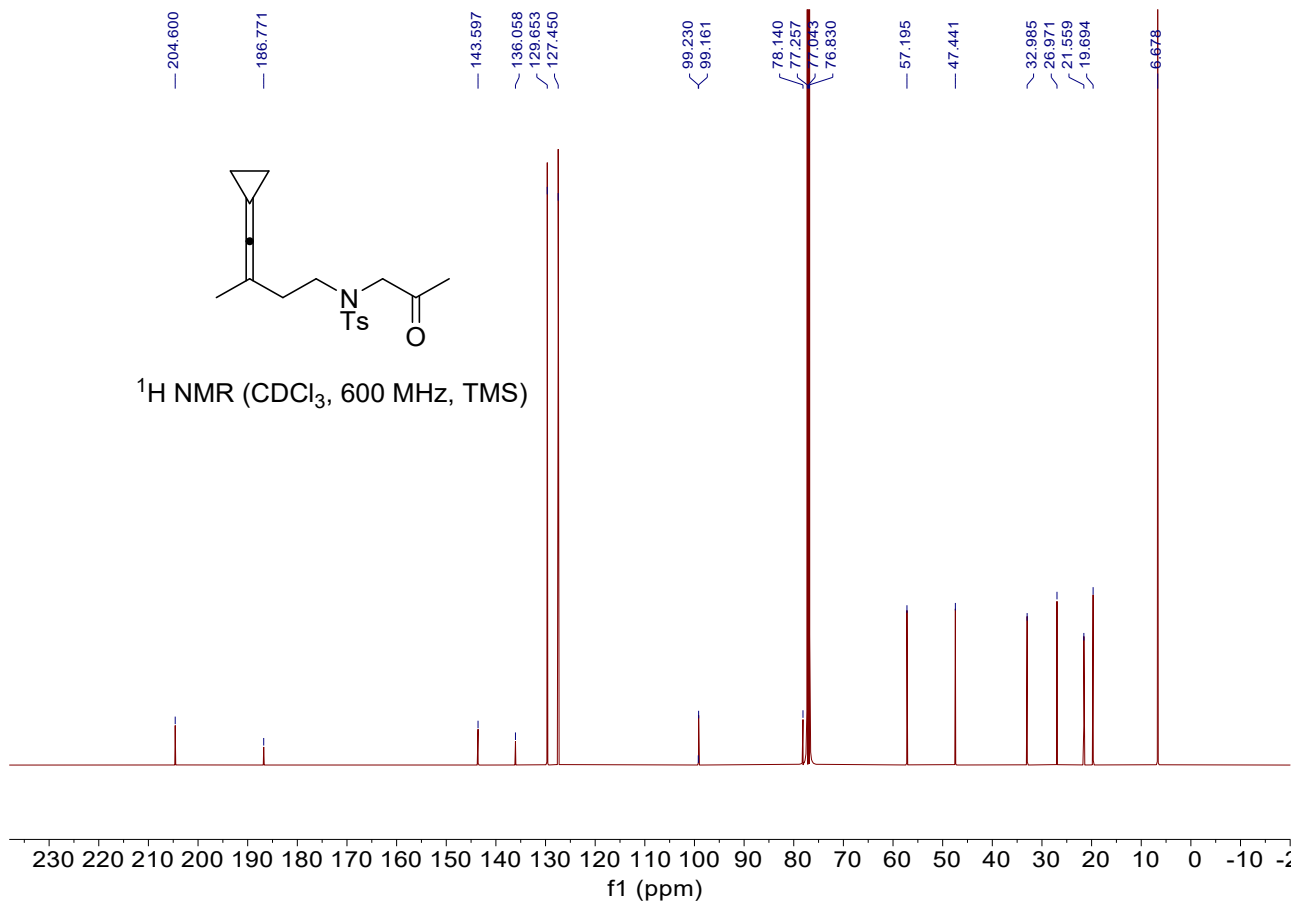

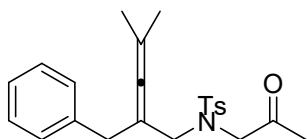

**N-(2-benzyl-4-methyl- $\lambda^5$ -penta-2,3-dien-1-yl)-4-methyl-N-(2-oxopropyl)benzenesulfonamide (1f)**

A yellow oil, 90% yield, 355.5 mg.  $^1\text{H}$  NMR ( $\text{CDCl}_3$ , TMS, 600 MHz)  $\delta$  7.68 – 7.63 (m, 2H), 7.29 – 7.25 (m, 4H), 7.21 – 7.19 (m, 1H), 7.19 – 7.15 (m, 2H), 3.90 (s, 2H), 3.65 (s, 2H), 3.26 (s, 2H), 2.41 (s, 3H), 2.17 (s, 3H), 1.55 (s, 6H).  $^{13}\text{C}$  NMR (100 MHz,  $\text{CDCl}_3$ )  $\delta$  204.0, 202.4, 143.5, 139.5, 136.0, 129.6, 129.0, 128.2, 127.5, 126.2, 97.3, 96.8, 63.9, 55.9, 51.3, 37.1, 26.9, 21.5, 20.3. IR (neat)  $\nu$  701, 1157, 1344, 1497, 1735, 2020, 2907, 3034  $\text{cm}^{-1}$ . HRMS (ESI) calcd. for  $\text{C}_{23}\text{H}_{28}\text{NO}_3\text{S}$  ( $\text{M}+\text{H}$ ) $^+$ : 398.1785, Found: 398.1800.

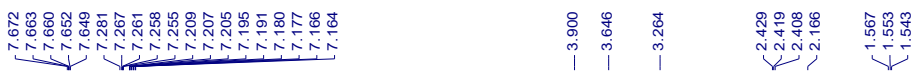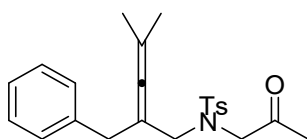

$^1\text{H}$  NMR ( $\text{CDCl}_3$ , 600 MHz, TMS)

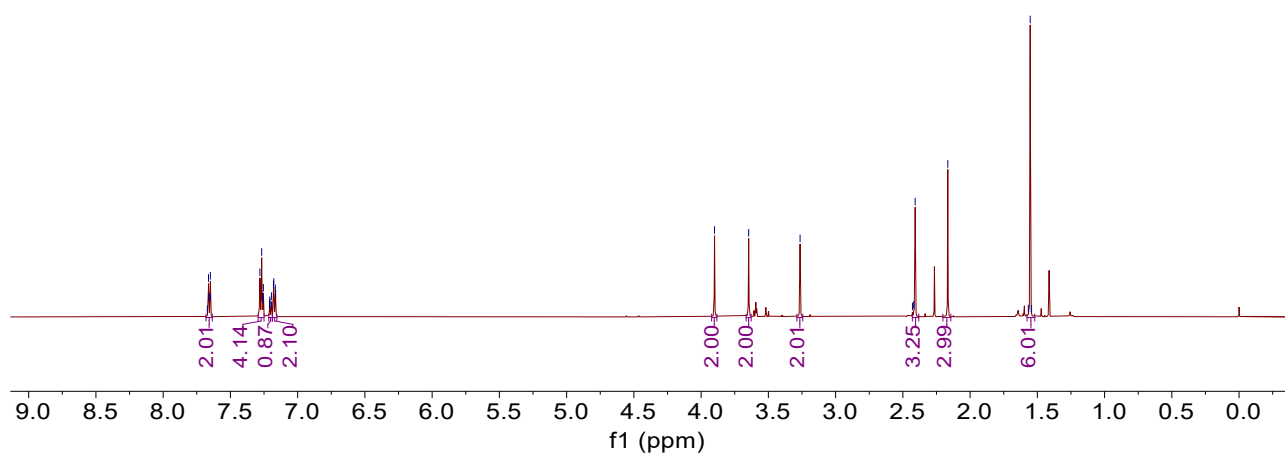

203.973  
202.420

143.548  
139.453  
135.975  
129.615  
129.005  
128.225  
127.514  
126.194

97.271  
96.799

77.384  
77.066  
76.749

63.926  
55.922  
51.336

37.148

26.886  
21.541  
20.288

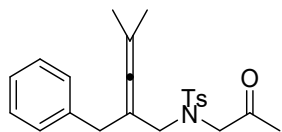

<sup>13</sup>C NMR (CDCl<sub>3</sub>, 100 MHz, TMS)

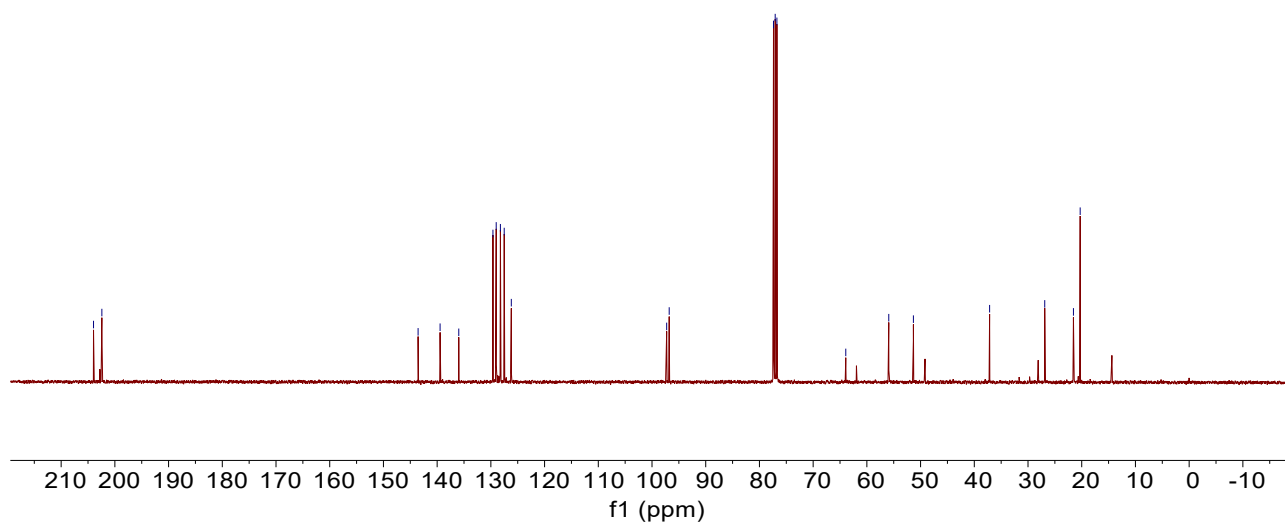

## 9. Spectroscopic data of products 2-14

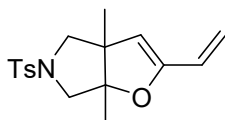

### 3a,6a-dimethyl-5-tosyl-2-vinyl-3a,5,6,6a-tetrahydro-4H-furo[2,3-c]pyrrole (2a)

A colorless oil, 96% yield, 30.6 mg.  $^1\text{H}$  NMR ( $\text{CDCl}_3$ , TMS, 400 MHz)  $\delta$  7.66 (d,  $J = 8.0$  Hz, 2H), 7.31 (d,  $J = 8.0$  Hz, 2H), 6.06 (dd,  $J = 17.2, 11.0$  Hz, 1H), 5.43 (dd,  $J = 17.2, 1.6$  Hz, 1H), 5.17 (dd,  $J = 11.0, 1.6$  Hz, 1H), 4.63 (s, 1H), 3.63 (d,  $J = 10.4$  Hz, 1H), 3.43 (d,  $J = 9.6$  Hz, 1H), 2.91 (d,  $J = 10.4$  Hz, 1H), 2.77 (d,  $J = 9.6$  Hz, 1H), 2.43 (s, 3H), 1.27 (s, 3H), 1.08 (s, 3H).  $^{13}\text{C}$  NMR ( $\text{CDCl}_3$ , TMS, 100 MHz)  $\delta$  153.6, 143.7, 132.4, 129.6, 128.0, 125.7, 116.5, 107.8, 92.4, 60.8, 60.7, 55.1, 21.6, 20.5, 19.8. IR (neat)  $\nu$  664, 760, 1029, 1092, 1162, 1346, 1596, 2853, 2924, 2956  $\text{cm}^{-1}$ . HRMS (ESI) calcd. for  $\text{C}_{17}\text{H}_{21}\text{NO}_3\text{SNa}$  ( $\text{M}+\text{Na}$ ) $^+$ : 342.1134, Found: 342.1133. Enantiomeric excess was determined by HPLC with a Chiralpak AD column [ $\lambda = 254\text{nm}$ ; eluent: Hexane/Isopropanol = 90/10; Flow rate: 0.8 mL/min;  $t_{\text{major}} = 25.95$  min,  $t_{\text{minor}} = 28.54$  min.; ee% = 20%.  $[\alpha]_{\text{D}}^{20} = +11.6$  (c 0.1, DCM).

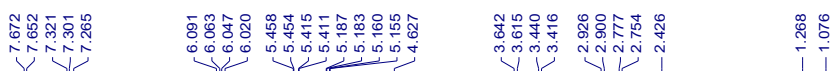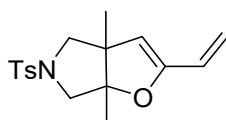

$^1\text{H}$  NMR ( $\text{CDCl}_3$ , 400 MHz, TMS)

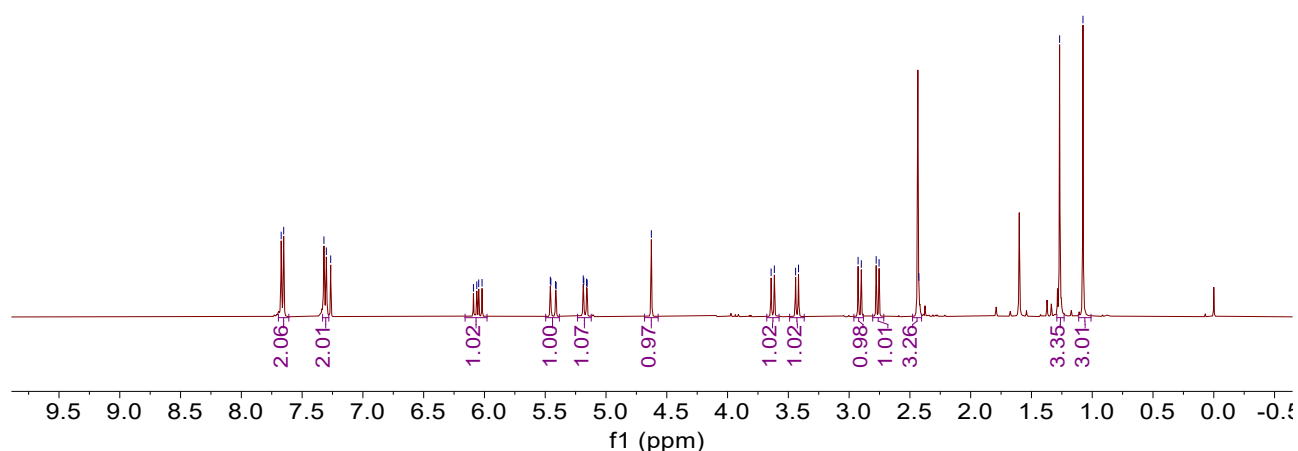

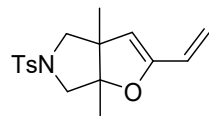

$^{13}\text{C}$  NMR ( $\text{CDCl}_3$ , 100 MHz, TMS)

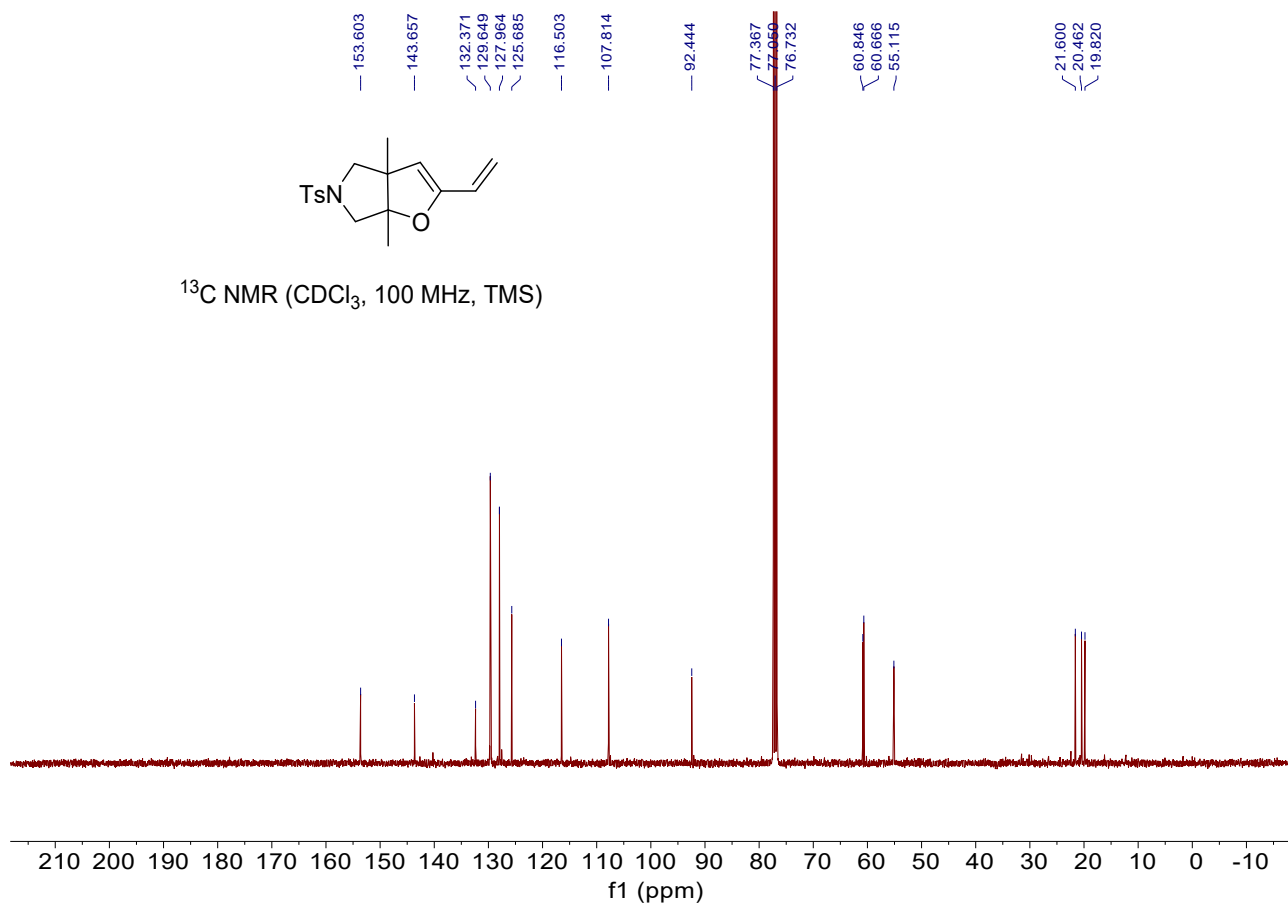

### Racemic

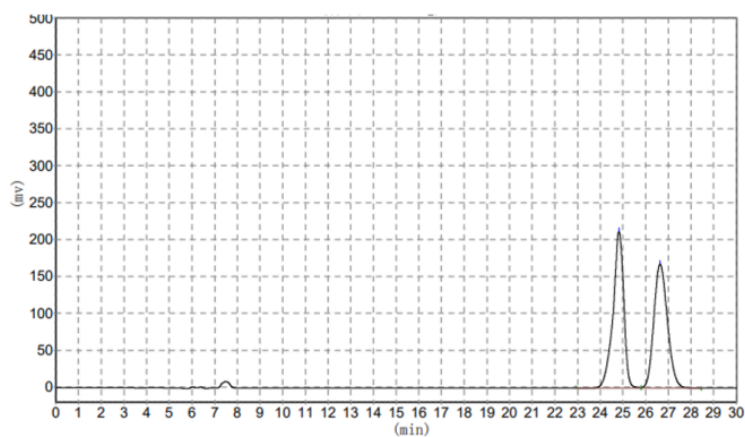

|       | Retention time | Height     | Area         | Area %   |
|-------|----------------|------------|--------------|----------|
| 1     | 24.823         | 212025.063 | 6981464.500  | 49.9043  |
| 2     | 26.638         | 167807.008 | 7008242.000  | 50.0957  |
| Total |                | 379833.000 | 13989706.500 | 100.0000 |

### Chiral

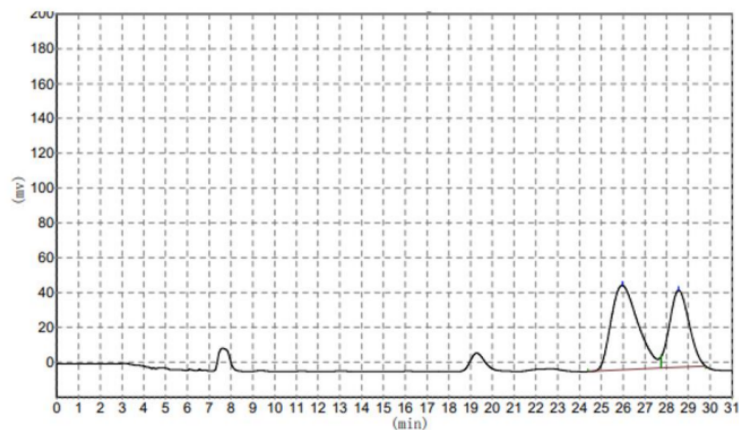

|       | Retention time | Height    | Area        | Area %   |
|-------|----------------|-----------|-------------|----------|
| 1     | 25.958         | 48700.676 | 4212416.500 | 60.5686  |
| 2     | 28.548         | 44283.008 | 2742368.000 | 39.4314  |
| Total |                | 92983.684 | 6954784.500 | 100.0000 |

Translation: Enantiomeric excess was determined by HPLC with a Chiralpak AD column [ $\lambda = 254$  nm; eluent: Hexane/Isopropanol = 90/10; Flow rate: 0.8 mL/min;  $t_{\text{major}} = 25.95$  min,  $t_{\text{minor}} = 28.54$  min.; ee% = 20%].



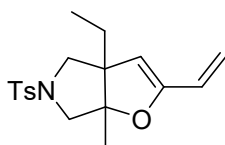

### 3a-ethyl-6a-methyl-5-tosyl-2-vinyl-3a,5,6,6a-tetrahydro-4H-furo[2,3-c]pyrrole (2b)

A colorless oil, 92% yield, 30.6 mg.  $^1\text{H}$  NMR ( $\text{CDCl}_3$ , TMS, 400 MHz)  $\delta$  7.65 (d,  $J = 8.0$  Hz, 2H), 7.30 (d,  $J = 8.0$  Hz, 2H), 6.06 (dd,  $J = 17.4, 11.0$  Hz, 1H), 5.43 (dd,  $J = 17.4, 1.6$  Hz, 1H), 5.16 (dd,  $J = 11.0, 1.6$  Hz, 1H), 4.78 (s, 1H), 3.61 (d,  $J = 10.4$  Hz, 1H), 3.43 (d,  $J = 9.6$  Hz, 1H), 2.88 (d,  $J = 10.4$  Hz, 1H), 2.77 (d,  $J = 9.6$  Hz, 1H), 2.42 (s, 3H), 1.53 – 1.28 (m, 2H), 1.26 (s, 3H), 0.87 (t,  $J = 7.4$  Hz, 3H).  $^{13}\text{C}$  NMR ( $\text{CDCl}_3$ , TMS, 100 MHz)  $\delta$  154.2, 143.6, 132.6, 129.6, 127.9, 125.8, 116.5, 105.0, 92.7, 61.0, 59.1, 58.9, 29.7, 27.7, 21.6, 19.4, 9.8. IR (neat)  $\nu$  664, 830, 1092, 1163, 1346, 1592, 2848, 2869, 2916, 2969  $\text{cm}^{-1}$ . HRMS (ESI) calcd. for  $\text{C}_{18}\text{H}_{23}\text{NO}_3\text{SNa}$  ( $\text{M}+\text{Na}$ ) $^+$ : 356.1291, Found: 356.1292.

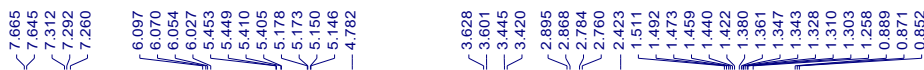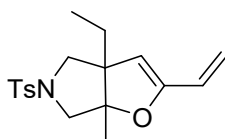

$^1\text{H}$  NMR ( $\text{CDCl}_3$ , 400 MHz, TMS)

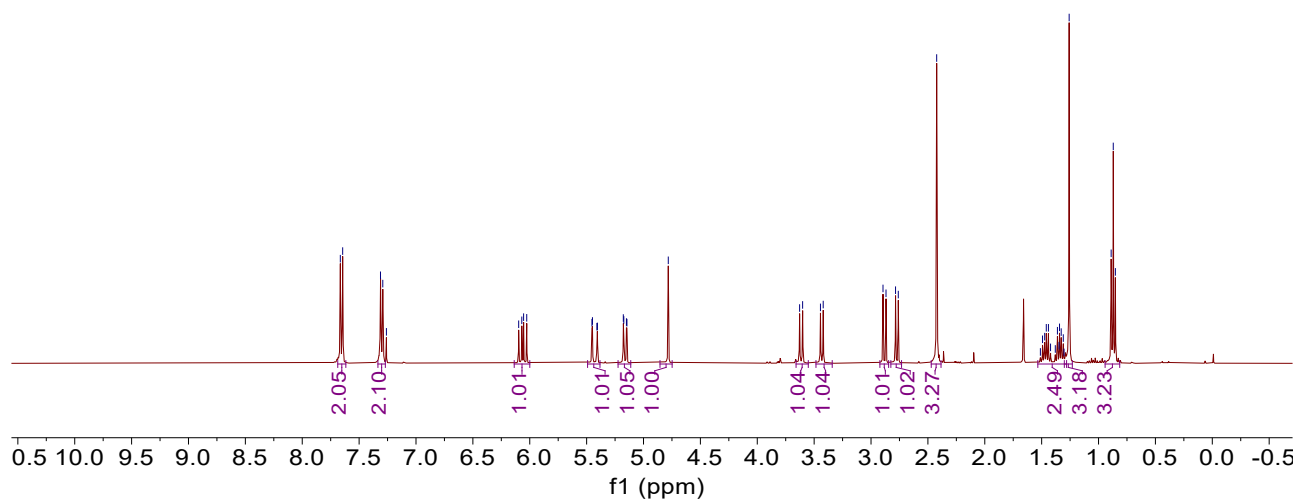

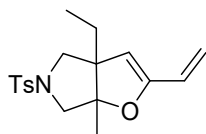

$^{13}\text{C}$  NMR ( $\text{CDCl}_3$ , 100 MHz, TMS)

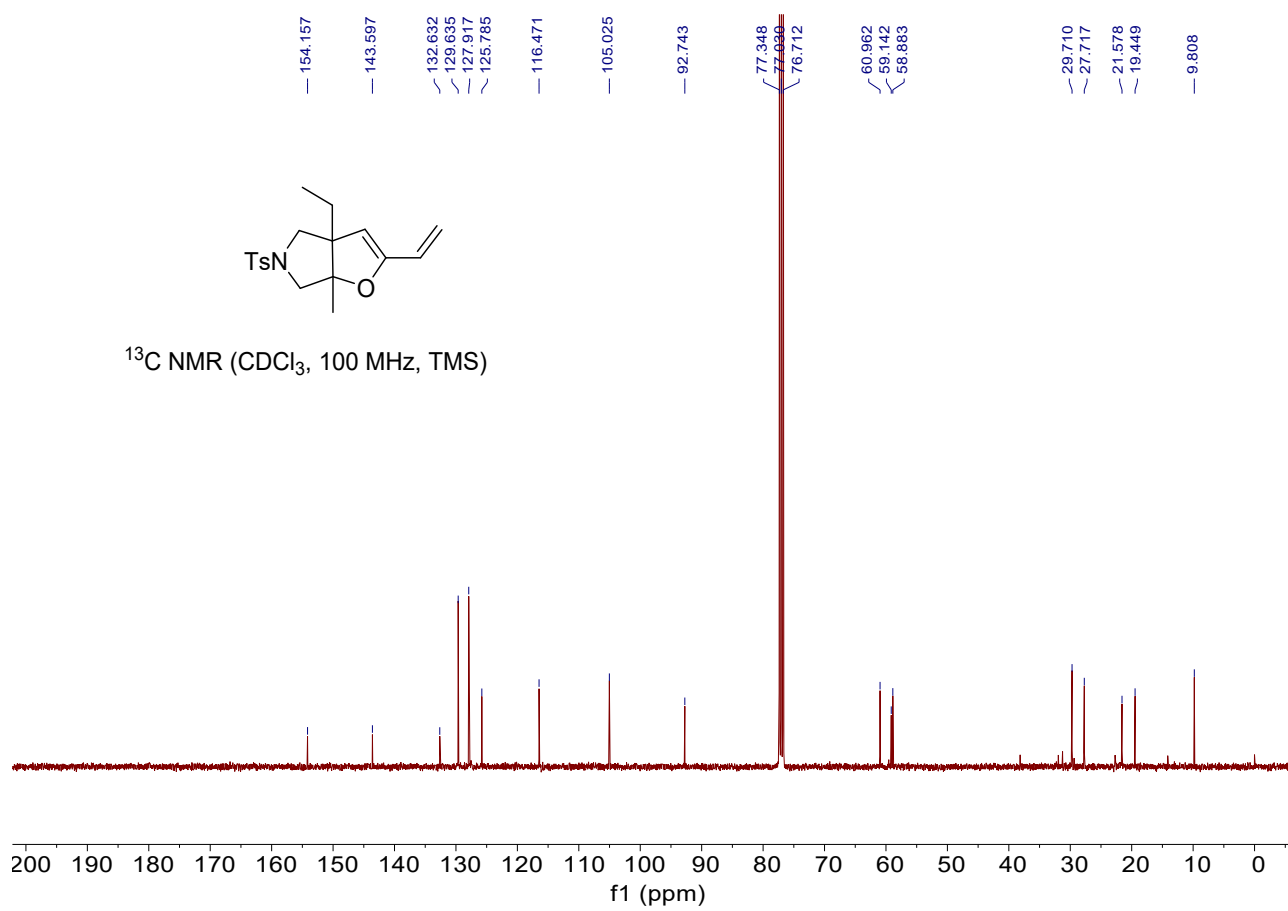

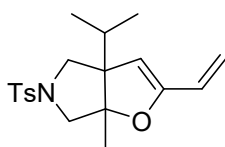

### 3a-isopropyl-6a-methyl-5-tosyl-2-vinyl-3a,5,6,6a-tetrahydro-4H-furo[2,3-c]pyrrole (2c)

A colorless oil, 90% yield, 31.2 mg.  $^1\text{H}$  NMR ( $\text{CDCl}_3$ , TMS, 400 MHz)  $\delta$  7.67 (d,  $J = 8.0$  Hz, 2H), 7.31 (d,  $J = 8.0$  Hz, 2H), 6.08 (dd,  $J = 17.4, 10.8$  Hz, 1H), 5.42 (dd,  $J = 17.4, 1.6$  Hz, 1H), 5.16 (dd,  $J = 11.2, 1.6$  Hz, 1H), 4.68 (s, 1H), 3.55 (d,  $J = 10.4$  Hz, 1H), 3.46 (d,  $J = 10.0$  Hz, 1H), 3.04 (d,  $J = 10.4$  Hz, 1H), 2.98 (d,  $J = 10.0$  Hz, 1H), 2.43 (s, 3H), 1.70 (hept,  $J = 6.8$  Hz, 1H), 1.35 (s, 3H), 0.82 (d,  $J = 6.8$  Hz, 6H).  $^{13}\text{C}$  NMR ( $\text{CDCl}_3$ , TMS, 100 MHz)  $\delta$  154.5, 143.6, 132.9, 129.6, 127.8, 125.8, 116.3, 104.3, 92.5, 62.1, 61.9, 57.4, 31.1, 21.6, 19.5, 19.2, 19.1. IR (neat)  $\nu$  663, 815, 1092, 1161, 1341, 1597, 2848, 2867, 2932, 2968  $\text{cm}^{-1}$ . HRMS (ESI) calcd. for  $\text{C}_{19}\text{H}_{26}\text{NO}_3\text{S}$  ( $\text{M}+\text{H}$ ) $^+$ : 348.1628, Found: 348.1619.

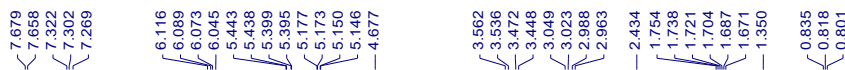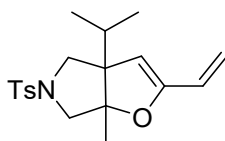

$^1\text{H}$  NMR ( $\text{CDCl}_3$ , 400 MHz, TMS)

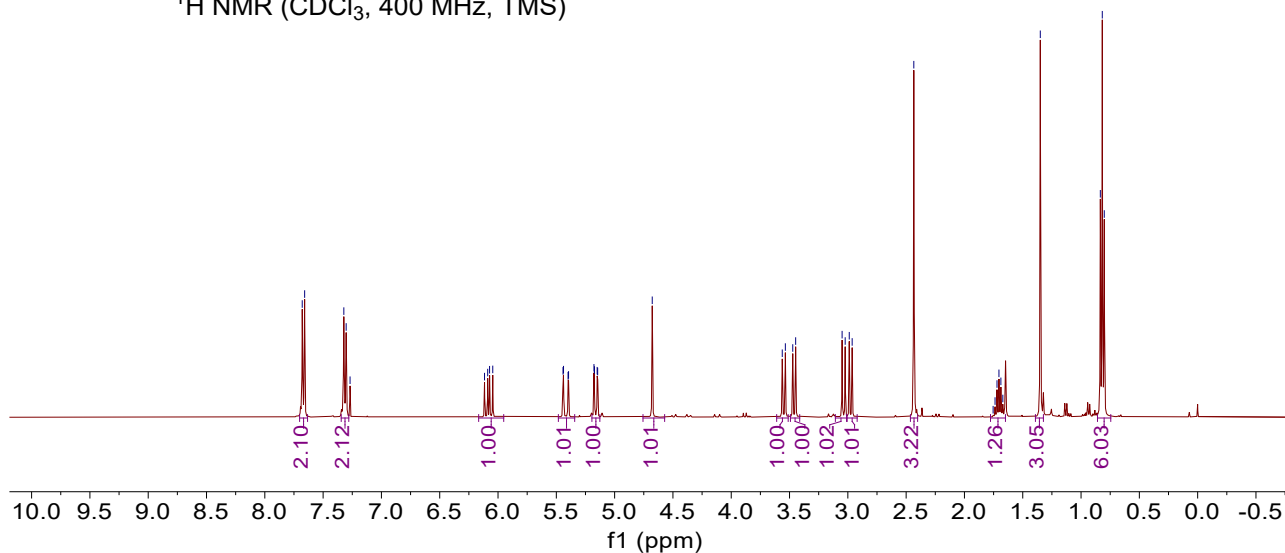

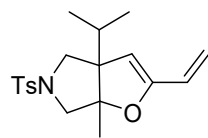

$^{13}\text{C}$  NMR ( $\text{CDCl}_3$ , 100 MHz, TMS)

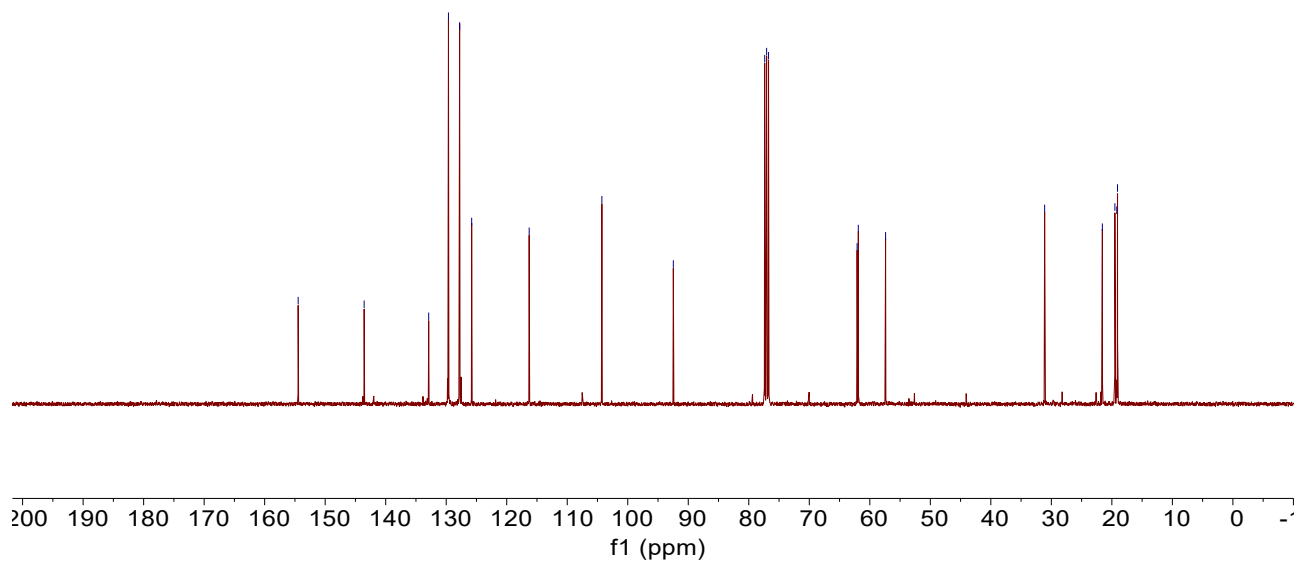

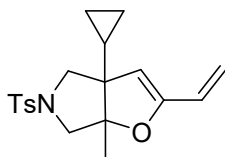

### 3a-cyclopropyl-6a-methyl-5-tosyl-2-vinyl-3a,5,6,6a-tetrahydro-4H-furo[2,3-c]pyrrole (2d)

A colorless oil, 80% yield, 27.8 mg.  $^1\text{H}$  NMR ( $\text{CDCl}_3$ , TMS, 400 MHz)  $\delta$  7.67 (d,  $J = 8.0$  Hz, 2H), 7.31 (d,  $J = 8.0$  Hz, 2H), 6.03 (dd,  $J = 17.2, 11.0$  Hz, 1H), 5.44 (dd,  $J = 17.2, 1.6$  Hz, 1H), 5.17 (dd,  $J = 10.8, 1.6$  Hz, 1H), 4.29 (s, 1H), 3.59 (d,  $J = 10.8$  Hz, 1H), 3.35 (d,  $J = 9.6$  Hz, 1H), 2.99 (d,  $J = 10.8$  Hz, 1H), 2.93 (d,  $J = 9.6$  Hz, 1H), 2.43 (s, 3H), 1.41 (s, 3H), 0.71 – 0.62 (m, 1H), 0.49 – 0.33 (m, 2H), 0.25 – 0.09 (m, 2H).  $^{13}\text{C}$  NMR ( $\text{CDCl}_3$ , TMS, 150 MHz)  $\delta$  155.4, 143.6, 132.5, 129.6, 128.0, 125.6, 116.7, 101.7, 93.4, 61.2, 59.9, 59.7, 21.6, 20.3, 13.9, 1.6, 0.2. IR (neat)  $\nu$  664, 815, 1092, 1163, 1347, 1593, 2849, 2869, 2928, 2998  $\text{cm}^{-1}$ . HRMS (ESI) calcd. for  $\text{C}_{19}\text{H}_{23}\text{NO}_3\text{SNa}$  ( $\text{M}+\text{Na}$ ) $^+$ : 368.1291, Found: 368.1288.

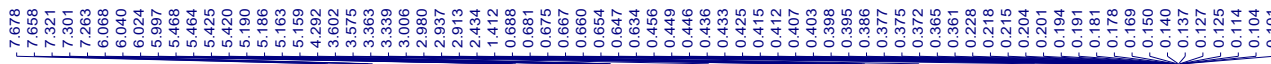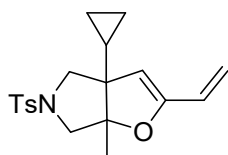

$^1\text{H}$  NMR ( $\text{CDCl}_3$ , 400 MHz, TMS)

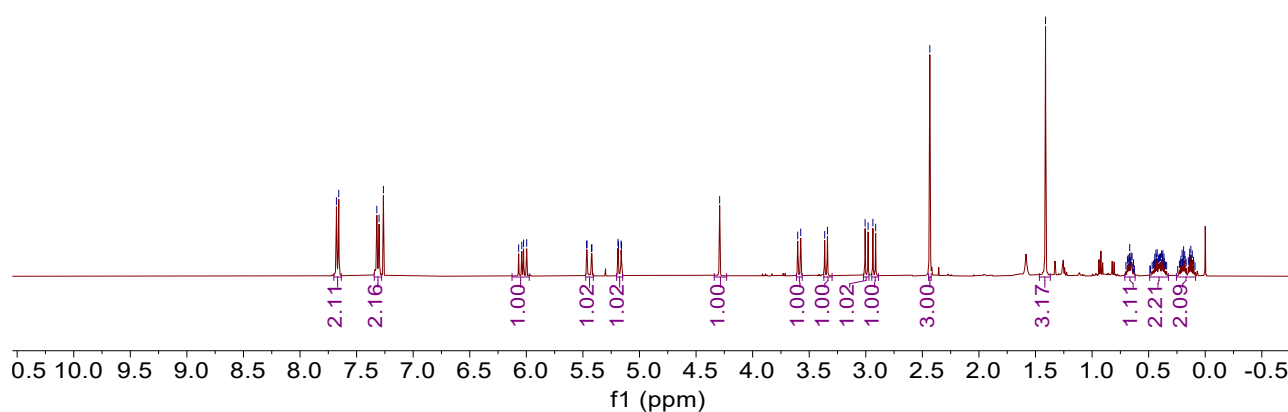

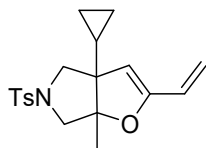

$^{13}\text{C}$  NMR ( $\text{CDCl}_3$ , 150 MHz, TMS)

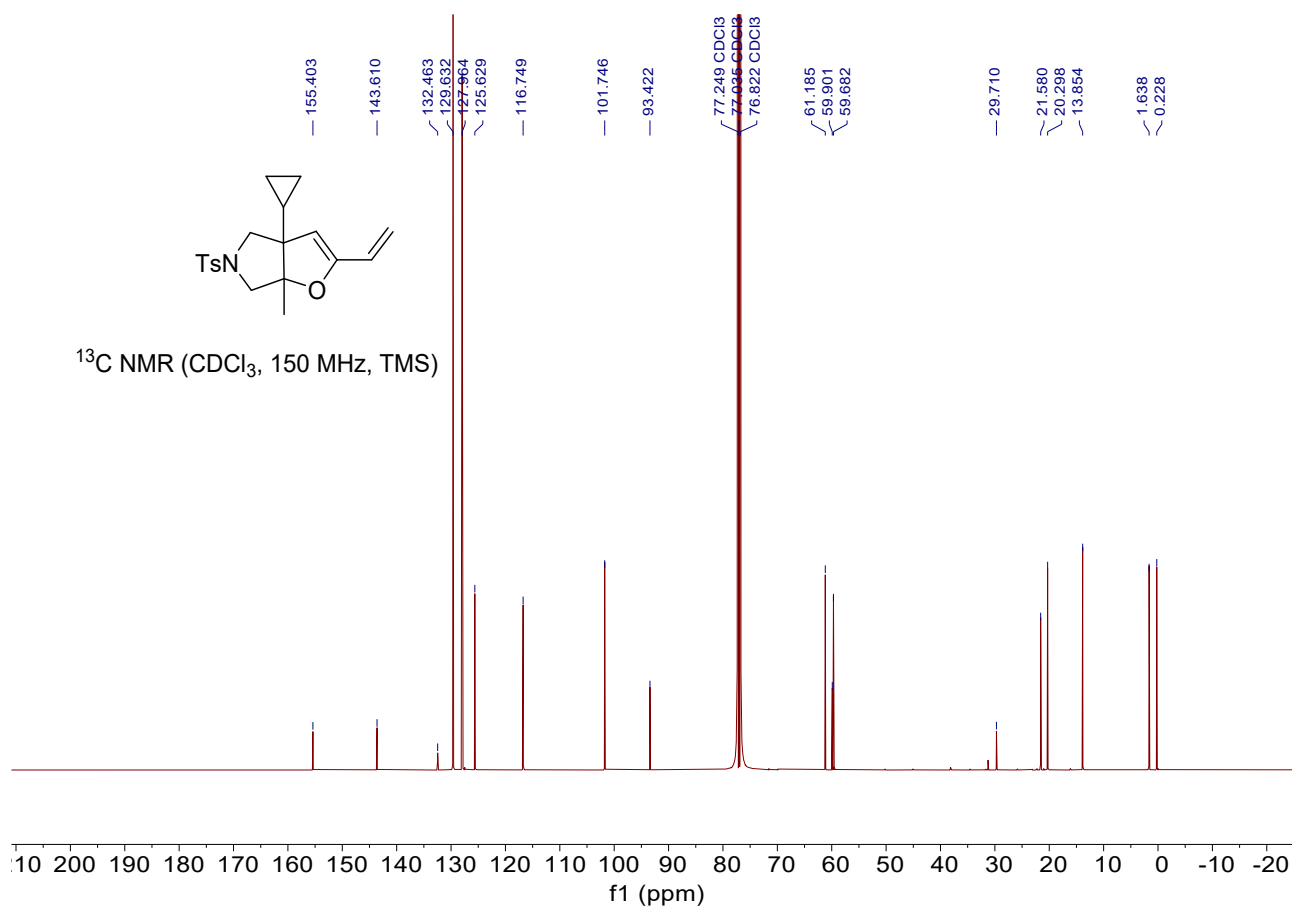

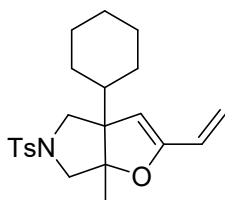

**3a-cyclohexyl-6a-methyl-5-tosyl-2-vinyl-3a,5,6,6a-tetrahydro-4H-furo[2,3-c]pyrrole (2e)**

A colorless oil, 72% yield, 27.9 mg.  $^1\text{H}$  NMR ( $\text{CDCl}_3$ , TMS, 400 MHz)  $\delta$  7.66 (d,  $J = 8.0$  Hz, 2H), 7.31 (d,  $J = 8.0$  Hz, 2H), 6.07 (dd,  $J = 17.4, 11.0$  Hz, 1H), 5.41 (dd,  $J = 17.4, 2.4$  Hz, 1H), 5.15 (dd,  $J = 10.8, 1.6$  Hz, 1H), 4.69 (s, 1H), 3.54 (d,  $J = 10.6$  Hz, 1H), 3.45 (d,  $J = 10.0$  Hz, 1H), 3.03 (d,  $J = 10.6$  Hz, 1H), 2.97 (d,  $J = 10.0$  Hz, 1H), 2.44 (s, 3H), 1.76 – 1.60 (m, 4H), 1.50 – 1.40 (m, 1H), 1.36 (s, 3H), 1.32 – 0.92 (m, 7H).  $^{13}\text{C}$  NMR ( $\text{CDCl}_3$ , TMS, 100 MHz)  $\delta$  154.1, 143.5, 133.0, 129.6, 127.8, 125.8, 116.2, 105.4, 92.6, 61.9, 61.6, 57.3, 42.0, 29.3, 29.0, 26.7, 26.3, 26.1, 26.0, 21.6, 19.5. IR (neat)  $\nu$  666, 815, 1092, 1163, 1347, 1592, 2852, 2929  $\text{cm}^{-1}$ . HRMS (ESI) calcd. for  $\text{C}_{15}\text{H}_{19}\text{NO}_2\text{SNa}$  ( $\text{M}+\text{Na}$ ) $^+$ : 410.1760, Found: 410.1761.

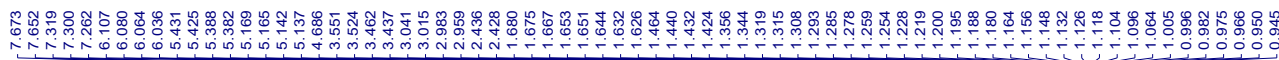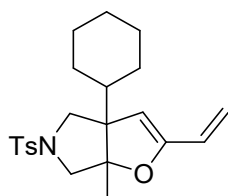

$^1\text{H}$  NMR ( $\text{CDCl}_3$ , 400 MHz, TMS)

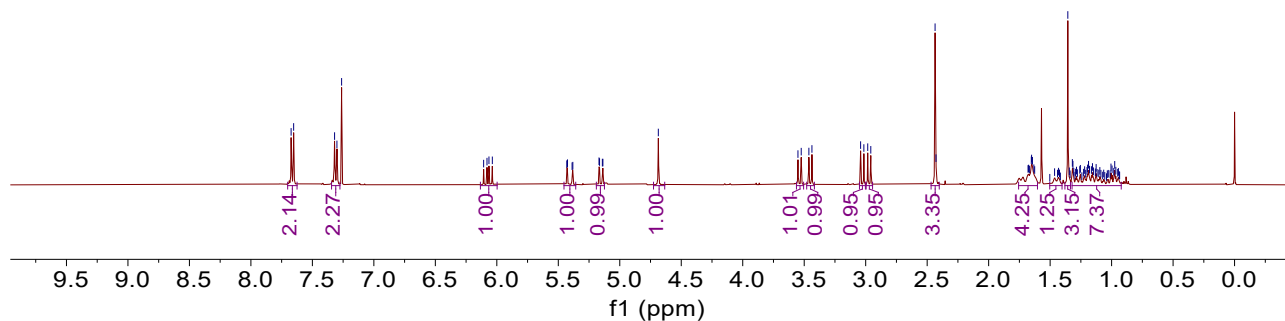

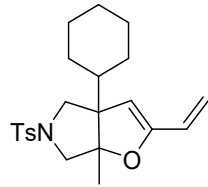

$^{13}\text{C}$  NMR ( $\text{CDCl}_3$ , 100 MHz, TMS)

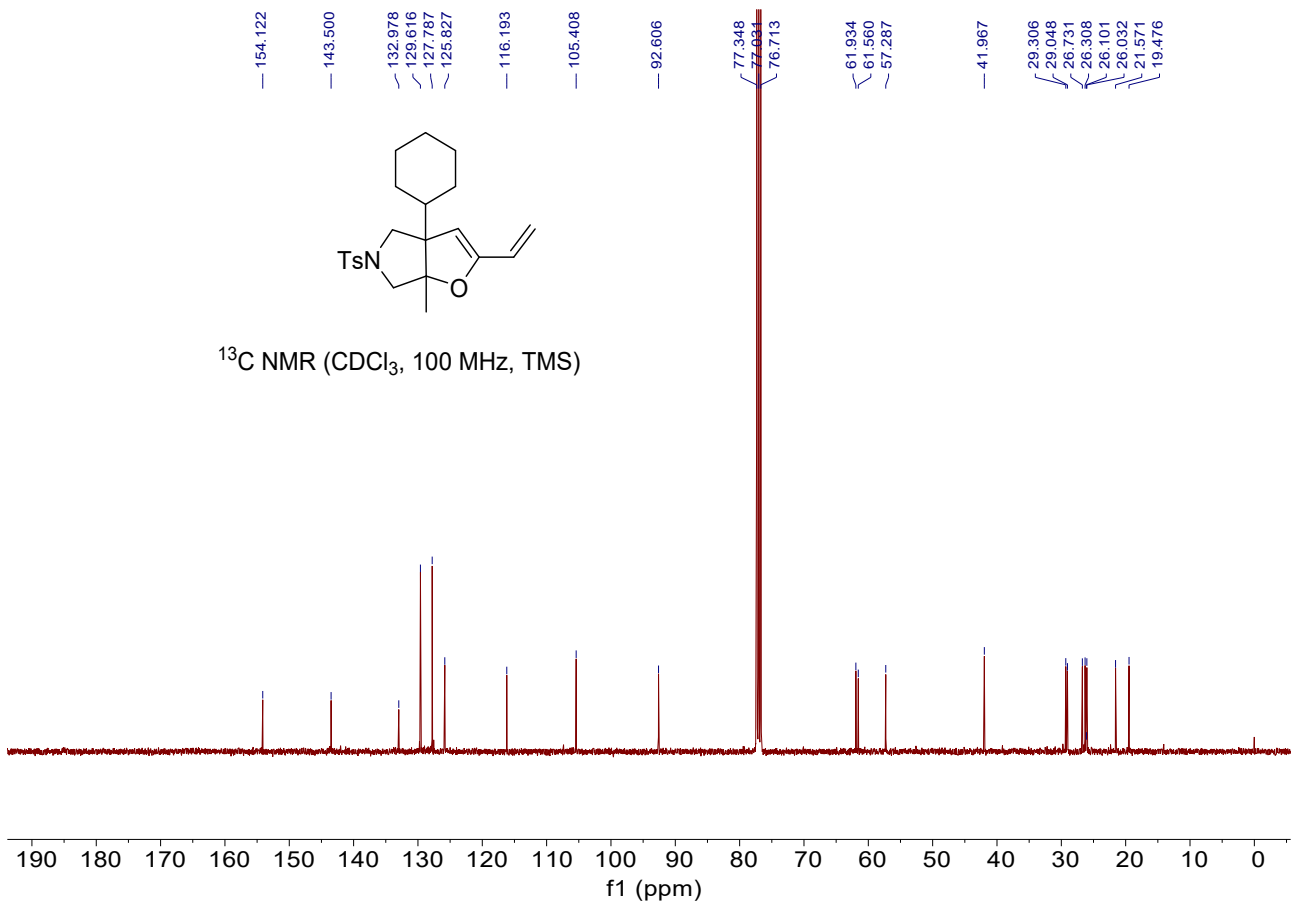



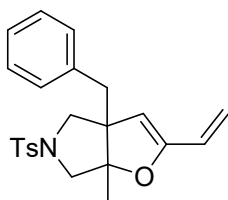

**3a-benzyl-6a-methyl-5-tosyl-2-vinyl-3a,5,6,6a-tetrahydro-4H-furo[2,3-c]pyrrole (2f)**

A yellow oil, 94% yield, 36.3 mg.  $^1\text{H}$  NMR ( $\text{CDCl}_3$ , TMS, 400 MHz)  $\delta$  7.64 (d,  $J = 8.4$  Hz, 2H), 7.33 – 7.21 (m, 5H), 7.10 (d,  $J = 6.6$  Hz, 2H), 6.06 (dd,  $J = 17.2$ , 11.0 Hz, 1H), 5.46 (dd,  $J = 17.2$ , 1.6 Hz, 1H), 5.19 (dd,  $J = 10.8$ , 1.6 Hz, 1H), 4.60 (s, 1H), 3.61 (d,  $J = 10.8$  Hz, 1H), 3.14 (d,  $J = 10.0$  Hz, 1H), 3.10 (d,  $J = 10.0$  Hz, 1H), 3.04 (d,  $J = 10.4$  Hz, 1H), 2.75 (d,  $J = 12.8$  Hz, 1H), 2.60 (d,  $J = 12.8$  Hz, 1H), 2.42 (s, 3H), 1.41 (s, 3H).  $^{13}\text{C}$  NMR ( $\text{CDCl}_3$ , TMS, 100 MHz)  $\delta$  157.2, 145.3, 137.5, 132.7, 129.1, 128.5, 127.9, 126.7, 125.8, 117.2, 107.3, 94.4, 62.1, 59.3, 58.0, 42.9, 29.2, 21.6, 19.8. IR (neat)  $\nu$  665, 987, 1220, 1355, 1592, 2849, 2917  $\text{cm}^{-1}$ . HRMS (ESI) calcd. for  $\text{C}_{23}\text{H}_{25}\text{NO}_3\text{SNa}$  ( $\text{M}+\text{Na}$ ) $^+$ : 418.1447, Found: 418.1447.

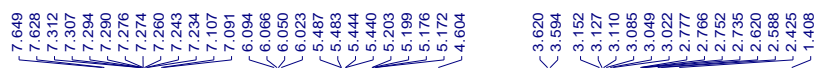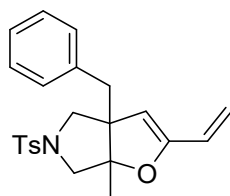

$^1\text{H}$  NMR ( $\text{CDCl}_3$ , 400 MHz, TMS)

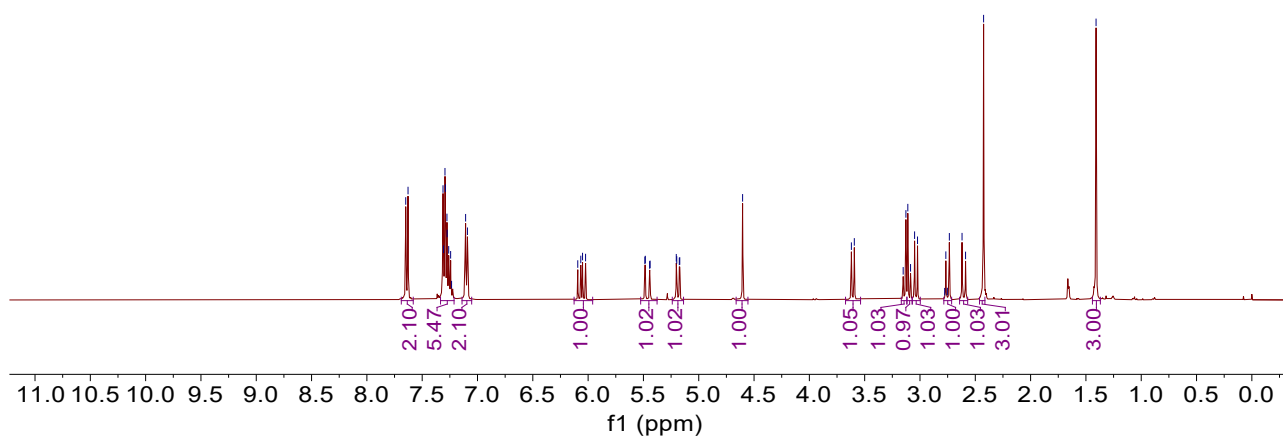

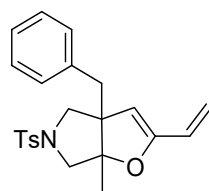

$^{13}\text{C}$  NMR ( $\text{CDCl}_3$ , 100 MHz, TMS)

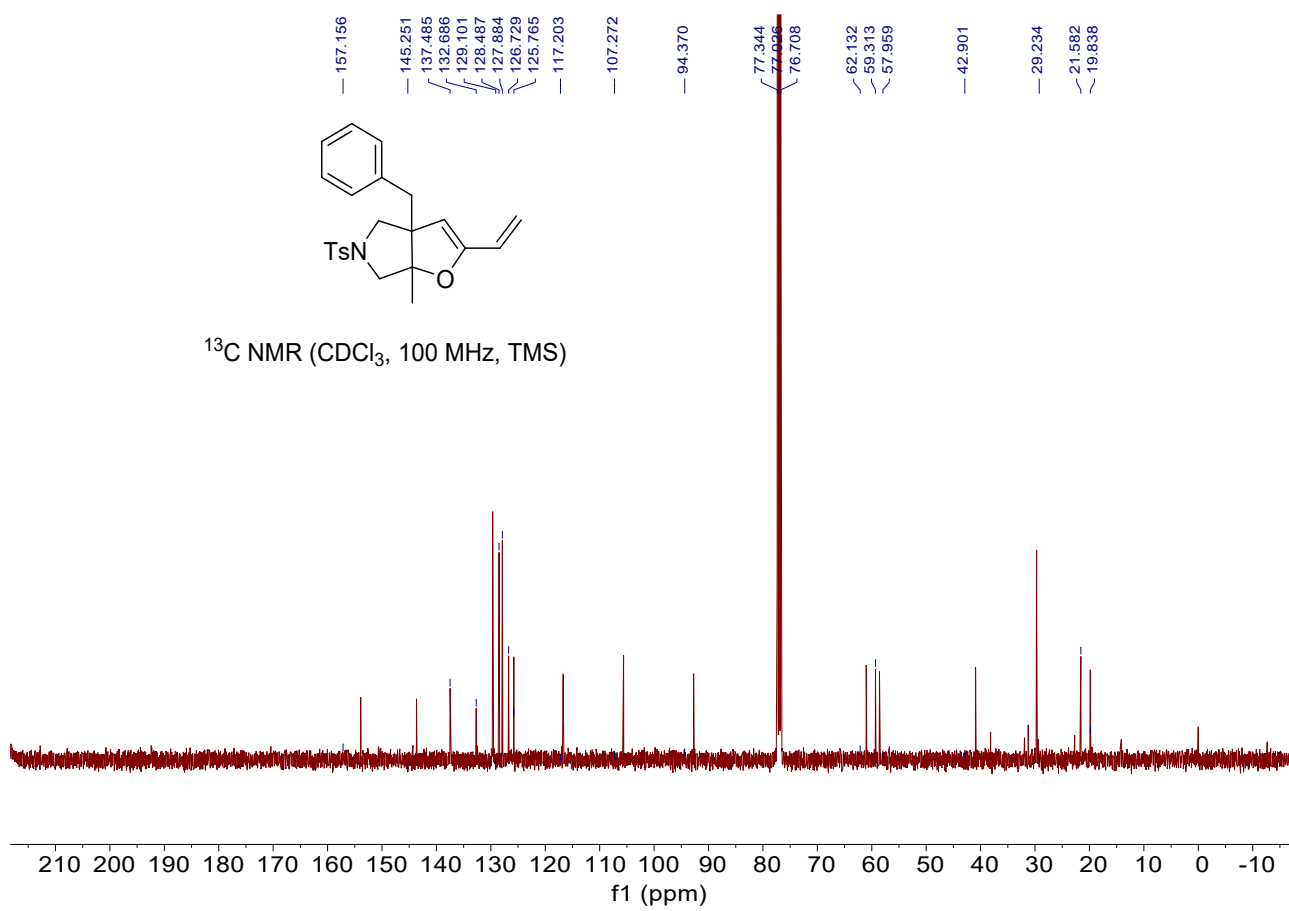

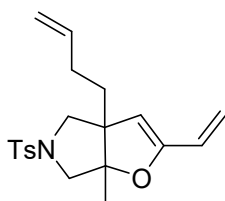

**3a-(but-3-en-1-yl)-6a-methyl-5-tosyl-2-vinyl-3a,5,6,6a-tetrahydro-4H-furo[2,3-c]pyrrole (2g)**

A yellow oil, 82% yield, 29.4 mg.  $^1\text{H}$  NMR ( $\text{CDCl}_3$ , TMS, 400 MHz)  $\delta$  7.66 (d,  $J = 8.0$  Hz, 2H), 7.32 (d,  $J = 8.0$  Hz, 2H), 6.07 (ddd,  $J = 17.2, 11.2, 3.2$  Hz, 1H), 5.83 – 5.69 (m, 1H), 5.44 (ddd,  $J = 17.2, 6.0, 1.6$  Hz, 1H), 5.18 (ddd,  $J = 11.2, 5.6, 1.6$  Hz, 1H), 5.04 – 4.94 (m, 1H), 4.78 (s, 1H), 3.62 (d,  $J = 10.6$  Hz, 1H), 3.46 (d,  $J = 9.6$  Hz, 1H), 2.79 (d,  $J = 9.6$  Hz, 2H), 2.44 (s, 3H), 2.17 – 1.85 (m, 2H), 1.56 – 1.49 (m, 1H), 1.42 – 1.32 (m, 1H), 1.30 – 1.24 (m, 3H).  $^{13}\text{C}$  NMR ( $\text{CDCl}_3$ , TMS, 100 MHz)  $\delta$  155.7, 142.7, 138.0, 129.7, 127.9, 125.7, 116.7, 115.1, 105.1, 92.9, 60.8, 59.0, 58.4, 34.4, 29.8, 21.6, 19.6. IR (neat)  $\nu$  665, 987, 1347, 1640, 2851, 2869, 2926, 2974  $\text{cm}^{-1}$ . HRMS (ESI) calcd. for  $\text{C}_{20}\text{H}_{25}\text{NO}_3\text{SNa}$  ( $\text{M}+\text{Na}$ ) $^+$ : 382.1447, Found: 382.1444.

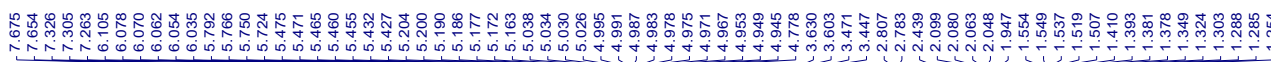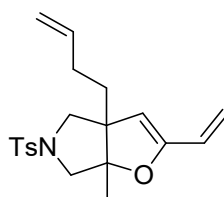

$^1\text{H}$  NMR ( $\text{CDCl}_3$ , 400 MHz, TMS)

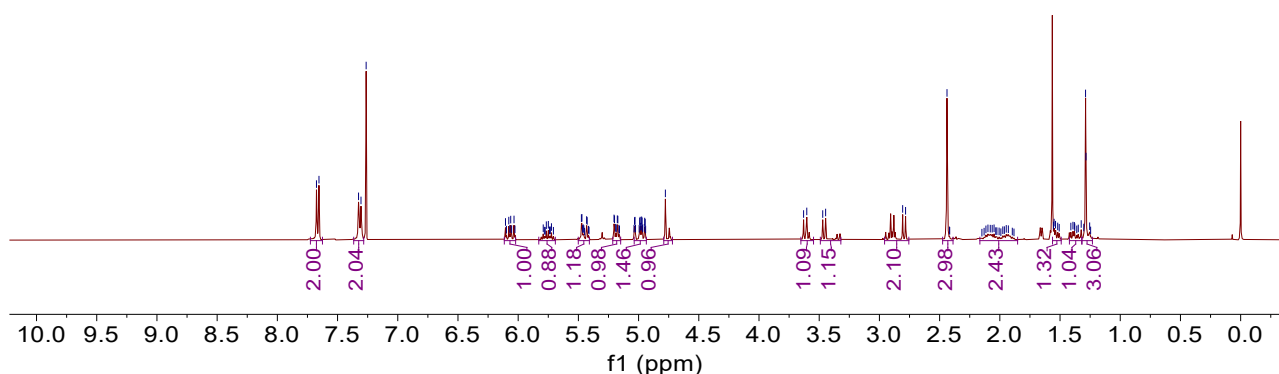

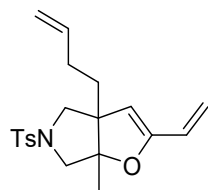

$^{13}\text{C}$  NMR ( $\text{CDCl}_3$ , 100 MHz, TMS)

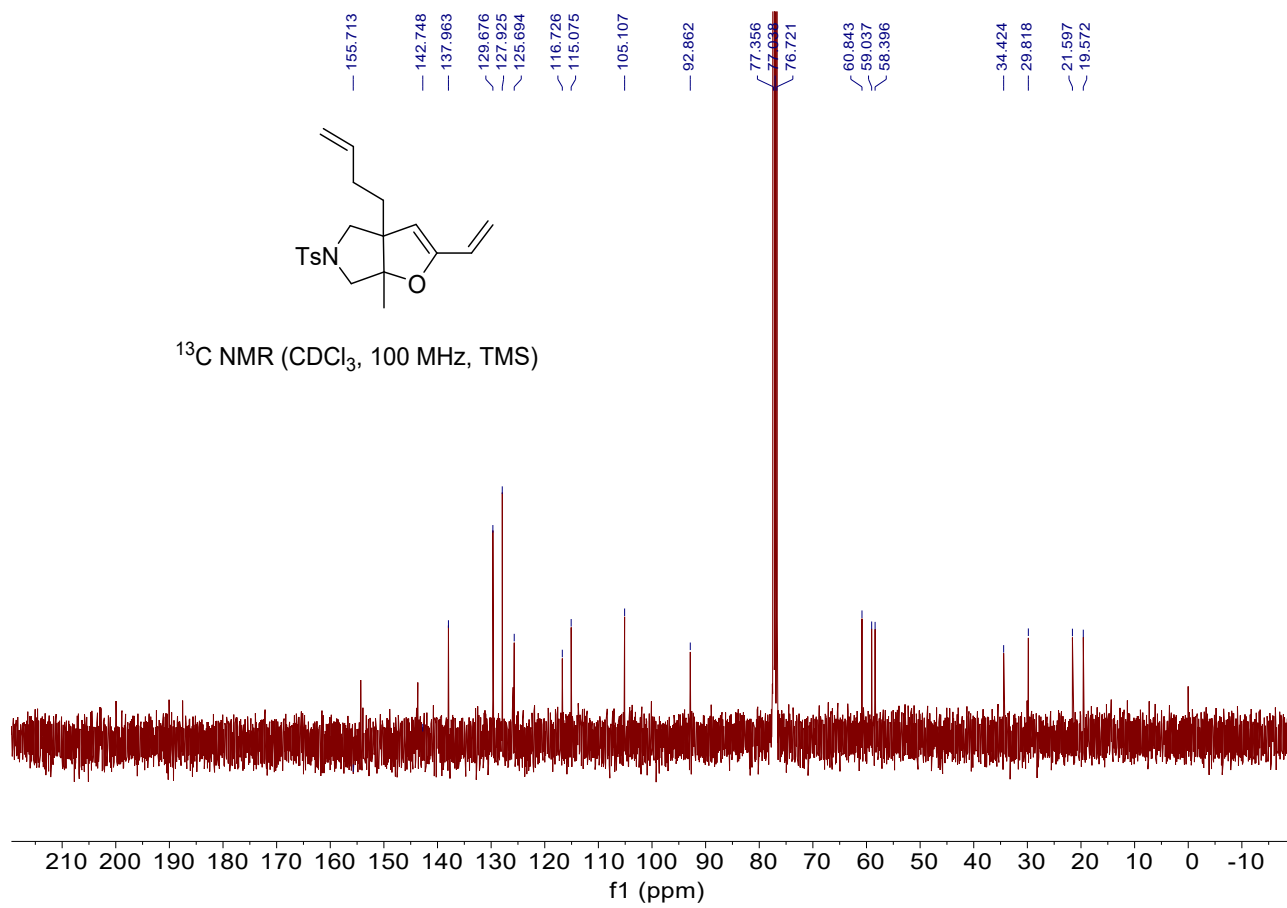

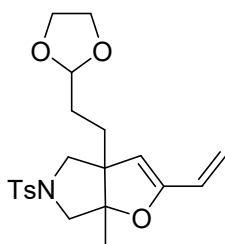

**3a-(2-(1,3-dioxolan-2-yl)ethyl)-6a-methyl-5-tosyl-2-vinyl-3a,5,6,6a-tetrahydro-4H-furo[2,3-c]pyrrole (2h)**

A brown oil, 93% yield, 35.6 mg.  $^1\text{H}$  NMR ( $\text{CDCl}_3$ , TMS, 400 MHz)  $\delta$  7.65 (d,  $J = 8.0$  Hz, 2H), 7.31 (d,  $J = 8.0$  Hz, 2H), 6.06 (dd,  $J = 17.2, 11.2$  Hz, 1H), 5.45 (dd,  $J = 17.2, 1.6$  Hz, 1H), 5.18 (dd,  $J = 10.8, 1.6$  Hz, 1H), 4.80 (t,  $J = 4.4$  Hz, 1H), 4.73 (s, 1H), 4.00 – 3.89 (m, 2H), 3.88 – 3.79 (m, 2H), 3.64 (d,  $J = 10.4$  Hz, 1H), 3.45 (d,  $J = 9.6$  Hz, 1H), 2.87 (d,  $J = 10.6$  Hz, 1H), 2.77 (d,  $J = 9.6$  Hz, 1H), 2.44 (s, 3H), 1.74 – 1.39 (m, 5H), 1.29 (s, 3H).  $^{13}\text{C}$  NMR ( $\text{CDCl}_3$ , TMS, 150 MHz)  $\delta$  154.5, 143.7, 132.5, 132.4, 129.7, 127.9, 125.7, 116.7, 104.8, 104.1, 92.8, 65.0, 61.0, 59.0, 58.2, 30.0, 28.9, 21.6, 19.6. IR (neat)  $\nu$  664, 815, 1220, 1356, 1709, 2018, 2880, 2919, 2959  $\text{cm}^{-1}$ . HRMS (ESI) calcd. for  $\text{C}_{21}\text{H}_{28}\text{NO}_5\text{S}$  ( $\text{M}+\text{H}$ ) $^+$ : 406.1683, Found: 406.1688.

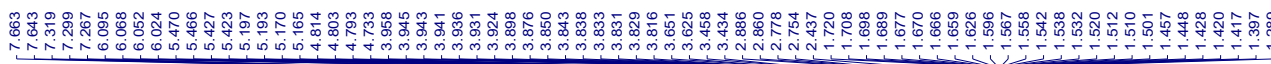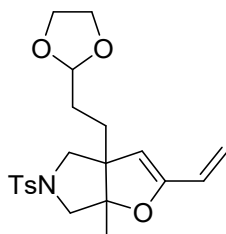

$^1\text{H}$  NMR ( $\text{CDCl}_3$ , 400 MHz, TMS)

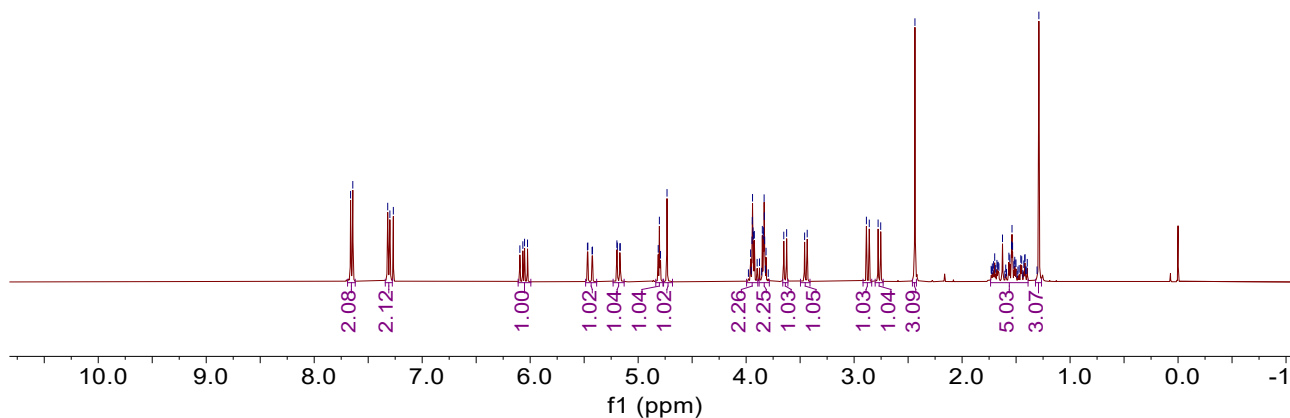

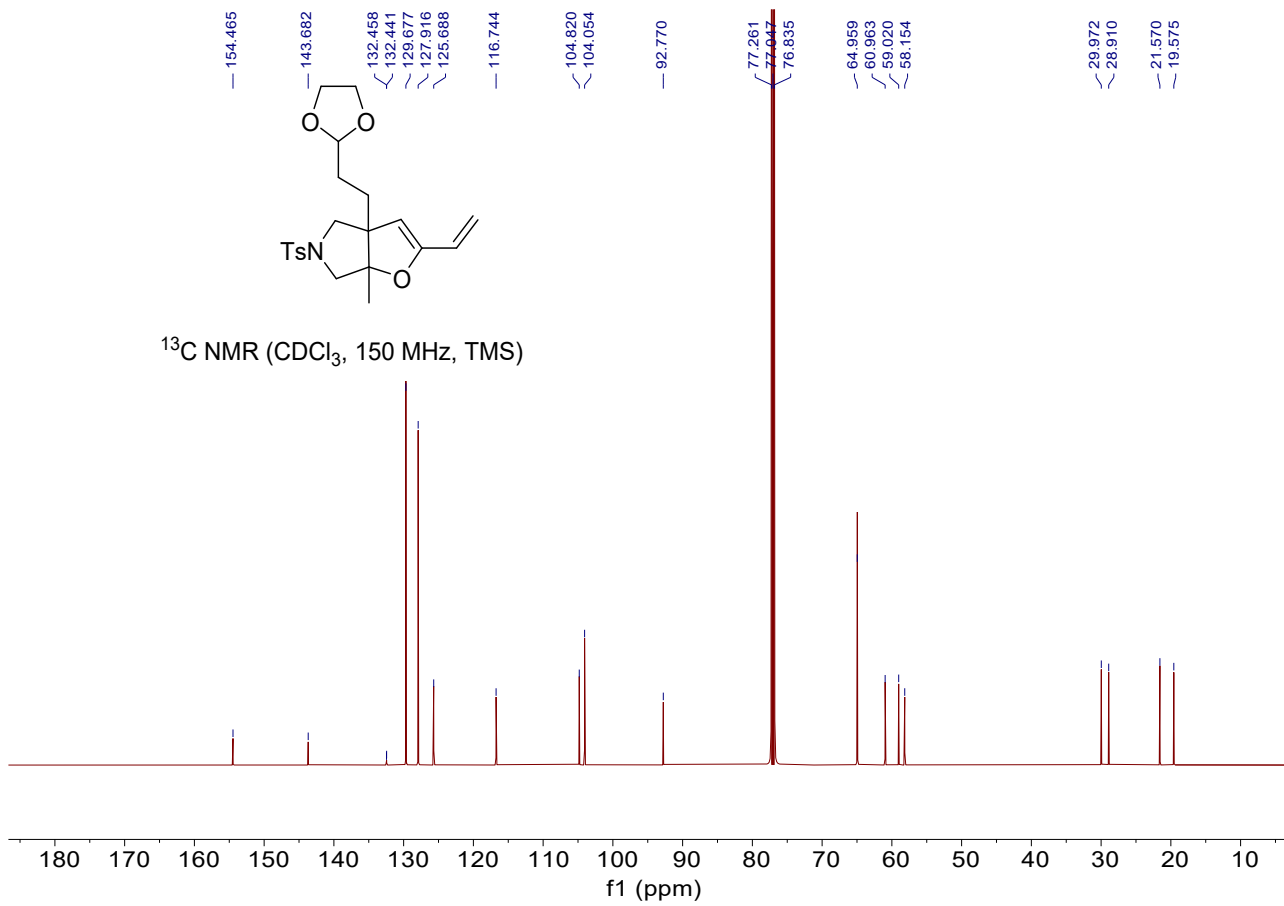

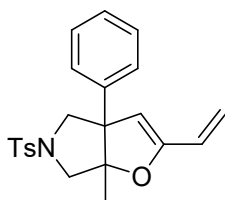

### 6a-methyl-3a-phenyl-5-tosyl-2-vinyl-3a,5,6,6a-tetrahydro-4H-furo[2,3-c]pyrrole (2i)

A yellow oil, 94% yield, 35.8 mg.  $^1\text{H}$  NMR ( $\text{CDCl}_3$ , TMS, 400 MHz)  $\delta$  7.73 (d,  $J = 8.0$  Hz, 2H), 7.35 (d,  $J = 8.0$  Hz, 2H), 7.34 – 7.19 (m, 5H), 6.20 (dd,  $J = 17.2, 11.0$  Hz, 1H), 5.50 (dd,  $J = 17.2, 1.6$  Hz, 1H), 5.24 (dd,  $J = 11.0, 1.6$  Hz, 1H), 4.93 (s, 1H), 3.85 (d,  $J = 10.0$  Hz, 1H), 3.56 (d,  $J = 10.4$  Hz, 1H), 3.43 (d,  $J = 10.0$  Hz, 1H), 3.31 (d,  $J = 10.4$  Hz, 1H), 2.46 (s, 3H), 0.89 (s, 3H).  $^{13}\text{C}$  NMR ( $\text{CDCl}_3$ , TMS, 100 MHz)  $\delta$  154.8, 143.9, 140.1, 132.3, 129.8, 128.4, 128.0, 127.4, 127.3, 125.6, 117.1, 106.4, 94.9, 63.4, 61.0, 60.8, 22.3, 21.6. IR (neat)  $\nu$  660, 815, 987, 1157, 1216, 1346, 1447, 2018, 2899, 2926, 2959  $\text{cm}^{-1}$ . HRMS (ESI) calcd. for  $\text{C}_{22}\text{H}_{23}\text{NO}_3\text{SNa}$  ( $\text{M}+\text{Na}$ ) $^+$ : 404.1291, Found: 404.1296.

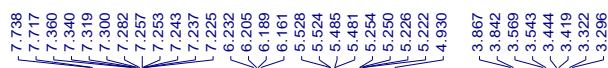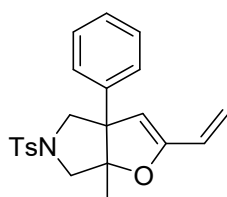

$^1\text{H}$  NMR ( $\text{CDCl}_3$ , 400 MHz, TMS)

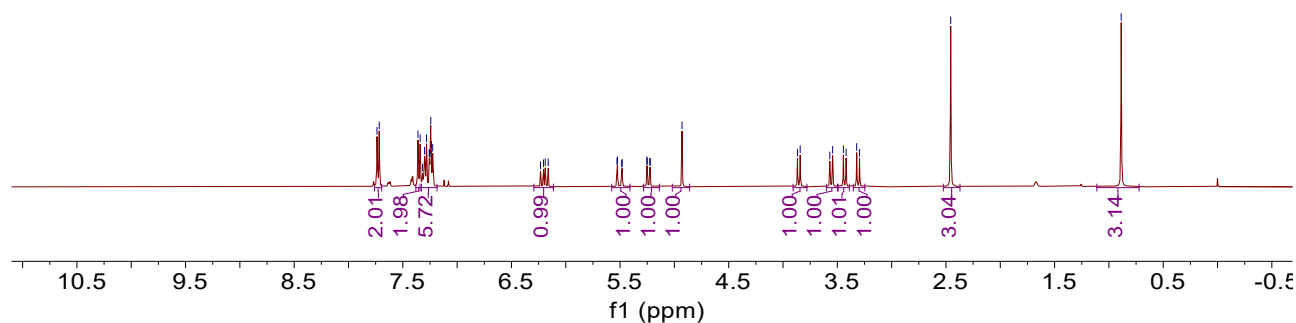

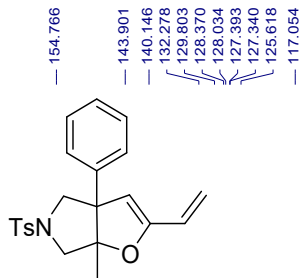

<sup>13</sup>C NMR (CDCl<sub>3</sub>, 100 MHz, TMS)

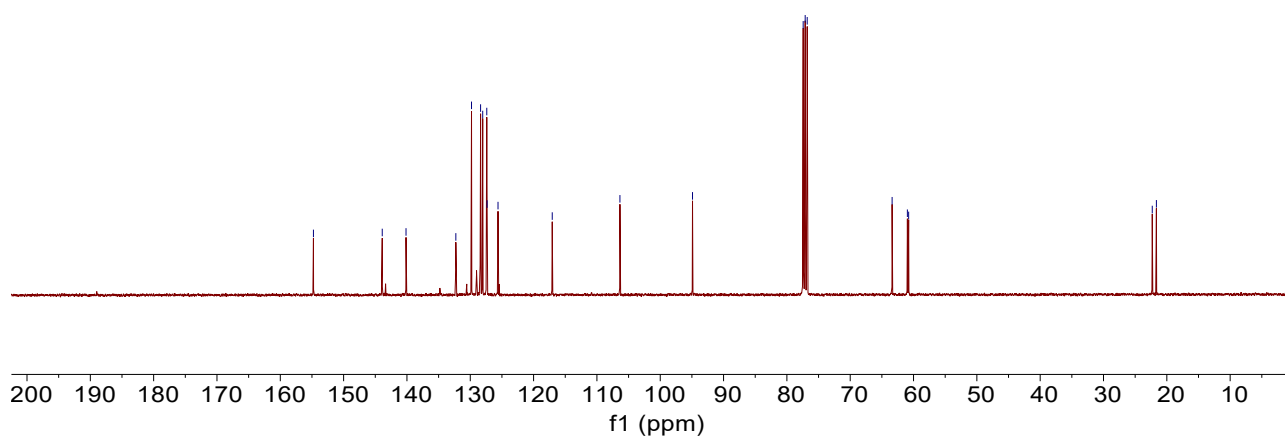



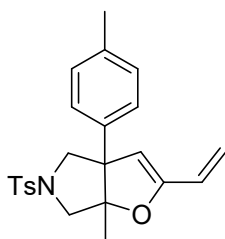

**6a-methyl-3a-(p-tolyl)-5-tosyl-2-vinyl-3a,5,6,6a-tetrahydro-4H-furo[2,3-c]pyrrole (2j)**

A yellow oil, 90% yield, 35.5 mg.  $^1\text{H}$  NMR ( $\text{CDCl}_3$ , TMS, 400 MHz)  $\delta$  7.72 (d,  $J = 8.0$  Hz, 2H), 7.34 (d,  $J = 8.0$  Hz, 2H), 7.13 – 7.07 (m, 4H), 6.19 (dd,  $J = 17.4, 11.0$  Hz, 1H), 5.50 (dd,  $J = 17.4, 1.6$  Hz, 1H), 5.23 (dd,  $J = 11.0, 1.6$  Hz, 1H), 4.91 (s, 1H), 3.82 (d,  $J = 10.0$  Hz, 1H), 3.56 (d,  $J = 10.5$  Hz, 1H), 3.43 (d,  $J = 10.0$  Hz, 1H), 3.28 (d,  $J = 10.5$  Hz, 1H), 2.46 (s, 3H), 2.31 (s, 3H), 0.89 (s, 3H).  $^{13}\text{C}$  NMR ( $\text{CDCl}_3$ , TMS, 100 MHz)  $\delta$  154.7, 143.8, 137.02, 137.00, 132.4, 129.8, 129.0, 128.0, 127.3, 125.7, 116.9, 106.6, 94.8, 63.1, 61.0, 60.7, 22.2, 21.6, 21.0. IR (neat)  $\nu$  665, 1163, 1348, 1596, 2846, 2929, 2974  $\text{cm}^{-1}$ . HRMS (ESI) calcd. for  $\text{C}_{23}\text{H}_{25}\text{NO}_3\text{SNa}$  ( $\text{M}+\text{Na}$ ) $^+$ : 418.1447, Found: 418.1447.

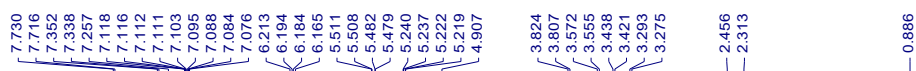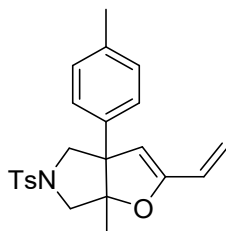

$^1\text{H}$  NMR ( $\text{CDCl}_3$ , 400 MHz, TMS)

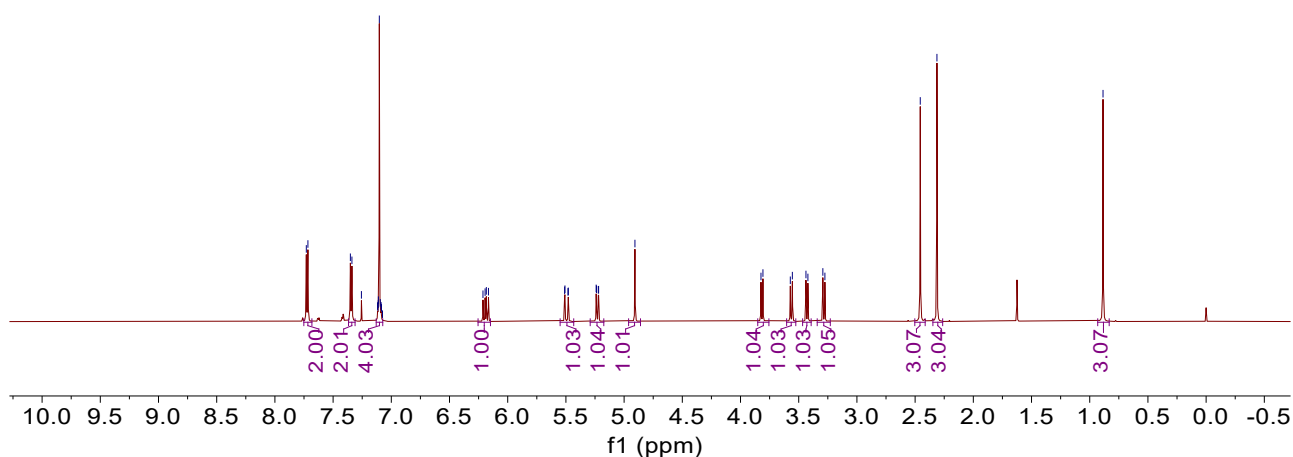

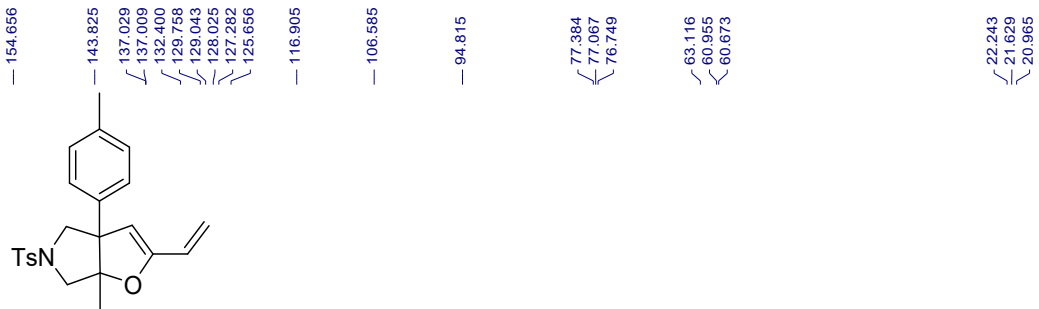

<sup>13</sup>C NMR (CDCl<sub>3</sub>, 100 MHz, TMS)

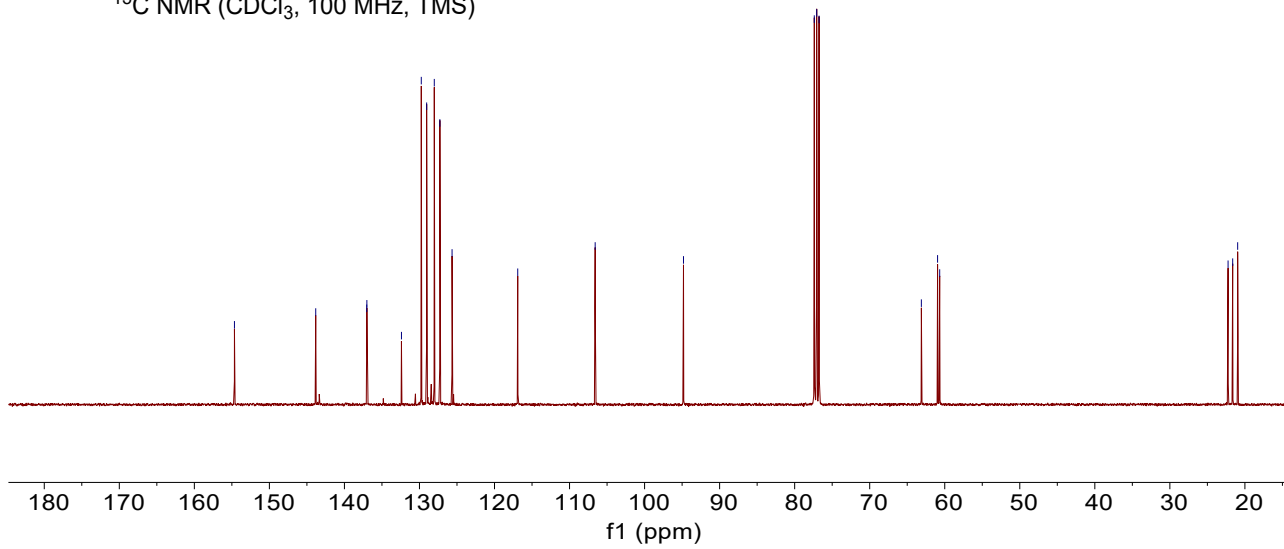

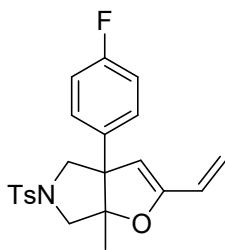

**3a-(4-fluorophenyl)-6a-methyl-5-tosyl-2-vinyl-3a,5,6,6a-tetrahydro-4H-furo[2,3-c]pyrrole (2k)**

A red oil, 90% yield, 35.9 mg.  $^1\text{H}$  NMR ( $\text{CDCl}_3$ , TMS, 400 MHz)  $\delta$  7.72 (d,  $J = 8.0$  Hz, 2H), 7.35 (d,  $J = 8.0$  Hz, 2H), 7.27 – 7.18 (m, 2H), 7.04 – 6.95 (m, 2H), 6.18 (dd,  $J = 17.2, 11.0$  Hz, 1H), 5.51 (dd,  $J = 17.2, 2.4$  Hz, 1H), 5.25 (dd,  $J = 11.0, 1.6$  Hz, 1H), 4.90 (s, 1H), 3.84 (d,  $J = 10.0$  Hz, 1H), 3.49 (d,  $J = 10.4$  Hz, 1H), 3.38 (d,  $J = 10.0$  Hz, 2H), 3.35 (d,  $J = 10.4$  Hz, 1H), 2.46 (s, 3H), 0.89 (s, 3H).  $^{13}\text{C}$  NMR ( $\text{CDCl}_3$ , TMS, 150 MHz)  $\delta$  161.9 (d,  $J_{\text{C-F}} = 244.8$  Hz), 154.8, 144.0, 136.00, 135.97, 132.2, 129.8, 129.0 (d,  $J_{\text{C-F}} = 7.8$  Hz), 128.0, 125.5, 117.3, 115.2 (d,  $J_{\text{C-F}} = 21.1$  Hz), 106.1, 94.8, 62.9, 60.91, 60.86, 22.4, 21.6.  $^{19}\text{F}$  NMR (564 MHz,  $\text{CDCl}_3$ )  $\delta$  -115.3. IR (neat)  $\nu$  663, 1163, 1349, 1598, 2857, 2928  $\text{cm}^{-1}$ . HRMS (ESI) calcd. for  $\text{C}_{22}\text{H}_{22}\text{NO}_3\text{SFNa}$  ( $\text{M}+\text{Na}$ ) $^+$ : 422.1197, Found: 422.1195.

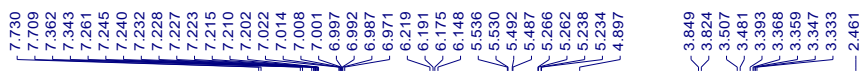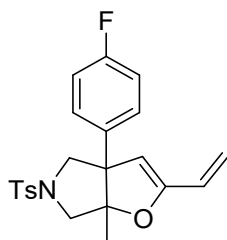

$^1\text{H}$  NMR ( $\text{CDCl}_3$ , 400 MHz, TMS)

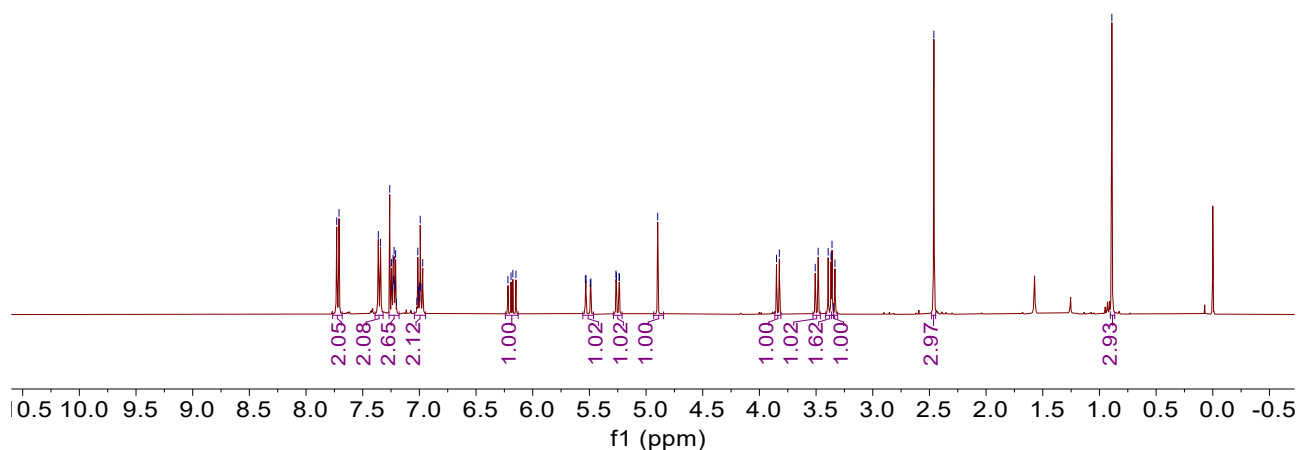

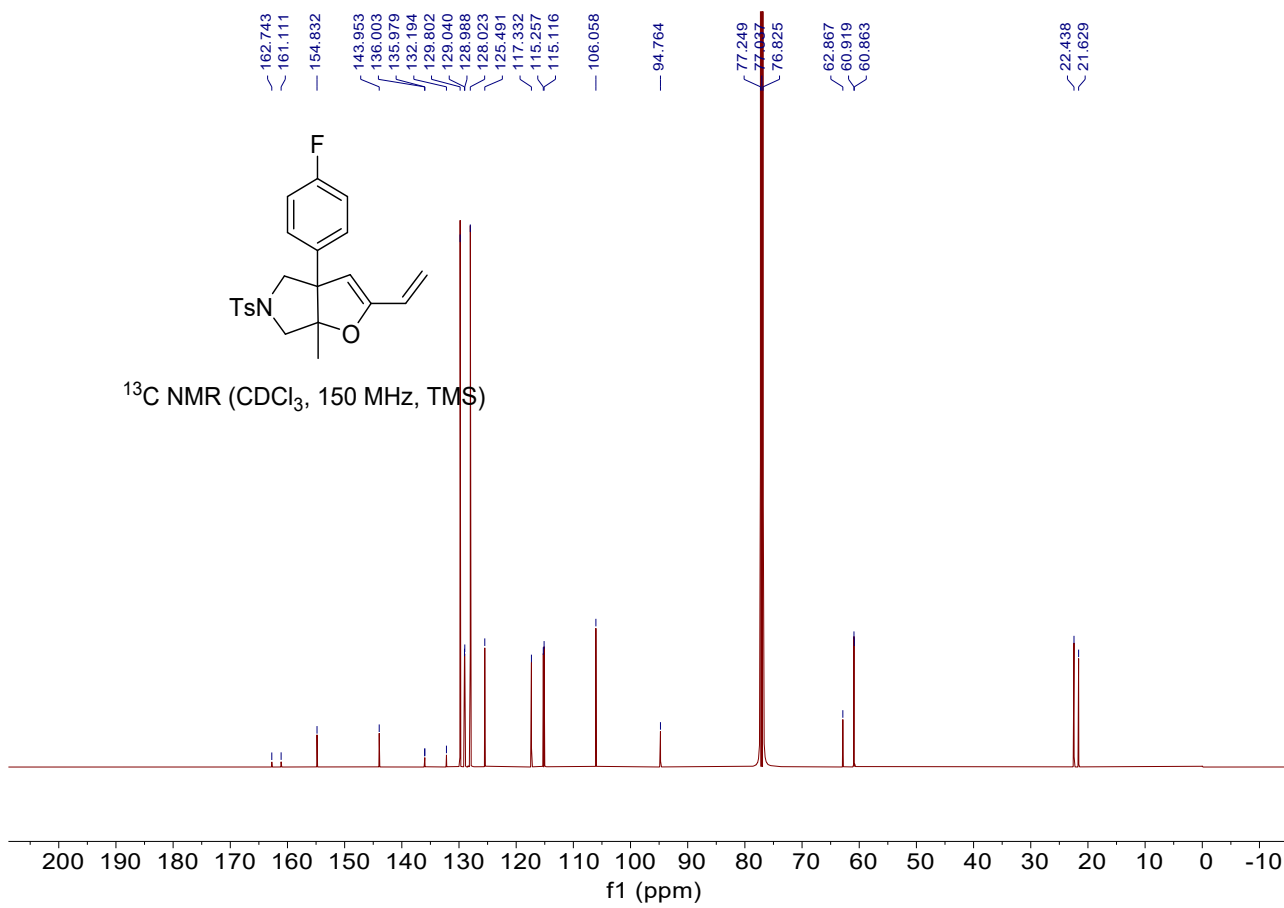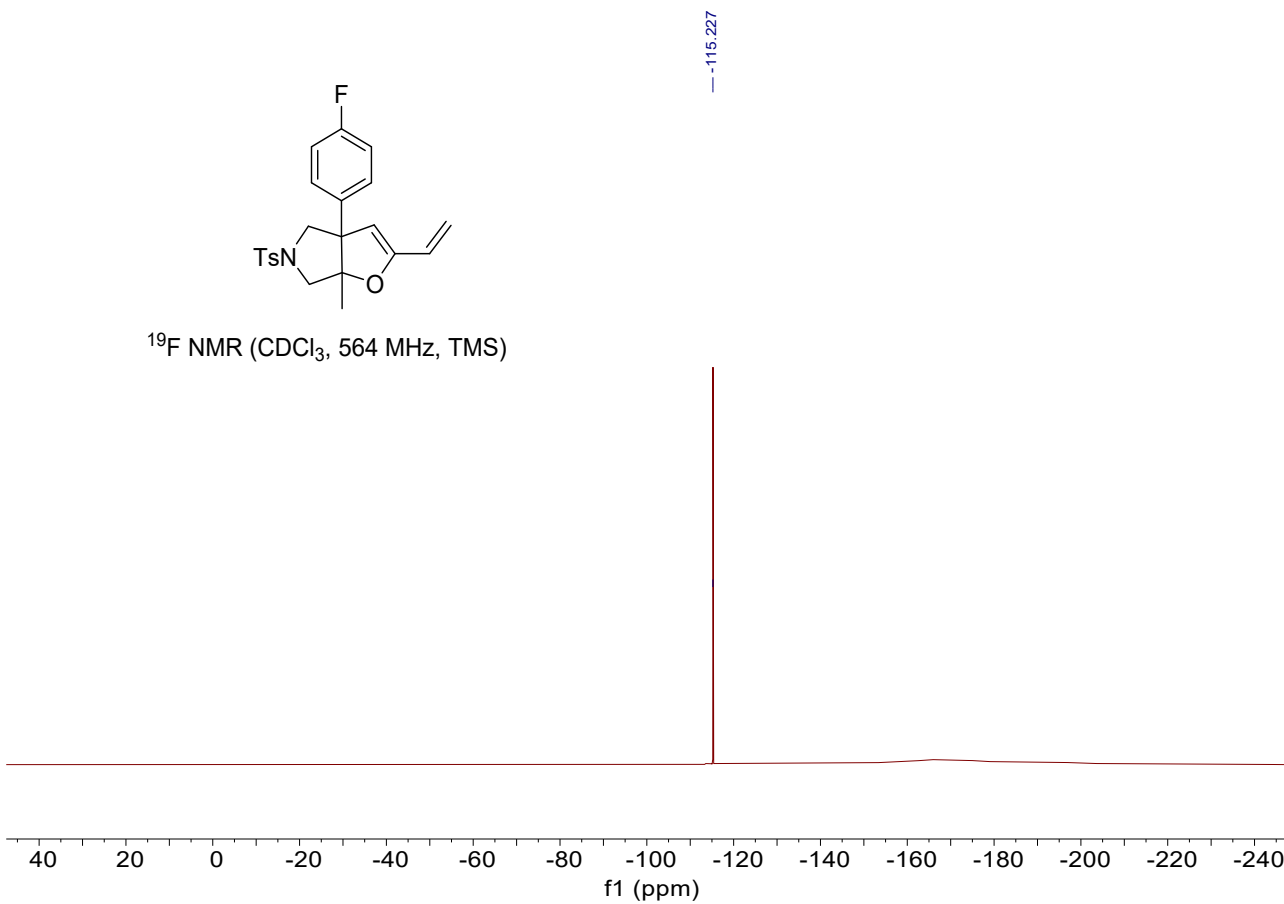

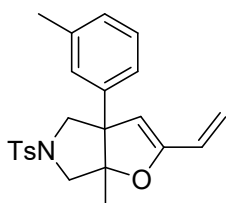

**6a-methyl-3a-(m-tolyl)-5-tosyl-2-vinyl-3a,5,6,6a-tetrahydro-4H-furo[2,3-c]pyrrole (21)**

A yellow oil, 90% yield, 35.4 mg.  $^1\text{H}$  NMR ( $\text{CDCl}_3$ , TMS, 400 MHz)  $\delta$  7.73 (d,  $J = 8.0$  Hz, 2H), 7.35 (d,  $J = 8.0$  Hz, 2H), 7.18 (t,  $J = 7.6$  Hz, 1H), 7.09 – 6.97 (m, 3H), 6.20 (dd,  $J = 17.4, 11.0$  Hz, 1H), 5.50 (dd,  $J = 17.4, 1.6$  Hz, 1H), 5.24 (dd,  $J = 10.8, 1.6$  Hz, 1H), 4.92 (s, 1H), 3.85 (d,  $J = 10.0$  Hz, 1H), 3.57 (d,  $J = 10.4$  Hz, 1H), 3.43 (d,  $J = 10.0$  Hz, 1H), 3.31 (d,  $J = 10.4$  Hz, 1H), 2.46 (s, 3H), 2.31 (s, 3H), 0.89 (s, 3H).  $^{13}\text{C}$  NMR ( $\text{CDCl}_3$ , TMS, 150 MHz)  $\delta$  154.6, 143.8, 140.1, 138.0, 132.5, 129.8, 128.2, 128.1, 128.0, 125.6, 124.4, 116.9, 106.6, 94.9, 63.3, 60.9, 60.8, 22.2, 21.61, 21.57. IR (neat)  $\nu$  665, 836, 1163, 1348, 1954, 2856, 2929  $\text{cm}^{-1}$ . HRMS (ESI) calcd. for  $\text{C}_{23}\text{H}_{25}\text{NO}_3\text{SNa}$  ( $\text{M}+\text{Na}$ ) $^+$ : 418.1447, Found: 418.1449.

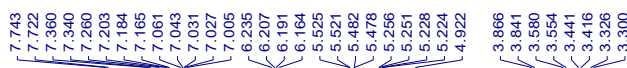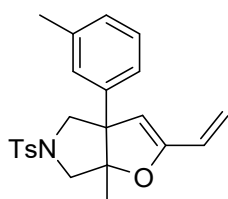

$^1\text{H}$  NMR ( $\text{CDCl}_3$ , 400 MHz, TMS)

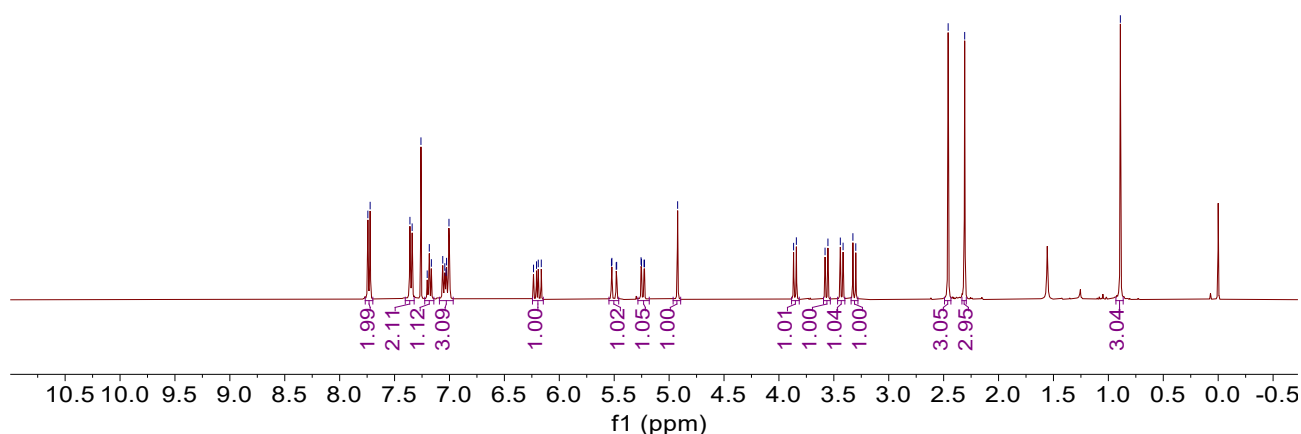

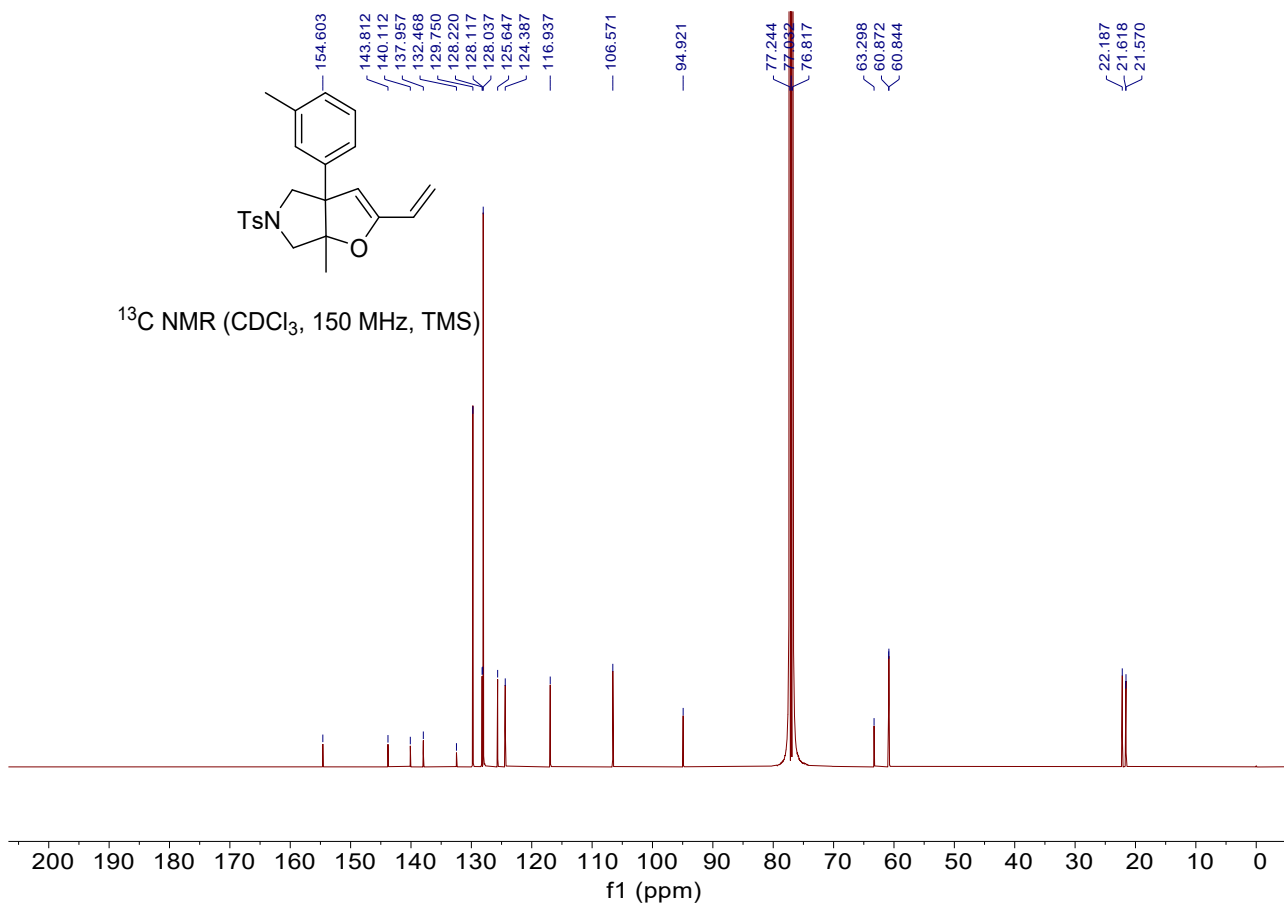

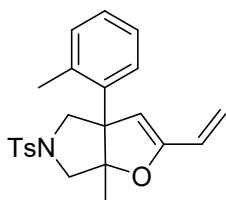

**6a-methyl-3a-(o-tolyl)-5-tosyl-2-vinyl-3a,5,6,6a-tetrahydro-4H-furo[2,3-c]pyrrole (2m)**

A yellow oil, 78% yield, 30.8 mg.  $^1\text{H}$  NMR ( $\text{CDCl}_3$ , TMS, 600 MHz)  $\delta$  7.73 (d,  $J = 8.0$  Hz, 2H), 7.36 (d,  $J = 8.0$  Hz, 2H), 7.25 – 7.21 (m, 1H), 7.20 – 7.07 (m, 3H), 6.10 (dd,  $J = 17.4$ , 11.0 Hz, 1H), 5.54 (dd,  $J = 17.4$ , 1.6 Hz, 1H), 5.22 (dd,  $J = 11.0$ , 1.6 Hz, 1H), 4.80 (s, 1H), 4.17 (d,  $J = 11.0$  Hz, 1H), 3.46 (d,  $J = 11.0$  Hz, 1H), 3.35 (d,  $J = 9.6$  Hz, 1H), 3.30 (d,  $J = 9.6$  Hz, 1H), 2.47 (s, 3H), 2.30 (s, 3H), 0.74 (s, 3H).  $^{13}\text{C}$  NMR ( $\text{CDCl}_3$ , TMS, 100 MHz)  $\delta$  152.3, 143.8, 136.9, 136.6, 132.7, 132.4, 129.8, 128.0, 127.7, 127.5, 126.6, 125.9, 125.7, 117.0, 109.5, 97.1, 63.2, 61.1, 58.4, 22.4, 22.1, 21.6. IR (neat)  $\nu$  664, 1220, 1356, 1596, 2857, 2926, 3002  $\text{cm}^{-1}$ . HRMS (ESI) calcd. for  $\text{C}_{23}\text{H}_{25}\text{NO}_3\text{SNa}$  ( $\text{M}+\text{Na}$ ) $^+$ : 418.1447, Found: 418.1443.

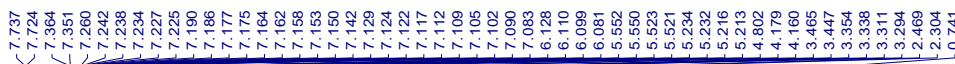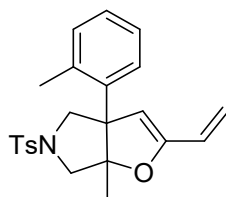

$^1\text{H}$  NMR ( $\text{CDCl}_3$ , 600 MHz, TMS)

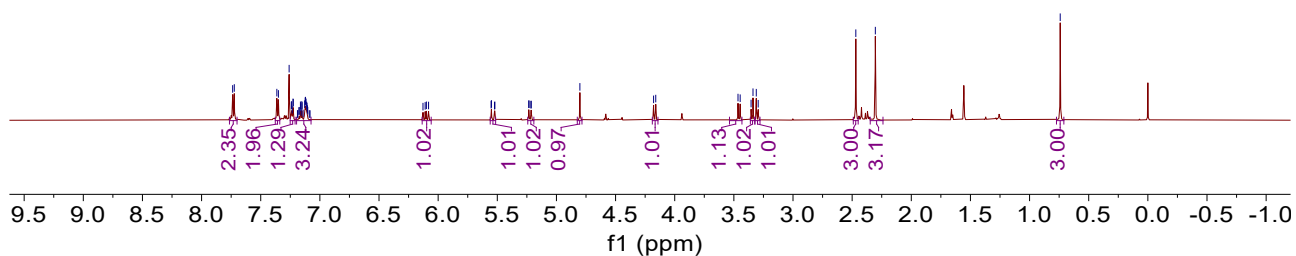

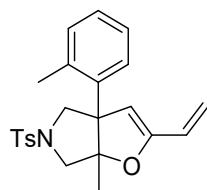

$^{13}\text{C}$  NMR ( $\text{CDCl}_3$ , 100 MHz, TMS)

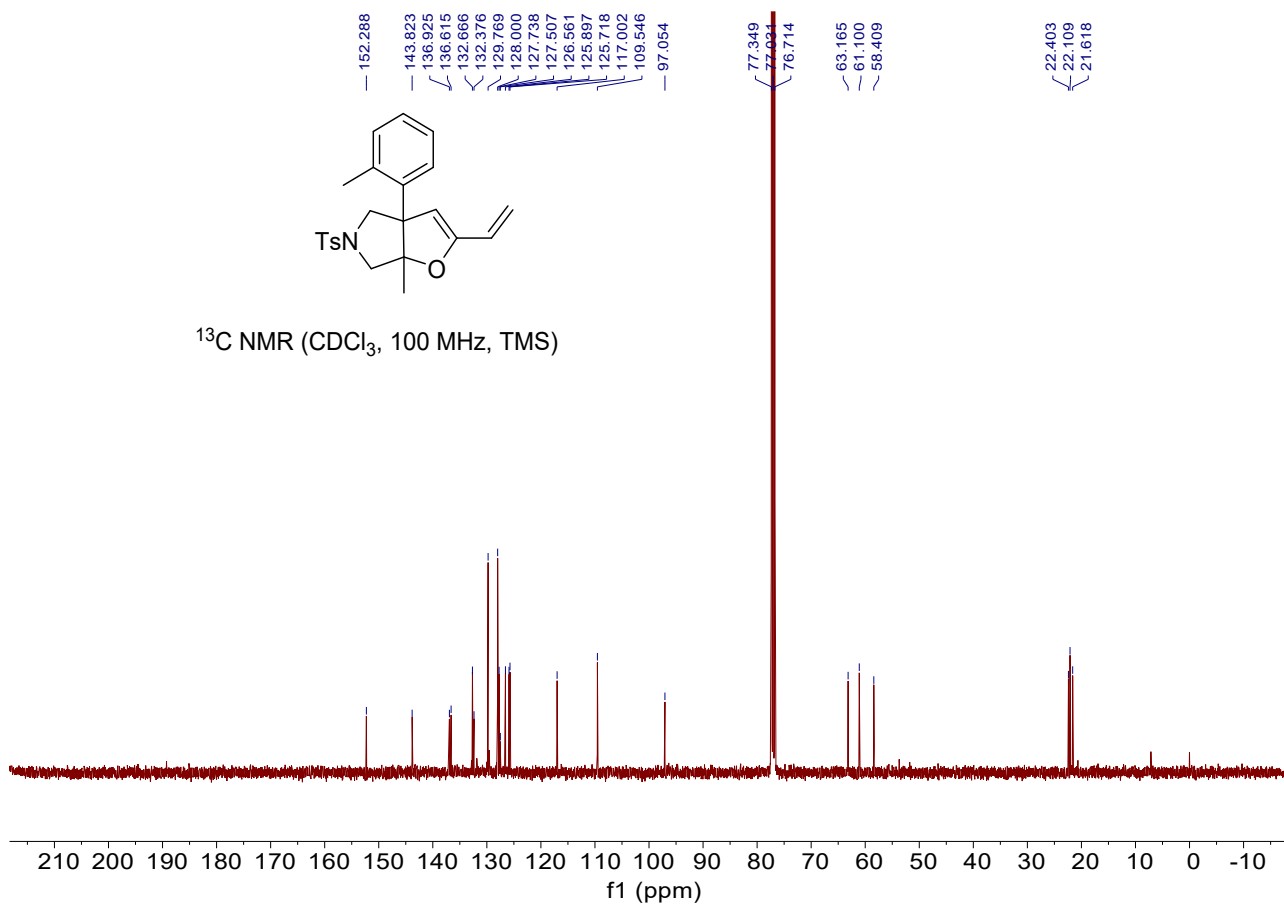



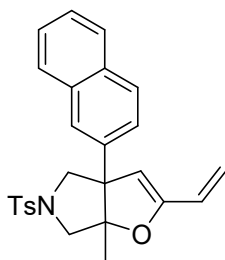

**6a-methyl-3a-(naphthalen-2-yl)-5-tosyl-2-vinyl-3a,5,6,6a-tetrahydro-4H-furo[2,3-c]pyrrole (2n)**

A red oil, 82% yield, 34.6 mg.  $^1\text{H}$  NMR ( $\text{CDCl}_3$ , TMS, 600 MHz)  $\delta$  7.82 – 7.74 (m, 5H), 7.67 (d,  $J$  = 2.0 Hz, 1H), 7.47 (td,  $J$  = 6.0, 3.2 Hz, 2H), 7.39 – 7.34 (m, 3H), 6.25 (dd,  $J$  = 17.4, 11.0 Hz, 1H), 5.54 (dd,  $J$  = 17.4, 1.6 Hz, 1H), 5.28 (dd,  $J$  = 11.0, 1.6 Hz, 1H), 5.04 (s, 1H), 4.00 (d,  $J$  = 10.0 Hz, 1H), 3.59 (d,  $J$  = 10.4 Hz, 1H), 3.50 (d,  $J$  = 10.0 Hz, 1H), 3.40 (d,  $J$  = 10.4 Hz, 1H), 2.48 (s, 3H), 0.93 (s, 3H).  $^{13}\text{C}$  NMR ( $\text{CDCl}_3$ , TMS, 100 MHz)  $\delta$  154.8, 143.9, 137.6, 133.0, 132.5, 132.4, 129.8, 128.09, 128.06, 128.05, 127.5, 126.4, 126.22, 126.20, 125.7, 125.4, 117.2, 106.4, 95.0, 63.5, 61.0, 60.8, 22.3, 21.7. IR (neat)  $\nu$  663, 818, 1162, 1347, 1595, 2866, 2927, 3047  $\text{cm}^{-1}$ . HRMS (ESI) calcd. for  $\text{C}_{26}\text{H}_{25}\text{NO}_3\text{SNa}$  ( $\text{M}+\text{Na}$ ) $^+$ : 454.1447, Found: 454.1446.

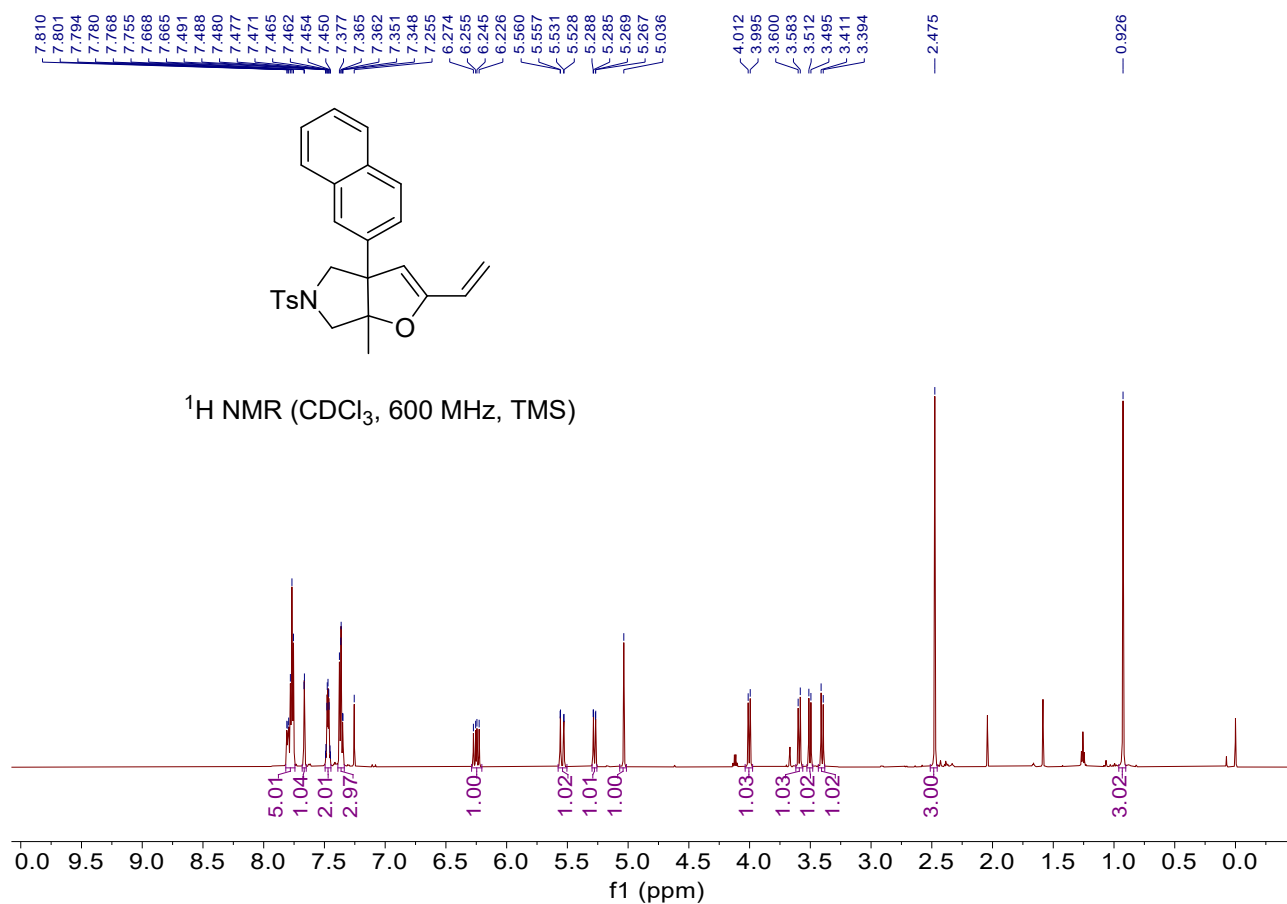

154.831  
143.911  
137.644  
132.979  
132.453  
132.434  
129.817  
128.094  
128.069  
128.053  
127.490  
126.364  
126.223  
126.203  
125.656  
125.429  
117.201  
106.420

94.973

77.372  
77.055  
76.737

63.519  
61.006  
60.847

22.347  
21.650

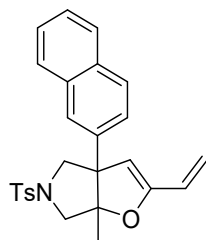

<sup>13</sup>C NMR (CDCl<sub>3</sub>, 100 MHz, TMS)

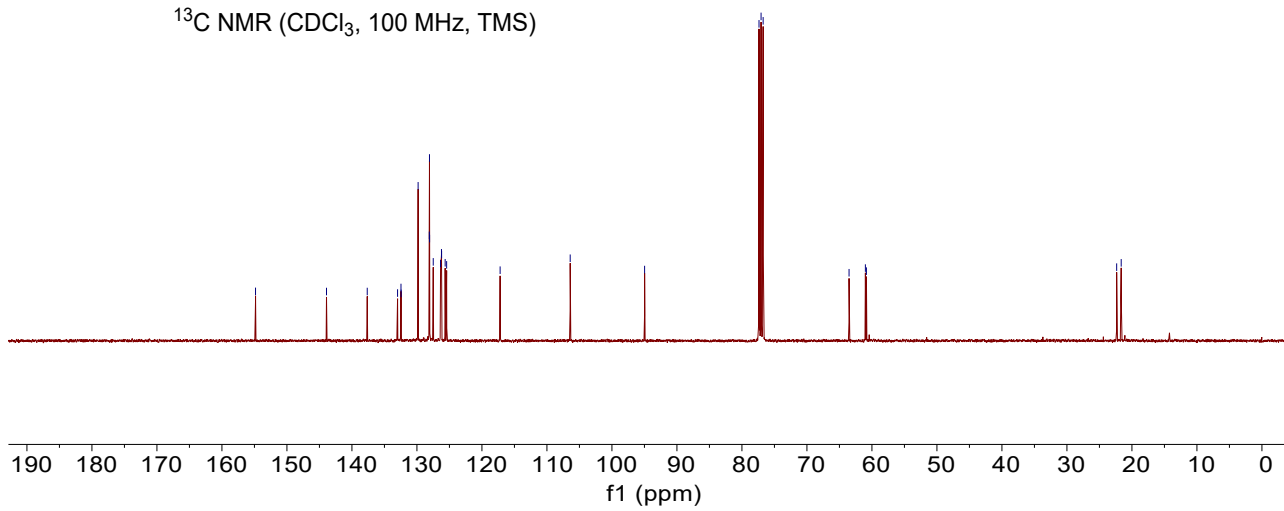

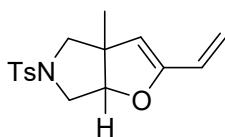

### 3a-methyl-5-tosyl-2-vinyl-3a,5,6,6a-tetrahydro-4H-furo[2,3-c]pyrrole (2o)

A colorless oil, 80% yield, 22.4 mg.  $^1\text{H}$  NMR ( $\text{CDCl}_3$ , TMS, 400 MHz)  $\delta$  7.62 (d,  $J = 8.0$  Hz, 2H), 7.30 (d,  $J = 8.0$  Hz, 2H), 6.07 (dd,  $J = 17.4, 11.0$  Hz, 1H), 5.44 (dd,  $J = 17.4, 1.6$  Hz, 1H), 5.16 (dd,  $J = 11.0, 1.6$  Hz, 1H), 4.80 (s, 1H), 4.07 (t,  $J = 3.6$  Hz, 1H), 3.56 – 3.48 (m, 1H), 3.29 (dd,  $J = 11.9, 1.6$  Hz, 1H), 2.77 – 2.68 (m, 1H), 2.49 – 2.40 (m, 5H), 1.25 (s, 3H).  $^{13}\text{C}$  NMR ( $\text{CDCl}_3$ , TMS, 100 MHz)  $\delta$  155.4, 143.4, 134.0, 129.7, 127.5, 125.9, 116.2, 110.3, 83.6, 52.8, 45.1, 41.5, 25.5, 22.0, 21.5. IR (neat)  $\nu$  815, 987, 1157, 1216, 1346, 1447, 2018, 2869, 2926, 2959  $\text{cm}^{-1}$ . HRMS (ESI) calcd. for  $\text{C}_{16}\text{H}_{19}\text{NO}_3\text{SNa}$  ( $\text{M}+\text{Na}$ ) $^+$ : 328.0978, Found: 328.0979.

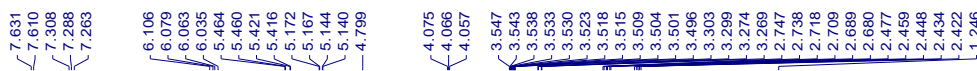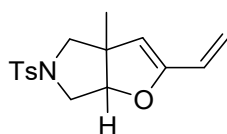

$^1\text{H}$  NMR ( $\text{CDCl}_3$ , 400 MHz, TMS)

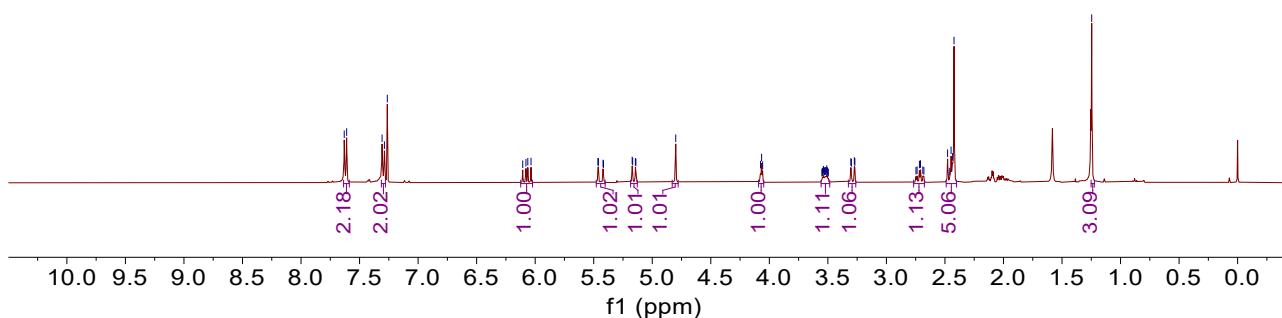

— 155.413  
— 143.409  
~ 133.975  
~ 129.704  
~ 127.500  
~ 125.927  
— 116.215  
— 110.320

C=C1C(=O)N(C1)C(C)C

H  
<sup>13</sup>C NMR (CDCl<sub>3</sub>, 100 MHz, TMS)

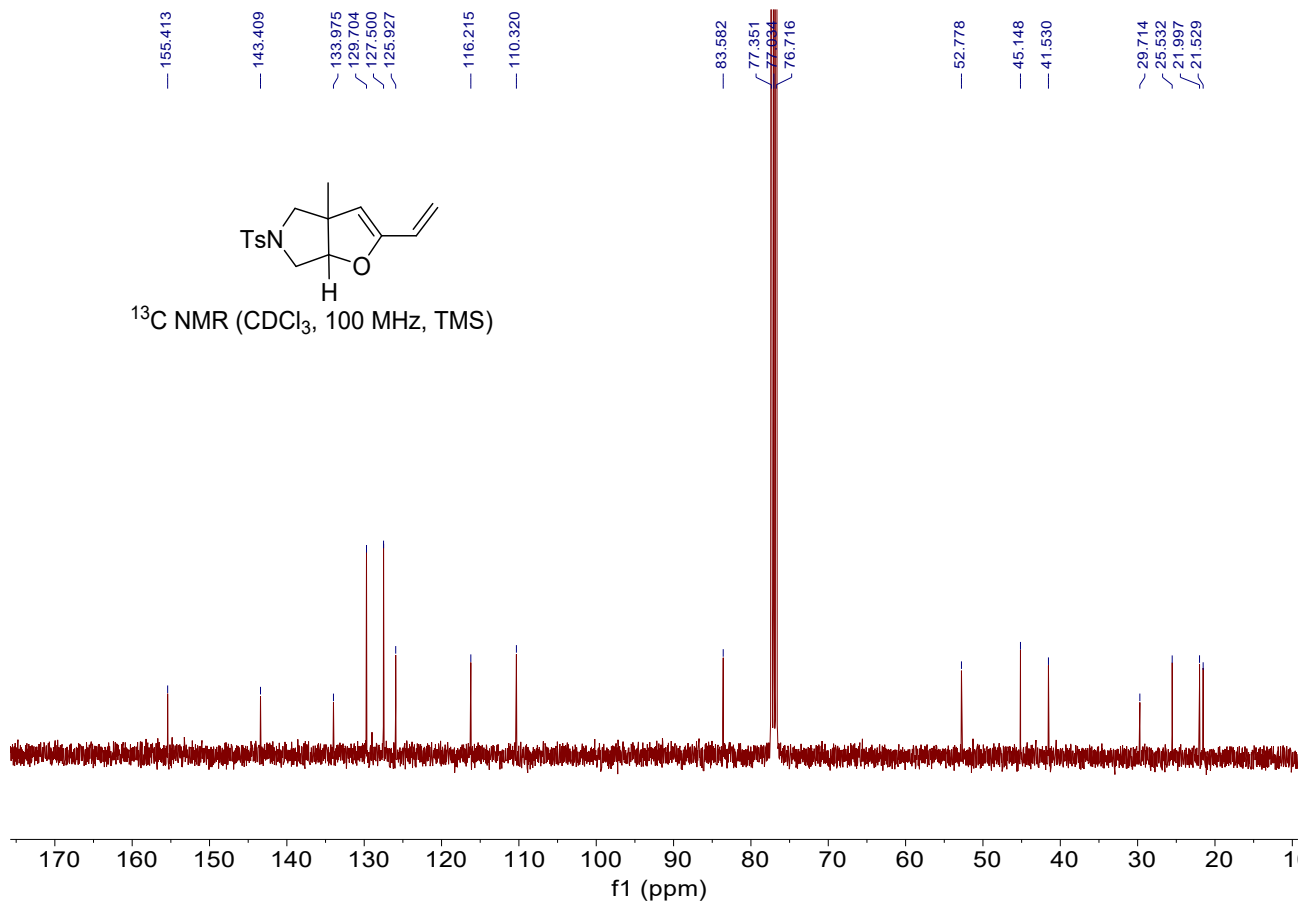

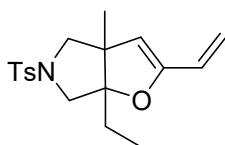

### 6a-ethyl-3a-methyl-5-tosyl-2-vinyl-3a,5,6,6a-tetrahydro-4H-furo[2,3-c]pyrrole (2p)

A colorless oil, 86% yield, 28.6 mg.  $^1\text{H}$  NMR ( $\text{CDCl}_3$ , TMS, 600 MHz)  $\delta$  7.67 (d,  $J = 8.0$  Hz, 2H), 7.31 (d,  $J = 8.0$  Hz, 2H), 6.06 (dd,  $J = 17.4, 10.8$  Hz, 1H), 5.47 (dd,  $J = 17.4, 1.8$  Hz, 1H), 5.17 (dd,  $J = 10.8, 1.8$  Hz, 1H), 4.62 (s, 1H), 3.65 (d,  $J = 10.8$  Hz, 1H), 3.45 (d,  $J = 9.6$  Hz, 1H), 2.91 (d,  $J = 10.8$  Hz, 1H), 2.72 (d,  $J = 9.6$  Hz, 1H), 2.43 (s, 3H), 1.68 (dq,  $J = 14.4, 7.2$  Hz, 1H), 1.38 (dq,  $J = 14.4, 7.2$  Hz, 1H), 1.07 (s, 3H), 1.00 (t,  $J = 7.2$  Hz, 3H).  $^{13}\text{C}$  NMR ( $\text{CDCl}_3$ , TMS, 100 MHz)  $\delta$  153.7, 143.6, 132.6, 129.6, 127.9, 125.7, 116.4, 107.9, 94.9, 60.9, 58.7, 55.5, 26.7, 21.6, 19.9, 8.4. IR (neat)  $\nu$  664, 1162, 1346, 1579, 2883, 2953, 2975  $\text{cm}^{-1}$ . HRMS (ESI) calcd. for  $\text{C}_{18}\text{H}_{24}\text{NO}_3\text{S}$  ( $\text{M}+\text{H}$ ) $^+$ : 334.1471, Found: 334.1464.

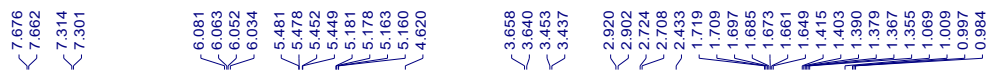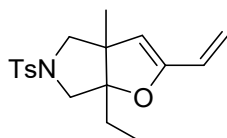

$^1\text{H}$  NMR ( $\text{CDCl}_3$ , 600 MHz, TMS)

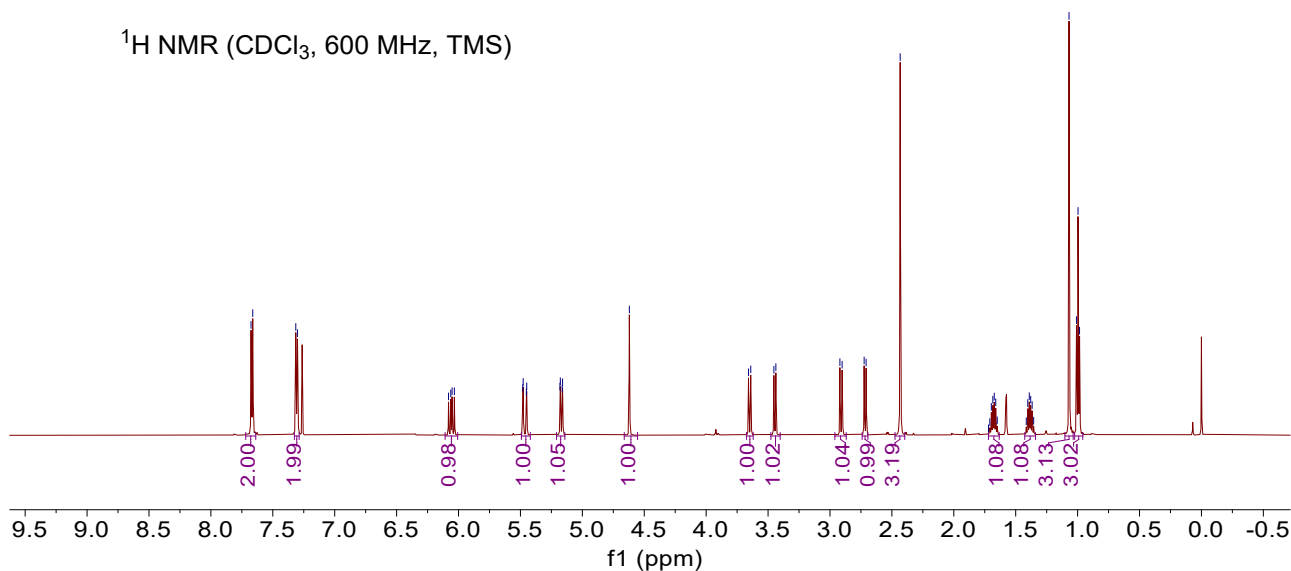

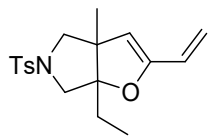

$^{13}\text{C}$  NMR ( $\text{CDCl}_3$ , 100 MHz, TMS)

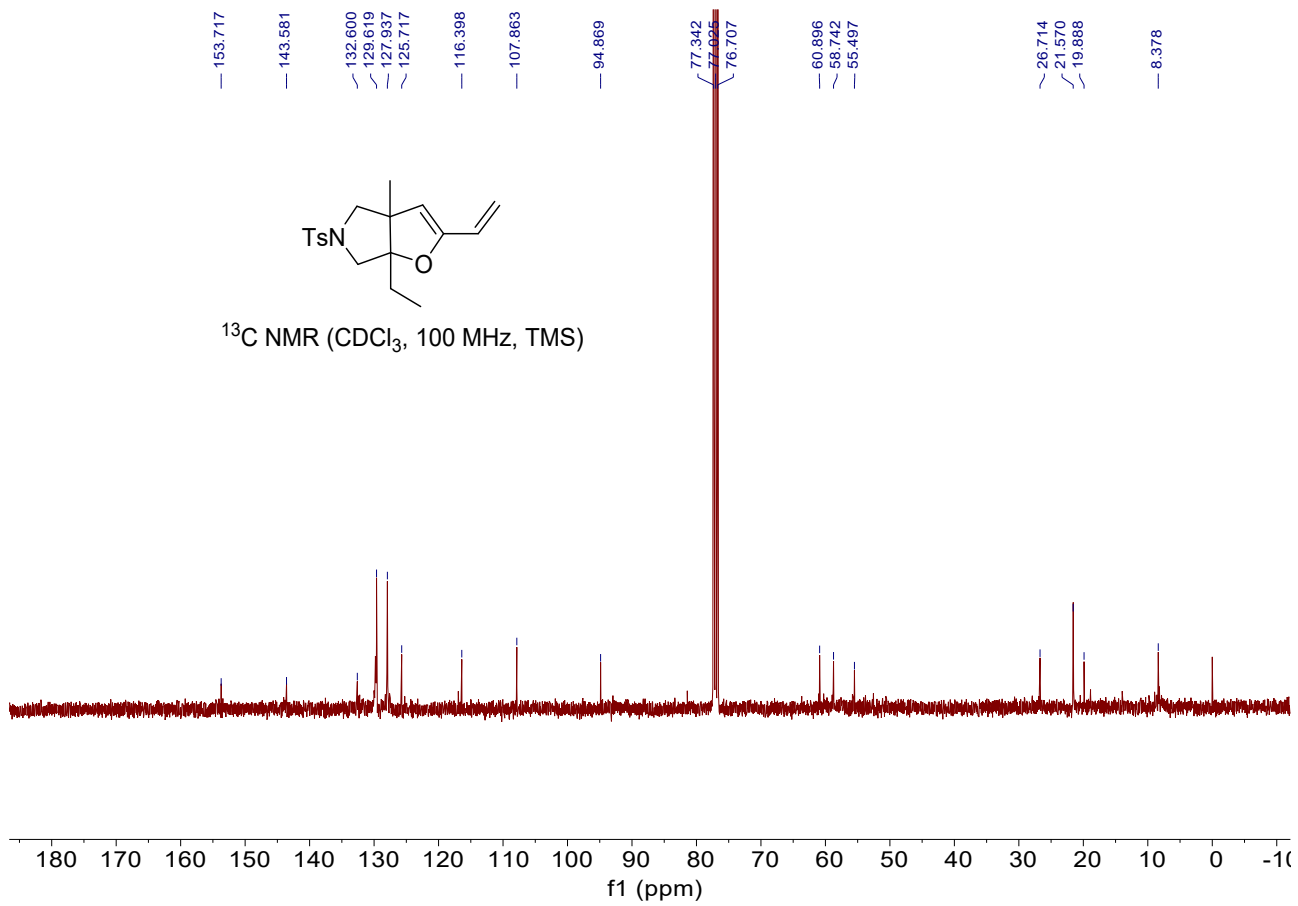

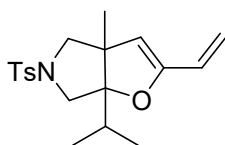

**6a-isopropyl-3a-methyl-5-tosyl-2-vinyl-3a,5,6,6a-tetrahydro-4H-furo[2,3-c]pyrrole (2q)**

A colorless oil, 80% yield, 27.7 mg.  $^1\text{H}$  NMR ( $\text{CDCl}_3$ , TMS, 600 MHz)  $\delta$  7.68 (d,  $J = 8.0$  Hz, 2H), 7.30 (d,  $J = 8.0$  Hz, 2H), 6.02 (dd,  $J = 17.2, 10.8$  Hz, 1H), 5.47 (dd,  $J = 17.2, 1.6$  Hz, 1H), 5.16 (dd,  $J = 10.8, 1.6$  Hz, 1H), 4.60 (s, 1H), 3.53 (d,  $J = 10.8$  Hz, 1H), 3.48 (d,  $J = 9.6$  Hz, 1H), 3.07 (d,  $J = 10.8$  Hz, 1H), 2.79 (d,  $J = 9.6$  Hz, 1H), 2.43 (s, 3H), 1.91 (hept,  $J = 6.8$  Hz, 1H), 1.14 (s, 3H), 0.96 (d,  $J = 6.8$  Hz, 3H), 0.84 (d,  $J = 6.8$  Hz, 3H).  $^{13}\text{C}$  NMR ( $\text{CDCl}_3$ , TMS, 150 MHz)  $\delta$  153.8, 143.5, 132.9, 129.6, 127.9, 125.6, 116.3, 109.1, 96.7, 61.2, 56.9, 55.5, 31.4, 21.6, 19.5, 18.0, 17.4. IR (neat)  $\nu$  667, 829, 1164, 1347, 1592, 2866, 2934, 2969  $\text{cm}^{-1}$ . HRMS (ESI) calcd. for  $\text{C}_{19}\text{H}_{25}\text{NO}_3\text{SNa}$  ( $\text{M}+\text{Na}$ ) $^+$ : 370.1447, Found: 370.1440.

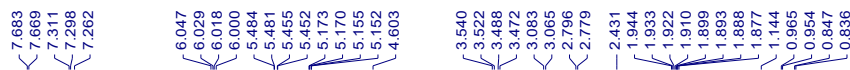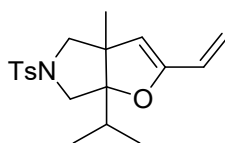

$^1\text{H}$  NMR ( $\text{CDCl}_3$ , 600 MHz, TMS)

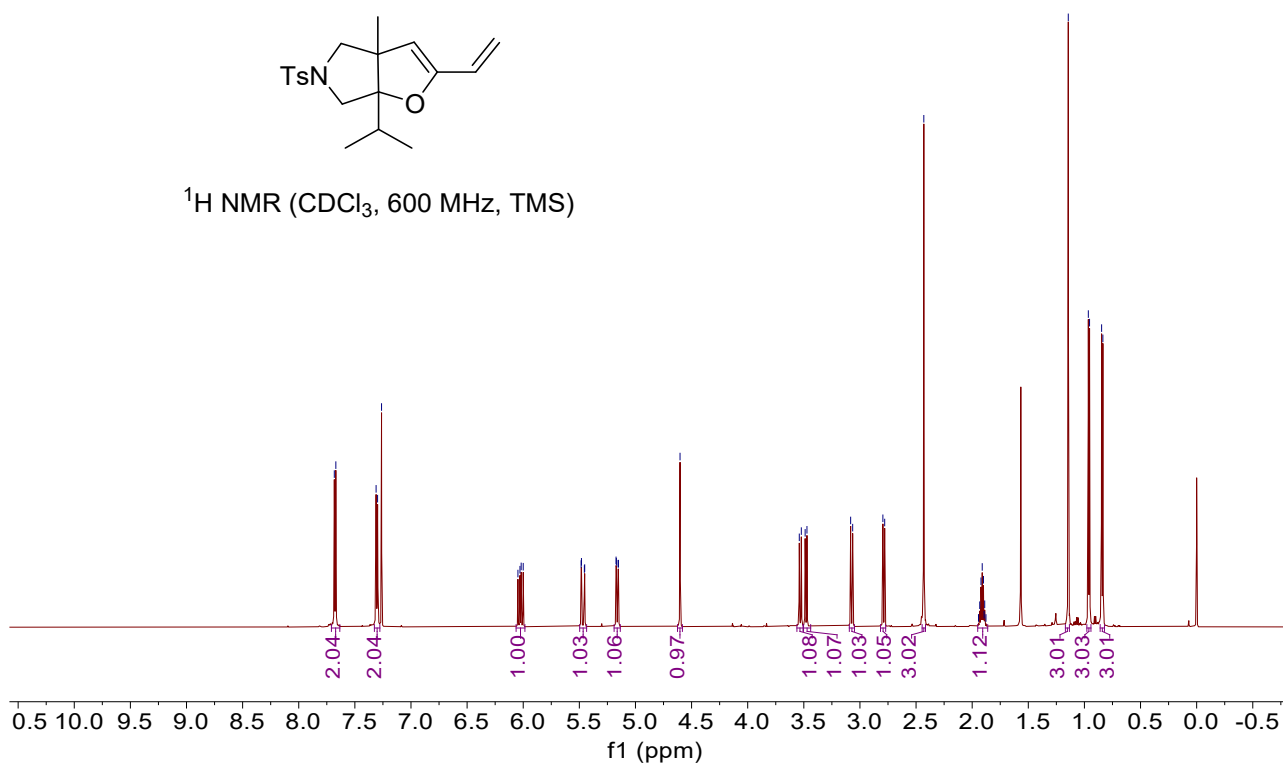

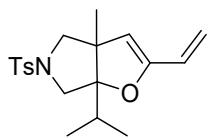

$^{13}\text{C}$  NMR ( $\text{CDCl}_3$ , 150 MHz, TMS)

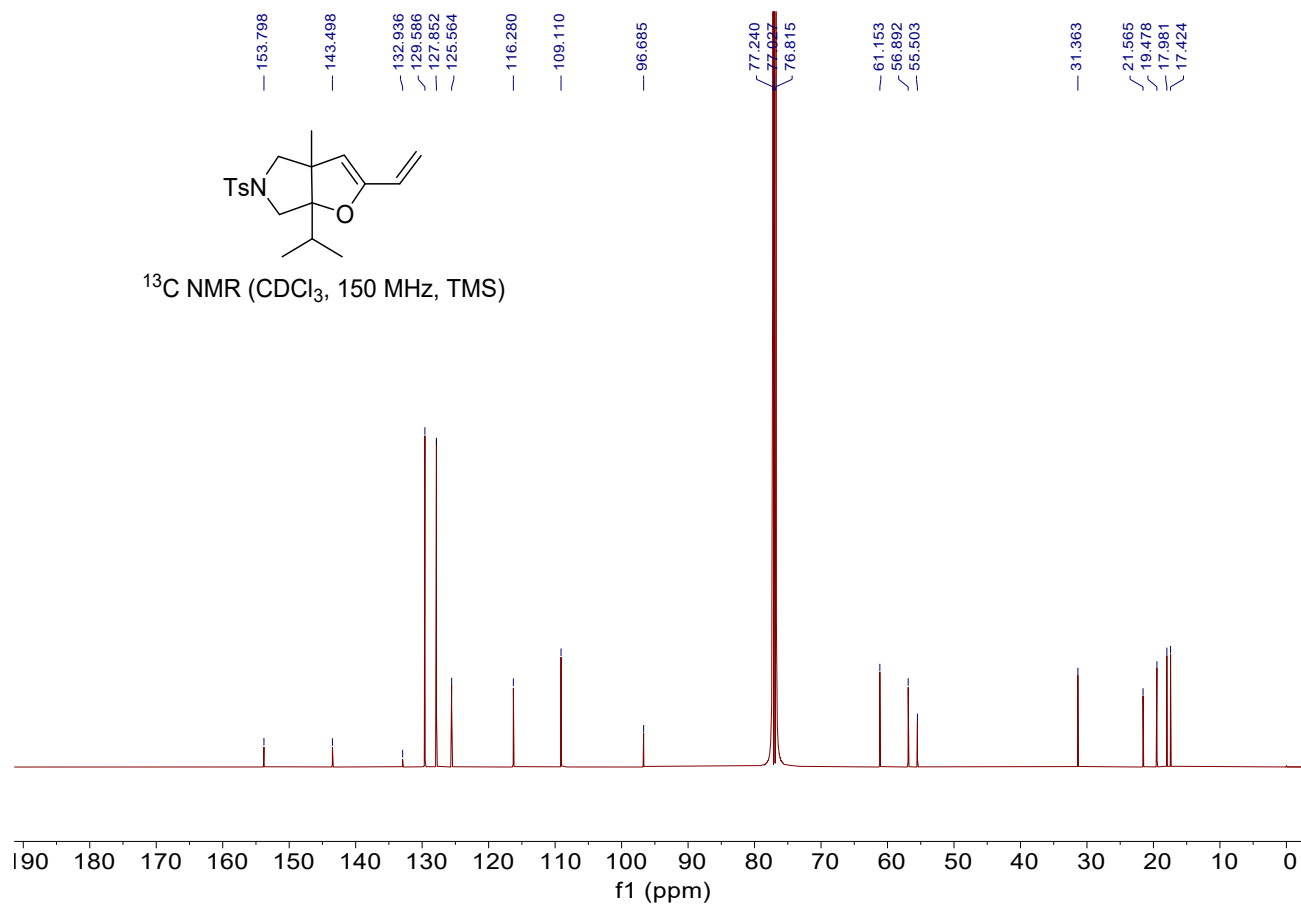



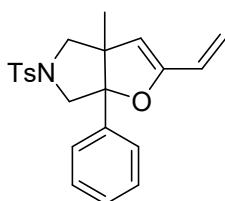

### 3a-methyl-6a-phenyl-5-tosyl-2-vinyl-3a,5,6,6a-tetrahydro-4H-furo[2,3-c]pyrrole (2r)

A yellow oil, 82% yield, 31.4 mg.  $^1\text{H}$  NMR ( $\text{CDCl}_3$ , TMS, 600 MHz)  $\delta$  7.73 (d,  $J = 8.0$  Hz, 2H), 7.36 (d,  $J = 8.0$  Hz, 2H), 7.32 – 7.24 (m, 3H), 7.23 – 7.19 (m, 2H), 6.14 (dd,  $J = 17.4$ , 11.0 Hz, 1H), 5.62 (dd,  $J = 17.4$ , 1.6 Hz, 1H), 5.27 (dd,  $J = 11.0$ , 1.6 Hz, 1H), 4.70 (s, 1H), 3.80 (d,  $J = 11.0$  Hz, 1H), 3.70 (d,  $J = 11.0$  Hz, 1H), 3.50 (d,  $J = 9.6$  Hz, 1H), 3.12 (d,  $J = 9.6$  Hz, 1H), 2.47 (s, 3H), 0.65 (s, 3H).  $^{13}\text{C}$  NMR ( $\text{CDCl}_3$ , TMS, 150 MHz)  $\delta$  153.5, 143.8, 139.0, 132.54, 132.52, 129.8, 128.2, 128.0, 127.7, 125.5, 117.0, 108.2, 95.5, 61.6, 60.5, 58.2, 22.4, 21.6. IR (neat)  $\nu$  665, 765, 1285, 1347, 1596, 2956, 2971  $\text{cm}^{-1}$ . HRMS (ESI) calcd. for  $\text{C}_{22}\text{H}_{23}\text{NO}_3\text{SNa}$  ( $\text{M}+\text{Na}$ ) $^+$ : 404.1291, Found: 404.1285.

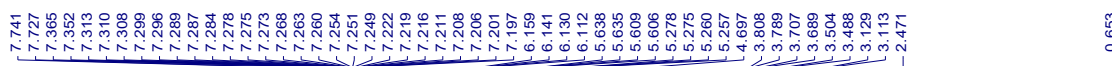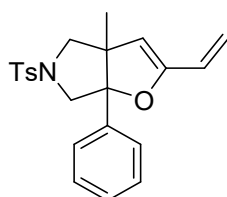

$^1\text{H}$  NMR ( $\text{CDCl}_3$ , 600 MHz, TMS)

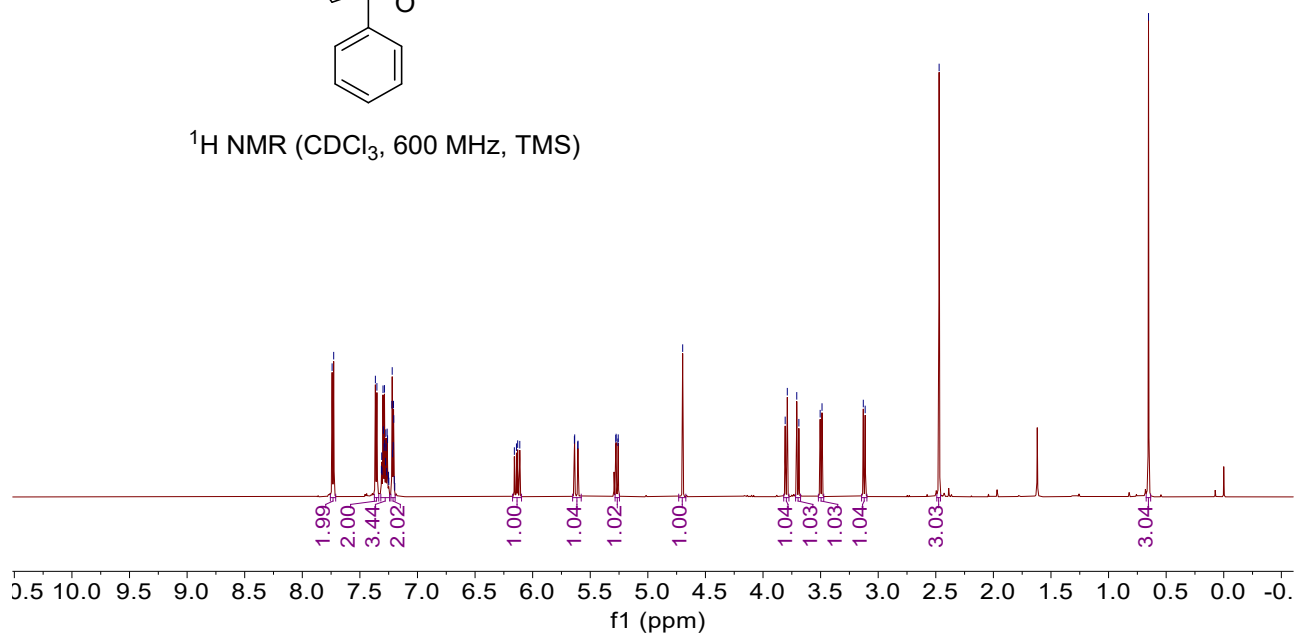

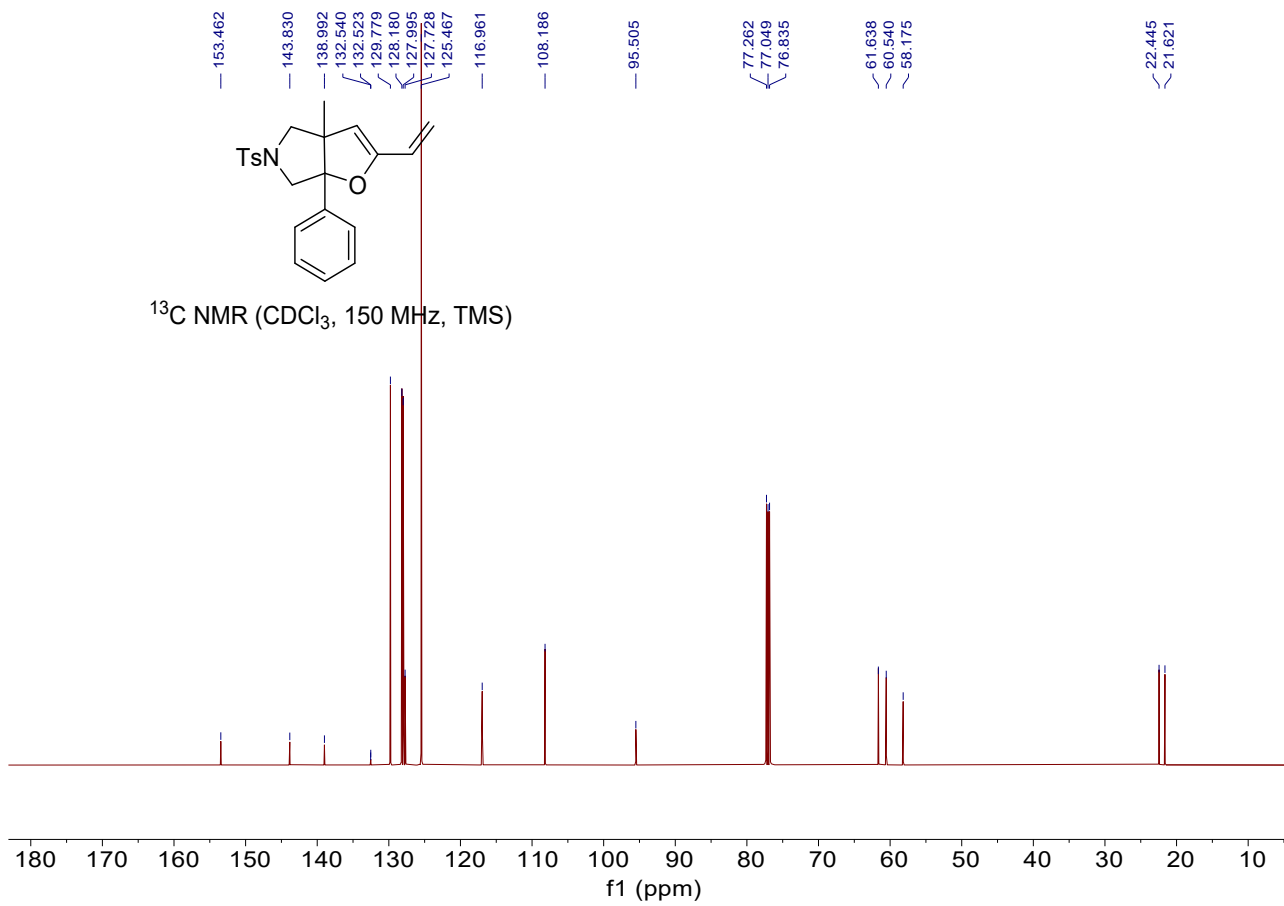

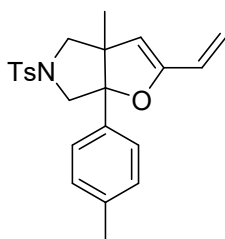

**3a-methyl-6a-(p-tolyl)-5-tosyl-2-vinyl-3a,5,6,6a-tetrahydro-4H-furo[2,3-c]pyrrole (2s)**

A yellow oil, 80% yield, 31.6 mg.  $^1\text{H}$  NMR ( $\text{CDCl}_3$ , TMS, 400 MHz)  $\delta$  7.73 (d,  $J = 8.0$  Hz, 2H), 7.36 (d,  $J = 8.0$  Hz, 2H), 7.02 – 7.14 (m, 4H), 6.13 (dd,  $J = 17.4, 11.0$  Hz, 1H), 5.61 (dd,  $J = 17.4, 1.2$  Hz, 1H), 5.26 (dd,  $J = 10.8, 1.6$  Hz, 1H), 4.69 (s, 1H), 3.76 (d,  $J = 11.0$  Hz, 1H), 3.68 (d,  $J = 11.0$  Hz, 1H), 3.49 (d,  $J = 9.6$  Hz, 1H), 3.09 (d,  $J = 9.6$  Hz, 1H), 2.47 (s, 3H), 2.32 (s, 3H), 0.65 (s, 3H).  $^{13}\text{C}$  NMR ( $\text{CDCl}_3$ , TMS, 100 MHz)  $\delta$  153.5, 143.8, 137.4, 135.9, 132.5, 129.8, 128.9, 128.0, 125.5, 125.4, 116.9, 108.2, 95.6, 61.6, 60.5, 58.0, 22.5, 21.6, 21.1. IR (neat)  $\nu$  666, 815, 1164, 1326, 1596, 2841, 2929, 2981  $\text{cm}^{-1}$ . HRMS (ESI) calcd. for  $\text{C}_{23}\text{H}_{25}\text{NO}_3\text{SNa}$  ( $\text{M}+\text{Na}$ ) $^+$ : 418.1447, Found: 418.1442.

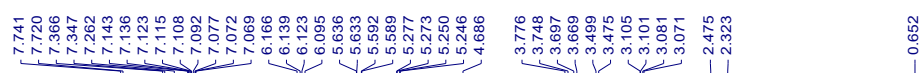

$^1\text{H}$  NMR ( $\text{CDCl}_3$ , 400 MHz, TMS)

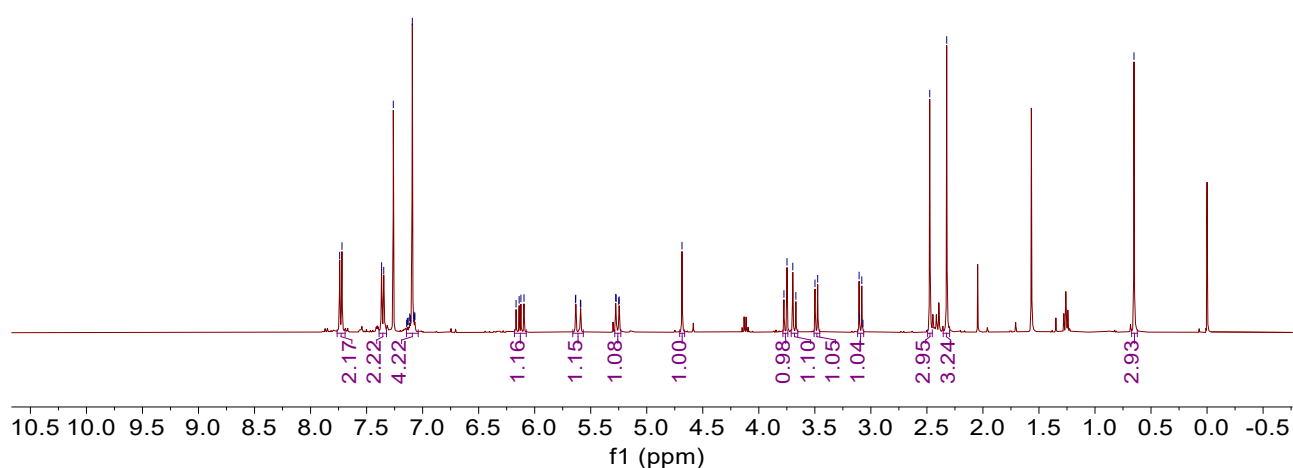

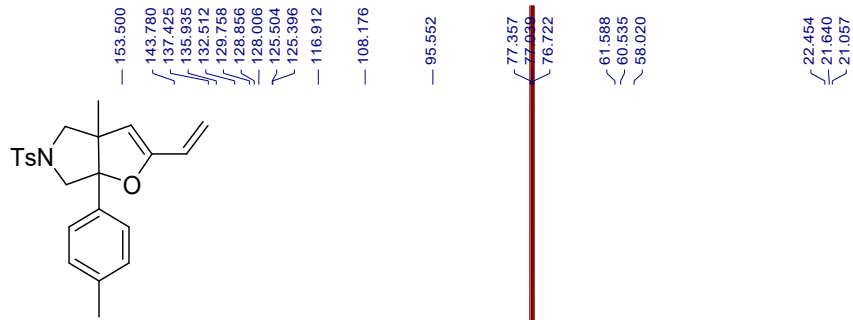

$^{13}\text{C}$  NMR ( $\text{CDCl}_3$ , 100 MHz, TMS)

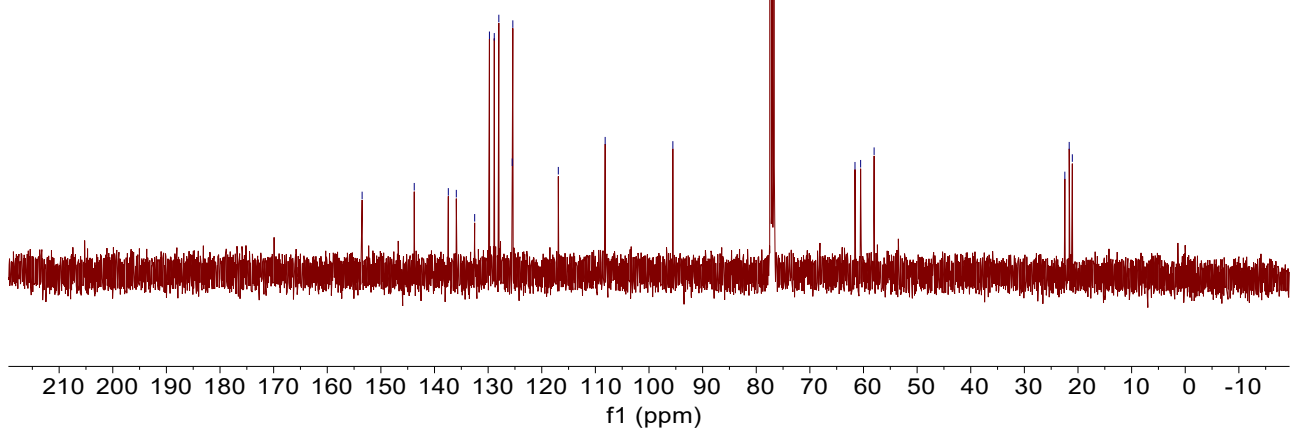

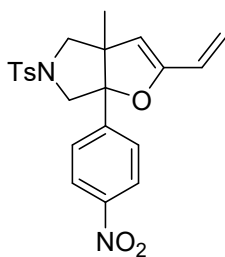

**3a-methyl-6a-(4-nitrophenyl)-5-tosyl-2-vinyl-3a,5,6,6a-tetrahydro-4H-furo[2,3-c]pyrrole (2t)**

A red oil, 62% yield, 26.4 mg.  $^1\text{H}$  NMR ( $\text{CDCl}_3$ , TMS, 400 MHz)  $\delta$  8.18 (d,  $J = 9.0$  Hz, 2H), 7.73 (d,  $J = 8.0$  Hz, 2H), 7.47 (d,  $J = 9.0$  Hz, 2H), 7.38 (d,  $J = 8.0$  Hz, 2H), 6.14 (dd,  $J = 17.4, 11.0$  Hz, 1H), 5.66 – 5.59 (m, 1H), 5.33 (d,  $J = 1.6$  Hz, 1H), 4.75 (s, 1H), 3.86 (d,  $J = 10.8$  Hz, 1H), 3.61 (d,  $J = 10.8$  Hz, 1H), 3.44 (d,  $J = 9.8$  Hz, 1H), 3.25 (d,  $J = 9.8$  Hz, 1H), 2.49 (s, 3H), 0.69 (s, 3H).  $^{13}\text{C}$  NMR ( $\text{CDCl}_3$ , TMS, 150 MHz)  $\delta$  153.1, 147.5, 146.6, 144.19, 144.16, 132.2, 129.9, 128.0, 126.5, 125.1, 123.5, 117.6, 108.1, 94.8, 61.6, 60.5, 58.7, 22.8, 21.7. IR (neat)  $\nu$  662, 853, 1163, 1231, 1597, 2848, 2942, 2964  $\text{cm}^{-1}$ . HRMS (ESI) calcd. for  $\text{C}_{22}\text{H}_{22}\text{N}_2\text{O}_5\text{SNa}$  ( $\text{M}+\text{Na}$ ) $^+$ : 449.1141, Found: 449.1147.

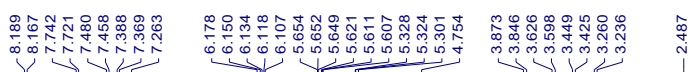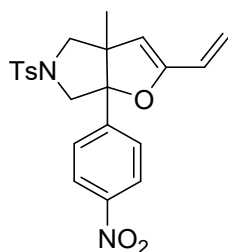

$^1\text{H}$  NMR ( $\text{CDCl}_3$ , 400 MHz, TMS)

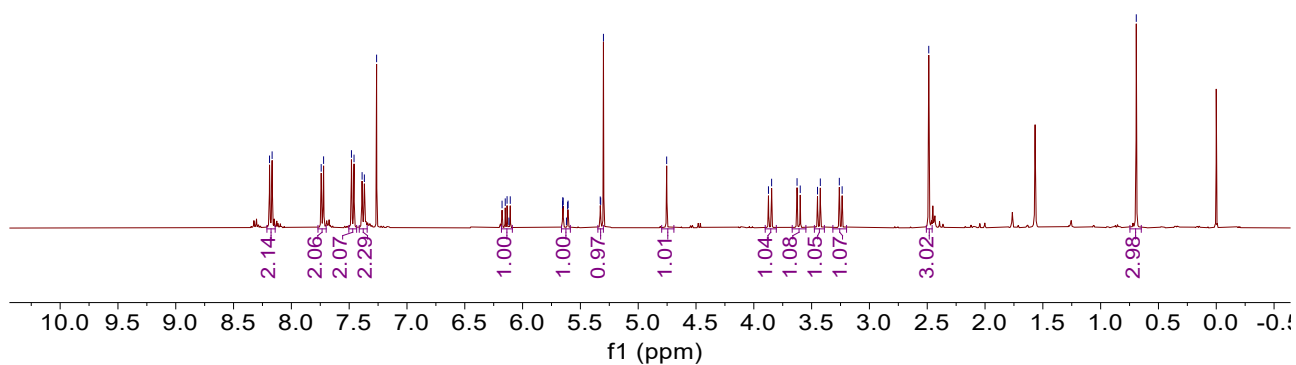

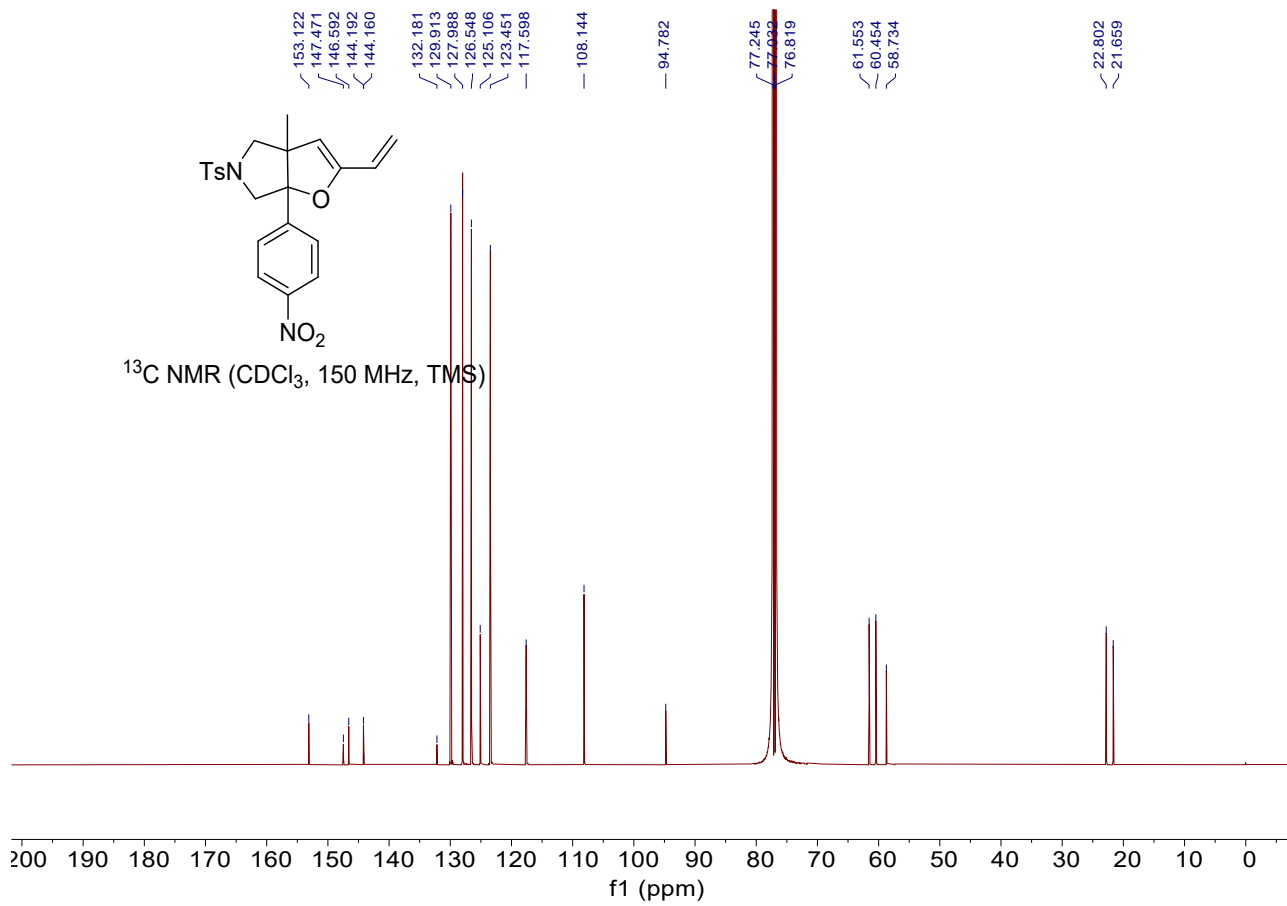

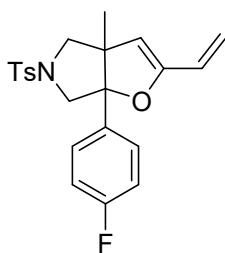

**6a-(4-fluorophenyl)-3a-methyl-5-tosyl-2-vinyl-3a,5,6,6a-tetrahydro-4H-furo[2,3-c]pyrrole (2u)**

A brown oil, 80% yield, 32.4 mg.  $^1\text{H}$  NMR ( $\text{CDCl}_3$ , TMS, 600 MHz)  $\delta$  7.73 (d,  $J = 8.4$ , 2H), 7.36 (d,  $J = 8.4$  Hz, 2H), 7.24 – 7.19 (m, 2H), 7.03 – 6.96 (m, 2H), 6.13 (dd,  $J = 17.4$ , 11.0 Hz, 1H), 5.60 (dd,  $J = 17.4$ , 1.6 Hz, 1H), 5.27 (dd,  $J = 11.0$ , 1.6 Hz, 1H), 4.70 (s, 1H), 3.78 (d,  $J = 11.0$  Hz, 1H), 3.64 (d,  $J = 11.0$  Hz, 1H), 3.45 (d,  $J = 9.6$  Hz, 1H), 3.14 (d,  $J = 9.6$  Hz, 1H), 2.47 (s, 3H), 0.66 (s, 3H).  $^{13}\text{C}$  NMR ( $\text{CDCl}_3$ , TMS, 150 MHz)  $\delta$  163.2 (d,  $J_{\text{C-F}} = 245.4$  Hz), 153.30, 153.28, 143.9, 134.9, 134.8, 132.41, 132.40, 129.8, 128.0, 127.3 (d,  $J_{\text{C-F}} = 8.4$  Hz), 125.4, 117.1, 115.1 (d,  $J_{\text{C-F}} = 21.5$  Hz), 108.2, 95.1, 61.5, 60.5, 58.1, 22.6, 21.6.  $^{19}\text{F}$  NMR (564 MHz,  $\text{CDCl}_3$ )  $\delta$  -114.9. IR (neat)  $\nu$  661, 815, 1157, 1216, 1346, 1447, 2869, 2926, 2959  $\text{cm}^{-1}$ . HRMS (ESI) calcd. for  $\text{C}_{22}\text{H}_{22}\text{NO}_3\text{FSNa}$  ( $\text{M}+\text{Na}$ ) $^+$ : 422.1197, Found: 422.1196.

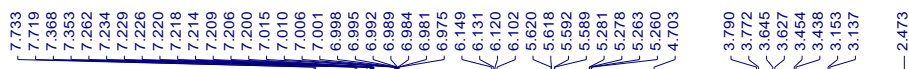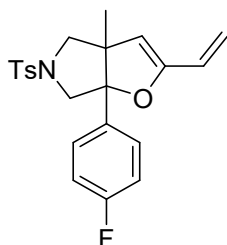

$^1\text{H}$  NMR ( $\text{CDCl}_3$ , 600 MHz, TMS)

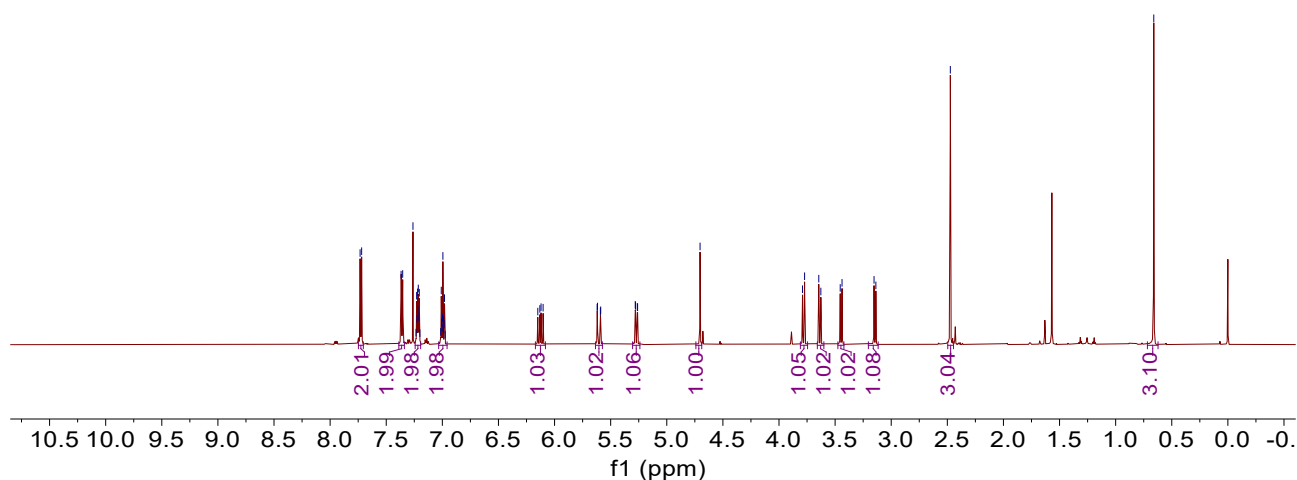

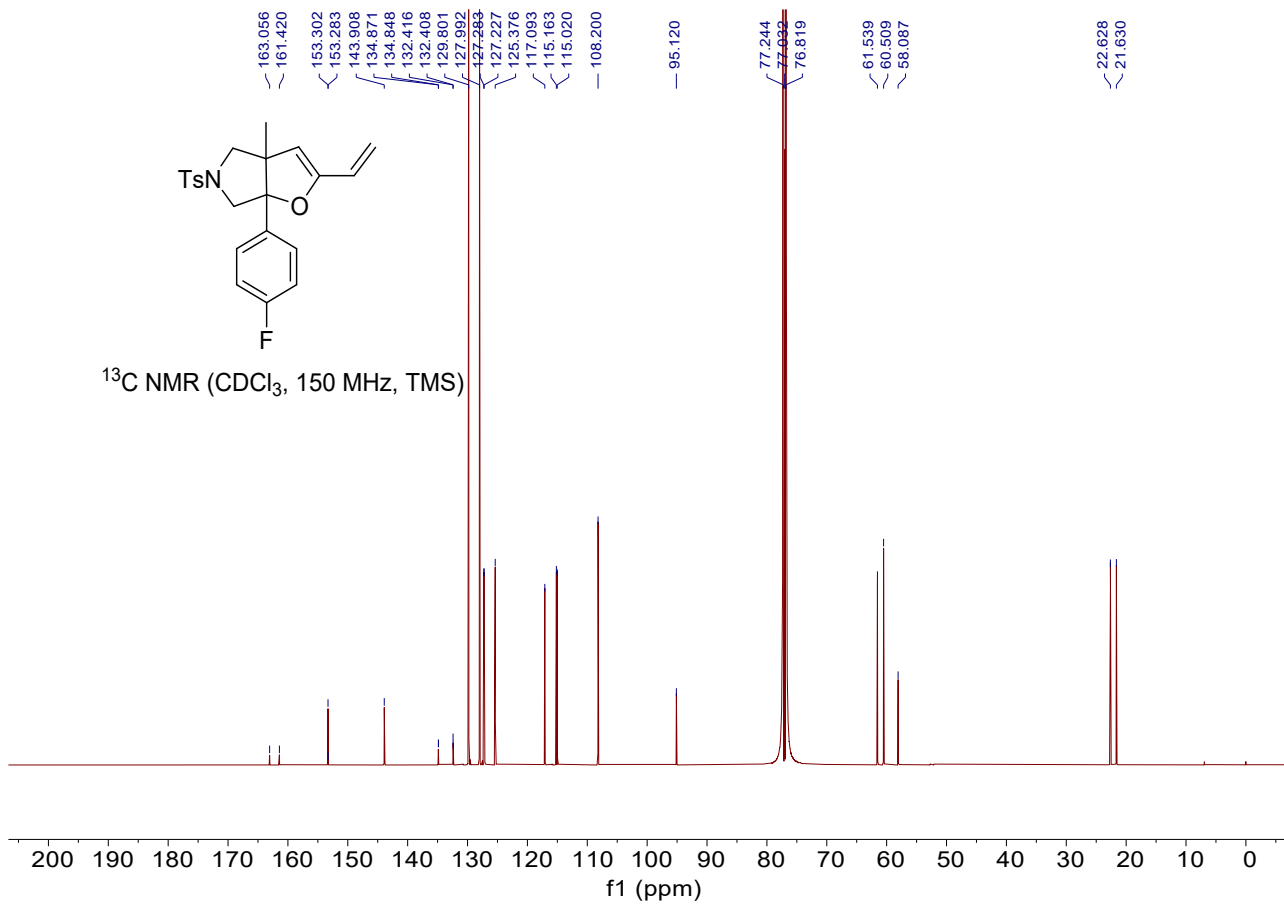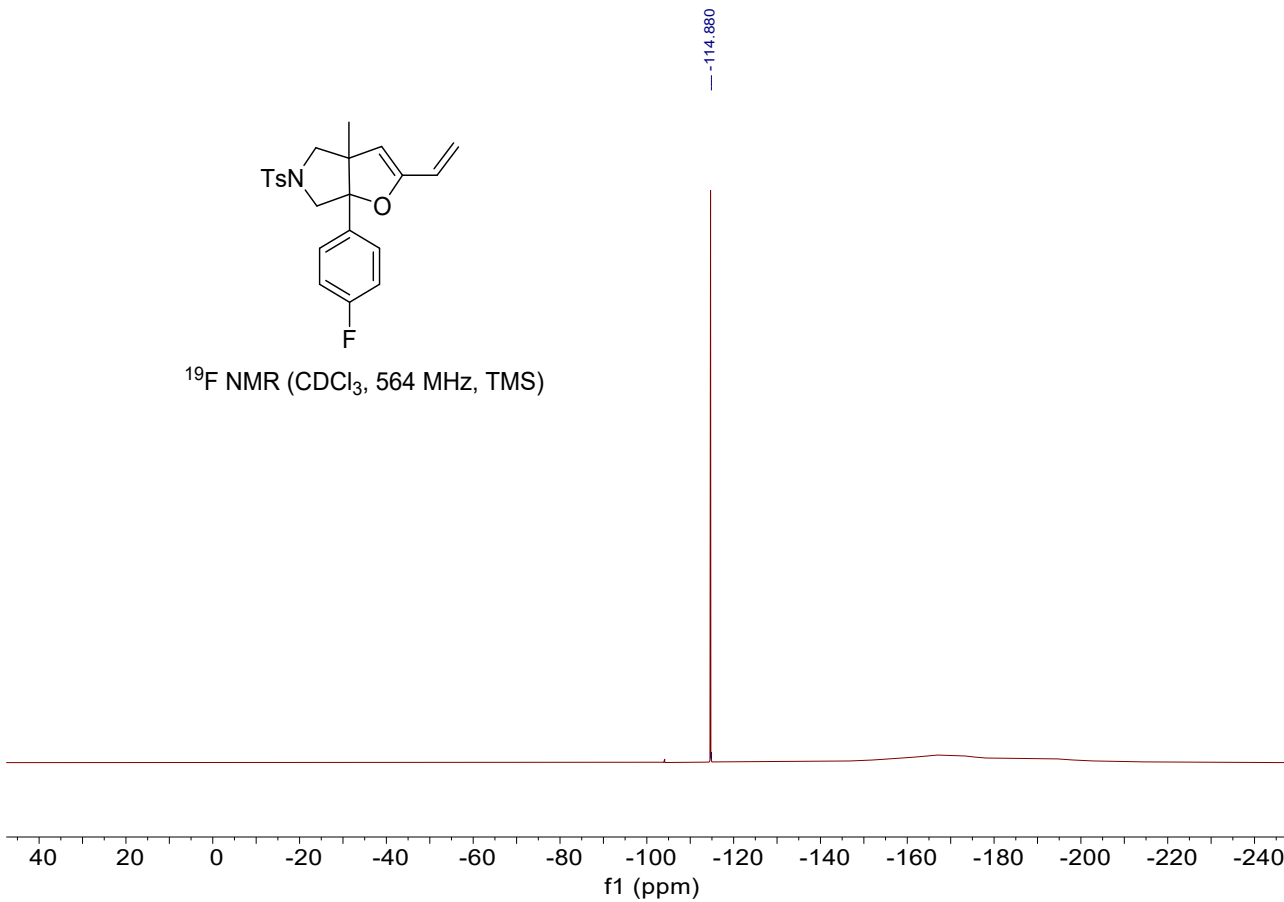



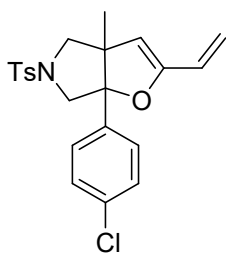

**6a-(4-chlorophenyl)-3a-methyl-5-tosyl-2-vinyl-3a,5,6,6a-tetrahydro-4H-furo[2,3-c]pyrrole (2v)**

A yellow oil, 82% yield, 35.4 mg.  $^1\text{H}$  NMR ( $\text{CDCl}_3$ , TMS, 600 MHz)  $\delta$  7.72 (d,  $J = 8.0$  Hz, 2H), 7.36 (d,  $J = 8.0$  Hz, 2H), 7.30 – 7.26 (m, 2H), 7.20 – 7.16 (m, 2H), 6.12 (dd,  $J = 17.4, 11.0$  Hz, 1H), 5.60 (dd,  $J = 17.4, 1.6$ , Hz, 1H), 5.29 – 5.24 (m, 1H), 4.71 (s, 1H), 3.77 (d,  $J = 11.0$  Hz, 1H), 3.63 (d,  $J = 11.0$  Hz, 1H), 3.45 (d,  $J = 9.8$  Hz, 1H), 3.15 (d,  $J = 9.8$  Hz, 1H), 2.47 (s, 3H), 0.67 (s, 3H).  $^{13}\text{C}$  NMR ( $\text{CDCl}_3$ , TMS, 150 MHz)  $\delta$  153.3, 143.94, 143.90, 137.67, 137.65, 133.7, 132.4, 129.8, 128.4, 128.0, 126.9, 125.3, 117.2, 108.2, 95.03, 95.01, 61.5, 60.5, 58.2, 22.6, 21.6. IR (neat)  $\nu$  660, 825, 997, 116, 1347, 2869, 2956  $\text{cm}^{-1}$ . HRMS (ESI) calcd. for  $\text{C}_{22}\text{H}_{22}\text{NO}_3\text{SNaCl}$  ( $\text{M}+\text{Na}$ ) $^+$ : 438.0901, Found: 438.0907.

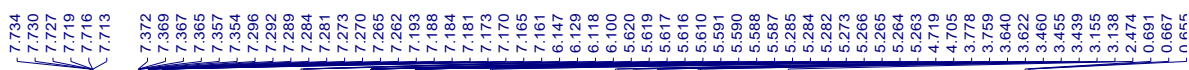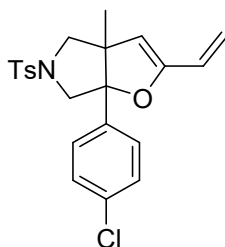

$^1\text{H}$  NMR ( $\text{CDCl}_3$ , 600 MHz, TMS)

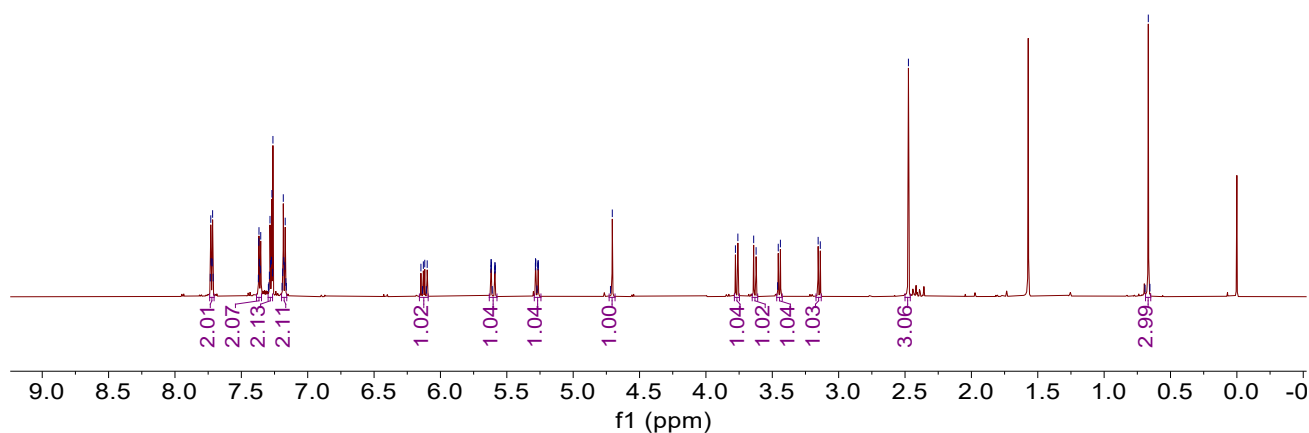

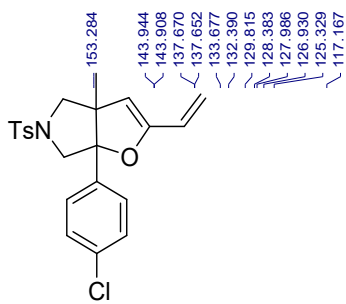

$^{13}\text{C}$  NMR ( $\text{CDCl}_3$ , 150 MHz, TMS)

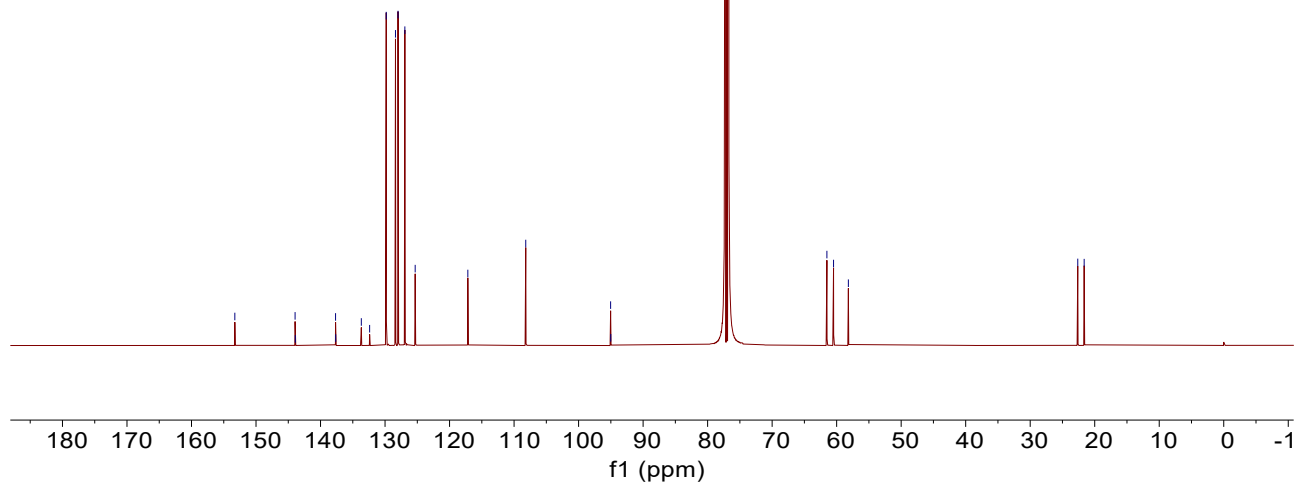

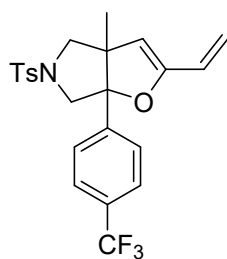

**3a-methyl-5-tosyl-6a-(4-(trifluoromethyl)phenyl)-2-vinyl-3a,5,6,6a-tetrahydro-4H-furo[2,3-c]pyrrole (2w)**

A colorless oil, 82% yield, 36.8 mg.  $^1\text{H}$  NMR ( $\text{CDCl}_3$ , TMS, 400 MHz)  $\delta$  7.73 (d,  $J = 8.0$  Hz, 2H), 7.57 (d,  $J = 8.0$  Hz, 2H), 7.41 – 7.34 (m, 4H), 6.14 (dd,  $J = 17.2, 11.0$  Hz, 1H), 5.62 (dd,  $J = 17.2, 1.6$  Hz, 1H), 5.29 (dd,  $J = 11.0, 1.6$  Hz, 1H), 4.73 (s, 1H), 3.82 (d,  $J = 10.8$  Hz, 1H), 3.65 (d,  $J = 11.0$  Hz, 1H), 3.47 (d,  $J = 9.6$  Hz, 1H), 3.19 (d,  $J = 9.6$  Hz, 1H), 2.48 (s, 3H), 0.67 (s, 3H).  $^{13}\text{C}$  NMR ( $\text{CDCl}_3$ , TMS, 100 MHz)  $\delta$  153.3, 144.0, 143.2, 130.3 (q,  $J_{\text{C-F}} = 32.4$  Hz), 129.9, 129.6, 128.0, 125.9, 125.8 (q,  $J_{\text{C-F}} = 3.8$  Hz), 124.0 (q,  $J_{\text{C-F}} = 270.3$  Hz), 117.3, 108.2, 95.0, 61.6, 60.5, 58.4, 22.7, 21.6.  $^{19}\text{F}$  NMR (564 MHz,  $\text{CDCl}_3$ )  $\delta$  -62.6. IR (neat)  $\nu$  666, 841, 1164, 1326, 1596, 2841, 2929, 2984  $\text{cm}^{-1}$ . HRMS (ESI) calcd. for  $\text{C}_{23}\text{H}_{22}\text{NO}_3\text{F}_3\text{SNa}$  ( $\text{M}+\text{Na}$ ) $^+$ : 472.1165, Found: 472.1166.

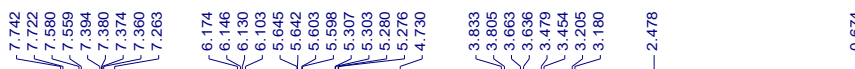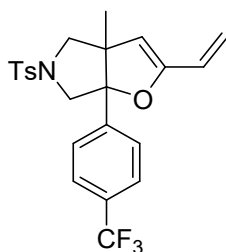

$^1\text{H}$  NMR ( $\text{CDCl}_3$ , 400 MHz, TMS)

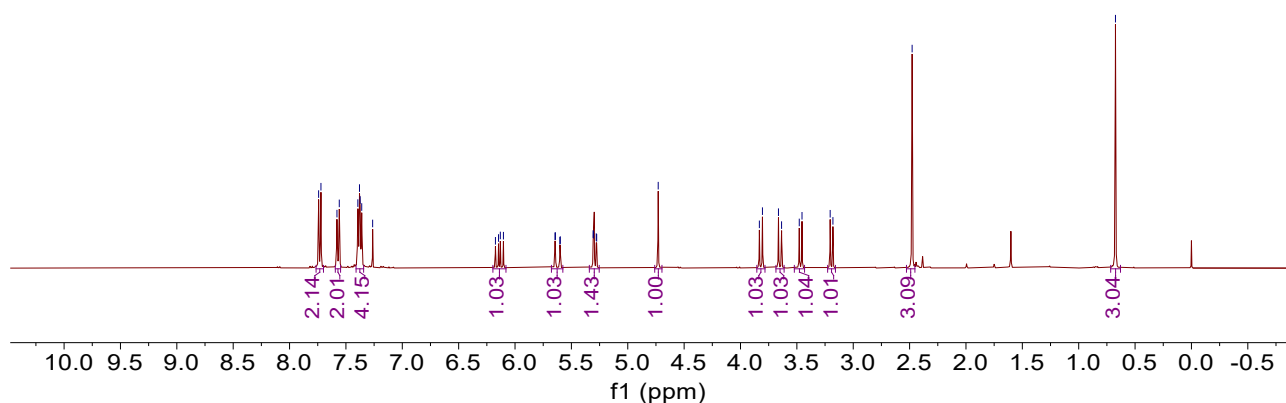

153.250  
 144.041  
 143.229  
 132.325  
 130.492  
 130.168  
 129.857  
 129.578  
 129.521  
 129.402  
 128.992  
 128.418  
 127.984  
 127.563  
 127.364  
 127.115  
 125.937  
 125.341  
 125.251  
 125.231  
 125.194  
 125.156  
 125.119  
 122.637  
 119.934  
 117.312  
 108.171  
 94.973  
 77.364  
 77.045  
 76.728  
 61.607  
 60.486  
 58.432  
 53.451  
 22.671  
 21.625  
 16.363  
 0.004

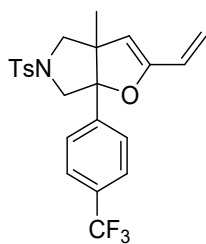

$^{13}\text{C}$  NMR ( $\text{CDCl}_3$ , 100 MHz, TMS)

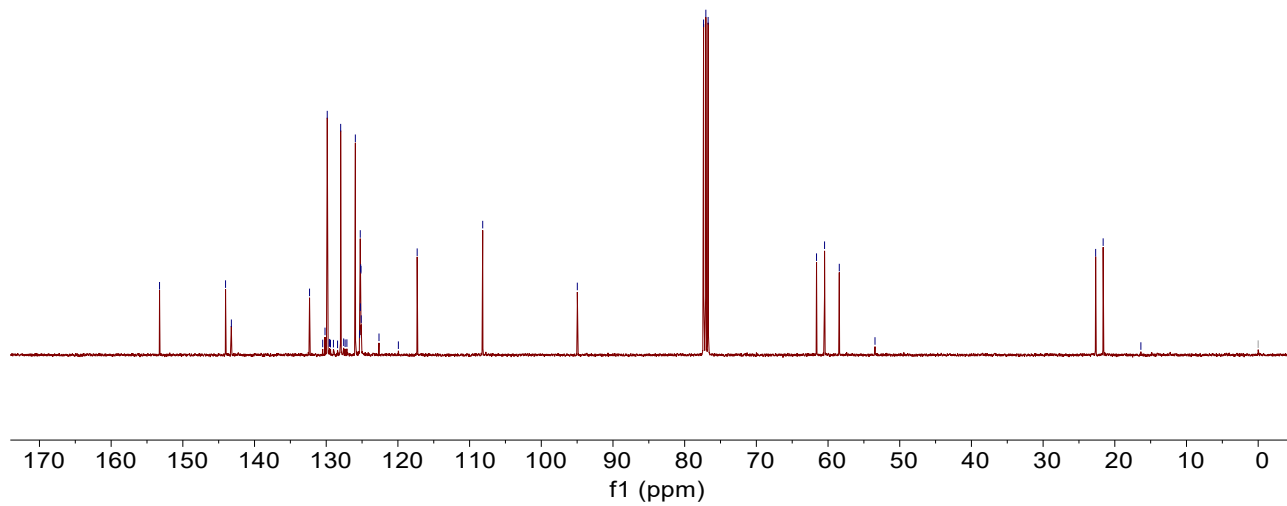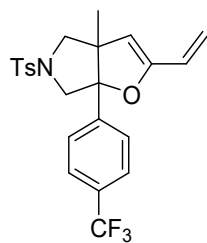

$^{19}\text{F}$  NMR ( $\text{CDCl}_3$ , 564 MHz, TMS)

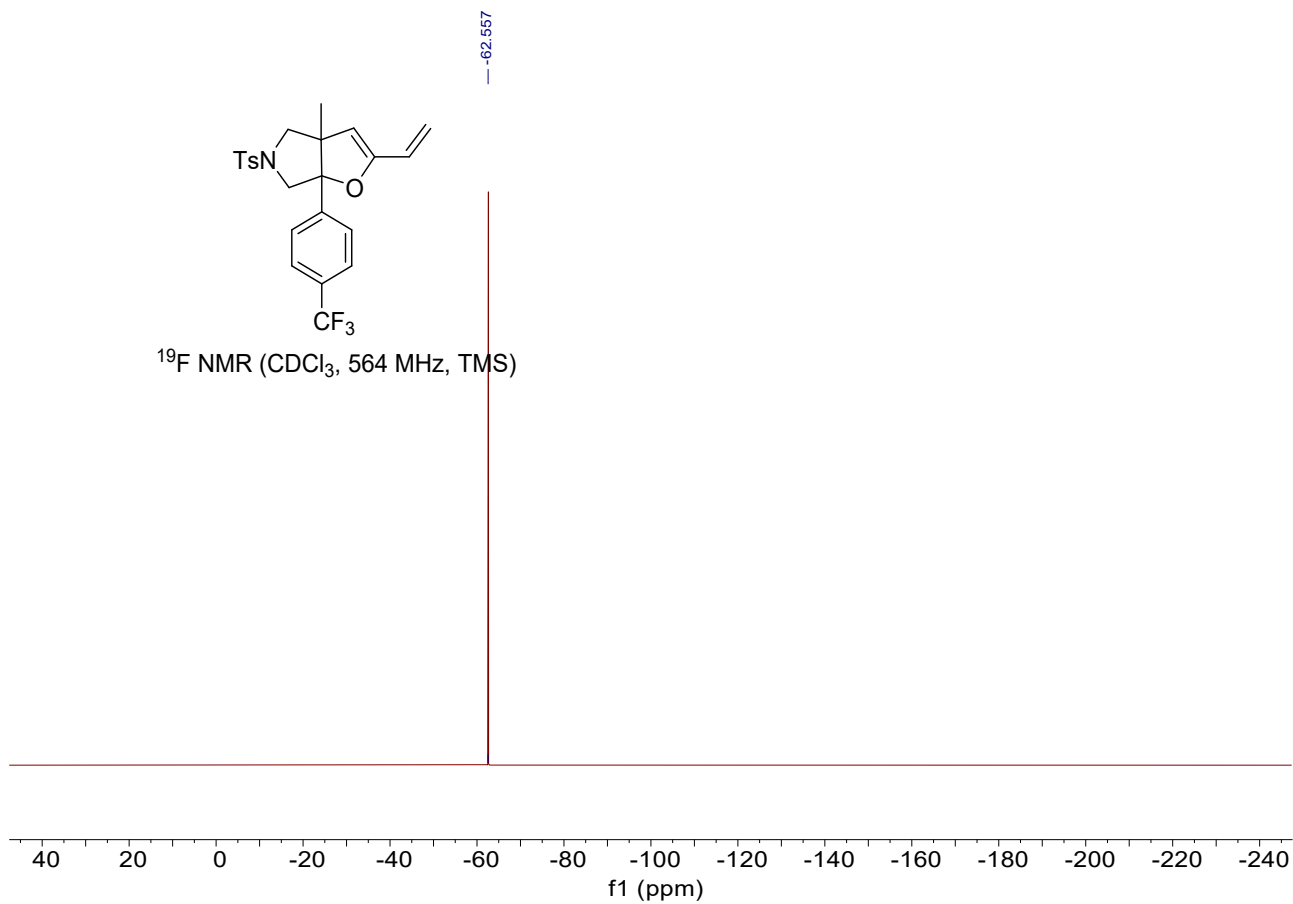

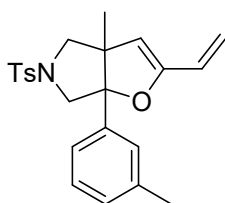

**3a-methyl-6a-(m-tolyl)-5-tosyl-2-vinyl-3a,5,6,6a-tetrahydro-4H-furo[2,3-c]pyrrole (2x)**

A yellow oil, 80% yield, 31.4 mg.  $^1\text{H}$  NMR ( $\text{CDCl}_3$ , TMS, 400 MHz)  $\delta$  7.74 (d,  $J = 8.0$  Hz, 2H), 7.36 (d,  $J = 8.0$  Hz, 2H), 7.17 (t,  $J = 7.6$  Hz, 1H), 7.07 (d,  $J = 7.6$  Hz, 1H), 6.99 (d,  $J = 8.4$  Hz, 1H), 6.96 (s, 1H), 6.14 (dd,  $J = 17.4, 11.0$  Hz, 1H), 5.62 (dd,  $J = 17.4, 1.6$  Hz, 1H), 5.27 (dd,  $J = 11.0, 1.6$  Hz, 1H), 4.70 (s, 1H), 3.79 (d,  $J = 11.2$  Hz, 1H), 3.70 (d,  $J = 11.2$  Hz, 1H), 3.52 (d,  $J = 9.6$  Hz, 1H), 3.12 (d,  $J = 9.6$  Hz, 1H), 2.47 (s, 3H), 2.29 (s, 3H), 0.65 (s, 3H).  $^{13}\text{C}$  NMR ( $\text{CDCl}_3$ , TMS, 100 MHz)  $\delta$  153.4, 143.8, 139.0, 137.8, 132.7, 129.8, 128.5, 128.1, 128.0, 126.0, 125.5, 122.6, 116.9, 108.3, 95.5, 61.8, 60.4, 58.1, 22.3, 21.62, 21.60. IR (neat)  $\nu$  668, 813, 1163, 1349, 1594, 2851, 2927, 2966  $\text{cm}^{-1}$ . HRMS (ESI) calcd. for  $\text{C}_{23}\text{H}_{25}\text{NO}_3\text{SNa}$  ( $\text{M}+\text{Na}$ ) $^+$ : 418.1447, Found: 418.1443.

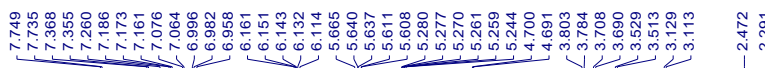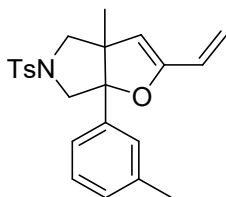

$^1\text{H}$  NMR ( $\text{CDCl}_3$ , 400 MHz, TMS)

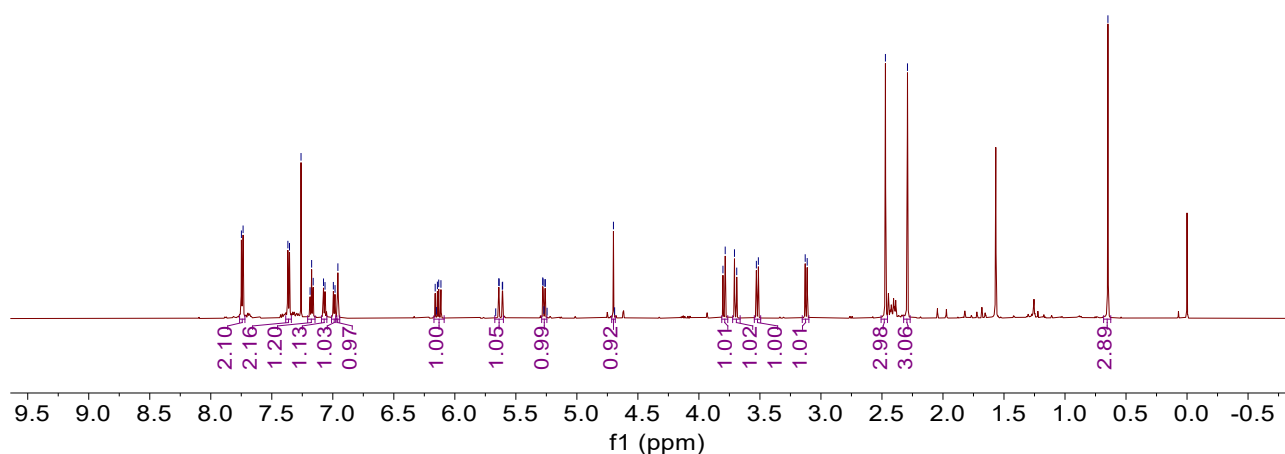

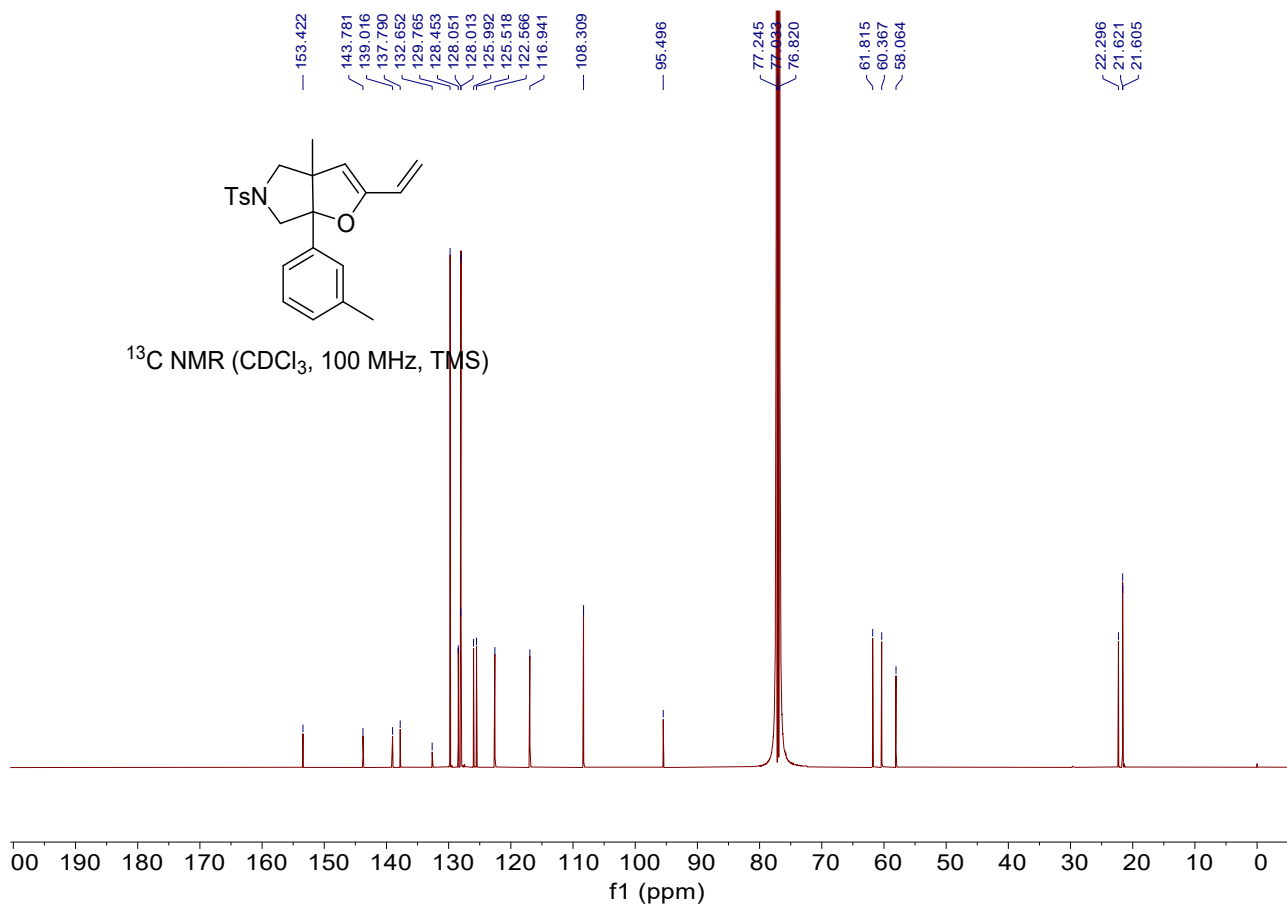

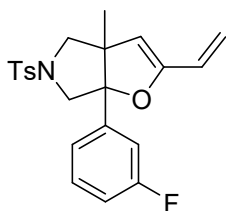

**6a-(3-fluorophenyl)-3a-methyl-5-tosyl-2-vinyl-3a,5,6,6a-tetrahydro-4H-furo[2,3-c]pyrrole (2y)**

A colorless oil, 70% yield, 28.4 mg.  $^1\text{H}$  NMR ( $\text{CDCl}_3$ , TMS, 400 MHz)  $\delta$  7.73 (d,  $J = 8.0$  Hz, 2H), 7.37 (d,  $J = 8.0$  Hz, 2H), 7.32 – 7.22 (m, 1H), 7.03 – 6.88 (m, 3H), 6.13 (dd,  $J = 17.2$ , 11.0 Hz, 1H), 5.62 (dd,  $J = 17.2$ , 1.6 Hz, 1H), 5.28 (dd,  $J = 11.0$ , 1.6 Hz, 1H), 4.72 (s, 1H), 3.75 (d,  $J = 11.0$  Hz, 1H), 3.68 (d,  $J = 11.0$  Hz, 1H), 3.49 (d,  $J = 9.6$  Hz, 1H), 3.12 (d,  $J = 9.6$  Hz, 1H), 2.47 (s, 3H), 0.68 (s, 3H).  $^{13}\text{C}$  NMR ( $\text{CDCl}_3$ , TMS, 100 MHz)  $\delta$  162.7 (d,  $J_{\text{C-F}} = 244.3$  Hz), 153.3, 144.0, 141.8 (d,  $J_{\text{C-F}} = 7.2$  Hz), 132.3, 129.8, 129.7 (d,  $J_{\text{C-F}} = 8.6$  Hz), 128.0, 125.3, 121.1 (d,  $J_{\text{C-F}} = 3.0$  Hz), 117.2, 114.6 (d,  $J_{\text{C-F}} = 21.0$  Hz), 112.8 (d,  $J_{\text{C-F}} = 23.1$  Hz), 108.2, 94.99, 94.97, 61.6, 60.4, 58.3, 22.4, 21.6.  $^{19}\text{F}$  NMR (564 MHz,  $\text{CDCl}_3$ )  $\delta$  -112.4. IR (neat)  $\nu$  678, 1157, 1216, 1351, 1596, 2921, 2966  $\text{cm}^{-1}$ . HRMS (ESI) calcd. for  $\text{C}_{22}\text{H}_{22}\text{NO}_3\text{FSNa}$  ( $\text{M}+\text{Na}$ ) $^+$ : 422.1197, Found: 422.1190.

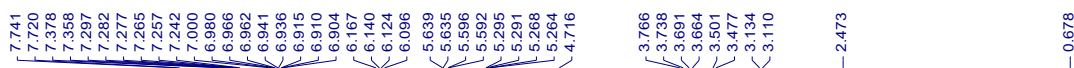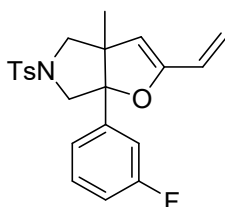

$^1\text{H}$  NMR ( $\text{CDCl}_3$ , 400 MHz, TMS)

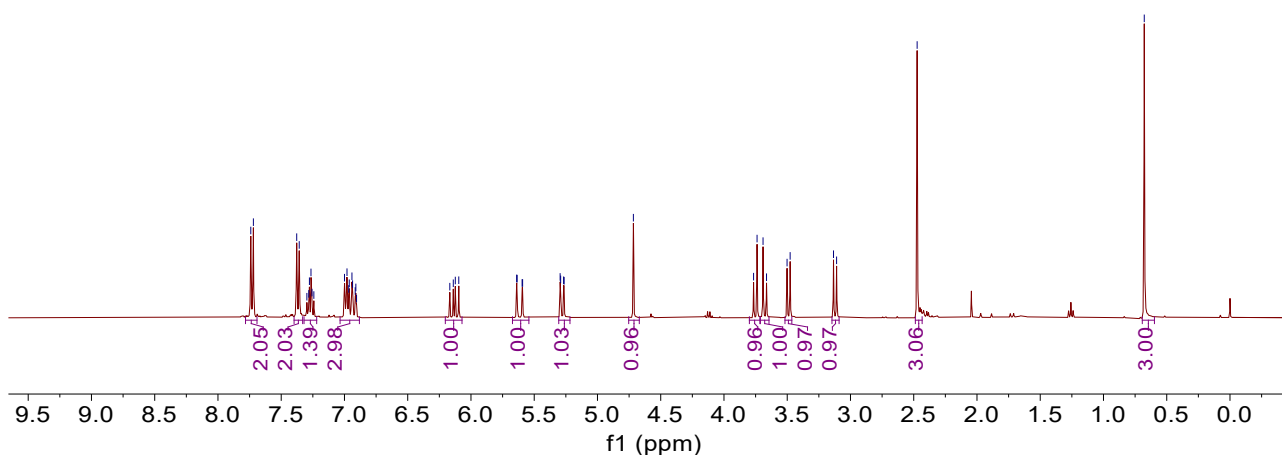

163.962  
 161.519  
 153.296  
 144.038  
 141.864  
 141.792  
 132.290  
 129.847  
 129.743  
 127.965  
 125.295  
 121.153  
 121.123  
 117.197  
 114.757  
 114.547  
 112.946  
 112.715  
 108.185  
 94.991  
 94.972  
 77.384  
 77.066  
 76.749  
 61.591  
 60.396  
 58.324  
 22.355  
 21.623

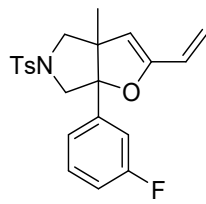

<sup>13</sup>C NMR (CDCl<sub>3</sub>, 100 MHz, TMS)

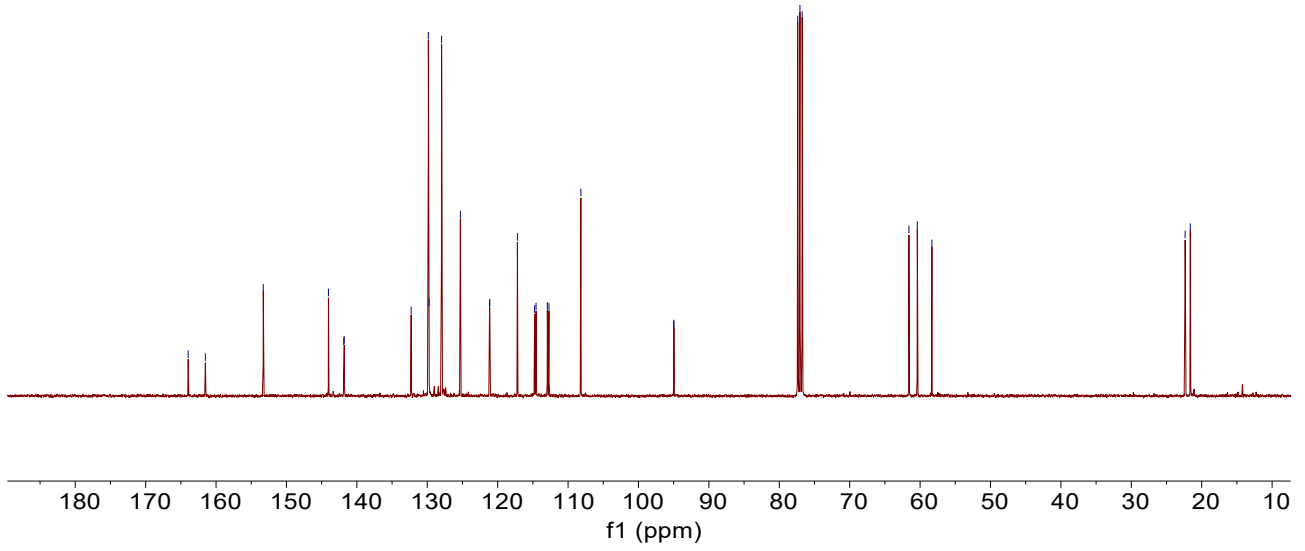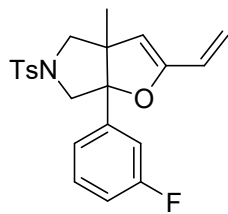

<sup>19</sup>F NMR (CDCl<sub>3</sub>, 564 MHz, TMS)

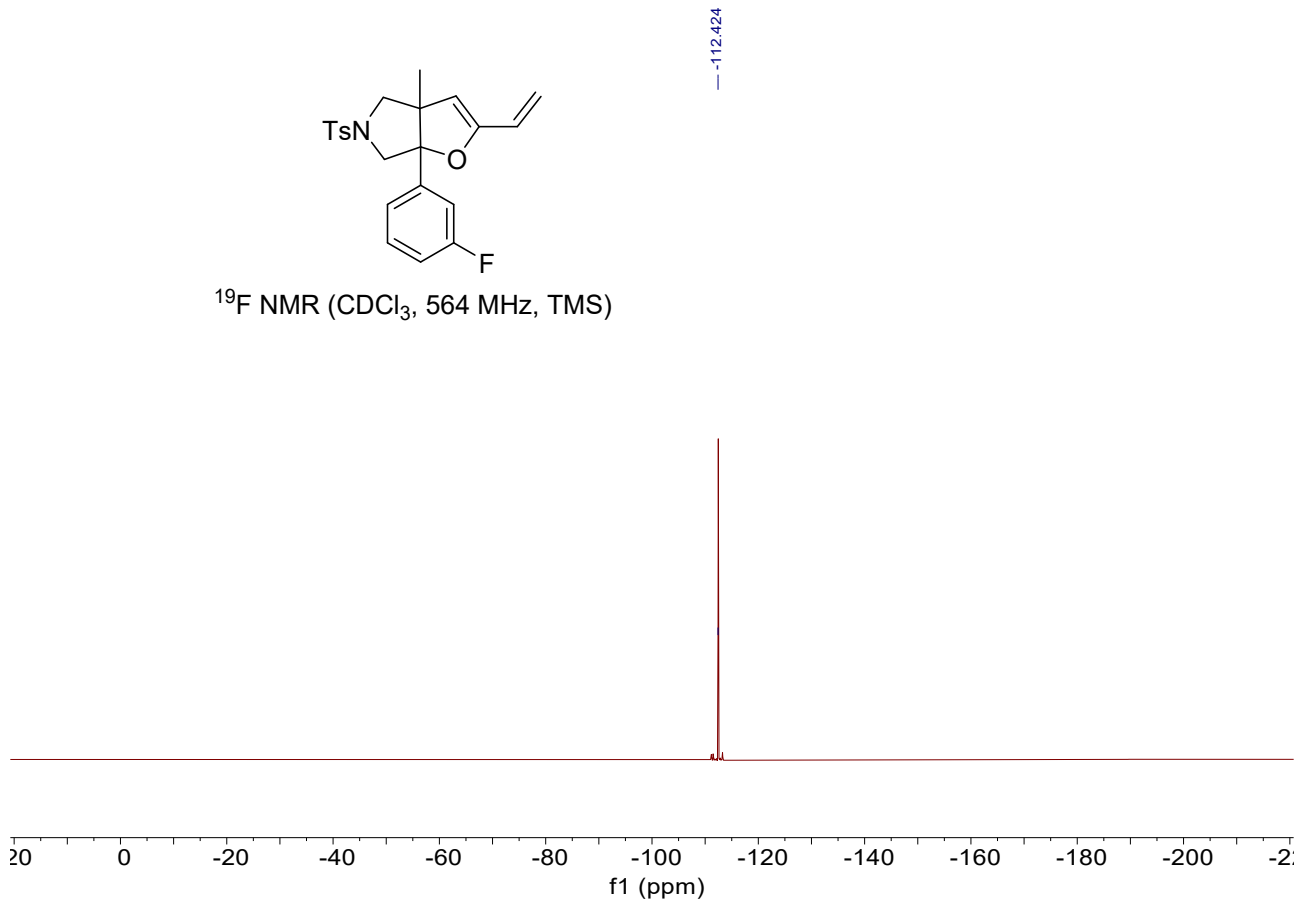



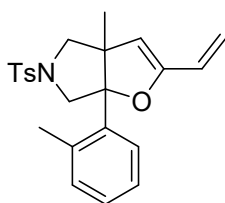

### 3a-methyl-6a-(o-tolyl)-5-tosyl-2-vinyl-3a,5,6,6a-tetrahydro-4H-furo[2,3-c]pyrrole (2z)

A yellow oil, 78% yield, 30.8 mg.  $^1\text{H}$  NMR ( $\text{CDCl}_3$ , TMS, 600 MHz)  $\delta$  7.73 (d,  $J = 8.0$  Hz, 2H), 7.36 (d,  $J = 8.0$  Hz, 2H), 7.23 (dd,  $J = 8.0, 1.6$  Hz, 1H), 7.18 – 7.09 (m, 3H), 6.10 (dd,  $J = 17.2, 11.0$  Hz, 1H), 5.54 (dd,  $J = 17.2, 0.8$  Hz, 1H), 5.22 (dd,  $J = 11.0, 1.6$  Hz, 1H), 4.80 (s, 1H), 4.17 (d,  $J = 11.0$  Hz, 1H), 3.46 (d,  $J = 11.0$  Hz, 1H), 3.35 (d,  $J = 9.6$  Hz, 1H), 3.30 (d,  $J = 9.6$  Hz, 1H), 2.47 (s, 3H), 2.30 (s, 3H), 0.74 (s, 3H).  $^{13}\text{C}$  NMR ( $\text{CDCl}_3$ , TMS, 150 MHz)  $\delta$  152.3, 143.8, 136.9, 136.6, 132.7, 129.8, 128.0, 127.7, 126.6, 125.9, 125.7, 117.0, 109.6, 97.1, 63.2, 61.1, 58.41, 58.40, 22.4, 22.1, 21.6. IR (neat)  $\nu$  667, 815, 1092, 1183, 1348, 1595, 2858, 2932, 2970  $\text{cm}^{-1}$ . HRMS (ESI) calcd. for  $\text{C}_{23}\text{H}_{25}\text{NO}_3\text{SNa}$  ( $\text{M}+\text{Na}$ ) $^+$ : 418.1447, Found: 418.1446.

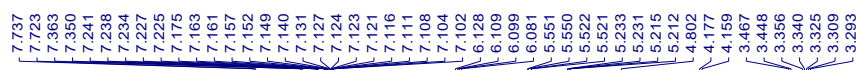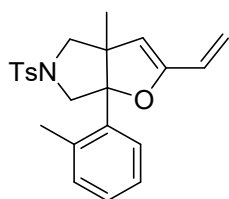

$^1\text{H}$  NMR ( $\text{CDCl}_3$ , 600 MHz, TMS)

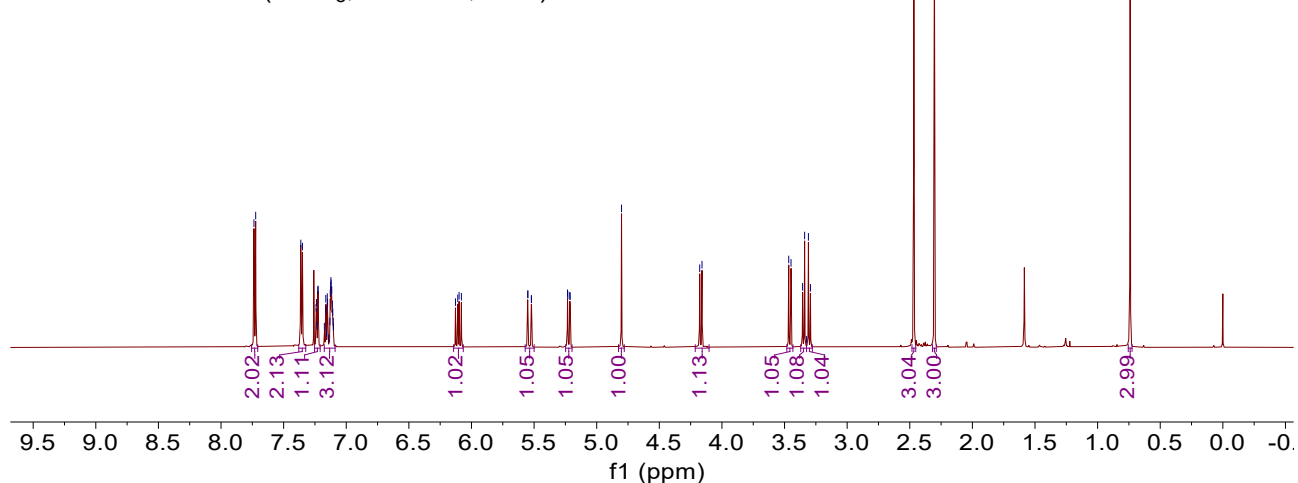

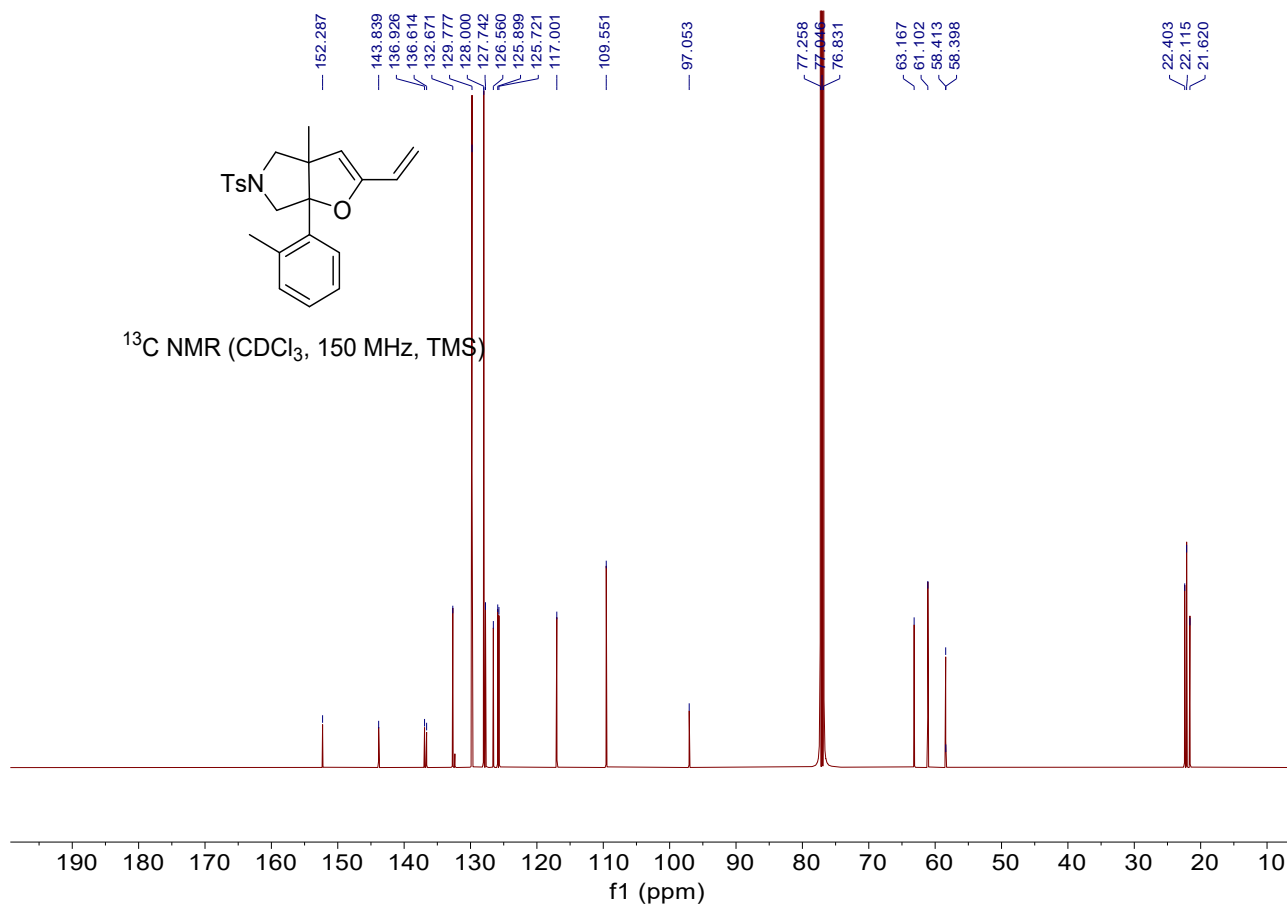

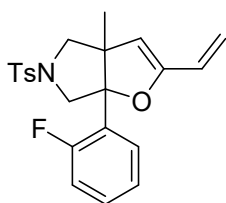

### 3a-methyl-6a-(o-tolyl)-5-tosyl-2-vinyl-3a,5,6,6a-tetrahydro-4H-furo[2,3-c]pyrrole (2aa)

A red oil, 78% yield, 31.4 mg.  $^1\text{H}$  NMR ( $\text{CDCl}_3$ , TMS, 600 MHz)  $\delta$  7.70 (d,  $J = 8.0$  Hz, 2H), 7.58 (d,  $J = 8.0$  Hz, 1H), 7.33 (d,  $J = 8.0$  Hz, 2H), 7.30 – 7.22 (m, 1H), 7.14 (td,  $J = 7.6, 1.2$  Hz, 1H), 6.94 (dd,  $J = 12.0, 8.0$ , Hz, 1H), 6.15 (dd,  $J = 17.2, 11.0$  Hz, 1H), 5.65 (dd,  $J = 17.2, 1.6$  Hz, 1H), 5.29 (dd,  $J = 11.0, 1.6$  Hz, 1H), 4.68 (s, 1H), 3.88 (dd,  $J = 11.2, 5.2$  Hz, 1H), 3.70 – 3.64 (m, 2H), 3.09 (dd,  $J = 9.6, 3.2$  Hz, 1H), 2.46 (s, 3H), 0.82 (s, 3H).  $^{13}\text{C}$  NMR ( $\text{CDCl}_3$ , TMS, 150 MHz)  $\delta$  158.9 (d,  $J_{\text{C-F}} = 243.0$  Hz), 153.1, 143.5, 132.7, 129.8 (d,  $J_{\text{C-F}} = 8.9$  Hz), 129.6, 128.1 (d,  $J_{\text{C-F}} = 4.2$  Hz), 127.9, 126.2 (d,  $J_{\text{C-F}} = 10.9$  Hz), 125.3, 124.4 (d,  $J_{\text{C-F}} = 3.5$  Hz), 116.8, 115.8 (d,  $J_{\text{C-F}} = 22.8$  Hz), 108.2, 94.93, 94.89, 61.2 (d,  $J_{\text{C-F}} = 5.6$  Hz), 59.7 (d,  $J_{\text{C-F}} = 3.3$  Hz), 58.8, 21.6, 20.7 (d,  $J_{\text{C-F}} = 2.9$  Hz).  $^{19}\text{F}$  NMR (564 MHz,  $\text{CDCl}_3$ )  $\delta$  -108.5. IR (neat)  $\nu$  678, 1218, 1353, 1596, 2921, 2966, 3023  $\text{cm}^{-1}$ . HRMS (ESI) calcd. for  $\text{C}_{22}\text{H}_{22}\text{NO}_3\text{FSNa}$  ( $\text{M}+\text{Na}$ ) $^+$ : 422.1197, Found: 422.1205.

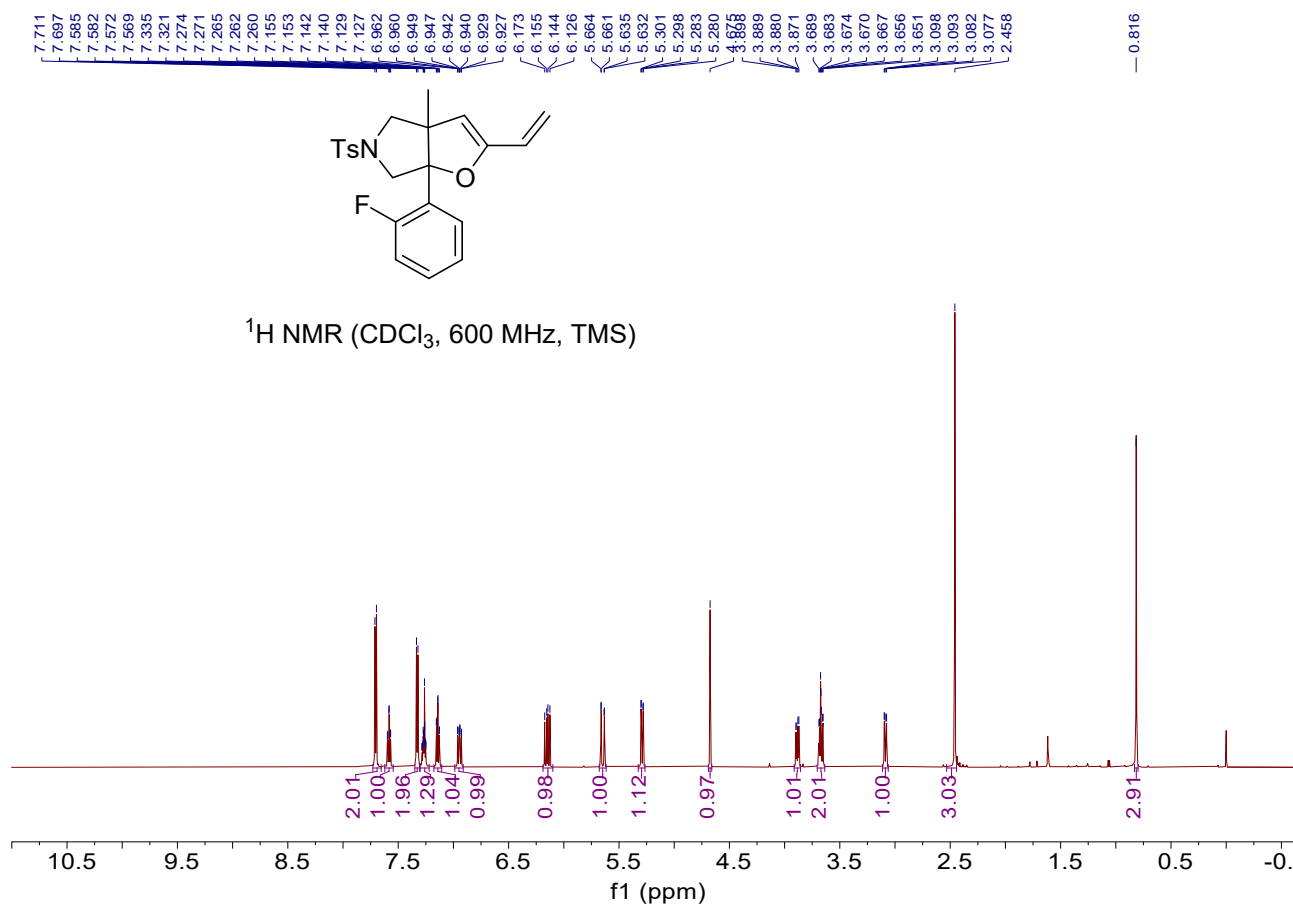

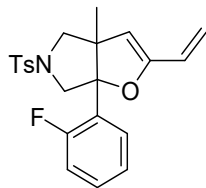

<sup>13</sup>C NMR (CDCl<sub>3</sub>, 150 MHz, TMS)

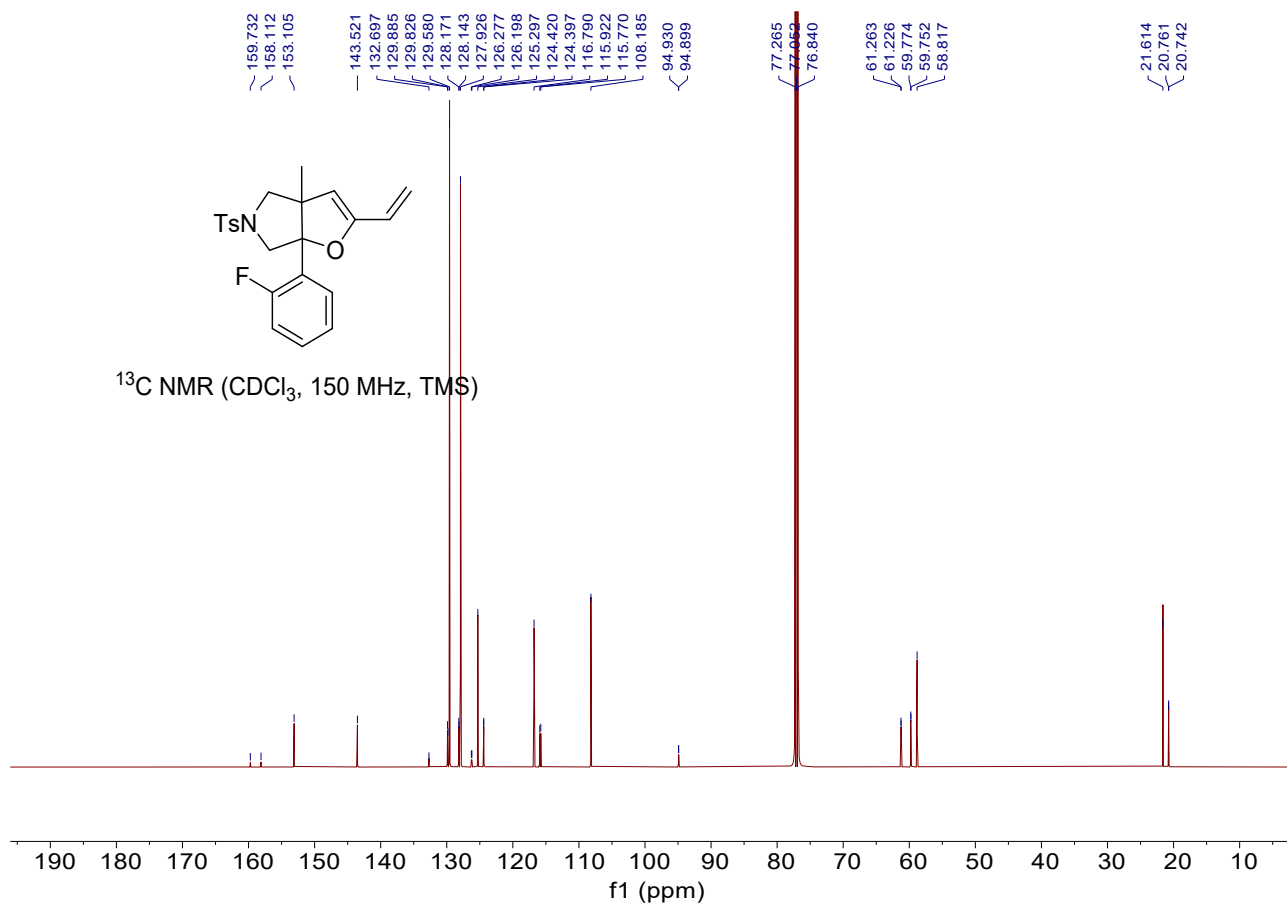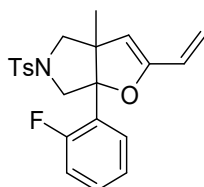

<sup>19</sup>F NMR (CDCl<sub>3</sub>, 564 MHz, TMS)

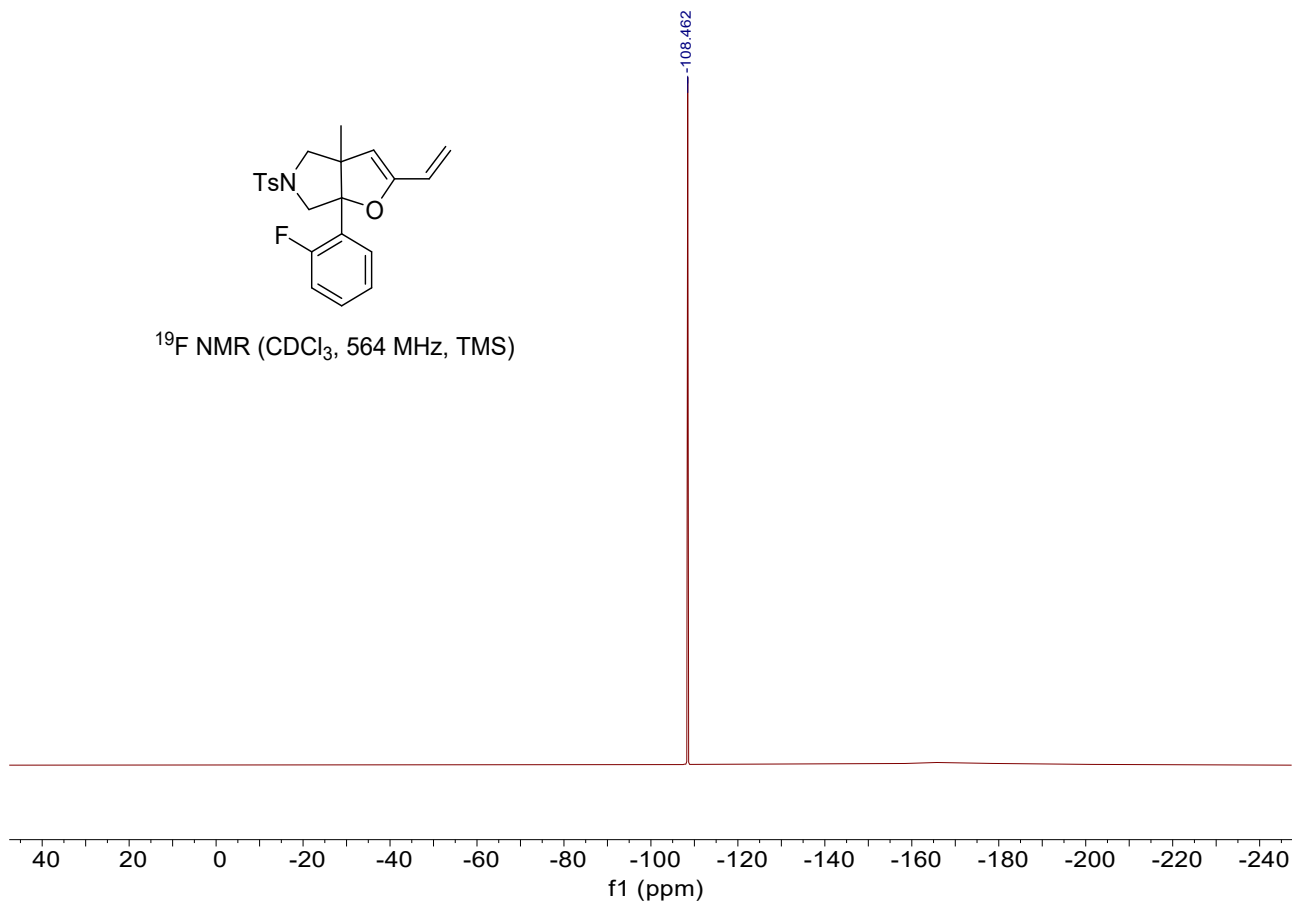

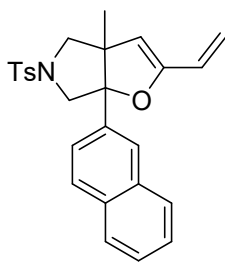

**3a-methyl-6a-(naphthalen-2-yl)-5-tosyl-2-vinyl-3a,5,6,6a-tetrahydro-4H-furo[2,3-c]pyrrole**

**(2ab)**

A colorless oil, 80% yield, 34.5 mg.  $^1\text{H}$  NMR ( $\text{CDCl}_3$ , TMS, 600 MHz)  $\delta$  7.84 – 7.74 (m, 5H), 7.70 (s, 1H), 7.51 – 7.45 (m, 2H), 7.39 (d,  $J = 8.0$  Hz, 2H), 7.28 (dd,  $J = 8.4, 2.0$  Hz, 1H), 6.18 (dd,  $J = 17.2, 11.0$  Hz, 1H), 5.69 (dd,  $J = 17.2, 1.6$  Hz, 1H), 5.31 (dd,  $J = 11.2, 1.6$  Hz, 1H), 4.75 (s, 1H), 3.95 (d,  $J = 11.2$  Hz, 1H), 3.77 (d,  $J = 11.2$  Hz, 1H), 3.56 (d,  $J = 10.0$  Hz, 1H), 3.22 (d,  $J = 10.0$  Hz, 1H), 2.50 (s, 3H), 0.67 (s, 3H).  $^{13}\text{C}$  NMR ( $\text{CDCl}_3$ , TMS, 150 MHz)  $\delta$  153.5, 143.9, 136.5, 132.8, 132.7, 129.8, 128.3, 128.1, 127.9, 127.5, 126.31, 126.27, 125.5, 124.4, 123.6, 117.1, 108.4, 95.6, 61.8, 60.5, 58.3, 22.4, 21.7. IR (neat)  $\nu$  678, 1157, 1228, 1351, 1596, 2921, 2966, 3031  $\text{cm}^{-1}$ . HRMS (ESI) calcd. for  $\text{C}_{26}\text{H}_{25}\text{NO}_3\text{SNa}$  ( $\text{M}+\text{Na}$ ) $^+$ : 454.1447, Found: 454.1447.

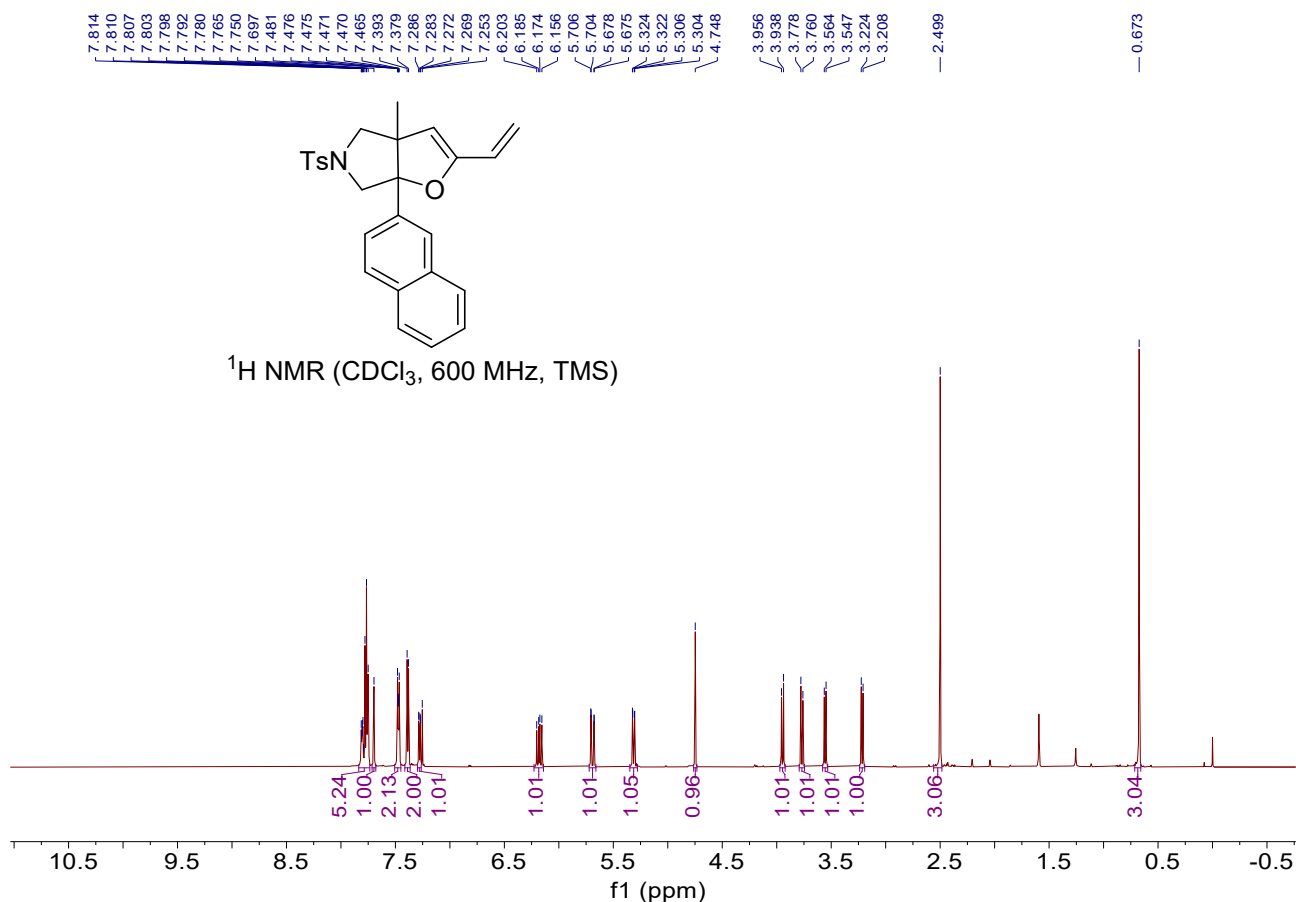

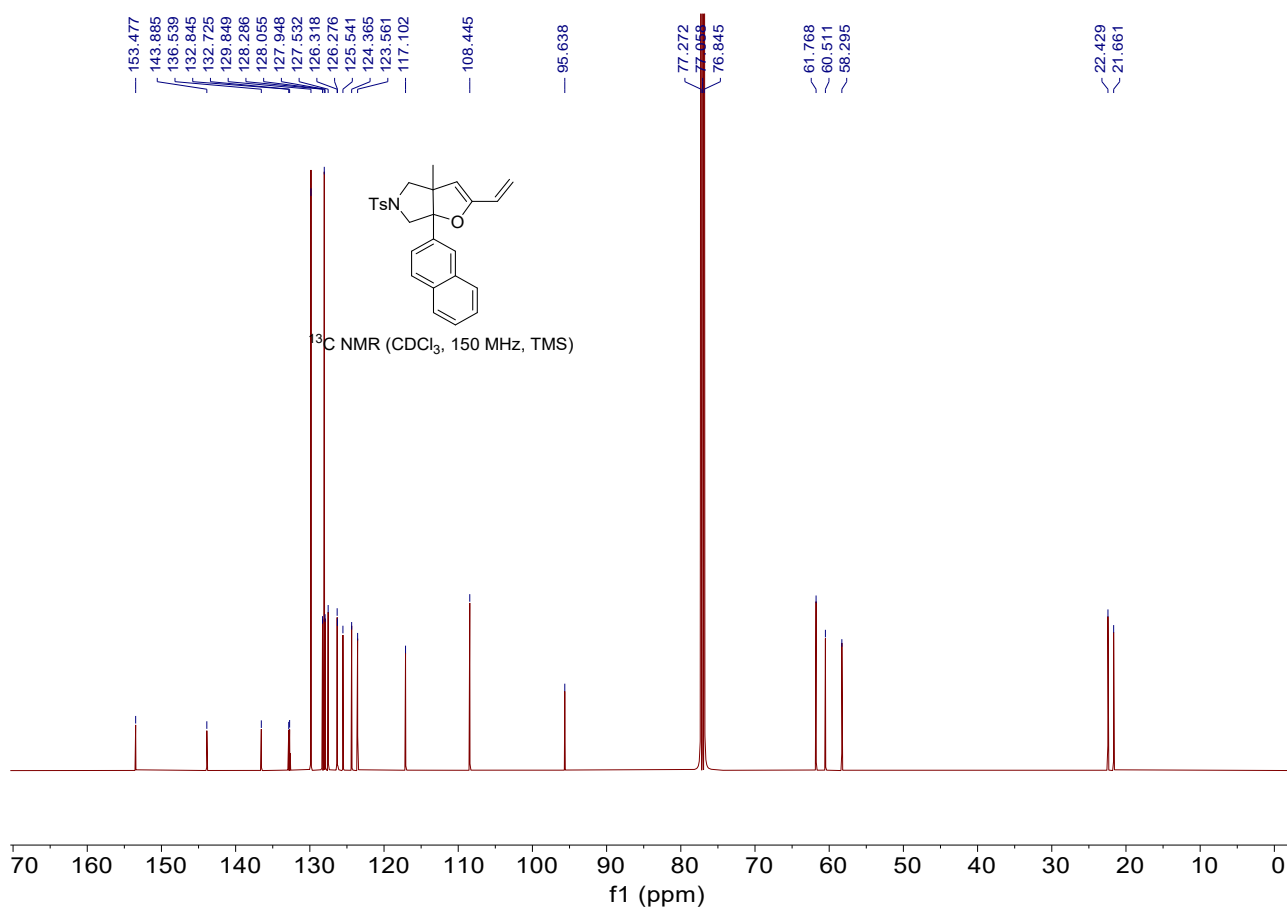

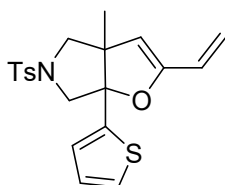

**3a-methyl-6a-(thiophen-2-yl)-5-tosyl-2-vinyl-3a,5,6,6a-tetrahydro-4H-furo[2,3-c]pyrrole (2ac)**

A brown oil, 36% yield, 13.4 mg.  $^1\text{H}$  NMR ( $\text{CDCl}_3$ , TMS, 600 MHz)  $\delta$  7.72 (d,  $J = 8.0$  Hz, 2H), 7.35 (d,  $J = 8.0$  Hz, 2H), 7.23 (dd,  $J = 5.2, 1.2$  Hz, 1H), 6.97 (dd,  $J = 5.2, 3.6$  Hz, 1H), 6.74 (dd,  $J = 3.6, 1.2$  Hz, 1H), 6.13 (dd,  $J = 17.2, 11.0$  Hz, 1H), 5.62 – 5.56 (m, 1H), 5.27 (dd,  $J = 11.2, 1.6$  Hz, 1H), 4.71 (s, 1H), 3.92 (d,  $J = 11.2$  Hz, 1H), 3.56 (d,  $J = 9.6$  Hz, 1H), 3.53 (d,  $J = 11.2$  Hz, 1H), 2.92 (d,  $J = 9.6$  Hz, 1H), 2.46 (s, 3H), 0.79 (s, 3H).  $^{13}\text{C}$  NMR ( $\text{CDCl}_3$ , TMS, 100 MHz)  $\delta$  153.9, 143.9, 142.6, 132.5, 129.8, 128.0, 127.1, 125.2, 125.1, 124.0, 117.3, 107.3, 95.0, 61.4, 60.4, 58.4, 21.64, 21.62. IR (neat)  $\nu$  664, 813, 1024, 1164, 1347, 1595, 2849, 2922  $\text{cm}^{-1}$ . HRMS (ESI) calcd. for  $\text{C}_{20}\text{H}_{21}\text{NO}_3\text{S}_2\text{Na}$  ( $\text{M}+\text{Na}$ ) $^+$ : 410.0855, Found: 410.0853.

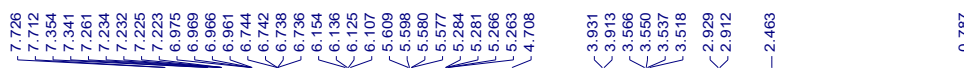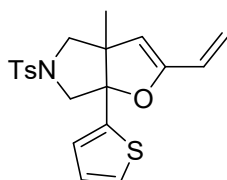

$^1\text{H}$  NMR ( $\text{CDCl}_3$ , 600 MHz, TMS)

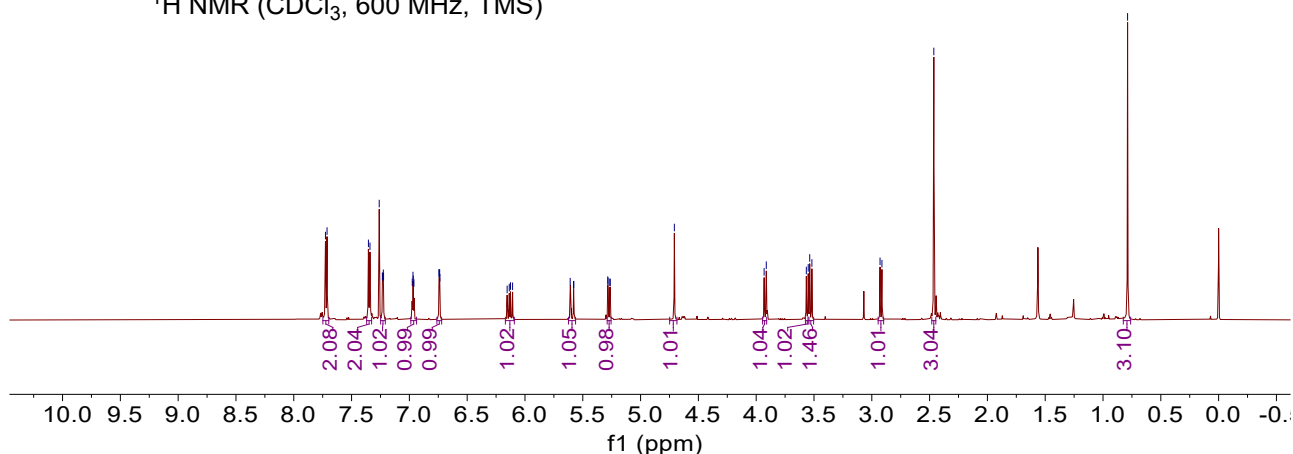

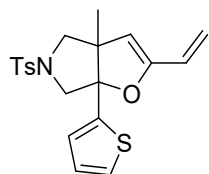

$^{13}\text{C}$  NMR ( $\text{CDCl}_3$ , 100 MHz, TMS)

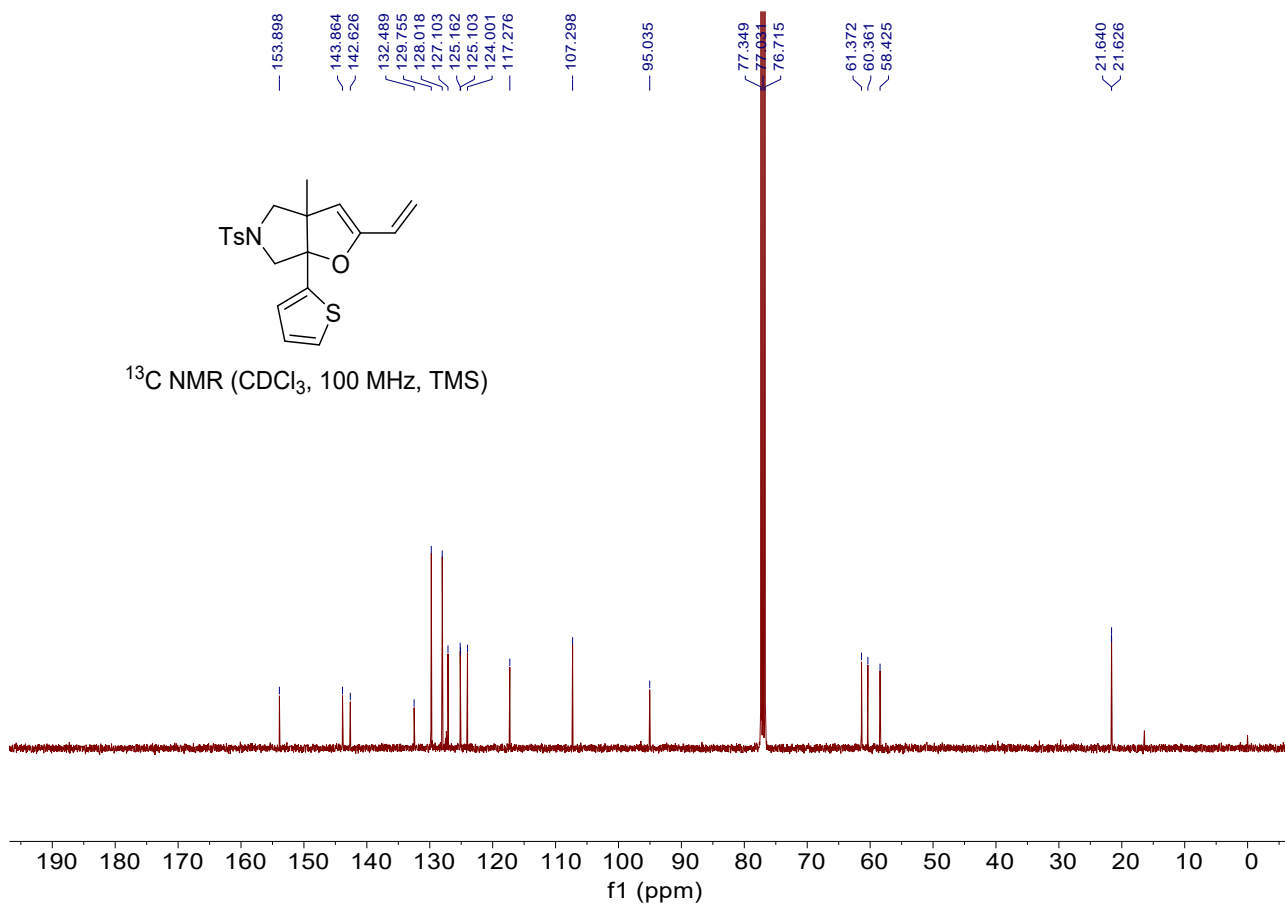



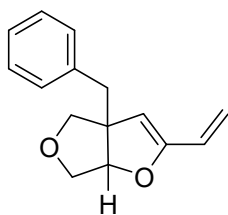

### 3a-benzyl-2-vinyl-3a,4,6,6a-tetrahydrofuro[3,4-b]furan (2ad)

A colorless oil, 86% yield, 19.4 mg.  $^1\text{H}$  NMR ( $\text{CDCl}_3$ , TMS, 400 MHz)  $\delta$  7.32 – 7.28 (m, 2H), 7.25 – 7.21 (m, 1H), 7.20 – 7.13 (m, 2H), 6.15 (dd,  $J = 17.4, 11.0$  Hz, 1H), 5.49 (dd,  $J = 17.4, 1.6$  Hz, 1H), 5.20 (dd,  $J = 11.0, 1.6$  Hz, 1H), 4.82 (dd,  $J = 4.5, 1.2$  Hz, 1H), 4.80 (s, 1H), 4.11 (d,  $J = 11.3$  Hz, 1H), 3.78 – 3.66 (m, 3H), 3.00 (d,  $J = 13.2$  Hz, 1H), 2.94 (d,  $J = 13.2$  Hz, 1H).  $^{13}\text{C}$  NMR ( $\text{CDCl}_3$ , TMS, 100 MHz)  $\delta$  155.6, 137.7, 129.7, 128.4, 126.6, 125.7, 116.4, 105.6, 89.7, 78.5, 75.8, 61.3, 42.9. IR (neat)  $\nu$  668, 1227, 1365, 1566, 2927, 2968  $\text{cm}^{-1}$ . HRMS (EI) calcd. for  $\text{C}_{15}\text{H}_{16}\text{O}_2$ : 228.1147, Found: 228.1145.

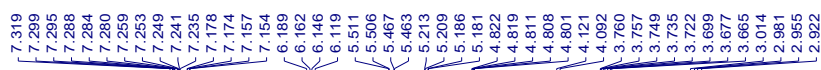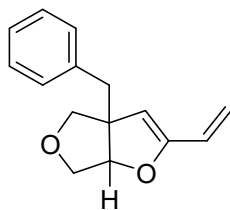

$^1\text{H}$  NMR ( $\text{CDCl}_3$ , 400 MHz, TMS)

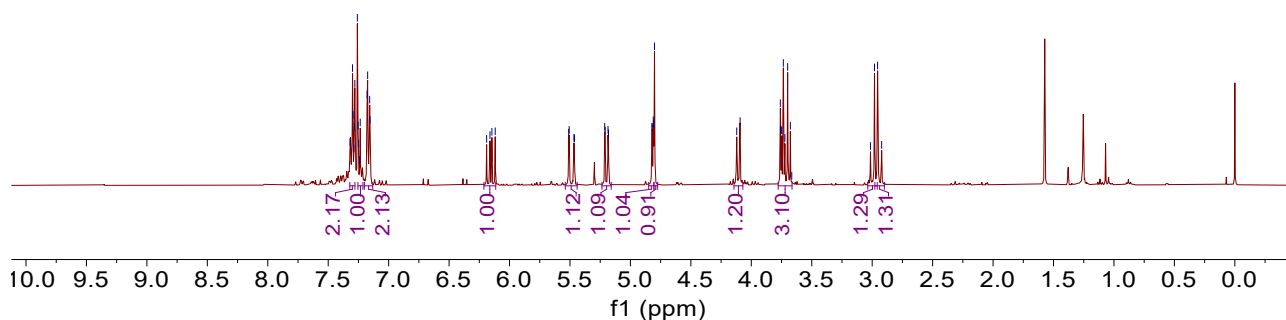

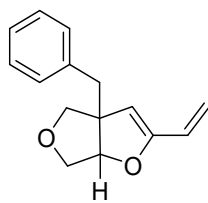

$^{13}\text{C}$  NMR ( $\text{CDCl}_3$ , 100 MHz, TMS)

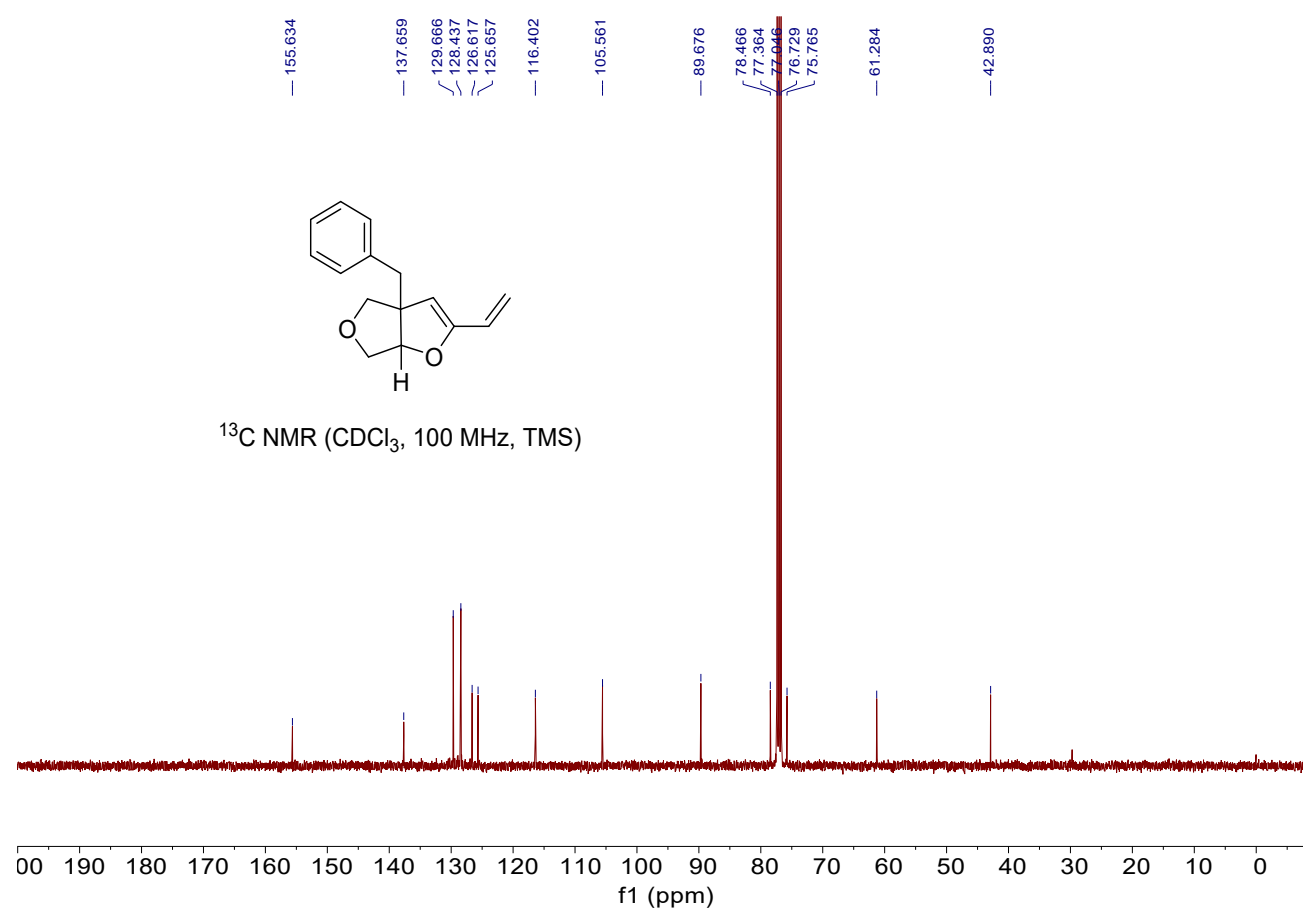

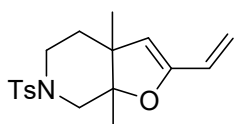

### 3a,7a-dimethyl-6-tosyl-2-vinyl-3a,4,5,6,7,7a-hexahydrofuro[2,3-c]pyridine (2ae)

A colorless oil, 80% yield, 26.6 mg.  $^1\text{H}$  NMR ( $\text{CDCl}_3$ , TMS, 400 MHz)  $\delta$  7.63 (d,  $J = 8.4$  Hz, 2H), 7.29 (d,  $J = 8.4$  Hz, 2H), 6.03 (dd,  $J = 17.2, 10.8$  Hz, 1H), 5.33 (dd,  $J = 17.2, 1.2$  Hz, 1H), 5.09 (dd,  $J = 10.8, 1.8$  Hz, 1H), 4.62 (s, 1H), 3.61 – 3.51 (m, 1H), 3.37 (dd,  $J = 12.0, 1.6$  Hz, 1H), 2.71 (d,  $J = 12.0$  Hz, 1H), 2.57 (td,  $J = 11.2, 4.4$  Hz, 1H), 2.41 (s, 3H), 1.77 – 1.61 (m, 2H), 1.42 (s, 3H), 1.01 (s, 3H).  $^{13}\text{C}$  NMR ( $\text{CDCl}_3$ , TMS, 100 MHz)  $\delta$  153.1, 143.3, 134.1, 129.7, 127.5, 126.0, 115.7, 110.5, 85.4, 51.7, 46.6, 43.3, 33.5, 24.3, 21.5, 19.2. IR (neat)  $\nu$  668, 1162, 1227, 1505, 1566, 2925, 2968, 3034  $\text{cm}^{-1}$ . HRMS (ESI) calcd. for  $\text{C}_{18}\text{H}_{23}\text{NO}_3\text{NaS}$  (M) $^+$ : 356.1291, Found: 356.1283.

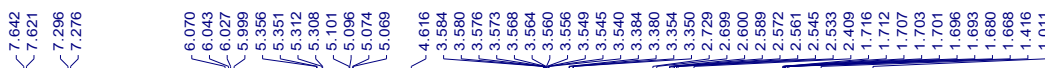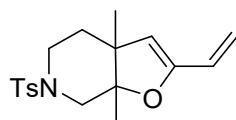

$^1\text{H}$  NMR ( $\text{CDCl}_3$ , 400 MHz, TMS)

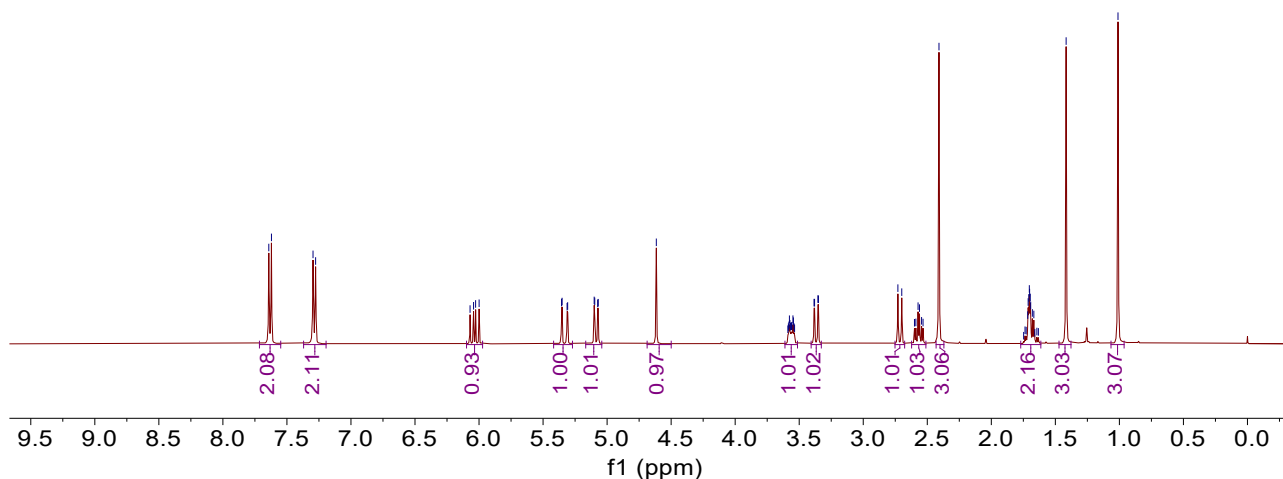

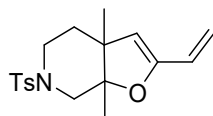

$^{13}\text{C}$  NMR ( $\text{CDCl}_3$ , 100 MHz, TMS)

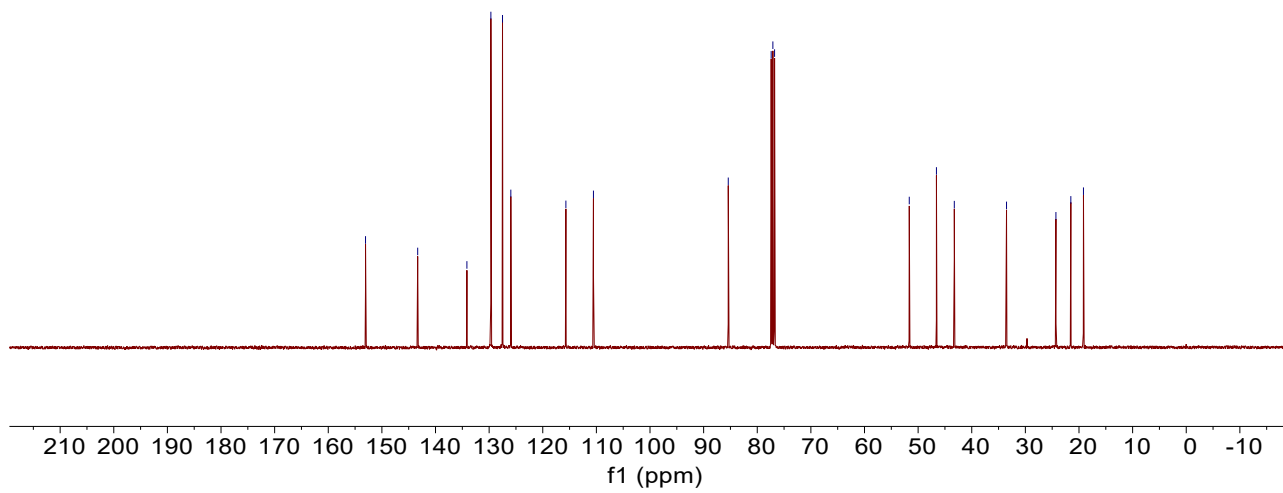

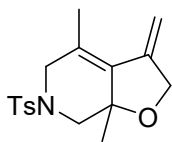

### 4,7a-dimethyl-3-methylene-6-tosyl-2,3,5,6,7,7a-hexahydrofuro[2,3-c]pyridine (3a)

A colorless oil, 92% yield, 29.4 mg.  $^1\text{H}$  NMR ( $\text{CDCl}_3$ , TMS, 400 MHz)  $\delta$  7.69 (d,  $J = 8.0$  Hz, 2H), 7.33 (d,  $J = 8.0$  Hz, 2H), 5.19 (s, 1H), 5.11 (s, 1H), 4.52 (dt,  $J = 13.2, 2.4$  Hz, 1H), 4.36 (dt,  $J = 13.2, 2.4$  Hz, 1H), 4.12 (d,  $J = 17.2$  Hz, 1H), 3.92 (d,  $J = 10.0$  Hz, 1H), 3.02 (d,  $J = 17.2$  Hz, 1H), 2.43 (s, 3H), 2.30 (d,  $J = 10.0$  Hz, 1H), 1.79 (s, 3H), 1.34 (s, 3H).  $^{13}\text{C}$  NMR ( $\text{CDCl}_3$ , TMS, 150 MHz)  $\delta$  143.7, 142.7, 134.6, 133.4, 129.8, 127.5, 124.0, 107.4, 79.6, 69.9, 52.6, 49.6, 22.4, 21.5, 16.2. IR (neat)  $\nu$  667, 813, 1163, 1326, 1598, 2861, 2925, 2976  $\text{cm}^{-1}$ . HRMS (ESI) calcd. for  $\text{C}_{17}\text{H}_{21}\text{NO}_3\text{SNa}$  ( $\text{M}+\text{Na}$ ) $^+$ : 342.1134, Found: 342.1133.

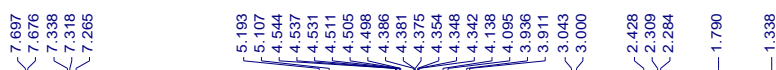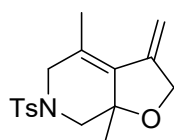

$^1\text{H}$  NMR ( $\text{CDCl}_3$ , 400 MHz, TMS)

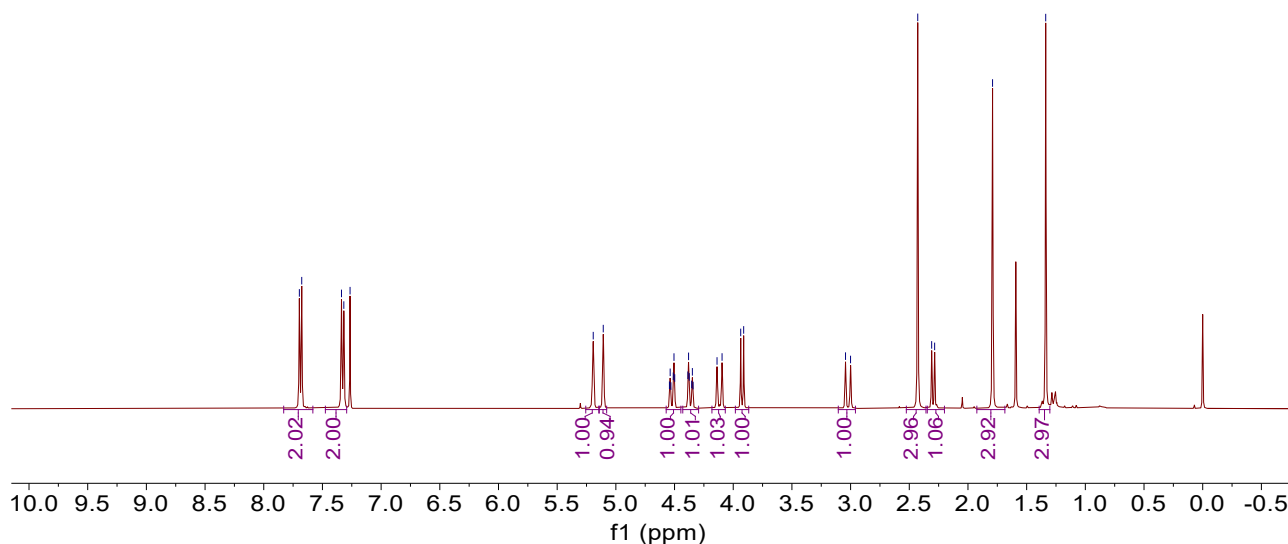

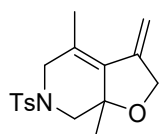

$^{13}\text{C}$  NMR ( $\text{CDCl}_3$ , 150 MHz, TMS)

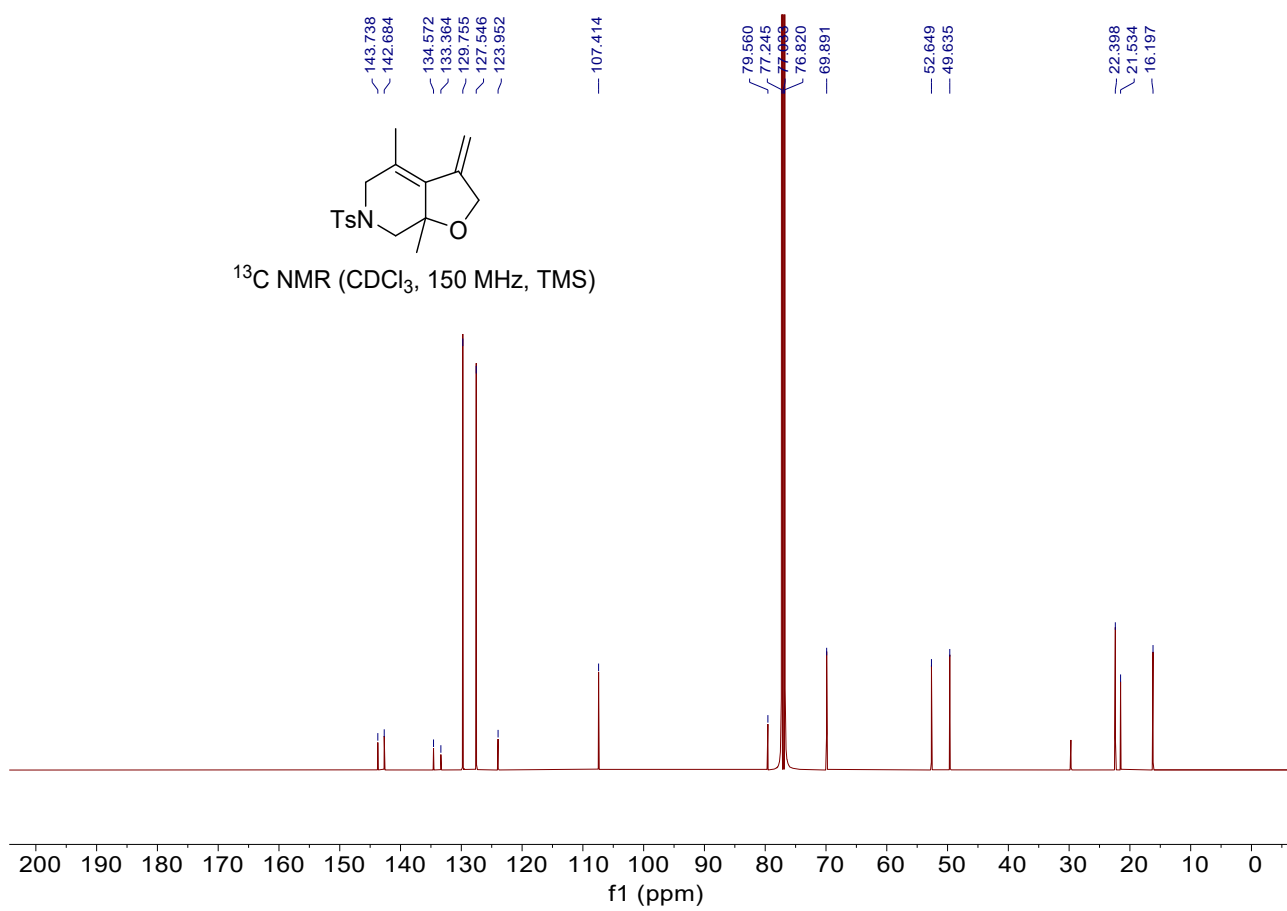

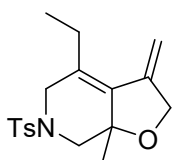

#### 4-ethyl-7a-methyl-3-methylene-6-tosyl-2,3,5,6,7,7a-hexahydrofuro[2,3-c]pyridine (3b)

A colorless oil, 80% yield, 26.6 mg.  $^1\text{H}$  NMR ( $\text{CDCl}_3$ , TMS, 400 MHz)  $\delta$  7.69 (d,  $J = 8.0$  Hz, 2H), 7.33 (d,  $J = 8.0$  Hz, 2H), 5.18 (s, 1H), 5.08 (s, 1H), 4.51 (dt,  $J = 13.2, 2.4$  Hz, 1H), 4.36 (dt,  $J = 13.2, 2.4$  Hz, 1H), 4.19 (d,  $J = 17.2$  Hz, 1H), 3.91 (d,  $J = 10.0$  Hz, 1H), 3.01 (d,  $J = 17.2$  Hz, 1H), 2.49 – 2.34 (m, 4H), 2.27 (d,  $J = 10.0$  Hz, 1H), 1.92 (q,  $J = 7.6$  Hz, 1H), 1.34 (s, 3H), 1.07 (t,  $J = 7.6$  Hz, 3H).  $^{13}\text{C}$  NMR ( $\text{CDCl}_3$ , TMS, 150 MHz)  $\delta$  143.7, 142.1, 134.0, 133.3, 130.3, 129.8, 127.6, 106.8, 79.5, 69.9, 52.7, 48.1, 23.4, 22.5, 21.5, 12.8. IR (neat)  $\nu$  668, 815, 1162, 1350, 1598, 2869, 2927, 2976  $\text{cm}^{-1}$ . HRMS (ESI) calcd. for  $\text{C}_{18}\text{H}_{23}\text{NO}_3\text{SNa}$  ( $\text{M}+\text{Na}$ ) $^+$ : 356.1291, Found: 356.1289.

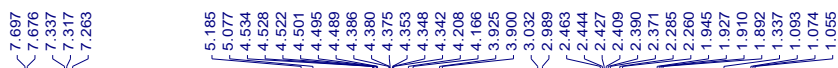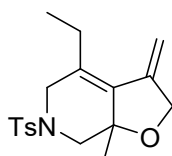

$^1\text{H}$  NMR ( $\text{CDCl}_3$ , 400 MHz, TMS)

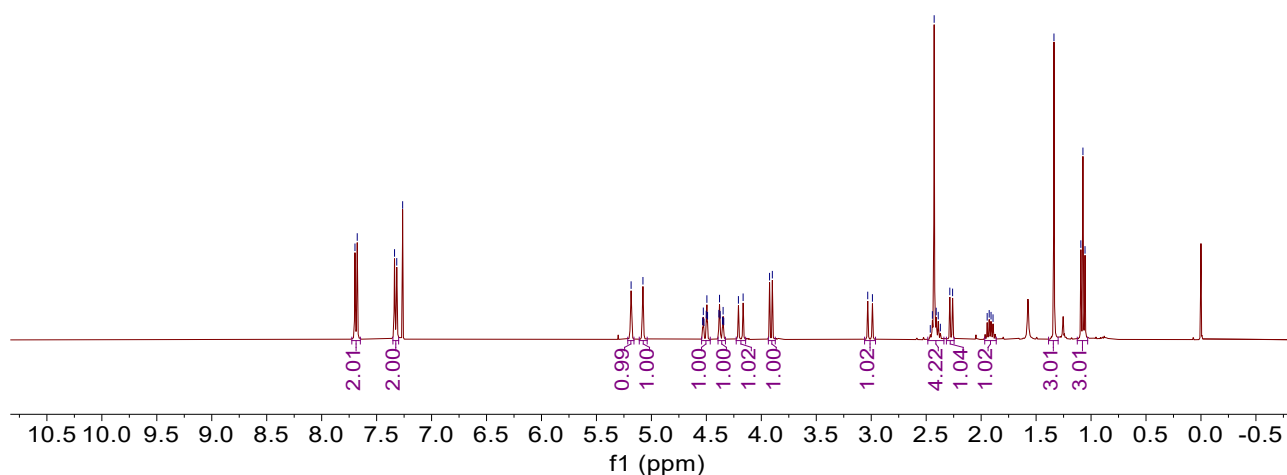

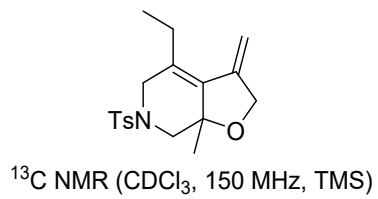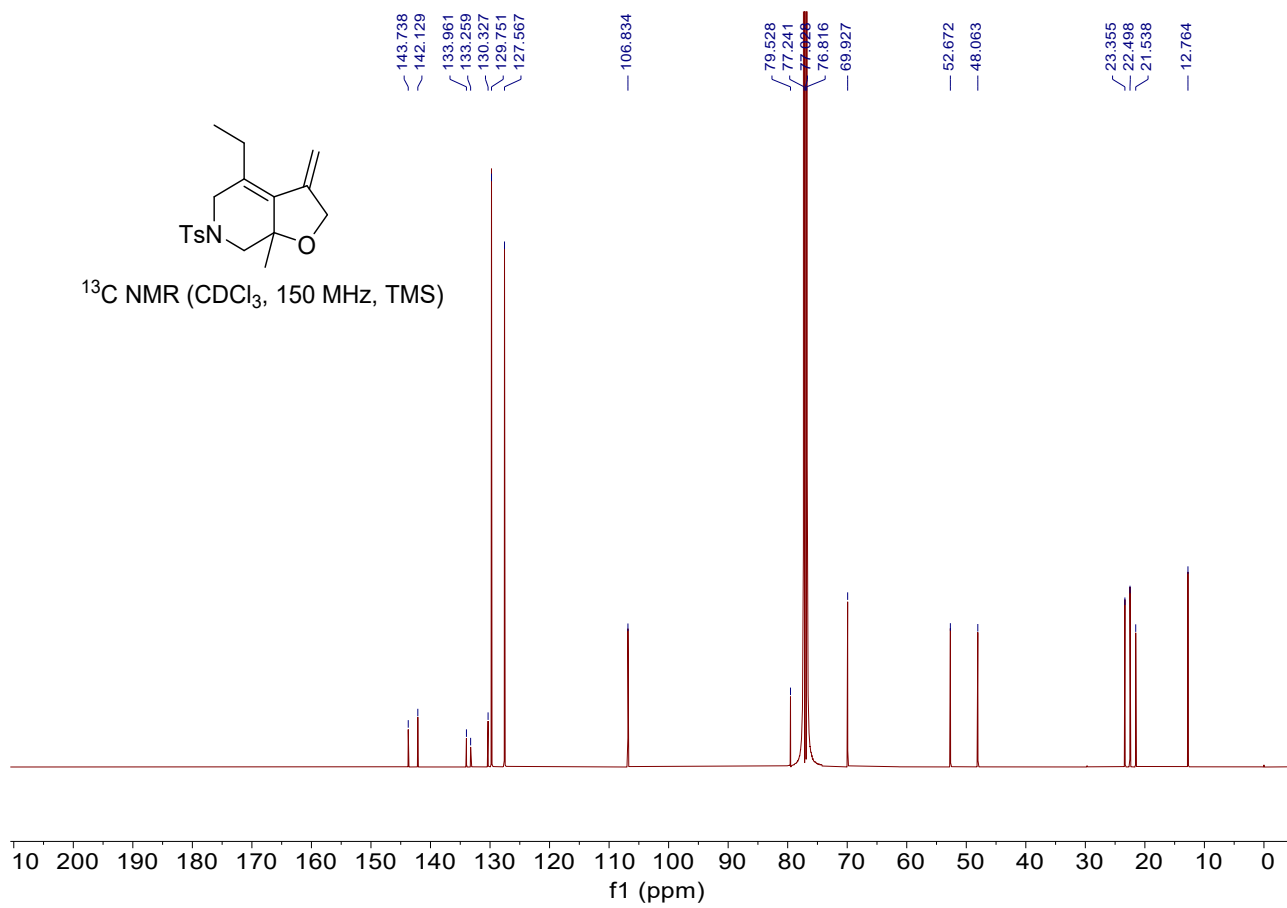



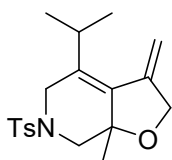

#### 4-isopropyl-7a-methyl-3-methylene-6-tosyl-2,3,5,6,7,7a-hexahydrofuro[2,3-c]pyridine (3c)

A colorless oil, 82% yield, 28.4 mg.  $^1\text{H}$  NMR ( $\text{CDCl}_3$ , TMS, 400 MHz)  $\delta$  7.68 (d,  $J = 8.0$  Hz, 2H), 7.33 (d,  $J = 8.0$  Hz, 2H), 5.20 (s, 1H), 5.11 (s, 1H), 4.49 (dt,  $J = 12.8, 2.4$  Hz, 1H), 4.36 (dt,  $J = 12.8, 2.4$  Hz, 1H), 4.12 (d,  $J = 17.2$  Hz, 1H), 3.88 (d,  $J = 10.0$  Hz, 1H), 3.19 – 3.04 (m, 2H), 2.43 (s, 3H), 2.23 (d,  $J = 10.0$  Hz, 1H), 1.32 (s, 3H), 1.13 (d,  $J = 7.0$  Hz, 3H), 0.94 (d,  $J = 7.0$  Hz, 3H).  $^{13}\text{C}$  NMR ( $\text{CDCl}_3$ , TMS, 150 MHz)  $\delta$  143.7, 142.0, 133.8, 133.2, 133.0, 129.8, 127.6, 107.5, 79.4, 70.0, 52.6, 44.1, 28.2, 22.6, 21.8, 21.5, 19.6. IR (neat)  $\nu$  668, 813, 1164, 1351, 1597, 2853, 2927, 2966  $\text{cm}^{-1}$ . HRMS (ESI) calcd. for  $\text{C}_{19}\text{H}_{25}\text{NO}_3\text{SNa}$  ( $\text{M}+\text{Na}$ ) $^+$ : 370.1447, Found: 370.1448.

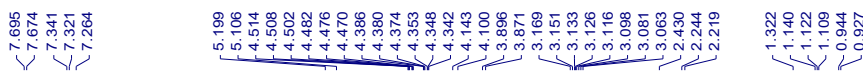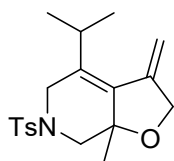

$^1\text{H}$  NMR ( $\text{CDCl}_3$ , 400 MHz, TMS)

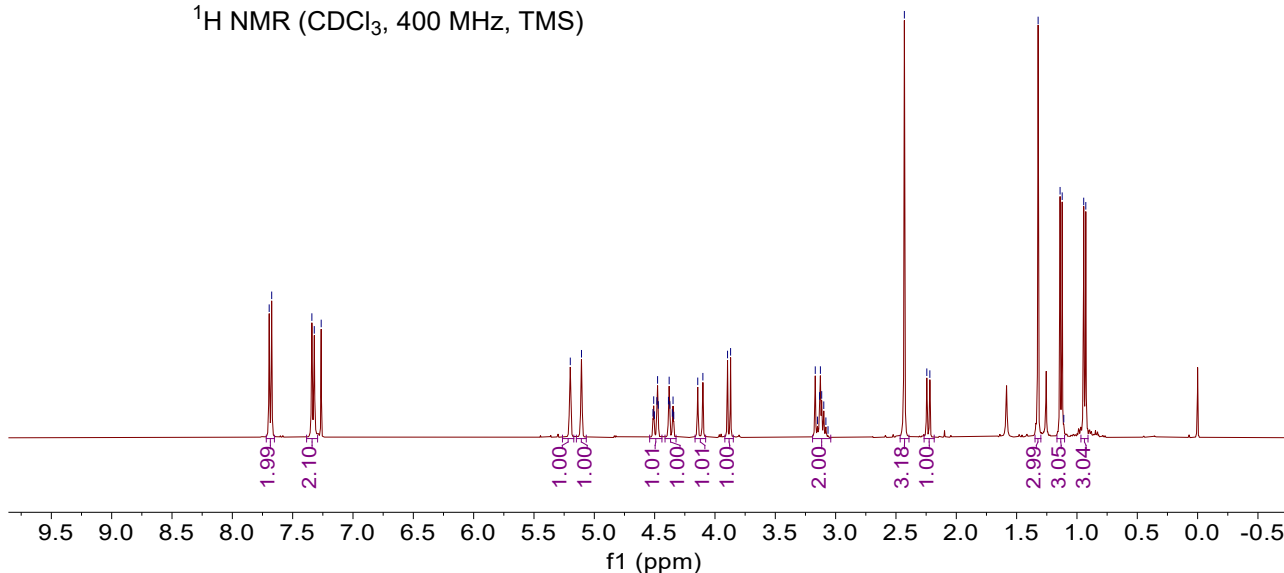

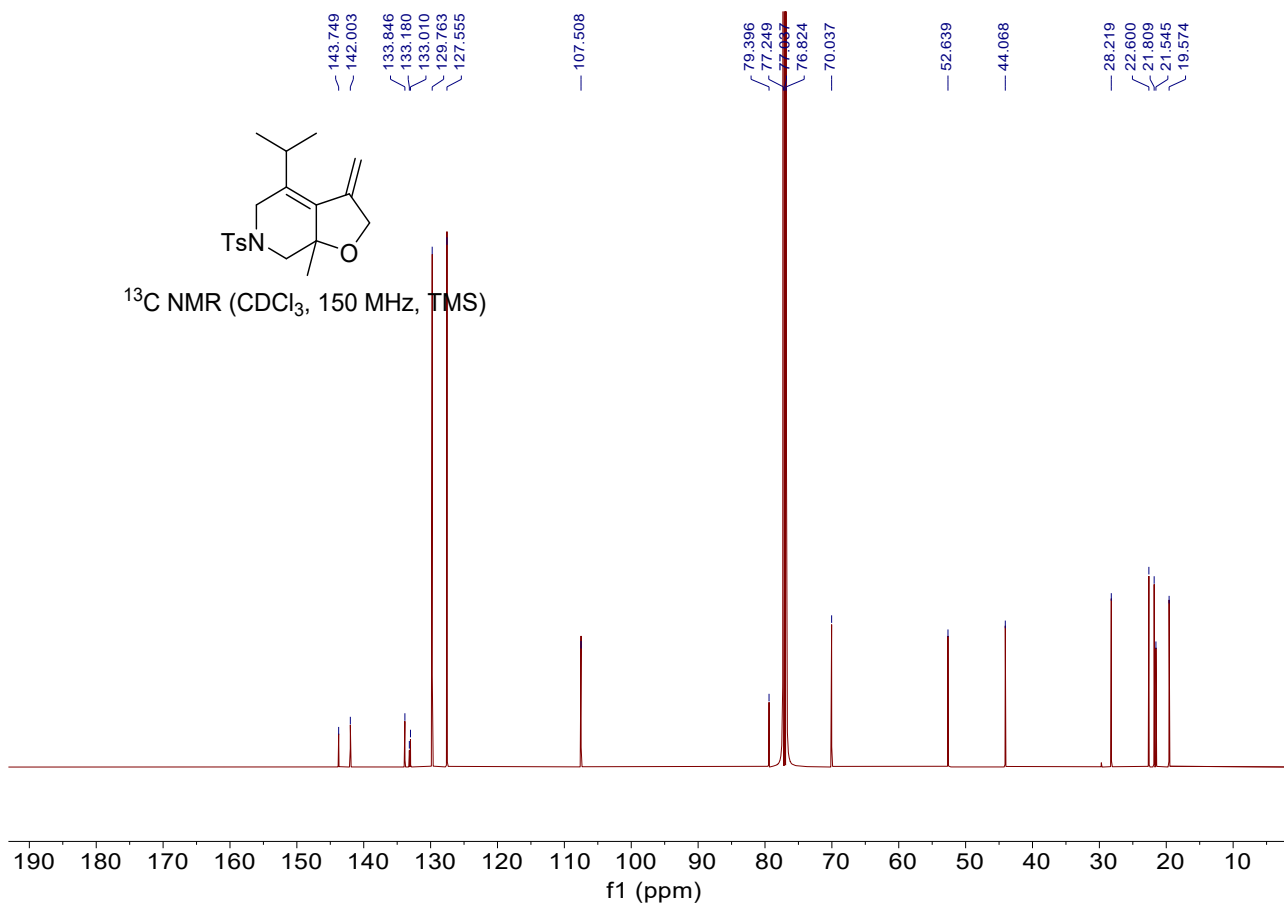

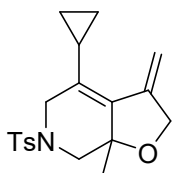

### 4-cyclopropyl-7a-methyl-3-methylene-6-tosyl-2,3,5,6,7,7a-hexahydrofuro[2,3-c]pyridine (3d)

A colorless oil, 86% yield, 29.6 mg.  $^1\text{H}$  NMR ( $\text{CDCl}_3$ , TMS, 400 MHz)  $\delta$  7.67 (d,  $J = 8.0$  Hz, 2H), 7.33 (d,  $J = 8.0$  Hz, 2H), 5.45 (s, 1H), 5.17 (s, 1H), 4.54 (dt,  $J = 12.8, 2.4$  Hz, 1H), 4.38 (dt,  $J = 12.8, 2.4$  Hz, 1H), 3.90 (d,  $J = 10.0$  Hz, 1H), 3.85 (d,  $J = 17.2$  Hz, 1H), 2.96 (d,  $J = 17.2$  Hz, 1H), 2.43 (s, 3H), 2.26 (d,  $J = 10.0$  Hz, 1H), 1.77 – 1.67 (m, 1H), 1.33 (s, 3H), 0.88 – 0.78 (m, 1H), 0.69 – 0.57 (m, 2H), 0.54 – 0.44 (m, 1H).  $^{13}\text{C}$  NMR ( $\text{CDCl}_3$ , TMS, 150 MHz)  $\delta$  143.8, 142.3, 136.2, 133.3, 129.8, 127.5, 127.3, 108.1, 79.6, 69.9, 52.5, 46.0, 22.5, 21.5, 12.4, 6.7, 4.3. IR (neat)  $\nu$  663, 816, 1166, 1351, 1586, 2872, 2916, 2963  $\text{cm}^{-1}$ . HRMS (ESI) calcd. for  $\text{C}_{19}\text{H}_{23}\text{NO}_3\text{SNa}$  ( $\text{M}+\text{Na}$ ) $^+$ : 368.1291, Found: 368.1288.

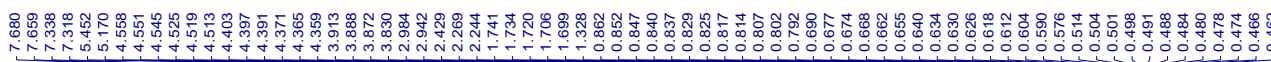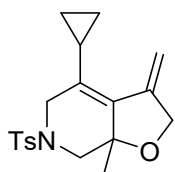

$^1\text{H}$  NMR ( $\text{CDCl}_3$ , 400 MHz, TMS)

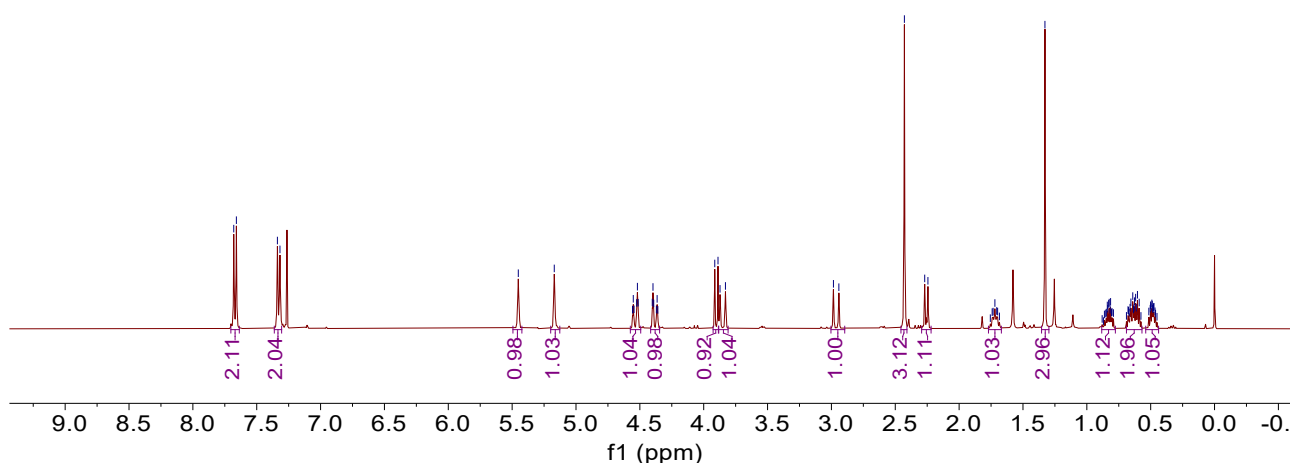

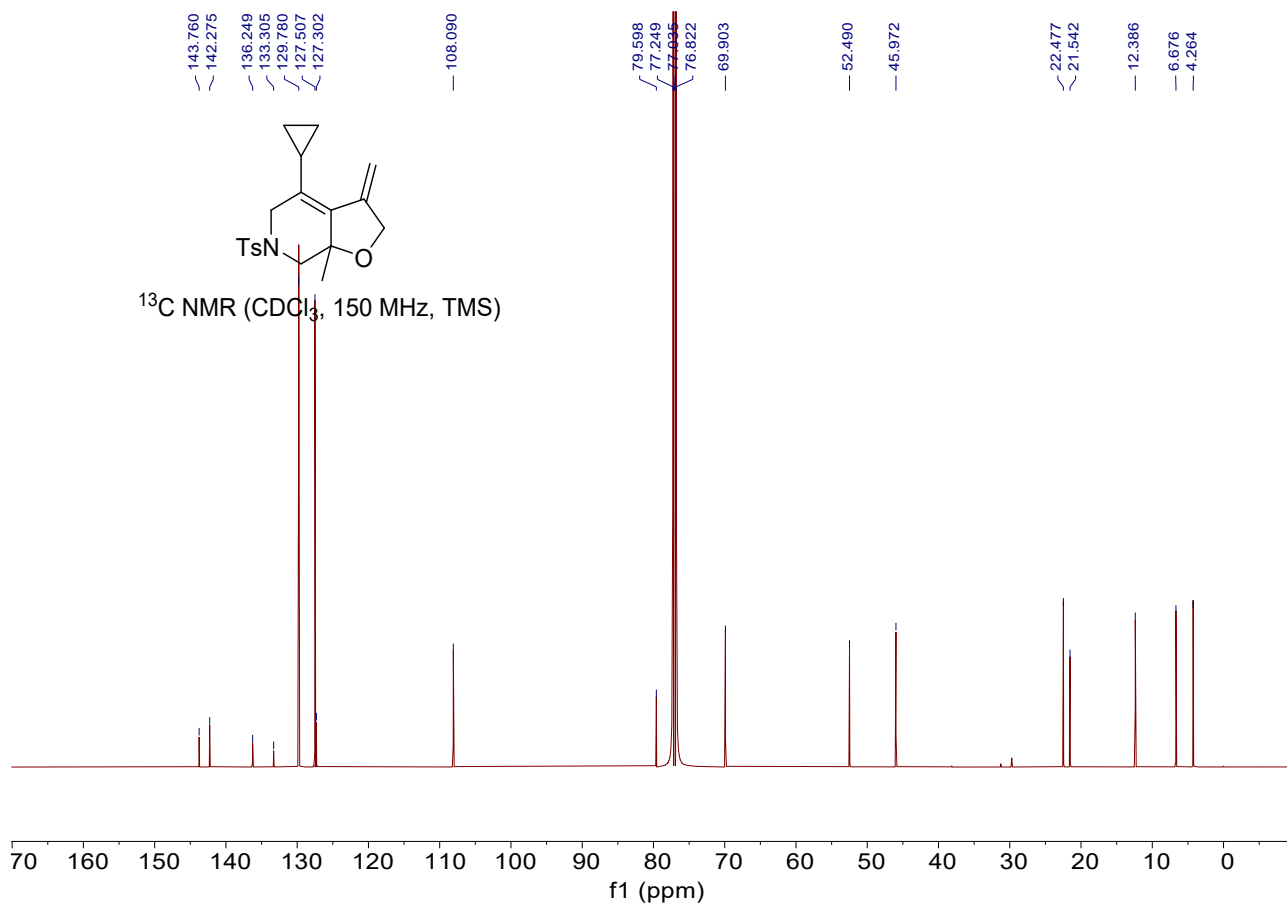

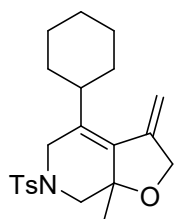

#### 4-cyclohexyl-7a-methyl-3-methylene-6-tosyl-2,3,5,6,7,7a-hexahydrofuro[2,3-c]pyridine (3e)

A colorless oil, 82% yield, 31.6 mg.  $^1\text{H}$  NMR ( $\text{CDCl}_3$ , TMS, 400 MHz)  $\delta$  7.68 (d,  $J = 8.0$  Hz, 2H), 7.33 (d,  $J = 8.0$  Hz, 2H), 5.19 – 5.02 (m, 2H), 4.50 (dt,  $J = 12.8, 2.4$  Hz, 1H), 4.37 (dt,  $J = 12.8, 2.4$  Hz, 1H), 4.13 (d,  $J = 17.0$  Hz, 1H), 3.88 (d,  $J = 10.0$  Hz, 1H), 3.12 (d,  $J = 17.2$  Hz, 1H), 2.76 – 2.61 (m, 1H), 2.43 (s, 3H), 2.22 (d,  $J = 10.0$  Hz, 1H), 1.88 – 1.60 (m, 4H), 1.55 – 1.09 (m, 9H).  $^{13}\text{C}$  NMR ( $\text{CDCl}_3$ , TMS, 100 MHz) 143.7, 142.0, 133.8, 133.2, 133.0, 129.8, 127.5, 107.4, 79.4, 70.1, 52.6, 45.1, 39.1, 32.2, 29.8, 29.7, 26.5, 26.1, 25.9, 22.7, 21.5. IR (neat)  $\nu$  668, 815, 1164, 1351, 1597, 2853, 2927, 2966  $\text{cm}^{-1}$ . HRMS (ESI) calcd. for  $\text{C}_{22}\text{H}_{29}\text{NO}_3\text{SNa}$  ( $\text{M}+\text{Na}$ ) $^+$ : 410.1760, Found: 410.1767.

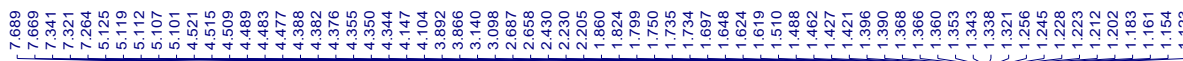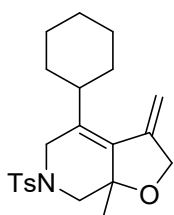

$^1\text{H}$  NMR ( $\text{CDCl}_3$ , 400 MHz, TMS)

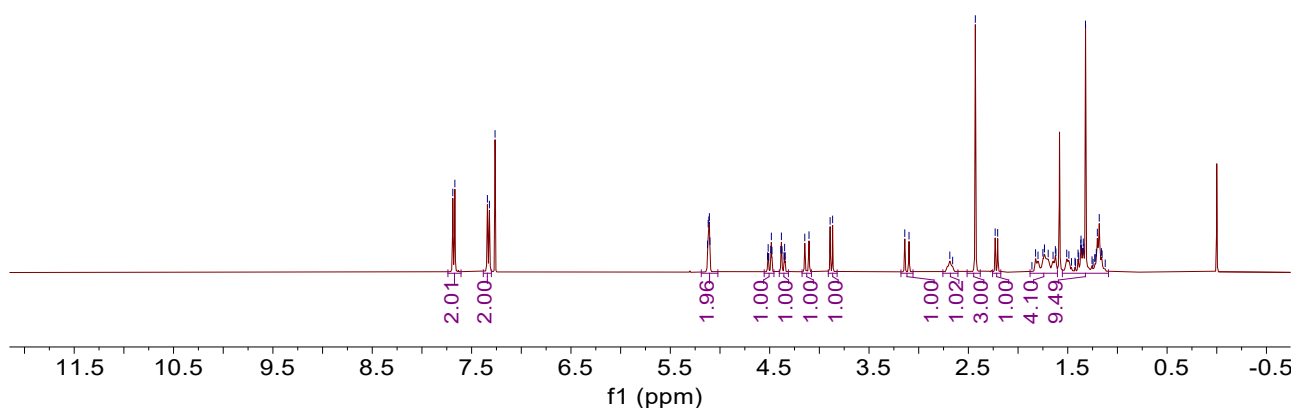

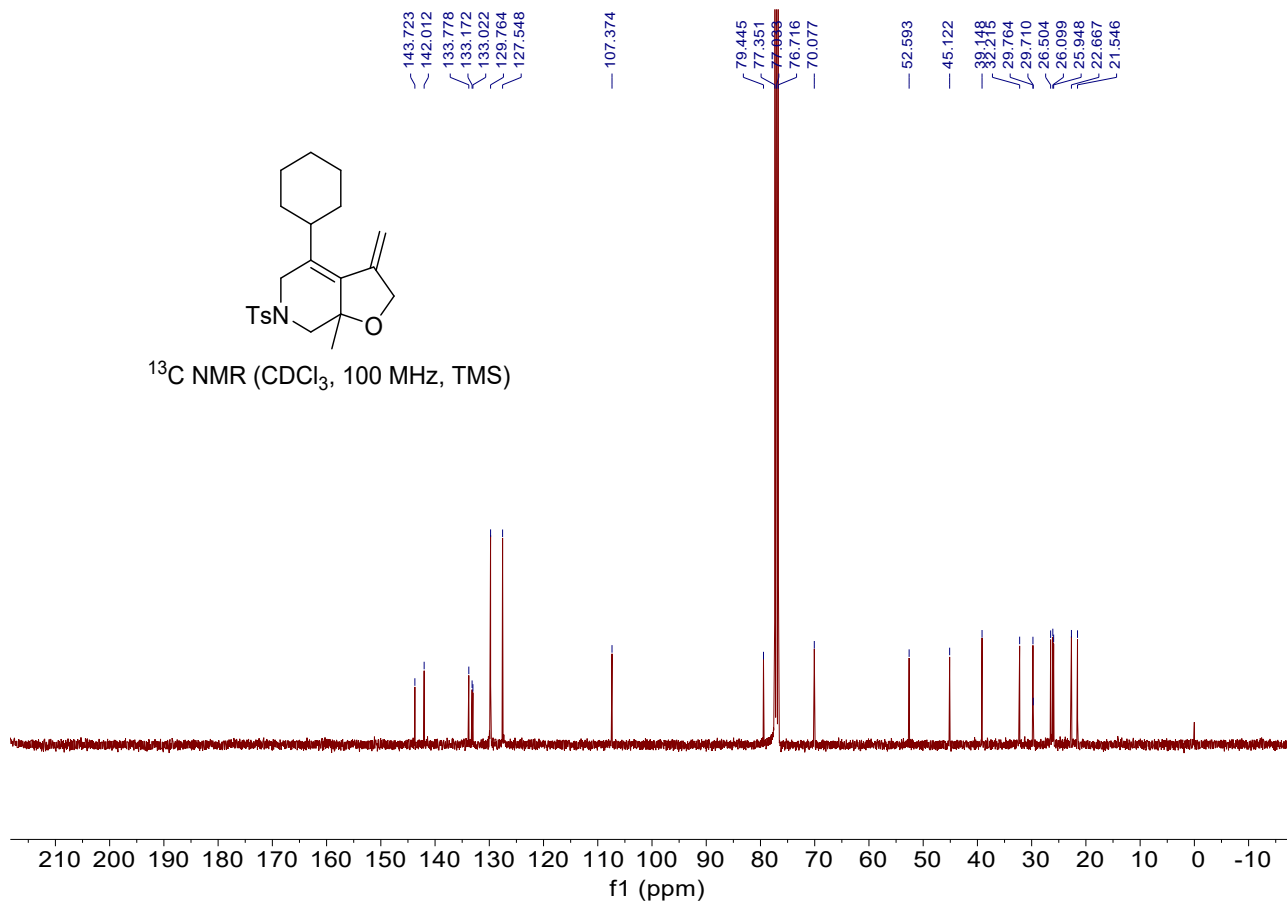

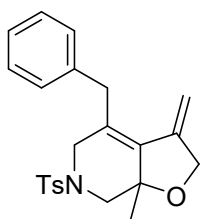

#### 4-cyclohexyl-7a-methyl-3-methylene-6-tosyl-2,3,5,6,7,7a-hexahydrofuro[2,3-c]pyridine (3f)

A yellow oil, 86% yield, 33.6 mg.  $^1\text{H}$  NMR ( $\text{CDCl}_3$ , TMS, 400 MHz)  $\delta$  7.62 (d,  $J = 8.4$  Hz, 2H), 7.36 – 7.17 (m, 5H), 7.10 (d,  $J = 6.8$  Hz, 2H), 5.22 (s, 1H), 5.05 (s, 1H), 4.56 (dt,  $J = 13.2, 2.4$  Hz, 1H), 4.42 (dt,  $J = 13.2, 2.4$  Hz, 1H), 4.08 (d,  $J = 17.4$  Hz, 1H), 3.95 (d,  $J = 10.0$  Hz, 1H), 3.80 (d,  $J = 15.6$  Hz, 1H), 3.28 (d,  $J = 15.6$  Hz, 1H), 3.01 (d,  $J = 17.4$  Hz, 1H), 2.42 (s, 3H), 2.34 (d,  $J = 10.0$  Hz, 1H), 1.43 (s, 3H).  $^{13}\text{C}$  NMR ( $\text{CDCl}_3$ , TMS, 100 MHz)  $\delta$  143.7, 142.0, 137.5, 136.8, 133.1, 129.7, 128.9, 127.9, 127.5, 126.7, 126.2, 107.4, 79.7, 69.9, 52.7, 48.6, 35.8, 22.6, 21.5. IR (neat)  $\nu$  668, 815, 1162, 1351, 1557, 2869, 2927, 2966  $\text{cm}^{-1}$ . HRMS (ESI) calcd. for  $\text{C}_{23}\text{H}_{25}\text{NO}_3\text{SNa}$  ( $\text{M}+\text{Na}$ ) $^+$ : 418.1447, Found: 418.1444.

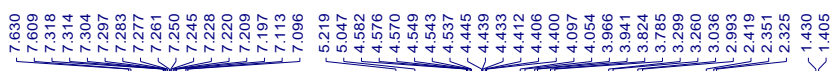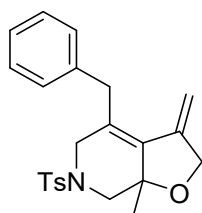

$^1\text{H}$  NMR ( $\text{CDCl}_3$ , 400 MHz, TMS)

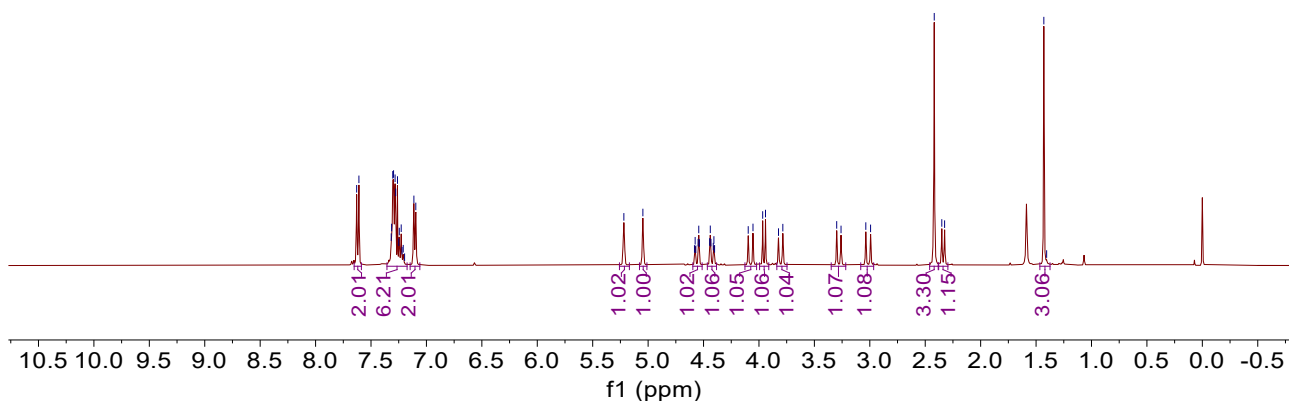

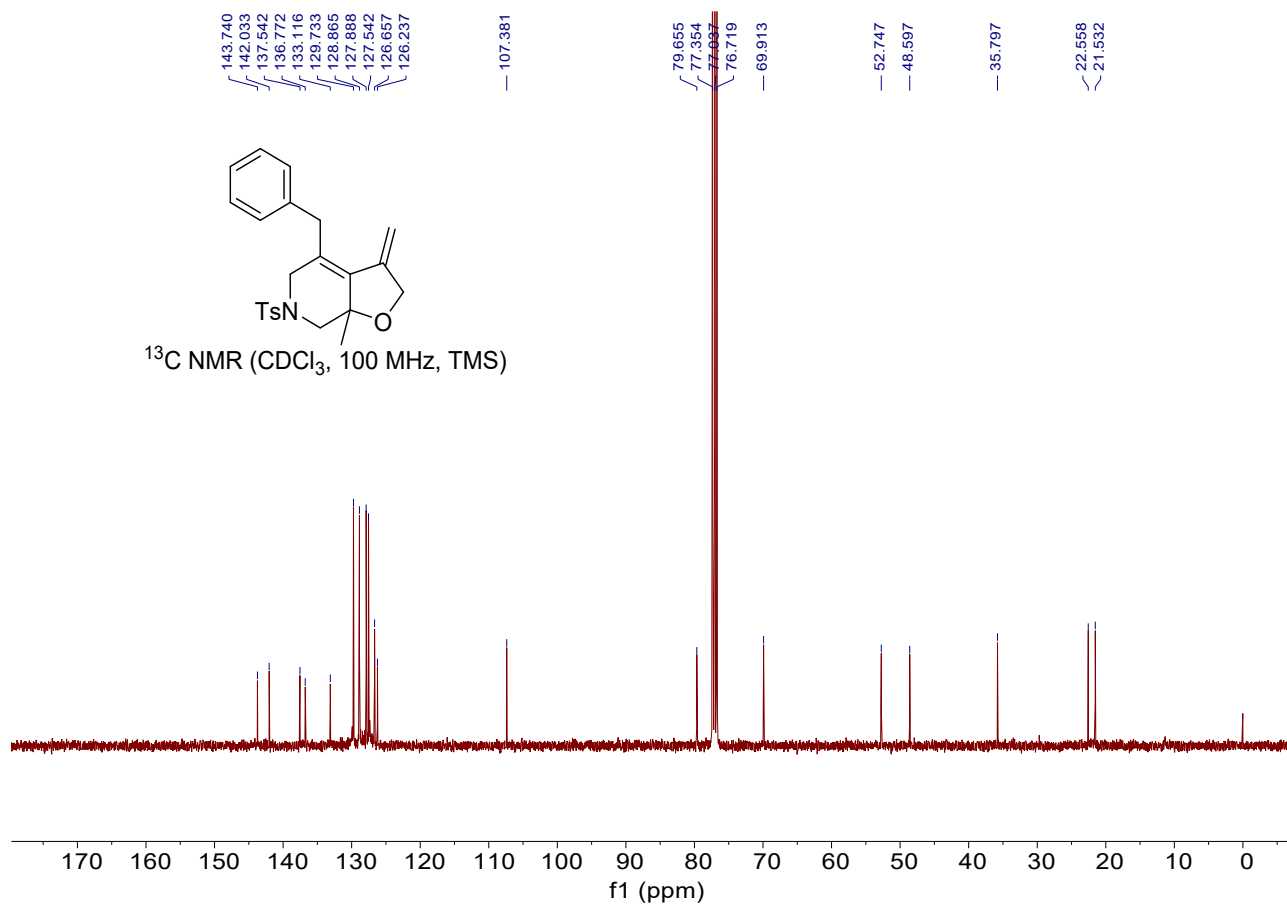



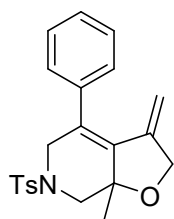

**7a-methyl-3-methylene-4-phenyl-6-tosyl-2,3,5,6,7,7a-hexahydrofuro[2,3-c]pyridine (3i)**

A yellow oil, 76% yield, 29.0 mg.  $^1\text{H}$  NMR ( $\text{CDCl}_3$ , TMS, 400 MHz)  $\delta$  7.66 (d,  $J = 8.4$  Hz, 2H), 7.41 – 7.28 (m, 5H), 7.19 – 7.13 (m, 2H), 4.73 (d,  $J = 2.4$  Hz, 1H), 4.55 – 4.30 (m, 4H), 4.04 (d,  $J = 10.4$  Hz, 1H), 3.23 (d,  $J = 17.6$  Hz, 1H), 2.46 (d,  $J = 10.4$  Hz, 1H), 2.42 (s, 3H), 1.46 (s, 3H).  $^{13}\text{C}$  NMR ( $\text{CDCl}_3$ , TMS, 100 MHz)  $\delta$  143.8, 141.0, 136.9, 135.8, 133.4, 129.8, 128.9, 128.2, 128.1, 127.8, 127.5, 107.8, 79.7, 69.8, 52.5, 49.9, 38.2, 31.3, 29.7, 22.3, 21.5. IR (neat)  $\nu$  668, 816, 1162, 1351, 1558, 2872, 2919, 2966  $\text{cm}^{-1}$ . HRMS (ESI) calcd. for  $\text{C}_{22}\text{H}_{23}\text{NO}_3\text{SNa}$  ( $\text{M}+\text{Na}$ ) $^+$ : 404.1291, Found: 404.1292.

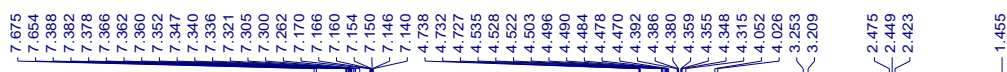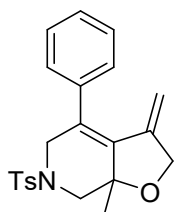

$^1\text{H}$  NMR ( $\text{CDCl}_3$ , 400 MHz, TMS)

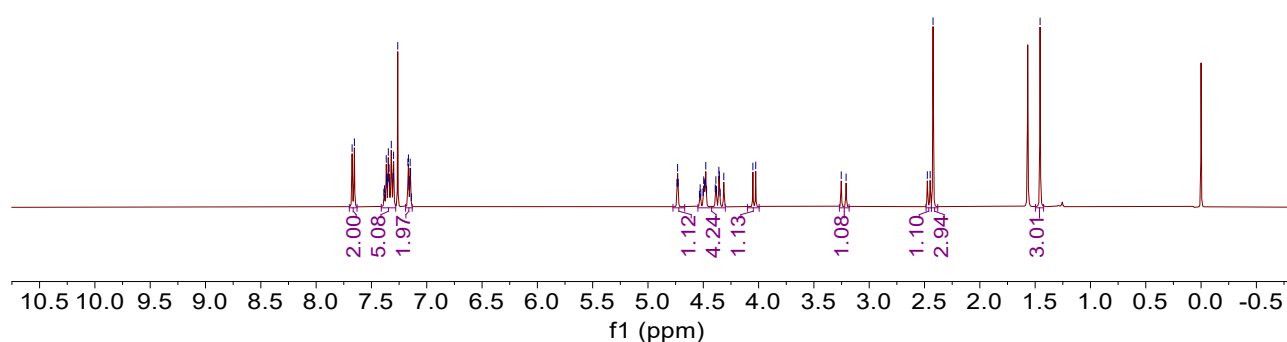

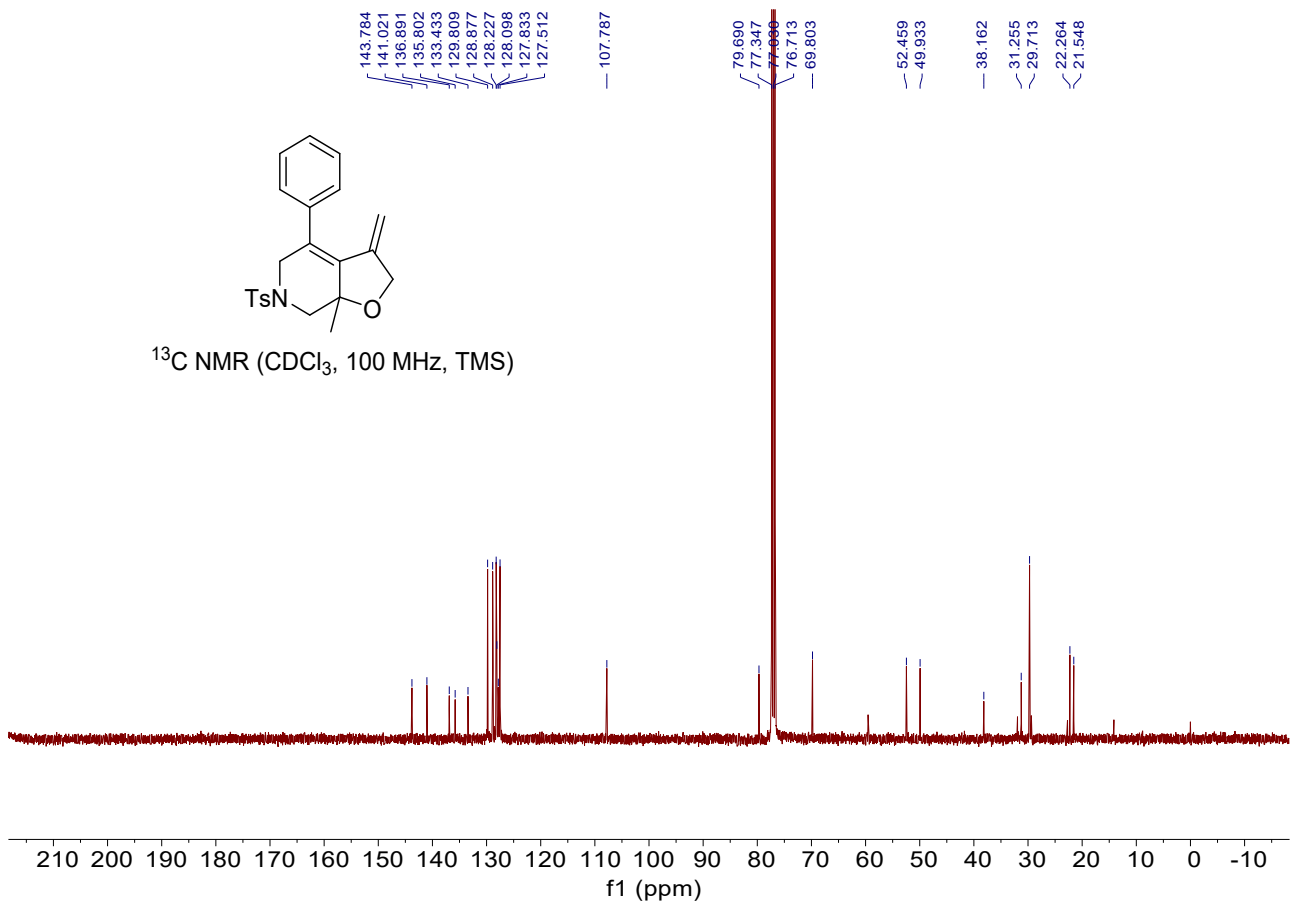

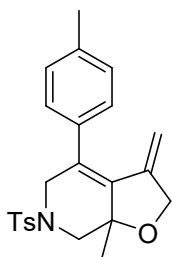

**7a-methyl-3-methylene-4-(p-tolyl)-6-tosyl-2,3,5,6,7,7a-hexahydrofuro[2,3-c]pyridine (3j)**

A colorless oil, 72% yield, 28.4 mg.  $^1\text{H}$  NMR ( $\text{CDCl}_3$ , TMS, 400 MHz)  $\delta$  7.66 (d,  $J = 8.2$  Hz, 2H), 7.30 (d,  $J = 8.0$  Hz, 2H), 7.17 (d,  $J = 8.2$  Hz, 2H), 7.05 (d,  $J = 8.0$  Hz, 2H), 4.73 (s, 1H), 4.54 (s, 1H), 4.51 (dt,  $J = 13.0, 2.4$  Hz, 1H), 4.37 (dt,  $J = 13.0, 2.4$  Hz, 1H), 4.31 (d,  $J = 17.6$  Hz, 1H), 4.03 (d,  $J = 10.2$  Hz, 1H), 3.21 (d,  $J = 17.6$  Hz, 1H), 2.45 (d,  $J = 10.2$  Hz, 1H), 2.42 (s, 3H), 2.35 (s, 3H), 1.45 (s, 3H).  $^{13}\text{C}$  NMR ( $\text{CDCl}_3$ , TMS, 100 MHz)  $\delta$  143.7, 141.1, 137.9, 135.6, 133.9, 133.4, 132.3, 129.8, 129.5, 128.1, 127.8, 127.5, 107.6, 79.7, 69.8, 52.5, 50.0, 22.3, 21.5, 21.3. IR (neat)  $\nu$  680, 1218, 1364, 1569, 2963, 3021  $\text{cm}^{-1}$ . HRMS (ESI) calcd. for  $\text{C}_{23}\text{H}_{25}\text{NO}_3\text{SNa}$  ( $\text{M}+\text{Na}$ ) $^+$ : 418.1447, Found: 418.1449.

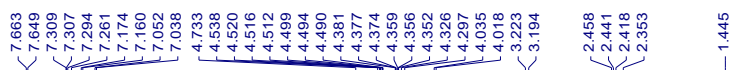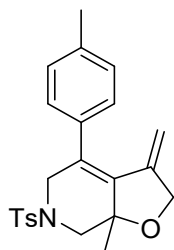

$^1\text{H}$  NMR ( $\text{CDCl}_3$ , 400 MHz, TMS)

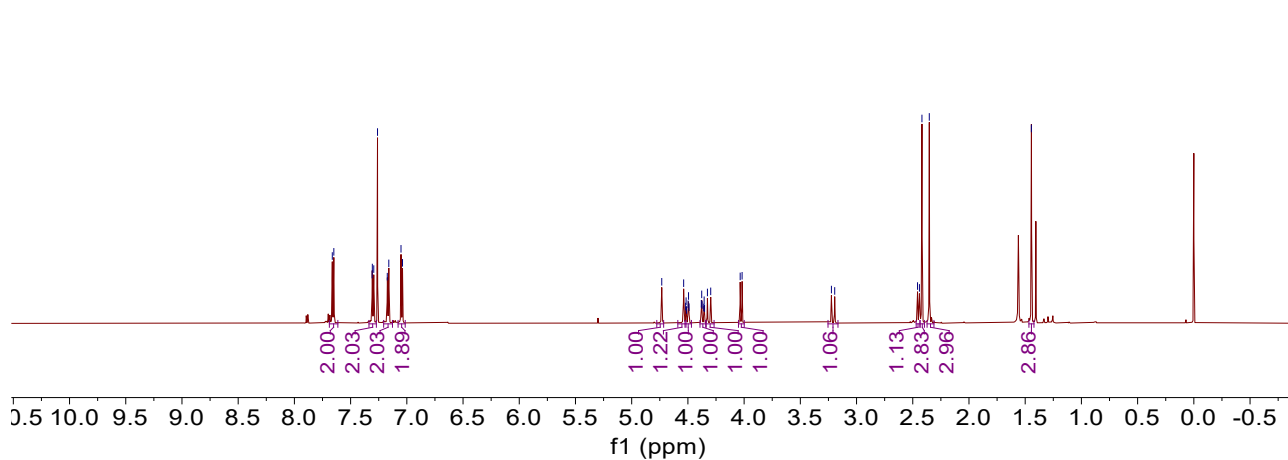

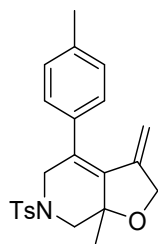

$^{13}\text{C}$  NMR ( $\text{CDCl}_3$ , 100 MHz, TMS)

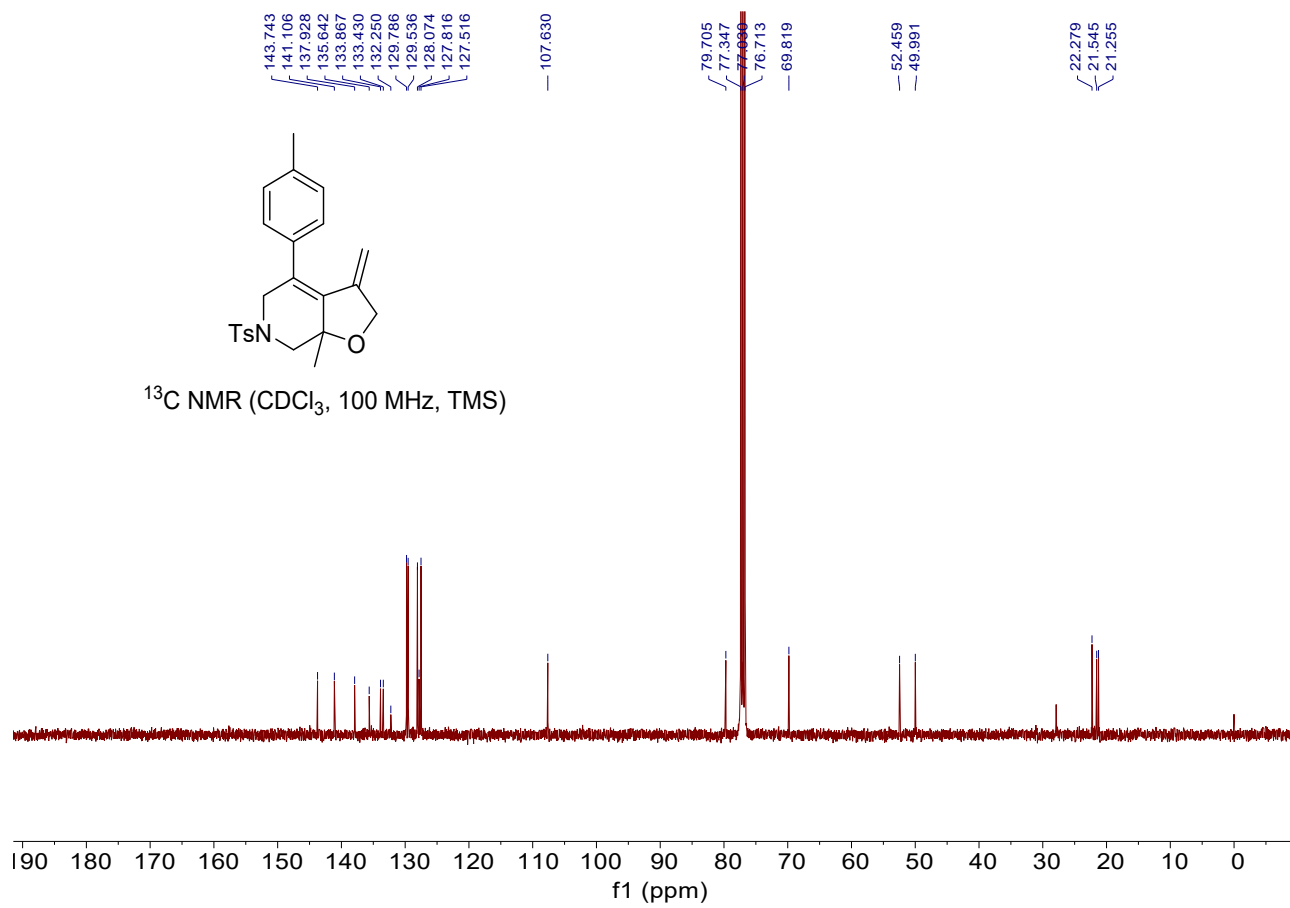

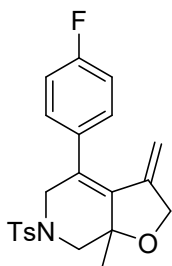

**4-(4-fluorophenyl)-7a-methyl-3-methylene-6-tosyl-2,3,5,6,7,7a-hexahydrofuro[2,3-c]pyridine (3k)**

A yellow oil, 76% yield, 30.4 mg.  $^1\text{H}$  NMR ( $\text{CDCl}_3$ , TMS, 400 MHz)  $\delta$  7.67 (d,  $J = 8.4$  Hz, 2H), 7.32 (d,  $J = 8.4$  Hz, 2H), 7.17 – 7.11 (m, 2H), 7.08 – 7.02 (m, 2H), 4.79 – 4.73 (m, 1H), 4.54 – 4.47 (m, 2H), 4.37 (dt,  $J = 12.8, 2.4$  Hz, 1H), 4.31 (d,  $J = 17.6$  Hz, 1H), 4.03 (d,  $J = 10.4$  Hz, 1H), 3.20 (d,  $J = 17.6$  Hz, 1H), 2.45 (d,  $J = 10.8$  Hz, 1H), 2.42 (s, 3H), 1.44 (s, 3H).  $^{13}\text{C}$  NMR ( $\text{CDCl}_3$ , TMS, 150 MHz)  $\delta$  162.5 (d,  $J_{\text{C-F}} = 248.9$  Hz), 143.9, 141.0, 136.4, 133.4, 132.70, 132.67, 130.1 (d,  $J_{\text{C-F}} = 8.3$  Hz), 129.8, 127.5, 126.8, 116.0 (d,  $J_{\text{C-F}} = 21.6$  Hz), 108.0, 79.7, 69.7, 52.4, 49.9, 22.2, 21.6.  $^{19}\text{F}$  NMR (564 MHz,  $\text{CDCl}_3$ )  $\delta$  -113.3. IR (neat)  $\nu$  660, 837, 1022, 1351, 2858, 2918  $\text{cm}^{-1}$ . HRMS (ESI) calcd. for  $\text{C}_{22}\text{H}_{22}\text{NO}_3\text{FSNa}$  ( $\text{M}+\text{Na}$ ) $^+$ : 422.1197, Found: 422.1192.

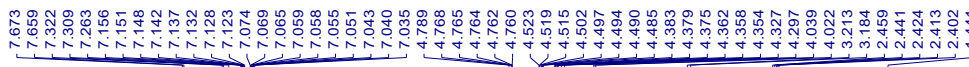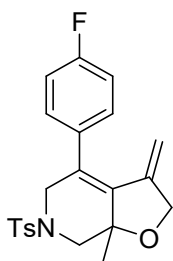

$^1\text{H}$  NMR ( $\text{CDCl}_3$ , 400 MHz, TMS)

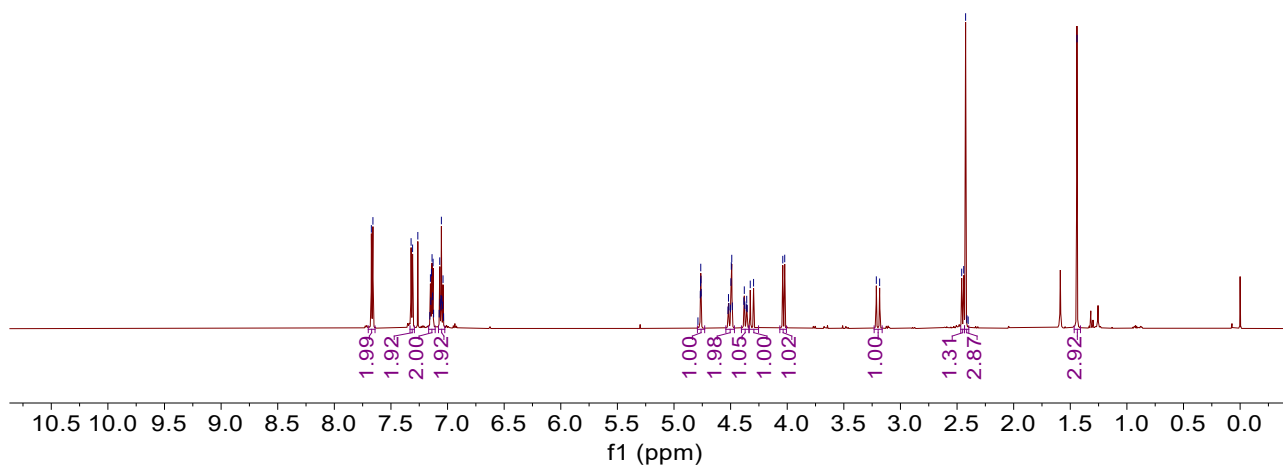

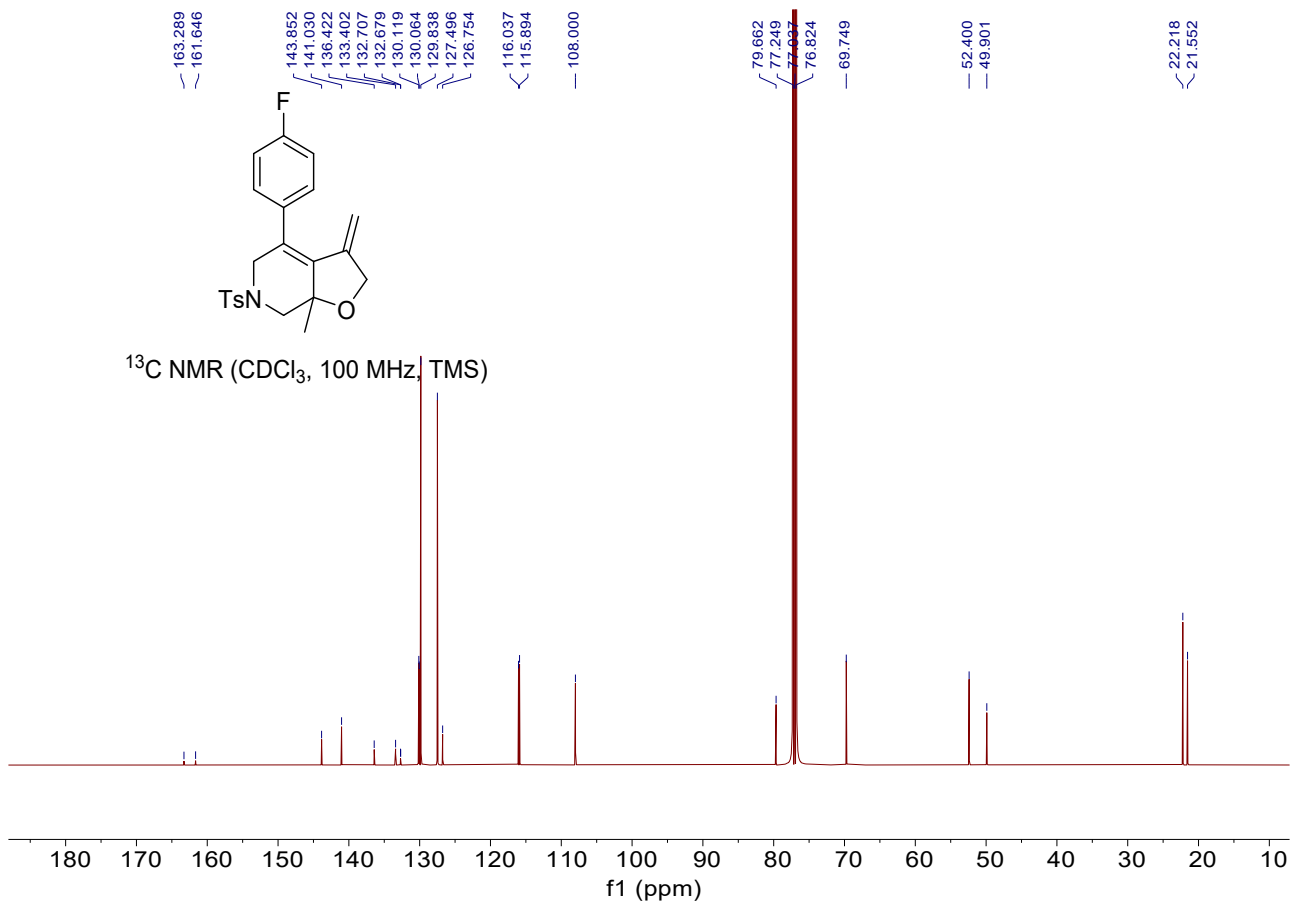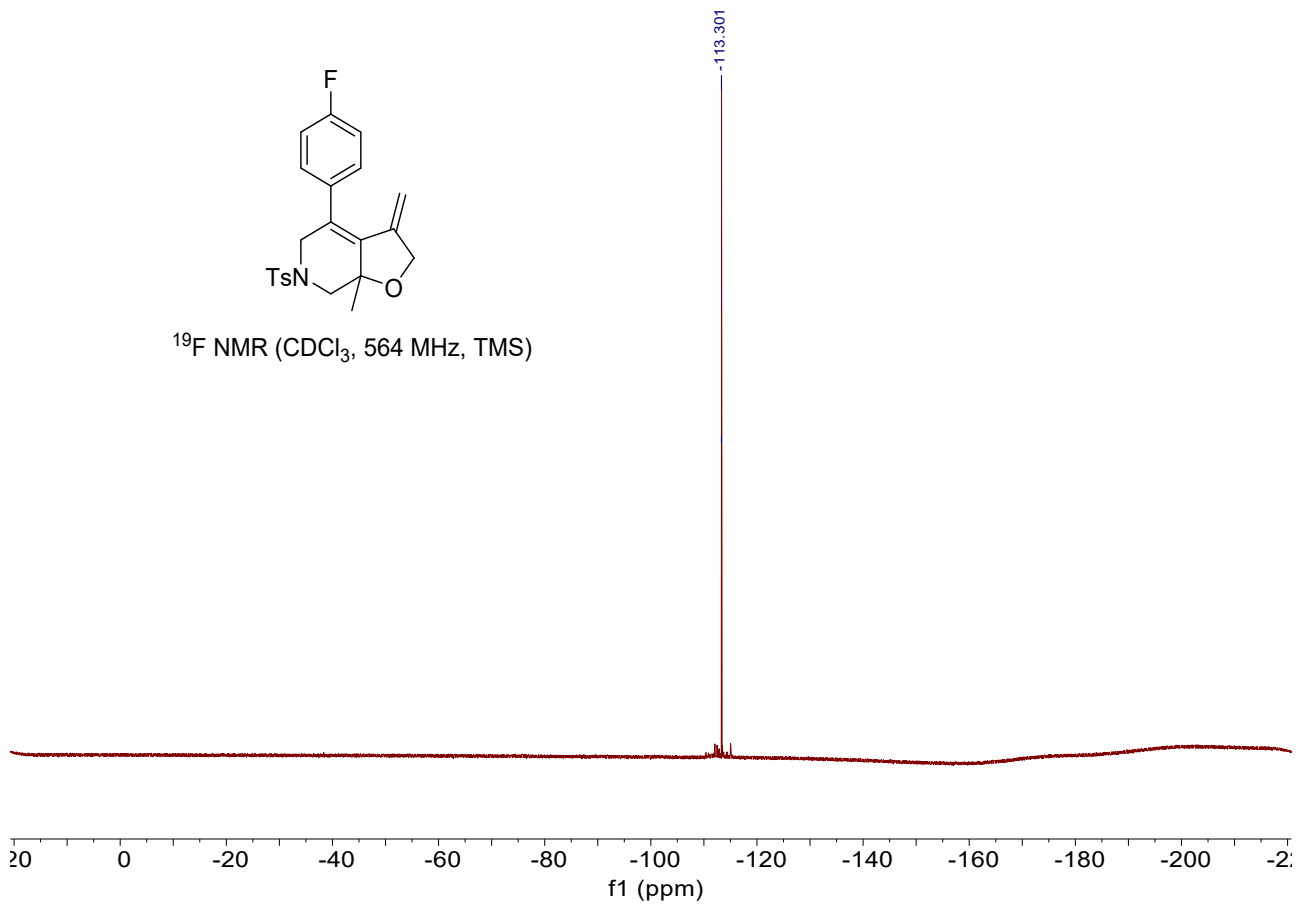

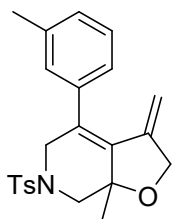

**7a-methyl-3-methylene-4-(m-tolyl)-6-tosyl-2,3,5,6,7,7a-hexahydrofuro[2,3-c]pyridine (3l)**

A colorless oil, 70% yield, 27.6 mg.  $^1\text{H}$  NMR ( $\text{CDCl}_3$ , TMS, 600 MHz)  $\delta$  7.66 (d,  $J = 8.4$  Hz, 2H), 7.31 (d,  $J = 8.4$  Hz, 2H), 7.24 (t,  $J = 7.6$  Hz, 1H), 7.13 (d,  $J = 7.6$  Hz, 1H), 6.98 (s, 1H), 6.94 (d,  $J = 7.6$  Hz, 1H), 4.77 – 4.69 (m, 1H), 4.54 – 4.47 (m, 2H), 4.39 – 4.30 (m, 2H), 4.03 (d,  $J = 10.4$  Hz, 1H), 3.23 (d,  $J = 17.6$  Hz, 1H), 2.46 (d,  $J = 10.4$  Hz, 1H), 2.42 (s, 3H), 2.33 (s, 3H), 1.45 (s, 3H).  $^{13}\text{C}$  NMR ( $\text{CDCl}_3$ , TMS, 150 MHz)  $\delta$  143.8, 141.0, 138.6, 136.8, 135.6, 133.5, 129.8, 128.78, 128.75, 128.0, 127.5, 125.2, 107.7, 79.7, 69.8, 52.5, 50.0, 22.3, 21.5, 21.3. IR (neat)  $\nu$  667, 778, 1164, 1350, 1598, 2864, 2927, 2971  $\text{cm}^{-1}$ . HRMS (ESI) calcd. for  $\text{C}_{23}\text{H}_{25}\text{NO}_3\text{SNa}$  ( $\text{M}+\text{Na}$ ) $^+$ : 418.1447, Found: 418.1450.

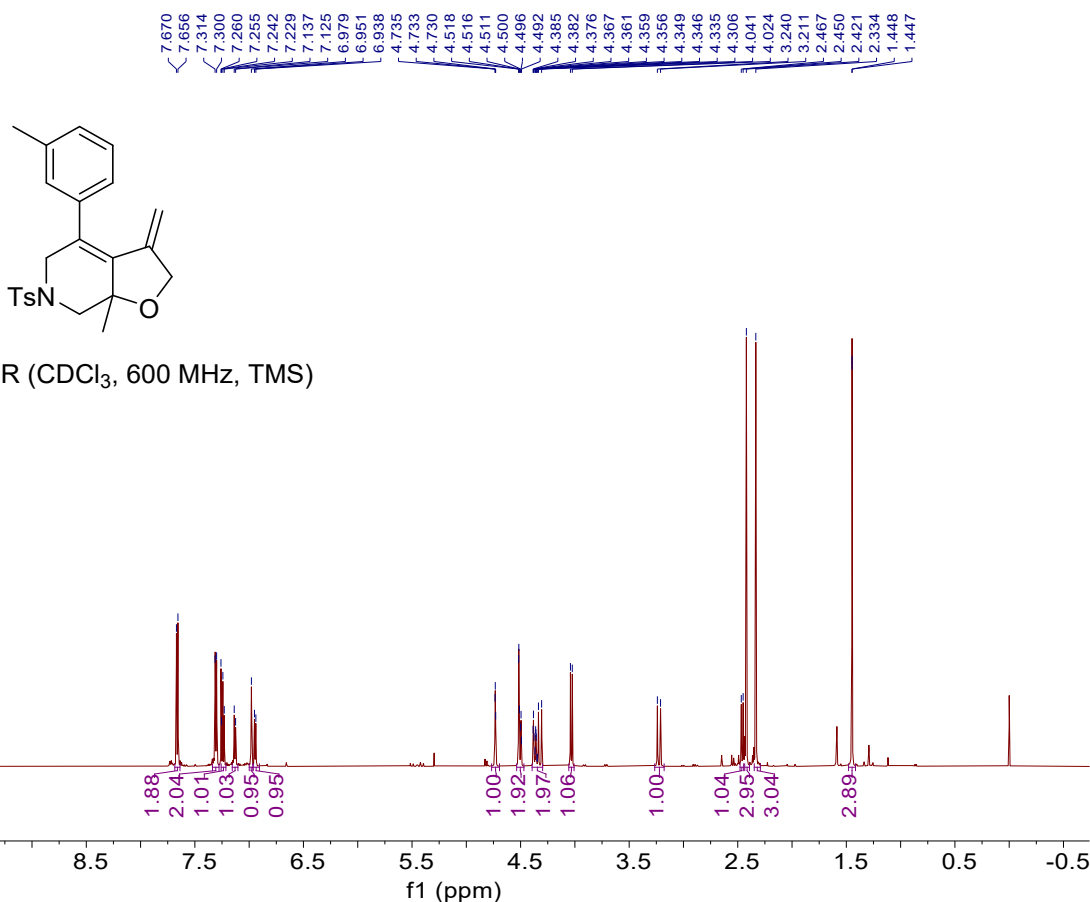

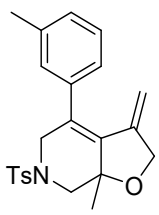

<sup>13</sup>C NMR (CDCl<sub>3</sub>, 100 MHz, TMS)

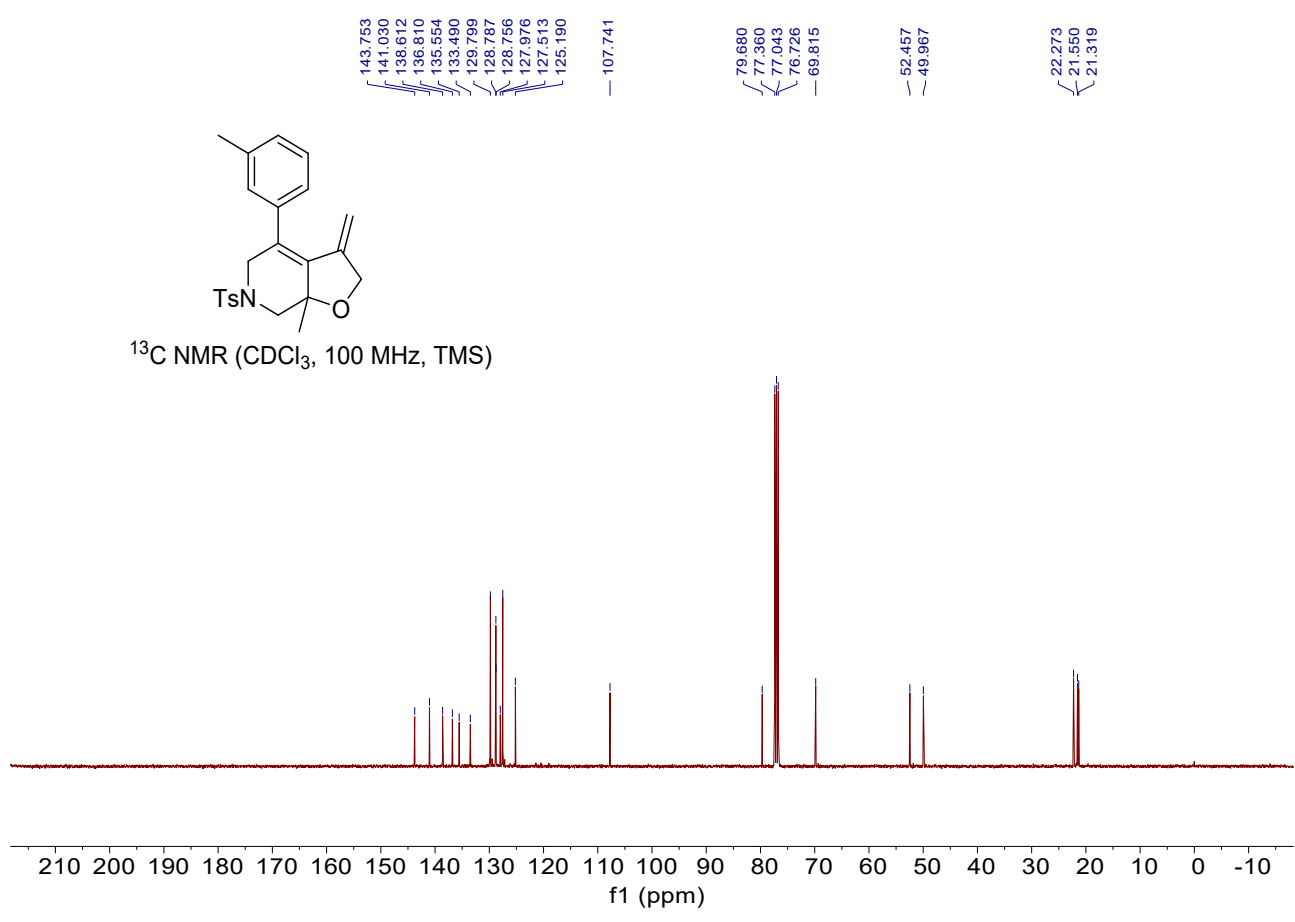



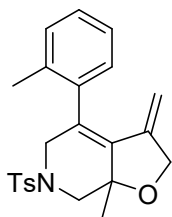

**7a-methyl-3-methylene-4-(o-tolyl)-6-tosyl-2,3,5,6,7,7a-hexahydrofuro[2,3-c]pyridine (3m)**

A colorless oil, 68% yield, 27.4 mg.  $^1\text{H}$  NMR ( $\text{CDCl}_3$ , TMS, 600 MHz)  $\delta$  7.70 – 7.63 (m, 2H), 7.36 – 7.28 (m, 2H), 7.26 – 7.21 (m, 2H), 7.19 – 7.11 (m, 2H), 4.72 – 4.64 (m, 1H), 4.56 – 4.48 (m, 1H), 4.40 – 4.31 (m, 1H), 4.29 – 4.14 (m, 2H), 4.10 – 4.02 (m, 1H), 3.25 – 3.14 (m, 1H), 2.53 – 2.46 (m, 1H), 2.44 – 2.41 (m, 3H), 2.27 (s, 1.5 H), 1.90 (s, 1.5 H), 1.43 – 1.50 (m, 3H).  $^{13}\text{C}$  NMR ( $\text{CDCl}_3$ , TMS, 150 MHz)  $\delta$  143.78, 143.75, 141.5, 141.2, 136.9, 136.5, 136.0, 135.9, 135.7, 134.3, 133.5, 133.4, 130.7, 130.2, 129.80, 129.76, 129.1, 128.3, 128.2, 127.51, 127.47, 127.23, 127.17, 126.8, 126.7, 126.4, 107.1, 107.0, 79.9, 79.6, 69.9, 69.6, 52.6, 49.5, 49.1, 22.2, 22.0, 21.6, 18.68, 18.65. IR (neat)  $\nu$  662, 778, 815, 1167, 13506, 1598, 2866, 2927, 2971  $\text{cm}^{-1}$ . HRMS (ESI) calcd. for  $\text{C}_{23}\text{H}_{25}\text{NO}_3\text{SNa}$  ( $\text{M}+\text{Na}$ ) $^+$ : 418.1447, Found: 418.1454.

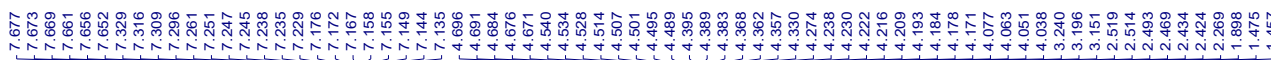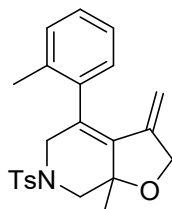

$^1\text{H}$  NMR ( $\text{CDCl}_3$ , 600 MHz, TMS)

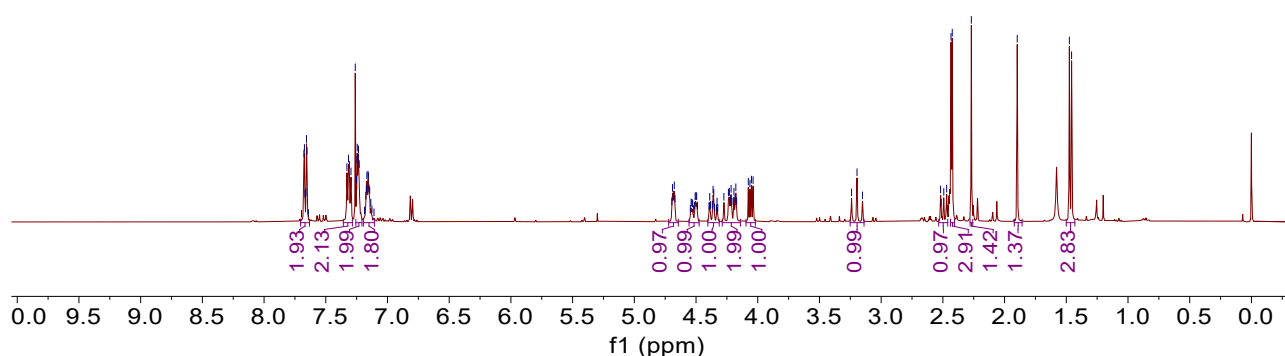

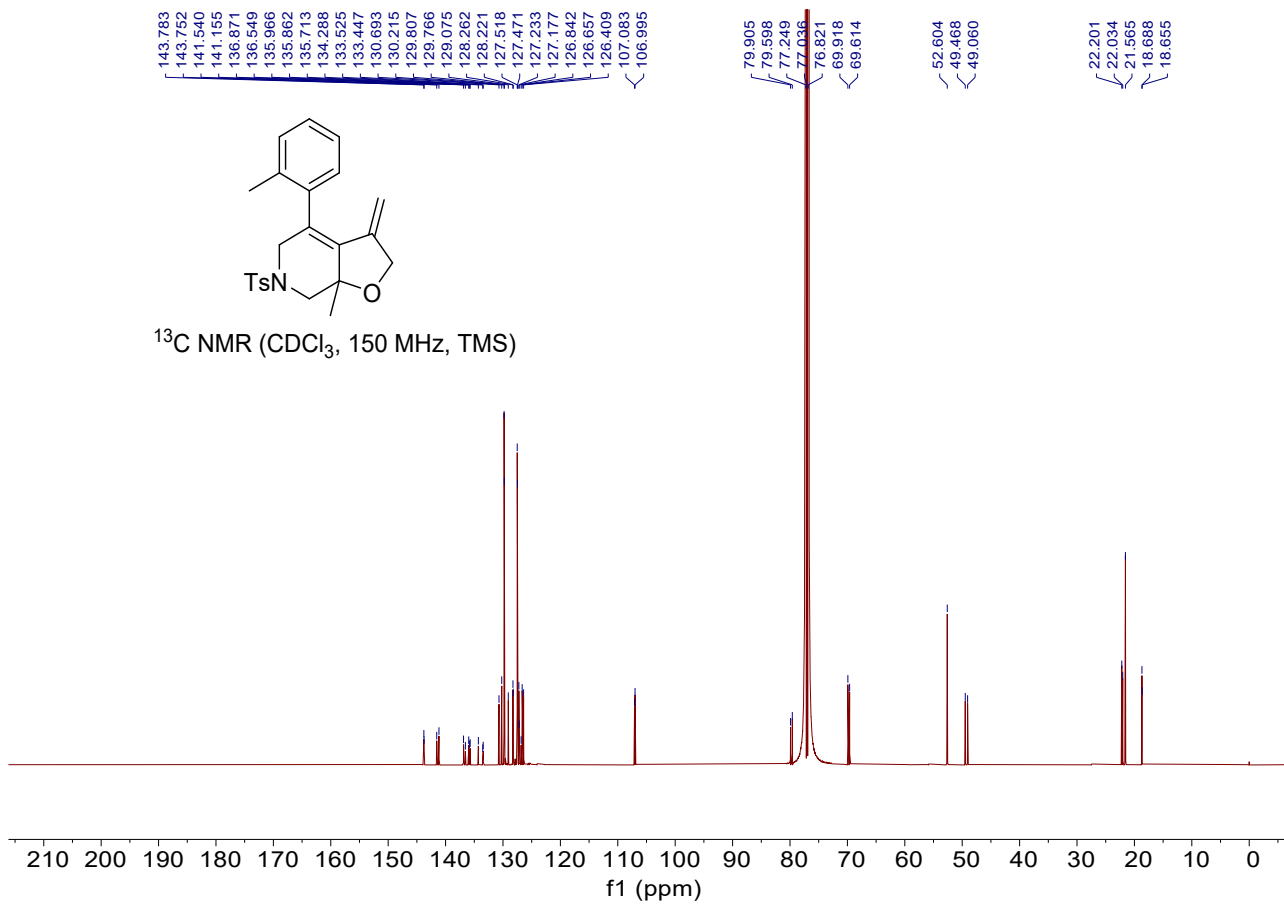

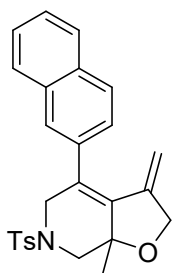

**7a-methyl-3-methylene-4-(naphthalen-2-yl)-6-tosyl-2,3,5,6,7,7a-hexahydrofuro[2,3-c]pyridine (3n)**

A colorless oil, 68% yield, 27.4 mg.  $^1\text{H}$  NMR ( $\text{CDCl}_3$ , TMS, 400 MHz)  $\delta$  7.88 – 7.76 (m, 4H), 7.70 – 7.64 (m, 3H), 7.53 – 7.48 (m, 2H), 7.33 – 7.28 (m, 2H), 4.72 (d,  $J = 2.0$  Hz, 1H), 4.56 – 4.36 (m, 4H), 4.07 (d,  $J = 10.2$  Hz, 1H), 3.30 (d,  $J = 17.4$  Hz, 1H), 2.51 (d,  $J = 10.4$  Hz, 1H), 2.42 (s, 3H), 1.49 (s, 3H).  $^{13}\text{C}$  NMR ( $\text{CDCl}_3$ , TMS, 150 MHz)  $\delta$  143.8, 141.0, 136.2, 134.2, 133.43, 133.41, 132.8, 129.8, 128.6, 127.9, 127.8, 127.6, 127.5, 127.3, 126.5, 126.4, 126.2, 108.2, 79.8, 69.8, 52.5, 49.9, 22.3, 21.5. IR (neat)  $\nu$  660, 817, 1159, 1350, 1597, 2858, 2922  $\text{cm}^{-1}$ . HRMS (ESI) calcd. for  $\text{C}_{26}\text{H}_{25}\text{NO}_3\text{SNa}$  ( $\text{M}+\text{Na}$ ) $^+$ : 454.1447, Found: 454.1452.

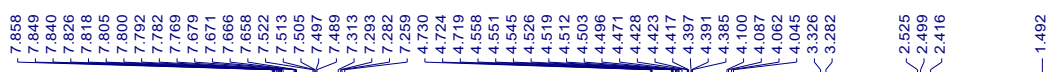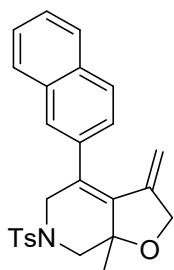

$^1\text{H}$  NMR ( $\text{CDCl}_3$ , 400 MHz, TMS)

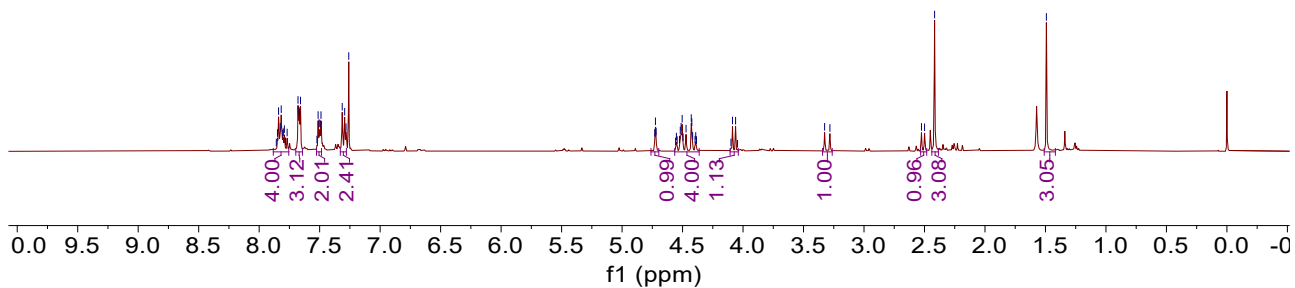

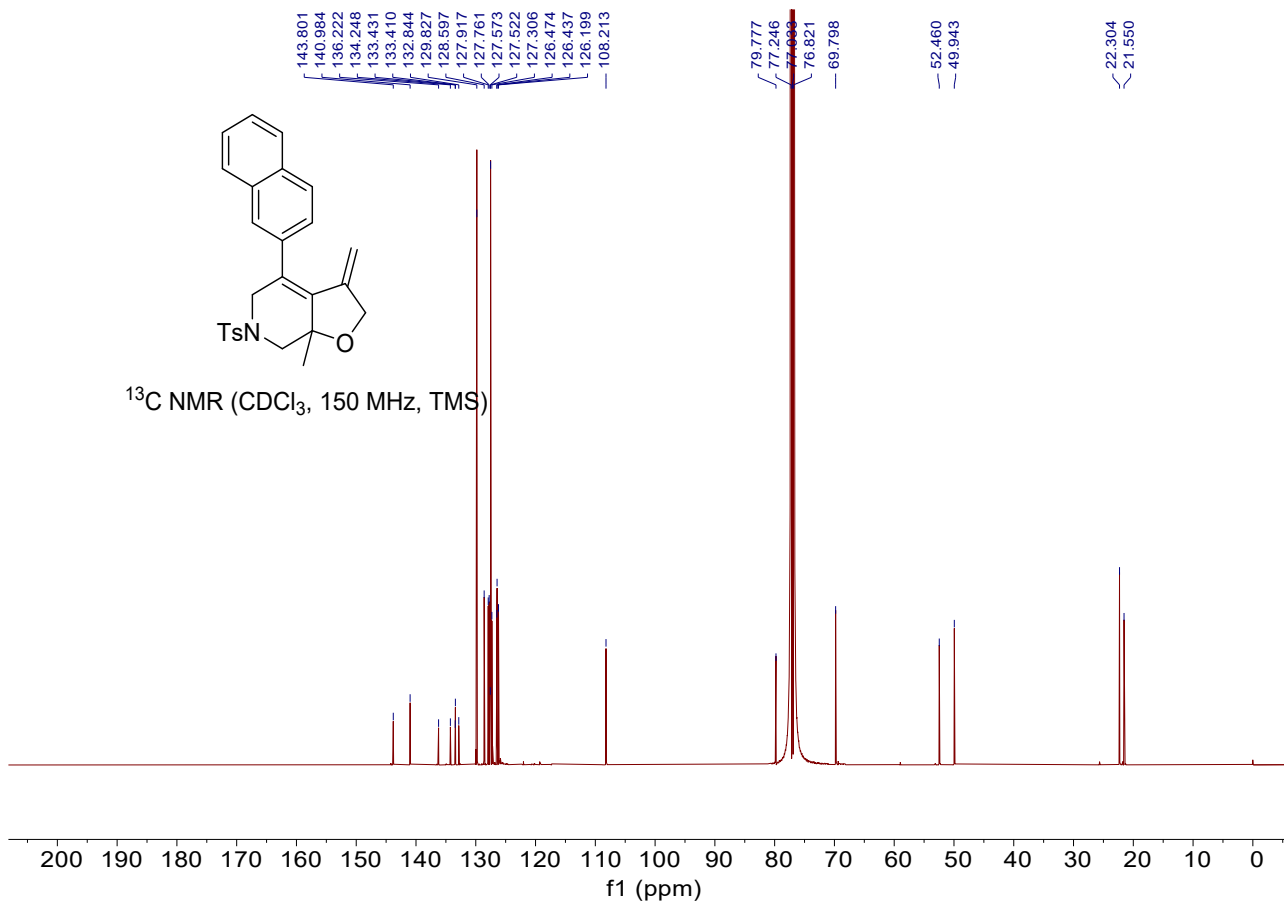

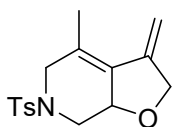

#### 4-methyl-3-methylene-6-tosyl-2,3,5,6,7,7a-hexahydrofuro[2,3-c]pyridine (3o)

A colorless oil, 72% yield, 21.9 mg.  $^1\text{H}$  NMR ( $\text{CDCl}_3$ , TMS, 400 MHz)  $\delta$  7.66 (d,  $J = 8.2$  Hz, 2H), 7.30 (d,  $J = 8.2$  Hz, 2H), 5.19 (s, 1H), 5.09 (s, 1H), 4.57 (d,  $J = 10.8$  Hz, 1H), 4.41 (dt,  $J = 12.0, 2.0$  Hz, 1H), 4.30 (dt,  $J = 12.0, 2.0$  Hz, 1H), 3.99 – 3.88 (m, 1H), 3.78 – 3.70 (m, 1H), 3.46 – 3.37 (m, 2H), 2.42 (s, 3H), 2.00 (s, 3H).  $^{13}\text{C}$  NMR ( $\text{CDCl}_3$ , TMS, 100 MHz)  $\delta$  145.2, 143.4, 137.0, 136.1, 130.5, 129.74, 129.69, 127.1, 107.5, 81.2, 72.5, 53.2, 46.4, 32.8, 21.5, 20.3. IR (neat)  $\nu$  668, 814, 1162, 1325, 1596, 2848, 2929, 2974  $\text{cm}^{-1}$ . HRMS (ESI) calcd. for  $\text{C}_{16}\text{H}_{19}\text{NO}_3\text{SNa}$  ( $\text{M}+\text{Na}$ ) $^+$ : 328.0978, Found: 328.0976.

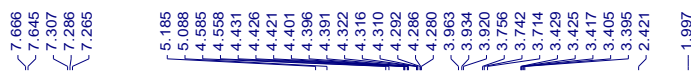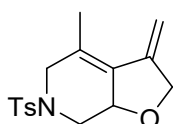

$^1\text{H}$  NMR ( $\text{CDCl}_3$ , 400 MHz, TMS)

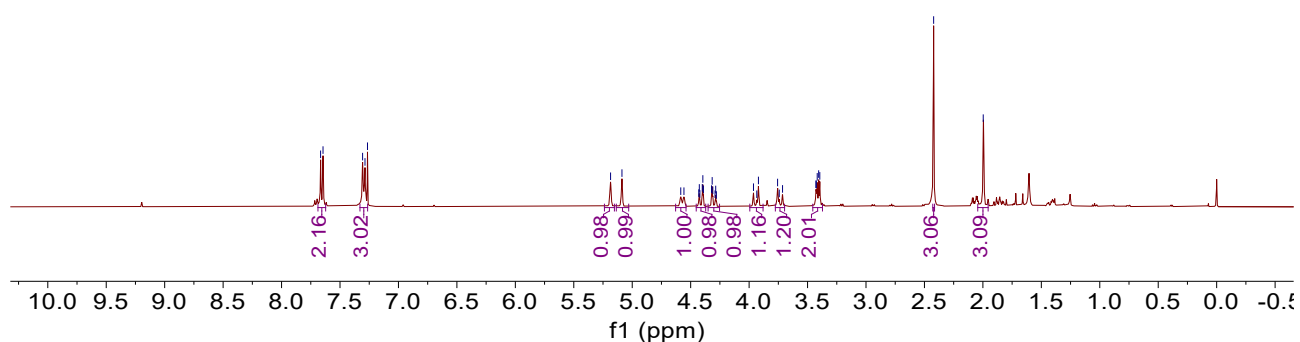

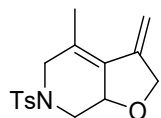

$^{13}\text{C}$  NMR ( $\text{CDCl}_3$ , 100 MHz, TMS)

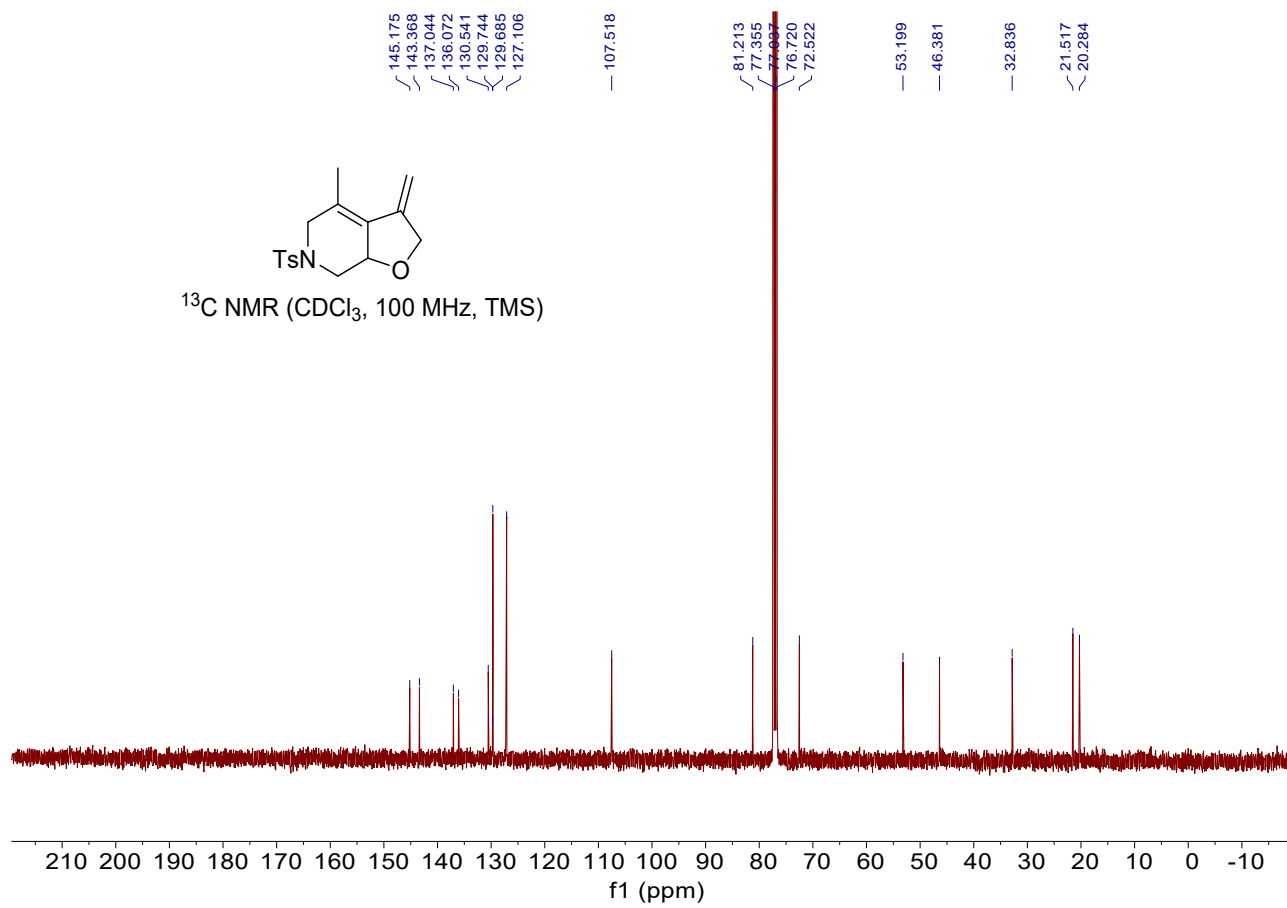

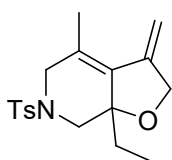

**7a-ethyl-4-methyl-3-methylene-6-tosyl-2,3,5,6,7a-hexahydrofuro[2,3-c]pyridine (3p)**

A colorless oil, 72% yield, 23.9 mg.  $^1\text{H}$  NMR ( $\text{CDCl}_3$ , TMS, 400 MHz)  $\delta$  7.69 (d,  $J = 8.4$  Hz, 2H), 7.33 (d,  $J = 8.4$  Hz, 2H), 5.18 (s, 1H), 5.09 (s, 1H), 4.44 (dt,  $J = 13.0, 2.4$  Hz, 1H), 4.34 (dt,  $J = 13.0, 2.4$  Hz, 1H), 4.15 – 4.05 (m, 2H), 3.02 (d,  $J = 17.2$  Hz, 1H), 2.43 (s, 3H), 2.14 (d,  $J = 11.8$  Hz, 1H), 1.80 (s, 3H), 1.74 – 1.63 (m, 1H), 1.58 – 1.49 (m, 1H), 0.96 (t,  $J = 7.6$  Hz, 3H).  $^{13}\text{C}$  NMR ( $\text{CDCl}_3$ , TMS, 100 MHz)  $\delta$  143.7, 143.1, 134.9, 133.3, 129.7, 127.5, 124.2, 107.2, 81.8, 70.0, 49.6, 48.6, 26.6, 21.5, 16.3, 7.4. IR (neat)  $\nu$  667, 817, 1166, 1345, 1596, 2868, 2929, 2964  $\text{cm}^{-1}$ . HRMS (ESI) calcd. for  $\text{C}_{18}\text{H}_{24}\text{NO}_3\text{S}$  ( $\text{M}+\text{H}$ ) $^+$ : 334.1471, Found: 334.1462.

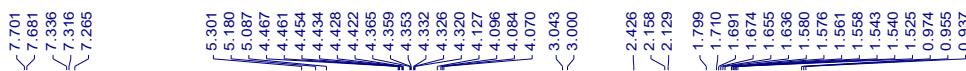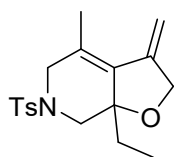

$^1\text{H}$  NMR ( $\text{CDCl}_3$ , 400 MHz, TMS)

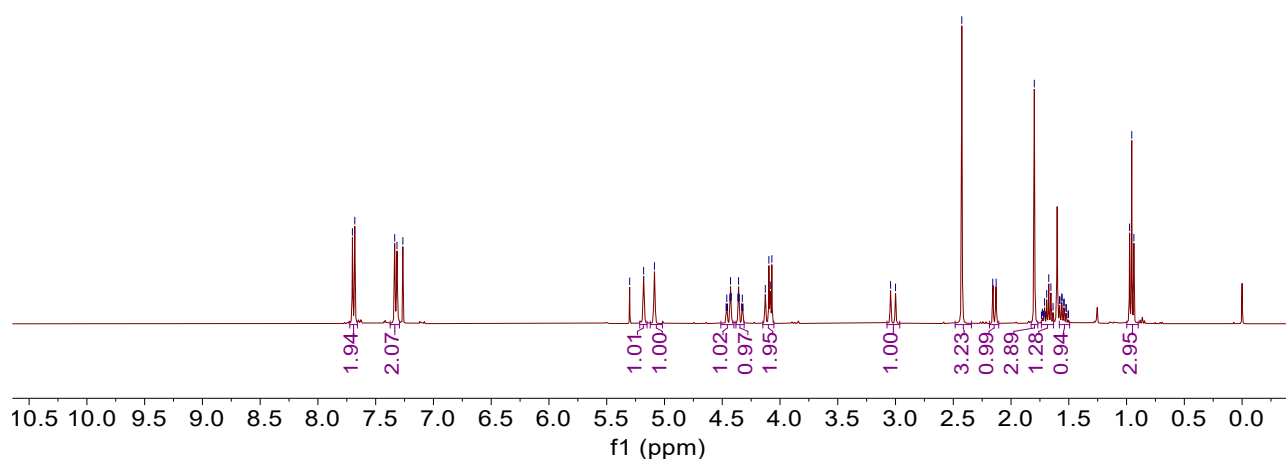

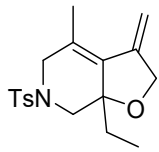

<sup>13</sup>C NMR (CDCl<sub>3</sub>, 100 MHz, TMS)

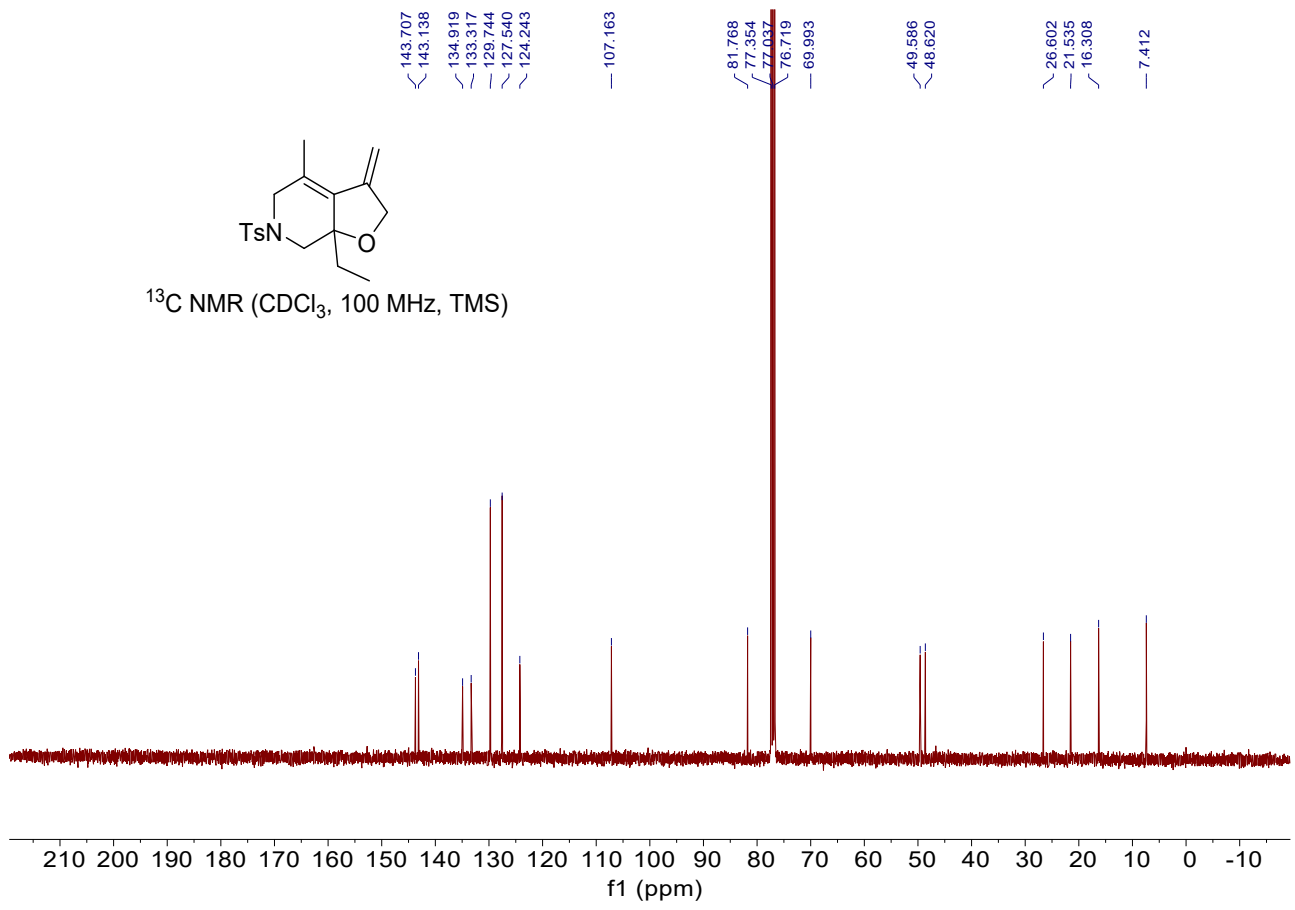



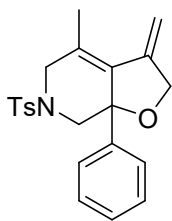

#### 4-methyl-3-methylene-7a-phenyl-6-tosyl-2,3,5,6,7,7a-hexahydrofuro[2,3-c]pyridine (3r)

A colorless oil, 50% yield, 19.1 mg.  $^1\text{H}$  NMR ( $\text{CDCl}_3$ , TMS, 400 MHz)  $\delta$  7.45 (d,  $J = 8.0$  Hz, 2H), 7.31 – 7.25 (m, 5H), 7.19 (d,  $J = 8.0$  Hz, 2H), 5.22 (s, 1H), 5.02 (s, 1H), 4.35 (dt,  $J = 12.8, 2.0$  Hz, 1H), 4.19 – 4.12 (m, 2H), 4.09 (d,  $J = 10.4$  Hz, 1H), 3.29 (d,  $J = 17.6$  Hz, 1H), 2.73 (d,  $J = 10.4$  Hz, 1H), 2.39 (s, 3H), 1.97 (s, 3H).  $^{13}\text{C}$  NMR ( $\text{CDCl}_3$ , TMS, 100 MHz)  $\delta$  143.5, 142.9, 140.9, 133.8, 132.6, 129.6, 128.1, 127.7, 127.5, 126.7, 126.3, 107.3, 83.0, 69.9, 53.4, 49.5, 21.5, 16.4. IR (neat)  $\nu$  668, 814, 1163, 1328, 1585, 2848, 2919, 2974  $\text{cm}^{-1}$ . HRMS (ESI) calcd. for  $\text{C}_{22}\text{H}_{24}\text{NO}_3\text{S}$  ( $\text{M}+\text{H}$ ) $^+$ : 382.1471, Found: 382.1464.

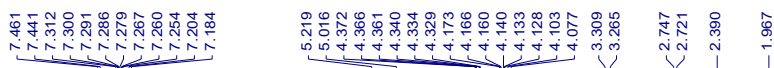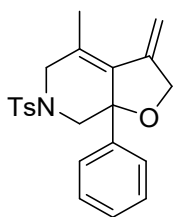

$^1\text{H}$  NMR ( $\text{CDCl}_3$ , 400 MHz, TMS)

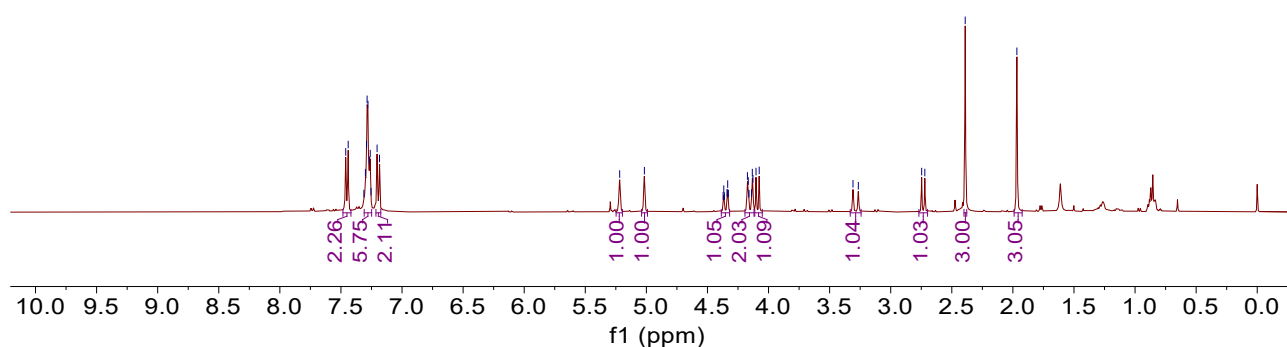

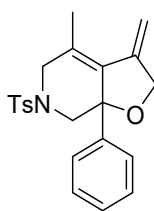

$^{13}\text{C}$  NMR ( $\text{CDCl}_3$ , 100 MHz, TMS)

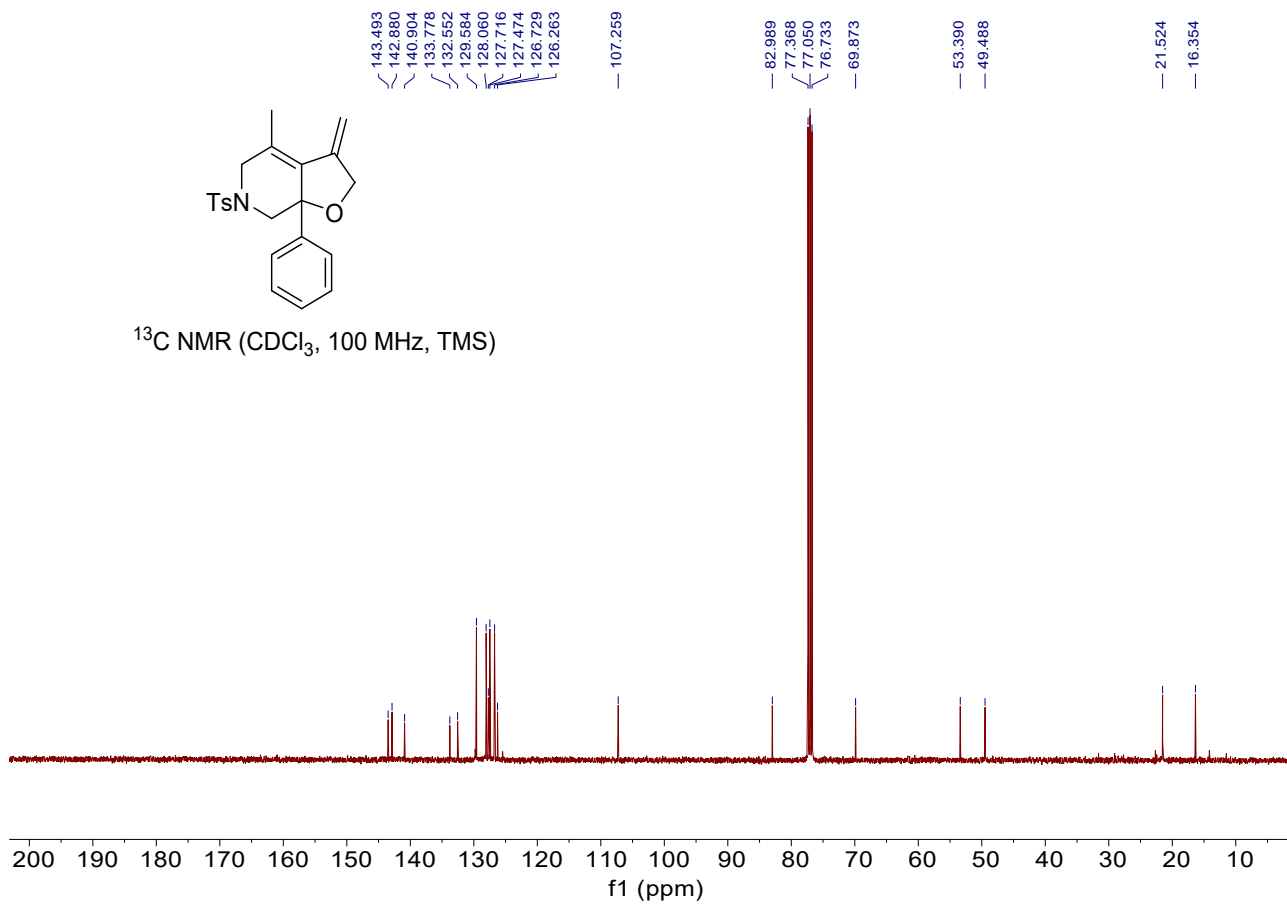

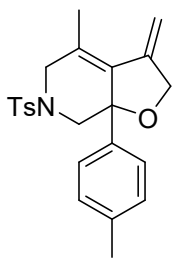

#### 4-methyl-3-methylene-7a-(p-tolyl)-6-tosyl-2,3,5,6,7,7a-hexahydrofuro[2,3-c]pyridine (3s)

A colorless oil, 48% yield, 19.0 mg.  $^1\text{H}$  NMR ( $\text{CDCl}_3$ , TMS, 400 MHz)  $\delta$  7.46 (d,  $J = 8.0$  Hz, 2H), 7.21 – 7.13 (m, 4H), 7.07 (d,  $J = 8.0$  Hz, 2H), 5.21 (s, 1H), 5.01 (s, 1H), 4.34 (dt,  $J = 12.8, 2.2$  Hz, 1H), 4.19 – 4.11 (m, 2H), 4.07 (d,  $J = 10.4$  Hz, 1H), 3.28 (d,  $J = 17.6$  Hz, 1H), 2.72 (d,  $J = 10.4$  Hz, 1H), 2.39 (s, 3H), 2.33 (s, 3H), 1.96 (s, 3H).  $^{13}\text{C}$  NMR ( $\text{CDCl}_3$ , TMS, 100 MHz)  $\delta$  143.4, 143.0, 137.9, 137.3, 133.9, 132.7, 129.5, 128.8, 127.5, 126.6, 126.1, 107.2, 82.9, 69.8, 53.4, 49.5, 21.5, 21.2, 16.3. IR (neat)  $\nu$  663, 814, 1165, 1328, 1595, 2849, 2939, 2974  $\text{cm}^{-1}$ . HRMS (ESI) calcd. for  $\text{C}_{22}\text{H}_{26}\text{NO}_3\text{S}$  ( $\text{M}+\text{H}$ ) $^+$ : 396.1628, Found: 396.1620.

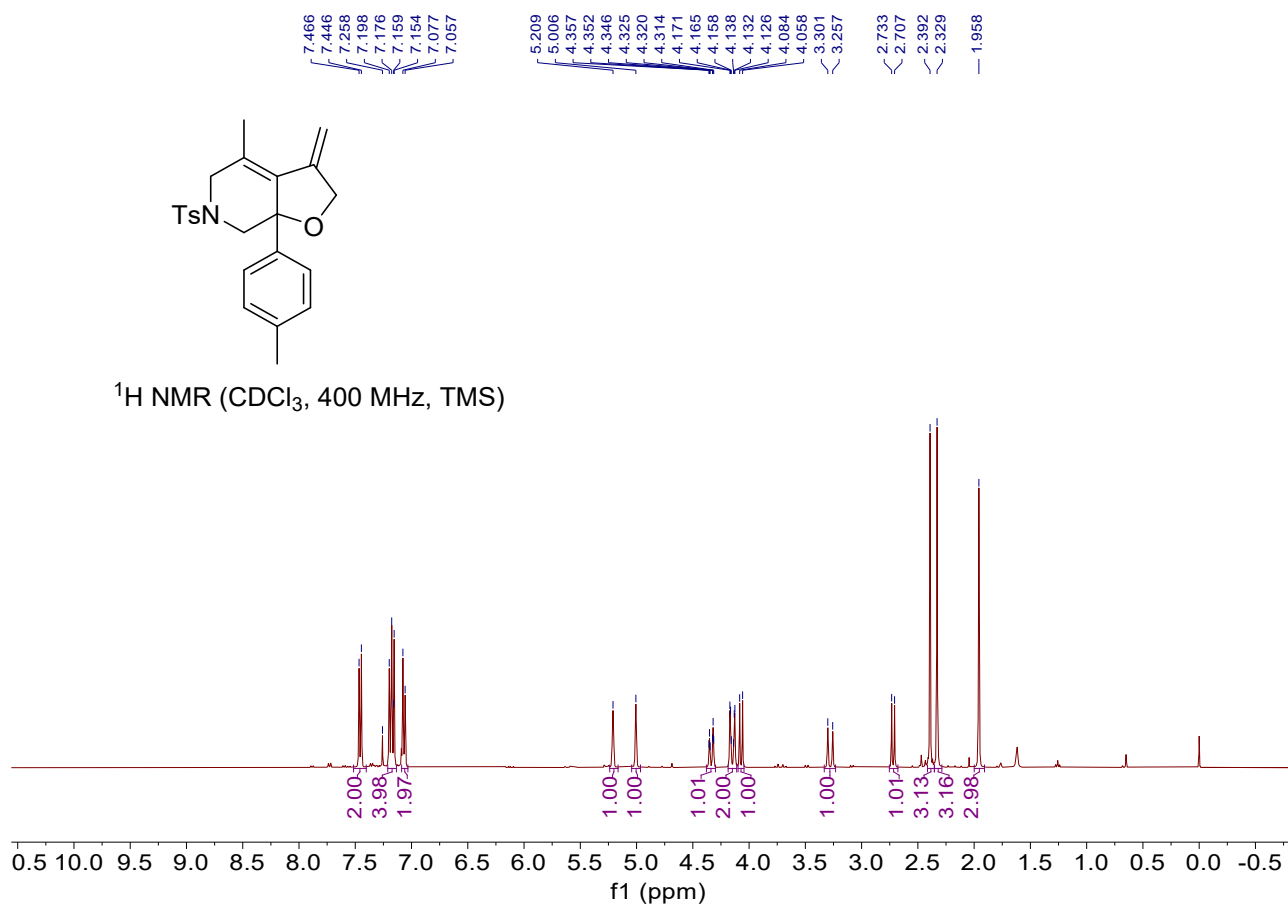

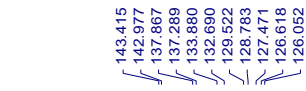

<sup>13</sup>C NMR (CDCl<sub>3</sub>, 100 MHz, TMS)

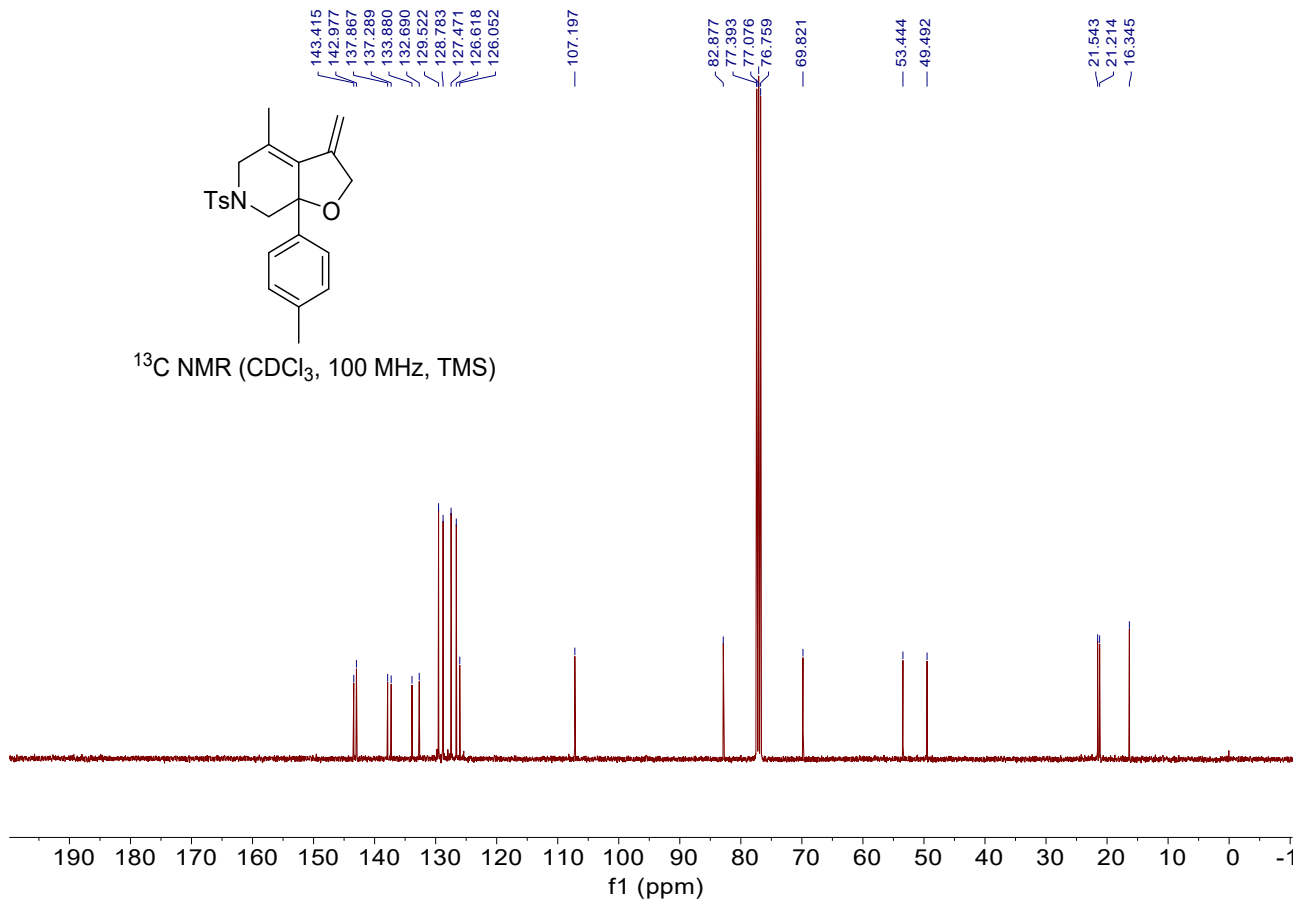

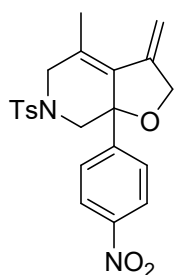

**4-methyl-3-methylene-7a-(4-nitrophenyl)-6-tosyl-2,3,5,6,7,7a-hexahydrofuro[2,3-c]pyridine (3t)**

A colorless oil, 62% yield, 26.4 mg.  $^1\text{H}$  NMR ( $\text{CDCl}_3$ , TMS, 400 MHz)  $\delta$  8.11 (d,  $J = 8.0$  Hz, 2H), 7.53 – 7.41 (m, 4H), 7.21 (d,  $J = 8.0$  Hz, 2H), 5.25 (s, 1H), 5.05 (s, 1H), 4.40 (dt,  $J = 13.2, 2.2$  Hz, 1H), 4.26 (d,  $J = 17.6$  Hz, 1H), 4.13 (dt,  $J = 13.2, 2.4$  Hz, 1H), 4.03 (d,  $J = 10.8$  Hz, 1H), 3.32 (d,  $J = 17.6$  Hz, 1H), 2.77 (d,  $J = 10.8$  Hz, 1H), 2.39 (s, 3H), 2.00 (s, 3H).  $^{13}\text{C}$  NMR ( $\text{CDCl}_3$ , TMS, 150 MHz)  $\delta$  148.7, 147.6, 143.9, 141.8, 133.8, 131.8, 129.7, 127.7, 127.4, 127.3, 123.3, 108.1, 82.6, 70.1, 53.2, 49.6, 21.5, 16.4. IR (neat)  $\nu$  668, 814, 1162, 1325, 1595, 2848, 2929, 2974  $\text{cm}^{-1}$ . HRMS (ESI) calcd. for  $\text{C}_{22}\text{H}_{22}\text{N}_2\text{O}_5\text{SNa}$  ( $\text{M}+\text{Na}$ ) $^+$ : 449.1142, Found: 449.1146.

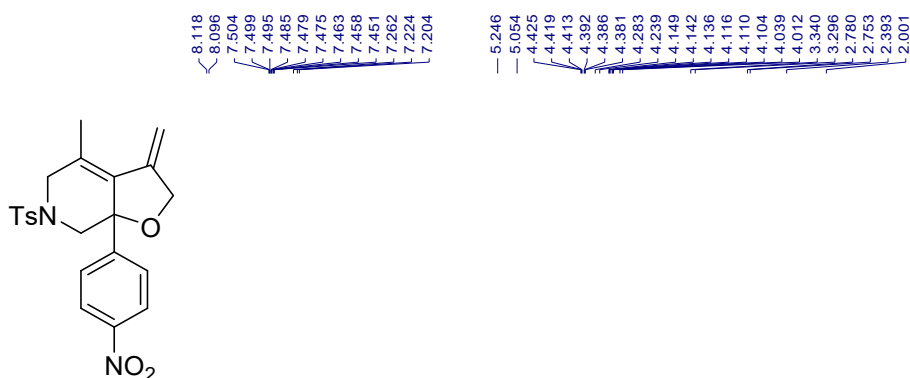

$^1\text{H}$  NMR ( $\text{CDCl}_3$ , 400 MHz, TMS)

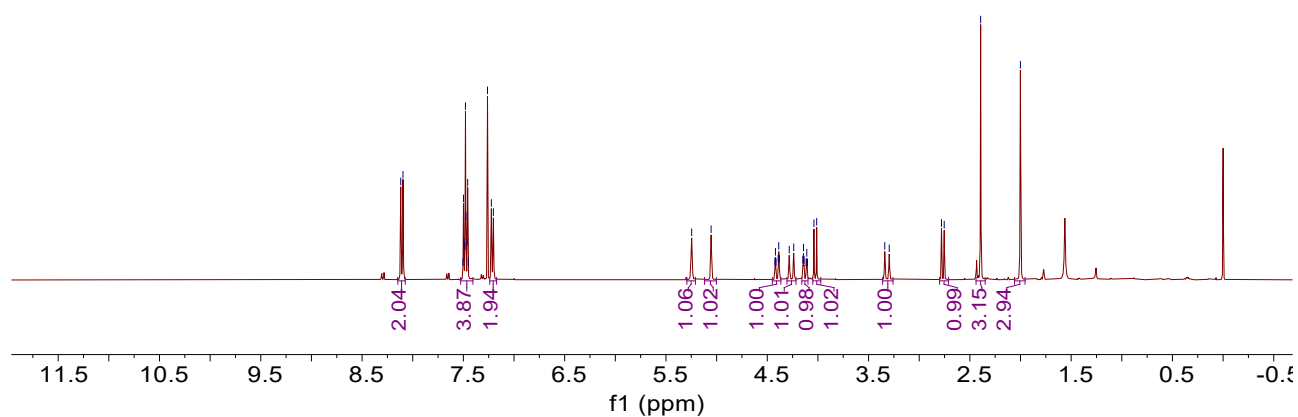

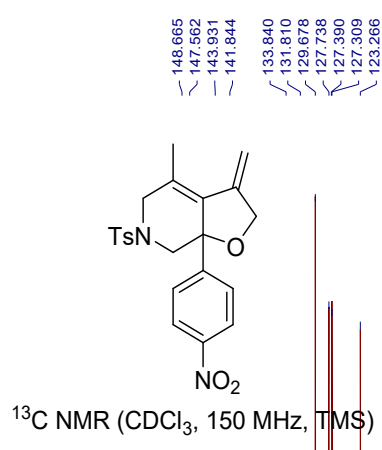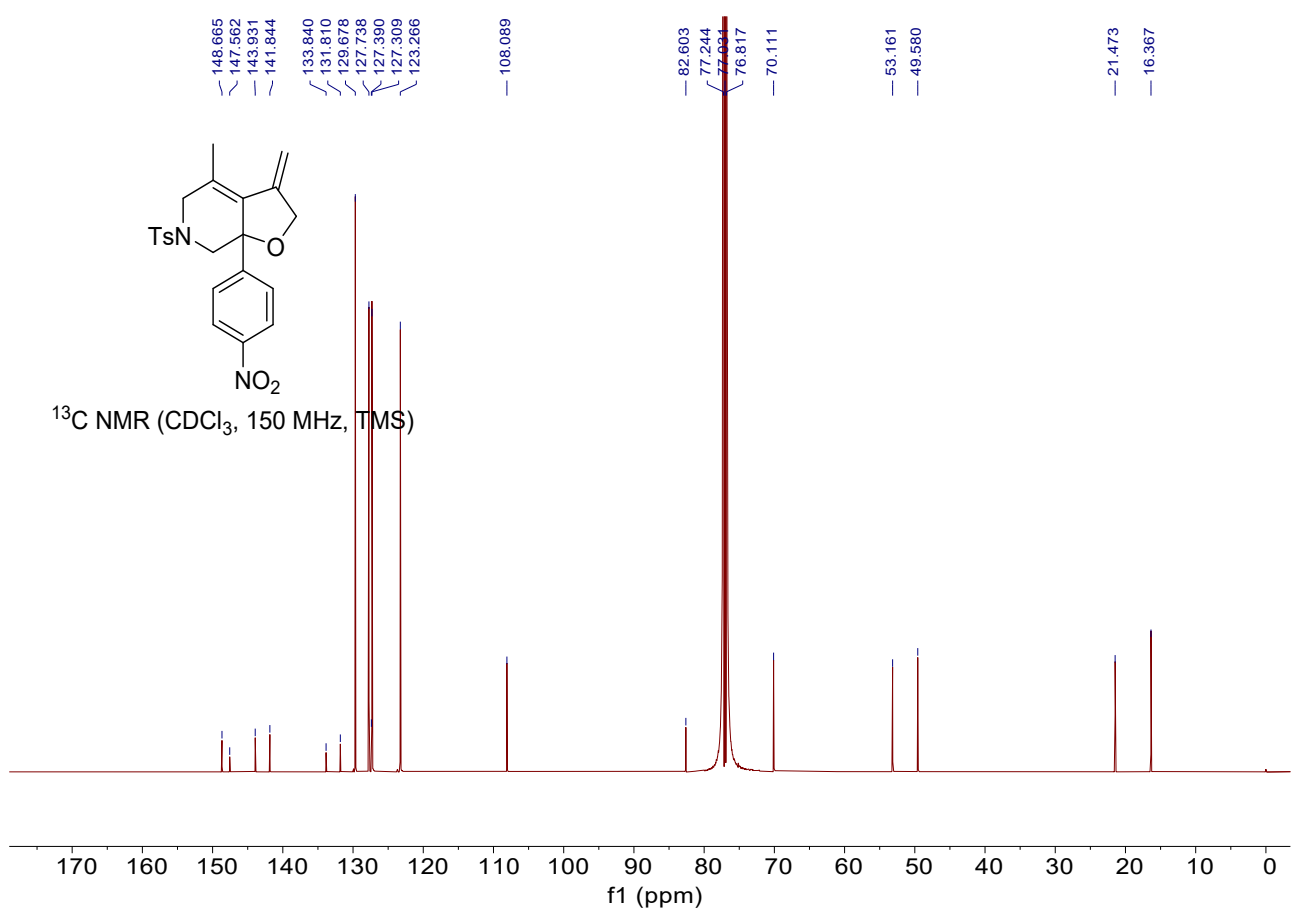

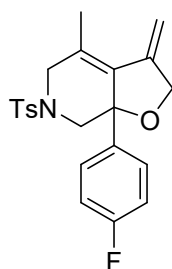

**7a-(4-fluorophenyl)-4-methyl-3-methylene-6-tosyl-2,3,5,6,7,7a-hexahydrofuro[2,3-c]pyridine (3u)**

A colorless oil, 58% yield, 23.2 mg.  $^1\text{H}$  NMR ( $\text{CDCl}_3$ , TMS, 400 MHz)  $\delta$  7.47 (d,  $J = 8.4$  Hz, 2H), 7.26 – 7.17 (m, 4H), 6.97 – 6.90 (m, 2H), 5.22 (s, 1H), 5.03 (s, 1H), 4.35 (dt,  $J = 12.8, 2.0$  Hz, 1H), 4.21 – 4.10 (m, 2H), 4.03 (d,  $J = 10.4$  Hz, 1H), 3.30 (d,  $J = 17.6$  Hz, 1H), 2.73 (d,  $J = 10.4$  Hz, 1H), 2.40 (s, 3H), 1.97 (s, 3H).  $^{13}\text{C}$  NMR ( $\text{CDCl}_3$ , TMS, 100 MHz)  $\delta$  163.2 (d,  $J_{\text{C-F}} = 245.8$  Hz), 143.6, 142.7, 136.73, 136.71, 134.0, 132.5, 129.6, 128.5 (d,  $J_{\text{C-F}} = 8.3$  Hz), 127.4, 126.45, 126.43, 114.9 (d,  $J_{\text{C-F}} = 21.7$  Hz), 107.4, 82.6, 69.8, 53.4, 49.5, 21.5, 16.3.  $^{19}\text{F}$  NMR (564 MHz,  $\text{CDCl}_3$ )  $\delta$  -115.2. IR (neat)  $\nu$  667, 817, 1220, 1355, 1506, 2868, 2919, 2963  $\text{cm}^{-1}$ . HRMS (ESI) calcd. for  $\text{C}_{22}\text{H}_{22}\text{NO}_3\text{FSNa}$  ( $\text{M}+\text{Na}$ ) $^+$ : 422.1197, Found: 422.1192.

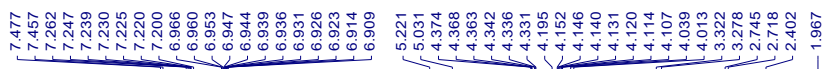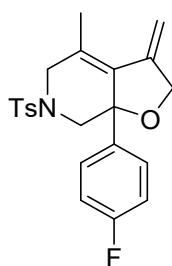

$^1\text{H}$  NMR ( $\text{CDCl}_3$ , 400 MHz, TMS)

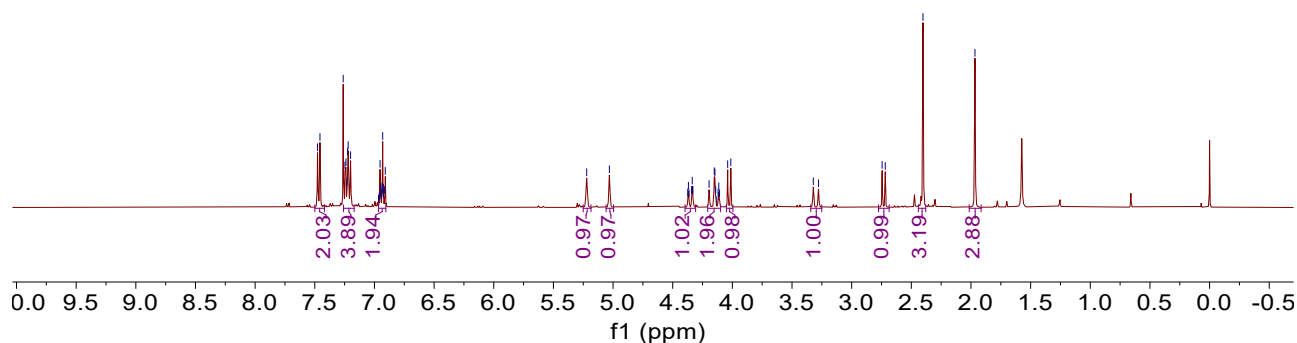

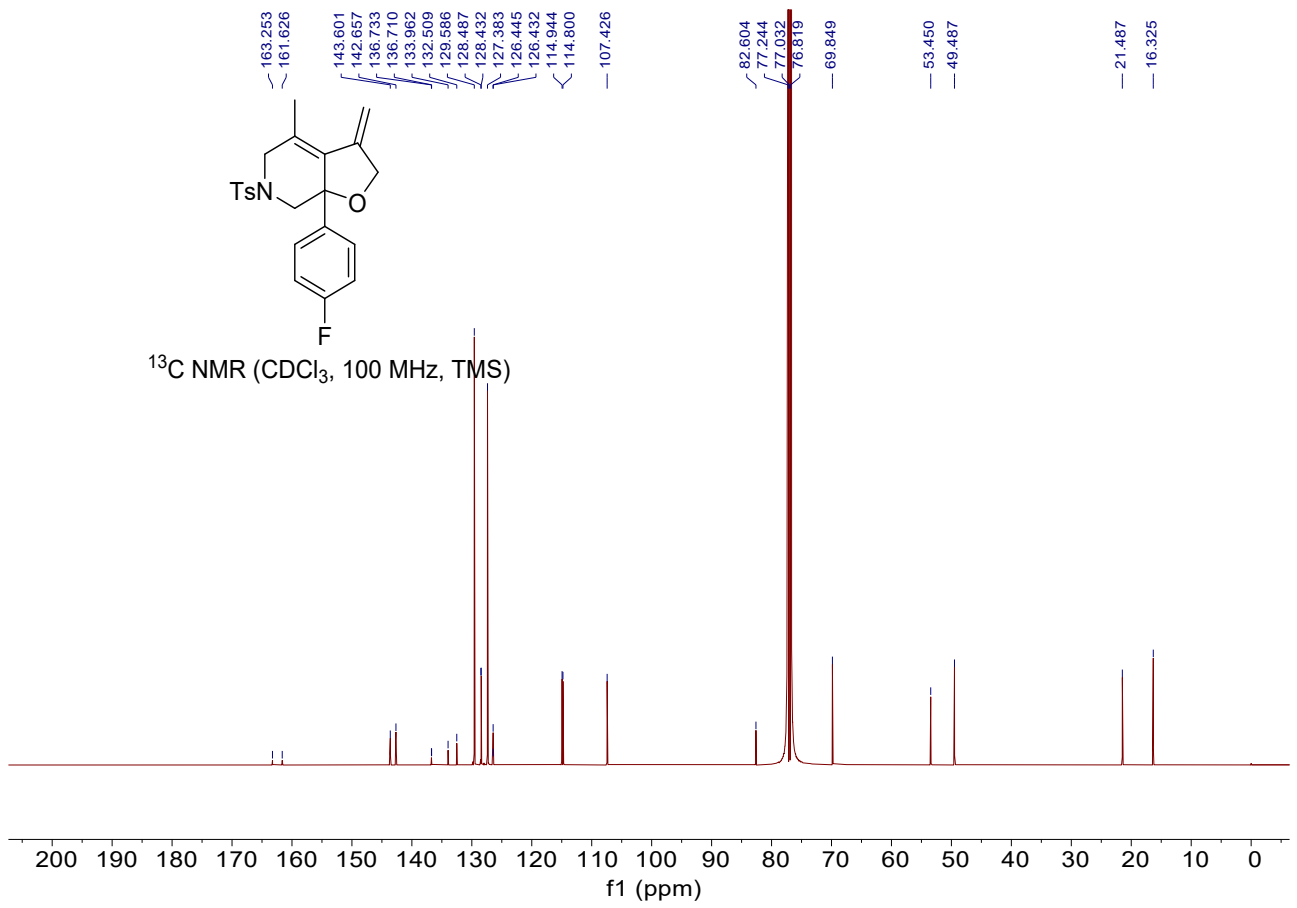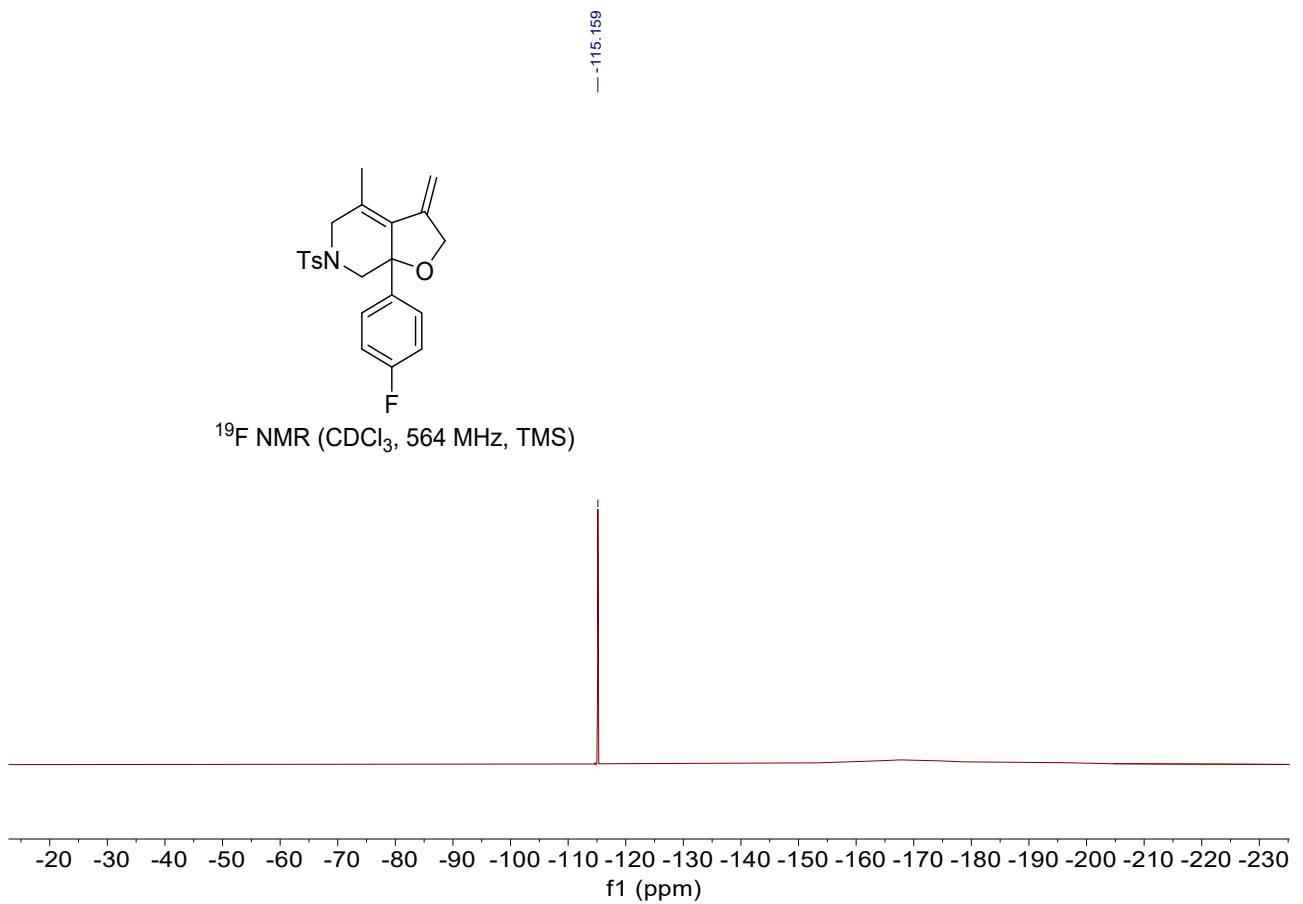



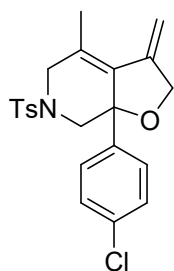

**7a-(4-chlorophenyl)-4-methyl-3-methylene-6-tosyl-2,3,5,6,7,7a-hexahydrofuro[2,3-c]pyridine (3v)**

A colorless oil, 60% yield, 26.2 mg.  $^1\text{H}$  NMR ( $\text{CDCl}_3$ , TMS, 400 MHz)  $\delta$  7.46 – 7.41 (m, 2H), 7.26 (s, 2H), 7.22 – 7.18 (m, 4H), 5.22 (s, 1H), 5.03 (s, 1H), 4.35 (dt,  $J = 12.8, 2.0$  Hz, 1H), 4.18 (d,  $J = 17.6$  Hz, 1H), 4.11 (dt,  $J = 12.8, 2.4$  Hz, 1H), 4.00 (d,  $J = 10.4$  Hz, 1H), 3.34 (d,  $J = 17.6$  Hz, 1H), 2.76 (d,  $J = 10.4$  Hz, 1H), 2.41 (s, 3H), 1.97 (s, 3H).  $^{13}\text{C}$  NMR ( $\text{CDCl}_3$ , TMS, 100 MHz)  $\delta$  143.6, 142.5, 134.0, 129.6, 128.19, 128.15, 127.3, 107.5, 82.6, 69.9, 53.3, 49.4, 21.5, 16.3. IR (neat)  $\nu$  663, 825, 1027, 1347, 1492, 1595, 2923, 2966  $\text{cm}^{-1}$ . HRMS (ESI) calcd. for  $\text{C}_{22}\text{H}_{22}\text{NO}_3\text{ClSNa}$  ( $\text{M}+\text{Na}$ ) $^+$ : 438.0901, Found: 438.0907.

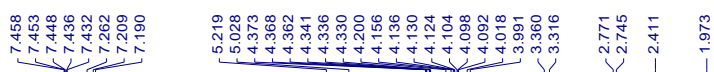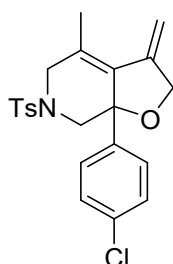

$^1\text{H}$  NMR ( $\text{CDCl}_3$ , 400 MHz, TMS)

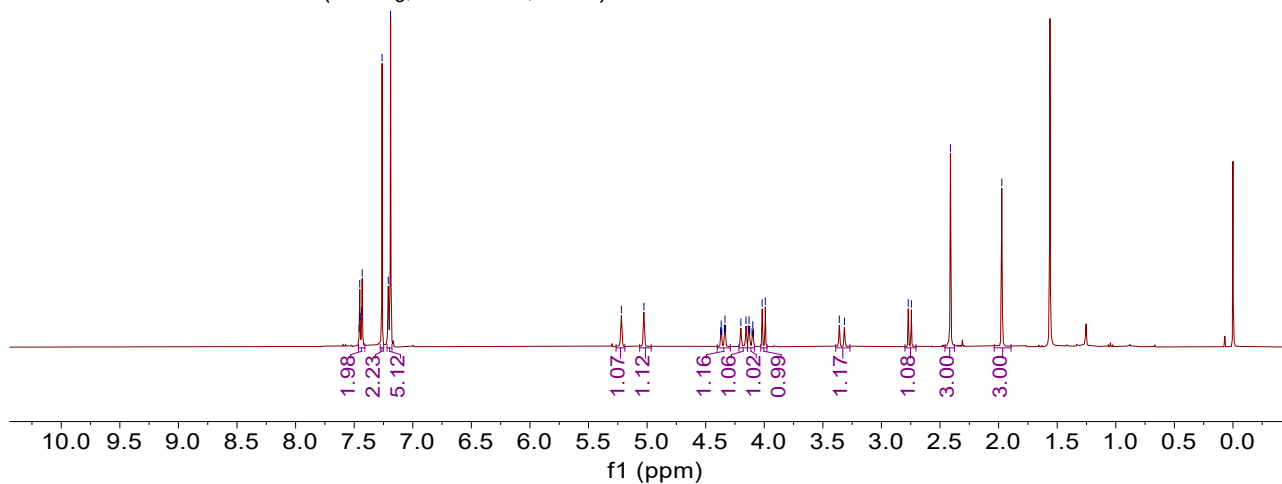

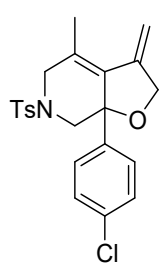

$^{13}\text{C}$  NMR ( $\text{CDCl}_3$ , 100 MHz, TMS)

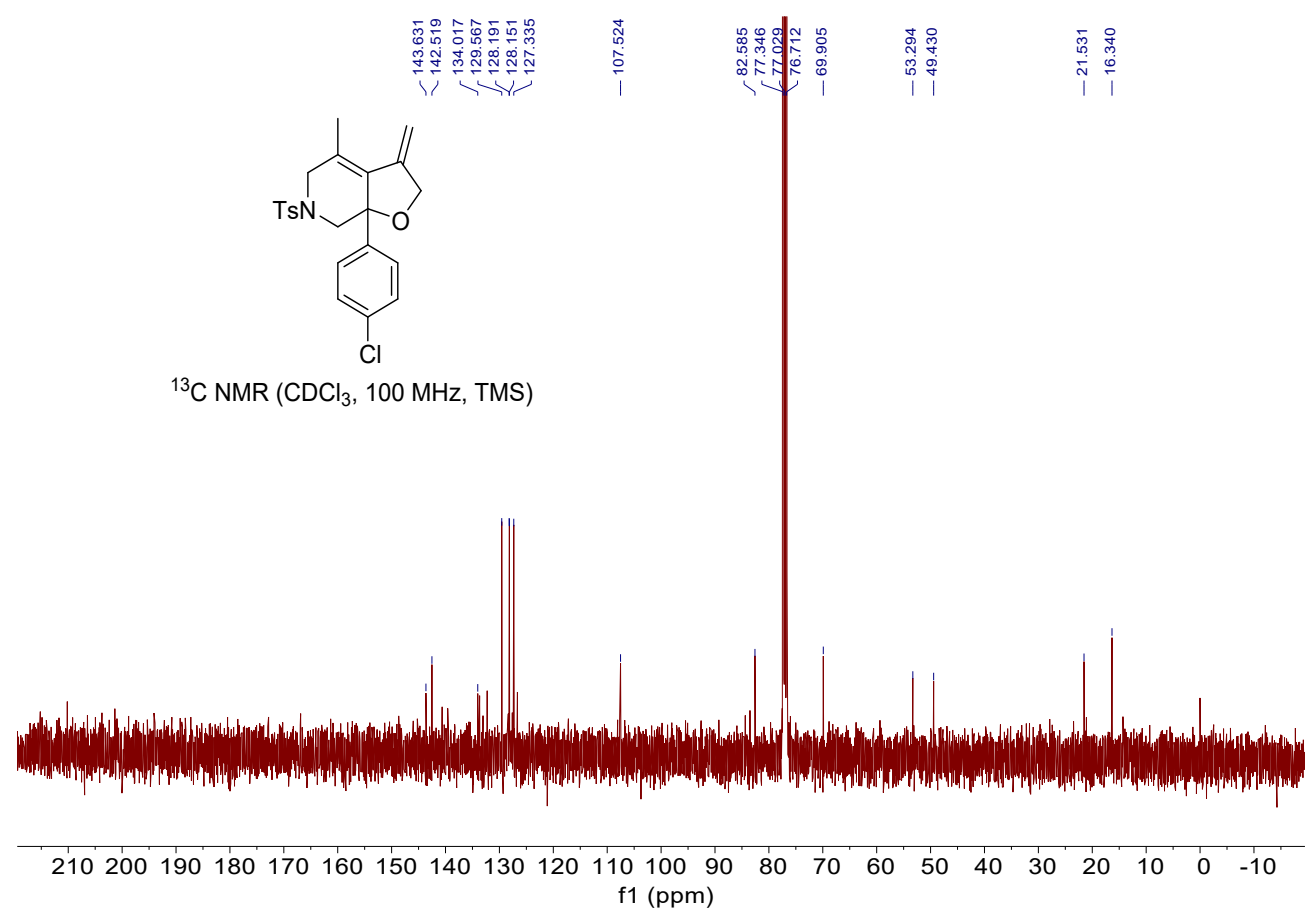

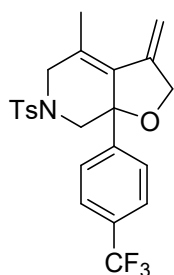

**4-methyl-3-methylene-6-tosyl-7a-(4-(trifluoromethyl)phenyl)-2,3,5,6,7,7a-hexahydrofuro[2,3-c]pyridine (3w)**

A colorless oil, 76% yield, 32.3 mg.  $^1\text{H}$  NMR ( $\text{CDCl}_3$ , TMS, 400 MHz)  $\delta$  7.49 (d,  $J = 8.2$  Hz, 2H), 7.43 (d,  $J = 8.2$  Hz, 2H), 7.38 (d,  $J = 8.2$  Hz, 2H), 7.18 (d,  $J = 8.2$  Hz, 2H), 5.23 (s, 1H), 5.04 (s, 1H), 4.38 (dt,  $J = 13.0, 2.2$  Hz, 1H), 4.21 (d,  $J = 17.6$  Hz, 1H), 4.11 (dt,  $J = 13.0, 2.4$  Hz, 1H), 4.02 (d,  $J = 10.8$  Hz, 1H), 3.36 (d,  $J = 17.6$  Hz, 1H), 2.79 (d,  $J = 10.8$  Hz, 1H), 2.38 (s, 3H), 1.99 (s, 3H).  $^{13}\text{C}$  NMR ( $\text{CDCl}_3$ , TMS, 100 MHz)  $\delta$  145.2, 143.7, 142.3, 133.8, 132.1, 129.8 (q,  $J_{\text{C-F}} = 32.6$  Hz), 129.0, 127.4, 127.1, 127.0, 126.7 (q,  $J_{\text{C-F}} = 272.9$  Hz), 125.0 (q,  $J_{\text{C-F}} = 4.0$  Hz), 107.7, 82.7, 70.0, 53.2, 49.4, 21.4, 16.4.  $^{19}\text{F}$  NMR (564 MHz,  $\text{CDCl}_3$ )  $\delta$  -62.4. IR (neat)  $\nu$  668, 814, 1162, 1325, 1595, 2848, 2929, 2974  $\text{cm}^{-1}$ . HRMS (ESI) calcd. for  $\text{C}_{23}\text{H}_{22}\text{NO}_3\text{F}_3\text{SNa}$  ( $\text{M}+\text{Na}$ ) $^+$ : 472.1165, Found: 472.1162.

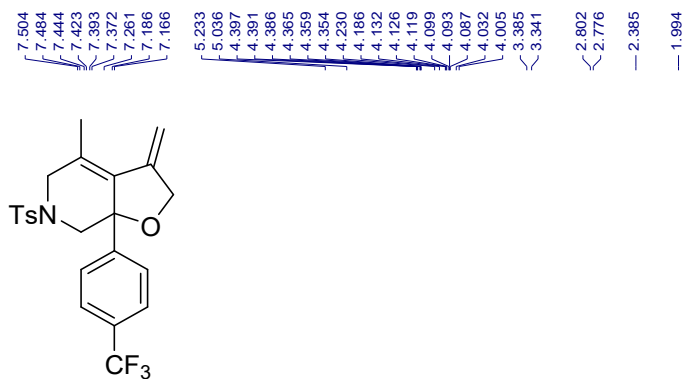

$^1\text{H}$  NMR ( $\text{CDCl}_3$ , 400 MHz, TMS)

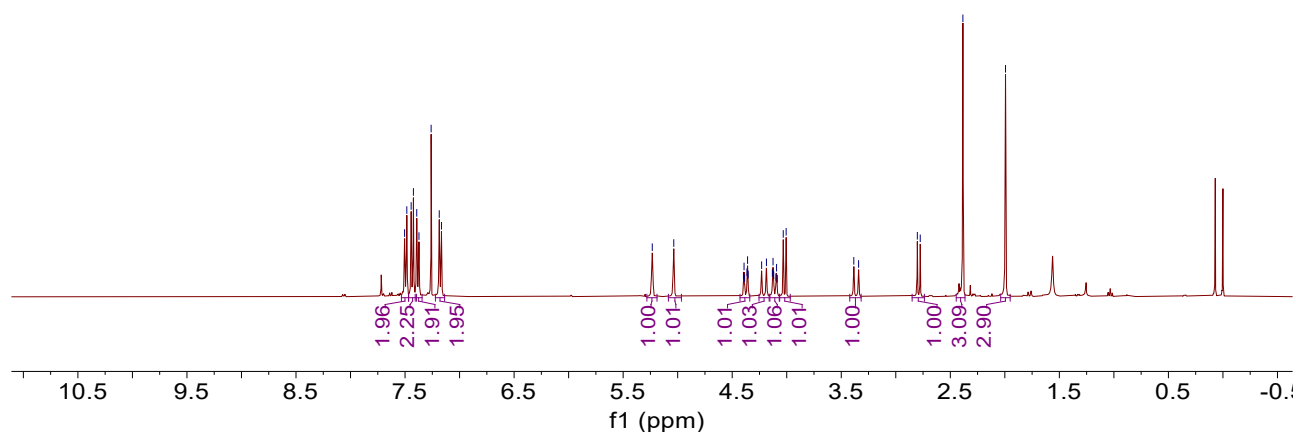

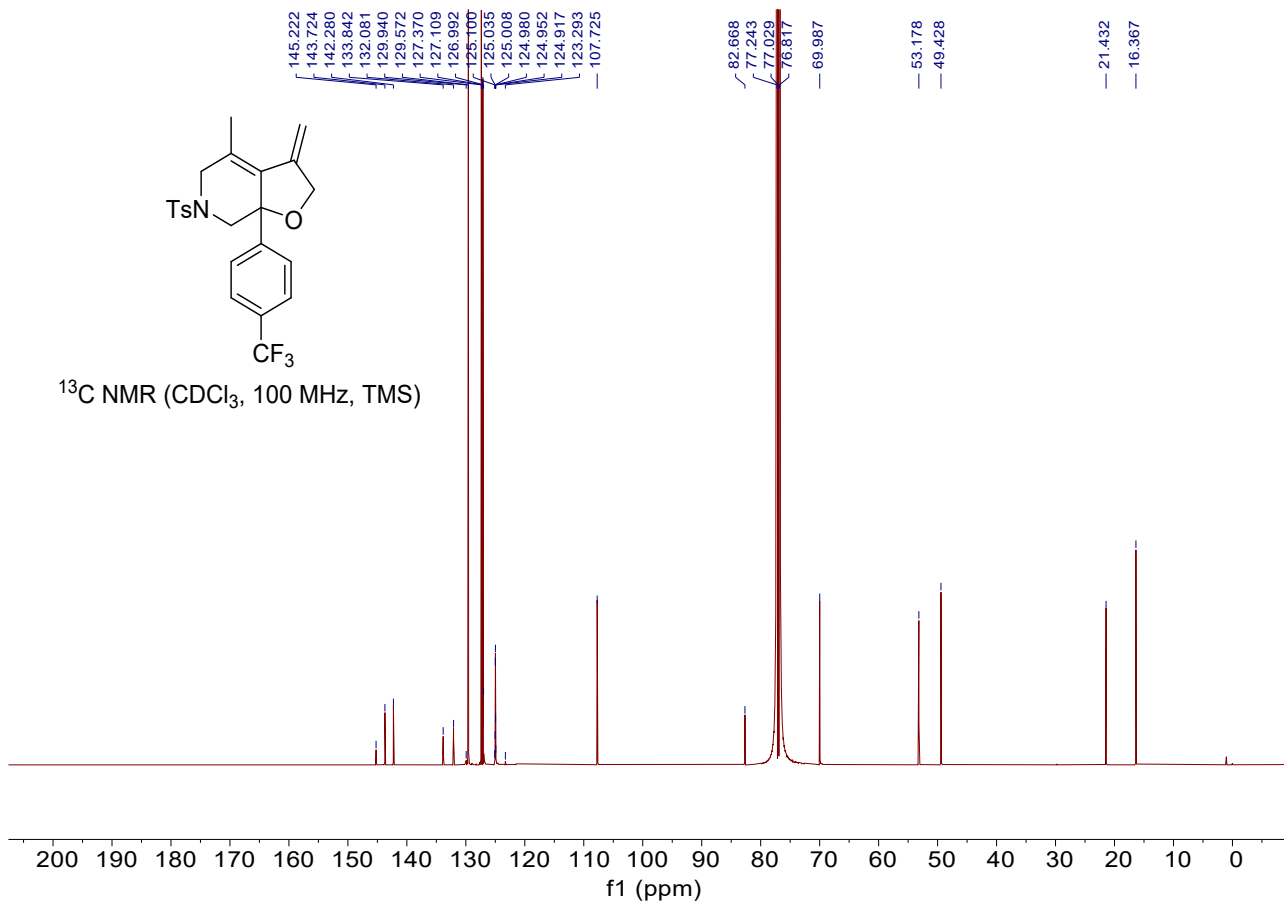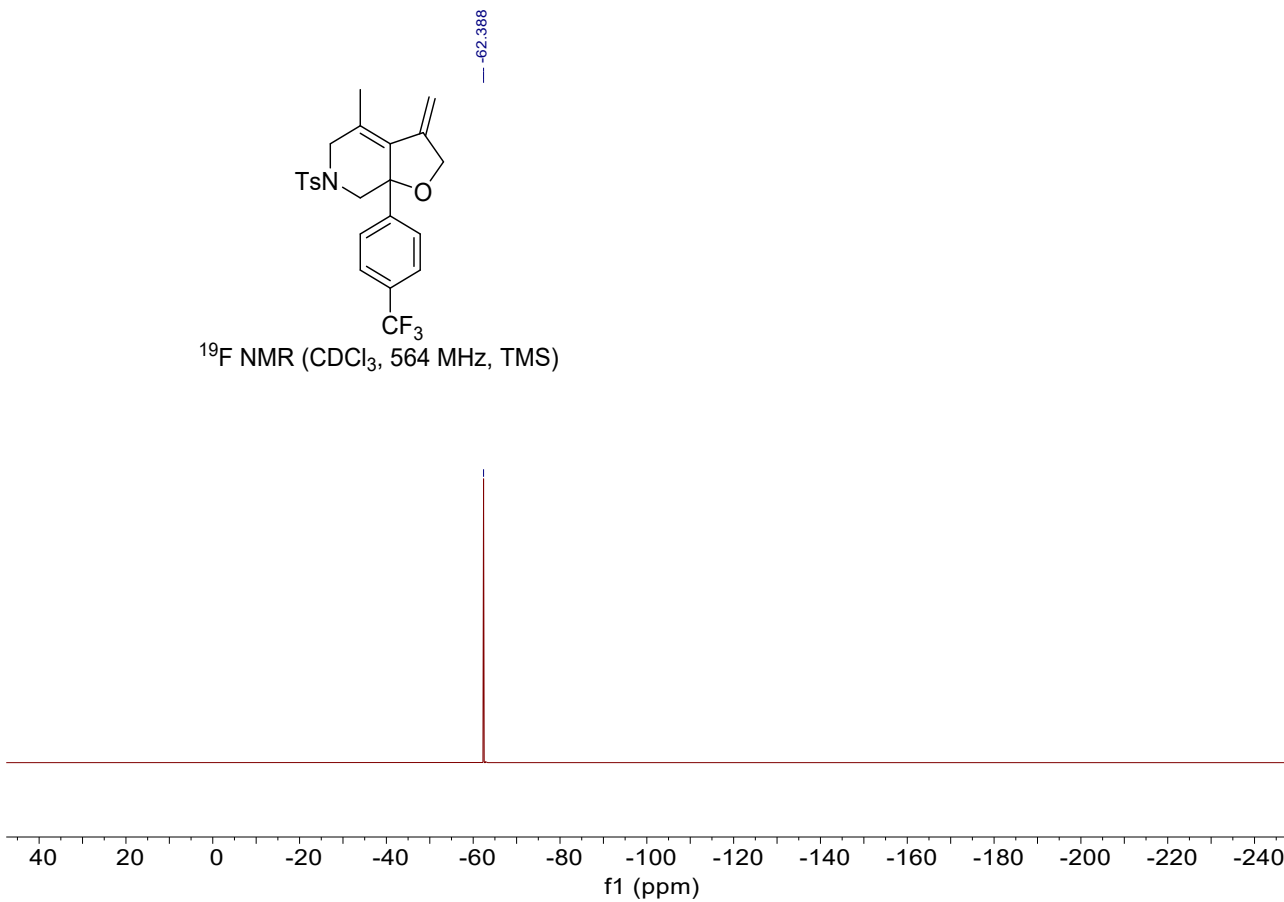

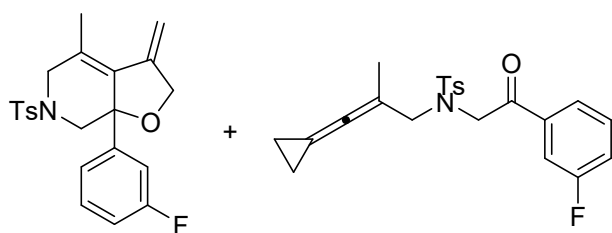

**7a-(3-fluorophenyl)-4-methyl-3-methylene-6-tosyl-2,3,5,6,7,7a-hexahydrofuro[2,3-c]pyridine (3y:1y = 1:2.8)**

A colorless oil, 26% yield, 10.4 mg.  $^1\text{H}$  NMR ( $\text{CDCl}_3$ , TMS, 600 MHz)  $\delta$  7.48 – 7.46 (m, 2H), 7.21 (d,  $J = 8.0$  Hz, 3H), 7.11 – 7.08 (m, 1H), 6.97 – 6.92 (m, 2H), 5.24 – 5.21 (m, 1H), 5.03 (d,  $J = 2.2$  Hz, 1H), 4.69 (s, 3H), 4.36 (dt,  $J = 12.9, 2.2$  Hz, 1H), 4.20 – 4.12 (m, 2H), 4.04 (d,  $J = 10.6$  Hz, 1H), 3.89 (s, 3H), 3.31 (d,  $J = 17.6$  Hz, 1H), 2.73 (d,  $J = 10.6$  Hz, 1H), 2.40 (s, 3H), 1.97 (s, 3H).  $^{13}\text{C}$  NMR ( $\text{CDCl}_3$ , TMS, 150 MHz)  $\delta$  193.0, 193.0, 189.4, 163.6, 163.4, 162.0, 161.8, 143.6, 143.4, 142.5, 137.3, 137.3, 136.8, 133.8, 132.2, 130.5, 130.4, 129.6, 129.6, 127.5, 127.4, 126.7, 123.8, 123.8, 122.5, 122.4, 120.6, 120.5, 114.9, 114.7, 114.7, 114.5, 114.0, 113.8, 107.5, 96.6, 82.6, 82.6, 70.0, 53.2, 52.7, 52.2, 49.4, 21.6, 21.5, 16.9, 16.3, 7.0.  $^{19}\text{F}$  NMR (564 MHz,  $\text{CDCl}_3$ )  $\delta$  -111.26, -111.29. IR (neat)  $\nu$  667, 817, 1220, 1355, 1506, 2868, 2919, 2963  $\text{cm}^{-1}$ . HRMS (ESI) calcd. for  $\text{C}_{22}\text{H}_{23}\text{NO}_3\text{FSN}$  (M+H) $^+$ : 400.1377, Found: 400.1367.

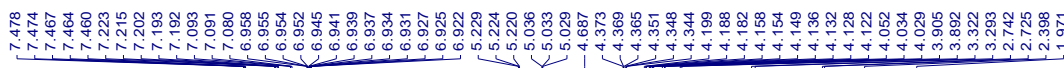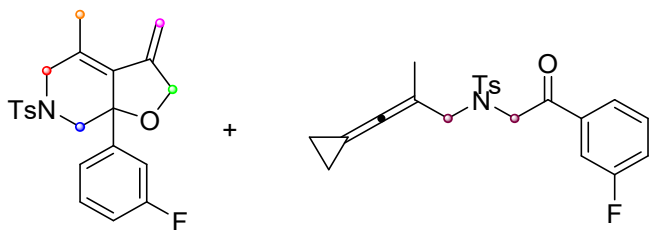

**1: 2.8**

$^1\text{H}$  NMR ( $\text{CDCl}_3$ , 600 MHz, TMS)

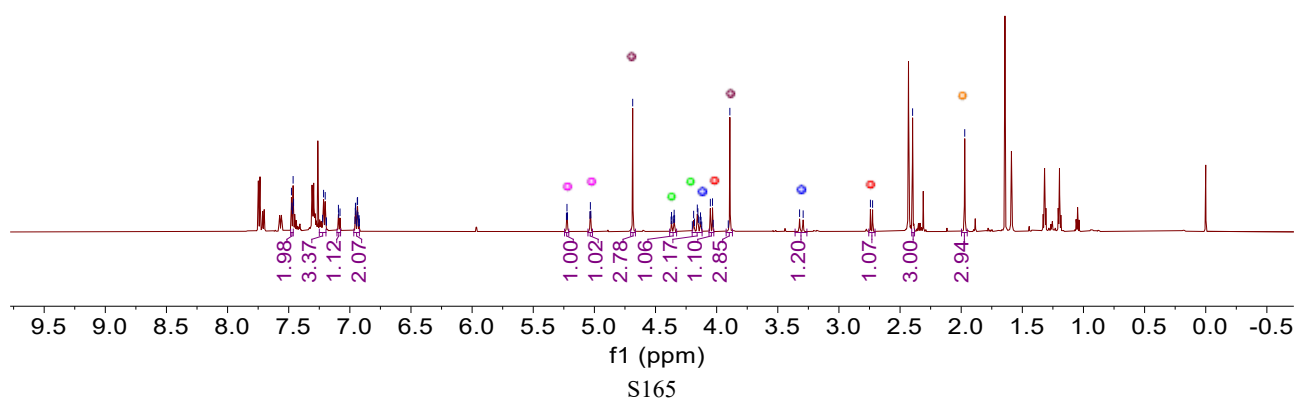

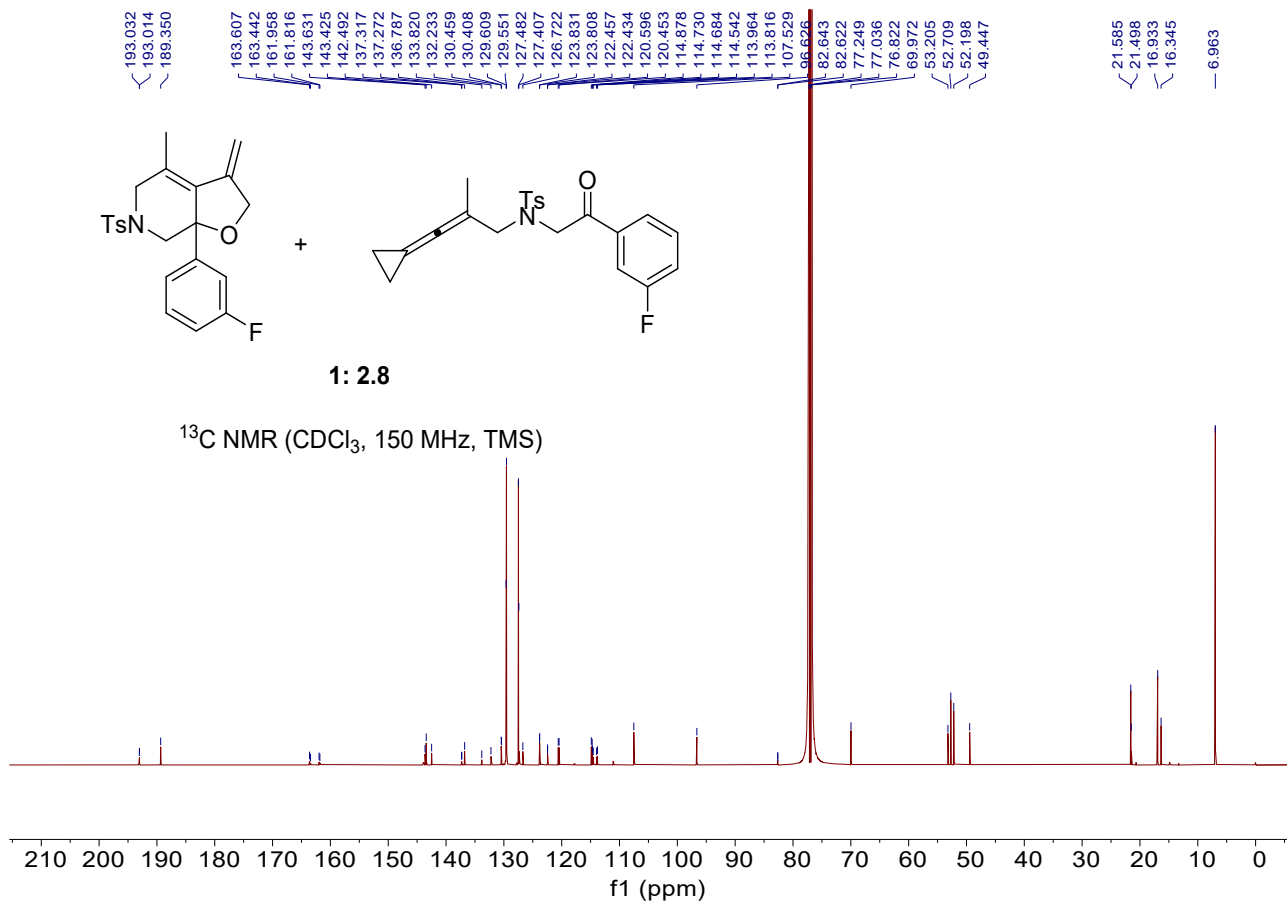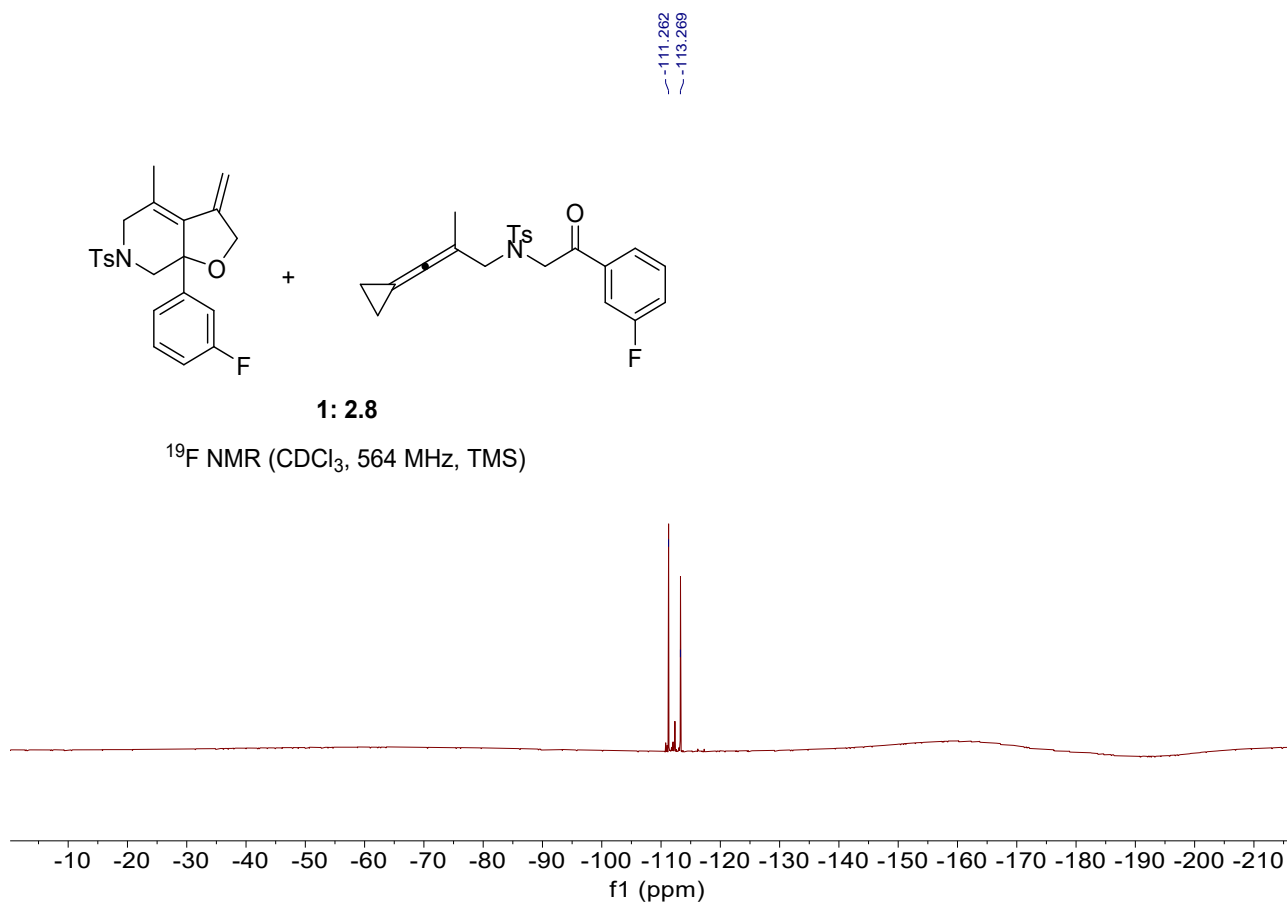

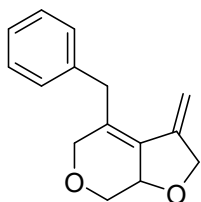

#### 4-benzyl-3-methylene-3,5,7,7a-tetrahydro-2H-furo[2,3-c]pyran (3ad)

A colorless oil, 42% yield, 9.8 mg.  $^1\text{H}$  NMR ( $\text{CDCl}_3$ , TMS, 600 MHz)  $\delta$  7.35 – 7.27 (m, 2H), 7.25 – 7.16 (m, 3H), 5.27 (s, 1H), 5.04 (s, 1H), 4.50 (dt,  $J = 12.8, 2.0$  Hz, 1H), 4.44 (dt,  $J = 12.8, 2.0$  Hz, 1H), 4.41 – 4.35 (m, 1H), 4.29 (dd,  $J = 9.8, 5.6$  Hz, 1H), 4.20 – 4.13 (m, 1H), 3.97 (dd,  $J = 17.2, 2.8$  Hz, 1H), 3.83 (d,  $J = 15.6$  Hz, 1H), 3.38 (d,  $J = 15.6$  Hz, 1H), 3.23 (t,  $J = 9.6$  Hz, 1H).  $^{13}\text{C}$  NMR ( $\text{CDCl}_3$ , TMS, 150 MHz)  $\delta$  143.2, 137.9, 132.0, 130.7, 128.7, 128.1, 126.5, 105.6, 74.03, 74.01, 71.7, 68.60, 68.59, 67.6, 34.0, 29.7. IR (neat)  $\nu$  669, 834, 1152, 1325, 1588, 2898, 2922, 2964  $\text{cm}^{-1}$ . HRMS (ESI) calcd. for  $\text{C}_{15}\text{H}_{19}\text{O}_2$  ( $\text{M}+\text{H}$ ) $^+$ : 229.1224, Found: 229.1220

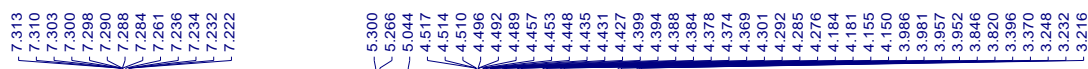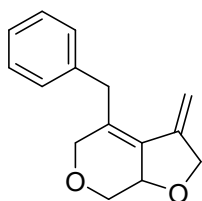

$^1\text{H}$  NMR ( $\text{CDCl}_3$ , 600 MHz, TMS)

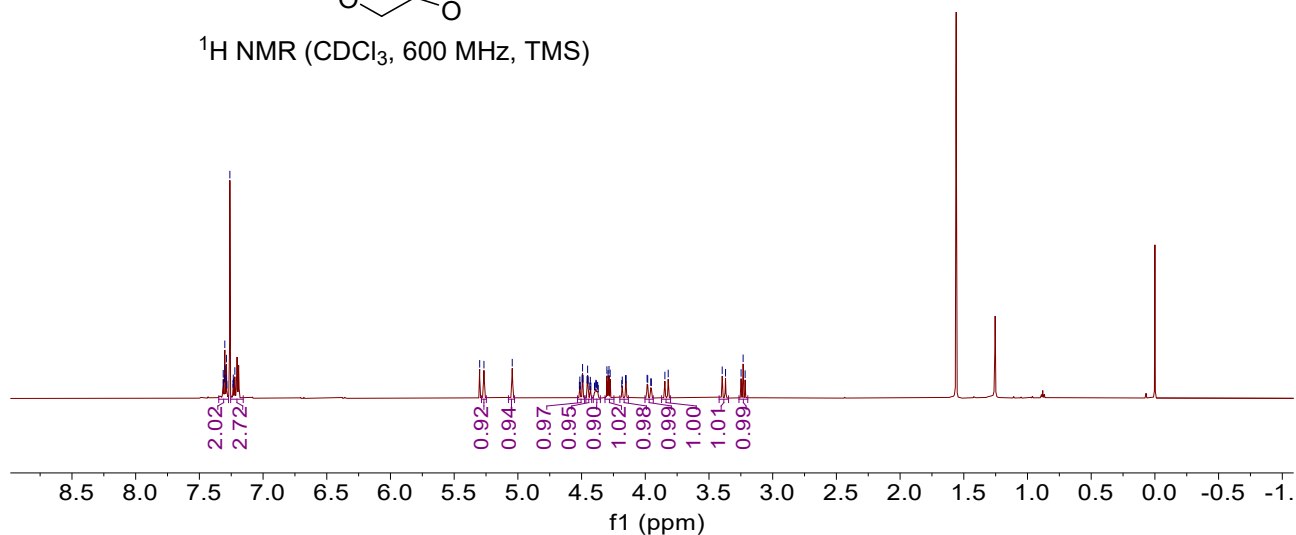

<sup>13</sup>C NMR (CDCl<sub>3</sub>, 150 MHz, TMS)

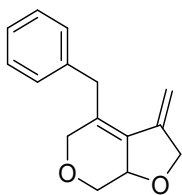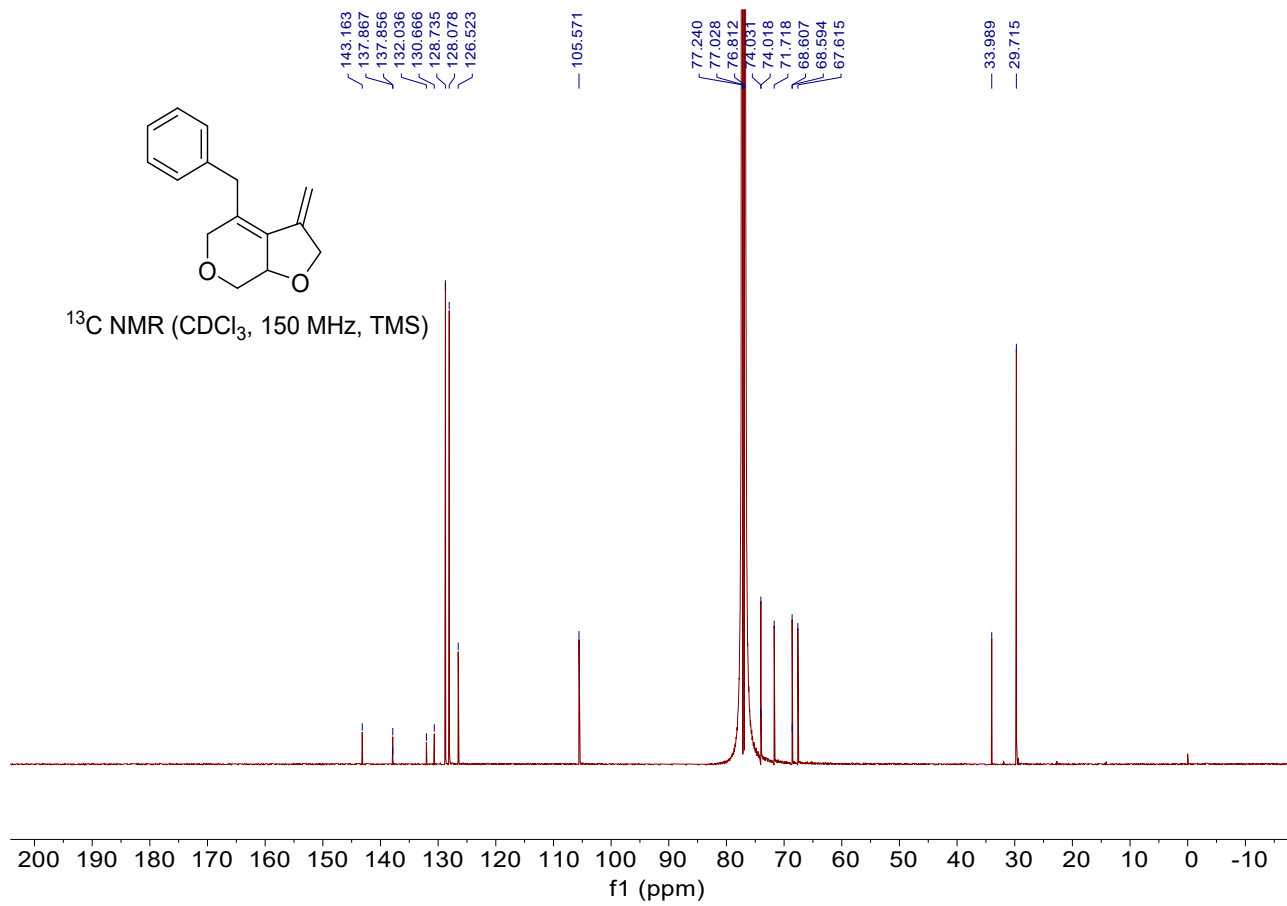



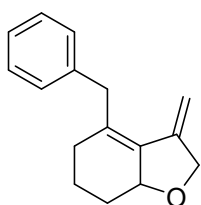

### 4-benzyl-3-methylene-2,3,5,6,7,7a-hexahydrobenzofuran (3ae)

A colorless oil, 40% yield, 9.2 mg.  $^1\text{H}$  NMR ( $\text{CDCl}_3$ , TMS, 600 MHz)  $\delta$  7.31 – 7.27 (m, 2H), 7.23 – 7.15 (m, 3H), 5.21 (s, 1H), 4.97 (s, 1H), 4.49 (dt,  $J = 12.8, 2.0$  Hz, 1H), 4.39 (dt,  $J = 12.8, 2.0$  Hz, 1H), 4.30 – 4.23 (m, 1H), 3.87 (d,  $J = 15.2$  Hz, 1H), 3.44 (d,  $J = 15.2$  Hz, 1H), 2.20 (d,  $J = 4.8$  Hz, 1H), 2.18 – 2.10 (m, 1H), 2.07 – 1.97 (m, 1H), 1.88 – 1.79 (m, 1H), 1.55 – 1.46 (m, 1H), 1.40 – 1.32 (m, 1H).  $^{13}\text{C}$  NMR ( $\text{CDCl}_3$ , TMS, 100 MHz)  $\delta$  144.4, 139.0, 133.9, 128.5, 128.4, 126.2, 104.6, 79.4, 71.7, 38.4, 30.8, 28.6, 19.7. IR (neat)  $\nu$  668, 814, 1162, 1325, 1595, 2848, 2929, 2974  $\text{cm}^{-1}$ . HRMS (ESI) calcd. for  $\text{C}_{16}\text{H}_{19}\text{O}$  ( $\text{M}+\text{H}$ ) $^+$ : 227.1430, Found: 227.1428.

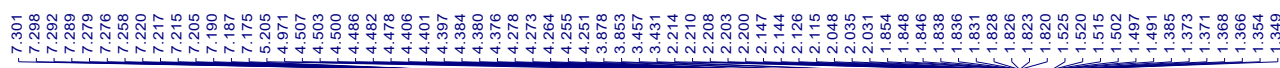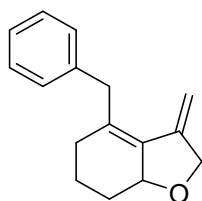

$^1\text{H}$  NMR ( $\text{CDCl}_3$ , 600 MHz, TMS)

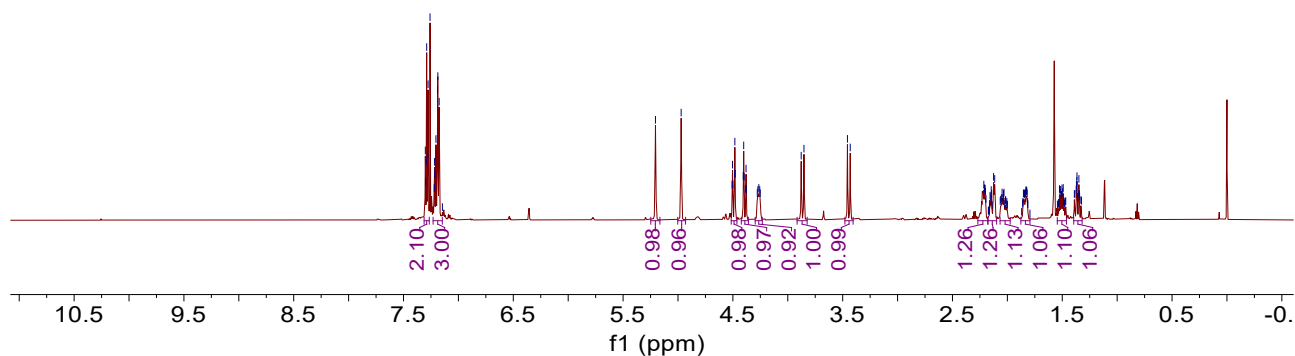

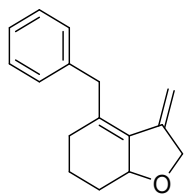

$^{13}\text{C}$  NMR ( $\text{CDCl}_3$ , 100 MHz, TMS)

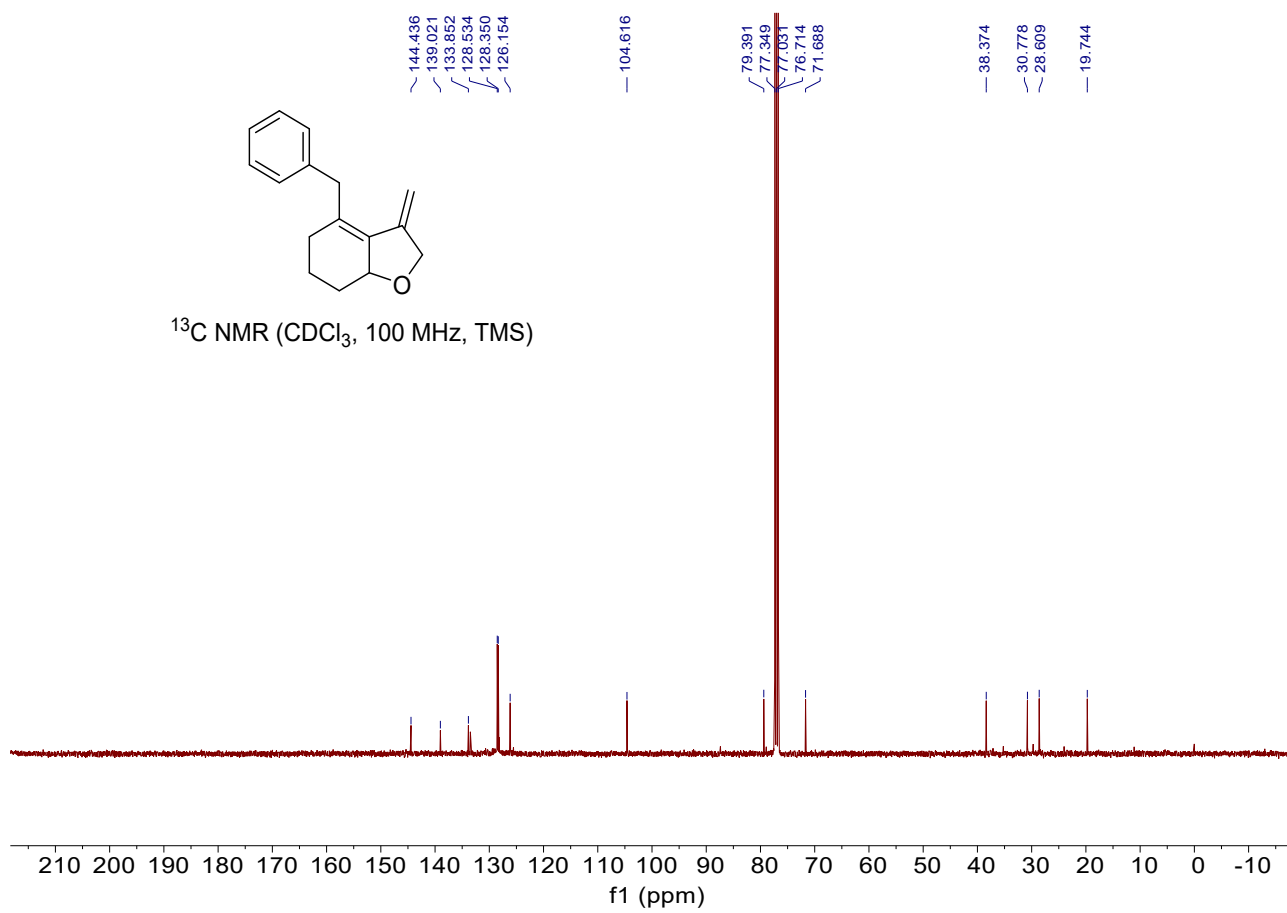

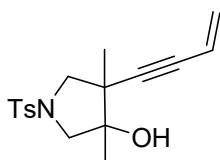

#### 4-(but-3-en-1-yn-1-yl)-3,4-dimethyl-1-tosylpyrrolidin-3-ol (4)

A colorless oil, 82% yield, 26.2 mg.  $^1\text{H}$  NMR ( $\text{CDCl}_3$ , TMS, 400 MHz)  $\delta$  7.73 (d,  $J = 8.0$  Hz, 2H), 7.32 (d,  $J = 8.0$  Hz, 2H), 5.70 (dd,  $J = 17.6, 10.8$  Hz, 1H), 5.57 (dd,  $J = 17.6, 2.4$  Hz, 1H), 5.48 (dd,  $J = 10.8, 2.4$  Hz, 1H), 3.51 (d,  $J = 9.2$  Hz, 1H), 3.41 (d,  $J = 9.2$  Hz, 1H), 3.37 (d,  $J = 1.2$  Hz, 2H), 2.42 (s, 3H), 1.22 (s, 3H), 1.20 (s, 3H).  $^{13}\text{C}$  NMR ( $\text{CDCl}_3$ , TMS, 100 MHz)  $\delta$  143.5, 134.0, 129.6, 127.9, 127.5, 116.2, 88.3, 84.2, 79.7, 57.9, 57.2, 47.0, 22.1, 21.6, 20.0. IR (neat)  $\nu$  664, 760, 1029, 1092, 1162, 1346, 1596, 2853, 2924, 2956  $\text{cm}^{-1}$ . HRMS (ESI) calcd. for  $\text{C}_{17}\text{H}_{22}\text{NO}_3\text{S}$  ( $\text{M}+\text{H}$ ) $^+$ : 320.1315, Found: 320.1308.

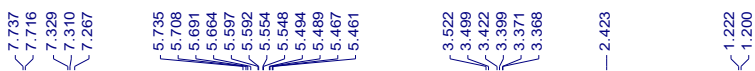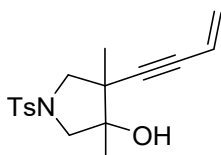

$^1\text{H}$  NMR ( $\text{CDCl}_3$ , 400 MHz, TMS)

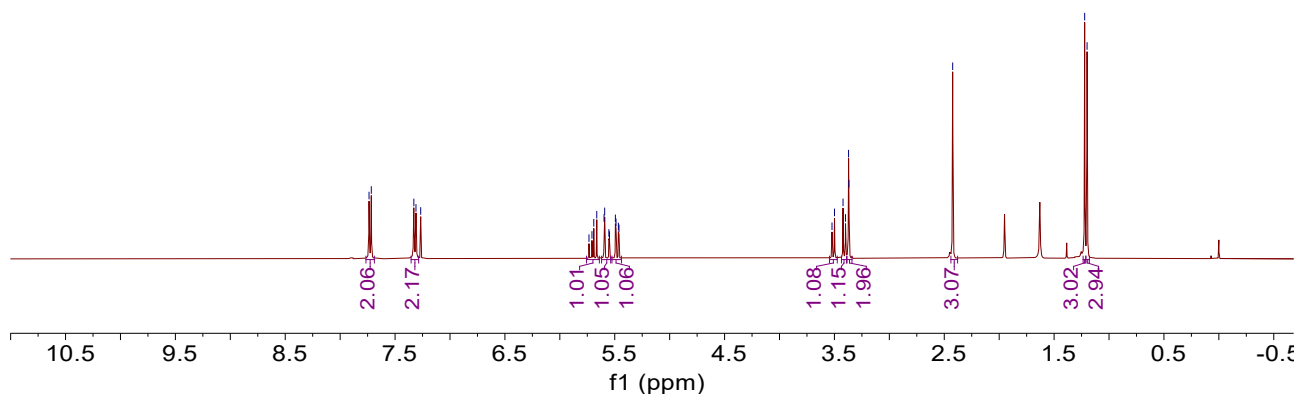

143.467  
134.047  
129.649  
127.931  
127.506  
116.186  
88.273  
84.193  
79.683  
77.366  
77.048  
76.730  
57.912  
57.160  
46.997  
22.091  
21.587  
20.047

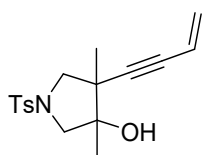

<sup>13</sup>C NMR (CDCl<sub>3</sub>, 100 MHz, TMS)

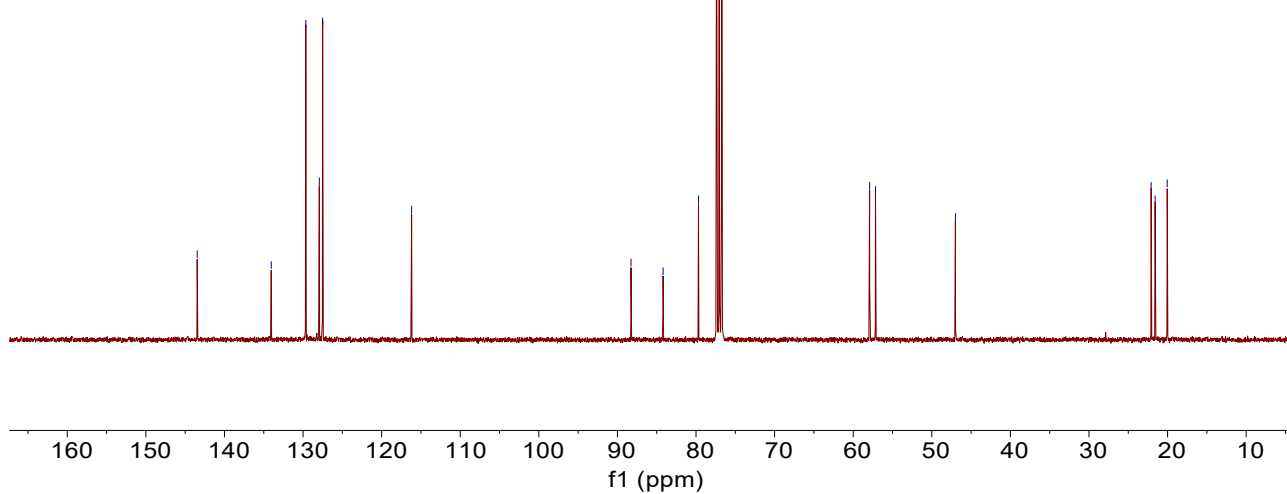

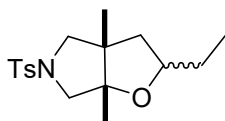

### 2-ethyl-3a,6a-dimethyl-5-tosylhexahydro-2H-furo[2,3-c]pyrrole (5)

A colorless oil, 96% yield, 31.0 mg.  $^1\text{H}$  NMR ( $\text{CDCl}_3$ , TMS, 400 MHz)  $\delta$  7.68 – 7.55 (m, 2H), 7.32 – 7.17 (m, 2H), 3.75 – 3.11 (m, 3H), 3.09 – 2.96 (m, 1H), 2.87 – 2.56 (m, 2H), 2.35 (s, 3H), 1.87 – 1.54 (m, 2H), 1.43 – 1.19 (m, 2H), 1.15 – 1.02 (m, 2H), 1.03 – 0.92 (m, 4H), 0.74 – 0.67 (m, 2H).  $^{13}\text{C}$  NMR ( $\text{CDCl}_3$ , TMS, 100 MHz)  $\delta$  143.5, 132.8, 129.6, 127.8, 89.7, 78.4, 78.1, 60.1, 59.6, 50.9, 44.2, 28.9, 21.6, 20.4, 18.9, 10.3. IR (neat)  $\nu$  666, 762, 1092, 1162, 1346, 1596, 2863, 2954  $\text{cm}^{-1}$ . HRMS (ESI) calcd. for  $\text{C}_{17}\text{H}_{24}\text{NO}_3\text{S}$  (M-H) $^+$ : 322.1471, Found: 322.1465.

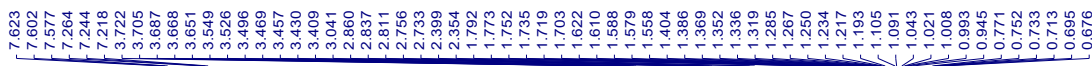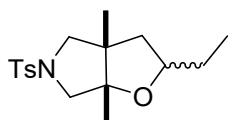

$^1\text{H}$  NMR ( $\text{CDCl}_3$ , 400 MHz, TMS)

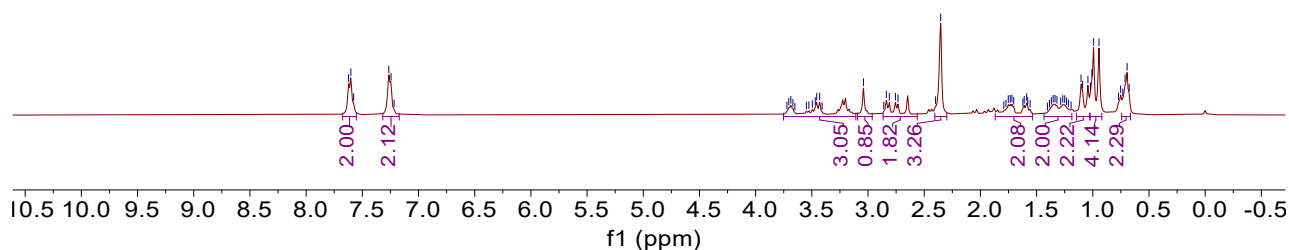

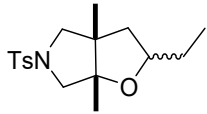

<sup>13</sup>C NMR (CDCl<sub>3</sub>, 100 MHz, TMS)

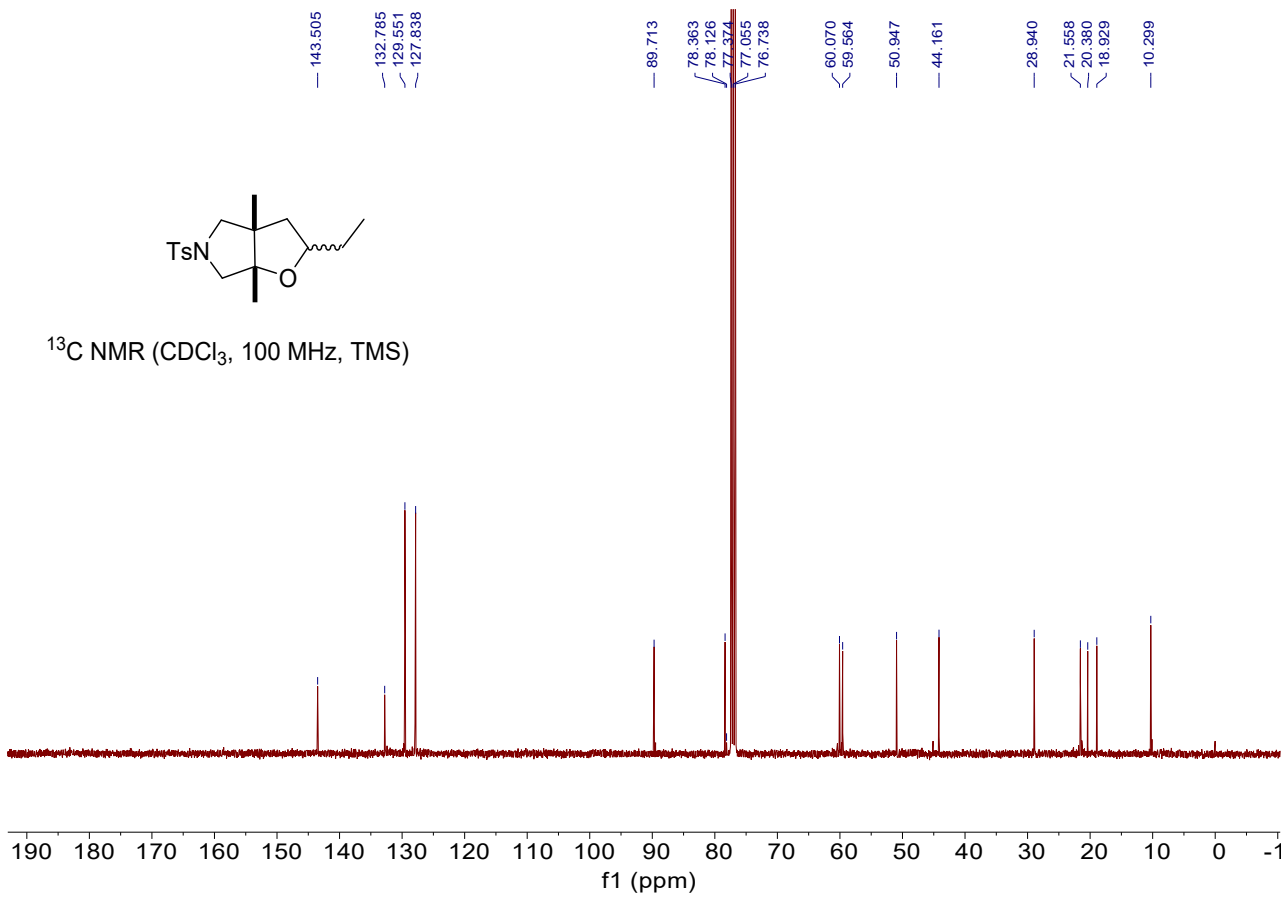

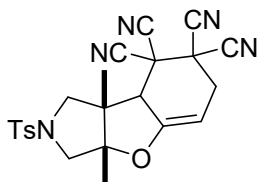

**3a,8b-dimethyl-2-tosyl-2,3,3a,6,8a,8b-hexahydro-1H-benzofuro[2,3-c]pyrrole-7,7,8,8-tetracarbonitrile (6)**

A colorless oil, 90% yield, 40.2 mg.  $^1\text{H}$  NMR ( $\text{CDCl}_3$ , TMS, 400 MHz)  $\delta$  7.72 (d,  $J = 8.0$  Hz, 2H), 7.36 (d,  $J = 8.0$  Hz, 2H), 4.97 – 4.84 (m, 1H), 3.66 (d,  $J = 10.8$  Hz, 1H), 3.58 – 3.49 (m, 2H), 3.24 – 3.13 (m, 2H), 3.09 (d,  $J = 11.2$  Hz, 1H), 2.86 (d,  $J = 10.8$  Hz, 1H), 2.45 (s, 3H), 1.39 (s, 3H), 1.31 (s, 3H).  $^{13}\text{C}$  NMR ( $\text{CDCl}_3$ , TMS, 150 MHz)  $\delta$  149.2, 144.9, 132.1, 130.2, 127.8, 110.6, 110.2, 109.44, 109.43, 109.2, 94.2, 88.2, 58.2, 58.1, 52.2, 49.0, 40.3, 39.7, 32.3, 21.7, 20.9, 14.8. IR (neat)  $\nu$  665, 828, 1092, 1164, 1351, 1592, 2159, 2165, 2848, 2869, 2916, 2969  $\text{cm}^{-1}$ . HRMS (ESI) calcd. for  $\text{C}_{23}\text{H}_{22}\text{N}_5\text{O}_3\text{S}$  ( $\text{M}+\text{H}$ ) $^+$ : 448.1438, Found: 448.1432.

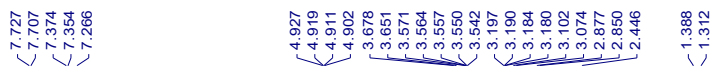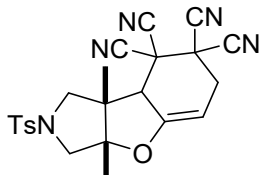

$^1\text{H}$  NMR ( $\text{CDCl}_3$ , 400 MHz, TMS)

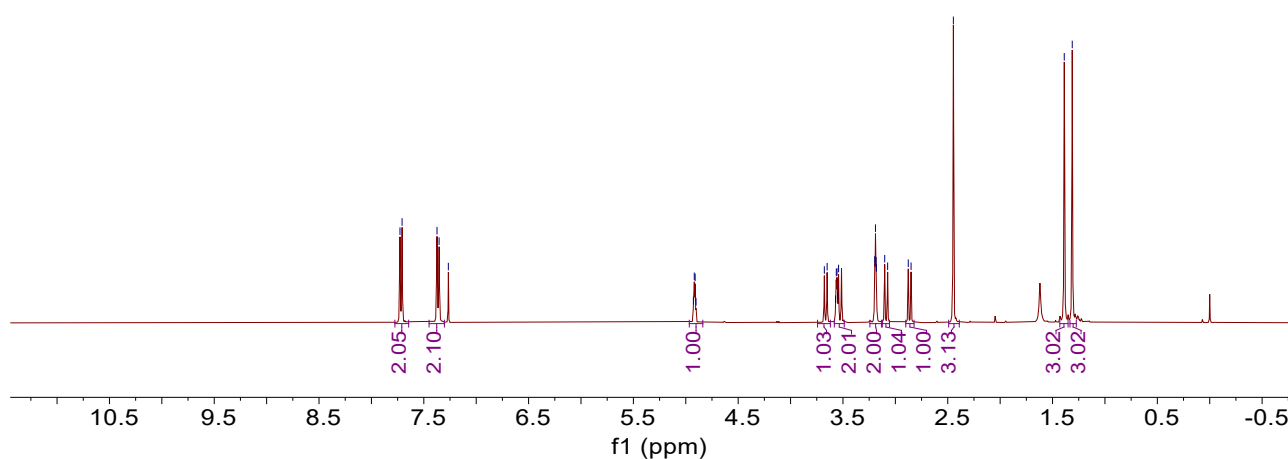

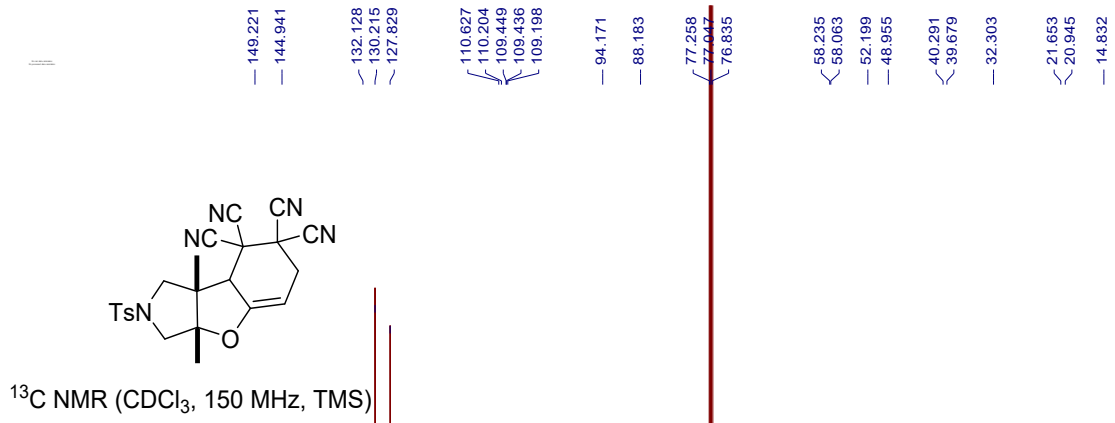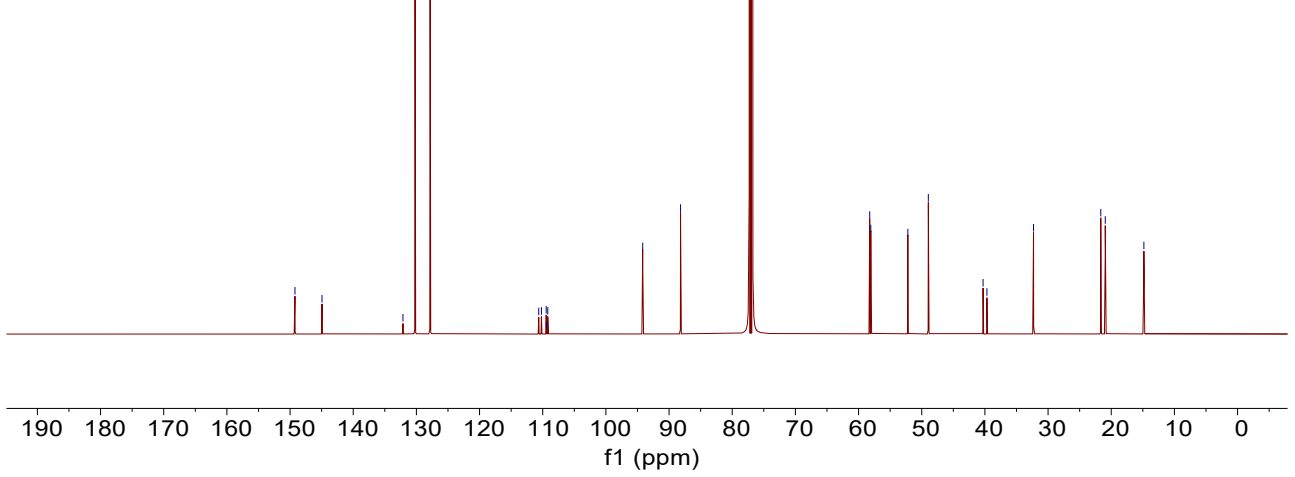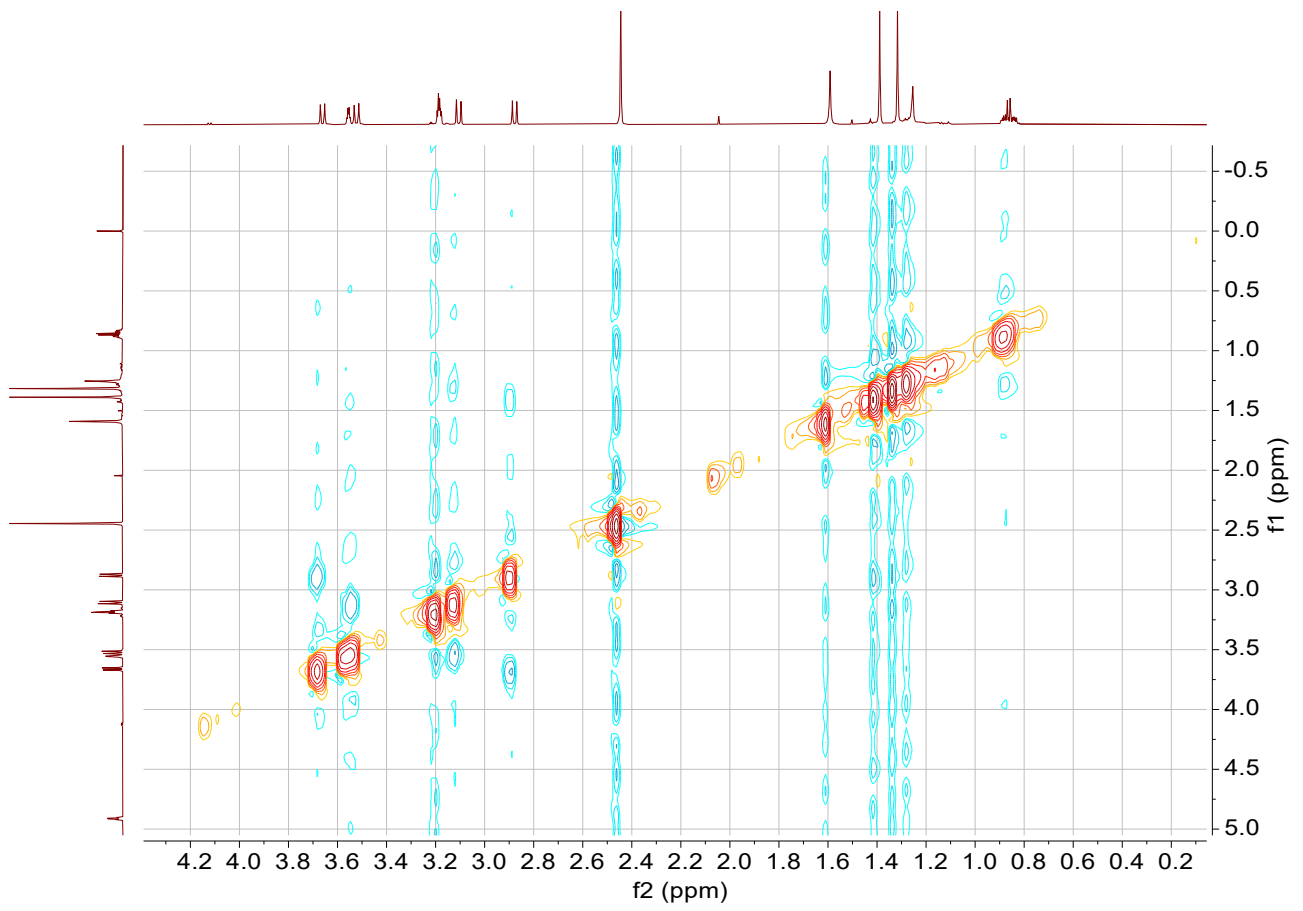



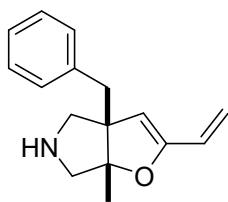

**3a-benzyl-6a-methyl-2-vinyl-3a,5,6,6a-tetrahydro-4H-furo[2,3-c]pyrrole (7)**

A brown oil, 90% yield, 31.2 mg.  $^1\text{H}$  NMR ( $\text{CDCl}_3$ , TMS, 400 MHz)  $\delta$  7.33 – 7.16 (m, 5H), 6.12 (dd,  $J = 17.4, 10.8$  Hz, 1H), 5.49 (dd,  $J = 17.4, 1.6$  Hz, 1H), 5.19 (dd,  $J = 10.8, 1.6$  Hz, 1H), 4.54 (s, 1H), 3.37 (d,  $J = 12.6$  Hz, 1H), 3.12 – 2.58 (m, 5H), 2.37 – 1.98 (m, 1H), 1.44 (s, 3H).  $^{13}\text{C}$  NMR ( $\text{CDCl}_3$ , TMS, 150 MHz)  $\delta$  154.4, 138.8, 129.7, 128.3, 126.3, 125.9, 116.0, 105.5, 77.4, 62.8, 60.9, 41.4, 19.3. IR (neat)  $\nu$  663, 815, 1092, 1161, 1341, 1597, 2848, 2867, 2932, 2968  $\text{cm}^{-1}$ . HRMS (ESI) calcd. for  $\text{C}_{16}\text{H}_{20}\text{NO}$  ( $\text{M}+\text{H}$ ) $^+$ : 242.1539, Found: 242.1535.

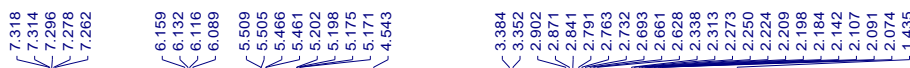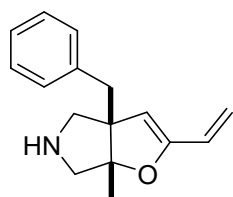

$^1\text{H}$  NMR ( $\text{CDCl}_3$ , 400 MHz, TMS)

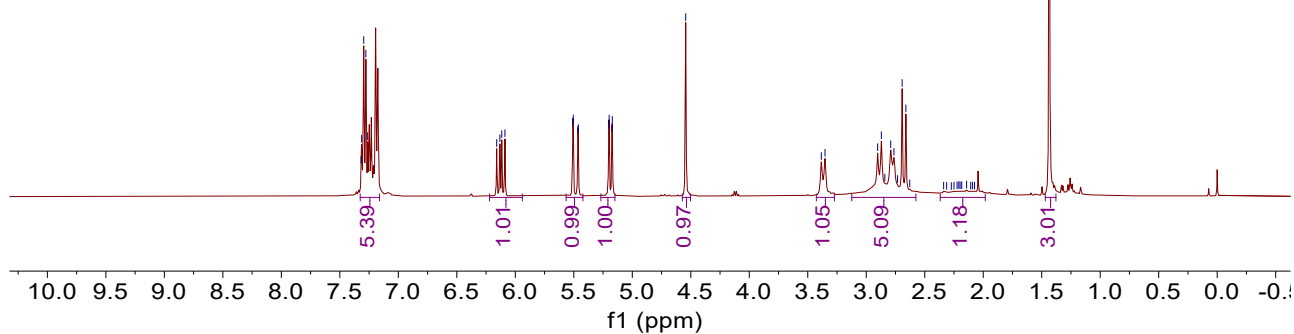

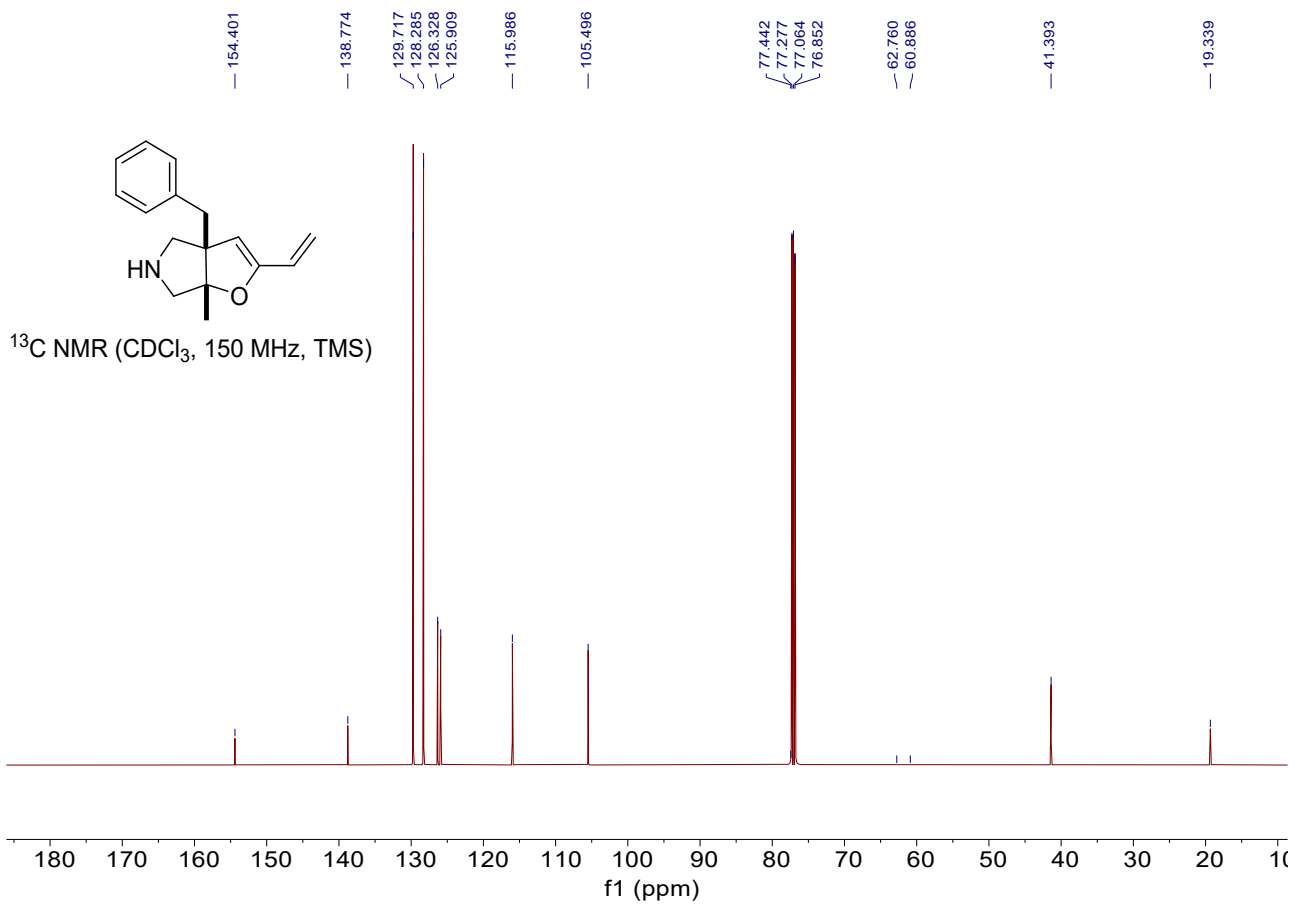

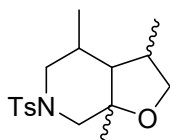

### 3,4,7a-trimethyl-6-tosyloctahydrofuro[2,3-c]pyridine (8)

A colorless oil, 80% yield, 26.0 mg.  $^1\text{H}$  NMR ( $\text{CDCl}_3$ , TMS, 400 MHz)  $\delta$  7.73 – 7.58 (m, 2H), 7.38 – 7.28 (m, 2H), 4.63 – 3.93 (m, 2H), 3.92 – 3.59 (m, 2H), 3.47 – 2.78 (m, 2H), 2.45 – 2.39 (m, 3H), 2.33 – 2.08 (m, 1H), 2.07 – 1.64 (m, 3H), 1.62 – 1.38 (m, 3H), 1.29 – 1.10 (m, 5H).  $^{13}\text{C}$  NMR ( $\text{CDCl}_3$ , TMS, 150 MHz)  $\delta$  143.6, 143.5, 143.5, 140.7, 140.4, 133.8, 133.6, 129.7, 129.7, 127.5, 127.5, 127.5, 119.8, 119.5, 88.0, 79.4, 78.0, 73.6, 72.8, 60.4, 57.3, 54.2, 53.3, 52.9, 48.6, 48.5, 35.0, 34.8, 32.4, 27.9, 23.2, 23.2, 22.7, 22.7, 21.5, 21.5, 21.1, 19.2, 18.4, 16.6, 15.8, 15.7, 14.2, 10.3. IR (neat)  $\nu$  666, 814, 1062, 1163, 1347, 1593, 2849, 2869, 2928  $\text{cm}^{-1}$ . HRMS (ESI) calcd. for  $\text{C}_{17}\text{H}_{24}\text{NO}_3\text{S}$  (M-H) $^+$ : 324.1628, Found: 324.1621.

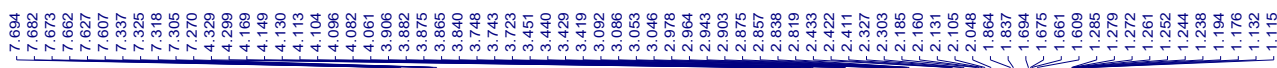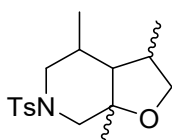

$^1\text{H}$  NMR ( $\text{CDCl}_3$ , 400 MHz, TMS)

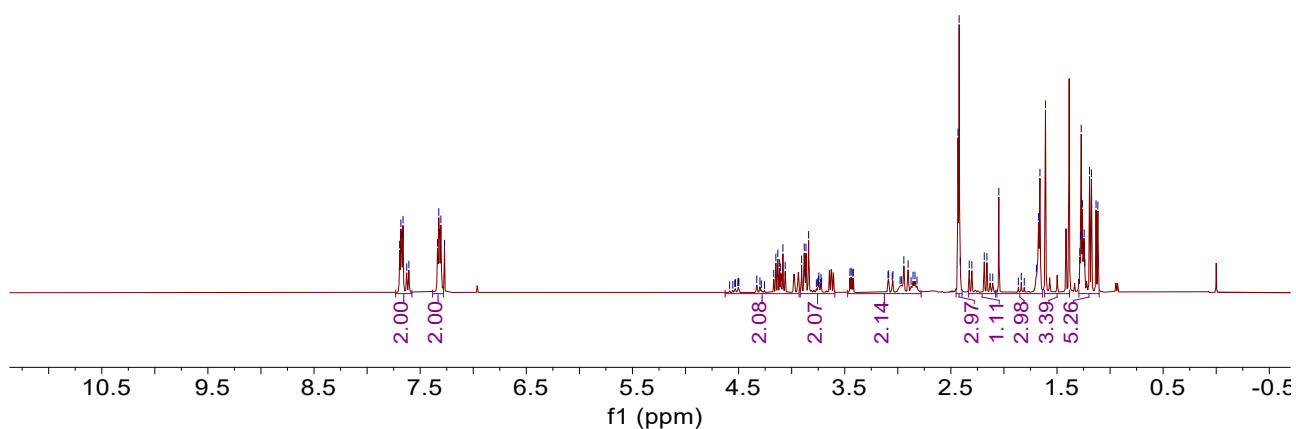

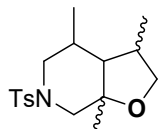

$^{13}\text{C}$  NMR ( $\text{CDCl}_3$ , 150 MHz, TMS)

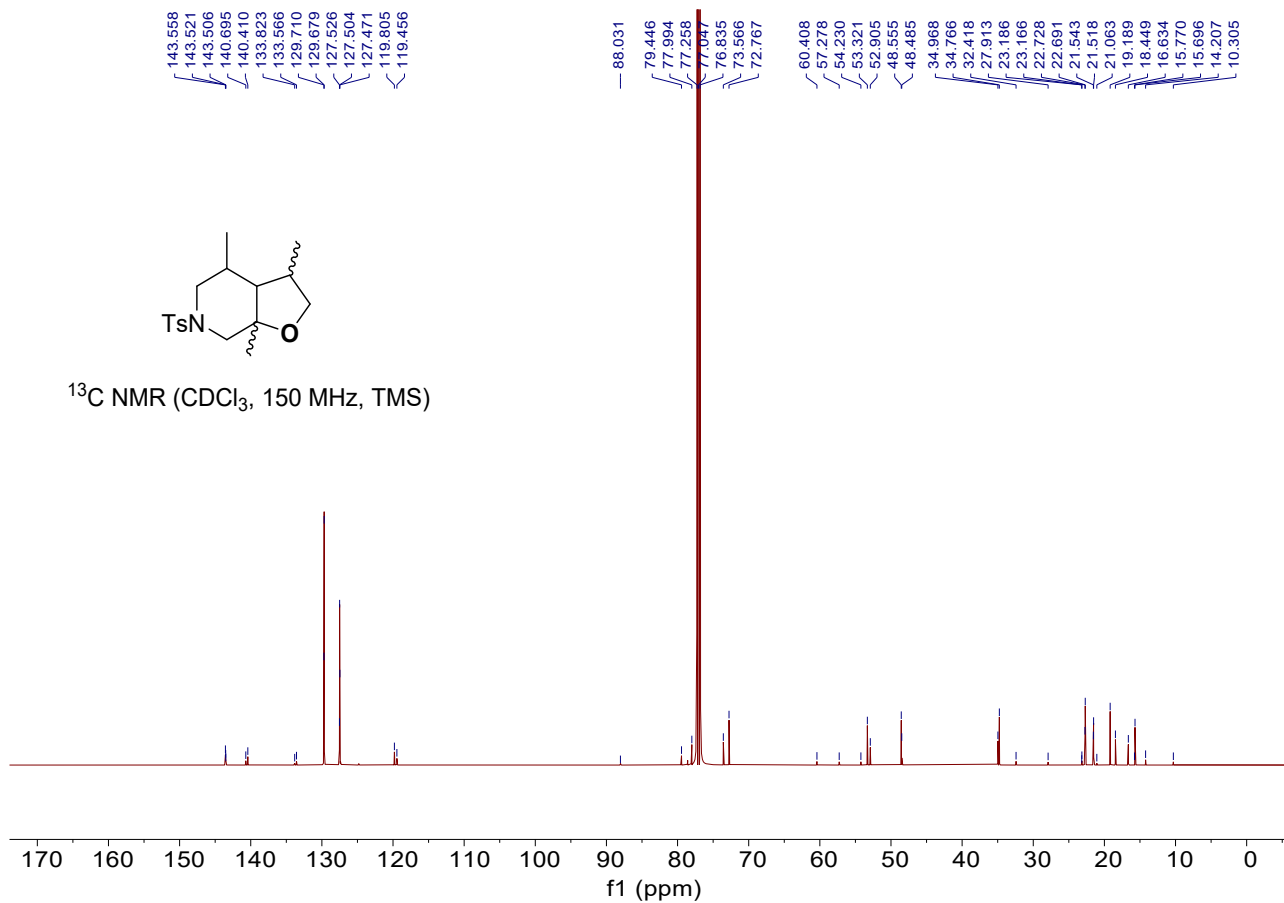

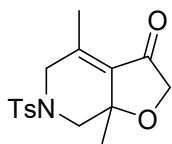

**4,7a-dimethyl-6-tosyl-5,6,7,7a-tetrahydrofuro[2,3-c]pyridin-3(2H)-one (9)**

A colorless oil, 90% yield, 28.9 mg.  $^1\text{H}$  NMR ( $\text{CDCl}_3$ , TMS, 400 MHz)  $\delta$  7.70 (d,  $J = 8.0$  Hz, 2H), 7.36 (d,  $J = 8.0$  Hz, 2H), 4.21 (d,  $J = 19.0$  Hz, 1H), 4.15 (d,  $J = 16.8$  Hz, 1H), 4.04 – 3.95 (m, 2H), 3.16 (d,  $J = 18.8$  Hz, 1H), 2.44 (s, 3H), 2.41 (d,  $J = 10.4$  Hz, 1H), 2.07 (s, 3H), 1.47 (s, 3H).  $^{13}\text{C}$  NMR ( $\text{CDCl}_3$ , TMS, 100 MHz)  $\delta$  201.7, 144.2, 141.3, 133.2, 132.4, 130.0, 127.4, 79.0, 70.2, 52.8, 49.7, 22.9, 21.6, 15.2. IR (neat)  $\nu$  666, 815, 1092, 1163, 1347, 1592, 1692, 2852, 2929  $\text{cm}^{-1}$ . HRMS (ESI) calcd. for  $\text{C}_{16}\text{H}_{20}\text{NO}_4\text{S}$  ( $\text{M}+\text{H}$ ) $^+$ : 322.1108, Found: 322.1100.

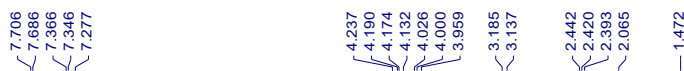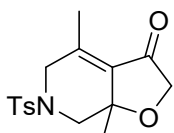

$^1\text{H}$  NMR ( $\text{CDCl}_3$ , 400 MHz, TMS)

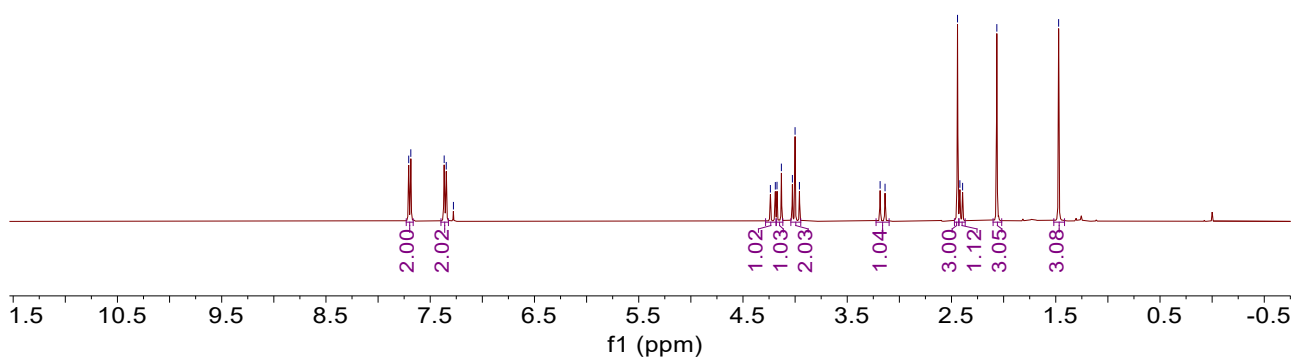

— 201.731

— 144.183  
— 141.281  
— 133.199  
— 132.449  
— 129.972  
— 127.438

79.018  
77.397  
77.076  
76.759  
— 70.185

— 52.803  
— 49.721

— 22.852  
— 21.579  
— 15.199

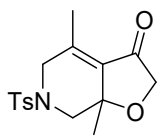

$^{13}\text{C}$  NMR ( $\text{CDCl}_3$ , 100 MHz, TMS)

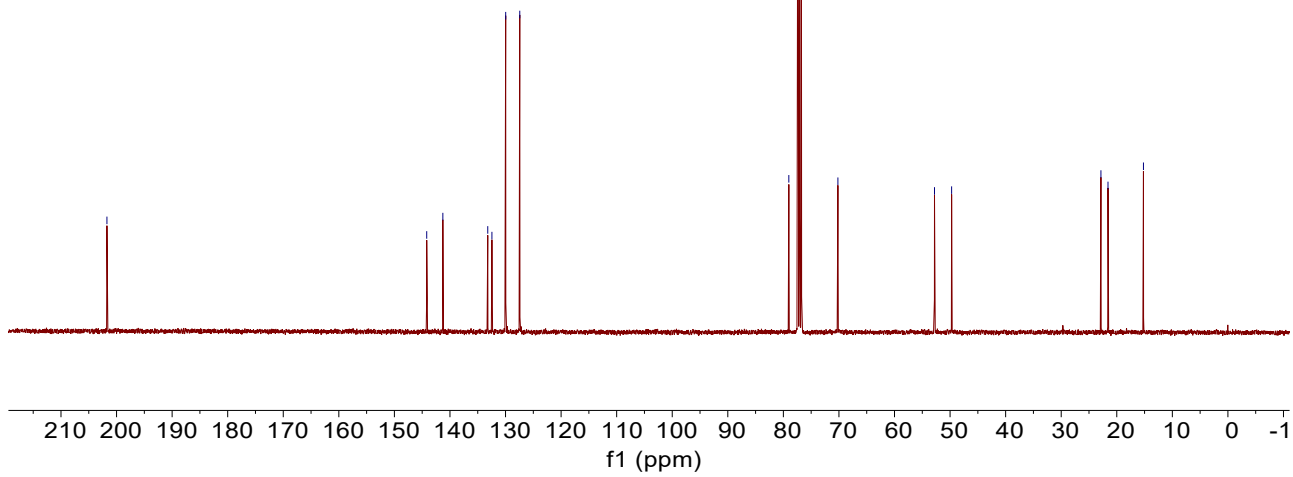

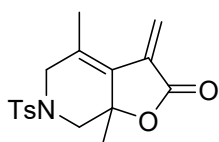

**4,7a-dimethyl-3-methylene-6-tosyl-5,6,7,7a-tetrahydrofuro[2,3-c]pyridin-2(3H)-one (10)**

A yellow oil, 36% yield, 11.9 mg.  $^1\text{H}$  NMR ( $\text{CDCl}_3$ , TMS, 400 MHz)  $\delta$  7.64 (d,  $J = 8.0$  Hz, 2H), 7.34 (d,  $J = 8.0$  Hz, 2H), 5.51 (d,  $J = 2.0$  Hz, 1H), 5.31 (d,  $J = 2.0$  Hz, 1H), 4.49 – 4.41 (m, 1H), 4.15 (dd,  $J = 10.8, 1.6$  Hz, 1H), 2.98 (dt,  $J = 13.2, 2.0$  Hz, 1H), 2.44 – 2.42 (m, 3H), 2.24 (d,  $J = 10.8$  Hz, 1H), 1.82 (s, 3H), 1.58 (s, 3H).  $^{13}\text{C}$  NMR ( $\text{CDCl}_3$ , TMS, 100 MHz)  $\delta$  159.5, 144.4, 132.8, 130.0, 127.5, 117.9, 82.0, 55.2, 51.7, 22.7, 21.6, 9.0. IR (neat)  $\nu$  666, 977, 1210, 1345, 1592, 1672, 2869, 2907  $\text{cm}^{-1}$ . HRMS (ESI) calcd. for  $\text{C}_{17}\text{H}_{20}\text{NO}_4\text{S}$  ( $\text{M}+\text{H}$ ) $^+$ : 334.1108, Found: 334.1099.

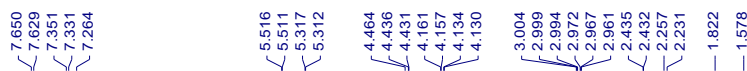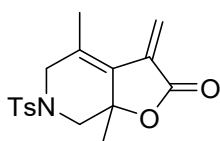

$^1\text{H}$  NMR ( $\text{CDCl}_3$ , 400 MHz, TMS)

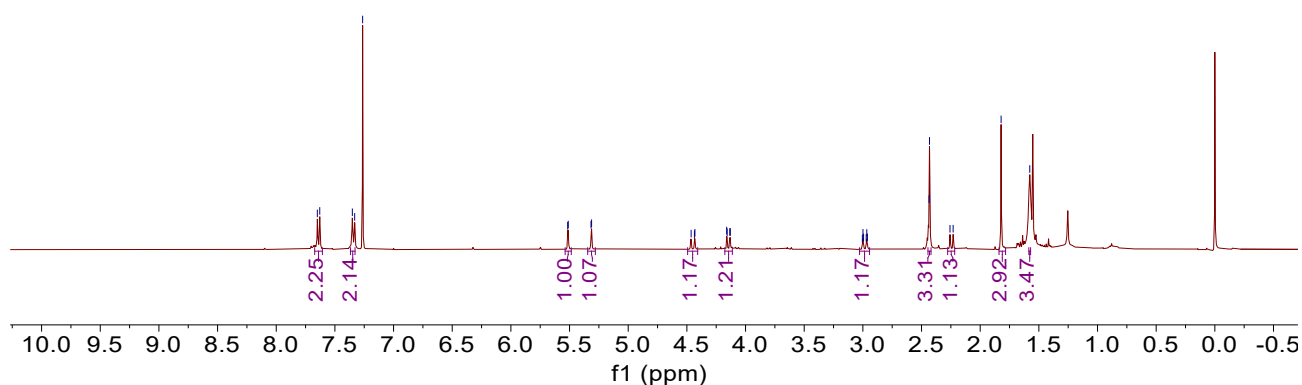

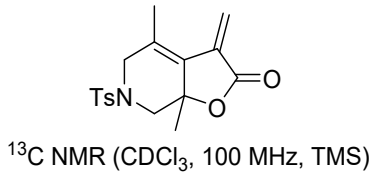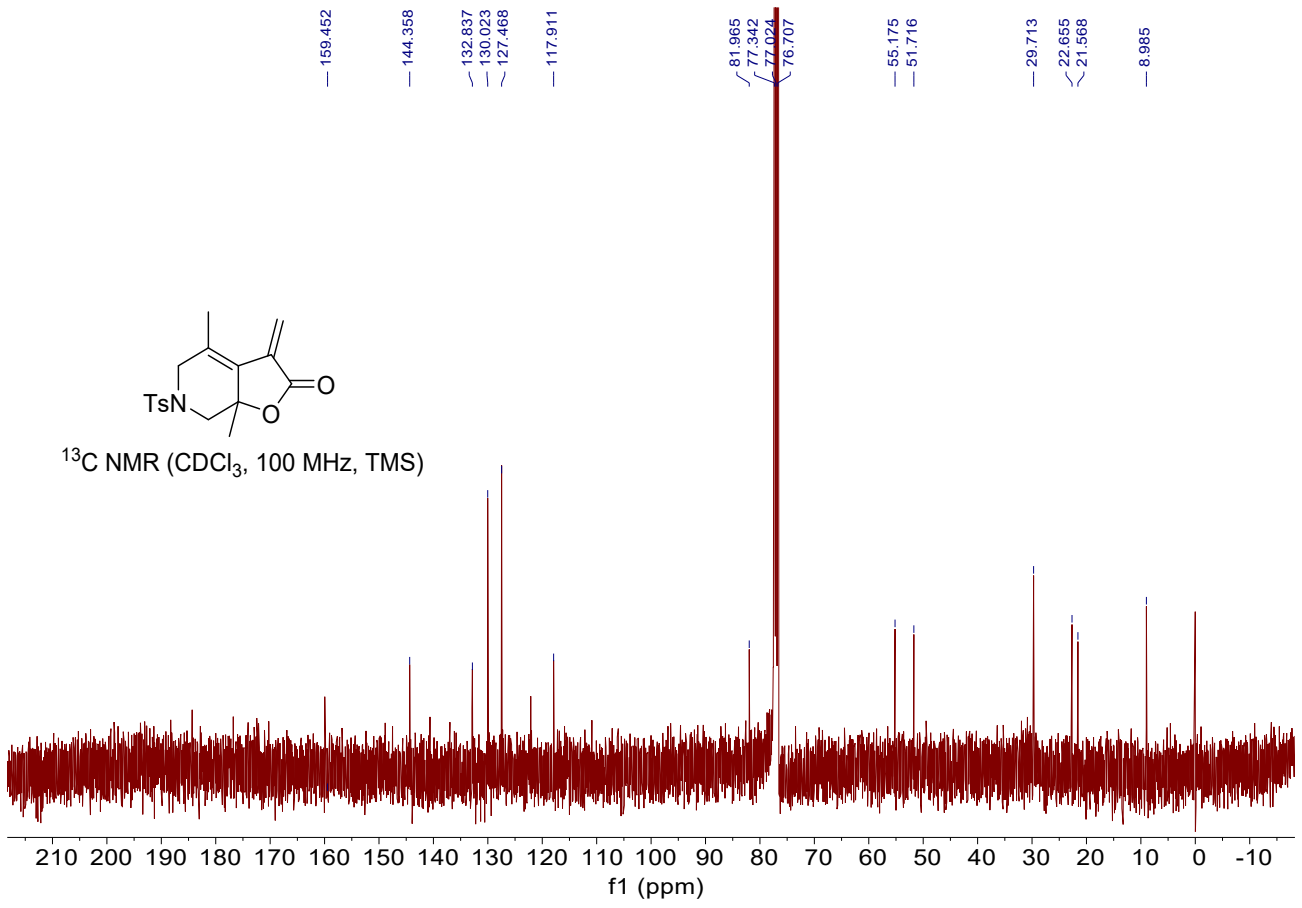



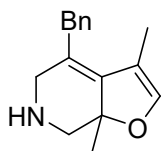

#### 4-benzyl-3,7a-dimethyl-5,6,7,7a-tetrahydrofuro[2,3-c]pyridine (11)

A brown oil, 62% yield, 14.9 mg.  $^1\text{H}$  NMR ( $\text{CDCl}_3$ , TMS, 400 MHz)  $\delta$  7.39 – 7.32 (m, 2H), 7.32 – 7.25 (m, 2H), 7.20 – 7.15 (m, 1H), 6.38 (s, 1H), 4.70 (d,  $J = 12.6$  Hz, 1H), 4.51 (d,  $J = 12.6$  Hz, 1H), 3.52 (d,  $J = 13.6$  Hz, 1H), 3.30 (d,  $J = 14.8$  Hz, 1H), 3.11 (d,  $J = 12.4$  Hz, 1H), 2.86 (d,  $J = 12.4$  Hz, 1H), 1.92 (brs, 1H), 1.50 (s, 3H), 1.17 (s, 3H).  $^{13}\text{C}$  NMR ( $\text{CDCl}_3$ , TMS, 100 MHz)  $\delta$  137.2, 134.3, 128.3, 128.0, 126.74, 126.65, 125.5, 77.9, 59.1, 55.7, 55.6, 29.7, 23.0, 11.3. IR (neat)  $\nu$  665, 987, 1347, 1640, 2851, 2869, 2926, 2974  $\text{cm}^{-1}$ . HRMS (ESI) calcd. for  $\text{C}_{16}\text{H}_{20}\text{NO}$  ( $\text{M}+\text{H}$ ) $^+$ : 242.1539, Found: 242.1534.

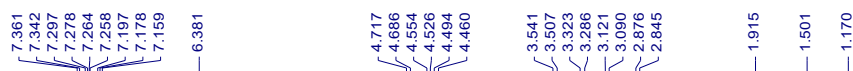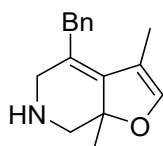

$^1\text{H}$  NMR ( $\text{CDCl}_3$ , 400 MHz, TMS)

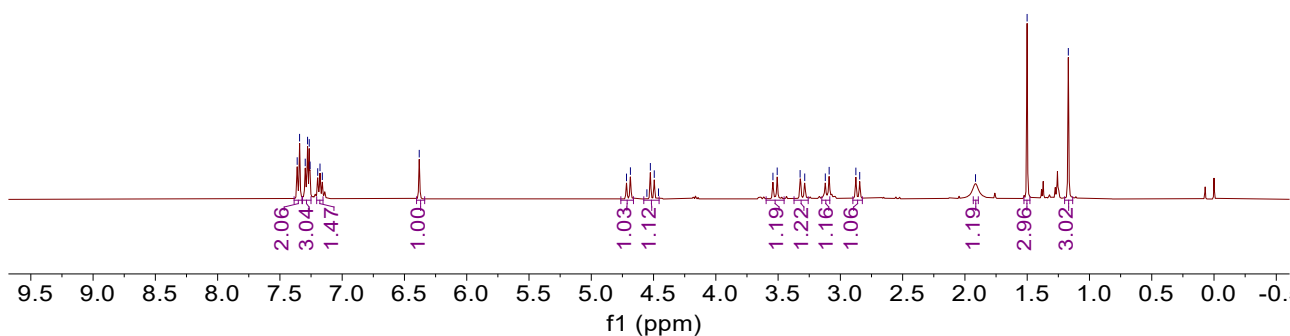

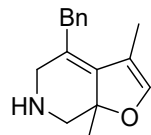

<sup>13</sup>C NMR (CDCl<sub>3</sub>, 100 MHz, TMS)

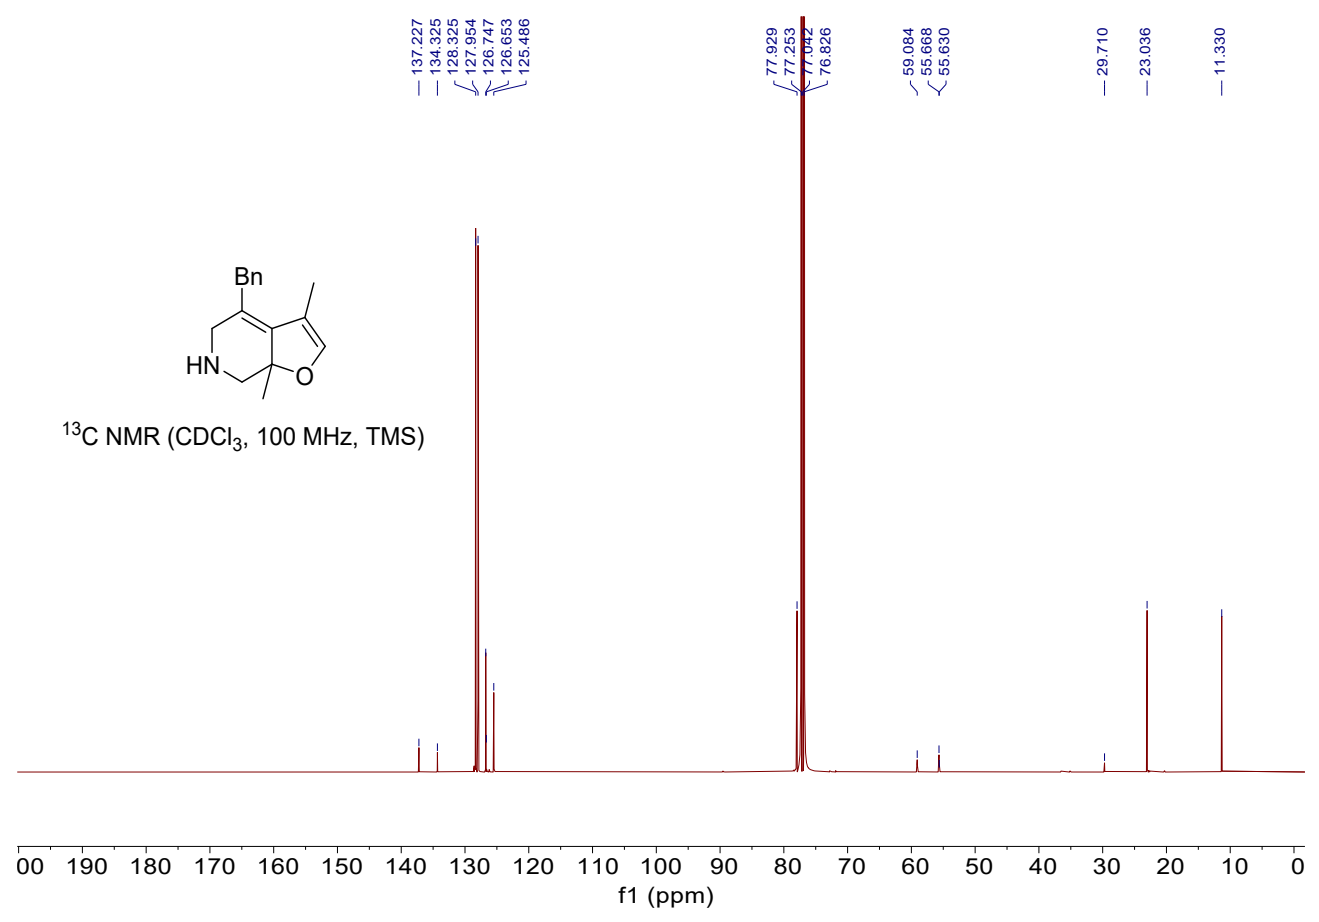

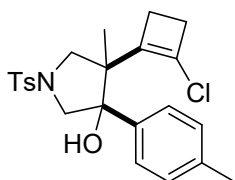

#### 4-(2-chlorocyclobut-1-en-1-yl)-4-methyl-3-(p-tolyl)-1-tosylpyrrolidin-3-ol (12)

A colorless oil, 46% yield, 19.8 mg.  $^1\text{H}$  NMR ( $\text{CDCl}_3$ , TMS, 400 MHz)  $\delta$  7.79 (d,  $J = 8.2$  Hz, 2H), 7.34 (d,  $J = 8.0$  Hz, 2H), 7.18 (d,  $J = 8.2$  Hz, 2H), 7.11 (d,  $J = 8.0$  Hz, 2H), 4.15 (s, 1H), 4.05 (d,  $J = 9.2$  Hz, 1H), 3.46 (d,  $J = 11.4$  Hz, 1H), 3.40 (d,  $J = 9.2$  Hz, 1H), 2.55 (t,  $J = 3.2$  Hz, 2H), 2.44 (s, 4H), 2.32 (s, 3H), 2.31 – 2.27 (m, 1H), 2.21 – 2.14 (m, 1H), 1.80 (brs, 1H), 0.92 (s, 3H).  $^{13}\text{C}$  NMR ( $\text{CDCl}_3$ , TMS, 100 MHz)  $\delta$  143.6, 141.3, 138.0, 135.5, 134.0, 129.7, 128.8, 127.6, 126.2, 123.9, 84.4, 57.7, 56.0, 51.3, 33.5, 28.5, 21.6, 21.2, 21.0. IR (neat)  $\nu$  668, 814, 1038, 1163, 1343, 1463, 2869, 2936  $\text{cm}^{-1}$ . HRMS (ESI) calcd. for  $\text{C}_{23}\text{H}_{27}\text{NO}_3\text{SCl}$  ( $\text{M}+\text{H}$ ) $^+$ : 432.1395, Found: 432.1394.

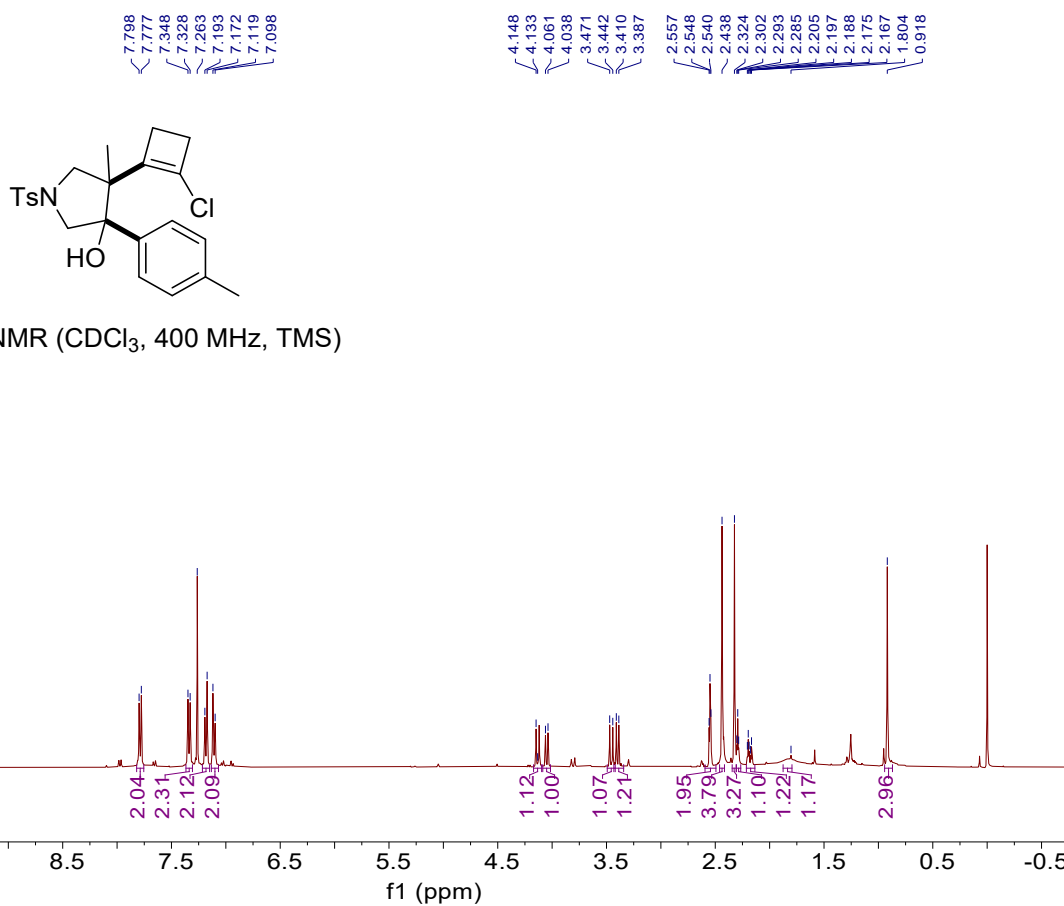

143.598  
141.338  
138.004  
135.470  
134.040  
129.677  
128.847  
127.569  
126.202  
123.924

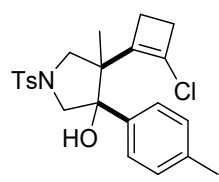

<sup>13</sup>C NMR (CDCl<sub>3</sub>, 100 MHz, TMS)

84.365  
77.357  
77.046  
76.722

57.710  
55.953  
51.345

33.511

28.530

21.626  
21.203  
21.020

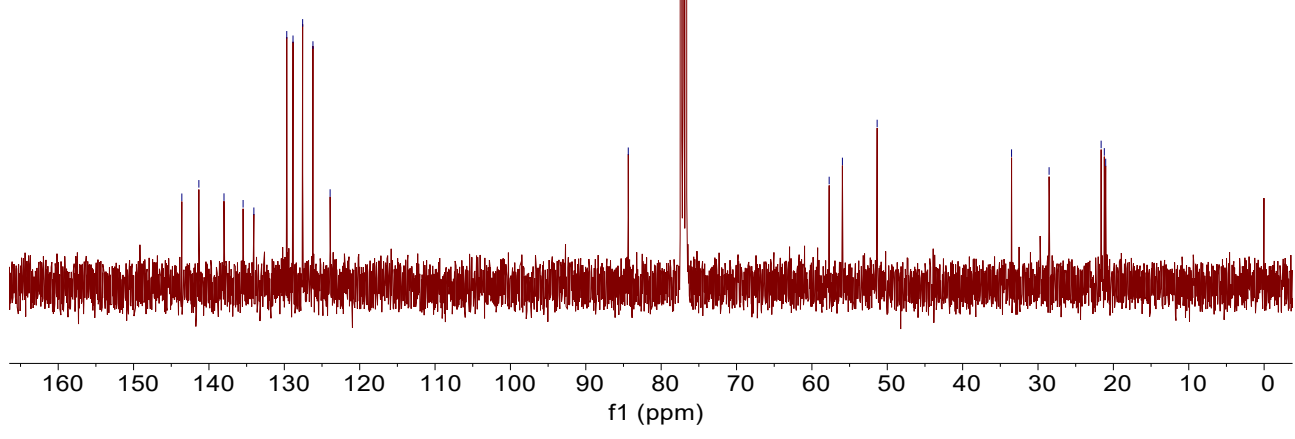

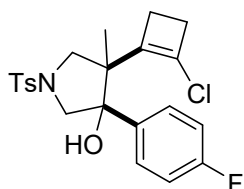

#### 4-(2-chlorocyclobut-1-en-1-yl)-3-(4-fluorophenyl)-4-methyl-1-tosylpyrrolidin-3-ol (13)

A colorless oil, 38% yield, 16.6 mg.  $^1\text{H}$  NMR ( $\text{CDCl}_3$ , TMS, 400 MHz)  $\delta$  7.78 (d,  $J = 8.2$  Hz, 2H), 7.35 (d,  $J = 8.0$  Hz, 2H), 7.31 – 7.27 (m, 2H), 7.03 – 6.94 (m, 2H), 4.10 (d,  $J = 11.4$  Hz, 1H), 4.01 (d,  $J = 9.4$  Hz, 1H), 3.47 (d,  $J = 11.4$  Hz, 1H), 3.39 (d,  $J = 9.4$  Hz, 1H), 2.56 (dd,  $J = 4.2, 2.8$  Hz, 2H), 2.44 (s, 3H), 2.37 – 2.28 (m, 1H), 2.23 – 2.10 (m, 1H), 1.81 (brs, 1H), 0.91 (s, 3H).  $^{13}\text{C}$  NMR ( $\text{CDCl}_3$ , TMS, 100 MHz)  $\delta$  162.5 (d,  $J_{\text{C-F}} = 242.1$  Hz), 143.8, 141.0, 134.2 (d,  $J_{\text{C-F}} = 3.3$  Hz), 129.8, 128.2 (d,  $J_{\text{C-F}} = 8.1$  Hz), 127.5, 124.3, 115.0 (d,  $J_{\text{C-F}} = 21.2$  Hz), 84.1, 57.7, 55.9, 51.4, 33.5, 28.6, 21.6, 21.1.  $^{19}\text{F}$  NMR ( $\text{CDCl}_3$ , TMS, 564 MHz)  $\delta$  -113.9 IR (neat)  $\nu$  668, 810, 1039, 1092, 1232, 1334, 1506, 2841, 2930  $\text{cm}^{-1}$ . HRMS (ESI) calcd. for  $\text{C}_{20}\text{H}_{22}\text{NO}_3\text{S}_2\text{Cl}$  ( $\text{M}+\text{H}$ ) $^+$ : 436.1144, Found: 436.1139.

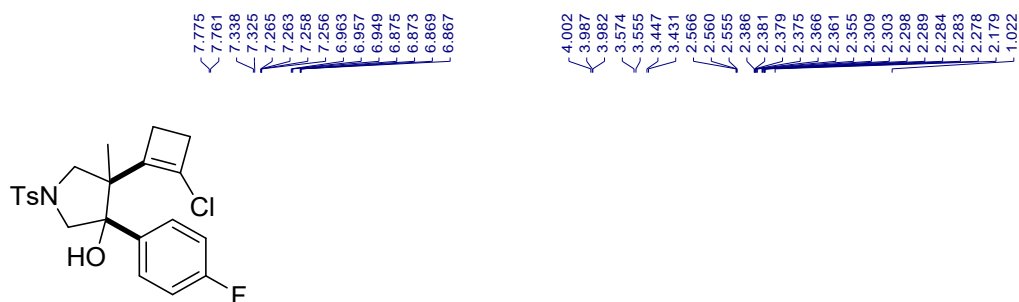

$^1\text{H}$  NMR ( $\text{CDCl}_3$ , 400 MHz, TMS)

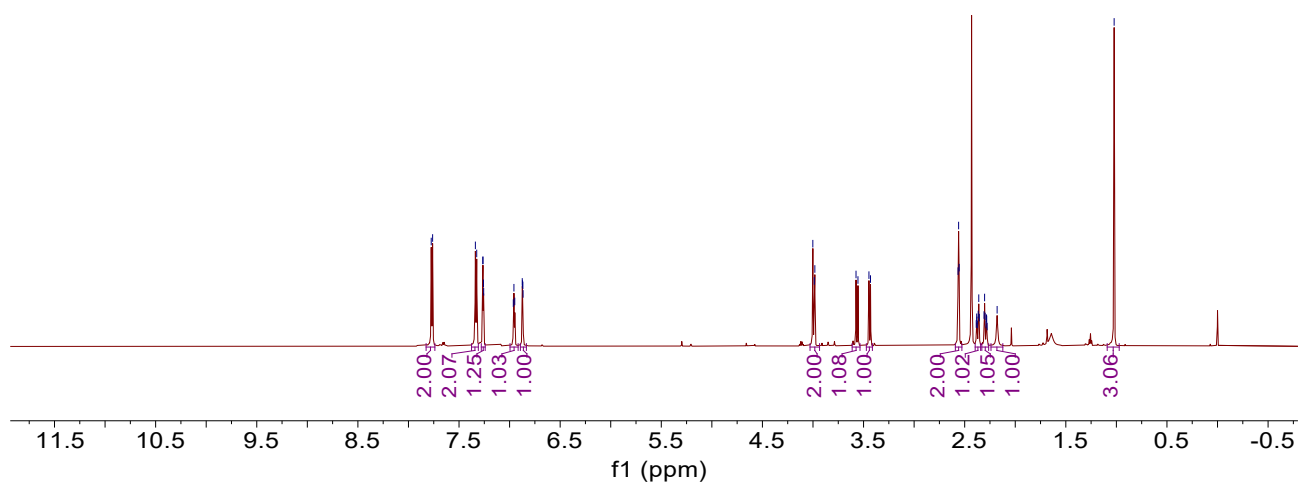

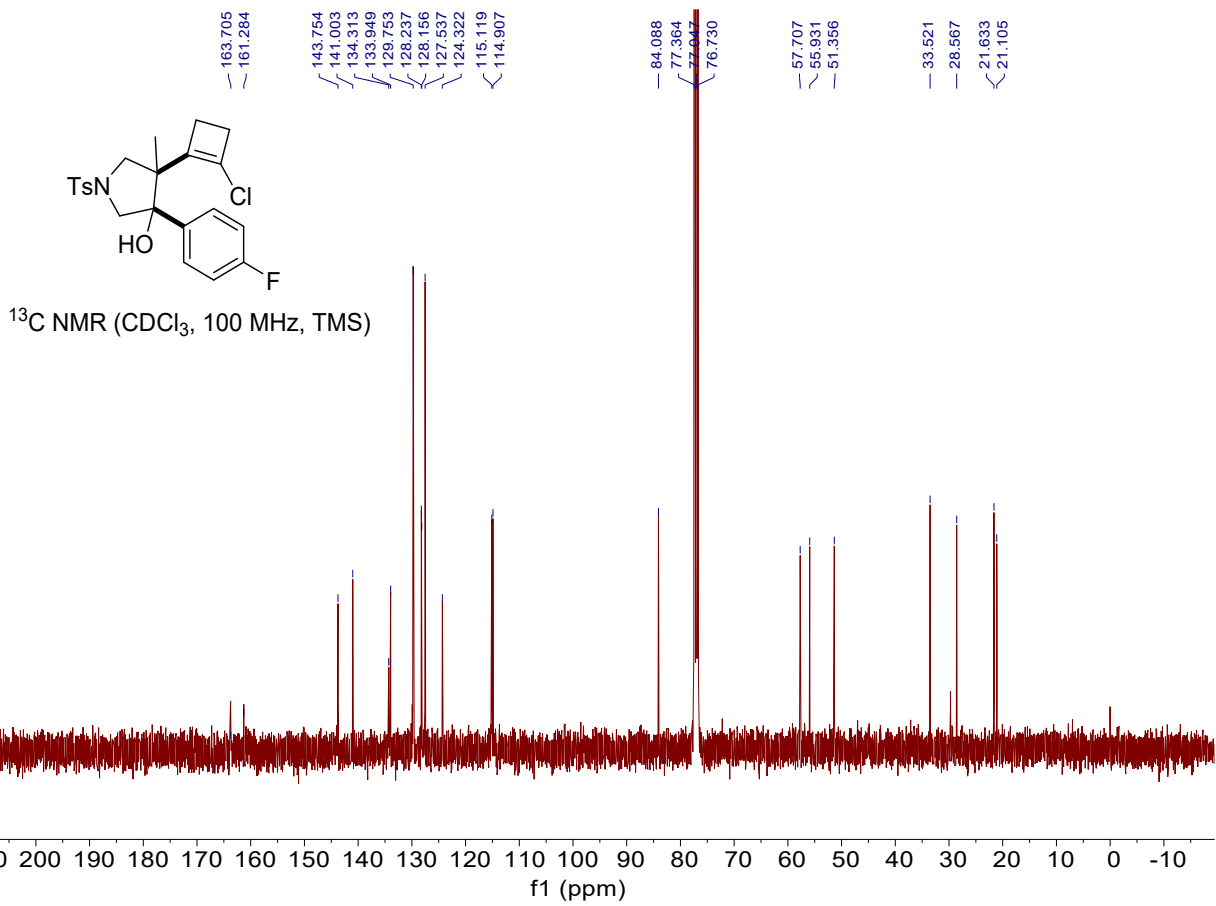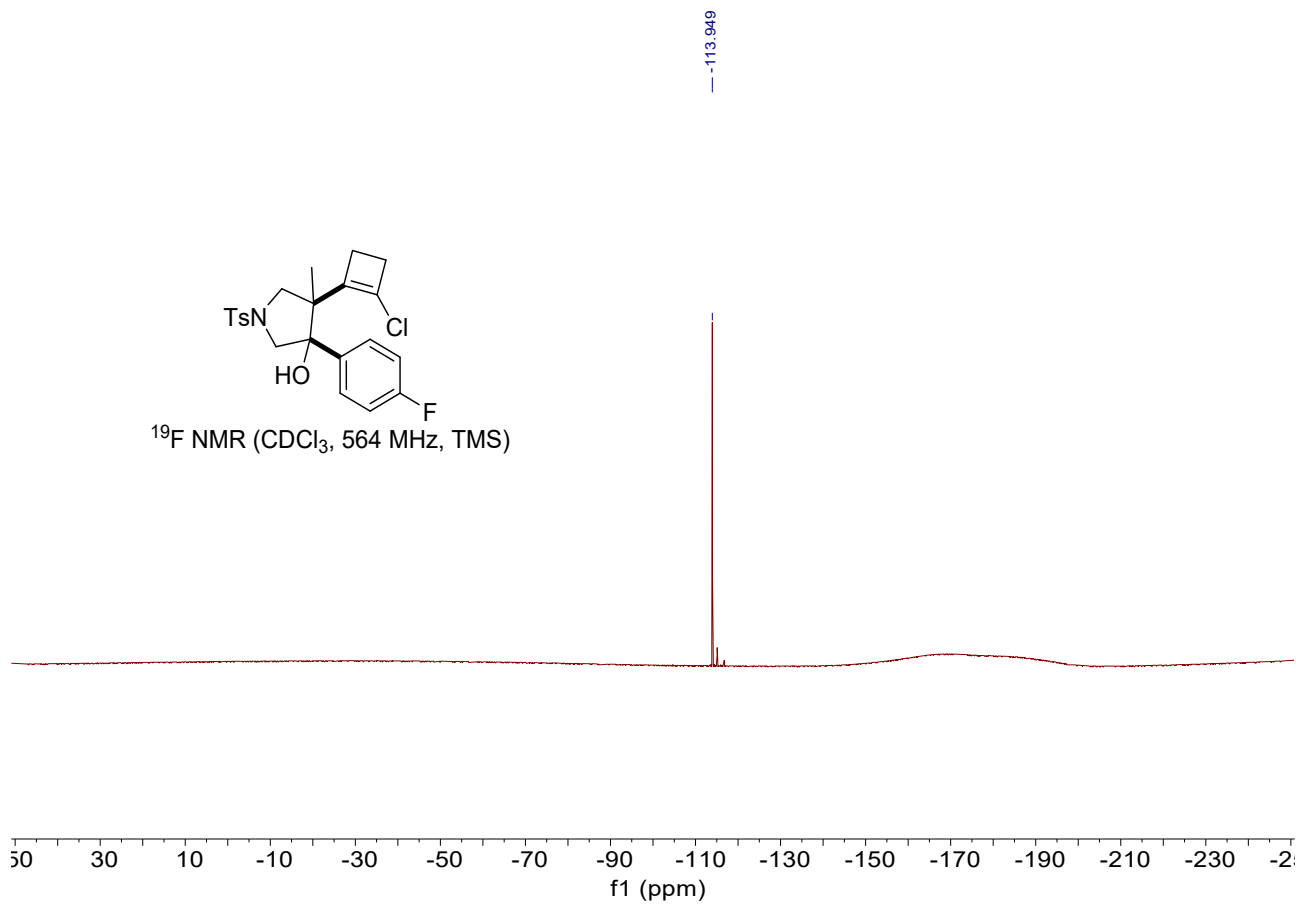

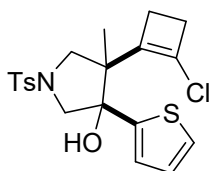

#### 4-(2-chlorocyclobut-1-en-1-yl)-4-methyl-3-(thiophen-2-yl)-1-tosylpyrrolidin-3-ol (14)

A colorless oil, 40% yield, 16.9 mg.  $^1\text{H}$  NMR ( $\text{CDCl}_3$ , TMS, 400 MHz)  $\delta$  7.77 (d,  $J = 8.4$  Hz, 2H), 7.33 (d,  $J = 8.4$  Hz, 2H), 7.28 – 7.24 (m, 1H), 7.00 – 6.92 (m, 1H), 6.87 (dd,  $J = 3.6, 1.2$  Hz, 1H), 4.03 – 3.94 (m, 2H), 3.56 (d,  $J = 11.6$  Hz, 1H), 3.44 (d,  $J = 9.2$  Hz, 1H), 2.56 (t,  $J = 3.2$  Hz, 2H), 2.37 (dt,  $J = 11.6, 3.2$  Hz, 1H), 2.29 (dt,  $J = 11.6, 3.6$  Hz, 1H), 2.18 (brs, 1H), 1.02 (s, 3H).  $^{13}\text{C}$  NMR ( $\text{CDCl}_3$ , TMS, 100 MHz)  $\delta$  143.7, 142.8, 140.6, 134.0, 129.7, 127.6, 126.9, 125.8, 125.0, 124.7, 83.5, 58.8, 55.7, 51.4, 33.6, 28.6, 21.6, 21.2. IR (neat)  $\nu$  668, 767, 1039, 1042, 1192, 1356, 1596, 2899, 2933  $\text{cm}^{-1}$ . HRMS (ESI) calcd. for  $\text{C}_{20}\text{H}_{22}\text{NO}_3\text{S}_2\text{ClNa}$  ( $\text{M}+\text{Na}$ ) $^+$ : 446.0622, Found: 446.0621.

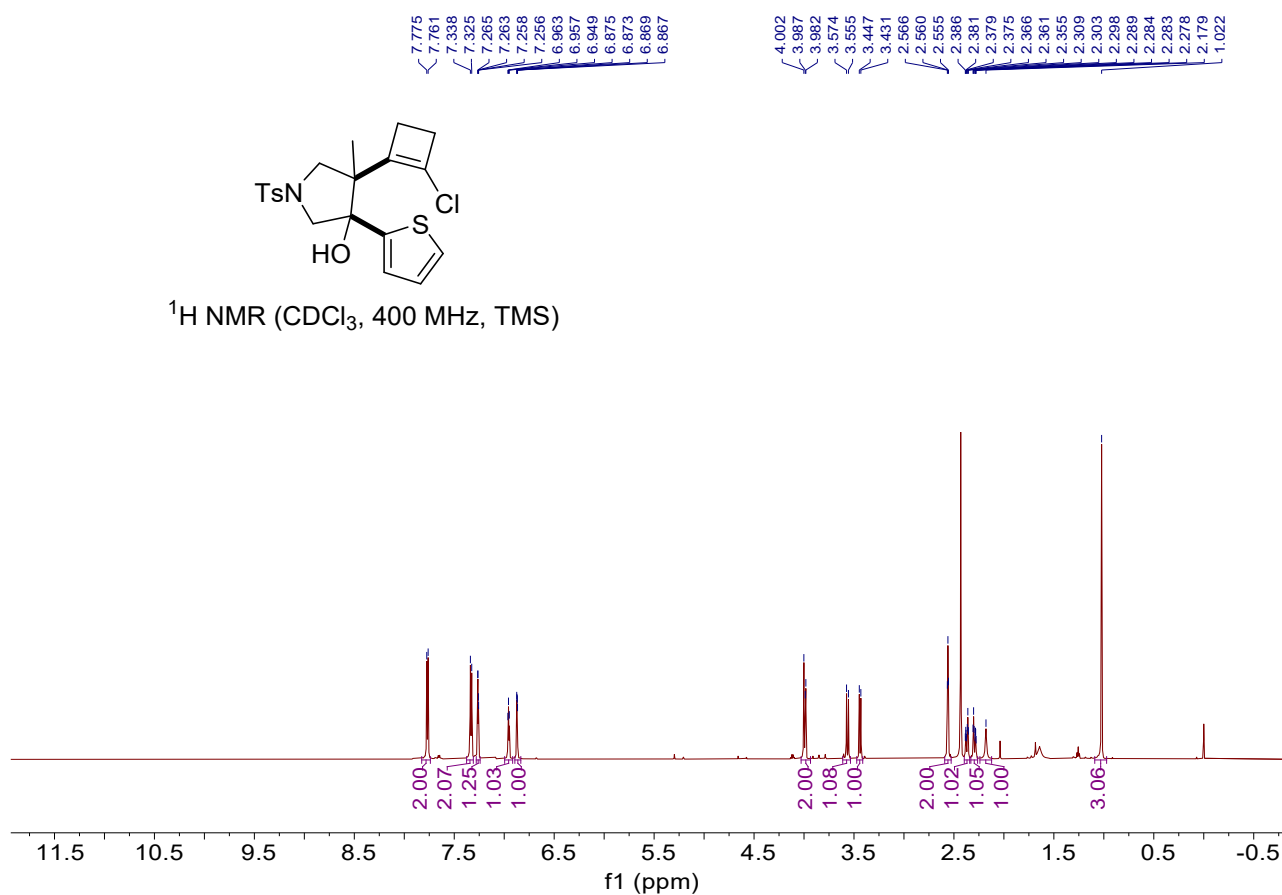

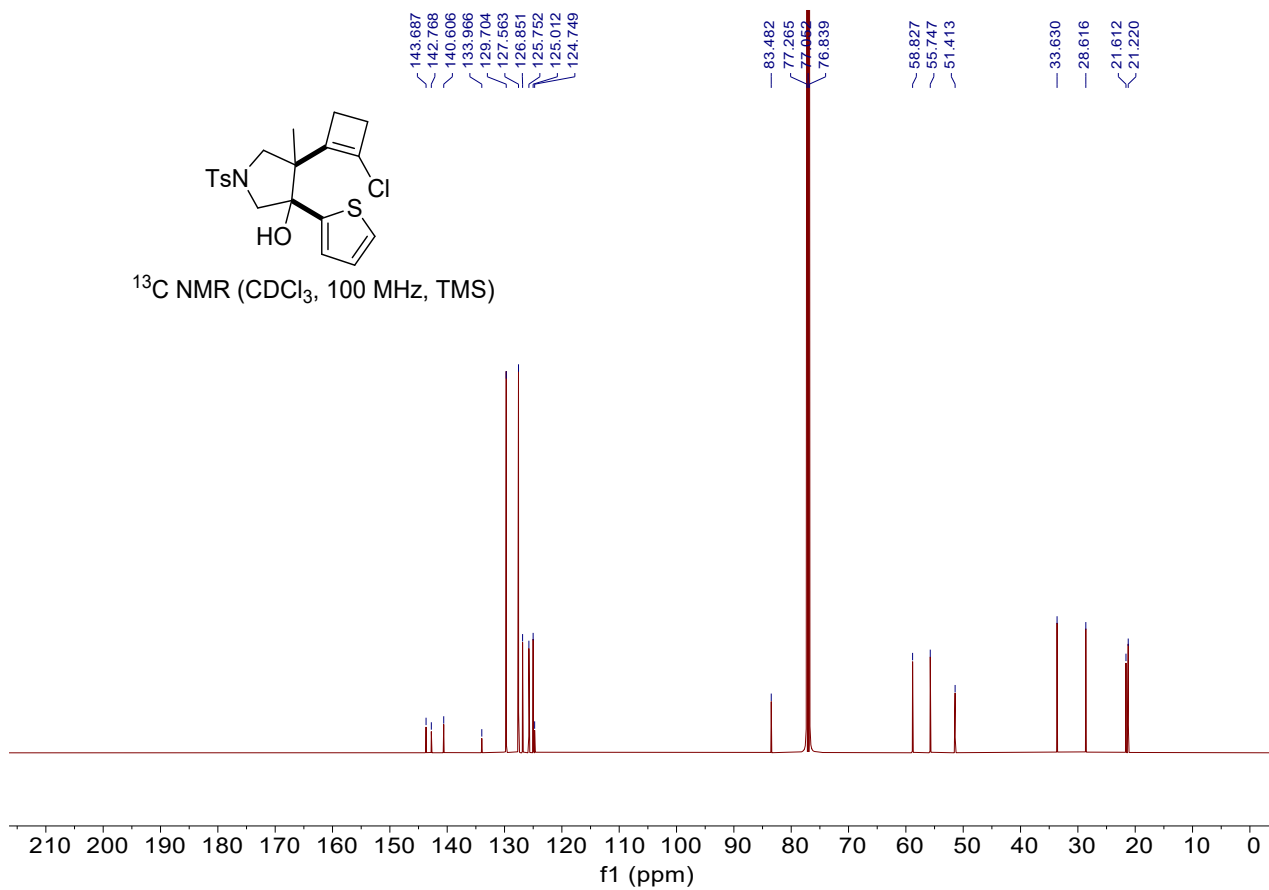



## 10. Computational studies

### 10.1 DFT calculations of proximal C-C bond cleavage.

All quantum mechanical calculations have been performed with Gaussian 16.<sup>[4]</sup> The geometries of all species have been optimized at B3LYP/6-31G(d)/Lanl2dz level. The subsequent frequency calculations on the stationary points were carried out at the same level of theory to ascertain the nature of the stationary points as minima on the respective potential energy surfaces. Thermochemical corrections to 298.15 K have been calculated for all minima from unscaled vibrational frequencies obtained at this same level. The thermochemical corrections have been combined with single-point energies calculated at the SMD(toluene)/B3LYP/6-311+G(d,p)/Lanl2dz//B3LYP/6-31G(d)/Lanl2dz level to yield free energy  $G_{298}$  at 298.15 K. The solvent effect was estimated by the IEFPCM method with radii and nonelectrostatic terms for SMD salvation model in toluene ( $\epsilon = 2.3741$ ).

**Table S4.** The total energies, enthalpies and free energies of all species in toluene shown in Schemes S1 & S2 & Scheme 7a

|                 | $E_{\text{tot}}$ | $H_{298}$    | $G_{298}$    |
|-----------------|------------------|--------------|--------------|
| <b>2-Int1</b>   | -2279.787277     | -2279.917073 | -2280.556690 |
| <b>2-Ts1</b>    | -2279.754786     | -2279.882268 | -2280.522494 |
| <b>2-Ts1'</b>   | -2279.722047     | -2279.843055 | -2280.489357 |
| <b>2-Int2</b>   | -2279.781835     | -2279.905456 | -2280.551696 |
| <b>2-Int2''</b> | -2279.764780     | -2279.885805 | -2280.535000 |
| <b>2-Ts2</b>    | -2279.765803     | -2279.884554 | -2280.534763 |
| <b>2-Ts2'</b>   | -2279.753803     | -2279.871081 | -2280.522647 |
| <b>2-Ts2''</b>  | -2279.703396     | -2279.830765 | -2280.467525 |
| <b>2-Int3</b>   | -2279.776141     | -2279.894637 | -2280.547360 |
| <b>2-Int3''</b> | -2279.766920     | -2279.896828 | -2280.531604 |
| <b>2-Ts3</b>    | -2279.758423     | -2279.879797 | -2280.522665 |
| <b>2-Ts3''</b>  | -2279.753001     | -2279.875682 | -2280.518514 |
| <b>2-Int4</b>   | -2279.758772     | -2279.887644 | -2280.525212 |
| <b>2-Int4''</b> | -2279.765497     | -2279.897132 | -2280.530848 |
| <b>2-Ts4</b>    | -2279.751243     | -2279.874953 | -2280.514939 |
| <b>2-Int5</b>   | -2279.795379     | -2279.914305 | -2280.565817 |
| <b>2-Int5''</b> | -2279.772338     | -2279.897992 | -2280.538573 |
| <b>2-TS5</b>    | -2279.774145     | -2279.892923 | -2280.542442 |
| <b>2-Int6</b>   | -2279.830847     | -2279.955917 | -2280.602512 |

## 10.2 DFT calculations of distal C-C bond cleavage.

All quantum mechanical calculations have been performed with Gaussian 16. The geometries of all species have been optimized at  $\omega$ B97X-D/6-31G(d)/Lanl2dz level. The subsequent frequency calculations on the stationary points were carried out at the same level of theory to ascertain the nature of the stationary points as minima on the respective potential energy surfaces. Thermochemical corrections to 298.15 K have been calculated for all minima from unscaled vibrational frequencies obtained at this same level. The thermochemical corrections have been combined with single-point energies calculated at the SMD(toluene)/ $\omega$ B97X-D/6-311+G(d,p)/Lanl2dz// $\omega$ B97X-D/6-31G(d)/Lanl2dz level to yield free energy  $G_{298}$  at 298.15 K. The solvent effect was estimated by the IEFPCM method with radii and nonelectrostatic terms for SMD salvation model in toluene ( $\epsilon = 2.3741$ ).

**Table S5.** The total energies, enthalpies and free energies of all species in toluene shown in **Scheme 7b**

|                            | $E_{\text{tot}}$ | $H_{298}$    | $G_{298}$    |
|----------------------------|------------------|--------------|--------------|
| <b>1a</b>                  | -1338.596349     | -1338.217969 | -1338.298770 |
| <b>Pd</b>                  | -1600.000258     | -1599.280868 | -1599.381149 |
| <b>3-Int1-a</b>            | -2938.604443     | -2937.503807 | -2937.664189 |
| <b>3-Ts1-a</b>             | -2938.606983     | -2937.508634 | -2937.660200 |
| <b>3-Int2-a</b>            | -2938.632893     | -2937.532573 | -2937.684914 |
| <b>3-Ts2-a</b>             | -2938.581311     | -2937.482359 | -2937.635790 |
| <b>3-Int3-a</b>            | -2938.624503     | -2937.523519 | -2937.679753 |
| <b>3-Ts3-a</b>             | -2938.595560     | -2937.495434 | -2937.640581 |
| <b>3-Int4</b>              | -2938.653535     | -2937.550349 | -2937.698454 |
| <b>3-Ts4</b>               | -2938.62696      | -2937.525973 | -2937.672988 |
| <b>3+PdL</b>               | -2938.690222     | -2937.586547 | -2937.740068 |
| <b>1a+ZnCl<sub>2</sub></b> | -2324.612067     | -2324.223978 | -2324.317312 |
| <b>3-Int1-b</b>            | -3924.637201     | -3923.527787 | -3923.700862 |
| <b>3-Ts1-b</b>             | -3924.636696     | -3923.529061 | -3923.696093 |
| <b>3-Int2-b</b>            | -3924.665652     | -3923.556361 | -3923.723694 |
| <b>3-Ts2-b</b>             | -3924.612247     | -3923.503978 | -3923.672031 |
| <b>3-Int3-b</b>            | -3924.658858     | -3923.549119 | -3923.719918 |
| <b>3-Ts3-b</b>             | -3924.630202     | -3923.521235 | -3923.683495 |
| <b>3-Int1'</b>             | -2938.568733     | -2937.469431 | -2937.639441 |
| <b>3-Ts1'</b>              | -2938.564112     | -2937.466122 | -2937.629710 |
| <b>3-Int2'</b>             | -2938.595629     | -2937.495439 | -2937.647003 |
| <b>3-Ts2'</b>              | -2938.543815     | -2937.445669 | -2937.601274 |

|                |              |              |              |
|----------------|--------------|--------------|--------------|
| <b>3-Int3'</b> | -2938.600183 | -2937.499586 | -2937.658239 |
| <b>3-Ts3'</b>  | -2938.565605 | -2937.467803 | -2937.619657 |
| <b>3-Int4'</b> | -2938.63036  | -2937.527644 | -2937.680249 |
| <b>3-Ts4'</b>  | -2938.596441 | -2937.495604 | -2937.649678 |
| <b>3+PdL'</b>  | -2938.667115 | -2937.563082 | -2937.715840 |

## Archive entries

|                                                            |             |             |             |    |             |             |             |
|------------------------------------------------------------|-------------|-------------|-------------|----|-------------|-------------|-------------|
| <b>2-Int1</b>                                              |             |             |             | C  | 8.02929600  | 1.46059900  | -0.68026400 |
| Zero-point correction= 0.723023 (Hartree/Particle)         |             |             |             | H  | 7.24724300  | 1.91977500  | -2.63645400 |
| Thermal correction to Energy= 0.768470                     |             |             |             | H  | 8.57716100  | 0.72219600  | 1.27015200  |
| Thermal correction to Enthalpy= 0.769414                   |             |             |             | C  | 9.12927300  | 2.49383500  | -0.73780600 |
| Thermal correction to Gibbs Free Energy= 0.639617          |             |             |             | H  | 9.45038500  | 2.68094500  | -1.76768100 |
| Sum of electronic and zero-point Energies= -2279.833667    |             |             |             | H  | 8.79010600  | 3.45237200  | -0.32269800 |
| Sum of electronic and thermal Energies= -2279.788221       |             |             |             | H  | 10.00444000 | 2.18066400  | -0.15916700 |
| Sum of electronic and thermal Enthalpies= -2279.787277     |             |             |             | C  | 1.56018300  | -2.42943800 | 2.09955700  |
| Sum of electronic and thermal Free Energies= -2279.917073  |             |             |             | H  | 0.89658400  | -2.32312800 | 1.23415800  |
| HF(B3LYP/6-311+G(d,p)/Lanl2dz, SMD[toluene])= -2281.062436 |             |             |             | H  | 2.36505500  | -3.11308000 | 1.81039900  |
| N                                                          | 3.28362700  | -0.78622400 | 0.25679100  | H  | 0.98579900  | -2.83320300 | 2.93655400  |
| C                                                          | 3.32311100  | -0.54991700 | 1.69956000  | C  | 0.65570700  | -1.22229800 | -1.49659700 |
| H                                                          | 4.18024500  | -1.08926500 | 2.11729700  | H  | 0.89552400  | -1.02600500 | -2.55131800 |
| H                                                          | 3.44197900  | 0.51711100  | 1.92719400  | H  | 1.20576900  | -2.13044200 | -1.22058200 |
| C                                                          | 2.10062500  | -1.06790300 | 2.47462000  | H  | -0.41709700 | -1.41304300 | -1.41711500 |
| C                                                          | 2.55455100  | 0.22038900  | -0.55367100 | Pd | -1.89772000 | 0.76144600  | 0.16422400  |
| H                                                          | 2.97026800  | 0.19158700  | -1.56496100 | P  | -4.15221300 | -0.02876100 | -0.27187900 |
| H                                                          | 2.74234300  | 1.21611100  | -0.13298500 | C  | -4.61887200 | 0.20248900  | -2.14698000 |
| C                                                          | 1.06101700  | -0.05650600 | -0.62878100 | C  | -3.40296500 | -0.24775800 | -2.99352000 |
| C                                                          | 0.21404500  | 0.73473900  | 0.02459300  | H  | -2.49489700 | 0.28091800  | -2.68515700 |
| C                                                          | -0.13763300 | 1.77389400  | 0.81949400  | H  | -3.20668200 | -1.31867500 | -2.93617500 |
| C                                                          | 0.07885800  | 2.32930000  | 2.18597500  | H  | -3.60016700 | -0.00786900 | -4.04722100 |
| C                                                          | 0.03173700  | 3.24965200  | 0.96909700  | C  | -4.79300200 | 1.70824200  | -2.44486900 |
| H                                                          | 1.03041700  | 2.12375900  | 2.67125900  | H  | -4.86297700 | 1.84090300  | -3.53246000 |
| H                                                          | -0.76677600 | 2.36549800  | 2.86918500  | H  | -5.70372100 | 2.12873400  | -2.01232200 |
| H                                                          | -0.83914000 | 3.89232800  | 0.85965600  | H  | -3.93348400 | 2.29054800  | -2.09651200 |
| H                                                          | 0.96028300  | 3.69372800  | 0.61142300  | C  | -5.87947800 | -0.54263500 | -2.62898300 |
| S                                                          | 4.59279500  | -1.58966400 | -0.44662000 | H  | -6.77556300 | -0.26185200 | -2.06923500 |
| O                                                          | 4.98301600  | -2.62995300 | 0.51205400  | H  | -6.06091700 | -0.29352100 | -3.68354300 |
| O                                                          | 4.18568000  | -1.90917700 | -1.81710600 | H  | -5.77093700 | -1.62875200 | -2.57283100 |
| C                                                          | 5.95311300  | -0.42032100 | -0.55009700 | C  | -5.37676400 | 1.02616700  | 0.81439900  |
| C                                                          | 6.09535900  | 0.37571100  | -1.68992800 | C  | -4.36140300 | -1.90599000 | 0.20006300  |
| C                                                          | 6.84704600  | -0.30105600 | 0.51759300  | C  | -6.86303300 | 0.96628500  | 0.40859700  |
| C                                                          | 7.12990500  | 1.30783700  | -1.74541200 | H  | -7.45185500 | 1.56108600  | 1.12042200  |
| H                                                          | 5.42351800  | 0.24159300  | -2.53085900 | H  | -7.04363900 | 1.38657200  | -0.58399300 |
| C                                                          | 7.87532500  | 0.63667600  | 0.44413900  | H  | -7.26346700 | -0.05065900 | 0.42486000  |
| H                                                          | 6.75564600  | -0.95685400 | 1.37671200  | C  | -4.89832400 | 2.49875600  | 0.77354600  |

|                                                            |             |             |             |    |             |             |             |
|------------------------------------------------------------|-------------|-------------|-------------|----|-------------|-------------|-------------|
| H                                                          | -5.50753000 | 3.08650300  | 1.47375000  | H  | -1.05428600 | -4.26568000 | -3.25192600 |
| H                                                          | -3.85006200 | 2.57991700  | 1.08320500  | H  | -1.62998400 | -2.68194600 | -3.93504800 |
| H                                                          | -4.99363900 | 2.96014100  | -0.20933900 | S  | 4.55868900  | -0.82033500 | 0.81460500  |
| C                                                          | -5.25369000 | 0.59257800  | 2.29227700  | O  | 4.67547100  | -0.43920900 | 2.22625700  |
| H                                                          | -4.21175500 | 0.58690900  | 2.62870600  | O  | 5.37940000  | -1.88414300 | 0.23078400  |
| H                                                          | -5.79836500 | 1.31662300  | 2.91243800  | C  | 4.80801700  | 0.66668300  | -0.15850200 |
| H                                                          | -5.69059600 | -0.38888600 | 2.48868100  | C  | 5.22173400  | 0.56062500  | -1.48970700 |
| C                                                          | -5.81219300 | -2.39859000 | 0.37248800  | C  | 4.56131600  | 1.91669300  | 0.41688400  |
| H                                                          | -5.80064700 | -3.47618900 | 0.58616600  | C  | 5.37978900  | 1.71919900  | -2.24677000 |
| H                                                          | -6.32235900 | -1.91395900 | 1.20862700  | H  | 5.43788800  | -0.41421900 | -1.91366200 |
| H                                                          | -6.41691500 | -2.25107600 | -0.52609400 | C  | 4.72398300  | 3.06438600  | -0.35816700 |
| C                                                          | -3.57672400 | -2.15561200 | 1.51122900  | H  | 4.26608300  | 1.98533600  | 1.45854300  |
| H                                                          | -4.01631300 | -1.66420400 | 2.37938500  | C  | 5.13382100  | 2.98632600  | -1.69652600 |
| H                                                          | -3.56852500 | -3.23482200 | 1.71567300  | H  | 5.70633100  | 1.63923200  | -3.28081600 |
| H                                                          | -2.54065400 | -1.81305600 | 1.42087700  | H  | 4.53464700  | 4.03762700  | 0.08781100  |
| C                                                          | -3.67335800 | -2.78261500 | -0.86989800 | C  | 5.34007900  | 4.23675400  | -2.51802200 |
| H                                                          | -2.64120800 | -2.46708400 | -1.05255300 | H  | 4.72712300  | 5.06510100  | -2.14858000 |
| H                                                          | -3.64061200 | -3.81637100 | -0.50192000 | H  | 6.38798400  | 4.56276100  | -2.47979500 |
| H                                                          | -4.20904100 | -2.79836700 | -1.82159900 | H  | 5.09055900  | 4.07027200  | -3.57129400 |
| O                                                          | 1.66063800  | -0.40863400 | 3.39726600  | C  | 1.99815100  | -1.63206000 | 3.47211400  |
| <b>2-Ts1</b>                                               |             |             |             | H  | 1.42874700  | -2.44874900 | 3.01228800  |
| Zero-point correction= 0.721711 (Hartree/Particle)         |             |             |             | H  | 3.05424800  | -1.91592700 | 3.45320100  |
| Thermal correction to Energy= 0.766764                     |             |             |             | H  | 1.67255800  | -1.48253800 | 4.50369000  |
| Thermal correction to Enthalpy= 0.767708                   |             |             |             | C  | 1.79107200  | -4.13157600 | 0.10654700  |
| Thermal correction to Gibbs Free Energy= 0.640226          |             |             |             | H  | 2.60992400  | -4.67632900 | -0.38368400 |
| Sum of electronic and zero-point Energies= -2279.800783    |             |             |             | H  | 2.12729600  | -3.90951400 | 1.12623700  |
| Sum of electronic and thermal Energies= -2279.755730       |             |             |             | H  | 0.92151800  | -4.79213700 | 0.16008600  |
| Sum of electronic and thermal Enthalpies= -2279.754786     |             |             |             | Pd | -2.00080100 | -1.08715600 | -0.92786400 |
| Sum of electronic and thermal Free Energies= -2279.882268  |             |             |             | P  | -3.13708100 | 0.74022600  | 0.15060800  |
| HF(B3LYP/6-311+G(d,p)/Lanl2dz, SMD[toluene])= -2281.027408 |             |             |             | C  | -3.42385300 | 0.36473600  | 2.04105000  |
| N                                                          | 2.93882900  | -1.29068700 | 0.60526700  | C  | -2.13614800 | -0.29504600 | 2.59133400  |
| C                                                          | 1.94520900  | -0.37289100 | 1.17330400  | H  | -1.85508600 | -1.16199700 | 1.98270900  |
| H                                                          | 2.07547500  | 0.66281500  | 0.83070500  | H  | -1.28240800 | 0.38074600  | 2.64014200  |
| H                                                          | 0.97423000  | -0.71583600 | 0.79128200  | H  | -2.33008800 | -0.64345300 | 3.61490400  |
| C                                                          | 1.80303500  | -0.34780800 | 2.69994700  | C  | -4.53132900 | -0.70299400 | 2.18332200  |
| C                                                          | 2.58462300  | -1.82773400 | -0.73591200 | H  | -4.54688500 | -1.05094500 | 3.22444900  |
| H                                                          | 3.48556000  | -2.31081000 | -1.12524500 | H  | -5.52915000 | -0.31793800 | 1.96035800  |
| H                                                          | 2.29771100  | -1.01475700 | -1.41642800 | H  | -4.33813300 | -1.57310500 | 1.54701200  |
| C                                                          | 1.47198900  | -2.85438500 | -0.64642600 | C  | -3.79199700 | 1.57052700  | 2.92914500  |
| C                                                          | 0.31132500  | -2.66423600 | -1.24970000 | H  | -4.70386400 | 2.07533900  | 2.60006200  |
| C                                                          | -0.80885400 | -2.53193500 | -1.90915800 | H  | -3.96610200 | 1.21729200  | 3.95476500  |
| C                                                          | -2.46897800 | -3.08151300 | -1.94641700 | H  | -2.99159300 | 2.31245700  | 2.98135100  |
| C                                                          | -1.42426000 | -3.26228700 | -3.03376900 | C  | -4.87534800 | 1.05473500  | -0.68224800 |
| H                                                          | -3.38099000 | -2.55445800 | -2.22819900 | C  | -2.09764900 | 2.38302700  | -0.00154800 |
| H                                                          | -2.61659800 | -3.90005400 | -1.24914000 | C  | -5.85365300 | 1.94080000  | 0.11596600  |
|                                                            |             |             |             | H  | -6.76096800 | 2.10022600  | -0.48303000 |

|                                                            |             |             |             |    |             |             |             |
|------------------------------------------------------------|-------------|-------------|-------------|----|-------------|-------------|-------------|
| H                                                          | -6.16900500 | 1.47365600  | 1.05244900  | C  | 0.69630500  | 1.25302600  | -3.47951100 |
| H                                                          | -5.44107900 | 2.92477100  | 0.34998900  | H  | 2.10432000  | -0.46022200 | -3.27423300 |
| C                                                          | -5.55110400 | -0.31124700 | -0.94912100 | H  | 2.88469600  | 1.16329800  | -3.13953100 |
| H                                                          | -6.48895800 | -0.13810500 | -1.49437400 | H  | 0.87996900  | 2.14457300  | -4.09598900 |
| H                                                          | -4.91146300 | -0.94858400 | -1.56615200 | H  | 0.06063700  | 0.57245000  | -4.06355600 |
| H                                                          | -5.79767600 | -0.86129200 | -0.04115900 | S  | -4.54350500 | 0.76468700  | 1.25835700  |
| C                                                          | -4.66200200 | 1.68602800  | -2.07594000 | O  | -4.14711100 | 0.42498400  | 2.63168700  |
| H                                                          | -3.94447900 | 1.11243500  | -2.67237100 | O  | -5.56305900 | 1.77700900  | 0.97573200  |
| H                                                          | -5.61997400 | 1.68040500  | -2.61268200 | C  | -5.05931600 | -0.75971800 | 0.46014700  |
| H                                                          | -4.32735100 | 2.72440200  | -2.02959300 | C  | -5.84987800 | -0.70195100 | -0.69136900 |
| C                                                          | -2.85297000 | 3.70074000  | 0.26508500  | C  | -4.64903600 | -1.98929000 | 0.98124700  |
| H                                                          | -2.14167600 | 4.53604400  | 0.20538900  | C  | -6.21403900 | -1.88663100 | -1.32777000 |
| H                                                          | -3.63544300 | 3.89649000  | -0.47229400 | H  | -6.19648900 | 0.25645200  | -1.06284600 |
| H                                                          | -3.30622300 | 3.73163600  | 1.25934600  | C  | -5.02430000 | -3.16424700 | 0.33159800  |
| C                                                          | -1.49074600 | 2.42408600  | -1.42571600 | H  | -4.07270700 | -2.02117800 | 1.89960300  |
| H                                                          | -0.80078900 | 3.27660300  | -1.49069700 | C  | -5.80286600 | -3.13362100 | -0.83399200 |
| H                                                          | -0.92616200 | 1.50972100  | -1.63909200 | H  | -6.83686500 | -1.84268700 | -2.21791600 |
| H                                                          | -2.23562000 | 2.54644800  | -2.21251300 | H  | -4.71541800 | -4.12203400 | 0.74323200  |
| C                                                          | -0.89443200 | 2.31492300  | 0.96252200  | C  | -6.17988900 | -4.40965600 | -1.54844400 |
| H                                                          | -0.32719300 | 1.38914200  | 0.84258200  | H  | -7.16182800 | -4.32664200 | -2.02601100 |
| H                                                          | -0.21553900 | 3.14675200  | 0.73294300  | H  | -5.45377300 | -4.64741900 | -2.33730200 |
| H                                                          | -1.17183700 | 2.41201000  | 2.01343700  | H  | -6.20580100 | -5.26163600 | -0.86143600 |
| O                                                          | 1.44088500  | 0.68926200  | 3.22579000  | C  | -1.18907400 | 2.51684500  | 2.34602700  |
| <b>2-Int2</b>                                              |             |             |             | H  | -1.65931100 | 3.36757600  | 1.84096300  |
| Zero-point correction= 0.724491 (Hartree/Particle)         |             |             |             | H  | -1.93545500 | 2.11341000  | 3.03852700  |
| Thermal correction to Energy= 0.768916                     |             |             |             | H  | -0.30222000 | 2.86502500  | 2.87985700  |
| Thermal correction to Enthalpy= 0.769861                   |             |             |             | C  | -2.25608300 | 4.18334800  | -0.91614300 |
| Thermal correction to Gibbs Free Energy= 0.646240          |             |             |             | H  | -2.98286700 | 4.65626600  | -1.59290000 |
| Sum of electronic and zero-point Energies= -2279.827205    |             |             |             | H  | -2.64078000 | 4.33471400  | 0.10247400  |
| Sum of electronic and thermal Energies= -2279.782780       |             |             |             | H  | -1.30859200 | 4.72149500  | -1.01208500 |
| Sum of electronic and thermal Enthalpies= -2279.781835     |             |             |             | Pd | 1.50788100  | 0.66624100  | -0.96261600 |
| Sum of electronic and thermal Free Energies= -2279.905456  |             |             |             | P  | 3.41843900  | -0.56360600 | 0.21983300  |
| HF(B3LYP/6-311+G(d,p)/LanL2dz, SMD[toluene])= -2281.051946 |             |             |             | C  | 4.49039100  | 0.72022800  | 1.21993800  |
| N                                                          | -3.13399300 | 1.28753600  | 0.48721500  | C  | 3.53117200  | 1.78879300  | 1.79555100  |
| C                                                          | -1.89216100 | 0.56785400  | 0.78397700  | H  | 2.94501900  | 2.26493000  | 1.00404000  |
| H                                                          | -2.08632400 | -0.15931400 | 1.58126700  | H  | 2.83082500  | 1.39422600  | 2.53080500  |
| H                                                          | -1.51174600 | 0.03645000  | -0.09496800 | H  | 4.13145200  | 2.56400900  | 2.29122200  |
| C                                                          | -0.79442700 | 1.48206000  | 1.32363200  | C  | 5.42552000  | 1.47836800  | 0.25136700  |
| C                                                          | -3.24883600 | 1.79378700  | -0.91250000 | H  | 5.85125000  | 2.33846900  | 0.78456800  |
| H                                                          | -4.19941800 | 2.32840100  | -0.97520000 | H  | 6.26491200  | 0.87003600  | -0.09357800 |
| H                                                          | -3.27061200 | 0.94343200  | -1.60773400 | H  | 4.88685000  | 1.86660000  | -0.61916200 |
| C                                                          | -2.08439100 | 2.71241900  | -1.23164300 | C  | 5.34949400  | 0.14213900  | 2.36334000  |
| C                                                          | -0.97630300 | 2.18973400  | -1.74774800 | H  | 6.05946400  | -0.61319200 | 2.01861300  |
| C                                                          | 0.09005600  | 1.57863000  | -2.13908700 | H  | 5.93265400  | 0.95691400  | 2.81433200  |
| C                                                          | 1.97652300  | 0.58131200  | -2.97031700 | H  | 4.74798100  | -0.29781000 | 3.16204700  |
|                                                            |             |             |             | C  | 4.62809800  | -1.60234500 | -0.91129800 |

|                                                            |             |             |             |    |             |             |             |
|------------------------------------------------------------|-------------|-------------|-------------|----|-------------|-------------|-------------|
| C                                                          | 2.61006300  | -1.81299900 | 1.49238500  | C  | -1.17261500 | -1.39105300 | 2.13850400  |
| C                                                          | 5.91848500  | -2.10644400 | -0.22971500 | C  | -0.35644400 | -0.53683500 | 2.53657000  |
| H                                                          | 6.45852600  | -2.75226600 | -0.93586500 | C  | 1.25258400  | 1.17959800  | 2.52833500  |
| H                                                          | 6.59331900  | -1.28556200 | 0.02748800  | C  | 0.27533500  | 0.45497700  | 3.45693400  |
| H                                                          | 5.73605200  | -2.69222700 | 0.67244400  | H  | 0.85700100  | 2.13510400  | 2.17640300  |
| C                                                          | 5.05075700  | -0.76302400 | -2.14080700 | H  | 2.25912600  | 1.30029300  | 2.92863500  |
| H                                                          | 5.69757500  | -1.38722600 | -2.77246100 | H  | 0.79511600  | -0.07537800 | 4.26504000  |
| H                                                          | 4.19388900  | -0.46270100 | -2.74081600 | H  | -0.47364700 | 1.11181600  | 3.92250800  |
| H                                                          | 5.61787300  | 0.13115200  | -1.88554500 | S  | -4.42663700 | -0.87503900 | -1.30248800 |
| C                                                          | 3.85738400  | -2.81443200 | -1.48275500 | O  | -4.07947300 | -0.79712700 | -2.72437300 |
| H                                                          | 2.90885900  | -2.51380600 | -1.93937000 | O  | -5.61659100 | -1.58728500 | -0.82870100 |
| H                                                          | 4.46949900  | -3.27870300 | -2.26715500 | C  | -4.53618500 | 0.81031900  | -0.68705400 |
| H                                                          | 3.65540800  | -3.58604900 | -0.73709900 | C  | -5.34266500 | 1.09346100  | 0.41828800  |
| C                                                          | 3.53160500  | -2.91147600 | 2.06079000  | C  | -3.78412500 | 1.81963600  | -1.29554200 |
| H                                                          | 2.96363800  | -3.50139400 | 2.79340200  | C  | -5.38523300 | 2.39491500  | 0.91732400  |
| H                                                          | 3.88544700  | -3.60881300 | 1.29845900  | H  | -5.94387600 | 0.30622200  | 0.86034600  |
| H                                                          | 4.40146800  | -2.50082900 | 2.58057600  | C  | -3.83881200 | 3.11454700  | -0.78345800 |
| C                                                          | 1.41039800  | -2.48033500 | 0.77551700  | H  | -3.18633000 | 1.59323200  | -2.17210000 |
| H                                                          | 0.88102100  | -3.12165400 | 1.49369400  | C  | -4.63663000 | 3.42343600  | 0.32849600  |
| H                                                          | 0.70642000  | -1.72926100 | 0.40302100  | H  | -6.01618300 | 2.61628500  | 1.77487200  |
| H                                                          | 1.70335100  | -3.10728400 | -0.06757400 | H  | -3.25883200 | 3.90131700  | -1.26023600 |
| C                                                          | 2.01207200  | -1.04562900 | 2.69312300  | C  | -4.71600400 | 4.83763500  | 0.85359000  |
| H                                                          | 1.35586700  | -0.23349500 | 2.37750200  | H  | -4.95220100 | 4.85598400  | 1.92257800  |
| H                                                          | 1.41224600  | -1.75082500 | 3.28435800  | H  | -3.77359000 | 5.37490600  | 0.70338700  |
| H                                                          | 2.77439900  | -0.64012900 | 3.36183400  | H  | -5.50053900 | 5.40607300  | 0.33640000  |
| O                                                          | 0.38440200  | 1.31466400  | 1.01525700  | C  | -1.00551200 | -3.62832300 | -0.96099700 |
| <b>2-Ts2</b>                                               |             |             |             | H  | -2.05789900 | -3.91159300 | -1.03649400 |
| Zero-point correction= 0.725139 (Hartree/Particle)         |             |             |             | H  | -0.58664400 | -3.60504500 | -1.97611900 |
| Thermal correction to Energy= 0.768017                     |             |             |             | H  | -0.45512000 | -4.38245500 | -0.39306100 |
| Thermal correction to Enthalpy= 0.768961                   |             |             |             | C  | -1.80216600 | -3.77886700 | 1.97364400  |
| Thermal correction to Gibbs Free Energy= 0.650209          |             |             |             | H  | -2.32040300 | -3.87669100 | 2.93727300  |
| Sum of electronic and zero-point Energies= -2279.809625    |             |             |             | H  | -2.26212900 | -4.49099600 | 1.28178700  |
| Sum of electronic and thermal Energies= -2279.766747       |             |             |             | H  | -0.75819100 | -4.07235600 | 2.12748900  |
| Sum of electronic and thermal Enthalpies= -2279.765803     |             |             |             | Pd | 1.10218400  | -0.15976500 | 0.95565800  |
| Sum of electronic and thermal Free Energies= -2279.884554  |             |             |             | P  | 3.09034800  | 0.40356100  | -0.34481300 |
| HF(B3LYP/6-311+G(d,p)/Lanl2dz, SMD[toluene])= -2281.033935 |             |             |             | C  | 4.57994400  | -0.48695100 | 0.54597400  |
| N                                                          | -3.12411600 | -1.58630100 | -0.52786800 | C  | 4.06503900  | -1.84194600 | 1.08932700  |
| C                                                          | -1.76776200 | -1.18070900 | -0.88716300 | H  | 3.22620800  | -1.69978300 | 1.77820400  |
| H                                                          | -1.69554100 | -1.13779700 | -1.97792900 | H  | 3.73546400  | -2.52593200 | 0.30768300  |
| H                                                          | -1.48601800 | -0.20113100 | -0.47003900 | H  | 4.88181400  | -2.33001400 | 1.63830400  |
| C                                                          | -0.80804500 | -2.24811600 | -0.34561300 | C  | 5.03045300  | 0.32499600  | 1.78048100  |
| C                                                          | -3.26114700 | -1.90253500 | 0.91697500  | H  | 5.74733400  | -0.28328200 | 2.34726400  |
| H                                                          | -4.00970000 | -2.69077500 | 1.02434600  | H  | 5.53823100  | 1.25639000  | 1.51957200  |
| H                                                          | -3.61411900 | -1.02149100 | 1.47080700  | H  | 4.19679300  | 0.55262700  | 2.44986200  |
| C                                                          | -1.88745000 | -2.35347500 | 1.43045400  | C  | 5.82405100  | -0.73734000 | -0.33286400 |
|                                                            |             |             |             | H  | 6.24787300  | 0.18341400  | -0.74051100 |

|                                                            |            |             |             |    |             |             |             |
|------------------------------------------------------------|------------|-------------|-------------|----|-------------|-------------|-------------|
| H                                                          | 6.59985700 | -1.20579100 | 0.28771700  | H  | 3.49128500  | -3.11916000 | -1.21435400 |
| H                                                          | 5.62584600 | -1.41882500 | -1.16221800 | H  | 3.73533100  | -1.40687600 | -1.58147200 |
| C                                                          | 3.54250400 | 2.29126300  | -0.56778900 | C  | 1.61447400  | -2.02416200 | -1.47998100 |
| C                                                          | 2.90377300 | -0.36379800 | -2.13524200 | C  | 1.28309300  | -0.63467000 | -1.82538200 |
| C                                                          | 4.98225200 | 2.56190700  | -1.05711400 | C  | 1.05689700  | 0.53823400  | -2.08828100 |
| H                                                          | 5.09042200 | 3.63961300  | -1.24007700 | C  | -0.85122100 | 1.91932600  | -1.85128900 |
| H                                                          | 5.73109300 | 2.29093500  | -0.30848900 | C  | 0.61311000  | 1.92758000  | -2.32342100 |
| H                                                          | 5.22868200 | 2.04811100  | -1.98712300 | H  | -1.08237000 | 2.76976100  | -1.20976300 |
| C                                                          | 3.34525400 | 3.04602100  | 0.76617600  | H  | -1.54080500 | 1.87033500  | -2.69681200 |
| H                                                          | 3.65138900 | 4.09004900  | 0.61600900  | H  | 0.73955300  | 2.20792100  | -3.37763700 |
| H                                                          | 2.29803000 | 3.04913100  | 1.06780600  | H  | 1.23501900  | 2.60781200  | -1.72935900 |
| H                                                          | 3.93707000 | 2.64951500  | 1.59065400  | S  | 4.37251000  | -1.11054600 | 1.14817700  |
| C                                                          | 2.54990900 | 2.94492300  | -1.55555800 | O  | 4.13794300  | -1.20272400 | 2.59130100  |
| H                                                          | 1.50985600 | 2.73987000  | -1.28101100 | O  | 5.56645100  | -1.67061000 | 0.50755100  |
| H                                                          | 2.69214700 | 4.03291000  | -1.51805600 | C  | 4.31668000  | 0.63548900  | 0.71811500  |
| H                                                          | 2.70534700 | 2.63716500  | -2.59100400 | C  | 5.01469600  | 1.09674500  | -0.40152800 |
| C                                                          | 3.95473800 | 0.09687900  | -3.16789700 | C  | 3.55071100  | 1.51522100  | 1.48832800  |
| H                                                          | 3.78209900 | -0.45680900 | -4.10033600 | C  | 4.93180700  | 2.44327400  | -0.75282000 |
| H                                                          | 3.87671500 | 1.15871900  | -3.41235900 | H  | 5.63419700  | 0.40997700  | -0.96836600 |
| H                                                          | 4.98107900 | -0.10982900 | -2.85530300 | C  | 3.47809800  | 2.85892000  | 1.12242700  |
| C                                                          | 1.49473600 | -0.00884500 | -2.66705400 | H  | 3.04338000  | 1.15280800  | 2.37597500  |
| H                                                          | 1.36924000 | -0.47956600 | -3.65135700 | C  | 4.16471900  | 3.34475600  | -0.00018200 |
| H                                                          | 0.72579400 | -0.40595200 | -2.00305000 | H  | 5.48164700  | 2.80282200  | -1.61955900 |
| H                                                          | 1.33064000 | 1.06119900  | -2.79639000 | H  | 2.88948600  | 3.54488100  | 1.72730500  |
| C                                                          | 2.95027500 | -1.90784200 | -2.05987200 | C  | 4.11828800  | 4.81094400  | -0.36290300 |
| H                                                          | 2.22213900 | -2.29942700 | -1.34598600 | H  | 4.95181500  | 5.35686200  | 0.09884100  |
| H                                                          | 2.68426300 | -2.29760100 | -3.05176400 | H  | 4.19458100  | 4.95994100  | -1.44529900 |
| H                                                          | 3.94468300 | -2.29461500 | -1.82675300 | H  | 3.19160000  | 5.28152400  | -0.01800800 |
| O                                                          | 0.42339200 | -1.92614900 | -0.13411300 | C  | 0.81242600  | -3.85717900 | 0.17437400  |
| <b>2-Int3</b>                                              |            |             |             | H  | 0.22084800  | -4.39916900 | -0.56869800 |
| Zero-point correction= 0.727328 (Hartree/Particle)         |            |             |             | H  | 1.82340200  | -4.28035100 | 0.20959100  |
| Thermal correction to Energy= 0.770274                     |            |             |             | H  | 0.34491200  | -4.01646200 | 1.15157200  |
| Thermal correction to Enthalpy= 0.771219                   |            |             |             | C  | 1.26956900  | -2.94887200 | -2.65847900 |
| Thermal correction to Gibbs Free Energy= 0.652723          |            |             |             | H  | 1.75685900  | -2.61604600 | -3.58163300 |
| Sum of electronic and zero-point Energies= -2279.820032    |            |             |             | H  | 1.59233900  | -3.97362400 | -2.45278700 |
| Sum of electronic and thermal Energies= -2279.777085       |            |             |             | H  | 0.18702200  | -2.94923200 | -2.82028700 |
| Sum of electronic and thermal Enthalpies= -2279.776141     |            |             |             | Pd | -0.90271400 | 0.07711200  | -0.86179000 |
| Sum of electronic and thermal Free Energies= -2279.894637  |            |             |             | P  | -3.01761400 | 0.25890300  | 0.26842000  |
| HF(B3LYP/6-311+G(d,p)/Lanl2dz, SMD[toluene])= -2281.046202 |            |             |             | C  | -4.21700900 | -1.11994100 | -0.41953600 |
| N                                                          | 3.06636500 | -1.82904800 | 0.41084000  | C  | -3.40263600 | -2.39445800 | -0.73372800 |
| C                                                          | 1.69947900 | -1.60773900 | 0.90671600  | H  | -2.61067400 | -2.20153500 | -1.45942900 |
| H                                                          | 1.59249300 | -2.01326500 | 1.91471600  | H  | -2.92319000 | -2.83267500 | 0.13844600  |
| H                                                          | 1.43508200 | -0.54067500 | 0.92055300  | H  | -4.09441900 | -3.13668400 | -1.15542900 |
| C                                                          | 0.79931000 | -2.34554000 | -0.13066200 | C  | -4.82617600 | -0.66248100 | -1.76345000 |
| C                                                          | 3.09674100 | -2.11223600 | -1.04009800 | H  | -5.31726000 | -1.52777900 | -2.22648300 |
|                                                            |            |             |             | H  | -5.58839500 | 0.11150500  | -1.64801200 |

|                                                            |             |             |             |    |             |             |             |
|------------------------------------------------------------|-------------|-------------|-------------|----|-------------|-------------|-------------|
| H                                                          | -4.06139000 | -0.30907300 | -2.46291600 | C  | -3.10985800 | 3.83559600  | 0.24150300  |
| C                                                          | -5.37168800 | -1.49911200 | 0.53336500  | C  | -3.81594900 | 3.27035500  | -0.83011600 |
| H                                                          | -6.01119000 | -0.65477200 | 0.79746900  | C  | -4.33372800 | 1.97900100  | -0.75210300 |
| H                                                          | -6.00432200 | -2.24047700 | 0.02705200  | C  | -2.58897000 | 5.25176800  | 0.16182400  |
| H                                                          | -5.01602000 | -1.96209500 | 1.45610900  | S  | -4.77057900 | -0.44821200 | 0.51015100  |
| C                                                          | -3.97442600 | 1.96882500  | 0.19025300  | O  | -5.85644500 | -0.55670200 | -0.46810800 |
| C                                                          | -2.62999500 | -0.10745700 | 2.15126600  | O  | -4.96502900 | -0.75078100 | 1.93217100  |
| C                                                          | -5.41969900 | 1.91908200  | 0.73753000  | H  | -3.33426600 | 1.19793200  | 2.40864900  |
| H                                                          | -5.80754000 | 2.94608600  | 0.77281400  | H  | -2.40260500 | 3.49524400  | 2.24980500  |
| H                                                          | -6.08574800 | 1.35229700  | 0.08217300  | H  | -3.96960300 | 3.85225300  | -1.73594000 |
| H                                                          | -5.49782800 | 1.50837000  | 1.74407200  | H  | -4.90267300 | 1.55677400  | -1.57324600 |
| C                                                          | -4.06894100 | 2.50569100  | -1.25867800 | H  | -3.35551000 | 5.97293000  | 0.47598900  |
| H                                                          | -4.64460500 | 3.44071100  | -1.23015200 | H  | -1.72013200 | 5.39731600  | 0.81246600  |
| H                                                          | -3.09471800 | 2.73714000  | -1.67956400 | H  | -2.29703000 | 5.51454800  | -0.86060800 |
| H                                                          | -4.58386600 | 1.83314900  | -1.94219900 | C  | -2.39521200 | -1.72734200 | 0.84024800  |
| C                                                          | -3.18307200 | 3.02852800  | 0.99076000  | C  | -3.21372800 | -1.54394700 | -1.45208000 |
| H                                                          | -2.12990200 | 3.06486700  | 0.69838500  | C  | -1.52667300 | -2.60850000 | -0.08732700 |
| H                                                          | -3.61850600 | 4.01504700  | 0.78480800  | H  | -2.70307800 | -2.24454900 | 1.75134900  |
| H                                                          | -3.23561500 | 2.87455500  | 2.07009100  | H  | -1.85760600 | -0.80699500 | 1.09990400  |
| C                                                          | -3.74667900 | 0.25982500  | 3.15113300  | C  | -1.67841100 | -1.80473400 | -1.45236700 |
| H                                                          | -3.42481700 | -0.06451800 | 4.14948900  | H  | -3.40351400 | -0.60638900 | -1.97941900 |
| H                                                          | -3.93846300 | 1.33347000  | 3.21363500  | H  | -3.79398700 | -2.34074100 | -1.93057500 |
| H                                                          | -4.68991300 | -0.24927000 | 2.93691900  | N  | -3.56411000 | -1.46496500 | -0.01754300 |
| C                                                          | -1.34601000 | 0.67028000  | 2.52664800  | C  | -2.11680200 | -4.03776000 | -0.15858700 |
| H                                                          | -1.08883200 | 0.43292700  | 3.56741600  | H  | -1.52434700 | -4.67498000 | -0.82073700 |
| H                                                          | -0.50799500 | 0.36650600  | 1.89385600  | H  | -2.11708200 | -4.49346200 | 0.83667000  |
| H                                                          | -1.45387400 | 1.75372200  | 2.45465400  | H  | -3.14921100 | -4.01877400 | -0.51765300 |
| C                                                          | -2.29899300 | -1.60553300 | 2.33767000  | C  | -1.20628800 | -2.58166100 | -2.68964600 |
| H                                                          | -1.55381600 | -1.94352700 | 1.61095600  | H  | -1.34799300 | -1.95388600 | -3.57587300 |
| H                                                          | -1.88958200 | -1.73359000 | 3.34898700  | H  | -0.13539200 | -2.79942500 | -2.60352500 |
| H                                                          | -3.18543500 | -2.24180500 | 2.27338800  | H  | -1.74377400 | -3.52374300 | -2.84407900 |
| O                                                          | -0.50398800 | -1.91679300 | -0.17269200 | C  | 0.67157900  | -3.49575700 | 1.00592600  |
|                                                            |             |             |             | O  | -1.09466900 | -0.55205500 | -1.38341300 |
| <b>2-Ts3</b>                                               |             |             |             | C  | 1.66372500  | -4.23824400 | 1.67013200  |
| Zero-point correction= 0.719825 (Hartree/Particle)         |             |             |             | H  | 1.69707400  | -4.14687700 | 2.75635900  |
| Thermal correction to Energy= 0.763297                     |             |             |             | C  | 2.54425000  | -5.05834500 | 1.05380400  |
| Thermal correction to Enthalpy= 0.764242                   |             |             |             | H  | 2.54229700  | -5.18821000 | -0.02394100 |
| Thermal correction to Gibbs Free Energy= 0.642868          |             |             |             | H  | 3.27879600  | -5.61682900 | 1.62541900  |
| Sum of electronic and zero-point Energies= -2279.802840    |             |             |             | Pd | 0.74039400  | -0.09791400 | -0.70768800 |
| Sum of electronic and thermal Energies= -2279.759367       |             |             |             | P  | 2.81760400  | 0.68764000  | 0.01109700  |
| Sum of electronic and thermal Enthalpies= -2279.758423     |             |             |             | C  | 3.04618300  | 0.62933800  | 1.93935200  |
| Sum of electronic and thermal Free Energies= -2279.879797  |             |             |             | C  | 4.27017800  | -0.28961600 | -0.83285700 |
| HF(B3LYP/6-311+G(d,p)/Lanl2dz, SMD[toluene])= -2281.029369 |             |             |             | C  | 2.88120900  | 2.54459000  | -0.57251500 |
| C                                                          | -4.14126900 | 1.23290600  | 0.41343800  | C  | 4.28180500  | 3.18665500  | -0.62739900 |
| C                                                          | -3.44644600 | 1.77534000  | 1.49725300  | H  | 4.93419700  | 2.71136500  | -1.36399600 |
| C                                                          | -2.93541900 | 3.06910700  | 1.40266400  | H  | 4.17950400  | 4.23991600  | -0.92243400 |



|                                                            |             |             |             |    |             |             |             |
|------------------------------------------------------------|-------------|-------------|-------------|----|-------------|-------------|-------------|
| H                                                          | 4.79086800  | 3.16797000  | 0.33987900  | C  | -5.71047900 | -0.05674400 | -0.16134300 |
| C                                                          | 2.23136200  | 2.61627800  | -1.97749100 | C  | -5.98512500 | 0.93136100  | 0.78727300  |
| H                                                          | 2.78328800  | 2.07340600  | -2.74415900 | C  | -6.42712200 | 2.18298200  | 0.36034900  |
| H                                                          | 1.20355600  | 2.23100100  | -1.96490400 | C  | -6.59638400 | 2.46735700  | -1.00186700 |
| H                                                          | 2.18153900  | 3.66837200  | -2.28907900 | C  | -6.32344700 | 1.45480500  | -1.93356100 |
| C                                                          | 1.98309100  | 3.40892500  | 0.34123600  | C  | -5.88174200 | 0.19803900  | -1.52514400 |
| H                                                          | 0.97661000  | 2.98938300  | 0.43953000  | C  | -7.04735200 | 3.83457700  | -1.45902800 |
| H                                                          | 2.40204500  | 3.55548500  | 1.33904700  | S  | -5.09846800 | -1.65887200 | 0.37446000  |
| H                                                          | 1.88339200  | 4.40280900  | -0.11448800 | O  | -5.44569200 | -2.63164200 | -0.66377100 |
| C                                                          | 4.28947900  | 0.03199800  | -2.34427400 | O  | -5.49950200 | -1.83595500 | 1.77347800  |
| H                                                          | 4.99016200  | -0.65585000 | -2.83500400 | H  | -5.88144600 | 0.70694100  | 1.84358800  |
| H                                                          | 3.30624800  | -0.11902600 | -2.80198500 | H  | -6.65268400 | 2.94893500  | 1.09850300  |
| H                                                          | 4.63025900  | 1.04600600  | -2.56492400 | H  | -6.46599300 | 1.65060300  | -2.99364800 |
| C                                                          | 5.67663100  | -0.03070900 | -0.25631500 | H  | -5.69683200 | -0.58945400 | -2.24785000 |
| H                                                          | 6.41224200  | -0.59283900 | -0.84744200 | H  | -7.59750300 | 4.35988700  | -0.67167100 |
| H                                                          | 5.96350100  | 1.02329700  | -0.29738700 | H  | -6.18791900 | 4.46116500  | -1.73268100 |
| H                                                          | 5.77371400  | -0.36970000 | 0.77823200  | H  | -7.69376000 | 3.76939000  | -2.34087200 |
| C                                                          | 3.94907700  | -1.80093200 | -0.73592700 | C  | -2.76333800 | -0.69526400 | 1.36494200  |
| H                                                          | 3.97231000  | -2.18885800 | 0.28225500  | C  | -2.69435500 | -1.38245200 | -0.88439000 |
| H                                                          | 2.96318500  | -2.01980400 | -1.15728300 | C  | -1.25884300 | -1.03604100 | 1.13828300  |
| H                                                          | 4.70084100  | -2.35450000 | -1.31471200 | H  | -3.10780700 | -0.93324600 | 2.37277400  |
| C                                                          | 4.15451100  | 1.54108500  | 2.50403300  | H  | -2.95233300 | 0.36905800  | 1.15768000  |
| H                                                          | 4.22297600  | 1.38596900  | 3.58929600  | C  | -1.18858400 | -1.37982000 | -0.46442100 |
| H                                                          | 5.13835900  | 1.32157000  | 2.08145100  | H  | -2.91283300 | -0.41087200 | -1.35048700 |
| H                                                          | 3.94643500  | 2.60230000  | 2.34679300  | H  | -2.94535000 | -2.18771600 | -1.57626400 |
| C                                                          | 1.69421400  | 1.00113600  | 2.59563000  | N  | -3.42139000 | -1.55952200 | 0.38055300  |
| H                                                          | 1.77776400  | 0.84681700  | 3.67981100  | C  | -0.84889000 | -2.18465700 | 2.08395200  |
| H                                                          | 1.40690500  | 2.04046300  | 2.43669200  | H  | 0.17121900  | -2.52759700 | 1.88904300  |
| H                                                          | 0.88581800  | 0.36680200  | 2.21950400  | H  | -0.89951700 | -1.85216400 | 3.12706400  |
| C                                                          | 3.33704700  | -0.82283400 | 2.37638400  | H  | -1.53075500 | -3.03109100 | 1.96313900  |
| H                                                          | 4.33301300  | -1.16613000 | 2.08811300  | C  | -0.58399800 | -2.77212000 | -0.73451400 |
| H                                                          | 3.28519800  | -0.87040100 | 3.47200800  | H  | -0.55608900 | -2.91378700 | -1.82028200 |
| H                                                          | 2.59542200  | -1.52269700 | 1.98086900  | H  | 0.44457100  | -2.83800300 | -0.36517100 |
| C                                                          | -0.11910700 | -2.73347600 | 0.42093900  | H  | -1.17264400 | -3.58437300 | -0.29318700 |
| H                                                          | 0.60637100  | -1.49471300 | 0.12353600  | C  | 0.05286200  | 1.24793300  | 1.62266500  |
|                                                            |             |             |             | O  | -0.54408000 | -0.38603900 | -1.16837700 |
| <b>2-Int4</b>                                              |             |             |             | C  | 0.46627500  | 2.58480300  | 1.89905000  |
| Zero-point correction= 0.722088 (Hartree/Particle)         |             |             |             | H  | 0.50107600  | 3.25889000  | 1.04346300  |
| Thermal correction to Energy= 0.766155                     |             |             |             | C  | 0.75768500  | 3.05562700  | 3.12240900  |
| Thermal correction to Enthalpy= 0.767099                   |             |             |             | H  | 0.72763400  | 2.42046200  | 4.00266100  |
| Thermal correction to Gibbs Free Energy= 0.643859          |             |             |             | H  | 1.02585400  | 4.09771300  | 3.26771100  |
| Sum of electronic and zero-point Energies= -2279.800173    |             |             |             | Pd | 1.38017300  | -0.04744600 | -0.53676600 |
| Sum of electronic and thermal Energies= -2279.756107       |             |             |             | P  | 3.73790200  | 0.13326100  | -0.24092800 |
| Sum of electronic and thermal Enthalpies= -2279.755162     |             |             |             | C  | 4.31822300  | 1.93003900  | -0.71421700 |
| Sum of electronic and thermal Free Energies= -2279.878402  |             |             |             | C  | 4.31273700  | -0.26662300 | 1.57841800  |
| HF(B3LYP/6-311+G(d,p)/Lanl2dz, SMD[toluene])= -2281.030934 |             |             |             | C  | 4.62647500  | -1.13493000 | -1.43832800 |

|                                            |              |                    |             |                                               |              |             |             |
|--------------------------------------------|--------------|--------------------|-------------|-----------------------------------------------|--------------|-------------|-------------|
| C                                          | 6.12086900   | -1.37584100        | -1.13081200 | Sum of electronic and thermal Enthalpies=     | -2279.751243 |             |             |
| H                                          | 6.27696500   | -1.87453600        | -0.17161000 | Sum of electronic and thermal Free Energies=  | -2279.874953 |             |             |
| H                                          | 6.53239400   | -2.03817100        | -1.90366600 | HF(B3LYP/6-311+G(d,p)/LanL2dz, SMD[toluene])= | -2281.023499 |             |             |
| H                                          | 6.71404400   | -0.45871300        | -1.14101600 | C                                             | -4.14126900  | 1.23290600  | 0.41343800  |
| C                                          | 3.89140300   | -2.49671400        | -1.38038400 | C                                             | -3.44644600  | 1.77534000  | 1.49725300  |
| H                                          | 3.95287900   | -2.98276600        | -0.40690900 | C                                             | -2.93541900  | 3.06910700  | 1.40266400  |
| H                                          | 2.83574800   | -2.39538100        | -1.64326100 | C                                             | -3.10985800  | 3.83559600  | 0.24150300  |
| H                                          | 4.35957400   | -3.16996800        | -2.11058100 | C                                             | -3.81594900  | 3.27035500  | -0.83011600 |
| C                                          | 4.51405100   | -0.65554400        | -2.90350400 | C                                             | -4.33372800  | 1.97900100  | -0.75210300 |
| H                                          | 3.47930800   | -0.44818400        | -3.19198200 | C                                             | -2.58897000  | 5.25176800  | 0.16182400  |
| H                                          | 5.12122300   | 0.22702000         | -3.11535600 | S                                             | -4.77057900  | -0.44821200 | 0.51015100  |
| H                                          | 4.87922400   | -1.46027400        | -3.55419800 | O                                             | -5.85644500  | -0.55670200 | -0.46810800 |
| C                                          | 4.17392200   | -1.78246500        | 1.84441700  | O                                             | -4.96502900  | -0.75078100 | 1.93217100  |
| H                                          | 4.30517000   | -1.95580700        | 2.92026100  | H                                             | -3.33426600  | 1.19793200  | 2.40864900  |
| H                                          | 3.18180500   | -2.15603400        | 1.57093300  | H                                             | -2.40260500  | 3.49524400  | 2.24980500  |
| H                                          | 4.92793300   | -2.38121300        | 1.32989300  | H                                             | -3.96960300  | 3.85225300  | -1.73594000 |
| C                                          | 5.75381900   | 0.16582200         | 1.92273000  | H                                             | -4.90267300  | 1.55677400  | -1.57324600 |
| H                                          | 5.98385800   | -0.16957500        | 2.94301700  | H                                             | -3.35551000  | 5.97293000  | 0.47598900  |
| H                                          | 6.50411400   | -0.27063400        | 1.26075900  | H                                             | -1.72013200  | 5.39731600  | 0.81246600  |
| H                                          | 5.87783200   | 1.25156800         | 1.91014400  | H                                             | -2.29703000  | 5.51454800  | -0.86060800 |
| C                                          | 3.34522900   | 0.41947200         | 2.56804600  | C                                             | -2.39521200  | -1.72734200 | 0.84024800  |
| H                                          | 3.34791900   | 1.50633600         | 2.49952000  | C                                             | -3.21372800  | -1.54394700 | -1.45208000 |
| H                                          | 2.31730200   | 0.07600200         | 2.42844500  | C                                             | -1.52667300  | -2.60850000 | -0.08732700 |
| H                                          | 3.65232200   | 0.15421400         | 3.58870700  | H                                             | -2.70307800  | -2.24454900 | 1.75134900  |
| C                                          | 5.82024700   | 2.08979200         | -1.02805500 | H                                             | -1.85760600  | -0.80699500 | 1.09990400  |
| H                                          | 6.02481200   | 3.15057500         | -1.22597300 | C                                             | -1.67841100  | -1.80473400 | -1.45236700 |
| H                                          | 6.46073900   | 1.78589800         | -0.19626100 | H                                             | -3.40351400  | -0.60638900 | -1.97941900 |
| H                                          | 6.12852000   | 1.53585500         | -1.91727600 | H                                             | -3.79398700  | -2.34074100 | -1.93057500 |
| C                                          | 3.49144000   | 2.38574800         | -1.94140300 | N                                             | -3.56411000  | -1.46496500 | -0.01754300 |
| H                                          | 3.74856200   | 3.42944500         | -2.16685900 | C                                             | -2.11680200  | -4.03776000 | -0.15858700 |
| H                                          | 3.68900200   | 1.79838700         | -2.83831900 | H                                             | -1.52434700  | -4.67498000 | -0.82073700 |
| H                                          | 2.41723700   | 2.33168900         | -1.73900700 | H                                             | -2.11708200  | -4.49346200 | 0.83667000  |
| C                                          | 3.96341300   | 2.90823500         | 0.42648800  | H                                             | -3.14921100  | -4.01877400 | -0.51765300 |
| H                                          | 4.59374400   | 2.78164900         | 1.30972300  | C                                             | -1.20628800  | -2.58166100 | -2.68964600 |
| H                                          | 4.12219700   | 3.93185100         | 0.06275400  | H                                             | -1.34799300  | -1.95388600 | -3.57587300 |
| H                                          | 2.91721800   | 2.82673300         | 0.73162800  | H                                             | -0.13539200  | -2.79942500 | -2.60352500 |
| C                                          | -0.44823900  | 0.15831700         | 1.38884400  | H                                             | -1.74377400  | -3.52374300 | -2.84407900 |
| H                                          | 1.80986900   | -0.50359600        | -1.92909100 | C                                             | 0.67157900   | -3.49575700 | 1.00592600  |
|                                            |              |                    |             | O                                             | -1.09466900  | -0.55205500 | -1.38341300 |
| <b>2-Ts4</b>                               |              |                    |             | C                                             | 1.66372500   | -4.23824400 | 1.67013200  |
| Zero-point correction=                     | 0.719090     | (Hartree/Particle) |             | H                                             | 1.69707400   | -4.14687700 | 2.75635900  |
| Thermal correction to Energy=              | 0.762752     |                    |             | C                                             | 2.54425000   | -5.05834500 | 1.05380400  |
| Thermal correction to Enthalpy=            | 0.763697     |                    |             | H                                             | 2.54229700   | -5.18821000 | -0.02394100 |
| Thermal correction to Gibbs Free Energy=   | 0.639986     |                    |             | H                                             | 3.27879600   | -5.61682900 | 1.62541900  |
| Sum of electronic and zero-point Energies= | -2279.795849 |                    |             | Pd                                            | 0.74039400   | -0.09791400 | -0.70768800 |
| Sum of electronic and thermal Energies=    | -2279.752187 |                    |             | P                                             | 2.81760400   | 0.68764000  | 0.01109700  |

|                                                    |             |             |             |                                                            |             |             |             |
|----------------------------------------------------|-------------|-------------|-------------|------------------------------------------------------------|-------------|-------------|-------------|
| C                                                  | 3.04618300  | 0.62933800  | 1.93935200  | Thermal correction to Gibbs Free Energy= 0.651512          |             |             |             |
| C                                                  | 4.27017800  | -0.28961600 | -0.83285700 | Sum of electronic and zero-point Energies= -2279.839311    |             |             |             |
| C                                                  | 2.88120900  | 2.54459000  | -0.57251500 | Sum of electronic and thermal Energies= -2279.796323       |             |             |             |
| C                                                  | 4.28180500  | 3.18665500  | -0.62739900 | Sum of electronic and thermal Enthalpies= -2279.795379     |             |             |             |
| H                                                  | 4.93419700  | 2.71136500  | -1.36399600 | Sum of electronic and thermal Free Energies= -2279.914305  |             |             |             |
| H                                                  | 4.17950400  | 4.23991600  | -0.92243400 | HF(B3LYP/6-311+G(d,p)/Lanl2dz, SMD[toluene])= -2281.068624 |             |             |             |
| H                                                  | 4.79086800  | 3.16797000  | 0.33987900  | C                                                          | -5.05503300 | 0.53614500  | -0.23910700 |
| C                                                  | 2.23136200  | 2.61627800  | -1.97749100 | C                                                          | -5.26650200 | 1.24740800  | 0.94538600  |
| H                                                  | 2.78328800  | 2.07340600  | -2.74415900 | C                                                          | -5.14474000 | 2.63631900  | 0.94030500  |
| H                                                  | 1.20355600  | 2.23100100  | -1.96490400 | C                                                          | -4.81297300 | 3.33189900  | -0.23106000 |
| H                                                  | 2.18153900  | 3.66837200  | -2.28907900 | C                                                          | -4.62438200 | 2.59747900  | -1.41064200 |
| C                                                  | 1.98309100  | 3.40892500  | 0.34123600  | C                                                          | -4.74263200 | 1.20855500  | -1.42404400 |
| H                                                  | 0.97661000  | 2.98938300  | 0.43953000  | C                                                          | -4.64920800 | 4.83354200  | -0.21899900 |
| H                                                  | 2.40204500  | 3.55548500  | 1.33904700  | S                                                          | -5.14226600 | -1.26027600 | -0.22849500 |
| H                                                  | 1.88339200  | 4.40280900  | -0.11448800 | O                                                          | -5.52559900 | -1.67924500 | -1.57911800 |
| C                                                  | 4.28947900  | 0.03199800  | -2.34427400 | O                                                          | -5.91107000 | -1.64316400 | 0.96041800  |
| H                                                  | 4.99016200  | -0.65585000 | -2.83500400 | H                                                          | -5.55493400 | 0.71533800  | 1.84572500  |
| H                                                  | 3.30624800  | -0.11902600 | -2.80198500 | H                                                          | -5.32118300 | 3.19045600  | 1.85939300  |
| H                                                  | 4.63025900  | 1.04600600  | -2.56492400 | H                                                          | -4.39076400 | 3.12107400  | -2.33474100 |
| C                                                  | 5.67663100  | -0.03070900 | -0.25631500 | H                                                          | -4.62416900 | 0.64920900  | -2.34587000 |
| H                                                  | 6.41224200  | -0.59283900 | -0.84744200 | H                                                          | -5.29507500 | 5.30209300  | 0.53115800  |
| H                                                  | 5.96350100  | 1.02329700  | -0.29738700 | H                                                          | -3.61461400 | 5.11371700  | 0.02099400  |
| H                                                  | 5.77371400  | -0.36970000 | 0.77823200  | H                                                          | -4.88707600 | 5.27148800  | -1.19407900 |
| C                                                  | 3.94907700  | -1.80093200 | -0.73592700 | C                                                          | -2.98392800 | -1.76996900 | 1.36330600  |
| H                                                  | 3.97231000  | -2.18885800 | 0.28225500  | C                                                          | -2.57950400 | -1.75255700 | -1.04623100 |
| H                                                  | 2.96318500  | -2.01980400 | -1.15728300 | C                                                          | -1.47404000 | -1.56314200 | 1.09916800  |
| H                                                  | 4.70084100  | -2.35450000 | -1.31471200 | H                                                          | -3.17774800 | -2.71548500 | 1.88172900  |
| C                                                  | 4.15451100  | 1.54108500  | 2.50403300  | H                                                          | -3.40732100 | -0.96989600 | 1.97996700  |
| H                                                  | 4.22297600  | 1.38596900  | 3.58929600  | C                                                          | -1.28985700 | -2.23904500 | -0.32742900 |
| H                                                  | 5.13835900  | 1.32157000  | 2.08145100  | H                                                          | -2.41549900 | -0.73301100 | -1.41887700 |
| H                                                  | 3.94643500  | 2.60230000  | 2.34679300  | H                                                          | -2.86433500 | -2.39827700 | -1.87937900 |
| C                                                  | 1.69421400  | 1.00113600  | 2.59563000  | N                                                          | -3.59515600 | -1.80728900 | 0.01736300  |
| H                                                  | 1.77776400  | 0.84681700  | 3.67981100  | C                                                          | -0.62157800 | -2.17913100 | 2.22184500  |
| H                                                  | 1.40690500  | 2.04046300  | 2.43669200  | H                                                          | 0.44023400  | -2.13047800 | 1.95697500  |
| H                                                  | 0.88581800  | 0.36680200  | 2.21950400  | H                                                          | -0.75748400 | -1.62529200 | 3.15855800  |
| C                                                  | 3.33704700  | -0.82283400 | 2.37638400  | H                                                          | -0.88831400 | -3.22481900 | 2.40735200  |
| H                                                  | 4.33301300  | -1.16613000 | 2.08811300  | C                                                          | -1.29853400 | -3.78112900 | -0.23385700 |
| H                                                  | 3.28519800  | -0.87040100 | 3.47200800  | H                                                          | -1.25705600 | -4.18994400 | -1.24839000 |
| H                                                  | 2.59542200  | -1.52269700 | 1.98086900  | H                                                          | -0.41578100 | -4.13606000 | 0.30609900  |
| C                                                  | -0.11910700 | -2.73347600 | 0.42093900  | H                                                          | -2.19911000 | -4.17155700 | 0.25327200  |
| H                                                  | 0.60637100  | -1.49471300 | 0.12353600  | C                                                          | -0.13970500 | 0.53662700  | 0.40443500  |
|                                                    |             |             |             | O                                                          | -0.15388900 | -1.87610000 | -1.02592800 |
| <b>2-Int5</b>                                      |             |             |             | C                                                          | -0.01182300 | 1.99441500  | 0.32030700  |
| Zero-point correction= 0.726506 (Hartree/Particle) |             |             |             | H                                                          | 0.21692800  | 2.40377000  | -0.66322300 |
| Thermal correction to Energy= 0.769494             |             |             |             | C                                                          | -0.18814700 | 2.84307000  | 1.34622000  |
| Thermal correction to Enthalpy= 0.770438           |             |             |             | H                                                          | -0.39130800 | 2.48622200  | 2.35256200  |

|    |             |             |             |                                                            |             |             |             |
|----|-------------|-------------|-------------|------------------------------------------------------------|-------------|-------------|-------------|
| H  | -0.14165800 | 3.91995500  | 1.20422800  | Zero-point correction= 0.724884 (Hartree/Particle)         |             |             |             |
| Pd | 1.26989200  | -0.61141100 | -0.45786900 | Thermal correction to Energy= 0.767352                     |             |             |             |
| P  | 3.45697100  | 0.29654000  | -0.05501700 | Thermal correction to Enthalpy= 0.768296                   |             |             |             |
| C  | 3.92871300  | 2.05077500  | -0.75181200 | Thermal correction to Gibbs Free Energy= 0.649519          |             |             |             |
| C  | 3.94539300  | 0.19791300  | 1.82026100  | Sum of electronic and zero-point Energies= -2279.817558    |             |             |             |
| C  | 4.46992300  | -1.04711100 | -1.05067500 | Sum of electronic and thermal Energies= -2279.775089       |             |             |             |
| C  | 5.95786700  | -1.17848700 | -0.66891200 | Sum of electronic and thermal Enthalpies= -2279.774145     |             |             |             |
| H  | 6.09763700  | -1.52874200 | 0.35658900  | Sum of electronic and thermal Free Energies= -2279.892923  |             |             |             |
| H  | 6.42764500  | -1.92090500 | -1.32823400 | HF(B3LYP/6-311+G(d,p)/Lanl2dz, SMD[toluene])= -2281.043116 |             |             |             |
| H  | 6.50910500  | -0.24273500 | -0.78749500 | C                                                          | 5.72073400  | -0.09003800 | 0.29656000  |
| C  | 3.77945600  | -2.42030500 | -0.84483400 | C                                                          | 6.25762500  | 0.41818300  | -0.88903100 |
| H  | 3.76478200  | -2.75642300 | 0.19106200  | C                                                          | 6.67077800  | 1.74958600  | -0.93728500 |
| H  | 2.74491000  | -2.42988400 | -1.21724900 | C                                                          | 6.55981700  | 2.58522100  | 0.18241200  |
| H  | 4.32331500  | -3.17435200 | -1.42958600 | C                                                          | 6.02258200  | 2.04981900  | 1.36283000  |
| C  | 4.37295000  | -0.76463900 | -2.56789000 | C                                                          | 5.60576000  | 0.72198700  | 1.42935200  |
| H  | 3.33635400  | -0.63745000 | -2.89743800 | C                                                          | 7.04048500  | 4.01662300  | 0.13369700  |
| H  | 4.94914100  | 0.10744600  | -2.88223600 | S                                                          | 5.12640600  | -1.78629100 | 0.35218000  |
| H  | 4.78197700  | -1.63007000 | -3.10501700 | O                                                          | 5.24282400  | -2.24086800 | 1.73983300  |
| C  | 3.89930800  | -1.27424000 | 2.28687500  | O                                                          | 5.75964500  | -2.49977200 | -0.76156300 |
| H  | 3.99523200  | -1.29178300 | 3.38000300  | H                                                          | 6.37199800  | -0.23382400 | -1.74848100 |
| H  | 2.94692300  | -1.75050400 | 2.03328200  | H                                                          | 7.09449000  | 2.14337600  | -1.85823400 |
| H  | 4.71520400  | -1.87899100 | 1.88457600  | H                                                          | 5.93670100  | 2.68003800  | 2.24501100  |
| C  | 5.32813600  | 0.78064100  | 2.17763000  | H                                                          | 5.21667600  | 0.30693900  | 2.35300100  |
| H  | 5.50924100  | 0.62452200  | 3.24945900  | H                                                          | 7.04595900  | 4.40368100  | -0.89043500 |
| H  | 6.14470100  | 0.29653500  | 1.63609600  | H                                                          | 6.40904000  | 4.67272800  | 0.74258900  |
| H  | 5.39061800  | 1.85645600  | 1.99784900  | H                                                          | 8.06455300  | 4.10183400  | 0.52103500  |
| C  | 2.85355100  | 0.93203200  | 2.63471500  | C                                                          | 3.06226100  | -1.47149800 | -1.38372700 |
| H  | 2.80615800  | 2.00186300  | 2.43313800  | C                                                          | 2.53238600  | -1.20238000 | 0.97524600  |
| H  | 1.86409500  | 0.50790800  | 2.44327400  | C                                                          | 1.59362400  | -0.99118600 | -1.25309000 |
| H  | 3.07713100  | 0.80778700  | 3.70265600  | H                                                          | 3.14565800  | -2.39419900 | -1.96523000 |
| C  | 5.43184600  | 2.25862400  | -1.03332100 | H                                                          | 3.68699400  | -0.71391500 | -1.87689800 |
| H  | 5.58346900  | 3.29122300  | -1.37523300 | C                                                          | 1.16707600  | -1.34990600 | 0.24152100  |
| H  | 6.04954100  | 2.11815500  | -0.14257300 | H                                                          | 2.69643900  | -0.13956800 | 1.20146300  |
| H  | 5.81304400  | 1.60406500  | -1.81985800 | H                                                          | 2.57773400  | -1.77833100 | 1.90110100  |
| C  | 3.13129100  | 2.27174300  | -2.05969300 | N                                                          | 3.49971200  | -1.72932600 | 0.00411800  |
| H  | 3.28349700  | 3.30671100  | -2.39304800 | C                                                          | 0.70744400  | -1.60266700 | -2.35220600 |
| H  | 3.44865900  | 1.61903900  | -2.87303800 | H                                                          | -0.34063900 | -1.32858900 | -2.19025800 |
| H  | 2.05939300  | 2.11862600  | -1.90780100 | H                                                          | 1.00012000  | -1.22774900 | -3.34085800 |
| C  | 3.47672100  | 3.15633900  | 0.22870100  | H                                                          | 0.78816700  | -2.69455500 | -2.37206900 |
| H  | 4.07597900  | 3.18386500  | 1.14147300  | C                                                          | 0.66088100  | -2.79775700 | 0.36690700  |
| H  | 3.60837500  | 4.12620200  | -0.26874900 | H                                                          | 0.45357300  | -3.01304300 | 1.41998900  |
| H  | 2.42410500  | 3.06523100  | 0.50341000  | H                                                          | -0.26831300 | -2.93669000 | -0.19346400 |
| C  | -1.18234000 | -0.07334300 | 0.98288700  | H                                                          | 1.40180500  | -3.52318900 | 0.01053900  |
| H  | -1.94811600 | 0.58548300  | 1.39864700  | C                                                          | 0.61731100  | 1.17827800  | -0.57084300 |
|    |             |             |             | O                                                          | 0.25471900  | -0.45424600 | 0.76029700  |
|    |             |             |             | C                                                          | -0.04305900 | 2.36318700  | -0.23044100 |

|    |             |             |             |
|----|-------------|-------------|-------------|
| H  | 0.19737900  | 2.84143200  | 0.71865000  |
| C  | -1.22746200 | 2.74400100  | -0.92238100 |
| H  | -1.32807000 | 2.53198700  | -1.98445800 |
| H  | -1.77100400 | 3.61711600  | -0.57014700 |
| Pd | -1.56186500 | 0.77171800  | -0.05633500 |
| P  | -3.83736200 | 0.08359700  | 0.12987300  |
| C  | -4.01016100 | -1.11601100 | 1.65410400  |
| C  | -5.02891800 | 1.60255200  | 0.40049800  |
| C  | -4.39009700 | -0.85841100 | -1.48176300 |
| C  | -5.91023500 | -1.04510300 | -1.66307600 |
| H  | -6.43811700 | -0.09752200 | -1.79529200 |
| H  | -6.08943000 | -1.63998500 | -2.56903100 |
| H  | -6.37101600 | -1.57828300 | -0.82752500 |
| C  | -3.82248300 | -0.09208400 | -2.70123100 |
| H  | -4.24510600 | 0.90552700  | -2.82366700 |
| H  | -2.73473600 | 0.00879300  | -2.62816300 |
| H  | -4.05235300 | -0.66073100 | -3.61229600 |
| C  | -3.72463200 | -2.25221200 | -1.51854200 |
| H  | -2.64353700 | -2.19388500 | -1.35925500 |
| H  | -4.14769000 | -2.94711500 | -0.79022000 |
| H  | -3.88901600 | -2.68786000 | -2.51272200 |
| C  | -5.16406400 | 2.38890000  | -0.92249100 |
| H  | -5.68398600 | 3.33307900  | -0.71409700 |
| H  | -4.18738100 | 2.63687200  | -1.34914800 |
| H  | -5.75182000 | 1.86087400  | -1.67653400 |
| C  | -6.44384800 | 1.25914500  | 0.91107000  |
| H  | -7.03605600 | 2.18294800  | 0.96316500  |
| H  | -6.97697600 | 0.56789000  | 0.25408400  |
| H  | -6.43211000 | 0.83229900  | 1.91703800  |
| C  | -4.36371200 | 2.57603000  | 1.40371200  |
| H  | -4.29988700 | 2.17669100  | 2.41566900  |
| H  | -3.35364300 | 2.84515600  | 1.08322800  |
| H  | -4.96554200 | 3.49352500  | 1.45173400  |
| C  | -5.30157600 | -1.95730600 | 1.70648000  |
| H  | -5.29820500 | -2.55235400 | 2.62984500  |
| H  | -6.20791800 | -1.34659600 | 1.71648700  |
| H  | -5.37615200 | -2.66299000 | 0.87502800  |
| C  | -2.78595800 | -2.06293500 | 1.65483500  |
| H  | -2.80342900 | -2.64874500 | 2.58395900  |
| H  | -2.79362900 | -2.77419900 | 0.82859900  |
| H  | -1.83813900 | -1.51532700 | 1.61889000  |
| C  | -3.90538700 | -0.29716300 | 2.96043500  |
| H  | -4.79142700 | 0.31079400  | 3.15724900  |
| H  | -3.80439900 | -0.99814800 | 3.79887200  |
| H  | -3.02189100 | 0.34953800  | 2.96741700  |
| C  | 1.49078500  | 0.51586600  | -1.30316800 |

|                                                            |             |             |             |
|------------------------------------------------------------|-------------|-------------|-------------|
| H                                                          | 2.15484200  | 1.07999400  | -1.95741200 |
| <b>2-Int6</b>                                              |             |             |             |
| Zero-point correction= 0.727233 (Hartree/Particle)         |             |             |             |
| Thermal correction to Energy= 0.770721                     |             |             |             |
| Thermal correction to Enthalpy= 0.771665                   |             |             |             |
| Thermal correction to Gibbs Free Energy= 0.646595          |             |             |             |
| Sum of electronic and zero-point Energies= -2279.875279    |             |             |             |
| Sum of electronic and thermal Energies= -2279.831791       |             |             |             |
| Sum of electronic and thermal Enthalpies= -2279.830847     |             |             |             |
| Sum of electronic and thermal Free Energies= -2279.955917  |             |             |             |
| HF(B3LYP/6-311+G(d,p)/LanL2dz, SMD[toluene])= -2281.100487 |             |             |             |
| C                                                          | -5.05503300 | 0.53614500  | -0.23910700 |
| C                                                          | -5.26650200 | 1.24740800  | 0.94538600  |
| C                                                          | -5.14474000 | 2.63631900  | 0.94030500  |
| C                                                          | -4.81297300 | 3.33189900  | -0.23106000 |
| C                                                          | -4.62438200 | 2.59747900  | -1.41064200 |
| C                                                          | -4.74263200 | 1.20855500  | -1.42404400 |
| C                                                          | -4.64920800 | 4.83354200  | -0.21899900 |
| S                                                          | -5.14226600 | -1.26027600 | -0.22849500 |
| O                                                          | -5.52559900 | -1.67924500 | -1.57911800 |
| O                                                          | -5.91107000 | -1.64316400 | 0.96041800  |
| H                                                          | -5.55493400 | 0.71533800  | 1.84572500  |
| H                                                          | -5.32118300 | 3.19045600  | 1.85939300  |
| H                                                          | -4.39076400 | 3.12107400  | -2.33474100 |
| H                                                          | -4.62416900 | 0.64920900  | -2.34587000 |
| H                                                          | -5.29507500 | 5.30209300  | 0.53115800  |
| H                                                          | -3.61461400 | 5.11371700  | 0.02099400  |
| H                                                          | -4.88707600 | 5.27148800  | -1.19407900 |
| C                                                          | -2.98392800 | -1.76996900 | 1.36330600  |
| C                                                          | -2.57950400 | -1.75255700 | -1.04623100 |
| C                                                          | -1.47404000 | -1.56314200 | 1.09916800  |
| H                                                          | -3.17774800 | -2.71548500 | 1.88172900  |
| H                                                          | -3.40732100 | -0.96989600 | 1.97996700  |
| C                                                          | -1.28985700 | -2.23904500 | -0.32742900 |
| H                                                          | -2.41549900 | -0.73301100 | -1.41887700 |
| H                                                          | -2.86433500 | -2.39827700 | -1.87937900 |
| N                                                          | -3.59515600 | -1.80728900 | 0.01736300  |
| C                                                          | -0.62157800 | -2.17913100 | 2.22184500  |
| H                                                          | 0.44023400  | -2.13047800 | 1.95697500  |
| H                                                          | -0.75748400 | -1.62529200 | 3.15855800  |
| H                                                          | -0.88831400 | -3.22481900 | 2.40735200  |
| C                                                          | -1.29853400 | -3.78112900 | -0.23385700 |
| H                                                          | -1.25705600 | -4.18994400 | -1.24839000 |
| H                                                          | -0.41578100 | -4.13606000 | 0.30609900  |
| H                                                          | -2.19911000 | -4.17155700 | 0.25327200  |



|    |             |             |             |
|----|-------------|-------------|-------------|
| H  | 5.63264100  | 5.26279500  | 0.49671200  |
| H  | 4.81515400  | 5.11123900  | -1.06166700 |
| H  | 3.87065300  | 5.33547000  | 0.42274100  |
| C  | 1.16117900  | -3.97779000 | 0.61915200  |
| H  | 0.47226700  | -4.61655200 | 0.06141700  |
| H  | 2.19466800  | -4.22239000 | 0.35305300  |
| H  | 1.02684300  | -4.20154000 | 1.68456000  |
| C  | 0.77376200  | -3.13938000 | -2.20508600 |
| H  | 0.88293200  | -2.88254600 | -3.26556600 |
| H  | 1.32520100  | -4.06594000 | -2.02521100 |
| H  | -0.28752500 | -3.30839700 | -1.99972800 |
| Pd | -1.12818800 | -0.40728700 | -0.68449100 |
| P  | -3.27922600 | 0.41280200  | 0.23804700  |
| C  | -4.70487600 | -0.40555700 | -0.80251000 |
| C  | -4.26120500 | -1.84995000 | -1.14234700 |
| H  | -3.30305300 | -1.85123400 | -1.67490200 |
| H  | -4.15526600 | -2.49140700 | -0.26800500 |
| H  | -5.01492000 | -2.30501400 | -1.79956700 |
| C  | -4.84018800 | 0.31744400  | -2.16097500 |
| H  | -5.50565700 | -0.27416400 | -2.80344100 |
| H  | -5.28211700 | 1.31270900  | -2.07405400 |
| H  | -3.87677200 | 0.40274400  | -2.67403500 |
| C  | -6.09292000 | -0.44262400 | -0.13201600 |
| H  | -6.46052700 | 0.55357000  | 0.12844200  |
| H  | -6.81581900 | -0.88592000 | -0.83076000 |
| H  | -6.10477500 | -1.05571900 | 0.77212400  |
| C  | -3.50003800 | 2.34603400  | 0.18606200  |
| C  | -3.42284400 | -0.18755700 | 2.08301600  |
| C  | -4.93756700 | 2.86558000  | 0.39023000  |
| H  | -4.92611100 | 3.96436600  | 0.38809500  |
| H  | -5.61231500 | 2.55237700  | -0.41064800 |
| H  | -5.36940800 | 2.54592600  | 1.34178500  |
| C  | -2.96668800 | 2.85595300  | -1.17454100 |
| H  | -2.95025900 | 3.95421300  | -1.15696800 |
| H  | -1.94856200 | 2.49673100  | -1.35470300 |
| H  | -3.58339800 | 2.55415800  | -2.02142500 |
| C  | -2.58906800 | 2.98847900  | 1.25563700  |
| H  | -1.55512400 | 2.63741200  | 1.17101600  |
| H  | -2.58375500 | 4.07575400  | 1.10169500  |
| H  | -2.93472400 | 2.81020500  | 2.27596800  |
| C  | -4.55027700 | 0.45860900  | 2.91254800  |
| H  | -4.56661300 | -0.00366800 | 3.90889500  |
| H  | -4.40050800 | 1.53129700  | 3.06257400  |
| H  | -5.53937000 | 0.31239300  | 2.46997500  |
| C  | -2.05972800 | 0.07014900  | 2.77401400  |
| H  | -1.78580500 | 1.12438400  | 2.82691500  |

|   |             |             |            |
|---|-------------|-------------|------------|
| H | -2.12189500 | -0.30215300 | 3.80586400 |
| H | -1.26143300 | -0.47991200 | 2.26686700 |
| C | -3.59945200 | -1.72374000 | 2.11061000 |
| H | -2.81287400 | -2.23067100 | 1.54313600 |
| H | -3.51177400 | -2.05472600 | 3.15406700 |
| H | -4.57965400 | -2.05144400 | 1.75605800 |
| O | -0.46356300 | -2.23249000 | 0.59771200 |

## 2-Int2'

Zero-point correction= 0.726139 (Hartree/Particle)

Thermal correction to Energy= 0.769276

Thermal correction to Enthalpy= 0.770220

Thermal correction to Gibbs Free Energy= 0.649195

Sum of electronic and zero-point Energies= -2279.808861

Sum of electronic and thermal Energies= -2279.765724

Sum of electronic and thermal Enthalpies= -2279.764780

Sum of electronic and thermal Free Energies= -2279.885805

HF(B3LYP/6-311+G(d,p)/LanL2dz, SMD[toluene])= -2281.035638

|   |            |             |             |
|---|------------|-------------|-------------|
| N | 3.00641900 | -1.81220800 | 0.45964400  |
| C | 1.69185500 | -1.66038100 | 1.09697000  |
| H | 1.70608900 | -2.08752100 | 2.10146500  |
| H | 1.37154800 | -0.60922400 | 1.15351700  |
| C | 0.75267900 | -2.41980200 | 0.12039200  |
| C | 2.89285700 | -1.97011800 | -1.00795200 |
| H | 3.38567900 | -2.89997700 | -1.31175100 |
| H | 3.36812800 | -1.14549800 | -1.54912400 |
| C | 1.36609500 | -2.01957500 | -1.26121300 |
| C | 0.77530700 | -0.63341500 | -1.54760000 |
| C | 1.22154600 | 0.33819700  | -2.31566300 |
| C | 0.95973500 | 1.70358200  | -2.85595200 |
| C | 2.22435600 | 0.93296400  | -3.22823900 |
| H | 1.07040500 | 2.56018900  | -2.19164700 |
| H | 0.19688500 | 1.83027500  | -3.62384800 |
| H | 2.30451900 | 0.54175200  | -4.24226900 |
| H | 3.16706200 | 1.27670200  | -2.80397900 |
| S | 4.38330900 | -1.18235300 | 1.13736200  |
| O | 4.25677700 | -1.36415500 | 2.58605600  |
| O | 5.50906700 | -1.72902300 | 0.37341600  |
| C | 4.35884000 | 0.59016800  | 0.82695000  |
| C | 5.03856900 | 1.10964300  | -0.27780700 |
| C | 3.65089100 | 1.43588700  | 1.68573300  |
| C | 4.99335000 | 2.48155200  | -0.52666800 |
| H | 5.62166100 | 0.44580600  | -0.90719600 |
| C | 3.61316500 | 2.80409100  | 1.42044300  |
| H | 3.16710800 | 1.02779500  | 2.56683200  |
| C | 4.27517900 | 3.34824500  | 0.30996100  |

|    |             |             |             |                                                            |             |             |             |
|----|-------------|-------------|-------------|------------------------------------------------------------|-------------|-------------|-------------|
| H  | 5.53878500  | 2.88790400  | -1.37547900 | H                                                          | -5.63492000 | 0.00388500  | 2.29149300  |
| H  | 3.07383900  | 3.46325800  | 2.09679400  | C                                                          | -2.20328400 | -0.49147200 | 2.79052500  |
| C  | 4.21211400  | 4.82961500  | 0.01950100  | H                                                          | -1.89860800 | 0.51860300  | 3.06560700  |
| H  | 5.11879300  | 5.17802100  | -0.48618100 | H                                                          | -2.35816500 | -1.04854900 | 3.72460000  |
| H  | 3.36288500  | 5.06915700  | -0.63468100 | H                                                          | -1.39042100 | -0.97157700 | 2.23860300  |
| H  | 4.08934100  | 5.41344100  | 0.93774500  | C                                                          | -3.77343700 | -2.04727800 | 1.71414700  |
| C  | 0.78289500  | -3.92440700 | 0.42920100  | H                                                          | -2.97709100 | -2.48728400 | 1.10643200  |
| H  | 0.18912900  | -4.48246500 | -0.29976400 | H                                                          | -3.77290000 | -2.56369600 | 2.68308700  |
| H  | 1.80737900  | -4.31408200 | 0.43440100  | H                                                          | -4.74274000 | -2.24424200 | 1.25002600  |
| H  | 0.34709600  | -4.09344100 | 1.41941300  | O                                                          | -0.58776800 | -2.01257600 | 0.21509900  |
| C  | 1.00324300  | -2.95898400 | -2.42231800 |                                                            |             |             |             |
| H  | 1.39751700  | -2.56994600 | -3.36781400 |                                                            |             |             |             |
| H  | 1.41622800  | -3.96187300 | -2.26870700 | <b>2-Ts2'</b>                                              |             |             |             |
| H  | -0.08455400 | -3.04066800 | -2.51787800 | Zero-point correction= 0.725473 (Hartree/Particle)         |             |             |             |
| Pd | -0.97309400 | -0.24588900 | -0.68059100 | Thermal correction to Energy= 0.767900                     |             |             |             |
| P  | -3.21343000 | 0.35146800  | 0.28187200  | Thermal correction to Enthalpy= 0.768844                   |             |             |             |
| C  | -4.59416300 | -0.17408900 | -0.98198500 | Thermal correction to Gibbs Free Energy= 0.651566          |             |             |             |
| C  | -4.21985500 | -1.57385300 | -1.53051400 | Sum of electronic and zero-point Energies= -2279.797174    |             |             |             |
| H  | -3.21188300 | -1.57525300 | -1.95876700 | Sum of electronic and thermal Energies= -2279.754747       |             |             |             |
| H  | -4.25970700 | -2.36074500 | -0.77817300 | Sum of electronic and thermal Enthalpies= -2279.753803     |             |             |             |
| H  | -4.92996900 | -1.83976400 | -2.32521000 | Sum of electronic and thermal Free Energies= -2279.871081  |             |             |             |
| C  | -4.56526600 | 0.76881900  | -2.20573700 | HF(B3LYP/6-311+G(d,p)/Lan12dz, SMD[toluene])= -2281.021153 |             |             |             |
| H  | -5.22686800 | 0.35433700  | -2.97733800 | N                                                          | 3.13697200  | -1.78576300 | 0.43630800  |
| H  | -4.92424200 | 1.77639700  | -1.98464200 | C                                                          | 1.80821100  | -1.69630400 | 1.06400200  |
| H  | -3.56331300 | 0.83998000  | -2.64354400 | H                                                          | 1.83469300  | -2.12847900 | 2.06622500  |
| C  | -6.03260100 | -0.21055300 | -0.42838600 | H                                                          | 1.44867400  | -0.65865700 | 1.12907200  |
| H  | -6.35500000 | 0.75519100  | -0.02970600 | C                                                          | 0.88201400  | -2.48251500 | 0.08778100  |
| H  | -6.72255800 | -0.47678800 | -1.24080600 | C                                                          | 3.04770200  | -2.00655200 | -1.02393300 |
| H  | -6.15768600 | -0.96096300 | 0.35588700  | H                                                          | 3.54735500  | -2.94619000 | -1.28422000 |
| C  | -3.29282600 | 2.27420500  | 0.54330000  | H                                                          | 3.53042600  | -1.20439500 | -1.59267200 |
| C  | -3.51884900 | -0.54500500 | 1.97460500  | C                                                          | 1.52922300  | -2.08546600 | -1.30124300 |
| C  | -4.70148000 | 2.88198400  | 0.69530300  | C                                                          | 0.94599000  | -0.72795100 | -1.59854500 |
| H  | -4.61083300 | 3.96220300  | 0.87416900  | C                                                          | 1.02907400  | 0.36130900  | -2.26017100 |
| H  | -5.31400100 | 2.75639200  | -0.20087400 | C                                                          | -0.19569500 | 1.67437500  | -2.14237400 |
| H  | -5.24767100 | 2.45603600  | 1.54109700  | C                                                          | 1.09495400  | 1.60058400  | -2.96952400 |
| C  | -2.57469400 | 2.93090500  | -0.66169700 | H                                                          | -0.15880300 | 2.39360600  | -1.33432000 |
| H  | -2.51100600 | 4.01441800  | -0.49338000 | H                                                          | -1.10602200 | 1.64417800  | -2.73051700 |
| H  | -1.54675500 | 2.55637200  | -0.76068400 | H                                                          | 0.96413700  | 1.55820300  | -4.05292600 |
| H  | -3.08510900 | 2.77867300  | -1.61275300 | H                                                          | 1.88883900  | 2.28955400  | -2.67354300 |
| C  | -2.45821100 | 2.66535500  | 1.78323700  | S                                                          | 4.44437100  | -0.98300900 | 1.07478600  |
| H  | -1.44555000 | 2.25133900  | 1.74106900  | O                                                          | 4.36322900  | -1.13864800 | 2.52898700  |
| H  | -2.36724400 | 3.75934000  | 1.80869600  | O                                                          | 5.61241000  | -1.41560000 | 0.30113900  |
| H  | -2.92103900 | 2.35916300  | 2.72348500  | C                                                          | 4.20421700  | 0.76599800  | 0.72192300  |
| C  | -4.67742300 | 0.02209200  | 2.81889300  | C                                                          | 4.75260900  | 1.32195800  | -0.43656800 |
| H  | -4.78977600 | -0.59232100 | 3.72234900  | C                                                          | 3.44774300  | 1.55273700  | 1.59621400  |
| H  | -4.49271500 | 1.04702000  | 3.15207500  | C                                                          | 4.53070500  | 2.66995300  | -0.72112300 |
|    |             |             |             | H                                                          | 5.37007400  | 0.70949700  | -1.08502200 |



|    |             |             |             |   |             |             |             |
|----|-------------|-------------|-------------|---|-------------|-------------|-------------|
| C  | 3.23455500  | 2.89721100  | 1.29651700  | C | -4.64185100 | -0.72641800 | 2.55497600  |
| H  | 3.05769000  | 1.11863000  | 2.51059000  | H | -4.78462500 | -1.56011700 | 3.25556500  |
| C  | 3.77078800  | 3.47790000  | 0.13702300  | H | -4.54768000 | 0.18005100  | 3.15854900  |
| H  | 4.97158100  | 3.10582700  | -1.61494000 | H | -5.55353400 | -0.64562800 | 1.95803300  |
| H  | 2.65408400  | 3.51036600  | 1.98214200  | C | -2.15280300 | -1.09871500 | 2.64667900  |
| C  | 3.57437300  | 4.94816400  | -0.15162600 | H | -1.93946100 | -0.16982300 | 3.17609100  |
| H  | 4.32239400  | 5.55550300  | 0.37509900  | H | -2.36098100 | -1.86294800 | 3.40840100  |
| H  | 3.67370200  | 5.16569300  | -1.22018500 | H | -1.27120200 | -1.41217000 | 2.08197700  |
| H  | 2.58849200  | 5.29460800  | 0.17707500  | C | -3.51909800 | -2.42152100 | 1.08224100  |
| C  | 0.97144300  | -3.98663500 | 0.39161300  | H | -2.64076000 | -2.67402000 | 0.48207700  |
| H  | 0.38123300  | -4.56078500 | -0.32832400 | H | -3.57675700 | -3.14957300 | 1.90264800  |
| H  | 2.00486700  | -4.35424400 | 0.38410700  | H | -4.42970200 | -2.54147300 | 0.49008700  |
| H  | 0.55120100  | -4.16738300 | 1.38620000  | O | -0.45364300 | -2.09693100 | 0.16449500  |
| C  | 1.18335900  | -3.02908700 | -2.46428200 |   |             |             |             |
| H  | 1.57107100  | -2.64239700 | -3.41366500 | N | 3.13697200  | -1.78576300 | 0.43630800  |
| H  | 1.61579500  | -4.02075400 | -2.29814500 | C | 1.80821100  | -1.69630400 | 1.06400200  |
| H  | 0.09733300  | -3.13233500 | -2.55270200 | H | 1.83469300  | -2.12847900 | 2.06622500  |
| Pd | -0.75827400 | -0.20518800 | -0.69388200 | H | 1.44867400  | -0.65865700 | 1.12907200  |
| P  | -3.00017100 | 0.28112100  | 0.30551600  | C | 0.88201400  | -2.48251500 | 0.08778100  |
| C  | -4.29132700 | 0.02135000  | -1.13567200 | C | 3.04770200  | -2.00655200 | -1.02393300 |
| C  | -3.79831500 | -1.16769900 | -1.99688200 | H | 3.54735500  | -2.94619000 | -1.28422000 |
| H  | -2.78818900 | -0.98738700 | -2.37991000 | H | 3.53042600  | -1.20439500 | -1.59267200 |
| H  | -3.77896000 | -2.11422300 | -1.45734900 | C | 1.52922300  | -2.08546600 | -1.30124300 |
| H  | -4.47490500 | -1.28529600 | -2.85465800 | C | 0.94599000  | -0.72795100 | -1.59854500 |
| C  | -4.29239600 | 1.24736000  | -2.07597100 | C | 1.02907400  | 0.36130900  | -2.26017100 |
| H  | -4.89365100 | 1.00422200  | -2.96194400 | C | -0.19569500 | 1.67437500  | -2.14237400 |
| H  | -4.73388300 | 2.13853100  | -1.62458300 | C | 1.09495400  | 1.60058400  | -2.96952400 |
| H  | -3.28616000 | 1.49649300  | -2.42602800 | H | -0.15880300 | 2.39360600  | -1.33432000 |
| C  | -5.74750500 | -0.24670800 | -0.70290300 | H | -1.10602200 | 1.64417800  | -2.73051700 |
| H  | -6.16297000 | 0.55882600  | -0.09233900 | H | 0.96413700  | 1.55820300  | -4.05292600 |
| H  | -6.37397000 | -0.33163900 | -1.60162200 | H | 1.88883900  | 2.28955400  | -2.67354300 |
| H  | -5.85354200 | -1.18281700 | -0.15068200 | S | 4.44437100  | -0.98300900 | 1.07478600  |
| C  | -3.27730000 | 2.06184800  | 1.05318100  | O | 4.36322900  | -1.13864800 | 2.52898700  |
| C  | -3.38358600 | -1.01424900 | 1.70966600  | O | 5.61241000  | -1.41560000 | 0.30113900  |
| C  | -4.74853700 | 2.48586000  | 1.24691300  | C | 4.20421700  | 0.76599800  | 0.72192300  |
| H  | -4.77250000 | 3.46741700  | 1.74019700  | C | 4.75260900  | 1.32195800  | -0.43656800 |
| H  | -5.28380700 | 2.59315400  | 0.30022500  | C | 3.44774300  | 1.55273700  | 1.59621400  |
| H  | -5.30878600 | 1.79158100  | 1.87644700  | C | 4.53070500  | 2.66995300  | -0.72112300 |
| C  | -2.57727100 | 3.09167300  | 0.13732900  | H | 5.37007400  | 0.70949700  | -1.08502200 |
| H  | -2.75177600 | 4.09877300  | 0.53976700  | C | 3.23455500  | 2.89721100  | 1.29651700  |
| H  | -1.49743000 | 2.92325800  | 0.12675200  | H | 3.05769000  | 1.11863000  | 2.51059000  |
| H  | -2.93444300 | 3.08512300  | -0.89275300 | C | 3.77078800  | 3.47790000  | 0.13702300  |
| C  | -2.55663400 | 2.17877400  | 2.41514500  | H | 4.97158100  | 3.10582700  | -1.61494000 |
| H  | -1.51425800 | 1.84935900  | 2.35491800  | H | 2.65408400  | 3.51036600  | 1.98214200  |
| H  | -2.55254000 | 3.23547900  | 2.71458400  | C | 3.57437300  | 4.94816400  | -0.15162600 |
| H  | -3.05171100 | 1.62113400  | 3.21204300  | H | 4.32239400  | 5.55550300  | 0.37509900  |

|    |             |             |             |
|----|-------------|-------------|-------------|
| H  | 3.67370200  | 5.16569300  | -1.22018500 |
| H  | 2.58849200  | 5.29460800  | 0.17707500  |
| C  | 0.97144300  | -3.98663500 | 0.39161300  |
| H  | 0.38123300  | -4.56078500 | -0.32832400 |
| H  | 2.00486700  | -4.35424400 | 0.38410700  |
| H  | 0.55120100  | -4.16738300 | 1.38620000  |
| C  | 1.18335900  | -3.02908700 | -2.46428200 |
| H  | 1.57107100  | -2.64239700 | -3.41366500 |
| H  | 1.61579500  | -4.02075400 | -2.29814500 |
| H  | 0.09733300  | -3.13233500 | -2.55270200 |
| Pd | -0.75827400 | -0.20518800 | -0.69388200 |
| P  | -3.00017100 | 0.28112100  | 0.30551600  |
| C  | -4.29132700 | 0.02135000  | -1.13567200 |
| C  | -3.79831500 | -1.16769900 | -1.99688200 |
| H  | -2.78818900 | -0.98738700 | -2.37991000 |
| H  | -3.77896000 | -2.11422300 | -1.45734900 |
| H  | -4.47490500 | -1.28529600 | -2.85465800 |
| C  | -4.29239600 | 1.24736000  | -2.07597100 |
| H  | -4.89365100 | 1.00422200  | -2.96194400 |
| H  | -4.73388300 | 2.13853100  | -1.62458300 |
| H  | -3.28616000 | 1.49649300  | -2.42602800 |
| C  | -5.74750500 | -0.24670800 | -0.70290300 |
| H  | -6.16297000 | 0.55882600  | -0.09233900 |
| H  | -6.37397000 | -0.33163900 | -1.60162200 |
| H  | -5.85354200 | -1.18281700 | -0.15068200 |
| C  | -3.27730000 | 2.06184800  | 1.05318100  |
| C  | -3.38358600 | -1.01424900 | 1.70966600  |
| C  | -4.74853700 | 2.48586000  | 1.24691300  |
| H  | -4.77250000 | 3.46741700  | 1.74019700  |
| H  | -5.28380700 | 2.59315400  | 0.30022500  |
| H  | -5.30878600 | 1.79158100  | 1.87644700  |
| C  | -2.57727100 | 3.09167300  | 0.13732900  |
| H  | -2.75177600 | 4.09877300  | 0.53976700  |
| H  | -1.49743000 | 2.92325800  | 0.12675200  |
| H  | -2.93444300 | 3.08512300  | -0.89275300 |
| C  | -2.55663400 | 2.17877400  | 2.41514500  |
| H  | -1.51425800 | 1.84935900  | 2.35491800  |
| H  | -2.55254000 | 3.23547900  | 2.71458400  |
| H  | -3.05171100 | 1.62113400  | 3.21204300  |
| C  | -4.64185100 | -0.72641800 | 2.55497600  |
| H  | -4.78462500 | -1.56011700 | 3.25556500  |
| H  | -4.54768000 | 0.18005100  | 3.15854900  |
| H  | -5.55353400 | -0.64562800 | 1.95803300  |
| C  | -2.15280300 | -1.09871500 | 2.64667900  |
| H  | -1.93946100 | -0.16982300 | 3.17609100  |
| H  | -2.36098100 | -1.86294800 | 3.40840100  |

|   |             |             |            |
|---|-------------|-------------|------------|
| H | -1.27120200 | -1.41217000 | 2.08197700 |
| C | -3.51909800 | -2.42152100 | 1.08224100 |
| H | -2.64076000 | -2.67402000 | 0.48207700 |
| H | -3.57675700 | -3.14957300 | 1.90264800 |
| H | -4.42970200 | -2.54147300 | 0.49008700 |
| O | -0.45364300 | -2.09693100 | 0.16449500 |

## 2-Ts2''

Zero-point correction= 0.717768 (Hartree/Particle)

Thermal correction to Energy= 0.763185

Thermal correction to Enthalpy= 0.764129

Thermal correction to Gibbs Free Energy= 0.636761

Sum of electronic and zero-point Energies= -2279.749758

Sum of electronic and thermal Energies= -2279.704340

Sum of electronic and thermal Enthalpies= -2279.703396

Sum of electronic and thermal Free Energies= -2279.830765

HF(B3LYP/6-311+G(d,p)/LanL2dz, SMD[toluene])= -2280.976104

|    |             |             |             |
|----|-------------|-------------|-------------|
| C  | 3.10650700  | 1.48245900  | 1.12315800  |
| C  | 2.06930100  | -0.29243700 | -0.28235900 |
| C  | 1.85946400  | 2.04339200  | 1.78523700  |
| C  | -0.43408500 | 2.38780700  | 0.57685500  |
| C  | 2.04631100  | 2.37513400  | 3.25070300  |
| C  | 0.71086000  | 2.25858300  | 1.15430000  |
| C  | 1.22876100  | -0.51951100 | -1.54808500 |
| O  | 0.85505300  | -1.65843000 | -1.77046600 |
| C  | 0.81712800  | 0.65650600  | -2.39840400 |
| Pd | -1.91897000 | 0.96143900  | 0.39921300  |
| C  | -1.02993100 | 3.50692600  | -0.23769900 |
| C  | -0.23874900 | 4.11883100  | -1.28391900 |
| N  | 2.90425100  | 0.91786700  | -0.22614300 |
| C  | 5.41452500  | -0.34489900 | -0.38475100 |
| C  | 6.32425200  | 0.08009500  | 0.58776700  |
| C  | 7.14979900  | -0.85828000 | 1.20384000  |
| C  | 7.08204400  | -2.21841700 | 0.86707000  |
| C  | 6.17043400  | -2.61604400 | -0.12136400 |
| C  | 5.33713300  | -1.69230300 | -0.75042800 |
| C  | 7.96117700  | -3.23130500 | 1.56130200  |
| S  | 4.32343200  | 0.84775200  | -1.16665400 |
| O  | 3.91877600  | 0.27705600  | -2.45522500 |
| O  | 4.95510900  | 2.16568900  | -1.06920800 |
| H  | 3.54632100  | 0.72542900  | 1.79830100  |
| H  | 3.84493600  | 2.28568600  | 1.02602000  |
| H  | 2.63405600  | -1.21411900 | -0.08455200 |
| H  | 1.33772200  | -0.18603600 | 0.52560700  |
| H  | 2.87155700  | 3.08749900  | 3.39784400  |
| H  | 1.13823300  | 2.81341100  | 3.67131100  |

|   |             |             |             |                                                            |             |             |             |
|---|-------------|-------------|-------------|------------------------------------------------------------|-------------|-------------|-------------|
| H | 2.29714200  | 1.47585600  | 3.83256200  | C                                                          | -5.88745500 | 1.15355000  | -0.27430300 |
| H | 0.41795400  | 1.46129900  | -1.77125900 | H                                                          | -6.72840400 | 1.69715800  | 0.17616800  |
| H | 1.69098900  | 1.05051200  | -2.92528600 | H                                                          | -5.11323200 | 1.88813400  | -0.51993200 |
| H | 0.06712900  | 0.32706000  | -3.12089000 | H                                                          | -6.25373400 | 0.70816900  | -1.20176300 |
| H | -0.72840000 | 4.59119600  | -2.13110900 | C                                                          | -6.50938400 | -0.90477400 | 1.01301500  |
| H | 0.81589400  | 3.88525500  | -1.38817400 | H                                                          | -7.41190300 | -0.35949900 | 1.32220300  |
| H | 6.40347000  | 1.13432100  | 0.83097400  | H                                                          | -6.77085900 | -1.49246600 | 0.12954900  |
| H | 7.86694500  | -0.52737700 | 1.95110500  | H                                                          | -6.26414700 | -1.59858200 | 1.82125800  |
| H | 6.11795200  | -3.66246200 | -0.41150200 | H                                                          | -1.53524500 | 4.22286400  | 0.42738400  |
| H | 4.65620000  | -2.00164200 | -1.53608500 |                                                            |             |             |             |
| H | 8.18012700  | -4.08457400 | 0.91123900  |                                                            |             |             |             |
| H | 8.91203300  | -2.78870800 | 1.87567300  | <b>2-Int3''</b>                                            |             |             |             |
| H | 7.47103100  | -3.62475400 | 2.46190000  | Zero-point correction= 0.717497 (Hartree/Particle)         |             |             |             |
| H | -1.94376800 | 3.02450800  | -0.73630300 | Thermal correction to Energy= 0.763740                     |             |             |             |
| P | -3.69321000 | -0.63548400 | 0.10670200  | Thermal correction to Enthalpy= 0.764684                   |             |             |             |
| C | -3.90842000 | -1.15844400 | -1.75680900 | Thermal correction to Gibbs Free Energy= 0.634777          |             |             |             |
| C | -3.28174600 | -2.22469800 | 1.15002000  | Sum of electronic and zero-point Energies= -2279.814107    |             |             |             |
| C | -5.37817400 | 0.10765500  | 0.74226600  | Sum of electronic and thermal Energies= -2279.767864       |             |             |             |
| C | -3.76412800 | 0.11660300  | -2.62294900 | Sum of electronic and thermal Enthalpies= -2279.766920     |             |             |             |
| H | -2.80943400 | 0.61488500  | -2.42497500 | Sum of electronic and thermal Free Energies= -2279.896828  |             |             |             |
| H | -3.78528100 | -0.17327200 | -3.68216200 | HF(B3LYP/6-311+G(d,p)/Lanl2dz, SMD[toluene])= -2281.044656 |             |             |             |
| H | -4.56304500 | 0.84259700  | -2.46723800 | C                                                          | 2.67655900  | 0.99042500  | -0.69904500 |
| C | -2.74544100 | -2.08268700 | -2.18320800 | C                                                          | 1.73052500  | -1.29410800 | -0.92096800 |
| H | -2.80244800 | -2.22287200 | -3.27086500 | C                                                          | 1.71985300  | 1.52372000  | 0.35071000  |
| H | -1.76165600 | -1.65771600 | -1.96458200 | C                                                          | -0.53361800 | 2.65316200  | -0.41708900 |
| H | -2.80153900 | -3.07670200 | -1.73403900 | C                                                          | 2.16093100  | 1.42976300  | 1.79753900  |
| C | -5.23664900 | -1.86070100 | -2.10571900 | C                                                          | 0.58904900  | 2.10692800  | -0.02143000 |
| H | -5.21866400 | -2.14945100 | -3.16551800 | C                                                          | 1.53884700  | -2.62557500 | -0.18817400 |
| H | -5.39539600 | -2.77241400 | -1.52365100 | O                                                          | 0.78802500  | -3.44913100 | -0.67911500 |
| H | -6.10607100 | -1.21312100 | -1.96684500 | C                                                          | 2.20050700  | -2.84591700 | 1.15441300  |
| C | -4.09627000 | -3.48953000 | 0.81228800  | Pd                                                         | -2.06732500 | 1.31514100  | -0.16014700 |
| H | -3.80426300 | -4.29680500 | 1.49808600  | C                                                          | -0.65381000 | 4.06202400  | -0.80936600 |
| H | -5.17288200 | -3.33777500 | 0.92779500  | C                                                          | -1.74536900 | 4.64253500  | -1.32683700 |
| H | -3.91116000 | -3.85050800 | -0.20197000 | N                                                          | 2.90456000  | -0.48012800 | -0.54844600 |
| C | -1.77207400 | -2.51694000 | 0.96620000  | C                                                          | 5.61554100  | -0.30666500 | -0.31637700 |
| H | -1.48637900 | -2.75876900 | -0.05684800 | C                                                          | 6.48978700  | 0.62477300  | -0.87496400 |
| H | -1.17059400 | -1.65655900 | 1.28278200  | C                                                          | 7.52666600  | 1.13720400  | -0.09350000 |
| H | -1.49826900 | -3.37229500 | 1.59931600  | C                                                          | 7.70369500  | 0.72881800  | 1.23400800  |
| C | -3.46333300 | -1.91937300 | 2.65373900  | C                                                          | 6.80927100  | -0.21354400 | 1.76921800  |
| H | -3.03707400 | -2.75120200 | 3.23005200  | C                                                          | 5.77213100  | -0.73754900 | 1.00449800  |
| H | -2.93372300 | -1.00802400 | 2.95081200  | C                                                          | 8.83986400  | 1.26739100  | 2.07047500  |
| H | -4.51104900 | -1.82876500 | 2.94991500  | S                                                          | 4.32513200  | -1.01332400 | -1.34212100 |
| C | -5.08723700 | 0.89908200  | 2.04105500  | O                                                          | 4.32906800  | -2.47454300 | -1.18979300 |
| H | -4.28533500 | 1.62923600  | 1.88451100  | O                                                          | 4.44527100  | -0.41856200 | -2.68132200 |
| H | -5.99600400 | 1.44229800  | 2.33447300  | H                                                          | 3.65325600  | 1.47342300  | -0.57489900 |
| H | -4.80284200 | 0.26387000  | 2.88014900  | H                                                          | 2.31460200  | 1.22290300  | -1.70741700 |
|   |             |             |             | H                                                          | 0.85880200  | -0.68315200 | -0.65350200 |

|   |             |             |             |                                                        |              |                    |             |
|---|-------------|-------------|-------------|--------------------------------------------------------|--------------|--------------------|-------------|
| H | 1.65940700  | -1.48623400 | -1.99921100 | C                                                      | -3.06186000  | 0.09014200         | 2.86898500  |
| H | 3.11469400  | 1.95503300  | 1.95062000  | H                                                      | -2.54485200  | 0.99416200         | 2.51774600  |
| H | 1.41695700  | 1.87098900  | 2.46641500  | H                                                      | -3.32552600  | 0.26060300         | 3.92141300  |
| H | 2.32621800  | 0.38776000  | 2.09964500  | H                                                      | -2.35610700  | -0.73953000        | 2.83832500  |
| H | 3.25671200  | -3.08258000 | 0.98826800  | C                                                      | -5.22880800  | 1.09451400         | 2.27223800  |
| H | 2.15513100  | -1.94692700 | 1.77796600  | H                                                      | -5.34360800  | 1.25757000         | 3.35189800  |
| H | 1.71753400  | -3.68700400 | 1.65682000  | H                                                      | -4.76123400  | 1.99131200         | 1.85265400  |
| H | 0.24134400  | 4.67180800  | -0.66477000 | H                                                      | -6.23305600  | 0.99564400         | 1.85508100  |
| H | -1.74760400 | 5.69314500  | -1.60363500 | C                                                      | -5.10205400  | -1.37756900        | 2.65188000  |
| H | -2.65712800 | 4.07687100  | -1.49717000 | H                                                      | -5.37001400  | -1.16093500        | 3.69513300  |
| H | 6.35421300  | 0.93563200  | -1.90526300 | H                                                      | -6.02918100  | -1.59891000        | 2.11635200  |
| H | 8.20849600  | 1.86545300  | -0.52520000 | H                                                      | -4.49056700  | -2.28308700        | 2.65929900  |
| H | 6.93175600  | -0.54232900 | 2.79844100  |                                                        |              |                    |             |
| H | 5.09097200  | -1.46916500 | 1.42515000  | <b>2-Int4''</b>                                        |              |                    |             |
| H | 9.28380300  | 2.15924500  | 1.61782300  | Zero-point correction=                                 | 0.718212     | (Hartree/Particle) |             |
| H | 8.50409300  | 1.52917500  | 3.08024300  | Thermal correction to Energy=                          | 0.764407     |                    |             |
| H | 9.63646100  | 0.51982700  | 2.17890600  | Thermal correction to Enthalpy=                        | 0.765351     |                    |             |
| H | -2.28368000 | 1.56700400  | -1.66439400 | Thermal correction to Gibbs Free Energy=               | 0.633717     |                    |             |
| P | -3.84719700 | -0.30715000 | 0.18875500  | Sum of electronic and zero-point Energies=             | -2279.812636 |                    |             |
| C | -5.40450200 | 0.01030000  | -0.92205300 | Sum of electronic and thermal Energies=                | -2279.766442 |                    |             |
| C | -3.15499300 | -2.08859300 | -0.16062500 | Sum of electronic and thermal Enthalpies=              | -2279.765497 |                    |             |
| C | -4.35840400 | -0.16428100 | 2.05971200  | Sum of electronic and thermal Free Energies=           | -2279.897132 |                    |             |
| C | -5.66583900 | 1.53503500  | -0.97756300 | HF(B3LYP/6-311+G(d,p)/LanL2dz, SMD[ <i>toluene</i> ])= | -2281.042698 |                    |             |
| H | -4.77428100 | 2.07688200  | -1.30665800 | C                                                      | 1.78403700   | 0.52423000         | 0.40452600  |
| H | -6.46813800 | 1.72452100  | -1.70305100 | C                                                      | 3.10216500   | 2.58292700         | -0.24828800 |
| H | -5.98556600 | 1.95595000  | -0.02421300 | C                                                      | 0.92070000   | 0.48275500         | -0.85473700 |
| C | -5.09097800 | -0.41740400 | -2.37310900 | C                                                      | 1.53091600   | -0.26601200        | -2.03578100 |
| H | -5.90555900 | -0.06621800 | -3.01957300 | C                                                      | 2.45218100   | 3.57997500         | 0.71822600  |
| H | -4.16183600 | 0.02950600  | -2.73995800 | O                                                      | 2.12983500   | 3.27136800         | 1.84725400  |
| H | -5.03083500 | -1.50114700 | -2.49278100 | C                                                      | 2.23575900   | 4.97679800         | 0.16141800  |
| C | -6.68947700 | -0.71152700 | -0.46676500 | N                                                      | 3.09621000   | 1.18755800         | 0.16776600  |
| H | -7.48861700 | -0.50551500 | -1.19156400 | C                                                      | 4.87089200   | -0.85752400        | 0.35516300  |
| H | -6.56690500 | -1.79649400 | -0.41624800 | C                                                      | 4.62648300   | -2.07718500        | 0.98238700  |
| H | -7.04442300 | -0.36396400 | 0.50683800  | C                                                      | 5.03333600   | -3.25890200        | 0.35763900  |
| C | -4.20222100 | -3.21698900 | -0.23993300 | C                                                      | 5.68636900   | -3.23680700        | -0.87947500 |
| H | -3.68124300 | -4.17090500 | -0.39596600 | C                                                      | 5.93074000   | -1.99130200        | -1.48404700 |
| H | -4.79315900 | -3.31246000 | 0.67520500  | C                                                      | 5.52987900   | -0.80618700        | -0.87753000 |
| H | -4.89103800 | -3.08884200 | -1.07908000 | C                                                      | 6.12737700   | -4.51393700        | -1.55494000 |
| C | -2.35843000 | -2.03803100 | -1.48918500 | S                                                      | 4.37137100   | 0.67080300         | 1.15839500  |
| H | -2.99822100 | -1.95391800 | -2.36822100 | O                                                      | 5.44773100   | 1.65505800         | 0.97872800  |
| H | -1.65933300 | -1.19608200 | -1.50100600 | O                                                      | 3.89514800   | 0.30581500         | 2.49596300  |
| H | -1.77021800 | -2.95758300 | -1.58697500 | H                                                      | 1.99898400   | -0.50273500        | 0.70654200  |
| C | -2.12813000 | -2.44835400 | 0.93679800  | H                                                      | 1.26096200   | 1.01405300         | 1.22915700  |
| H | -1.59269000 | -3.35448500 | 0.63226700  | H                                                      | 4.14126200   | 2.89455900         | -0.39710600 |
| H | -1.37616800 | -1.66134100 | 1.06064000  | H                                                      | 2.60711400   | 2.65995700         | -1.22454100 |
| H | -2.59013500 | -2.64665900 | 1.90699000  | H                                                      | 2.44480200   | 0.22839400         | -2.39428900 |

|    |             |             |             |
|----|-------------|-------------|-------------|
| H  | 1.80396700  | -1.28269600 | -1.73640200 |
| H  | 0.82719900  | -0.33154800 | -2.87046900 |
| H  | 3.12551900  | 5.34110500  | -0.36610100 |
| H  | 1.41256400  | 4.95638200  | -0.56486500 |
| H  | 1.97891200  | 5.66003600  | 0.97351600  |
| H  | 4.13548500  | -2.09291400 | 1.94941200  |
| H  | 4.84312300  | -4.21160100 | 0.84561700  |
| H  | 6.44609300  | -1.95354700 | -2.44109800 |
| H  | 5.73340800  | 0.15173800  | -1.34499400 |
| H  | 5.88171400  | -5.39236200 | -0.95051700 |
| H  | 5.64449600  | -4.63386500 | -2.53280500 |
| H  | 7.21044000  | -4.51820400 | -1.72905600 |
| C  | 0.13304200  | 1.61860300  | -1.13278000 |
| C  | -0.83216500 | 2.39276300  | -1.26169600 |
| C  | -1.62039300 | 3.55035200  | -1.52236200 |
| H  | -1.93258600 | 4.11924600  | -0.64590200 |
| C  | -2.01302200 | 3.96743400  | -2.74042500 |
| H  | -1.74020300 | 3.43171400  | -3.64488100 |
| H  | -2.61812000 | 4.86168700  | -2.85237400 |
| Pd | -1.15008700 | -0.05194700 | -0.33317700 |
| H  | -0.65776600 | -1.50432900 | -0.00410000 |
| P  | -3.36869700 | -0.72590600 | 0.23793400  |
| C  | -3.45135600 | -1.58557000 | 1.98588800  |
| C  | -3.93276800 | -2.00391400 | -1.11846700 |
| C  | -4.61437700 | 0.77805100  | 0.24357700  |
| C  | -3.22270100 | -3.35776900 | -0.89243000 |
| H  | -3.42068000 | -3.99734600 | -1.76262600 |
| H  | -2.13892000 | -3.23764500 | -0.80806300 |
| H  | -3.58904600 | -3.89233200 | -0.01317800 |
| C  | -3.43013900 | -1.49094800 | -2.49026800 |
| H  | -2.34468700 | -1.34712600 | -2.47847700 |
| H  | -3.66821500 | -2.24351800 | -3.25415500 |
| H  | -3.89247800 | -0.55312700 | -2.79943000 |
| C  | -5.45143700 | -2.26175800 | -1.20078300 |
| H  | -6.01342300 | -1.37451500 | -1.50212900 |
| H  | -5.63707100 | -3.03164800 | -1.96184600 |
| H  | -5.86977400 | -2.62774700 | -0.25978900 |
| C  | -4.72245000 | -2.42750100 | 2.22974100  |
| H  | -5.64495800 | -1.85762000 | 2.09956600  |
| H  | -4.77136500 | -3.30681400 | 1.58266200  |
| H  | -4.70775400 | -2.79317800 | 3.26523000  |
| C  | -2.21401000 | -2.49351000 | 2.18258200  |
| H  | -1.28810800 | -1.91577500 | 2.13993400  |
| H  | -2.28640400 | -2.95654200 | 3.17593100  |
| H  | -2.13946000 | -3.29707700 | 1.45007900  |
| C  | -3.35408300 | -0.51217800 | 3.09340100  |

|   |             |             |             |
|---|-------------|-------------|-------------|
| H | -3.19775300 | -1.02093400 | 4.05324700  |
| H | -2.50426200 | 0.16025000  | 2.93821300  |
| H | -4.26365800 | 0.08408300  | 3.19309200  |
| C | -4.80856400 | 1.27221600  | -1.20734800 |
| H | -5.36781500 | 2.21639500  | -1.17898900 |
| H | -3.85428100 | 1.47507100  | -1.70228600 |
| H | -5.38626300 | 0.57743400  | -1.82079400 |
| C | -6.00255600 | 0.50359400  | 0.85817000  |
| H | -6.62095500 | 1.40456400  | 0.74572800  |
| H | -6.53199600 | -0.31674100 | 0.36784500  |
| H | -5.95023000 | 0.28607900  | 1.92769200  |
| C | -3.96022400 | 1.95257800  | 1.01037800  |
| H | -2.95829400 | 2.16828200  | 0.63041300  |
| H | -4.57788300 | 2.84897400  | 0.86609900  |
| H | -3.88609200 | 1.78028400  | 2.08374000  |

## 2-Int5''

Zero-point correction= 0.718211 (Hartree/Particle)

Thermal correction to Energy= 0.764406

Thermal correction to Enthalpy= 0.765351

Thermal correction to Gibbs Free Energy= 0.633705

Sum of electronic and zero-point Energies= -2279.812637

Sum of electronic and thermal Energies= -2279.766442

Sum of electronic and thermal Enthalpies= -2279.765498

Sum of electronic and thermal Free Energies= -2279.897144

HF(B3LYP/6-311+G(d,p)/Lanl2dz, SMD[toluene])= -2281.046233

|   |             |             |             |
|---|-------------|-------------|-------------|
| C | -5.77219200 | -0.59675500 | -0.24811800 |
| C | -5.75278600 | -1.17319000 | 1.02588500  |
| C | -6.68837900 | -0.76158500 | 1.96889600  |
| C | -7.65037700 | 0.21589400  | 1.66064900  |
| C | -7.65487700 | 0.76451300  | 0.37284800  |
| C | -6.72330200 | 0.36373400  | -0.58703500 |
| C | -8.64790400 | 0.66220000  | 2.70291200  |
| S | -4.60256800 | -1.15462800 | -1.48545700 |
| O | -4.98276600 | -0.54550700 | -2.76767800 |
| O | -4.45575600 | -2.61202100 | -1.37166700 |
| H | -5.02467500 | -1.94167700 | 1.26360700  |
| H | -6.67967500 | -1.20914100 | 2.95987800  |
| H | -8.39937900 | 1.51228800  | 0.11202100  |
| H | -6.73602800 | 0.77671500  | -1.59001500 |
| H | -8.16018800 | 1.25674400  | 3.48617400  |
| H | -9.43883600 | 1.27756600  | 2.26374500  |
| H | -9.11958100 | -0.19533000 | 3.19649300  |
| C | -2.98935100 | 0.98388100  | -1.06561300 |
| C | -0.76520000 | -0.97849800 | -0.40525100 |
| C | -2.14221000 | 1.58441400  | 0.04218300  |

|    |             |             |             |                                                            |             |             |             |
|----|-------------|-------------|-------------|------------------------------------------------------------|-------------|-------------|-------------|
| H  | -3.99613100 | 1.41432700  | -1.03325800 | H                                                          | 5.75171900  | -2.57188700 | -1.23731500 |
| H  | -2.56477400 | 1.20196300  | -2.05286200 | C                                                          | 3.10735000  | -2.14376800 | -1.87256400 |
| N  | -3.13393300 | -0.49469200 | -0.89634300 | H                                                          | 2.14989800  | -1.61896400 | -1.88010100 |
| C  | -1.94769500 | -1.24620500 | -1.32944700 | H                                                          | 3.76006800  | -1.67593000 | -2.60886900 |
| H  | -1.63851300 | -0.99001700 | -2.35169100 | H                                                          | 2.92854100  | -3.17437400 | -2.20868700 |
| H  | -2.19260900 | -2.31353000 | -1.28673400 | C                                                          | 5.39262700  | 0.21641900  | -2.10634500 |
| O  | 0.30568800  | -0.63787200 | -0.90521400 | H                                                          | 4.42774400  | 0.49177200  | -2.54423300 |
| C  | -0.92296500 | -1.26820500 | 1.06551900  | H                                                          | 6.15699500  | 0.85474300  | -2.56820600 |
| H  | -0.60702100 | -2.30679900 | 1.24185300  | H                                                          | 5.62600600  | -0.81326900 | -2.38504600 |
| H  | -0.27804800 | -0.60901300 | 1.64994000  | C                                                          | 5.34347300  | 1.98827000  | -0.40324700 |
| H  | -1.96128700 | -1.17184800 | 1.38579200  | H                                                          | 6.23061200  | 2.43271400  | -0.87433200 |
| C  | -2.81641700 | 1.73980100  | 1.39303600  | H                                                          | 4.45752900  | 2.39477200  | -0.89520900 |
| H  | -2.10555700 | 2.07641800  | 2.15271900  | H                                                          | 5.32742600  | 2.31233700  | 0.63709000  |
| H  | -3.63265000 | 2.47535000  | 1.34340600  | C                                                          | 6.77968100  | -0.03459800 | -0.03287700 |
| H  | -3.26643700 | 0.79638800  | 1.72993700  | H                                                          | 6.90898000  | -1.11611000 | -0.11050000 |
| C  | -0.90866600 | 2.01147400  | -0.19282600 | H                                                          | 7.58261600  | 0.43337000  | -0.61835800 |
| C  | 0.31958600  | 2.38821200  | -0.43608100 | H                                                          | 6.93773400  | 0.25317800  | 1.00946200  |
| C  | 0.55897900  | 3.75555400  | -0.93039500 | H                                                          | 2.58119900  | 2.14209400  | 0.39774200  |
| H  | -0.34203000 | 4.35443400  | -1.08725200 |                                                            |             |             |             |
| C  | 1.73754800  | 4.32558000  | -1.21734800 | <b>2-Ts3''</b>                                             |             |             |             |
| H  | 2.67393000  | 3.79101400  | -1.09525800 | Zero-point correction= 0.7209381 (Hartree/Particle)        |             |             |             |
| H  | 1.79034000  | 5.34781800  | -1.58266200 | Thermal correction to Energy= 0.764569                     |             |             |             |
| Pd | 1.81944300  | 0.93212700  | -0.15267500 | Thermal correction to Enthalpy= 0.765513                   |             |             |             |
| P  | 3.85602100  | -0.37603200 | 0.23822200  | Thermal correction to Gibbs Free Energy= 0.642832          |             |             |             |
| C  | 5.42080600  | 0.45338000  | -0.57950900 | Sum of electronic and zero-point Energies= -2279.797576    |             |             |             |
| C  | 4.14062500  | -0.45806700 | 2.16448700  | Sum of electronic and thermal Energies= -2279.753945       |             |             |             |
| C  | 3.72442800  | -2.19807900 | -0.45262700 | Sum of electronic and thermal Enthalpies= -2279.753001     |             |             |             |
| C  | 4.63161000  | 0.91404700  | 2.67908700  | Sum of electronic and thermal Free Energies= -2279.875682  |             |             |             |
| H  | 3.98153500  | 1.72890100  | 2.34712400  | HF(B3LYP/6-311+G(d,p)/Lanl2dz, SMD[toluene])= -2281.024128 |             |             |             |
| H  | 4.60786300  | 0.89783300  | 3.77667800  | C                                                          | 5.83276300  | -0.64181100 | 0.35825300  |
| H  | 5.65921500  | 1.13907500  | 2.38532800  | C                                                          | 6.24674500  | -0.86409100 | -0.95900300 |
| C  | 5.12213700  | -1.54042500 | 2.65901700  | C                                                          | 7.36283300  | -0.18902400 | -1.44132900 |
| H  | 6.11972100  | -1.43731300 | 2.22497300  | C                                                          | 8.08070900  | 0.70412000  | -0.62721200 |
| H  | 5.22931600  | -1.44888700 | 3.74846000  | C                                                          | 7.64850100  | 0.90107000  | 0.68935700  |
| H  | 4.76684500  | -2.55423800 | 2.45868100  | C                                                          | 6.52978900  | 0.23168800  | 1.19053700  |
| C  | 2.76220300  | -0.68228000 | 2.83199600  | C                                                          | 9.29849900  | 1.41800000  | -1.16476200 |
| H  | 2.88890700  | -0.64570200 | 3.92248600  | S                                                          | 4.41308000  | -1.53325900 | 0.99572700  |
| H  | 2.05937100  | 0.10644600  | 2.54351600  | O                                                          | 4.34350700  | -1.27712600 | 2.44282800  |
| H  | 2.31458500  | -1.64651500 | 2.58787400  | O                                                          | 4.44804700  | -2.90931900 | 0.48731700  |
| C  | 2.72407400  | -2.99588800 | 0.41283100  | H                                                          | 5.70343500  | -1.56265200 | -1.58674400 |
| H  | 2.52234700  | -3.95356600 | -0.08476400 | H                                                          | 7.68840900  | -0.35868300 | -2.46504800 |
| H  | 3.10764700  | -3.22717500 | 1.40901200  | H                                                          | 8.19464800  | 1.58380600  | 1.33547200  |
| H  | 1.77129700  | -2.47001700 | 0.51377600  | H                                                          | 6.20164500  | 0.37257200  | 2.21487500  |
| C  | 5.04441300  | -2.99415900 | -0.51955900 | H                                                          | 9.07688000  | 1.92889700  | -2.10933800 |
| H  | 5.54523100  | -3.07221900 | 0.44831700  | H                                                          | 9.67114700  | 2.16430700  | -0.45661300 |
| H  | 4.82149900  | -4.01604500 | -0.85586600 | H                                                          | 10.11440500 | 0.71185500  | -1.36499400 |

|    |             |             |             |                                                         |              |                    |             |
|----|-------------|-------------|-------------|---------------------------------------------------------|--------------|--------------------|-------------|
| C  | 2.76450900  | 0.57615000  | 0.64904200  | C                                                       | -4.80525700  | -3.04811500        | 0.56575200  |
| C  | 0.79476800  | -0.67326600 | -0.54536500 | H                                                       | -5.53823600  | -2.98423300        | -0.24187200 |
| C  | 1.78440500  | 1.08704500  | -0.40373000 | H                                                       | -4.52057800  | -4.10401700        | 0.66471600  |
| H  | 3.66651800  | 1.19595800  | 0.70883700  | H                                                       | -5.29683400  | -2.76514300        | 1.49964900  |
| H  | 2.29873400  | 0.53675500  | 1.64231000  | C                                                       | -2.57239800  | -2.38125100        | 1.50976500  |
| N  | 3.14161700  | -0.77028100 | 0.17172100  | H                                                       | -1.62274600  | -1.86959000        | 1.34023000  |
| C  | 1.91748000  | -1.58126400 | 0.02226200  | H                                                       | -3.00273000  | -2.03160800        | 2.44756200  |
| H  | 1.55510800  | -1.95477400 | 0.98814900  | H                                                       | -2.36167700  | -3.45241600        | 1.63311900  |
| H  | 2.13000600  | -2.42820300 | -0.63474500 | C                                                       | -4.67513300  | -0.13194100        | 2.68078600  |
| O  | -0.25116100 | -0.63118300 | 0.21958700  | H                                                       | -3.62530800  | 0.09456700         | 2.89184700  |
| C  | 0.56703700  | -0.78723700 | -2.04947000 | H                                                       | -5.28351300  | 0.41098000         | 3.41556300  |
| H  | 0.05637300  | -1.74048500 | -2.24227100 | H                                                       | -4.84716900  | -1.19699100        | 2.84759600  |
| H  | -0.08157400 | 0.01846100  | -2.40587900 | C                                                       | -5.05179400  | 1.88264400         | 1.32341100  |
| H  | 1.49698100  | -0.78653900 | -2.62286600 | H                                                       | -5.80654300  | 2.21677400         | 2.04783100  |
| C  | 2.46834800  | 1.49840800  | -1.71326900 | H                                                       | -4.07656000  | 2.23823700         | 1.66276000  |
| H  | 1.74020900  | 1.71368500  | -2.50026400 | H                                                       | -5.27639900  | 2.36322200         | 0.37107600  |
| H  | 3.07326100  | 2.40318200  | -1.56491100 | C                                                       | -6.55146000  | -0.10346000        | 1.01487000  |
| H  | 3.14131000  | 0.70817200  | -2.05890000 | H                                                       | -6.66654600  | -1.18683600        | 0.94675400  |
| C  | 0.76068000  | 1.92138800  | 0.02292800  | H                                                       | -7.17002400  | 0.23792700         | 1.85538300  |
| C  | -0.29889900 | 2.51182700  | 0.37697900  | H                                                       | -6.97135800  | 0.34205300         | 0.10969600  |
| C  | -0.60099500 | 3.81327500  | 0.95737300  | H                                                       | -2.76362000  | 2.04041900         | -0.13377700 |
| H  | 0.27234000  | 4.35371400  | 1.32542000  |                                                         |              |                    |             |
| C  | -1.79557400 | 4.40844500  | 1.06583100  | <b>1a</b>                                               |              |                    |             |
| H  | -2.70720700 | 3.93608400  | 0.71683900  | Zero-point correction=                                  | 0.354079     | (Hartree/Particle) |             |
| H  | -1.87923700 | 5.40015500  | 1.50113800  | Thermal correction to Energy=                           | 0.377436     |                    |             |
| Pd | -1.78323700 | 0.86140300  | 0.01878500  | Thermal correction to Enthalpy=                         | 0.378380     |                    |             |
| P  | -3.81940600 | -0.32955600 | -0.04971700 | Thermal correction to Gibbs Free Energy=                | 0.297580     |                    |             |
| C  | -5.09288300 | 0.33773700  | 1.26911100  | Sum of electronic and zero-point Energies=              | -1338.242270 |                    |             |
| C  | -4.57843100 | -0.10855900 | -1.82913500 | Sum of electronic and thermal Energies=                 | -1338.218913 |                    |             |
| C  | -3.52559900 | -2.22729200 | 0.29829700  | Sum of electronic and thermal Enthalpies=               | -1338.217969 |                    |             |
| C  | -5.18052200 | 1.30580900  | -1.98284900 | Sum of electronic and thermal Free Energies=            | -1338.298770 |                    |             |
| H  | -4.46240300 | 2.08551900  | -1.71320100 | HF( $\omega$ b97xd/6-311+G(d,p)/LanL2dz, SMD[toluene])= | -1338.621892 |                    |             |
| H  | -5.44448600 | 1.45098400  | -3.03840900 | N                                                       | 0.31363100   | -0.64162900        | 0.08843700  |
| H  | -6.09423400 | 1.44969400  | -1.40211900 | C                                                       | 0.69171600   | -0.17791300        | -1.23917100 |
| C  | -5.66039300 | -1.13892000 | -2.21503500 | H                                                       | -0.03331500  | -0.54997600        | -1.97111900 |
| H  | -6.51274900 | -1.13441900 | -1.53118000 | H                                                       | 0.68956200   | 0.91700000         | -1.28618500 |
| H  | -6.04214500 | -0.88835200 | -3.21370500 | C                                                       | 2.05534900   | -0.67410700        | -1.72890100 |
| H  | -5.27031100 | -2.15774000 | -2.26918700 | C                                                       | 0.71442900   | 0.22077600         | 1.20893600  |
| C  | -3.41813100 | -0.18581700 | -2.85011400 | H                                                       | 0.12844200   | -0.06899600        | 2.08420700  |
| H  | -3.82418400 | -0.00742600 | -3.85486900 | H                                                       | 0.49021700   | 1.26690900         | 0.96582900  |
| H  | -2.66654200 | 0.58261000  | -2.64352800 | C                                                       | 2.18731000   | 0.03636100         | 1.50829200  |
| H  | -2.91668900 | -1.15376300 | -2.86485100 | C                                                       | 3.06813100   | 0.85969600         | 0.99000400  |
| C  | -2.78249800 | -2.85145800 | -0.90268200 | C                                                       | 3.90900400   | 1.65362800         | 0.42238700  |
| H  | -2.49347700 | -3.87449700 | -0.62973800 | C                                                       | 4.72494000   | 1.95482700         | -0.76978700 |
| H  | -3.39658300 | -2.92174900 | -1.80343100 | C                                                       | 4.71694500   | 2.88918100         | 0.43366800  |
| H  | -1.86609300 | -2.30114900 | -1.12785600 | H                                                       | 4.19938900   | 2.25411400         | -1.67212000 |

|                                                           |             |             |             |    |             |             |             |
|-----------------------------------------------------------|-------------|-------------|-------------|----|-------------|-------------|-------------|
| H                                                         | 5.61188700  | 1.35070800  | -0.94274900 | H  | 6.48440700  | 1.84916300  | 0.62782200  |
| H                                                         | 5.60063300  | 2.91572700  | 1.06693300  | H  | 5.37814600  | 2.06462100  | -0.73728900 |
| H                                                         | 4.19636500  | 3.83973000  | 0.34372300  | C  | 6.25335200  | 0.13321100  | -0.64923900 |
| S                                                         | -1.06622600 | -1.56089900 | 0.24306100  | C  | 5.67274000  | -1.06379500 | -0.49777800 |
| O                                                         | -1.09691500 | -2.43978000 | -0.91624600 | C  | 5.90216000  | -2.33238000 | -1.20360900 |
| O                                                         | -1.06377900 | -2.07887900 | 1.60116100  | C  | 7.02468800  | -2.83336300 | -1.72278000 |
| C                                                         | -2.42913200 | -0.42366100 | 0.09501900  | C  | 4.56106300  | -3.04941100 | -1.19030500 |
| C                                                         | -2.88642100 | 0.24933800  | 1.22556800  | S  | 3.93931600  | 2.30866600  | 1.79664400  |
| C                                                         | -2.98367800 | -0.17332300 | -1.15693000 | O  | 3.06988400  | 1.73129400  | 2.80692500  |
| C                                                         | -3.89940100 | 1.18971200  | 1.09071300  | O  | 5.05016100  | 3.17719000  | 2.14915300  |
| H                                                         | -2.47139900 | 0.01617500  | 2.20046200  | C  | 2.92138300  | 3.15341000  | 0.60673200  |
| C                                                         | -3.99686200 | 0.77081900  | -1.27306200 | C  | 3.45662500  | 4.21553400  | -0.11616700 |
| H                                                         | -2.64376000 | -0.73351300 | -2.02151400 | C  | 1.63016500  | 2.68974100  | 0.35213500  |
| C                                                         | -4.46381200 | 1.47019900  | -0.15733900 | C  | 2.68763500  | 4.81828900  | -1.10734000 |
| H                                                         | -4.26549500 | 1.70879300  | 1.97248300  | H  | 4.45383500  | 4.57589000  | 0.11401700  |
| H                                                         | -4.43849900 | 0.96059400  | -2.24758300 | C  | 0.88363400  | 3.30008800  | -0.64495800 |
| C                                                         | -5.54153600 | 2.51437200  | -0.29581200 | H  | 1.20759900  | 1.87528300  | 0.93200700  |
| H                                                         | -6.17591100 | 2.55302100  | 0.59468200  | C  | 1.39703500  | 4.36730300  | -1.38945900 |
| H                                                         | -5.10029600 | 3.50918500  | -0.42955400 | H  | 3.09863200  | 5.65467100  | -1.66621800 |
| H                                                         | -6.18002400 | 2.31732400  | -1.16172300 | H  | -0.12040600 | 2.94173100  | -0.84834900 |
| C                                                         | 2.46993800  | -2.06600600 | -1.32806400 | C  | 0.56140400  | 5.00366200  | -2.47013700 |
| H                                                         | 2.82812600  | -2.05124000 | -0.29381400 | H  | 1.06010500  | 5.87378800  | -2.90628800 |
| H                                                         | 1.61737000  | -2.75147100 | -1.36444700 | H  | 0.36082900  | 4.28956600  | -3.27724300 |
| H                                                         | 3.27474400  | -2.40665400 | -1.98152700 | H  | -0.40756700 | 5.33009500  | -2.07619500 |
| C                                                         | 2.54559600  | -1.16641000 | 2.34445800  | C  | 4.64081600  | -1.90590600 | 1.67229000  |
| H                                                         | 2.21855400  | -1.02621200 | 3.38225600  | H  | 5.27993300  | -2.79091900 | 1.58748500  |
| H                                                         | 2.02623800  | -2.05472100 | 1.96518200  | H  | 5.12184100  | -1.19076200 | 2.34445200  |
| H                                                         | 3.62204700  | -1.35301800 | 2.34362800  | H  | 3.67673900  | -2.20623800 | 2.09656100  |
| O                                                         | 2.70747000  | 0.02958000  | -2.46928500 | C  | 7.42631700  | 0.40312500  | -1.54816800 |
| <b>PdL</b>                                                |             |             |             | H  | 7.40962100  | -0.24636200 | -2.42910000 |
| Zero-point correction= 0.682662 (Hartree/Particle)        |             |             |             | H  | 7.42643300  | 1.44508800  | -1.88660600 |
| Thermal correction to Energy= 0.718445                    |             |             |             | H  | 8.37507400  | 0.23227200  | -1.02438000 |
| Thermal correction to Enthalpy= 0.719389                  |             |             |             | Pd | 1.42390300  | -2.15809900 | -0.46331400 |
| Thermal correction to Gibbs Free Energy= 0.619109         |             |             |             | P  | -0.83025400 | -1.84871400 | -0.34991400 |
| Sum of electronic and zero-point Energies= -1599.317596   |             |             |             | C  | -1.71111300 | -3.42457600 | 0.23693300  |
| Sum of electronic and thermal Energies= -1599.281812      |             |             |             | C  | -1.44309800 | -1.32762900 | -2.07382400 |
| Sum of electronic and thermal Enthalpies= -1599.280868    |             |             |             | C  | -0.65100800 | -0.04390600 | -2.38586500 |
| Sum of electronic and thermal Free Energies= -1599.381149 |             |             |             | H  | -0.86161400 | 0.75181400  | -1.66702900 |
| HF(6-311+G(d,p)/Lanl2dz, SMD[toluene])= -1600.333256      |             |             |             | H  | 0.42644800  | -0.23891900 | -2.35993100 |
| N                                                         | 4.60091700  | 1.02803000  | 0.94934400  | H  | -0.91977000 | 0.32195300  | -3.38527500 |
| C                                                         | 3.64969600  | 0.05016500  | 0.42489500  | C  | -0.97941500 | -2.40955000 | -3.06751000 |
| H                                                         | 2.81609100  | -0.04680700 | 1.12156300  | H  | -1.08068200 | -2.01799700 | -4.08820100 |
| H                                                         | 3.25664700  | 0.34001900  | -0.56078400 | H  | 0.06816000  | -2.68769800 | -2.90424200 |
| C                                                         | 4.40768300  | -1.26395400 | 0.30790200  | H  | -1.59750800 | -3.31066800 | -3.00300400 |
| C                                                         | 5.70101600  | 1.35399300  | 0.04687200  | C  | -2.93801000 | -1.09116400 | -2.31490900 |
|                                                           |             |             |             | H  | -3.07202600 | -0.69701300 | -3.33178000 |



|   |             |             |             |                                                         |              |                    |             |
|---|-------------|-------------|-------------|---------------------------------------------------------|--------------|--------------------|-------------|
| H | -3.51665100 | -2.01416000 | -2.25219000 | H                                                       | -7.62963000  | 3.09392900         | -1.28207000 |
| H | -3.37379800 | -0.37676600 | -1.62232600 | C                                                       | -2.84102800  | 2.39510800         | -0.67952200 |
| C | -1.01016900 | -4.64074800 | -0.39670900 | H                                                       | -1.88654500  | 1.93861600         | -0.40207700 |
| H | -1.47203200 | -5.55904500 | -0.00958200 | C                                                       | -2.95334500  | 3.71720200         | 0.09380100  |
| H | -1.10166800 | -4.65776800 | -1.48551900 | H                                                       | -2.15254500  | 4.40493800         | -0.20475400 |
| H | 0.05657900  | -4.65033700 | -0.14994000 | H                                                       | -3.91418100  | 4.20354900         | -0.11143900 |
| C | -3.20579600 | -3.49336200 | -0.08896000 | H                                                       | -2.87416300  | 3.56009500         | 1.17268400  |
| H | -3.36534800 | -3.75899700 | -1.13873000 | C                                                       | -2.81604800  | 2.67533300         | -2.18829000 |
| H | -3.68300800 | -4.27280400 | 0.51883200  | H                                                       | -3.64799200  | 3.32150900         | -2.49031400 |
| H | -3.72112100 | -2.54951300 | 0.09826900  | H                                                       | -1.89050800  | 3.19567100         | -2.46115800 |
| C | -1.47823700 | -3.52426800 | 1.75473200  | H                                                       | -2.87192500  | 1.75404800         | -2.77361600 |
| H | -0.40804100 | -3.47714900 | 1.98689900  | C                                                       | -4.67001800  | -1.37150800        | 2.26585600  |
| H | -1.97476900 | -2.72960400 | 2.31591700  | H                                                       | -3.64417400  | -1.74673700        | 2.28547700  |
| H | -1.86342600 | -4.48670500 | 2.11461000  | C                                                       | -5.61633200  | -2.57797900        | 2.18932900  |
| C | -1.23255700 | -0.53551700 | 0.97313900  | H                                                       | -5.30132100  | -3.33830600        | 2.91202600  |
| C | -2.35315400 | 0.27250000  | 1.31175000  | H                                                       | -6.64413300  | -2.29577700        | 2.44592500  |
| C | -0.09780600 | -0.39979200 | 1.80144000  | H                                                       | -5.63127900  | -3.03716300        | 1.19752600  |
| C | -2.23857000 | 1.16098200  | 2.39687000  | C                                                       | -4.91679000  | -0.63517400        | 3.59381400  |
| C | -0.01183600 | 0.46839400  | 2.88074600  | H                                                       | -5.91245000  | -0.17608300        | 3.59526600  |
| H | 0.76707500  | -1.01601900 | 1.56339000  | H                                                       | -4.86512500  | -1.33984600        | 4.43179200  |
| C | -1.09907100 | 1.27623400  | 3.17664500  | H                                                       | -4.17685200  | 0.14886200         | 3.76822600  |
| H | -3.09773500 | 1.78622500  | 2.62198600  |                                                         |              |                    |             |
| H | 0.91041300  | 0.53347300  | 3.44833000  | <b>3-Int1-a</b>                                         |              |                    |             |
| O | 3.66103200  | -2.15957000 | -0.53308800 | Zero-point correction=                                  | 1.038966     | (Hartree/Particle) |             |
| H | 7.03076900  | -3.80201100 | -2.21585700 | Thermal correction to Energy=                           | 1.099692     |                    |             |
| H | 7.97440600  | -2.31553200 | -1.65120500 | Thermal correction to Enthalpy=                         | 1.100636     |                    |             |
| H | 4.16660400  | -3.23511700 | -2.19239600 | Thermal correction to Gibbs Free Energy=                | 0.940254     |                    |             |
| H | 4.61083300  | -4.00154000 | -0.64694900 | Sum of electronic and zero-point Energies=              | -2937.565478 |                    |             |
| H | -1.06506100 | 1.98701000  | 3.99673600  | Sum of electronic and thermal Energies=                 | -2937.504751 |                    |             |
| C | -3.70504400 | 0.37866900  | 0.65236500  | Sum of electronic and thermal Enthalpies=               | -2937.503807 |                    |             |
| C | -3.93852500 | 1.42258500  | -0.26998600 | Sum of electronic and thermal Free Energies=            | -2937.664189 |                    |             |
| C | -4.79098200 | -0.40605500 | 1.09194400  | HF( $\omega$ b97xd/6-311+G(d,p)/LanL2dz, SMD[toluene])= | -2939.237560 |                    |             |
| C | -5.21122200 | 1.58697600  | -0.81053300 | N                                                       | -5.52814400  | 0.78657100         | 0.13428400  |
| C | -6.04250500 | -0.21855600 | 0.50045500  | C                                                       | -4.70097200  | 0.15699200         | 1.15813000  |
| C | -6.27277500 | 0.75677400  | -0.46236900 | H                                                       | -5.33809100  | -0.18600600        | 1.98060300  |
| H | -5.37687600 | 2.38233300  | -1.53266400 | H                                                       | -4.17031900  | -0.71200800        | 0.75308700  |
| H | -6.87470200 | -0.84296400 | 0.81398000  | C                                                       | -3.67317700  | 1.09672300         | 1.79354400  |
| C | -7.63882600 | 0.91751900  | -1.10273800 | C                                                       | -5.04444400  | 0.63790500         | -1.24695100 |
| H | -8.30337900 | 0.17159500  | -0.64739200 | H                                                       | -5.83186300  | 0.99582800         | -1.91419600 |
| C | -7.57894300 | 0.62988700  | -2.60926000 | H                                                       | -4.84777600  | -0.42090300        | -1.46318500 |
| H | -6.94092100 | 1.35915200  | -3.12219200 | C                                                       | -3.79333200  | 1.46900500         | -1.44419400 |
| H | -7.16920900 | -0.36683400 | -2.80244100 | C                                                       | -2.61741900  | 0.90737900         | -1.28585300 |
| H | -8.57846000 | 0.68590000  | -3.05516900 | C                                                       | -1.49976900  | 0.30104800         | -1.07742600 |
| C | -8.23774800 | 2.30302100  | -0.82768300 | C                                                       | -0.49130700  | -0.10827600        | -0.08753400 |
| H | -9.24734100 | 2.37725800  | -1.24724400 | C                                                       | -0.34137900  | -0.42029400        | -1.61971900 |
| H | -8.29573000 | 2.50045700  | 0.24758900  | H                                                       | -0.77307300  | -0.91777300        | 0.58155200  |

|    |             |             |             |   |             |             |             |
|----|-------------|-------------|-------------|---|-------------|-------------|-------------|
| H  | 0.10946300  | 0.68415400  | 0.35726300  | H | 2.90227200  | -4.52238500 | -1.01086800 |
| H  | 0.36744100  | 0.16770100  | -2.19810700 | H | 2.54609100  | -3.18822700 | -2.11102000 |
| H  | -0.48659700 | -1.44487600 | -1.95385900 | C | 5.63894600  | -4.06829200 | -0.84609200 |
| S  | -7.17808500 | 0.81750200  | 0.38147700  | H | 5.31466700  | -4.76887800 | -0.07255000 |
| O  | -7.36906800 | 1.12171200  | 1.79128900  | H | 5.89409900  | -4.66385000 | -1.73240500 |
| O  | -7.73479200 | 1.65455000  | -0.66762200 | H | 6.56243200  | -3.58721600 | -0.51402500 |
| C  | -7.73105300 | -0.85222000 | 0.10712400  | C | 5.06159800  | -2.19452300 | -2.38496400 |
| C  | -8.00020400 | -1.27912900 | -1.19186400 | H | 4.28966800  | -1.50195100 | -2.72877400 |
| C  | -7.82855200 | -1.73148400 | 1.18194100  | H | 5.94867900  | -1.61703900 | -2.10763400 |
| C  | -8.35721200 | -2.60359400 | -1.40918000 | H | 5.32947800  | -2.84038700 | -3.23106500 |
| H  | -7.95580200 | -0.57380000 | -2.01513200 | C | 5.16316800  | -0.56035600 | 0.28438000  |
| C  | -8.18826600 | -3.05352600 | 0.94570200  | C | 4.85978800  | 0.81787100  | 0.17274800  |
| H  | -7.65216300 | -1.37414400 | 2.19094700  | C | 6.50973700  | -0.91692700 | 0.46243000  |
| C  | -8.44959800 | -3.51076900 | -0.34849000 | C | 5.90894600  | 1.74813000  | 0.23770900  |
| H  | -8.57731400 | -2.93757600 | -2.41964800 | C | 7.53478100  | 0.01701300  | 0.52937300  |
| H  | -8.27499800 | -3.73962000 | 1.78386400  | H | 6.77167400  | -1.96303200 | 0.54856300  |
| C  | -8.80873800 | -4.95245100 | -0.60152000 | C | 7.23119700  | 1.36754400  | 0.41356500  |
| H  | -9.52072900 | -5.04663500 | -1.42711000 | H | 5.66241400  | 2.80181100  | 0.14028000  |
| H  | -7.91639300 | -5.53123200 | -0.86842400 | H | 8.56045900  | -0.31233600 | 0.66650900  |
| H  | -9.25054800 | -5.41609900 | 0.28521800  | O | -2.60028400 | 0.65798200  | 2.14993400  |
| C  | -4.10070000 | 2.52331600  | 2.01713800  | H | 8.01388600  | 2.11912000  | 0.45678100  |
| H  | -4.08812200 | 3.05793400  | 1.06247700  | C | 3.50412600  | 1.44802800  | -0.02123300 |
| H  | -5.12883500 | 2.56420600  | 2.39163400  | C | 3.02861200  | 1.71378700  | -1.32276000 |
| H  | -3.40912900 | 3.00774400  | 2.70845000  | C | 2.81434800  | 1.97444400  | 1.08601200  |
| C  | -4.00159700 | 2.92800300  | -1.76106300 | C | 1.85221000  | 2.44417100  | -1.47880800 |
| H  | -4.41082200 | 3.04430300  | -2.77254000 | C | 1.64471200  | 2.70861000  | 0.87866500  |
| H  | -4.73202900 | 3.36789900  | -1.07121800 | C | 1.13349800  | 2.94226800  | -0.39317600 |
| H  | -3.06821900 | 3.49252400  | -1.70123600 | H | 1.48034000  | 2.64395800  | -2.48240800 |
| Pd | 1.82191700  | -1.04865400 | -0.32660700 | H | 1.11654400  | 3.09697600  | 1.74344100  |
| P  | 3.86335100  | -1.88886600 | 0.12913800  | C | -0.13814700 | 3.73895000  | -0.63552400 |
| C  | 4.54148000  | -3.06449700 | -1.23077000 | H | -0.65813700 | 3.25295000  | -1.47288400 |
| C  | 3.91239400  | -2.79897300 | 1.80784200  | C | -1.09852800 | 3.74602700  | 0.55546100  |
| C  | 3.20790500  | -1.86970000 | 2.80732700  | H | -1.33395100 | 2.73250400  | 0.89662000  |
| H  | 3.76291300  | -0.93761500 | 2.94424200  | H | -0.68396100 | 4.30416600  | 1.40334300  |
| H  | 2.19704400  | -1.62137000 | 2.46931800  | H | -2.03579400 | 4.24049300  | 0.27750900  |
| H  | 3.14072000  | -2.36447600 | 3.78522500  | C | 0.20536900  | 5.17397900  | -1.06312500 |
| C  | 3.06432100  | -4.07538200 | 1.68281800  | H | 0.85212700  | 5.18198800  | -1.94674000 |
| H  | 2.88981500  | -4.49105700 | 2.68359700  | H | -0.70402000 | 5.73968600  | -1.29771600 |
| H  | 2.09084300  | -3.85660700 | 1.22971000  | H | 0.73337400  | 5.69579000  | -0.25624300 |
| H  | 3.55721900  | -4.85167100 | 1.09020700  | C | 3.32268000  | 1.80468000  | 2.50861300  |
| C  | 5.28619600  | -3.14656300 | 2.39948500  | H | 4.08769400  | 1.02301100  | 2.49807400  |
| H  | 5.13497800  | -3.68885200 | 3.34200700  | C | 3.99711500  | 3.09217500  | 3.00435700  |
| H  | 5.88983200  | -3.78630300 | 1.75192800  | H | 3.28833200  | 3.92874400  | 2.99666000  |
| H  | 5.86187700  | -2.24615400 | 2.63254100  | H | 4.36198800  | 2.96544400  | 4.03022200  |
| C  | 3.33652800  | -3.86280500 | -1.76698100 | H | 4.84801600  | 3.36397300  | 2.37175300  |
| H  | 3.66254200  | -4.48661400 | -2.61015400 | C | 2.21628300  | 1.36867300  | 3.47821300  |

|                                                                               |            |             |             |    |             |             |             |
|-------------------------------------------------------------------------------|------------|-------------|-------------|----|-------------|-------------|-------------|
| H                                                                             | 1.63460200 | 0.53822900  | 3.06840500  | C  | 9.07950500  | 1.81701400  | 1.34271900  |
| H                                                                             | 2.65234600 | 1.04849200  | 4.43115400  | C  | 9.37624100  | 3.16461400  | -1.07574600 |
| H                                                                             | 1.52290400 | 2.18873600  | 3.69637800  | H  | 9.22126200  | 1.22514600  | -2.00494900 |
| C                                                                             | 3.81055500 | 1.29406600  | -2.55727900 | C  | 9.24685800  | 3.19676400  | 1.32388300  |
| H                                                                             | 4.58320600 | 0.58953200  | -2.23944000 | H  | 8.98993500  | 1.28050800  | 2.28131900  |
| C                                                                             | 2.94378700 | 0.58098800  | -3.60034600 | C  | 9.39440800  | 3.89017600  | 0.11951700  |
| H                                                                             | 2.18386700 | 1.24630800  | -4.02680200 | H  | 9.49999000  | 3.68684500  | -2.02072800 |
| H                                                                             | 3.56497000 | 0.22189100  | -4.42896700 | H  | 9.26857300  | 3.74360900  | 2.26271300  |
| H                                                                             | 2.43541900 | -0.28057600 | -3.15200400 | C  | 9.60708800  | 5.38224900  | 0.10977100  |
| C                                                                             | 4.52497700 | 2.50728200  | -3.16960300 | H  | 10.67749000 | 5.61913300  | 0.13256300  |
| H                                                                             | 5.12144800 | 2.20713400  | -4.03885900 | H  | 9.18788700  | 5.83910600  | -0.79175800 |
| H                                                                             | 3.80164100 | 3.26345200  | -3.49727100 | H  | 9.14533400  | 5.85729200  | 0.98037300  |
| H                                                                             | 5.19527700 | 2.97592500  | -2.44136500 | C  | 5.98320300  | -3.04750100 | 1.50906000  |
|                                                                               |            |             |             | H  | 5.88007600  | -3.39301100 | 0.47525900  |
| <b>3-Ts1-a</b>                                                                |            |             |             | H  | 7.05262200  | -3.04037900 | 1.74239400  |
| Zero-point correction= 1.036522 (Hartree/Particle)                            |            |             |             | H  | 5.44175500  | -3.72696300 | 2.16958700  |
| Thermal correction to Energy= 1.097045                                        |            |             |             | C  | 6.08517200  | -2.87940600 | -2.24815200 |
| Thermal correction to Enthalpy= 1.097990                                      |            |             |             | H  | 6.46501200  | -2.71361500 | -3.26410700 |
| Thermal correction to Gibbs Free Energy= 0.934402                             |            |             |             | H  | 6.93912200  | -3.19714600 | -1.63764900 |
| Sum of electronic and zero-point Energies= -2937.527589                       |            |             |             | H  | 5.34836400  | -3.68560100 | -2.28193400 |
| Sum of electronic and thermal Energies= -2937.467066                          |            |             |             | Pd | -0.00760100 | -0.64471600 | -0.38940000 |
| Sum of electronic and thermal Enthalpies= -2937.466122                        |            |             |             | P  | -2.22495400 | -0.11587600 | 0.30266300  |
| Sum of electronic and thermal Free Energies= -2937.629710                     |            |             |             | C  | -2.51689000 | 1.72270200  | -0.06764600 |
| HF( $\omega$ b97xd/6-311+G(d,p)/LanL2dz, SMD[ <i>toluene</i> ])= -2939.200523 |            |             |             | C  | -2.37325800 | -0.48004900 | 2.15883600  |
| N                                                                             | 7.08891100 | -0.79212100 | -0.02216500 | C  | -2.54697700 | -2.00186600 | 2.30641600  |
| C                                                                             | 6.25311700 | -0.49358400 | 1.13272900  | H  | -3.48931500 | -2.36690300 | 1.89250000  |
| H                                                                             | 6.89119600 | -0.22314800 | 1.98108000  | H  | -1.73386100 | -2.53883000 | 1.80456400  |
| H                                                                             | 5.58791500 | 0.35290900  | 0.92665500  | H  | -2.51844200 | -2.26266600 | 3.37171800  |
| C                                                                             | 5.39858100 | -1.66415300 | 1.62615500  | C  | -1.04310300 | -0.11907600 | 2.84713100  |
| C                                                                             | 6.48692200 | -0.51948800 | -1.33476200 | H  | -1.12302800 | -0.35688800 | 3.91615300  |
| H                                                                             | 7.28886800 | -0.50585100 | -2.07665200 | H  | -0.20954500 | -0.69029800 | 2.42637100  |
| H                                                                             | 6.00127900 | 0.46459600  | -1.32120200 | H  | -0.79769700 | 0.94193800  | 2.76114900  |
| C                                                                             | 5.49498900 | -1.60808400 | -1.69007100 | C  | -3.50787900 | 0.26903600  | 2.86341400  |
| C                                                                             | 4.21662700 | -1.43148700 | -1.45407900 | H  | -3.70546100 | -0.19056700 | 3.84022500  |
| C                                                                             | 2.96900200 | -1.23649000 | -1.17072800 | H  | -3.23263700 | 1.31267500  | 3.04571700  |
| C                                                                             | 2.02660400 | -1.38434900 | -0.05251200 | H  | -4.43472500 | 0.26365700  | 2.28749800  |
| C                                                                             | 1.71917200 | -0.70741100 | -1.73759300 | C  | -1.37428300 | 2.50816700  | 0.60390600  |
| H                                                                             | 2.21808000 | -0.74735500 | 0.81164500  | H  | -1.35836200 | 3.52559600  | 0.19242800  |
| H                                                                             | 1.72739600 | -2.40753900 | 0.17962900  | H  | -1.52469600 | 2.59750900  | 1.68443900  |
| H                                                                             | 1.23895000 | -1.32896400 | -2.49535700 | H  | -0.39719400 | 2.04616900  | 0.42113600  |
| H                                                                             | 1.70177900 | 0.36653400  | -1.93394200 | C  | -3.83734200 | 2.38353900  | 0.34203600  |
| S                                                                             | 8.73954900 | -0.63286200 | 0.14097500  | H  | -3.95722900 | 2.43450900  | 1.42549700  |
| O                                                                             | 9.06440300 | -1.13935000 | 1.46560000  | H  | -3.84217000 | 3.41619200  | -0.03273800 |
| O                                                                             | 9.32729500 | -1.19589400 | -1.06301100 | H  | -4.70795600 | 1.87932400  | -0.06703300 |
| C                                                                             | 9.05680800 | 1.11916900  | 0.13798700  | C  | -2.32851600 | 1.83347900  | -1.59230500 |
| C                                                                             | 9.21049500 | 1.78539000  | -1.07593400 | H  | -1.32527300 | 1.50527400  | -1.88525600 |

|   |              |             |             |
|---|--------------|-------------|-------------|
| H | -3.05319100  | 1.22702400  | -2.14201400 |
| H | -2.45701900  | 2.87804500  | -1.90335000 |
| C | -3.49048300  | -1.25030600 | -0.53356300 |
| C | -4.90745200  | -1.27428400 | -0.65805300 |
| C | -2.79172700  | -2.33954400 | -1.09415000 |
| C | -5.50492700  | -2.36183400 | -1.31688200 |
| C | -3.40653000  | -3.41243200 | -1.72460300 |
| H | -1.70591000  | -2.33253600 | -1.02752400 |
| C | -4.78700600  | -3.42663100 | -1.83983100 |
| H | -6.58549200  | -2.34952900 | -1.42394500 |
| H | -2.80133900  | -4.21863300 | -2.12791000 |
| O | 4.32994800   | -1.43446400 | 2.15020600  |
| H | -5.30358000  | -4.24267200 | -2.33643800 |
| C | -5.92159600  | -0.23901300 | -0.24563900 |
| C | -6.59690000  | -0.32171200 | 0.98943700  |
| C | -6.34146100  | 0.71274300  | -1.20165700 |
| C | -7.57220500  | 0.63226100  | 1.28939800  |
| C | -7.33879900  | 1.62418000  | -0.86296900 |
| C | -7.94580500  | 1.62310500  | 0.38949700  |
| H | -8.07295800  | 0.59300800  | 2.25291400  |
| H | -7.64501800  | 2.36445900  | -1.59728600 |
| C | -8.98872000  | 2.66161300  | 0.75805500  |
| H | -9.33210300  | 2.43364400  | 1.77567000  |
| C | -8.37982800  | 4.07050500  | 0.77661500  |
| H | -7.52022500  | 4.11752200  | 1.45310200  |
| H | -8.03547900  | 4.36147000  | -0.22272700 |
| H | -9.11990500  | 4.80894600  | 1.10519200  |
| C | -10.20934900 | 2.59879000  | -0.16931200 |
| H | -10.65276800 | 1.59781900  | -0.16930000 |
| H | -10.97425400 | 3.31512300  | 0.15095400  |
| H | -9.93480500  | 2.84455900  | -1.20173600 |
| C | -5.76493600  | 0.75543500  | -2.61174700 |
| H | -4.81848600  | 0.20667900  | -2.60762900 |
| C | -6.70178800  | 0.03973600  | -3.59735100 |
| H | -7.68679700  | 0.52126800  | -3.60998700 |
| H | -6.29053300  | 0.07781700  | -4.61255800 |
| H | -6.84124700  | -1.01083900 | -3.32766400 |
| C | -5.48148800  | 2.18101300  | -3.10659200 |
| H | -4.94116000  | 2.77064300  | -2.36084500 |
| H | -4.87518300  | 2.14593700  | -4.01832200 |
| H | -6.40684100  | 2.71387500  | -3.35349400 |
| C | -6.37751500  | -1.47612200 | 1.96175600  |
| H | -5.34640100  | -1.81906500 | 1.84773600  |
| C | -6.59564500  | -1.10705300 | 3.43637600  |
| H | -7.66305000  | -1.03018800 | 3.67395000  |
| H | -6.17909000  | -1.89154000 | 4.07722800  |

|   |             |             |            |
|---|-------------|-------------|------------|
| H | -6.12259900 | -0.15967000 | 3.70722200 |
| C | -7.29804600 | -2.65816900 | 1.61227500 |
| H | -7.16864800 | -3.46611300 | 2.34163600 |
| H | -8.34778100 | -2.34284000 | 1.63568800 |
| H | -7.08383700 | -3.06345200 | 0.62124200 |

### 3-Int2-a

Zero-point correction= 1.040011 (Hartree/Particle)

Thermal correction to Energy= 1.099376

Thermal correction to Enthalpy= 1.100320

Thermal correction to Gibbs Free Energy= 0.947979

Sum of electronic and zero-point Energies= -2937.592882

Sum of electronic and thermal Energies= -2937.533517

Sum of electronic and thermal Enthalpies= -2937.532573

Sum of electronic and thermal Free Energies= -2937.684914

HF(ωb97xd/6-311+G(d,p)/LanL2dz, SMD[toluene])= -2939.262838

|   |             |             |             |
|---|-------------|-------------|-------------|
| C | 3.95509900  | -1.31145300 | 0.42721200  |
| H | 4.67505500  | -1.48335800 | 1.23525800  |
| H | 3.20151700  | -0.60826400 | 0.80007900  |
| C | 3.26778400  | -2.66962100 | 0.21775700  |
| C | 3.88125300  | 0.17745500  | -1.59337700 |
| H | 4.60112000  | 0.83911100  | -2.08390900 |
| H | 3.23098900  | 0.78705300  | -0.95453800 |
| C | 3.05666200  | -0.53187400 | -2.65913200 |
| C | 1.74300300  | -0.59108900 | -2.57845300 |
| C | 0.43251600  | -0.62760500 | -2.48469300 |
| C | -0.44855800 | -1.56663300 | -1.71649600 |
| C | -0.55910200 | 0.44559400  | -2.80880300 |
| H | 0.00553900  | -2.09409800 | -0.87734200 |
| H | -1.04646400 | -2.22614500 | -2.35538200 |
| H | -1.20256500 | 0.20867000  | -3.66292700 |
| H | -0.18988200 | 1.47148000  | -2.84751500 |
| S | 6.32463100  | -0.57463600 | -0.62843100 |
| O | 6.80791200  | -1.75545200 | 0.09775400  |
| O | 6.78839600  | -0.24860100 | -1.97903100 |
| C | 6.65601100  | 0.85497100  | 0.40972600  |
| C | 6.72665600  | 2.12662900  | -0.16634200 |
| C | 6.82429100  | 0.68793900  | 1.78679000  |
| C | 6.94680000  | 3.23382700  | 0.65034800  |
| H | 6.64277700  | 2.23912100  | -1.24189400 |
| C | 7.04390300  | 1.80728900  | 2.58809700  |
| H | 6.81730700  | -0.30840100 | 2.21550600  |
| C | 7.10012700  | 3.09556300  | 2.03778900  |
| H | 7.01289600  | 4.22167700  | 0.20075000  |
| H | 7.18585900  | 1.67591700  | 3.65806000  |
| C | 7.31085000  | 4.30547600  | 2.91689500  |

|    |             |             |             |   |             |             |             |
|----|-------------|-------------|-------------|---|-------------|-------------|-------------|
| H  | 7.85921300  | 5.09339000  | 2.39001100  | H | -4.50711300 | -0.96914700 | 3.14369300  |
| H  | 6.35041800  | 4.73362800  | 3.23390200  | H | -6.10139700 | 3.01532500  | 3.22694200  |
| H  | 7.86851400  | 4.05017500  | 3.82379400  | O | 2.32123500  | -2.95358200 | 0.93239200  |
| C  | 3.85198600  | -3.61934800 | -0.79684100 | H | -5.94534400 | 0.72205100  | 4.21904400  |
| H  | 3.61048000  | -3.26320600 | -1.80445600 | C | -3.02754400 | -0.89014200 | 1.04394500  |
| H  | 4.94425900  | -3.64238200 | -0.71782400 | C | -3.69741800 | -1.84035600 | 0.21347900  |
| H  | 3.42910500  | -4.61570500 | -0.65264000 | C | -1.83151900 | -1.30128900 | 1.71286700  |
| C  | 3.84764200  | -1.10372400 | -3.82155500 | C | -3.17107100 | -3.13149300 | 0.08427900  |
| H  | 4.33977600  | -0.30279300 | -4.39113600 | C | -1.35447400 | -2.60491800 | 1.53860600  |
| H  | 4.64856600  | -1.76591300 | -3.46989900 | C | -2.02080600 | -3.54938600 | 0.75176700  |
| H  | 3.19863400  | -1.66156800 | -4.50173000 | H | -3.70644200 | -3.85360600 | -0.52719000 |
| Pd | -1.71684600 | -0.00605900 | -1.11711600 | H | -0.44415700 | -2.89705400 | 2.05301400  |
| P  | -2.91212100 | 2.04636200  | -0.51844000 | C | -1.55103000 | -4.99492400 | 0.64443500  |
| C  | -4.19583200 | 2.75509500  | -1.79110500 | H | -2.33709800 | -5.54191800 | 0.10511600  |
| C  | -1.71079500 | 3.47095300  | 0.01456600  | C | -0.25000600 | -5.13192000 | -0.17026600 |
| C  | -0.58120800 | 2.79962100  | 0.81881800  | H | -0.37222500 | -4.72245400 | -1.17870600 |
| H  | -0.95192100 | 2.35935700  | 1.74850300  | H | 0.58059100  | -4.60209100 | 0.30810100  |
| H  | -0.08895700 | 2.01382500  | 0.23897300  | H | 0.02633900  | -6.18989800 | -0.26297100 |
| H  | 0.16955100  | 3.55510100  | 1.08788100  | C | -1.40291800 | -5.65433200 | 2.02908500  |
| C  | -1.07634200 | 4.09655500  | -1.24569500 | H | -2.33019200 | -5.58110100 | 2.60876900  |
| H  | -0.26086200 | 4.76337000  | -0.93568300 | H | -1.15187400 | -6.71601800 | 1.91981900  |
| H  | -0.64818700 | 3.33704600  | -1.90597300 | H | -0.60199700 | -5.18547400 | 2.61214400  |
| H  | -1.78223700 | 4.69894900  | -1.82353200 | C | -1.10320200 | -0.40269200 | 2.71196500  |
| C  | -2.30698400 | 4.58847500  | 0.89246900  | H | -1.55662200 | 0.59165000  | 2.66100900  |
| H  | -1.51815900 | 5.32263100  | 1.10597500  | C | -1.28976500 | -0.90927000 | 4.15779600  |
| H  | -3.12718700 | 5.12724000  | 0.41215100  | H | -0.85981100 | -1.90934600 | 4.28484500  |
| H  | -2.66053000 | 4.20484300  | 1.85339800  | H | -0.78899700 | -0.23660200 | 4.86479200  |
| C  | -3.54724900 | 2.64768500  | -3.19035200 | H | -2.34842900 | -0.96069600 | 4.43362100  |
| H  | -4.28151900 | 2.94954200  | -3.94937300 | C | 0.39512200  | -0.25639100 | 2.38506700  |
| H  | -2.67356100 | 3.29441600  | -3.30362900 | H | 0.53788900  | 0.10988800  | 1.36425800  |
| H  | -3.23502700 | 1.62185000  | -3.40395700 | H | 0.86358700  | 0.45327800  | 3.07872200  |
| C  | -4.67374000 | 4.20472600  | -1.57606400 | H | 0.92991300  | -1.20805400 | 2.46404500  |
| H  | -3.86191500 | 4.93373000  | -1.62821800 | C | -5.05709500 | -1.55982600 | -0.42282200 |
| H  | -5.38511600 | 4.45907600  | -2.37352000 | H | -5.26497600 | -0.49373400 | -0.31294100 |
| H  | -5.20051700 | 4.34071300  | -0.62709700 | C | -5.08347800 | -1.88983700 | -1.92715200 |
| C  | -5.43445300 | 1.83914200  | -1.78631100 | H | -4.97212000 | -2.96475900 | -2.10945800 |
| H  | -5.16915900 | 0.80631400  | -2.02155100 | H | -6.04008300 | -1.58261500 | -2.36708000 |
| H  | -5.96358900 | 1.85545800  | -0.82874900 | H | -4.27317800 | -1.37748300 | -2.45717500 |
| H  | -6.13313200 | 2.18290300  | -2.56062300 | C | -6.18078400 | -2.31554400 | 0.31737900  |
| C  | -3.88076100 | 1.61539000  | 1.01437300  | H | -7.15586400 | -2.08018400 | -0.12639800 |
| C  | -3.80635800 | 0.30834600  | 1.56529700  | H | -6.03677700 | -3.40057100 | 0.25653200  |
| C  | -4.72238600 | 2.55803200  | 1.63873500  | H | -6.21665400 | -2.04001100 | 1.37673300  |
| C  | -4.56246500 | 0.03059700  | 2.72272600  |   |             |             |             |
| C  | -5.46434300 | 2.25816300  | 2.77791200  |   |             |             |             |
| H  | -4.80091100 | 3.55518500  | 1.22493500  |   |             |             |             |
| C  | -5.37798700 | 0.98130400  | 3.32921500  |   |             |             |             |

**3-Ts2-a**

Zero-point correction= 1.038940 (Hartree/Particle)

Thermal correction to Energy= 1.098007

|                                                             |             |             |             |   |             |             |             |
|-------------------------------------------------------------|-------------|-------------|-------------|---|-------------|-------------|-------------|
| Thermal correction to Enthalpy= 1.098951                    |             |             |             | P | -2.71334800 | -1.89332500 | 0.30912000  |
| Thermal correction to Gibbs Free Energy= 0.945520           |             |             |             | C | -3.09313700 | -3.08378400 | 1.80678500  |
| Sum of electronic and zero-point Energies= -2937.542371     |             |             |             | C | -2.20712000 | -2.93084100 | -1.24966400 |
| Sum of electronic and thermal Energies= -2937.483303        |             |             |             | C | -1.49847000 | -1.95645800 | -2.21601900 |
| Sum of electronic and thermal Enthalpies= -2937.482359      |             |             |             | H | -2.11365200 | -1.08978900 | -2.46360800 |
| Sum of electronic and thermal Free Energies= -2937.635790   |             |             |             | H | -0.55965600 | -1.58270000 | -1.80355100 |
| HF(ωb97xd/6-311+G(d,p)/Lanl2dz, SMD[toluene])= -2939.214588 |             |             |             | H | -1.27265800 | -2.48802200 | -3.14979300 |
| N                                                           | 4.40476200  | -0.08797000 | -1.27863500 | C | -1.18613400 | -4.02761900 | -0.87898200 |
| C                                                           | 3.94544400  | -1.45325100 | -1.00724800 | H | -0.80367000 | -4.46786600 | -1.80808200 |
| H                                                           | 4.80205500  | -2.13754100 | -1.02036200 | H | -0.32077600 | -3.62937500 | -0.34621900 |
| H                                                           | 3.48219200  | -1.51410400 | -0.01709500 | H | -1.62237100 | -4.83826900 | -0.28982700 |
| C                                                           | 2.95949300  | -2.02571000 | -2.03581800 | C | -3.39672300 | -3.58130800 | -1.98198500 |
| C                                                           | 3.69440000  | 0.99052000  | -0.53358100 | H | -3.01381400 | -4.12401800 | -2.85596000 |
| H                                                           | 4.25160000  | 1.91259000  | -0.72175000 | H | -3.93225500 | -4.30681700 | -1.36185500 |
| H                                                           | 3.72602200  | 0.76942100  | 0.54224400  | H | -4.11570500 | -2.84109600 | -2.34382600 |
| C                                                           | 2.24989400  | 1.14373100  | -1.00230800 | C | -1.74818500 | -3.44660200 | 2.47340000  |
| C                                                           | 1.20814700  | 0.73366500  | -0.27520900 | H | -1.94713000 | -4.07898200 | 3.34865700  |
| C                                                           | 1.07323200  | 0.12580100  | 1.00584200  | H | -1.07716200 | -4.00012200 | 1.81250200  |
| C                                                           | 0.88833300  | 0.77808300  | 2.23874200  | H | -1.22904100 | -2.54859800 | 2.81617200  |
| C                                                           | 0.61050500  | -1.26287400 | 0.99214500  | C | -3.84569900 | -4.39363100 | 1.48680100  |
| S                                                           | 6.04918300  | 0.12071300  | -1.59395500 | H | -3.33819000 | -5.01210700 | 0.74385200  |
| O                                                           | 6.45041800  | -1.02585400 | -2.42099900 | H | -3.91104600 | -4.98680500 | 2.40860400  |
| O                                                           | 6.21361000  | 1.50009400  | -2.05830500 | H | -4.87173300 | -4.22402800 | 1.15311500  |
| C                                                           | 6.92544800  | -0.02861500 | -0.03112000 | C | -3.91467400 | -2.29453100 | 2.84634100  |
| C                                                           | 7.03712900  | 1.08399000  | 0.80857700  | H | -3.39046400 | -1.38948200 | 3.16459000  |
| C                                                           | 7.46020300  | -1.26179900 | 0.34854400  | H | -4.90434900 | -2.01351600 | 2.47555900  |
| C                                                           | 7.67604300  | 0.94834500  | 2.03874200  | H | -4.05667200 | -2.92328400 | 3.73524700  |
| H                                                           | 6.64677500  | 2.04460800  | 0.49023500  | C | -4.37146100 | -1.10304700 | -0.07316400 |
| C                                                           | 8.09808500  | -1.37845500 | 1.58317900  | C | -4.53573000 | 0.30565400  | -0.14309300 |
| H                                                           | 7.39728000  | -2.10765600 | -0.32749200 | C | -5.52279500 | -1.90487100 | -0.20145700 |
| C                                                           | 8.21461000  | -0.28127800 | 2.44717100  | C | -5.83756800 | 0.82991800  | -0.24959000 |
| H                                                           | 7.76409700  | 1.81396700  | 2.69104500  | C | -6.80107500 | -1.36695600 | -0.33139300 |
| H                                                           | 8.51806400  | -2.33745700 | 1.87692000  | C | -6.96368100 | 0.01666200  | -0.33147600 |
| C                                                           | 8.93229000  | -0.40672400 | 3.77035400  | H | -5.95465300 | 1.90880800  | -0.28625100 |
| H                                                           | 8.45023200  | 0.19777900  | 4.54635000  | H | -7.65900000 | -2.02741700 | -0.42265100 |
| H                                                           | 8.95900700  | -1.44526100 | 4.11537400  | O | 2.08172300  | -2.78735400 | -1.66411700 |
| H                                                           | 9.97145000  | -0.06108200 | 3.68916800  | H | 0.66025700  | 0.20412700  | 3.13024600  |
| C                                                           | 3.18523100  | -1.69305900 | -3.49099400 | H | 1.04163300  | 1.84538800  | 2.34702200  |
| H                                                           | 2.84231100  | -0.67131600 | -3.68755500 | H | 0.83926100  | -1.87296900 | 0.12336900  |
| H                                                           | 4.25186300  | -1.72044500 | -3.73690700 | H | 0.62834900  | -1.79857100 | 1.93999800  |
| H                                                           | 2.61885100  | -2.38832600 | -4.11469000 | C | -3.42028700 | 1.31853500  | -0.14577100 |
| C                                                           | 2.10188000  | 1.84145000  | -2.34159700 | C | -2.89109900 | 1.78700100  | 1.10244600  |
| H                                                           | 2.36594300  | 2.90735300  | -2.26040600 | C | -3.04829300 | 1.97502800  | -1.35195000 |
| H                                                           | 2.77363000  | 1.42329400  | -3.10310000 | C | -1.92486900 | 2.81149900  | 1.09316100  |
| H                                                           | 1.07090800  | 1.77199600  | -2.69889800 | C | -2.08510400 | 2.99004500  | -1.27628100 |
| Pd                                                          | -1.17039100 | -0.19647600 | 0.76503400  | C | -1.50133000 | 3.42411900  | -0.08662700 |

|                                                             |             |             |             |    |              |             |             |
|-------------------------------------------------------------|-------------|-------------|-------------|----|--------------|-------------|-------------|
| H                                                           | -1.54206900 | 3.16593200  | 2.04436300  | C  | -5.11744800  | -0.71744000 | 1.05438700  |
| H                                                           | -1.78288300 | 3.47684300  | -2.20190400 | H  | -6.02945900  | -1.04415000 | 1.56713200  |
| C                                                           | -3.64921500 | 1.81342900  | -2.76744900 | H  | -4.95336700  | -1.37934100 | 0.19799500  |
| H                                                           | -2.78788700 | 1.91695000  | -3.44122100 | C  | -3.97738500  | -0.94311900 | 2.06041300  |
| C                                                           | -4.58554100 | 3.00891300  | -3.06766900 | C  | -4.63916000  | 1.00519000  | -0.69537700 |
| H                                                           | -4.09095700 | 3.96895600  | -2.89064000 | H  | -4.99644500  | 1.99675100  | -0.98459000 |
| H                                                           | -4.91366000 | 2.98174700  | -4.11391700 | H  | -4.95936000  | 0.27869200  | -1.44894200 |
| H                                                           | -5.48132700 | 2.97151700  | -2.43660100 | C  | -3.12723700  | 1.01472400  | -0.54247500 |
| C                                                           | -4.35914400 | 0.51719500  | -3.19325200 | C  | -2.37029100  | -0.01889300 | -0.95449100 |
| H                                                           | -3.79382100 | -0.37986700 | -2.94082000 | C  | -2.67845300  | -1.28346600 | -1.62706600 |
| H                                                           | -5.35601900 | 0.41914000  | -2.75836400 | C  | -3.42161200  | -1.57065700 | -2.71251000 |
| H                                                           | -4.47775300 | 0.53439700  | -4.28351300 | C  | -1.64183900  | -2.15476800 | -0.98291800 |
| H                                                           | -5.42424200 | -2.98113500 | -0.20428400 | S  | -6.71851000  | 1.45890600  | 1.00510800  |
| H                                                           | -7.95245900 | 0.46007700  | -0.41147800 | O  | -7.04257600  | 1.03636200  | 2.37383300  |
| C                                                           | -0.53940100 | 4.60606700  | -0.09517500 | O  | -6.52723600  | 2.86928600  | 0.65704100  |
| H                                                           | -0.19746300 | 4.72841600  | -1.13171900 | C  | -8.00596400  | 0.80803800  | -0.06664400 |
| C                                                           | -1.27789000 | 5.90158500  | 0.30245500  | C  | -8.19502200  | 1.36229600  | -1.33602700 |
| H                                                           | -1.64468500 | 5.84205700  | 1.33475000  | C  | -8.79291000  | -0.26187700 | 0.36677500  |
| H                                                           | -0.60686000 | 6.76638100  | 0.23412200  | C  | -9.16745500  | 0.82484800  | -2.17650200 |
| H                                                           | -2.14023800 | 6.08602300  | -0.34823100 | H  | -7.60784600  | 2.22015700  | -1.64575600 |
| C                                                           | 0.70898300  | 4.39514300  | 0.77565900  | C  | -9.76164600  | -0.78611600 | -0.48778800 |
| H                                                           | 0.45188400  | 4.32014300  | 1.83962600  | H  | -8.66638800  | -0.65304800 | 1.37045500  |
| H                                                           | 1.23741200  | 3.48261800  | 0.48450900  | C  | -9.95928900  | -0.26027100 | -1.77214200 |
| H                                                           | 1.39205200  | 5.24607400  | 0.66631900  | H  | -9.32119700  | 1.26191400  | -3.16020300 |
| C                                                           | -3.59006700 | 1.45928000  | 2.43085400  | H  | -10.38107900 | -1.61210400 | -0.14681700 |
| H                                                           | -4.12593700 | 0.51532000  | 2.30662300  | C  | -10.98976500 | -0.85413300 | -2.70298000 |
| C                                                           | -2.65437200 | 1.30647500  | 3.64114400  | H  | -11.42438700 | -0.09233800 | -3.35874000 |
| H                                                           | -2.16311200 | 2.25073000  | 3.90309900  | H  | -10.54070800 | -1.62099100 | -3.34825900 |
| H                                                           | -3.23374100 | 0.99163500  | 4.51765500  | H  | -11.80407300 | -1.33125400 | -2.14812300 |
| H                                                           | -1.87154300 | 0.56645200  | 3.45111200  | C  | -3.74449100  | 0.11874600  | 3.11124200  |
| C                                                           | -4.64800800 | 2.54576200  | 2.73062100  | H  | -3.21126500  | 0.96450800  | 2.66318800  |
| H                                                           | -5.19182700 | 2.30476200  | 3.65211900  | H  | -4.69370200  | 0.50967500  | 3.49199600  |
| H                                                           | -4.17265100 | 3.52476500  | 2.86431400  | H  | -3.14011500  | -0.29981400 | 3.91939500  |
| H                                                           | -5.37972400 | 2.63596300  | 1.92185000  | C  | -2.57088600  | 2.24272700  | 0.14029000  |
|                                                             |             |             |             | H  | -2.58561100  | 3.10777900  | -0.53929000 |
| <b>3-Int3-a</b>                                             |             |             |             | H  | -3.17456000  | 2.52719300  | 1.01167300  |
| Zero-point correction= 1.040461 (Hartree/Particle)          |             |             |             | H  | -1.53486500  | 2.09123800  | 0.46155800  |
| Thermal correction to Energy= 1.100040                      |             |             |             | Pd | -0.42939600  | -0.52390200 | -0.53322700 |
| Thermal correction to Enthalpy= 1.100985                    |             |             |             | P  | 1.86044500   | -1.25603700 | 0.08088500  |
| Thermal correction to Gibbs Free Energy= 0.944751           |             |             |             | C  | 2.85095900   | -1.76750700 | -1.49175800 |
| Sum of electronic and zero-point Energies= -2937.584042     |             |             |             | C  | 1.89324900   | -2.67732100 | 1.41162100  |
| Sum of electronic and thermal Energies= -2937.524463        |             |             |             | C  | 0.77042600   | -2.41898700 | 2.44220300  |
| Sum of electronic and thermal Enthalpies= -2937.523519      |             |             |             | H  | 0.97959800   | -1.54973800 | 3.07052100  |
| Sum of electronic and thermal Free Energies= -2937.679753   |             |             |             | H  | -0.20889000  | -2.28239300 | 1.97326000  |
| HF(ob97xd/6-311+G(d,p)/Lanl2dz, SMD[toluene])= -2939.255200 |             |             |             | H  | 0.70667800   | -3.28930100 | 3.10828100  |
| N                                                           | -5.28075800 | 0.67259900  | 0.60727900  | C  | 1.58739400   | -4.03228400 | 0.74153500  |

|   |             |              |             |                                                                  |              |                    |             |
|---|-------------|--------------|-------------|------------------------------------------------------------------|--------------|--------------------|-------------|
| H | 1.45441900  | -4.78515300  | 1.52891600  | C                                                                | 2.51066600   | 2.84656400         | -1.00533600 |
| H | 0.66312300  | -4.00496100  | 0.15617300  | H                                                                | 2.09312400   | 1.90897500         | -1.37772300 |
| H | 2.40212900  | -4.37928100  | 0.10102400  | H                                                                | 2.25005400   | 2.94272300         | 0.05080800  |
| C | 3.22402400  | -2.77584000  | 2.17241300  | H                                                                | 2.00975900   | 3.66296200         | -1.54006900 |
| H | 3.16693000  | -3.60167400  | 2.89473700  | H                                                                | 0.46602800   | 0.18648300         | 1.79747100  |
| H | 4.07340600  | -2.97191100  | 1.51449700  | H                                                                | 2.88194000   | 3.15002900         | 3.71102300  |
| H | 3.42607100  | -1.86160500  | 2.73721400  | C                                                                | 8.42459100   | 0.89209100         | -2.35566800 |
| C | 1.97827900  | -2.77802300  | -2.27882700 | H                                                                | 8.21639600   | 1.58771200         | -3.18012200 |
| H | 2.46344200  | -2.95751800  | -3.24709100 | C                                                                | 9.70857800   | 1.37774000         | -1.65627100 |
| H | 1.87146700  | -3.74460800  | -1.78686400 | H                                                                | 9.98758900   | 0.71479400         | -0.82858100 |
| H | 0.98034200  | -2.37495200  | -2.47354400 | H                                                                | 10.54773500  | 1.39862400         | -2.36179100 |
| C | 4.24553200  | -2.37109000  | -1.26466800 | H                                                                | 9.58051300   | 2.38623200         | -1.24796800 |
| H | 4.20301900  | -3.30662200  | -0.69840300 | C                                                                | 8.62544100   | -0.50611200        | -2.97085300 |
| H | 4.69857600  | -2.60343200  | -2.23816400 | H                                                                | 8.85325700   | -1.25093500        | -2.19893300 |
| H | 4.91408600  | -1.67952100  | -0.74983000 | H                                                                | 7.72592500   | -0.83873500        | -3.50047200 |
| C | 2.95478700  | -0.52374000  | -2.39577300 | H                                                                | 9.45877800   | -0.49902700        | -3.68357300 |
| H | 1.96721100  | -0.08781000  | -2.58578800 | C                                                                | 6.13912100   | -0.58887900        | 1.91092000  |
| H | 3.61036900  | 0.23934400   | -1.98179900 | H                                                                | 5.12303600   | -0.72358400        | 2.28795200  |
| H | 3.37343300  | -0.82797800  | -3.36425700 | C                                                                | 6.78549600   | -1.98248400        | 1.79856900  |
| C | 2.49848800  | 0.24970500   | 1.06454700  | H                                                                | 7.85979800   | -1.91852800        | 1.59056800  |
| C | 3.70898100  | 1.00334300   | 1.14878300  | H                                                                | 6.67424800   | -2.52274000        | 2.74577600  |
| C | 1.43235000  | 0.67356800   | 1.89679100  | H                                                                | 6.32937400   | -2.58637500        | 1.00800700  |
| C | 3.80066300  | 2.01530800   | 2.12712900  | C                                                                | 6.90502200   | 0.25098100         | 2.95678500  |
| C | 1.54238000  | 1.69275900   | 2.83938900  | H                                                                | 6.95405600   | -0.28087000        | 3.91486700  |
| C | 2.75575100  | 2.35704700   | 2.97910700  | H                                                                | 7.93187400   | 0.44461400         | 2.62427400  |
| H | 4.73194400  | 2.57051000   | 2.18628700  | H                                                                | 6.42189300   | 1.21703100         | 3.13230200  |
| H | 0.68244900  | 1.95881800   | 3.44757600  |                                                                  |              |                    |             |
| O | -3.35049200 | -1.98718600  | 2.03085700  | <b>3-Ts3-a</b>                                                   |              |                    |             |
| H | -3.38305800 | -2.55660600  | -3.17048200 | Zero-point correction=                                           | 1.041620     | (Hartree/Particle) |             |
| H | -4.03318000 | -0.82241200  | -3.20856600 | Thermal correction to Energy=                                    | 1.099182     |                    |             |
| H | -1.92192000 | -2.53674200  | 0.00160900  | Thermal correction to Enthalpy=                                  | 1.100126     |                    |             |
| H | -1.13805400 | -2.89687000  | -1.60627000 | Thermal correction to Gibbs Free Energy=                         | 0.954979     |                    |             |
| C | 4.91452500  | 0.95068500   | 0.24041500  | Sum of electronic and zero-point Energies=                       | -2937.553940 |                    |             |
| C | 6.05059600  | 0.16845700   | 0.58474700  | Sum of electronic and thermal Energies=                          | -2937.496378 |                    |             |
| C | 4.99070900  | 1.82338800   | -0.87680800 | Sum of electronic and thermal Enthalpies=                        | -2937.495434 |                    |             |
| C | 7.16762800  | 0.16614100   | -0.25667400 | Sum of electronic and thermal Free Energies=                     | -2937.640581 |                    |             |
| C | 6.13194400  | 1.75618200   | -1.69491000 | HF( $\omega$ b97xd/6-311+G(d,p)/Lanl2dz, SMD[ <i>toluene</i> ])= | -2939.220274 |                    |             |
| C | 7.21978800  | 0.92977500   | -1.42521000 | N                                                                | 4.28578600   | -1.61552900        | -0.33287600 |
| H | 8.02415200  | -0.444464500 | 0.01357500  | C                                                                | 3.21199800   | -1.01180600        | 0.46106800  |
| H | 6.17354700  | 2.39982600   | -2.57217800 | H                                                                | 3.47002800   | -1.13167600        | 1.51878600  |
| C | 4.02360400  | 2.96568900   | -1.26047600 | H                                                                | 3.09676400   | 0.05924700         | 0.25464300  |
| H | 4.13317400  | 3.06384700   | -2.34898600 | C                                                                | 1.85575100   | -1.71199100        | 0.28189200  |
| C | 4.54012200  | 4.29123000   | -0.65222000 | C                                                                | 4.40941600   | -1.23543500        | -1.74571800 |
| H | 5.59317100  | 4.46343300   | -0.89827900 | H                                                                | 5.07125100   | -1.96655800        | -2.21981000 |
| H | 3.95575200  | 5.13708900   | -1.03418700 | H                                                                | 4.90785100   | -0.25037600        | -1.84116400 |
| H | 4.44365700  | 4.28498800   | 0.43905000  | C                                                                | 3.09756900   | -1.16047400        | -2.50891700 |



|    |             |             |             |   |             |             |             |
|----|-------------|-------------|-------------|---|-------------|-------------|-------------|
| C  | 1.89048700  | -1.22156100 | -1.95932000 | H | -1.26136000 | -4.05399100 | 2.38804200  |
| C  | 0.59087300  | -0.94095300 | -2.30787800 | H | -1.68834300 | -4.17044000 | 0.68058700  |
| C  | 0.00389800  | 0.38936400  | -2.22129500 | H | -0.73347600 | -2.78750500 | 1.26027200  |
| C  | -0.56040800 | -1.84275300 | -2.22137200 | C | -3.93143300 | -3.66036600 | 2.31044500  |
| S  | 5.72189900  | -2.00496000 | 0.45348400  | H | -4.17605400 | -4.42004100 | 1.56515700  |
| O  | 5.35240800  | -2.49810400 | 1.78396700  | H | -3.55373500 | -4.19222300 | 3.19377800  |
| O  | 6.50199200  | -2.82107900 | -0.48141900 | H | -4.85542100 | -3.15938600 | 2.61497100  |
| C  | 6.62407100  | -0.46701200 | 0.69054600  | C | -2.49736700 | -1.75822000 | 3.02790600  |
| C  | 7.50478200  | -0.02096100 | -0.29824600 | H | -1.64020500 | -1.12484600 | 2.79916300  |
| C  | 6.41909300  | 0.28499900  | 1.85072300  | H | -3.34098000 | -1.13240900 | 3.33526600  |
| C  | 8.17076200  | 1.19163900  | -0.12369300 | H | -2.21751600 | -2.38384600 | 3.88568400  |
| H  | 7.68605200  | -0.63428000 | -1.17435400 | C | -4.32887600 | -0.17620500 | 0.90221500  |
| C  | 7.09369400  | 1.49394100  | 2.00880800  | C | -3.98869700 | 1.20407800  | 0.76347800  |
| H  | 5.76355600  | -0.09141400 | 2.62863800  | C | -5.51967700 | -0.49906500 | 1.58415500  |
| C  | 7.97236000  | 1.97060200  | 1.02471200  | C | -4.87063000 | 2.15479800  | 1.31610200  |
| H  | 8.86463600  | 1.53304700  | -0.88824200 | C | -6.37919900 | 0.46354400  | 2.10696800  |
| H  | 6.94382100  | 2.07259300  | 2.91732600  | H | -5.78296100 | -1.53955900 | 1.71792100  |
| C  | 8.67707700  | 3.29602100  | 1.19392100  | C | -6.05032700 | 1.80852200  | 1.96884000  |
| H  | 9.62313900  | 3.32054700  | 0.64329800  | H | -4.60186700 | 3.20294700  | 1.23883700  |
| H  | 8.05898500  | 4.12236900  | 0.81773600  | H | -7.28626600 | 0.16052000  | 2.62264600  |
| H  | 8.89093200  | 3.50491900  | 2.24751300  | O | 0.85306500  | -1.15604400 | 0.77458600  |
| C  | 1.89964100  | -3.22960100 | 0.13885400  | H | -0.73164300 | 0.64521100  | -2.98811600 |
| H  | 0.93290900  | -3.60409900 | -0.20304300 | H | 0.62533100  | 1.21649500  | -1.88913800 |
| H  | 2.68932300  | -3.57085100 | -0.52939000 | H | -1.28650400 | -1.76136000 | -3.03212900 |
| H  | 2.09130700  | -3.65370600 | 1.13607000  | H | -0.40025500 | -2.85994100 | -1.87069000 |
| C  | 3.33336300  | -0.97330200 | -4.00017500 | H | -6.69346000 | 2.58410400  | 2.37581900  |
| H  | 4.01633500  | -0.13297000 | -4.19485100 | C | -2.73331800 | 1.82280100  | 0.15817000  |
| H  | 3.79958300  | -1.86388700 | -4.44616000 | C | -1.59504500 | 2.01082600  | 1.01061900  |
| H  | 2.39411100  | -0.78111500 | -4.52508600 | C | -2.77395700 | 2.56260200  | -1.07163500 |
| Pd | -1.38329300 | -0.44964700 | -0.83055400 | C | -0.51215200 | 2.78998800  | 0.57680400  |
| P  | -3.24318100 | -1.57641800 | 0.28519700  | C | -1.65613400 | 3.32705400  | -1.43320700 |
| C  | -2.83878700 | -2.67847700 | 1.84326900  | C | -0.51493700 | 3.46017700  | -0.64174200 |
| C  | -4.33354900 | -2.65221300 | -0.92047200 | H | 0.33363900  | 2.90551800  | 1.24552500  |
| C  | -4.49840800 | -1.86912100 | -2.23495200 | H | -1.69521600 | 3.87325900  | -2.37407900 |
| H  | -5.16384300 | -1.01545000 | -2.10341900 | C | 0.61674400  | 4.38697600  | -1.06958800 |
| H  | -3.54305300 | -1.50904200 | -2.62559400 | H | 0.51229000  | 4.54260200  | -2.15229100 |
| H  | -4.95172300 | -2.52714300 | -2.98841200 | C | 2.01982400  | 3.80892300  | -0.81796100 |
| C  | -3.55573400 | -3.94732600 | -1.24225800 | H | 2.21851600  | 3.67772200  | 0.25198500  |
| H  | -4.07192200 | -4.47171200 | -2.05699300 | H | 2.15057000  | 2.83640900  | -1.30414600 |
| H  | -2.53579800 | -3.73957100 | -1.57706700 | H | 2.78401000  | 4.48972200  | -1.21083900 |
| H  | -3.50571200 | -4.63647700 | -0.39651400 | C | 0.46646300  | 5.76486400  | -0.39038800 |
| C  | -5.75712200 | -3.01903800 | -0.45180200 | H | 1.24144200  | 6.45723000  | -0.74082700 |
| H  | -6.22127300 | -3.64724000 | -1.22415400 | H | -0.51156800 | 6.20942000  | -0.60530400 |
| H  | -5.78284500 | -3.58470500 | 0.48064100  | H | 0.56113800  | 5.67502800  | 0.69857800  |
| H  | -6.38699200 | -2.13244900 | -0.33933200 | C | -3.96747300 | 2.76317200  | -2.02584300 |
| C  | -1.55391100 | -3.46706300 | 1.50644600  | H | -3.50496200 | 3.05897400  | -2.97641000 |

|                                                             |             |             |             |    |             |             |             |
|-------------------------------------------------------------|-------------|-------------|-------------|----|-------------|-------------|-------------|
| C                                                           | -4.84508300 | 3.96507900  | -1.60554700 | C  | -7.13239800 | -0.78925700 | 0.37588700  |
| H                                                           | -4.23438400 | 4.84114000  | -1.36131400 | C  | -5.76785200 | 1.14303800  | 0.89066400  |
| H                                                           | -5.51556700 | 4.23825800  | -2.42953200 | C  | -7.69742600 | -0.71630600 | 1.64530400  |
| H                                                           | -5.46919800 | 3.72846600  | -0.73924900 | H  | -7.45054400 | -1.54349500 | -0.33618200 |
| C                                                           | -4.83343100 | 1.54889400  | -2.35750200 | C  | -6.34057400 | 1.20081800  | 2.15402400  |
| H                                                           | -4.21737700 | 0.74262500  | -2.75800200 | H  | -5.03319700 | 1.87786900  | 0.57792300  |
| H                                                           | -5.38097600 | 1.17305400  | -1.48951200 | C  | -7.30723900 | 0.27094700  | 2.55236000  |
| H                                                           | -5.57027700 | 1.82311800  | -3.12271400 | H  | -8.45907400 | -1.43652000 | 1.93224600  |
| C                                                           | -1.59678800 | 1.60379500  | 2.48528400  | H  | -6.03727800 | 1.98518800  | 2.84277900  |
| C                                                           | -0.24583700 | 1.06435900  | 2.99255800  | C  | -7.89896100 | 0.33076800  | 3.93766500  |
| H                                                           | -0.37690000 | 0.63328700  | 3.99255900  | H  | -8.83789000 | -0.22736100 | 3.99655700  |
| H                                                           | 0.17479000  | 0.30294800  | 2.32915500  | H  | -7.20881800 | -0.10034500 | 4.67273300  |
| H                                                           | 0.49308500  | 1.86879600  | 3.09492900  | H  | -8.09703700 | 1.36383700  | 4.24095300  |
| C                                                           | -2.03267200 | 2.80587600  | 3.35514900  | C  | -1.22617900 | -0.72754900 | -2.23358800 |
| H                                                           | -1.32796000 | 3.63923500  | 3.24898500  | H  | -0.31032200 | -1.26639200 | -2.49294000 |
| H                                                           | -3.02898500 | 3.16972300  | 3.08595200  | H  | -2.02530200 | -1.05120500 | -2.90700900 |
| H                                                           | -2.05424500 | 2.51547300  | 4.41259500  | H  | -1.03540000 | 0.34093200  | -2.38505900 |
| H                                                           | -2.34746500 | 0.82643900  | 2.62315700  | C  | -3.23115400 | -4.51505600 | -0.39087900 |
| <b>3-Int4</b>                                               |             |             |             | H  | -3.78298500 | -4.68609100 | 0.54332100  |
| Zero-point correction= 1.044749 (Hartree/Particle)          |             |             |             | H  | -3.85618500 | -4.90728800 | -1.20339000 |
| Thermal correction to Energy= 1.102242                      |             |             |             | H  | -2.31143300 | -5.10107900 | -0.34750700 |
| Thermal correction to Enthalpy= 1.103186                    |             |             |             | Pd | 1.26634900  | -0.81220500 | 0.09702800  |
| Thermal correction to Gibbs Free Energy= 0.955080           |             |             |             | P  | 3.58557700  | -1.15551400 | 0.12576100  |
| Sum of electronic and zero-point Energies= -2937.608786     |             |             |             | C  | 4.23227100  | -1.74943600 | -1.57469500 |
| Sum of electronic and thermal Energies= -2937.551293        |             |             |             | C  | 4.37403000  | -2.29972900 | 1.47184200  |
| Sum of electronic and thermal Enthalpies= -2937.550349      |             |             |             | C  | 4.45946700  | -1.58024500 | 2.82746700  |
| Sum of electronic and thermal Free Energies= -2937.698454   |             |             |             | H  | 5.03804100  | -0.65395400 | 2.78521400  |
| HF(ωb97xd/6-311+G(d,p)/LanL2dz, SMD[toluene])= -2939.281386 |             |             |             | H  | 3.47181300  | -1.35951900 | 3.22845100  |
| N                                                           | -3.98794000 | -0.88446800 | -1.28373800 | H  | 4.95630100  | -2.25071000 | 3.53940200  |
| C                                                           | -2.94423500 | -0.25213200 | -0.48105200 | C  | 3.42766100  | -3.49771600 | 1.67161400  |
| H                                                           | -2.87219400 | 0.79330300  | -0.77665100 | H  | 3.81465100  | -4.12165700 | 2.48695500  |
| H                                                           | -3.15729100 | -0.31173200 | 0.59669400  | H  | 2.42357500  | -3.16311400 | 1.94808600  |
| C                                                           | -1.59707400 | -0.94051000 | -0.75173200 | H  | 3.34985900  | -4.13208500 | 0.78457700  |
| C                                                           | -4.19621200 | -2.31376400 | -1.05552900 | C  | 5.78424200  | -2.84327500 | 1.17228100  |
| H                                                           | -4.58873400 | -2.75060400 | -1.97910600 | H  | 6.06188500  | -3.52270600 | 1.98754600  |
| H                                                           | -4.96298100 | -2.48070900 | -0.27584300 | H  | 5.84896600  | -3.41598200 | 0.24751700  |
| C                                                           | -2.95358000 | -3.04881300 | -0.61092900 | H  | 6.54499400  | -2.05915200 | 1.14712000  |
| C                                                           | -1.77800800 | -2.42902300 | -0.41754600 | C  | 3.97264700  | -3.25682300 | -1.75166300 |
| C                                                           | -0.58426500 | -3.06755600 | 0.18693900  | H  | 4.25298700  | -3.53409000 | -2.77522000 |
| C                                                           | -0.67155700 | -3.86393800 | 1.26455800  | H  | 4.55509000  | -3.88832400 | -1.07918400 |
| C                                                           | 0.74791600  | -2.74156500 | -0.38976700 | H  | 2.91610500  | -3.50328300 | -1.62701100 |
| S                                                           | -5.36004400 | -0.00089900 | -1.57698400 | C  | 5.70797000  | -1.43257200 | -1.86347200 |
| O                                                           | -4.93989700 | 1.33460800  | -1.97005900 | H  | 6.40385800  | -1.91778700 | -1.17664500 |
| O                                                           | -6.20863600 | -0.81542000 | -2.43260600 | H  | 5.94742400  | -1.78744300 | -2.87369800 |
| C                                                           | -6.16642400 | 0.14165300  | 0.00649600  | H  | 5.89624700  | -0.35518700 | -1.84288300 |
|                                                             |             |             |             | C  | 3.40177000  | -1.02879400 | -2.64407900 |

|   |             |             |             |                                                                  |              |                    |             |
|---|-------------|-------------|-------------|------------------------------------------------------------------|--------------|--------------------|-------------|
| H | 2.32653000  | -1.14976700 | -2.48431600 | C                                                                | 2.67616000   | 2.36949600         | -2.18064900 |
| H | 3.62692200  | 0.03556600  | -2.65968700 | C                                                                | 2.12330800   | 1.88734900         | -3.53063500 |
| H | 3.65415800  | -1.43297400 | -3.63238800 | H                                                                | 2.94073600   | 1.75144700         | -4.24746100 |
| C | 4.31267400  | 0.52700300  | 0.42218500  | H                                                                | 1.58297200   | 0.94144500         | -3.43460700 |
| C | 3.51733100  | 1.69280200  | 0.54902700  | H                                                                | 1.43586400   | 2.62107700         | -3.96513300 |
| C | 5.69748100  | 0.64347400  | 0.62014300  | C                                                                | 3.15009000   | 3.82690000         | -2.31032300 |
| C | 4.15811100  | 2.89525600  | 0.88538100  | H                                                                | 2.30168700   | 4.48952200         | -2.51597300 |
| C | 6.30855300  | 1.84378900  | 0.95332100  | H                                                                | 3.63972900   | 4.17521600         | -1.39663000 |
| H | 6.32151500  | -0.23462500 | 0.51814700  | H                                                                | 3.86517300   | 3.92189300         | -3.13569000 |
| C | 5.52647300  | 2.98257200  | 1.09657500  | H                                                                | 3.55703600   | 1.77352400         | -1.92913900 |
| H | 3.54664300  | 3.78834100  | 0.97081600  |                                                                  |              |                    |             |
| H | 7.38324800  | 1.88351900  | 1.10114300  |                                                                  |              |                    |             |
| O | -0.68487900 | -0.34562000 | 0.09673200  | <b>3-Ts4</b>                                                     |              |                    |             |
| H | 0.21532000  | -4.31864900 | 1.70037200  | Zero-point correction=                                           | 1.042441     | (Hartree/Particle) |             |
| H | -1.61745000 | -4.06390200 | 1.75695900  | Thermal correction to Energy=                                    | 1.100043     |                    |             |
| H | 1.50003000  | -3.43637200 | -0.02554200 | Thermal correction to Enthalpy=                                  | 1.100987     |                    |             |
| H | 0.74816800  | -2.74409000 | -1.48435700 | Thermal correction to Gibbs Free Energy=                         | 0.953972     |                    |             |
| H | 5.97590000  | 3.93530600  | 1.35972500  | Sum of electronic and zero-point Energies=                       | -2937.584519 |                    |             |
| C | 2.03637900  | 1.85239600  | 0.27129100  | Sum of electronic and thermal Energies=                          | -2937.526917 |                    |             |
| C | 1.66693700  | 2.24062500  | -1.04750600 | Sum of electronic and thermal Enthalpies=                        | -2937.525973 |                    |             |
| C | 1.07485100  | 2.01129800  | 1.30914800  | Sum of electronic and thermal Free Energies=                     | -2937.672988 |                    |             |
| C | 0.37171400  | 2.67706600  | -1.30964400 | HF( $\omega$ b97xd/6-311+G(d,p)/Lanl2dz, SMD[ <i>toluene</i> ])= | -2939.249158 |                    |             |
| C | -0.20544100 | 2.45037600  | 0.97590400  | N                                                                | -4.35952300  | -1.73664300        | 0.20805400  |
| C | -0.58636900 | 2.79444600  | -0.31241700 | C                                                                | -3.17924800  | -0.99735300        | -0.25530100 |
| H | 0.11739700  | 2.96652400  | -2.32305200 | H                                                                | -3.06614700  | -1.15260100        | -1.32869600 |
| H | -0.94000900 | 2.53803300  | 1.77356000  | H                                                                | -3.26566700  | 0.07960100         | -0.05015600 |
| C | -1.96972800 | 3.36940600  | -0.56220100 | C                                                                | -1.94874100  | -1.55004700        | 0.49260200  |
| H | -2.67827300 | 2.76284600  | 0.01785200  | C                                                                | -4.69833900  | -1.54210200        | 1.62105600  |
| C | -2.41130500 | 3.33604500  | -2.02597100 | H                                                                | -5.36614800  | -2.35559900        | 1.92276100  |
| H | -1.81815600 | 4.03037100  | -2.63390500 | H                                                                | -5.25498400  | -0.59766800        | 1.77496800  |
| H | -2.32513700 | 2.33463500  | -2.45760000 | C                                                                | -3.47476600  | -1.51243500        | 2.51259900  |
| H | -3.46106500 | 3.62914500  | -2.10780200 | C                                                                | -2.23508700  | -1.54462900        | 1.99400800  |
| C | -2.03995800 | 4.80522000  | -0.01570800 | C                                                                | -0.94549900  | -1.43135500        | 2.70077400  |
| H | -3.04684400 | 5.21742500  | -0.14563700 | C                                                                | -0.58318600  | -2.12606800        | 3.79509100  |
| H | -1.78681000 | 4.84369700  | 1.04914200  | C                                                                | -0.00889100  | -0.49677900        | 2.03722900  |
| H | -1.33514300 | 5.45157100  | -0.55219100 | S                                                                | -5.65440800  | -1.91732200        | -0.85597400 |
| C | 1.30475400  | 1.86656500  | 2.81240800  | O                                                                | -5.07689800  | -2.25814100        | -2.15741900 |
| H | 0.30749200  | 1.69073200  | 3.23250500  | O                                                                | -6.61470100  | -2.79085400        | -0.17600300 |
| C | 1.81834800  | 3.17686100  | 3.43181900  | C                                                                | -6.42043900  | -0.29969800        | -1.01447300 |
| H | 1.20975000  | 4.03041600  | 3.11506800  | C                                                                | -7.46773100  | 0.05712400         | -0.16145600 |
| H | 1.78073200  | 3.11576600  | 4.52562600  | C                                                                | -5.94678300  | 0.59863400         | -1.97546300 |
| H | 2.85742700  | 3.36912900  | 3.14643300  | C                                                                | -8.03258100  | 1.32769700         | -0.26919700 |
| C | 2.16218200  | 0.68990300  | 3.24523600  | H                                                                | -7.85136300  | -0.66495000        | 0.55139500  |
| H | 1.80299900  | -0.23021900 | 2.77045900  | C                                                                | -6.52304600  | 1.86350700         | -2.06821700 |
| H | 3.21016300  | 0.83942500  | 2.97933500  | H                                                                | -5.15917900  | 0.29552100         | -2.65699800 |
| H | 2.10971100  | 0.55987900  | 4.33258600  | C                                                                | -7.56744300  | 2.25144300         | -1.21520300 |
|   |             |             |             | H                                                                | -8.85571200  | 1.60195300         | 0.38618400  |

|    |             |             |             |   |             |             |             |
|----|-------------|-------------|-------------|---|-------------|-------------|-------------|
| H  | -6.16288500 | 2.55849100  | -2.82300400 | H | 6.10902000  | -1.18826700 | -1.40201900 |
| C  | -8.16538700 | 3.63535200  | -1.30818600 | C | 6.33379200  | 2.16858900  | -1.28392200 |
| H  | -8.20301200 | 3.98669300  | -2.34487900 | H | 4.75418500  | 3.47045700  | -0.65186400 |
| H  | -9.18179700 | 3.66168300  | -0.90259100 | H | 7.70178200  | 0.59698300  | -1.85972100 |
| H  | -7.56726600 | 4.36139600  | -0.74139900 | O | -0.90929500 | -0.60937200 | 0.29503900  |
| C  | -1.58849900 | -2.95551200 | -0.01060500 | H | 0.40329100  | -2.01106400 | 4.23735800  |
| H  | -0.75163900 | -3.36266400 | 0.56513900  | H | -1.25813000 | -2.82555300 | 4.27824900  |
| H  | -2.44534800 | -3.63162200 | 0.07537900  | H | -0.26797600 | 0.55581600  | 2.02607400  |
| H  | -1.28517000 | -2.90067900 | -1.06191500 | H | 1.03448900  | -0.65570000 | 2.30707600  |
| C  | -3.80281500 | -1.38836400 | 3.97904900  | H | 7.02304900  | 2.98335200  | -1.48922100 |
| H  | -2.93821300 | -1.06516600 | 4.56369200  | C | 2.79106900  | 1.96296700  | -0.01519400 |
| H  | -4.61584200 | -0.66631000 | 4.13364300  | C | 2.65596400  | 2.32236600  | 1.34845300  |
| H  | -4.15114300 | -2.34498300 | 4.39326800  | C | 1.76981100  | 2.32322400  | -0.93111700 |
| Pd | 1.12228400  | -0.98932100 | -0.09467300 | C | 1.48316100  | 2.96431800  | 1.76892200  |
| P  | 3.34171100  | -1.40416500 | -0.52056200 | C | 0.62555300  | 2.97275900  | -0.45836900 |
| C  | 3.44308900  | -2.37541500 | -2.21630200 | C | 0.45070900  | 3.29316900  | 0.88978300  |
| C  | 4.19728300  | -2.46469100 | 0.86156600  | H | 1.37857800  | 3.23877300  | 2.81618400  |
| C  | 3.96580900  | -1.71271700 | 2.18547400  | H | -0.14963300 | 3.24304200  | -1.16966800 |
| H  | 4.44161100  | -0.72809600 | 2.18247700  | C | -0.79126700 | 4.02283900  | 1.38603500  |
| H  | 2.90006400  | -1.58119600 | 2.38789400  | H | -0.74375700 | 4.02835000  | 2.48410300  |
| H  | 4.40022900  | -2.28965500 | 3.01312800  | C | -2.09655100 | 3.31188700  | 0.98322600  |
| C  | 3.46077100  | -3.81748300 | 0.95035800  | H | -2.96134300 | 3.80961200  | 1.43883500  |
| H  | 3.77749900  | -4.34128600 | 1.86237600  | H | -2.24079800 | 3.32771300  | -0.10345300 |
| H  | 2.37524900  | -3.67715300 | 0.99804700  | H | -2.09467300 | 2.26290100  | 1.29813200  |
| H  | 3.68639300  | -4.47451900 | 0.10527000  | C | -0.80110000 | 5.49224000  | 0.91921700  |
| C  | 5.71376000  | -2.71283900 | 0.74049000  | H | -1.67165400 | 6.02392200  | 1.32285700  |
| H  | 6.03161400  | -3.34573500 | 1.58033200  | H | 0.10263000  | 6.01801600  | 1.24678600  |
| H  | 5.99757600  | -3.23135900 | -0.17770100 | H | -0.84628400 | 5.55645300  | -0.17469800 |
| H  | 6.28496900  | -1.78245900 | 0.80344200  | C | 1.91443600  | 2.10881400  | -2.43707300 |
| C  | 2.19704800  | -3.28944300 | -2.28500500 | H | 2.75463900  | 1.42886500  | -2.59959200 |
| H  | 2.16653200  | -3.77859900 | -3.26857600 | C | 2.26171400  | 3.43468600  | -3.14605200 |
| H  | 2.20886600  | -4.07446400 | -1.52424600 | H | 2.39172100  | 3.27331000  | -4.22337400 |
| H  | 1.27450000  | -2.71506600 | -2.15383500 | H | 1.46360300  | 4.17460600  | -3.01026900 |
| C  | 4.67963500  | -3.25734900 | -2.48238100 | H | 3.18899400  | 3.86727300  | -2.75467800 |
| H  | 4.79012000  | -4.05989600 | -1.74842800 | C | 0.67092200  | 1.46355500  | -3.07624500 |
| H  | 4.55755600  | -3.73680700 | -3.46318900 | H | -0.19431300 | 2.13669700  | -3.05833000 |
| H  | 5.61518900  | -2.69380000 | -2.52474600 | H | 0.86955800  | 1.21985800  | -4.12728200 |
| C  | 3.32328900  | -1.34264300 | -3.35462600 | H | 0.39152600  | 0.54455500  | -2.54914600 |
| H  | 3.24176500  | -1.87407700 | -4.31229300 | C | 3.77685800  | 2.11702800  | 2.36964700  |
| H  | 2.42610300  | -0.72780100 | -3.24207700 | H | 4.49920700  | 1.41529900  | 1.94100300  |
| H  | 4.14568800  | 1.27514300  | 4.34273400  | C | 4.53000900  | 3.43857100  | 2.63428000  |
| C  | 4.48819800  | 0.07264900  | -0.74949400 | H | 3.85378900  | 4.19636200  | 3.04791200  |
| C  | 4.11131600  | 1.42846600  | -0.52694800 | H | 5.34271800  | 3.28206800  | 3.35451000  |
| C  | 5.79371700  | -0.16965000 | -1.22611000 | H | 4.96629000  | 3.84434600  | 1.71635700  |
| C  | 5.05427300  | 2.43870100  | -0.80990600 | C | 3.28887200  | 1.52457700  | 3.70539100  |
| C  | 6.70993300  | 0.84457200  | -1.49097400 | H | 2.66821800  | 2.23519000  | 4.26312300  |

|                                                             |             |             |             |    |             |             |             |
|-------------------------------------------------------------|-------------|-------------|-------------|----|-------------|-------------|-------------|
| H                                                           | 2.70089200  | 0.61422600  | 3.55521800  | H  | -0.53456700 | 1.63482900  | 1.59979400  |
| H                                                           | 4.19244900  | -0.68090000 | -3.41278700 | C  | -4.56595200 | 4.24117600  | -1.73098200 |
| <b>3a+PdL</b>                                               |             |             |             | H  | -4.03863500 | 4.42674800  | -2.67178100 |
| Zero-point correction= 1.044112 (Hartree/Particle)          |             |             |             | H  | -5.57892800 | 3.89267700  | -1.96566000 |
| Thermal correction to Energy= 1.102730                      |             |             |             | H  | -4.67202500 | 5.20531100  | -1.21462000 |
| Thermal correction to Enthalpy= 1.103675                    |             |             |             | Pd | 0.48810100  | -0.36221300 | -0.62555500 |
| Thermal correction to Gibbs Free Energy= 0.950154           |             |             |             | P  | 1.52851700  | -2.32878200 | -0.33456300 |
| Sum of electronic and zero-point Energies= -2937.646110     |             |             |             | C  | 1.50410900  | -3.38289000 | -1.98604800 |
| Sum of electronic and thermal Energies= -2937.587491        |             |             |             | C  | 0.67421200  | -3.36159100 | 1.07516100  |
| Sum of electronic and thermal Enthalpies= -2937.586547      |             |             |             | C  | 0.58202600  | -2.41875900 | 2.29045800  |
| Sum of electronic and thermal Free Energies= -2937.740068   |             |             |             | H  | 1.57238900  | -2.16833400 | 2.68131300  |
| HF(ob97xd/6-311+G(d,p)/Lanl2dz, SMD[toluene])= -2939.315106 |             |             |             | H  | 0.07049200  | -1.48708900 | 2.03044300  |
| N                                                           | -3.99590100 | 1.42344700  | 0.81209900  | H  | 0.02196100  | -2.91291800 | 3.09627100  |
| C                                                           | -2.82796900 | 0.80318800  | 0.17477400  | C  | -0.76506300 | -3.68621400 | 0.62319900  |
| H                                                           | -2.39756300 | 0.06753000  | 0.85502600  | H  | -1.33326000 | -4.06915400 | 1.48199700  |
| H                                                           | -3.08492900 | 0.31067100  | -0.77460500 | H  | -1.27023400 | -2.78863600 | 0.24929700  |
| C                                                           | -1.83424600 | 1.93492900  | -0.09699700 | H  | -0.79909400 | -4.45268200 | -0.15725200 |
| C                                                           | -4.73881200 | 2.38044600  | -0.01507100 | C  | 1.36342300  | -4.65655000 | 1.54715100  |
| H                                                           | -5.33860000 | 3.00812800  | 0.65234600  | H  | 0.74533400  | -5.11689500 | 2.33036800  |
| H                                                           | -5.44856900 | 1.86350000  | -0.68871400 | H  | 1.48335200  | -5.39921700 | 0.75454000  |
| C                                                           | -3.83674300 | 3.23632000  | -0.87842000 | H  | 2.34482100  | -4.45827100 | 1.98684600  |
| C                                                           | -2.50538500 | 3.03951200  | -0.89505300 | C  | 0.16960400  | -3.06301600 | -2.69896400 |
| C                                                           | -1.46429800 | 3.60580300  | -1.76547000 | H  | 0.16717100  | -3.54173800 | -3.68871800 |
| C                                                           | -1.38944600 | 4.80744900  | -2.35457400 | H  | -0.69830500 | -3.43561000 | -2.14773100 |
| C                                                           | -0.37745800 | 2.54267600  | -1.85334900 | H  | 0.04199700  | -1.98321300 | -2.82470100 |
| S                                                           | -4.90814000 | 0.48276100  | 1.87689400  | C  | 1.62056000  | -4.91691500 | -1.87963300 |
| O                                                           | -3.94803600 | -0.23847900 | 2.71341800  | H  | 0.81068400  | -5.36153700 | -1.29532200 |
| O                                                           | -5.91400100 | 1.38584100  | 2.44165100  | H  | 1.55651500  | -5.34283800 | -2.89065300 |
| C                                                           | -5.77060800 | -0.72854500 | 0.87116900  | H  | 2.57328800  | -5.25081900 | -1.46034500 |
| C                                                           | -7.05440700 | -0.44581000 | 0.39853900  | C  | 2.64288600  | -2.86845400 | -2.88806700 |
| C                                                           | -5.14047300 | -1.93478800 | 0.54856400  | H  | 2.56986900  | -1.78811700 | -3.03934500 |
| C                                                           | -7.70195200 | -1.37681000 | -0.41346400 | H  | 3.63305800  | -3.09583600 | -2.48212600 |
| H                                                           | -7.54573300 | 0.47586800  | 0.69153700  | H  | 2.56650400  | -3.34803000 | -3.87358000 |
| C                                                           | -5.80286900 | -2.85157700 | -0.26429500 | C  | 3.34847300  | -2.28923700 | 0.15746500  |
| H                                                           | -4.15941000 | -2.16011300 | 0.95316200  | C  | 4.07996700  | -1.09656400 | 0.42452000  |
| C                                                           | -7.08754000 | -2.58675000 | -0.76366500 | C  | 4.05301500  | -3.51001500 | 0.21921900  |
| H                                                           | -8.70574600 | -1.16319000 | -0.77242000 | C  | 5.45556000  | -1.20875900 | 0.72055100  |
| H                                                           | -5.31794600 | -3.79391400 | -0.50732100 | C  | 5.40990100  | -3.59638200 | 0.51861900  |
| C                                                           | -7.78288200 | -3.57970100 | -1.66449600 | H  | 3.52352100  | -4.43180000 | 0.02433700  |
| H                                                           | -8.86551300 | -3.41947100 | -1.67851900 | C  | 6.12315500  | -2.42796600 | 0.77013500  |
| H                                                           | -7.42357200 | -3.49133200 | -2.69837200 | H  | 6.00867500  | -0.29386400 | 0.91286600  |
| H                                                           | -7.59506100 | -4.61034800 | -1.34452700 | H  | 5.89855400  | -4.56675300 | 0.54969000  |
| C                                                           | -1.16161400 | 2.43174500  | 1.18614600  | O  | -0.82964300 | 1.45134500  | -1.02730200 |
| H                                                           | -0.52580600 | 3.29997100  | 0.98447000  | H  | -0.53780300 | 5.07636100  | -2.97472000 |
| H                                                           | -1.91627400 | 2.71607100  | 1.92468500  | H  | -2.14952700 | 5.56872100  | -2.22144900 |
|                                                             |             |             |             | H  | -0.25015800 | 2.15102000  | -2.86769200 |

|                                          |            |                    |             |                                                                  |                                    |
|------------------------------------------|------------|--------------------|-------------|------------------------------------------------------------------|------------------------------------|
| H                                        | 0.59306700 | 2.90190600         | -1.49372900 | Sum of electronic and zero-point Energies=                       | -2937.532226                       |
| H                                        | 7.18473100 | -2.45989600        | 1.00097000  | Sum of electronic and thermal Energies=                          | -2937.4703753                      |
| C                                        | 3.59848600 | 0.34127800         | 0.43940500  | Sum of electronic and thermal Enthalpies=                        | -2937.469431                       |
| C                                        | 3.72582400 | 1.14126100         | -0.72428800 | Sum of electronic and thermal Free Energies=                     | -2937.639441                       |
| C                                        | 3.29848500 | 0.96731800         | 1.67433400  | HF( $\omega$ b97xd/6-311+G(d,p)/Lanl2dz, SMD[ <i>toluene</i> ])= | -2939.206013                       |
| C                                        | 3.53502100 | 2.52541400         | -0.63208900 | N                                                                | 7.21945000 -0.82069100 0.32959700  |
| C                                        | 3.10674400 | 2.35461500         | 1.70822200  | C                                                                | 6.25881300 -0.23114100 1.25213900  |
| C                                        | 3.23084300 | 3.15995800         | 0.57566800  | H                                                                | 6.79760000 0.22653600 2.08893000   |
| H                                        | 3.66665000 | 3.12737300         | -1.52798400 | H                                                                | 5.66927500 0.55059100 0.75919500   |
| H                                        | 2.88848100 | 2.83137200         | 2.66111400  | C                                                                | 5.29076000 -1.23169100 1.88957500  |
| C                                        | 3.13828800 | 4.67725200         | 0.69447300  | C                                                                | 6.79701900 -0.88978600 -1.07572100 |
| H                                        | 2.73168200 | 4.89698400         | 1.69136100  | H                                                                | 7.68531500 -1.06238500 -1.68781800 |
| C                                        | 2.19626800 | 5.32208700         | -0.33683400 | H                                                                | 6.34374200 0.06444500 -1.37287100  |
| H                                        | 2.54905100 | 5.15854400         | -1.36240700 | C                                                                | 5.82574400 -2.03579600 -1.27053500 |
| H                                        | 1.17941000 | 4.92134200         | -0.26264400 | C                                                                | 4.53390500 -1.80860300 -1.23937800 |
| H                                        | 2.14136300 | 6.40606900         | -0.17970800 | C                                                                | 3.27346400 -1.55626400 -1.14865700 |
| C                                        | 4.54084000 | 5.31571400         | 0.62012900  | C                                                                | 2.12865500 -1.40094700 -0.24043100 |
| H                                        | 4.48499200 | 6.40080700         | 0.77180500  | C                                                                | 2.01290400 -1.19051500 -1.80789500 |
| H                                        | 5.20569500 | 4.89705200         | 1.38345700  | H                                                                | 2.14924200 -0.53875700 0.42402000  |
| H                                        | 5.00213800 | 5.13564000         | -0.35852800 | H                                                                | 1.71377900 -2.31016300 0.18941900  |
| C                                        | 4.15541300 | 0.55818000         | -2.06944600 | H                                                                | 1.51390100 -1.95870900 -2.39515600 |
| H                                        | 4.14043500 | -0.53078900        | -1.98134900 | H                                                                | 1.93455500 -0.17811700 -2.20221800 |
| C                                        | 5.60209600 | 0.96479900         | -2.41683500 | S                                                                | 8.84283000 -0.64051500 0.66289000  |
| H                                        | 5.91209500 | 0.51271500         | -3.36719200 | O                                                                | 8.97751700 -0.79864000 2.10276300  |
| H                                        | 5.69719200 | 2.05291500         | -2.51607300 | O                                                                | 9.55048500 -1.49600800 -0.27472700 |
| H                                        | 6.30388100 | 0.63742700         | -1.64193000 | C                                                                | 9.22985100 1.05069300 0.26398700   |
| C                                        | 3.19183100 | 0.93598700         | -3.20943900 | C                                                                | 9.56754700 1.38615700 -1.04555600  |
| H                                        | 3.19822000 | 2.01444800         | -3.40912100 | C                                                                | 9.13185600 2.02985500 1.24889900   |
| H                                        | 3.48289400 | 0.43109100         | -4.13901900 | C                                                                | 9.79426500 2.71842300 -1.36647600  |
| H                                        | 2.16668700 | 0.63886300         | -2.95829500 | H                                                                | 9.67803200 0.60839700 -1.79384400  |
| C                                        | 3.25690100 | 0.20126700         | 2.99657900  | C                                                                | 9.36255600 3.35808800 0.90958900   |
| H                                        | 3.24545800 | -0.86748000        | 2.76375700  | H                                                                | 8.90626800 1.74852900 2.27202400   |
| C                                        | 1.99765300 | 0.50942400         | 3.82816700  | C                                                                | 9.68827100 3.72317400 -0.39933700  |
| H                                        | 1.94941400 | -0.15171800        | 4.70174700  | H                                                                | 10.06778900 2.98239200 -2.38455400 |
| H                                        | 1.99872000 | 1.53996100         | 4.20171600  | H                                                                | 9.29630100 4.12318000 1.67833800   |
| H                                        | 1.08610200 | 0.36489300         | 3.24110400  | C                                                                | 9.90677000 5.16838000 -0.76685700  |
| C                                        | 4.52456300 | 0.46914200         | 3.83508300  | H                                                                | 10.66825300 5.27076800 -1.54593900 |
| H                                        | 4.61011600 | 1.53255600         | 4.08931700  | H                                                                | 8.98075400 5.61304100 -1.15064900  |
| H                                        | 4.49277000 | -0.09925900        | 4.77290600  | H                                                                | 10.22230300 5.75780300 0.09891500  |
| H                                        | 5.43185100 | 0.17919000         | 3.29523400  | C                                                                | 5.83359200 -2.59548900 2.23055600  |
|                                          |            |                    |             | H                                                                | 5.87090100 -3.20517700 1.32192900  |
|                                          |            |                    |             | H                                                                | 6.85669500 -2.52399300 2.61316300  |
|                                          |            |                    |             | H                                                                | 5.17588100 -3.07633100 2.95677500  |
|                                          |            |                    |             | C                                                                | 6.43918200 -3.40573400 -1.41550500 |
|                                          |            |                    |             | H                                                                | 6.94791000 -3.49942100 -2.38304300 |
|                                          |            |                    |             | H                                                                | 7.19944200 -3.55877500 -0.63998600 |
| <b>3-Int1'</b>                           |            |                    |             |                                                                  |                                    |
| Zero-point correction=                   | 1.036507   | (Hartree/Particle) |             |                                                                  |                                    |
| Thermal correction to Energy=            | 1.098358   |                    |             |                                                                  |                                    |
| Thermal correction to Enthalpy=          | 1.099302   |                    |             |                                                                  |                                    |
| Thermal correction to Gibbs Free Energy= | 0.929291   |                    |             |                                                                  |                                    |

|    |             |             |             |                                                                  |              |                    |             |
|----|-------------|-------------|-------------|------------------------------------------------------------------|--------------|--------------------|-------------|
| H  | 5.68758400  | -4.19535200 | -1.34181400 | H                                                                | -7.39709000  | 1.69450400         | 2.68581400  |
| Pd | -0.17003600 | -0.61821100 | -0.73688100 | H                                                                | -8.33072500  | 1.15132600         | -1.43718500 |
| P  | -2.33297500 | 0.13045900  | -0.48650000 | C                                                                | -8.94007600  | 2.73089500         | 0.70489900  |
| C  | -2.93997400 | 0.84452700  | -2.14019800 | H                                                                | -8.94368900  | 3.08769400         | 1.74321500  |
| C  | -2.34648800 | 1.44780500  | 0.88410500  | C                                                                | -8.53740700  | 3.90983700         | -0.19153900 |
| C  | -2.05788300 | 0.67122800  | 2.18107900  | H                                                                | -7.53446700  | 4.26945200         | 0.06055000  |
| H  | -2.85408900 | -0.03529600 | 2.42556900  | H                                                                | -8.53147900  | 3.61424100         | -1.24725000 |
| H  | -1.12161000 | 0.10826600  | 2.09655600  | H                                                                | -9.24200400  | 4.74166200         | -0.07906500 |
| H  | -1.96230300 | 1.37635900  | 3.01648000  | C                                                                | -10.35785300 | 2.24491600         | 0.37650700  |
| C  | -1.15538600 | 2.39299100  | 0.63791000  | H                                                                | -10.64838400 | 1.41195600         | 1.02486500  |
| H  | -1.04180100 | 3.05187500  | 1.50884000  | H                                                                | -11.08355700 | 3.05517500         | 0.50947300  |
| H  | -0.22218700 | 1.83709500  | 0.49438500  | H                                                                | -10.42862900 | 1.90258700         | -0.66244300 |
| H  | -1.31384900 | 3.03238700  | -0.23596900 | C                                                                | -6.74525000  | -0.95940700        | -1.93803600 |
| C  | -3.59771200 | 2.31710600  | 1.04910400  | H                                                                | -5.80157800  | -1.50998400        | -1.96328400 |
| H  | -3.52174300 | 2.87513100  | 1.99172800  | C                                                                | -7.87195700  | -2.00180300        | -1.82940800 |
| H  | -3.68098100 | 3.05930800  | 0.25327700  | H                                                                | -8.84905900  | -1.50668500        | -1.78320900 |
| H  | -4.52178700 | 1.74256800  | 1.06928400  | H                                                                | -7.86529100  | -2.66466500        | -2.70222500 |
| C  | -1.76649800 | 1.60007900  | -2.79249200 | H                                                                | -7.76593000  | -2.61941700        | -0.93338400 |
| H  | -2.07489500 | 1.93872900  | -3.79071500 | C                                                                | -6.88703500  | -0.19765500        | -3.26015300 |
| H  | -1.47106900 | 2.48434900  | -2.22114400 | H                                                                | -6.14527200  | 0.59645500         | -3.35822600 |
| H  | -0.88760500 | 0.95484000  | -2.89461000 | H                                                                | -6.75576800  | -0.88968700        | -4.09925100 |
| C  | -4.13904500 | 1.79663100  | -2.08942700 | H                                                                | -7.88159600  | 0.25102100         | -3.36411000 |
| H  | -3.85172500 | 2.77114800  | -1.68762300 | C                                                                | -5.57049400  | -0.27027800        | 2.95658600  |
| H  | -4.50072700 | 1.97407700  | -3.11074400 | H                                                                | -4.66305600  | -0.82187200        | 2.69629200  |
| H  | -4.96944600 | 1.41475000  | -1.49320700 | C                                                                | -5.18425400  | 0.83769500         | 3.94323600  |
| C  | -3.24596200 | -0.36843700 | -3.03401300 | H                                                                | -6.06807700  | 1.32196400         | 4.37394700  |
| H  | -2.37983000 | -1.03784700 | -3.09083000 | H                                                                | -4.61300100  | 0.40872600         | 4.77373400  |
| H  | -4.09502500 | -0.94862900 | -2.66994800 | H                                                                | -4.57010800  | 1.60837700         | 3.47349100  |
| H  | -3.48067100 | -0.02361800 | -4.04912500 | C                                                                | -6.52058700  | -1.26265900        | 3.64832500  |
| C  | -3.48881700 | -1.30840500 | -0.00801000 | H                                                                | -6.06765200  | -1.64679900        | 4.56944400  |
| C  | -4.86833500 | -1.43954200 | 0.32171700  | H                                                                | -7.46456600  | -0.77080800        | 3.91110400  |
| C  | -2.73655900 | -2.50047200 | -0.01524300 | H                                                                | -6.75260500  | -2.11488400        | 3.00365300  |
| C  | -5.37635100 | -2.71582400 | 0.61243700  |                                                                  |              |                    |             |
| C  | -3.26132100 | -3.75364300 | 0.27141300  | <b>3-Ts1'</b>                                                    |              |                    |             |
| H  | -1.67907900 | -2.42494900 | -0.26126000 | Zero-point correction=                                           | 1.036522     | (Hartree/Particle) |             |
| C  | -4.60389500 | -3.86707700 | 0.59189200  | Thermal correction to Energy=                                    | 1.097045     |                    |             |
| H  | -6.42960300 | -2.79097900 | 0.86489700  | Thermal correction to Enthalpy=                                  | 1.097990     |                    |             |
| H  | -2.61569500 | -4.62629400 | 0.24397800  | Thermal correction to Gibbs Free Energy=                         | 0.934402     |                    |             |
| O  | 4.16382400  | -0.87601200 | 2.15878600  | Sum of electronic and zero-point Energies=                       | -2937.527589 |                    |             |
| H  | -5.05000900 | -4.82953400 | 0.82459200  | Sum of electronic and thermal Energies=                          | -2937.467066 |                    |             |
| C  | -5.91824900 | -0.36489300 | 0.41747500  | Sum of electronic and thermal Enthalpies=                        | -2937.466122 |                    |             |
| C  | -6.20938900 | 0.22544000  | 1.66425600  | Sum of electronic and thermal Free Energies=                     | -2937.629710 |                    |             |
| C  | -6.75261400 | -0.08660000 | -0.68762100 | HF( $\omega$ b97xd/6-311+G(d,p)/Lanl2dz, SMD[ <i>toluene</i> ])= | -2939.200523 |                    |             |
| C  | -7.19091600 | 1.21612800  | 1.73147800  | N                                                                | -7.21782000  | -0.83445200        | -0.03478600 |
| C  | -7.71251600 | 0.91736500  | -0.57425400 | C                                                                | -6.47912800  | -0.55561900        | -1.26835700 |
| C  | -7.92166200 | 1.60968000  | 0.61638400  | H                                                                | -7.19631300  | -0.38290700        | -2.07828300 |

|    |              |             |             |   |             |             |             |
|----|--------------|-------------|-------------|---|-------------|-------------|-------------|
| H  | -5.85880300  | 0.34238200  | -1.16192900 | H | 2.61103800  | -2.12796700 | -3.34459000 |
| C  | -5.57568800  | -1.70021200 | -1.75851500 | C | 1.22894500  | 0.12306800  | -2.87734800 |
| C  | -6.53343800  | -0.47936600 | 1.22846700  | H | 1.29311100  | -0.19410100 | -3.92729900 |
| H  | -7.29458600  | -0.40885300 | 2.00933800  | H | 0.33450400  | -0.32582800 | -2.43348200 |
| H  | -6.05154300  | 0.50024000  | 1.11799700  | H | 1.10050900  | 1.20865400  | -2.87109000 |
| C  | -5.50976300  | -1.53284200 | 1.62660400  | C | 3.71864100  | 0.34094100  | -2.82135400 |
| C  | -4.23112400  | -1.33534700 | 1.38670700  | H | 3.86210900  | -0.09561500 | -3.81905800 |
| C  | -2.98005100  | -1.13029400 | 1.11484900  | H | 3.55226700  | 1.41228100  | -2.96498100 |
| C  | -2.00487900  | -1.32523500 | 0.02647800  | H | 4.64641100  | 0.21779700  | -2.25982600 |
| C  | -1.75359200  | -0.52901900 | 1.66978300  | C | 1.37594700  | 2.68132700  | -0.46197200 |
| H  | -2.18319000  | -0.74736300 | -0.88056000 | H | 1.37834400  | 3.69876700  | -0.04770800 |
| H  | -1.65943600  | -2.34871400 | -0.12648900 | H | 1.45672800  | 2.77478800  | -1.54916100 |
| H  | -1.26266800  | -1.08466300 | 2.47024700  | H | 0.41441100  | 2.21223000  | -0.22464800 |
| H  | -1.75756900  | 0.55623300  | 1.78423600  | C | 3.86338500  | 2.56692600  | -0.31758500 |
| S  | -8.90564600  | -0.76237600 | -0.08314600 | H | 3.90261100  | 2.67478500  | -1.40371200 |
| O  | -9.28833700  | -1.33615300 | -1.37800000 | H | 3.91224400  | 3.58028600  | 0.10529600  |
| O  | -9.36983900  | -1.32649500 | 1.18678600  | H | 4.75668500  | 2.03031000  | -0.00230000 |
| C  | -9.37444000  | 0.97109600  | -0.10720000 | C | 2.43126200  | 1.98183400  | 1.68253300  |
| C  | -9.55372900  | 1.65561800  | 1.09849400  | H | 1.46466600  | 1.58764900  | 2.01496400  |
| C  | -9.52790200  | 1.62952000  | -1.32993800 | H | 3.21673700  | 1.42469800  | 2.19903700  |
| C  | -9.87236300  | 3.01146600  | 1.07082700  | H | 2.50014200  | 3.03194100  | 1.99581600  |
| H  | -9.46845300  | 1.12527700  | 2.04087200  | C | 3.54296600  | -1.07802400 | 0.69016600  |
| C  | -9.84691600  | 2.98650900  | -1.33753700 | C | 4.96730200  | -1.14102800 | 0.85174100  |
| H  | -9.42374200  | 1.07907600  | -2.25870400 | C | 2.79005900  | -2.07046700 | 1.36205900  |
| C  | -10.02171400 | 3.69907500  | -0.14292100 | C | 5.49908600  | -2.16637500 | 1.66257200  |
| H  | -10.01518100 | 3.54364700  | 2.00820300  | C | 3.34585200  | -3.07846300 | 2.14544100  |
| H  | -9.96947700  | 3.49869000  | -2.28867300 | H | 1.70706100  | -2.03590100 | 1.25949900  |
| C  | -10.39845700 | 5.16146800  | -0.15998900 | C | 4.72410600  | -3.12772500 | 2.30304700  |
| H  | -11.48662900 | 5.28733800  | -0.08365500 | H | 6.57664700  | -2.19534500 | 1.78926900  |
| H  | -9.95014900  | 5.70070600  | 0.68122200  | H | 2.69792100  | -3.80589500 | 2.62719300  |
| H  | -10.07769700 | 5.64762700  | -1.08680900 | O | -4.50298200 | -1.43385800 | -2.26613800 |
| C  | -6.11934400  | -3.10817300 | -1.66431100 | H | 5.19726300  | -3.89274500 | 2.91318200  |
| H  | -6.04716300  | -3.46053200 | -0.62941200 | C | 6.05594200  | -0.24071900 | 0.29846700  |
| H  | -7.17989800  | -3.13856100 | -1.93638000 | C | 6.73937500  | -0.58094700 | -0.89932000 |
| H  | -5.53223600  | -3.76715100 | -2.30764900 | C | 6.56048500  | 0.82390200  | 1.09551300  |
| C  | -6.05609800  | -2.78302800 | 2.28301900  | C | 7.78353300  | 0.24236800  | -1.34320400 |
| H  | -6.47155300  | -2.55003000 | 3.27310300  | C | 7.61589000  | 1.60321500  | 0.60818200  |
| H  | -6.87790700  | -3.20281600 | 1.69005800  | C | 8.22389000  | 1.35281600  | -0.62398400 |
| H  | -5.28095900  | -3.54383500 | 2.40668600  | H | 8.28829200  | -0.00322900 | -2.27354200 |
| Pd | 0.03733800   | -0.51323600 | 0.35188400  | H | 7.98155200  | 2.42454700  | 1.21783000  |
| P  | 2.29514400   | 0.03400700  | -0.26363300 | C | 9.35163800  | 2.22907700  | -1.15298000 |
| C  | 2.56041300   | 1.89597200  | 0.14553000  | H | 9.66305100  | 1.80506100  | -2.11756900 |
| C  | 2.51194800   | -0.32682100 | -2.14290100 | C | 8.87686000  | 3.67126700  | -1.41498800 |
| C  | 2.59495500   | -1.86234000 | -2.27943900 | H | 8.02676700  | 3.68881500  | -2.10577600 |
| H  | 3.49095400   | -2.27956500 | -1.81463500 | H | 8.56149000  | 4.16034800  | -0.48556500 |
| H  | 1.72355400   | -2.34652200 | -1.82456200 | H | 9.68449000  | 4.27176200  | -1.85079600 |



|                                                             |             |             |             |    |             |             |             |
|-------------------------------------------------------------|-------------|-------------|-------------|----|-------------|-------------|-------------|
| C                                                           | 10.58121500 | 2.21258000  | -0.22480800 | C  | 1.94473100  | -3.25328900 | 0.60672500  |
| H                                                           | 10.94297500 | 1.19098400  | -0.06436200 | C  | 1.46247100  | -3.01302200 | -1.61503700 |
| H                                                           | 11.39935200 | 2.80110200  | -0.65718100 | H  | 2.30684300  | -2.69416900 | 1.47317300  |
| H                                                           | 10.34659000 | 2.64189500  | 0.75654200  | H  | 1.81080500  | -4.32022700 | 0.82055500  |
| C                                                           | 6.06597900  | 1.08774400  | 2.52185000  | H  | 1.16665800  | -4.01169000 | -1.95119500 |
| H                                                           | 5.09578500  | 0.59653500  | 2.64022100  | H  | 1.43158700  | -2.27376800 | -2.41807600 |
| C                                                           | 7.02720500  | 0.44803700  | 3.54841200  | S  | 7.34390400  | 0.84917700  | 0.09346200  |
| H                                                           | 8.02945700  | 0.88555300  | 3.46645500  | O  | 7.93742800  | 0.88115500  | 1.43546200  |
| H                                                           | 6.66554600  | 0.62026000  | 4.56955800  | O  | 8.11731600  | 0.45937600  | -1.08811700 |
| H                                                           | 7.11914300  | -0.63191500 | 3.40173200  | C  | 6.66676400  | 2.48400700  | -0.22279600 |
| C                                                           | 5.88244500  | 2.57908600  | 2.86269000  | C  | 6.41725600  | 2.88704000  | -1.53788500 |
| H                                                           | 5.26033800  | 3.09709000  | 2.12838300  | C  | 6.37753700  | 3.33326300  | 0.84830000  |
| H                                                           | 5.40308000  | 2.67851500  | 3.84359700  | C  | 5.85778100  | 4.14132000  | -1.77201100 |
| H                                                           | 6.84285200  | 3.10428300  | 2.92104500  | H  | 6.68785800  | 2.23827900  | -2.36403600 |
| C                                                           | 6.47885300  | -1.88953600 | -1.65340100 | C  | 5.81829400  | 4.58487800  | 0.59474500  |
| H                                                           | 5.45920600  | -2.21308800 | -1.42717800 | H  | 6.61983600  | 3.02772900  | 1.86041600  |
| C                                                           | 6.61584500  | -1.78884100 | -3.18504300 | C  | 5.54183000  | 5.00599500  | -0.71351400 |
| H                                                           | 7.66240300  | -1.67366800 | -3.49045600 | H  | 5.67395500  | 4.45931000  | -2.79546700 |
| H                                                           | 6.24889100  | -2.71197500 | -3.64840200 | H  | 5.60358400  | 5.25011200  | 1.42756900  |
| H                                                           | 6.05041000  | -0.95271800 | -3.60297600 | C  | 4.90998800  | 6.35221000  | -0.97748400 |
| C                                                           | 7.43263900  | -2.99667700 | -1.14864900 | H  | 5.24432700  | 6.77185400  | -1.93209600 |
| H                                                           | 7.24638900  | -3.93355500 | -1.68798400 | H  | 3.81565100  | 6.27106400  | -1.02322400 |
| H                                                           | 8.47768400  | -2.71083800 | -1.31847800 | H  | 5.15045900  | 7.07020200  | -0.18674000 |
| H                                                           | 7.30492600  | -3.19318000 | -0.08131600 | C  | 6.55324200  | -2.26557300 | 2.32080400  |
| <b>3-Int2'</b>                                              |             |             |             | H  | 6.69184900  | -2.81758100 | 1.38458600  |
| Zero-point correction= 1.039925 (Hartree/Particle)          |             |             |             | H  | 7.41168700  | -1.59300000 | 2.42289200  |
| Thermal correction to Energy= 1.099245                      |             |             |             | H  | 6.50860900  | -2.97240300 | 3.15211500  |
| Thermal correction to Enthalpy= 1.100190                    |             |             |             | C  | 6.25737200  | -2.94571600 | -1.53590000 |
| Thermal correction to Gibbs Free Energy= 0.948625           |             |             |             | H  | 6.55968100  | -2.75140900 | -2.57479400 |
| Sum of electronic and zero-point Energies= -2937.555703     |             |             |             | H  | 7.12916100  | -2.71425700 | -0.91117500 |
| Sum of electronic and thermal Energies= -2937.496383        |             |             |             | H  | 6.02440800  | -4.00946200 | -1.44049500 |
| Sum of electronic and thermal Enthalpies= -2937.495439      |             |             |             | H  | 6.02440800  | -4.00946200 | -1.44049500 |
| Sum of electronic and thermal Free Energies= -2937.647003   |             |             |             | Pd | 0.11529700  | -2.54948200 | -0.09696100 |
| HF(ob97xd/6-311+G(d,p)/Lanl2dz, SMD[toluene])= -2939.229597 |             |             |             | P  | -2.12224700 | -1.64251200 | -0.77527500 |
| N                                                           | 6.04938000  | -0.22905300 | 0.18959500  | C  | -3.32355300 | -2.99473200 | -1.46274700 |
| C                                                           | 5.23112400  | -0.20458600 | 1.40555600  | C  | -1.94962800 | -0.17569800 | -1.99695700 |
| H                                                           | 5.58965300  | 0.59130800  | 2.06819900  | C  | -0.84157800 | 0.70856100  | -1.38529800 |
| H                                                           | 4.18461600  | 0.00960100  | 1.16129200  | H  | -1.12369800 | 1.09906200  | -0.40518500 |
| C                                                           | 5.26240400  | -1.48323900 | 2.25974700  | H  | 0.09267400  | 0.15017100  | -1.26592700 |
| C                                                           | 5.34180600  | -0.58947800 | -1.06309400 | H  | -0.65255400 | 1.56391900  | -2.04763100 |
| H                                                           | 5.98528700  | -0.29037300 | -1.89465300 | C  | -1.40438200 | -0.76064400 | -3.32078100 |
| H                                                           | 4.40072600  | -0.02753100 | -1.12385300 | H  | -1.06420800 | 0.07013900  | -3.95276800 |
| C                                                           | 5.06931300  | -2.08437700 | -1.15310700 | H  | -0.55304600 | -1.42839700 | -3.16031500 |
| C                                                           | 3.86351300  | -2.56302100 | -0.92952900 | H  | -2.17110400 | -1.30086700 | -3.88406300 |
| C                                                           | 2.64320500  | -2.98643800 | -0.69712600 | C  | -3.18104800 | 0.68739200  | -2.32211000 |
|                                                             |             |             |             | H  | -2.88571200 | 1.44900600  | -3.05740200 |
|                                                             |             |             |             | H  | -3.99408500 | 0.10907500  | -2.76492500 |

|   |             |             |             |                                                             |             |             |             |
|---|-------------|-------------|-------------|-------------------------------------------------------------|-------------|-------------|-------------|
| H | -3.56901700 | 1.20648700  | -1.44793400 | H                                                           | -7.63741100 | -1.76661400 | 2.07631400  |
| C | -2.48851300 | -3.92796900 | -2.36910100 | H                                                           | -6.43055700 | -0.68554800 | 2.78996700  |
| H | -3.13107300 | -4.74224400 | -2.73053400 | C                                                           | -7.45726600 | -1.04491600 | -0.51327700 |
| H | -2.08434300 | -3.41505000 | -3.24553100 | H                                                           | -7.06490800 | -0.86565600 | -1.51907200 |
| H | -1.64993700 | -4.36725600 | -1.82052600 | H                                                           | -7.74991900 | -2.09878000 | -0.44509000 |
| C | -4.52062100 | -2.45473200 | -2.26143600 | H                                                           | -8.37238700 | -0.45166100 | -0.40324800 |
| H | -4.21070600 | -1.99886700 | -3.20603500 | C                                                           | -2.56018300 | 2.57830100  | 1.49360500  |
| H | -5.19694300 | -3.28418900 | -2.50973600 | H                                                           | -1.95496600 | 1.66904700  | 1.57288400  |
| H | -5.09351400 | -1.71661700 | -1.69848400 | C                                                           | -1.76056700 | 3.60486800  | 0.66552800  |
| C | -3.84113800 | -3.84510500 | -0.28480400 | H                                                           | -2.20739200 | 4.60429300  | 0.71916600  |
| H | -3.02206200 | -4.27944200 | 0.29736900  | H                                                           | -0.74151000 | 3.68740500  | 1.06083400  |
| H | -4.47844000 | -3.27814600 | 0.39909700  | H                                                           | -1.69405000 | 3.32482800  | -0.38947200 |
| H | -4.43520200 | -4.67582200 | -0.68735100 | C                                                           | -2.75019600 | 3.12872100  | 2.92443700  |
| C | -2.73699300 | -1.18595100 | 0.96930900  | H                                                           | -1.78082500 | 3.39793700  | 3.36104800  |
| C | -3.62139000 | -0.22289100 | 1.54367700  | H                                                           | -3.37703000 | 4.02851700  | 2.91218200  |
| C | -2.09088700 | -2.06800000 | 1.87306800  | H                                                           | -3.22378500 | 2.39758400  | 3.58509700  |
| C | -3.79594600 | -0.23243300 | 2.94486900  |                                                             |             |             |             |
| C | -2.27752600 | -2.05352300 | 3.25123800  |                                                             |             |             |             |
| H | -1.42610400 | -2.84362000 | 1.48164000  | <b>3-Ts2'</b>                                               |             |             |             |
| C | -3.14911900 | -1.11946200 | 3.79834800  | Zero-point correction= 1.038458 (Hartree/Particle)          |             |             |             |
| H | -4.47399800 | 0.50197000  | 3.36812000  | Thermal correction to Energy= 1.097202                      |             |             |             |
| H | -1.74266600 | -2.76240500 | 3.87641000  | Thermal correction to Enthalpy= 1.098146                    |             |             |             |
| O | 4.27790500  | -1.77514900 | 2.91238900  | Thermal correction to Gibbs Free Energy= 0.942541           |             |             |             |
| H | -3.32245400 | -1.07248000 | 4.86984700  | Sum of electronic and zero-point Energies= -2937.505357     |             |             |             |
| C | -4.41385400 | 0.87529900  | 0.86877200  | Sum of electronic and thermal Energies= -2937.446613        |             |             |             |
| C | -3.90743100 | 2.20158400  | 0.86850200  | Sum of electronic and thermal Enthalpies= -2937.445669      |             |             |             |
| C | -5.73930700 | 0.63946400  | 0.41515600  | Sum of electronic and thermal Free Energies= -2937.601274   |             |             |             |
| C | -4.69304100 | 3.22722800  | 0.32556800  | HF(ωb97xd/6-311+G(d,p)/Lanl2dz, SMD[toluene])= -2939.181286 |             |             |             |
| C | -6.47322900 | 1.70244700  | -0.12247200 | N                                                           | -5.77244900 | 0.93890500  | -0.12886700 |
| C | -5.96724100 | 3.00288000  | -0.19342200 | C                                                           | -5.10445200 | 0.76914000  | 1.16467100  |
| H | -4.30033800 | 4.24038400  | 0.31147700  | H                                                           | -5.85551000 | 0.75770400  | 1.96329500  |
| H | -7.47936800 | 1.51276500  | -0.48305100 | H                                                           | -4.56389700 | -0.18255200 | 1.19872100  |
| C | -6.77926700 | 4.14418500  | -0.79152200 | C                                                           | -4.12990900 | 1.89305000  | 1.54896300  |
| H | -6.16401900 | 5.05119800  | -0.71485900 | C                                                           | -5.15372600 | 0.21664900  | -1.27627400 |
| C | -7.07479600 | 3.91240100  | -2.28577300 | H                                                           | -5.84537200 | 0.32088000  | -2.11672500 |
| H | -6.14992200 | 3.76641900  | -2.85455400 | H                                                           | -5.05498900 | -0.84884300 | -1.02651000 |
| H | -7.70164200 | 3.02496100  | -2.43408400 | C                                                           | -3.79372500 | 0.81003000  | -1.63049700 |
| H | -7.60691900 | 4.77107300  | -2.71241400 | C                                                           | -2.64539700 | 0.20229900  | -1.33228500 |
| C | -8.07872500 | 4.40174000  | -0.00479400 | C                                                           | -2.29247200 | -1.03970500 | -0.72050400 |
| H | -7.86951700 | 4.60264000  | 1.05165300  | C                                                           | -1.95685800 | -2.23124500 | -1.39216000 |
| H | -8.61474100 | 5.26489200  | -0.41718500 | C                                                           | -1.70265900 | -0.93182100 | 0.61850500  |
| H | -8.75279300 | 3.53824100  | -0.05372000 | S                                                           | -7.45256800 | 1.10379400  | -0.11071800 |
| C | -6.43204400 | -0.71482400 | 0.58915900  | O                                                           | -7.76174500 | 1.94646100  | 1.05262500  |
| H | -5.66079000 | -1.49153900 | 0.57339800  | O                                                           | -7.84799600 | 1.48783900  | -1.46751000 |
| C | -7.13569200 | -0.79782100 | 1.96248100  | C                                                           | -8.14985100 | -0.52042800 | 0.21606600  |
| H | -7.89431900 | -0.01113600 | 2.05277400  | C                                                           | -8.34201400 | -1.41600300 | -0.84040000 |
|   |             |             |             | C                                                           | -8.47197100 | -0.88584700 | 1.52526700  |

|    |              |             |             |   |             |             |             |
|----|--------------|-------------|-------------|---|-------------|-------------|-------------|
| C  | -8.84309500  | -2.68796500 | -0.57313400 | H | 2.90415200  | -2.50921900 | 2.30030400  |
| H  | -8.12797400  | -1.10781900 | -1.85812600 | C | 2.78221400  | 0.65286800  | -1.13309800 |
| C  | -8.97421000  | -2.16276000 | 1.77351300  | C | 4.14386400  | 0.37418800  | -1.45961800 |
| H  | -8.35947500  | -0.16612600 | 2.32890400  | C | 1.95153400  | 1.08108000  | -2.20174100 |
| C  | -9.15958700  | -3.08529900 | 0.73472700  | C | 4.58751400  | 0.65084800  | -2.76961600 |
| H  | -9.00078200  | -3.38136000 | -1.39577100 | C | 2.40898800  | 1.31119400  | -3.49673200 |
| H  | -9.23554100  | -2.44334400 | 2.79100500  | C | 3.75672100  | 1.12274900  | -3.78047300 |
| C  | -9.67599300  | -4.47672300 | 1.01501200  | H | 5.63022700  | 0.44941100  | -2.99583200 |
| H  | -8.84757700  | -5.18968300 | 1.12239600  | H | 1.71106600  | 1.63799300  | -4.26211000 |
| H  | -10.25755100 | -4.50979400 | 1.94191900  | O | -3.12042300 | 1.62181800  | 2.17853600  |
| H  | -10.31190300 | -4.83989700 | 0.20058100  | H | -1.57013600 | -3.08137500 | -0.84148200 |
| C  | -4.52261200  | 3.31149900  | 1.21317000  | H | -2.14913600 | -2.35277900 | -2.45339600 |
| H  | -4.33006700  | 3.49887700  | 0.15109500  | H | -1.97534400 | -0.09993200 | 1.26272300  |
| H  | -5.59398800  | 3.47010600  | 1.37336100  | H | -1.46407200 | -1.86330800 | 1.13166000  |
| H  | -3.92732300  | 4.00441700  | 1.81213200  | C | 5.19949900  | -0.28558900 | -0.60519800 |
| C  | -3.86499000  | 2.12972100  | -2.37406500 | C | 6.10916100  | 0.49898500  | 0.15554600  |
| H  | -4.22483900  | 1.97776400  | -3.40294800 | C | 5.40333200  | -1.68725500 | -0.69498200 |
| H  | -4.57017300  | 2.82993600  | -1.90724200 | C | 7.10216800  | -0.13396500 | 0.90952100  |
| H  | -2.87780900  | 2.59702200  | -2.42694300 | C | 6.40513400  | -2.26418400 | 0.10514700  |
| Pd | -0.17468900  | -0.37761400 | -0.66965400 | C | 7.25096500  | -1.52304200 | 0.92609200  |
| P  | 1.68033500   | 0.55215900  | 0.42269500  | H | 7.78371600  | 0.47694300  | 1.49416100  |
| C  | 2.32989300   | -0.46445200 | 1.92691000  | H | 6.53643600  | -3.34430600 | 0.06373900  |
| C  | 1.43620300   | 2.42615700  | 0.91693800  | C | 4.73933100  | -2.68652900 | -1.66849900 |
| C  | 0.54123500   | 3.11193900  | -0.13889800 | H | 4.74973200  | -3.64315400 | -1.12857900 |
| H  | 1.04883300   | 3.23071900  | -1.09966700 | C | 5.65526300  | -2.87513300 | -2.90123400 |
| H  | -0.39547700  | 2.56861600  | -0.29940000 | H | 6.68163500  | -3.11939200 | -2.60793000 |
| H  | 0.29595800   | 4.11913500  | 0.22187300  | H | 5.27685100  | -3.68694500 | -3.53412500 |
| C  | 0.69747500   | 2.53897800  | 2.26636300  | H | 5.68490700  | -1.96447800 | -3.50986600 |
| H  | 0.47046200   | 3.59842900  | 2.44095600  | C | 3.28771500  | -2.49079100 | -2.14049500 |
| H  | -0.25720200  | 2.00347000  | 2.26910000  | H | 2.59357600  | -2.29928000 | -1.32008100 |
| H  | 1.30440700   | 2.20248700  | 3.11046800  | H | 3.18452000  | -1.68275400 | -2.86818800 |
| C  | 2.76348600   | 3.19745500  | 0.99133200  | H | 2.96286500  | -3.41489700 | -2.63446100 |
| H  | 2.55756100   | 4.23715500  | 1.27942300  | H | 0.89263700  | 1.26199900  | -2.01744000 |
| H  | 3.45596100   | 2.78422400  | 1.72769500  | H | 4.15396200  | 1.31017500  | -4.77411200 |
| H  | 3.26381100   | 3.22150100  | 0.01924200  | C | 8.31097500  | -2.20631600 | 1.77951000  |
| C  | 1.14750600   | -0.65519100 | 2.90918600  | H | 8.22530400  | -3.28604600 | 1.59571300  |
| H  | 1.48058900   | -1.33705700 | 3.70226100  | C | 9.73651200  | -1.78225900 | 1.37746600  |
| H  | 0.81601800   | 0.26422300  | 3.38927500  | H | 9.89947900  | -0.71216900 | 1.55287300  |
| H  | 0.28808500   | -1.11337800 | 2.41503300  | H | 10.48207600 | -2.33173400 | 1.96442900  |
| C  | 3.52155100   | 0.14611100  | 2.68260700  | H | 9.92448700  | -1.97935700 | 0.31634300  |
| H  | 3.27181800   | 1.10788400  | 3.14017400  | C | 8.06843500  | -1.97322100 | 3.28307300  |
| H  | 3.81141200   | -0.53249600 | 3.49602600  | H | 8.15399700  | -0.91046100 | 3.53940200  |
| H  | 4.39369200   | 0.27660500  | 2.04001900  | H | 7.06859800  | -2.30871700 | 3.57981100  |
| C  | 2.68966400   | -1.87672500 | 1.42877500  | H | 8.80477800  | -2.52116700 | 3.88305000  |
| H  | 1.85406900   | -2.32786600 | 0.88330800  | C | 6.11156000  | 2.02717500  | 0.08700500  |
| H  | 3.57390800   | -1.88234600 | 0.79508800  | H | 5.13098200  | 2.34813200  | -0.27133400 |

|                                                                               |              |             |             |    |              |             |             |
|-------------------------------------------------------------------------------|--------------|-------------|-------------|----|--------------|-------------|-------------|
| C                                                                             | 6.36386600   | 2.71842100  | 1.44004700  | H  | -11.42438700 | -0.09233800 | -3.35874000 |
| H                                                                             | 7.39710900   | 2.58441100  | 1.78051800  | H  | -10.54070800 | -1.62099100 | -3.34825900 |
| H                                                                             | 6.19545800   | 3.79724500  | 1.34476900  | H  | -11.80407300 | -1.33125400 | -2.14812300 |
| H                                                                             | 5.70307600   | 2.34021500  | 2.22627300  | C  | -3.74449100  | 0.11874600  | 3.11124200  |
| C                                                                             | 7.15426100   | 2.51466200  | -0.94303000 | H  | -3.21126500  | 0.96450800  | 2.66318800  |
| H                                                                             | 7.14687700   | 3.60957800  | -1.00793200 | H  | -4.69370200  | 0.50967500  | 3.49199600  |
| H                                                                             | 8.16382800   | 2.19937300  | -0.65352200 | H  | -3.14011500  | -0.29981400 | 3.91939500  |
| H                                                                             | 6.95243700   | 2.11680200  | -1.94227500 | C  | -2.57088600  | 2.24272700  | 0.14029000  |
|                                                                               |              |             |             | H  | -2.58561100  | 3.10777900  | -0.53929000 |
| <b>3-Int3'</b>                                                                |              |             |             | H  | -3.17456000  | 2.52719300  | 1.01167300  |
| Zero-point correction= 1.039726 (Hartree/Particle)                            |              |             |             | H  | -1.53486500  | 2.09123800  | 0.46155800  |
| Thermal correction to Energy= 1.099652                                        |              |             |             | Pd | -0.42939600  | -0.52390200 | -0.53322700 |
| Thermal correction to Enthalpy= 1.100597                                      |              |             |             | P  | 1.86044500   | -1.25603700 | 0.08088500  |
| Thermal correction to Gibbs Free Energy= 0.941944                             |              |             |             | C  | 2.85095900   | -1.76750700 | -1.49175800 |
| Sum of electronic and zero-point Energies= -2937.560457                       |              |             |             | C  | 1.89324900   | -2.67732100 | 1.41162100  |
| Sum of electronic and thermal Energies= -2937.500531                          |              |             |             | C  | 0.77042600   | -2.41898700 | 2.44220300  |
| Sum of electronic and thermal Enthalpies= -2937.499586                        |              |             |             | H  | 0.97959800   | -1.54973800 | 3.07052100  |
| Sum of electronic and thermal Free Energies= -2937.658239                     |              |             |             | H  | -0.20889000  | -2.28239300 | 1.97326000  |
| HF( $\omega$ b97xd/6-311+G(d,p)/LanL2dz, SMD[ <i>toluene</i> ])= -2939.234523 |              |             |             | H  | 0.70667800   | -3.28930100 | 3.10828100  |
| N                                                                             | -5.28075800  | 0.67259900  | 0.60727900  | C  | 1.58739400   | -4.03228400 | 0.74153500  |
| C                                                                             | -5.11744800  | -0.71744000 | 1.05438700  | H  | 1.45441900   | -4.78515300 | 1.52891600  |
| H                                                                             | -6.02945900  | -1.04415000 | 1.56713200  | H  | 0.66312300   | -4.00496100 | 0.15617300  |
| H                                                                             | -4.95336700  | -1.37934100 | 0.19799500  | H  | 2.40212900   | -4.37928100 | 0.10102400  |
| C                                                                             | -3.97738500  | -0.94311900 | 2.06041300  | C  | 3.22402400   | -2.77584000 | 2.17241300  |
| C                                                                             | -4.63916000  | 1.00519000  | -0.69537700 | H  | 3.16693000   | -3.60167400 | 2.89473700  |
| H                                                                             | -4.99644500  | 1.99675100  | -0.98459000 | H  | 4.07340600   | -2.97191100 | 1.51449700  |
| H                                                                             | -4.95936000  | 0.27869200  | -1.44894200 | H  | 3.42607100   | -1.86160500 | 2.73721400  |
| C                                                                             | -3.12723700  | 1.01472400  | -0.54247500 | C  | 1.97827900   | -2.77802300 | -2.27882700 |
| C                                                                             | -2.37029100  | -0.01889300 | -0.95449100 | H  | 2.46344200   | -2.95751800 | -3.24709100 |
| C                                                                             | -2.67845300  | -1.28346600 | -1.62706600 | H  | 1.87146700   | -3.74460800 | -1.78686400 |
| C                                                                             | -3.42161200  | -1.57065700 | -2.71251000 | H  | 0.98034200   | -2.37495200 | -2.47354400 |
| C                                                                             | -1.64183900  | -2.15476800 | -0.98291800 | C  | 4.24553200   | -2.37109000 | -1.26466800 |
| S                                                                             | -6.71851000  | 1.45890600  | 1.00510800  | H  | 4.20301900   | -3.30662200 | -0.69840300 |
| O                                                                             | -7.04257600  | 1.03636200  | 2.37383300  | H  | 4.69857600   | -2.60343200 | -2.23816400 |
| O                                                                             | -6.52723600  | 2.86928600  | 0.65704100  | H  | 4.91408600   | -1.67952100 | -0.74983000 |
| C                                                                             | -8.00596400  | 0.80803800  | -0.06664400 | C  | 2.95478700   | -0.52374000 | -2.39577300 |
| C                                                                             | -8.19502200  | 1.36229600  | -1.33602700 | H  | 1.96721100   | -0.08781000 | -2.58578800 |
| C                                                                             | -8.79291000  | -0.26187700 | 0.36677500  | H  | 3.61036900   | 0.23934400  | -1.98179900 |
| C                                                                             | -9.16745500  | 0.82484800  | -2.17650200 | H  | 3.37343300   | -0.82797800 | -3.36425700 |
| H                                                                             | -7.60784600  | 2.22015700  | -1.64575600 | C  | 2.49848800   | 0.24970500  | 1.06454700  |
| C                                                                             | -9.76164600  | -0.78611600 | -0.48778800 | C  | 3.70898100   | 1.00334300  | 1.14878300  |
| H                                                                             | -8.66638800  | -0.65304800 | 1.37045500  | C  | 1.43235000   | 0.67356800  | 1.89679100  |
| C                                                                             | -9.95928900  | -0.26027100 | -1.77214200 | C  | 3.80066300   | 2.01530800  | 2.12712900  |
| H                                                                             | -9.32119700  | 1.26191400  | -3.16020300 | C  | 1.54238000   | 1.69275900  | 2.83938900  |
| H                                                                             | -10.38107900 | -1.61210400 | -0.14681700 | C  | 2.75575100   | 2.35704700  | 2.97910700  |
| C                                                                             | -10.98976500 | -0.85413300 | -2.70298000 | H  | 4.73194400   | 2.57051000  | 2.18628700  |

|   |             |             |             |
|---|-------------|-------------|-------------|
| H | 0.68244900  | 1.95881800  | 3.44757600  |
| O | -3.35049200 | -1.98718600 | 2.03085700  |
| H | -3.38305800 | -2.55660600 | -3.17048200 |
| H | -4.03318000 | -0.82241200 | -3.20856600 |
| H | -1.92192000 | -2.53674200 | 0.00160900  |
| H | -1.13805400 | -2.89687000 | -1.60627000 |
| C | 4.91452500  | 0.95068500  | 0.24041500  |
| C | 6.05059600  | 0.16845700  | 0.58474700  |
| C | 4.99070900  | 1.82338800  | -0.87680800 |
| C | 7.16762800  | 0.16614100  | -0.25667400 |
| C | 6.13194400  | 1.75618200  | -1.69491000 |
| C | 7.21978800  | 0.92977500  | -1.42521000 |
| H | 8.02415200  | -0.44464500 | 0.01357500  |
| H | 6.17354700  | 2.39982600  | -2.57217800 |
| C | 4.02360400  | 2.96568900  | -1.26047600 |
| H | 4.13317400  | 3.06384700  | -2.34898600 |
| C | 4.54012200  | 4.29123000  | -0.65222000 |
| H | 5.59317100  | 4.46343300  | -0.89827900 |
| H | 3.95575200  | 5.13708900  | -1.03418700 |
| H | 4.44365700  | 4.28498800  | 0.43905000  |
| C | 2.51066600  | 2.84656400  | -1.00533600 |
| H | 2.09312400  | 1.90897500  | -1.37772300 |
| H | 2.25005400  | 2.94272300  | 0.05080800  |
| H | 2.00975900  | 3.66296200  | -1.54006900 |
| H | 0.46602800  | 0.18648300  | 1.79747100  |
| H | 2.88194000  | 3.15002900  | 3.71102300  |
| C | 8.42459100  | 0.89209100  | -2.35566800 |
| H | 8.21639600  | 1.58771200  | -3.18012200 |
| C | 9.70857800  | 1.37774000  | -1.65627100 |
| H | 9.98758900  | 0.71479400  | -0.82858100 |
| H | 10.54773500 | 1.39862400  | -2.36179100 |
| H | 9.58051300  | 2.38623200  | -1.24796800 |
| C | 8.62544100  | -0.50611200 | -2.97085300 |
| H | 8.85325700  | -1.25093500 | -2.19893300 |
| H | 7.72592500  | -0.83873500 | -3.50047200 |
| H | 9.45877800  | -0.49902700 | -3.68357300 |
| C | 6.13912100  | -0.58887900 | 1.91092000  |
| H | 5.12303600  | -0.72358400 | 2.28795200  |
| C | 6.78549600  | -1.98248400 | 1.79856900  |
| H | 7.85979800  | -1.91852800 | 1.59056800  |
| H | 6.67424800  | -2.52274000 | 2.74577600  |
| H | 6.32937400  | -2.58637500 | 1.00800700  |
| C | 6.90502200  | 0.25098100  | 2.95678500  |
| H | 6.95405600  | -0.28087000 | 3.91486700  |
| H | 7.93187400  | 0.44461400  | 2.62427400  |
| H | 6.42189300  | 1.21703100  | 3.13230200  |

### 3-Ts3'

Zero-point correction= 1.038793 (Hartree/Particle)

Thermal correction to Energy= 1.096858

Thermal correction to Enthalpy= 1.097802

Thermal correction to Gibbs Free Energy= 0.945948

Sum of electronic and zero-point Energies= -2937.526812

Sum of electronic and thermal Energies= -2937.468747

Sum of electronic and thermal Enthalpies= -2937.467803

Sum of electronic and thermal Free Energies= -2937.619657

HF(ωb97xd/6-311+G(d,p)/Lanl2dz, SMD[toluene])= -2939.198639

|   |             |             |             |
|---|-------------|-------------|-------------|
| N | 5.01468900  | -0.08898000 | -0.99635600 |
| C | 3.95658800  | -0.42192100 | -0.03757300 |
| H | 3.85071300  | -1.51200100 | -0.01479300 |
| H | 4.19910800  | -0.08113700 | 0.97578600  |
| C | 2.58032900  | 0.12513600  | -0.44194600 |
| C | 5.69243100  | 1.20546200  | -0.85552700 |
| H | 6.26479400  | 1.37479500  | -1.77302600 |
| H | 6.42586700  | 1.16933200  | -0.02644000 |
| C | 4.76759300  | 2.38261100  | -0.60058600 |
| C | 3.45257500  | 2.29657200  | -0.45491500 |
| C | 2.39523100  | 3.06034500  | -0.01859000 |
| C | 1.90571000  | 2.98245200  | 1.35353100  |
| C | 1.24170100  | 3.51900400  | -0.79414500 |
| S | 5.94489200  | -1.35023200 | -1.61043000 |
| O | 5.03622200  | -2.48575300 | -1.79821700 |
| O | 6.72154300  | -0.79288000 | -2.72153300 |
| C | 7.11559100  | -1.81418900 | -0.32655900 |
| C | 8.35490000  | -1.17279800 | -0.25502600 |
| C | 6.76809700  | -2.79457200 | 0.60702800  |
| C | 9.24070600  | -1.51024700 | 0.76752200  |
| H | 8.62866200  | -0.44365200 | -1.01001600 |
| C | 7.66600300  | -3.11953300 | 1.62178600  |
| H | 5.81984800  | -3.31346100 | 0.51702800  |
| C | 8.91022500  | -2.48000600 | 1.72434600  |
| H | 10.20942400 | -1.01866500 | 0.81670400  |
| H | 7.40025500  | -3.89056700 | 2.34114500  |
| C | 9.86369900  | -2.81948800 | 2.84567200  |
| H | 10.90329800 | -2.62868700 | 2.55999200  |
| H | 9.65391300  | -2.21447900 | 3.73800100  |
| H | 9.77879200  | -3.87099400 | 3.13981500  |
| C | 2.24258600  | 0.07160100  | -1.92357900 |
| H | 1.39995500  | 0.73189400  | -2.13383000 |
| H | 3.08891700  | 0.33172800  | -2.55837200 |
| H | 1.93659100  | -0.95700100 | -2.16614300 |
| C | 5.54140600  | 3.68795100  | -0.48791000 |

|    |             |             |             |                                            |              |                    |             |
|----|-------------|-------------|-------------|--------------------------------------------|--------------|--------------------|-------------|
| H  | 6.32391600  | 3.62473800  | 0.28274200  | C                                          | -4.17406800  | -1.26080400        | 0.76366400  |
| H  | 6.05023500  | 3.93436100  | -1.43126600 | C                                          | -5.48079700  | -1.18246700        | 0.20869600  |
| H  | 4.87595000  | 4.51668100  | -0.23357200 | C                                          | -3.43462600  | -2.46463100        | 0.62286500  |
| Pd | 0.13622000  | 2.19195700  | 0.45277800  | C                                          | -5.95788900  | -2.23092200        | -0.58409700 |
| P  | -2.16107500 | 1.74413700  | -0.30866300 | C                                          | -3.95998400  | -3.47021700        | -0.20762300 |
| C  | -2.28321200 | 0.70029900  | -1.92145300 | C                                          | -5.19859300  | -3.37602400        | -0.83662400 |
| C  | -3.24892100 | 3.35442900  | -0.45322300 | H                                          | -6.95384300  | -2.15298700        | -1.01039500 |
| C  | -2.81649400 | 4.35394300  | 0.64258200  | H                                          | -3.37462100  | -4.37763700        | -0.34659700 |
| H  | -3.08278200 | 4.01120100  | 1.64538700  | C                                          | -5.70879300  | -4.49577000        | -1.73362500 |
| H  | -1.73926800 | 4.54794600  | 0.61608400  | H                                          | -4.93339900  | -5.27376400        | -1.74966700 |
| H  | -3.34095100 | 5.30367100  | 0.47431500  | C                                          | -5.91177700  | -4.01639400        | -3.18370000 |
| C  | -2.99473300 | 4.03975500  | -1.81097200 | H                                          | -6.68768800  | -3.24360400        | -3.24187400 |
| H  | -3.47520800 | 5.02652700  | -1.79879800 | H                                          | -4.98805500  | -3.59390200        | -3.59406800 |
| H  | -1.92815800 | 4.19547000  | -2.00300300 | H                                          | -6.22159700  | -4.84904200        | -3.82649400 |
| H  | -3.42519000 | 3.48492800  | -2.64785700 | C                                          | -6.99459000  | -5.13817700        | -1.17890000 |
| C  | -4.75385000 | 3.09381700  | -0.28818600 | H                                          | -7.30815000  | -5.97927700        | -1.80868400 |
| H  | -5.30074400 | 4.03984700  | -0.40249300 | H                                          | -6.84340600  | -5.51205800        | -0.16029000 |
| H  | -5.14448000 | 2.39582400  | -1.03117400 | H                                          | -7.82118900  | -4.41808400        | -1.15161900 |
| H  | -4.98071900 | 2.70272900  | 0.70734100  | C                                          | -2.15970400  | -2.89605300        | 1.38233900  |
| C  | -1.44631300 | 1.42678700  | -3.00458900 | H                                          | -1.65841400  | -3.59613000        | 0.70037000  |
| H  | -1.30277300 | 0.73353000  | -3.84278000 | C                                          | -2.57574700  | -3.72411100        | 2.62208900  |
| H  | -1.93139100 | 2.31823800  | -3.40238300 | H                                          | -3.26704000  | -4.53095400        | 2.35639100  |
| H  | -0.45776200 | 1.70865000  | -2.63400900 | H                                          | -1.69131700  | -4.17060500        | 3.09227000  |
| C  | -3.69194600 | 0.43807600  | -2.47677600 | H                                          | -3.06612800  | -3.09072400        | 3.36985200  |
| H  | -4.20236600 | 1.36197200  | -2.76722200 | C                                          | -1.08481700  | -1.87428300        | 1.79096600  |
| H  | -3.60682300 | -0.18011900 | -3.38081900 | H                                          | -0.74443200  | -1.24801800        | 0.96528500  |
| H  | -4.32077400 | -0.10394600 | -1.76931100 | H                                          | -1.40627800  | -1.22471900        | 2.60823700  |
| C  | -1.56865200 | -0.63717800 | -1.64263600 | H                                          | -0.20837900  | -2.42924700        | 2.14660200  |
| H  | -0.57057100 | -0.48571500 | -1.22089200 | C                                          | -6.43468800  | -0.03403300        | 0.54258600  |
| H  | -2.14324600 | -1.27403200 | -0.97327700 | C                                          | -7.26409500  | 0.46440300         | -0.65590000 |
| H  | -1.45419500 | -1.17663300 | -2.59209300 | H                                          | -7.80154000  | 1.38014000         | -0.38346400 |
| C  | -2.81269100 | 0.94681300  | 1.29894200  | H                                          | -6.63943800  | 0.68345400         | -1.52746200 |
| C  | -3.64649200 | -0.15842700 | 1.65129500  | H                                          | -8.01772200  | -0.26958600        | -0.96367600 |
| C  | -2.27074000 | 1.69403700  | 2.37451200  | C                                          | -7.38398700  | -0.44270300        | 1.69045600  |
| C  | -3.96805500 | -0.34555700 | 3.01179700  | H                                          | -7.99827900  | -1.30310700        | 1.39937200  |
| C  | -2.58058900 | 1.46889100  | 3.71319600  | H                                          | -6.83127500  | -0.71648800        | 2.59437100  |
| H  | -1.56814200 | 2.49651400  | 2.15585000  | H                                          | -8.05834200  | 0.38440700         | 1.94446500  |
| C  | -3.46958200 | 0.45075300  | 4.03742300  | H                                          | -5.83576200  | 0.80481200         | 0.90390000  |
| H  | -4.61411300 | -1.18171600 | 3.26117300  |                                            |              |                    |             |
| H  | -2.12531000 | 2.08559100  | 4.48302300  |                                            |              |                    |             |
| O  | 1.67717700  | 0.10649100  | 0.42067400  | <b>3-Int4'</b>                             |              |                    |             |
| H  | 1.48690600  | 3.89722200  | 1.77914500  | Zero-point correction=                     | 1.043580     | (Hartree/Particle) |             |
| H  | 2.42761600  | 2.33398700  | 2.05418600  | Thermal correction to Energy=              | 1.101772     |                    |             |
| H  | 0.82756700  | 4.48842500  | -0.51459100 | Thermal correction to Enthalpy=            | 1.102717     |                    |             |
| H  | 1.20138900  | 3.30683300  | -1.86119600 | Thermal correction to Gibbs Free Energy=   | 0.950112     |                    |             |
| H  | -3.74679300 | 0.25312600  | 5.06918000  | Sum of electronic and zero-point Energies= | -2937.586780 |                    |             |
|    |             |             |             | Sum of electronic and thermal Energies=    | -2937.528588 |                    |             |

|                                                             |             |             |             |   |             |             |             |
|-------------------------------------------------------------|-------------|-------------|-------------|---|-------------|-------------|-------------|
| Sum of electronic and thermal Enthalpies= -2937.527644      |             |             |             | H | -1.31109900 | 2.43595200  | 3.11435000  |
| Sum of electronic and thermal Free Energies= -2937.680249   |             |             |             | H | -0.23622000 | 3.17360500  | 1.91238200  |
| HF(ob97xd/6-311+G(d,p)/LanI2dz, SMD[toluene])= -2939.263453 |             |             |             | H | -1.37088300 | 4.17507500  | 2.84254200  |
| N                                                           | 5.47213300  | -0.30250500 | -1.39843900 | C | -2.30725300 | 4.33452400  | 0.40436800  |
| C                                                           | 4.33047700  | -0.59889200 | -0.52806000 | H | -2.40500300 | 5.20207400  | 1.06949700  |
| H                                                           | 4.06426500  | -1.64914900 | -0.65062800 | H | -1.36420000 | 4.44692900  | -0.13848200 |
| H                                                           | 4.55320600  | -0.40289000 | 0.53127900  | H | -3.13095900 | 4.38574300  | -0.31114900 |
| C                                                           | 3.13029000  | 0.28231200  | -0.94833800 | C | -3.70372300 | 2.98027300  | 1.98164200  |
| C                                                           | 5.94410800  | 1.08612000  | -1.39947900 | H | -3.85490400 | 3.89626600  | 2.56882500  |
| H                                                           | 6.40817000  | 1.28463100  | -2.37144100 | H | -4.53924600 | 2.89580500  | 1.28307600  |
| H                                                           | 6.73617200  | 1.23681900  | -0.64078700 | H | -3.74404000 | 2.13566300  | 2.67463200  |
| C                                                           | 4.85969800  | 2.10679100  | -1.11600800 | C | -2.15538500 | 2.59191500  | -2.37781000 |
| C                                                           | 3.58279900  | 1.75914400  | -0.84707600 | H | -2.60001600 | 2.54384900  | -3.38002500 |
| C                                                           | 2.53832800  | 2.71792600  | -0.39190100 | H | -2.25140400 | 3.62072900  | -2.03227900 |
| C                                                           | 2.79970600  | 3.67112600  | 0.52878800  | H | -1.09367400 | 2.35470900  | -2.47538500 |
| C                                                           | 1.15551700  | 2.57994100  | -0.91791500 | C | -4.38280800 | 1.91399200  | -1.42535000 |
| S                                                           | 6.63961800  | -1.48481500 | -1.62839700 | H | -4.55591600 | 2.90920000  | -1.00452200 |
| O                                                           | 5.93114800  | -2.75795200 | -1.77849500 | H | -4.79018400 | 1.92019300  | -2.44527700 |
| O                                                           | 7.54262000  | -0.97238600 | -2.66401500 | H | -4.95552000 | 1.18568000  | -0.85042700 |
| C                                                           | 7.58574500  | -1.57878000 | -0.10192000 | C | -2.70178500 | 0.19956100  | -2.19512500 |
| C                                                           | 8.75433500  | -0.82649700 | 0.03733000  | H | -1.64222400 | -0.07115400 | -2.25880400 |
| C                                                           | 7.12836200  | -2.38249000 | 0.94702600  | H | -3.24766800 | -0.60362500 | -1.70508200 |
| C                                                           | 9.45964800  | -0.87578800 | 1.23995200  | H | -3.08769000 | 0.28314900  | -3.21959000 |
| H                                                           | 9.11682300  | -0.23841900 | -0.79896900 | C | -2.44240800 | 0.05604800  | 1.39527800  |
| C                                                           | 7.84487100  | -2.41888800 | 2.14094700  | C | -3.51303300 | -0.88212300 | 1.51176100  |
| H                                                           | 6.23932800  | -2.98966900 | 0.81400600  | C | -1.41903800 | -0.02855300 | 2.37272600  |
| C                                                           | 9.01538700  | -1.66353600 | 2.31021900  | C | -3.53777700 | -1.73108000 | 2.63780400  |
| H                                                           | 10.37573400 | -0.29924400 | 1.34444900  | C | -1.45602000 | -0.89632200 | 3.46109600  |
| H                                                           | 7.49502100  | -3.05212400 | 2.95295300  | H | -0.54180500 | 0.60396300  | 2.27314700  |
| C                                                           | 9.76827100  | -1.69202100 | 3.61958600  | C | -2.54737700 | -1.74310300 | 3.61414900  |
| H                                                           | 10.81175400 | -1.38775000 | 3.48921400  | H | -4.36385900 | -2.43117200 | 2.71652100  |
| H                                                           | 9.31578000  | -1.00778800 | 4.34984800  | H | -0.63223600 | -0.90477200 | 4.16894400  |
| H                                                           | 9.75884500  | -2.69252900 | 4.06567100  | O | 2.11287200  | 0.00276100  | -0.04123600 |
| C                                                           | 2.72021000  | -0.08434800 | -2.39511800 | H | 2.02823400  | 4.36648700  | 0.85246700  |
| H                                                           | 1.87089000  | 0.52157200  | -2.72372400 | H | 3.77228000  | 3.77142000  | 0.99797800  |
| H                                                           | 3.54283900  | 0.05058400  | -3.10336900 | H | 0.52980400  | 3.43484600  | -0.66061400 |
| H                                                           | 2.40933300  | -1.13549300 | -2.41493300 | H | 1.10480800  | 2.37514100  | -1.98977700 |
| C                                                           | 5.41166100  | 3.51448300  | -1.16309000 | H | -2.61608700 | -2.42620500 | 4.45618600  |
| H                                                           | 6.02564300  | 3.74446900  | -0.28026200 | C | -4.61352100 | -1.18717600 | 0.52404300  |
| H                                                           | 6.06805600  | 3.63273200  | -2.03612200 | C | -5.89475600 | -0.58564500 | 0.65992200  |
| H                                                           | 4.62071300  | 4.26396300  | -1.22254500 | C | -4.43075900 | -2.21608000 | -0.43647800 |
| Pd                                                          | 0.31651300  | 0.88426800  | -0.07384600 | C | -6.91083000 | -0.91725400 | -0.24174300 |
| P                                                           | -1.96310500 | 1.46977800  | 0.19997400  | C | -5.48429300 | -2.48485300 | -1.32775900 |
| C                                                           | -2.88943700 | 1.55673400  | -1.48913500 | C | -6.71939200 | -1.84437500 | -1.26923700 |
| C                                                           | -2.34396800 | 3.05733300  | 1.26881000  | H | -7.88190600 | -0.44296300 | -0.13303800 |
| C                                                           | -1.24203600 | 3.20612400  | 2.34275300  | H | -5.33064600 | -3.24881500 | -2.08816300 |

|                                                             |             |             |             |    |             |             |             |
|-------------------------------------------------------------|-------------|-------------|-------------|----|-------------|-------------|-------------|
| C                                                           | -7.81927000 | -2.17131400 | -2.27037200 | C  | 6.08014400  | -0.58175700 | 1.83762600  |
| H                                                           | -7.41848800 | -2.93510500 | -2.95063700 | H  | 6.53243500  | -0.30140300 | 2.79451700  |
| C                                                           | -8.19513900 | -0.94467100 | -3.12353400 | H  | 6.90490500  | -0.92041700 | 1.18153000  |
| H                                                           | -8.61769100 | -0.14426000 | -2.50435800 | C  | 5.13147700  | -1.74641300 | 2.02812100  |
| H                                                           | -7.31916900 | -0.53912600 | -3.64169700 | C  | 3.85524600  | -1.67925800 | 1.61213100  |
| H                                                           | -8.94417700 | -1.21325500 | -3.87797000 | C  | 2.83433900  | -2.74364800 | 1.61859800  |
| C                                                           | -9.06269000 | -2.77062700 | -1.58604200 | C  | 2.51645600  | -3.53120700 | 2.66218200  |
| H                                                           | -9.81495400 | -3.05252600 | -2.33230100 | C  | 2.10055600  | -2.82796100 | 0.33459800  |
| H                                                           | -8.80475700 | -3.66410000 | -1.00698500 | S  | 6.35598100  | 1.99565100  | 1.15210200  |
| H                                                           | -9.52799700 | -2.05119100 | -0.90164200 | O  | 5.44952400  | 3.07030700  | 0.74409100  |
| C                                                           | -3.24752200 | -3.20162600 | -0.56261900 | O  | 7.14690800  | 2.06765700  | 2.38366600  |
| H                                                           | -3.22883000 | -3.47337500 | -1.62668800 | C  | 7.49965700  | 1.71102500  | -0.20389000 |
| C                                                           | -3.58803700 | -4.49852400 | 0.20975400  | C  | 8.76100700  | 1.16986300  | 0.05642300  |
| H                                                           | -4.56464400 | -4.89787200 | -0.08342100 | C  | 7.10935500  | 2.01128100  | -1.51257800 |
| H                                                           | -2.83011300 | -5.26622900 | 0.01320500  | C  | 9.62848400  | 0.91959600  | -1.00660400 |
| H                                                           | -3.60651500 | -4.31725900 | 1.29020400  | H  | 9.06453000  | 0.98019600  | 1.08044200  |
| C                                                           | -1.81117500 | -2.76982300 | -0.21823000 | C  | 7.98883200  | 1.75374600  | -2.56164400 |
| H                                                           | -1.52095900 | -1.83359500 | -0.69953600 | H  | 6.14236600  | 2.46667900  | -1.69768800 |
| H                                                           | -1.64496600 | -2.66772900 | 0.85636500  | C  | 9.25656300  | 1.19898700  | -2.32873500 |
| H                                                           | -1.12542900 | -3.54553700 | -0.57956100 | H  | 10.61494100 | 0.50966000  | -0.80383500 |
| C                                                           | -6.23682400 | 0.33595200  | 1.83270000  | H  | 7.69006600  | 1.99705900  | -3.57846700 |
| C                                                           | -7.08937000 | 1.55902800  | 1.44499500  | C  | 10.19028100 | 0.90072200  | -3.47788800 |
| H                                                           | -7.17061400 | 2.24263000  | 2.29803500  | H  | 9.95114000  | -0.06717800 | -3.93836600 |
| H                                                           | -6.65857800 | 2.11352100  | 0.60539000  | H  | 10.11389800 | 1.66002600  | -4.26359100 |
| H                                                           | -8.10986900 | 1.27329800  | 1.16534100  | H  | 11.23277700 | 0.85688300  | -3.14694800 |
| C                                                           | -6.95369000 | -0.45827700 | 2.94674600  | C  | 2.43402900  | 0.41046400  | 1.81648200  |
| H                                                           | -7.89690000 | -0.87958100 | 2.57906200  | H  | 1.66973200  | -0.18834800 | 2.32154500  |
| H                                                           | -6.33842000 | -1.28525000 | 3.31419100  | H  | 3.06815300  | 0.88779000  | 2.57065700  |
| H                                                           | -7.18360100 | 0.19518700  | 3.79723500  | H  | 1.92966900  | 1.18806100  | 1.23231700  |
| H                                                           | -5.29920900 | 0.70608600  | 2.25356800  | C  | 5.78005300  | -2.95421900 | 2.65560200  |
| <b>3-Ts4'</b>                                               |             |             |             | H  | 5.18779600  | -3.85966000 | 2.50323800  |
| Zero-point correction= 1.041509 (Hartree/Particle)          |             |             |             | H  | 6.78063900  | -3.11898100 | 2.23398200  |
| Thermal correction to Energy= 1.099893                      |             |             |             | H  | 5.91501400  | -2.81798000 | 3.73780900  |
| Thermal correction to Enthalpy= 1.100837                    |             |             |             | Pd | 0.42218400  | -1.13536600 | -0.31894700 |
| Thermal correction to Gibbs Free Energy= 0.946763           |             |             |             | P  | -1.85859000 | -1.38868800 | -0.54352600 |
| Sum of electronic and zero-point Energies= -2937.554931     |             |             |             | C  | -2.64940500 | -1.63610200 | 1.19625600  |
| Sum of electronic and thermal Energies= -2937.496548        |             |             |             | C  | -2.33046800 | -2.88322700 | -1.70354300 |
| Sum of electronic and thermal Enthalpies= -2937.495604      |             |             |             | C  | -1.37279300 | -2.87423300 | -2.91569500 |
| Sum of electronic and thermal Free Energies= -2937.649678   |             |             |             | H  | -1.54111300 | -2.01404300 | -3.56852500 |
| HF(ob97xd/6-311+G(d,p)/Lanl2dz, SMD[toluene])= -2939.249158 |             |             |             | H  | -0.32417600 | -2.86534600 | -2.59950800 |
| N                                                           | 5.41457500  | 0.60348800  | 1.28846100  | H  | -1.55061700 | -3.77879300 | -3.51309800 |
| C                                                           | 4.42104700  | 0.33348000  | 0.24238500  | C  | -2.10653400 | -4.21715400 | -0.96411800 |
| H                                                           | 4.04632500  | 1.28345800  | -0.13987900 | H  | -2.21619900 | -5.04047300 | -1.68220300 |
| H                                                           | 4.84706000  | -0.25060900 | -0.58650800 | H  | -1.09953000 | -4.28423300 | -0.53891200 |
| C                                                           | 3.27088400  | -0.47242000 | 0.87892700  | H  | -2.83484600 | -4.38679300 | -0.16710300 |
|                                                             |             |             |             | C  | -3.77110600 | -2.83330300 | -2.23432100 |



|   |             |             |             |                                                             |             |             |             |
|---|-------------|-------------|-------------|-------------------------------------------------------------|-------------|-------------|-------------|
| H | -3.95610100 | -3.71053400 | -2.86983200 | H                                                           | -8.84070900 | 3.54776100  | 1.32289500  |
| H | -4.51533700 | -2.84403400 | -1.43517400 | H                                                           | -9.57819000 | 1.94168000  | 1.21645200  |
| H | -3.93544800 | -1.94393700 | -2.84870500 | C                                                           | -6.45014900 | -0.40087200 | -1.71663200 |
| C | -1.79617500 | -2.67754500 | 1.96124900  | H                                                           | -5.54255500 | -0.69550900 | -2.24773800 |
| H | -2.14609900 | -2.70640500 | 3.00181500  | C                                                           | -7.33259300 | 0.37558200  | -2.71795700 |
| H | -1.88059700 | -3.68949800 | 1.56225700  | H                                                           | -7.60709700 | -0.26511200 | -3.56504100 |
| H | -0.73905500 | -2.39212000 | 1.96495500  | H                                                           | -8.25827400 | 0.71855600  | -2.24048000 |
| C | -4.12533600 | -2.06208700 | 1.24100600  | H                                                           | -6.81552600 | 1.25494900  | -3.11450900 |
| H | -4.28706900 | -3.04724900 | 0.79226800  | C                                                           | -7.17551100 | -1.68818200 | -1.27971000 |
| H | -4.44864100 | -2.12851600 | 2.28898100  | H                                                           | -8.16606200 | -1.47556400 | -0.86109700 |
| H | -4.77656000 | -1.34031500 | 0.74569200  | H                                                           | -7.32518100 | -2.34592500 | -2.14399400 |
| C | -2.46909800 | -0.30387200 | 1.94552700  | H                                                           | -6.60921800 | -2.24282800 | -0.52514100 |
| H | -2.73209400 | -0.44672900 | 3.00242700  | C                                                           | -3.24170200 | 2.94038400  | 0.55061800  |
| H | -1.43011500 | 0.04154600  | 1.89748200  | H                                                           | -2.44901700 | 2.38408600  | 0.04058400  |
| H | -1.74381100 | 3.75842000  | 1.88794400  | C                                                           | -3.46411300 | 4.25478900  | -0.23073300 |
| C | -2.53731500 | 0.09145500  | -1.55299400 | H                                                           | -4.26234300 | 4.84808700  | 0.23190800  |
| C | -3.71482300 | 0.90323000  | -1.55428900 | H                                                           | -2.54858100 | 4.85861600  | -0.22751500 |
| C | -1.59953300 | 0.33749300  | -2.58552600 | H                                                           | -3.74038200 | 4.06805600  | -1.27182400 |
| C | -3.91743800 | 1.77672800  | -2.64537800 | C                                                           | -2.72776600 | 3.28175400  | 1.96308800  |
| C | -1.81912900 | 1.21780400  | -3.64063300 | H                                                           | -3.38738000 | 3.98970100  | 2.47861500  |
| H | -0.64559700 | -0.18047000 | -2.54183000 | H                                                           | -2.62417400 | 2.39591200  | 2.59612600  |
| C | -3.01354400 | 1.92724600  | -3.69108800 | H                                                           | -3.11952200 | 0.47064000  | 1.54710200  |
| H | -4.81905700 | 2.38192100  | -2.63943300 | <b>3a+PdL'</b>                                              |             |             |             |
| H | -1.05537300 | 1.34736000  | -4.40263300 | Zero-point correction= 1.044503 (Hartree/Particle)          |             |             |             |
| O | 2.51465100  | -1.00245000 | -0.19739500 | Thermal correction to Energy= 1.103089                      |             |             |             |
| H | 1.72269400  | -4.27067300 | 2.59183900  | Thermal correction to Enthalpy= 1.104034                    |             |             |             |
| H | 3.03643100  | -3.45922900 | 3.61225100  | Thermal correction to Gibbs Free Energy= 0.951275           |             |             |             |
| H | 2.66579600  | -3.14135700 | -0.53735000 | Sum of electronic and zero-point Energies= -2937.622613     |             |             |             |
| H | 1.14187100  | -3.34229500 | 0.41069500  | Sum of electronic and thermal Energies= -2937.564026        |             |             |             |
| H | -3.22636100 | 2.61693900  | -4.50347100 | Sum of electronic and thermal Enthalpies= -2937.563082      |             |             |             |
| C | -4.75561200 | 1.09957600  | -0.47020800 | Sum of electronic and thermal Free Energies= -2937.715840   |             |             |             |
| C | -4.51630200 | 2.08548900  | 0.52731400  | HF(ωb97xd/6-311+G(d,p)/Lanl2dz, SMD[toluene])= -2939.291521 |             |             |             |
| C | -6.03813100 | 0.50002500  | -0.55130300 | N                                                           | 5.00249200  | 0.40736500  | 0.97600600  |
| C | -5.51597900 | 2.34997500  | 1.47158400  | C                                                           | 3.86744800  | -0.22583400 | 0.29482300  |
| C | -6.99998400 | 0.80552200  | 0.42003700  | H                                                           | 2.95295000  | -0.00614200 | 0.84519700  |
| C | -6.75713400 | 1.71215900  | 1.45306500  | H                                                           | 3.75629200  | 0.12414100  | -0.74176100 |
| H | -5.32758400 | 3.09049200  | 2.24408300  | C                                                           | 4.15145700  | -1.72848400 | 0.29400100  |
| H | -7.97489300 | 0.33007200  | 0.35447200  | C                                                           | 6.29777900  | 0.27880500  | 0.29905400  |
| C | -7.80962500 | 2.02332700  | 2.50924700  | H                                                           | 7.08457500  | 0.47055100  | 1.03614800  |
| H | -7.37417600 | 2.77063400  | 3.18669700  | H                                                           | 6.41344100  | 1.04006300  | -0.49571300 |
| C | -8.15538600 | 0.78190900  | 3.35369200  | C                                                           | 6.49223400  | -1.07932500 | -0.34314300 |
| H | -8.86867800 | 1.03891300  | 4.14611200  | C                                                           | 5.51216900  | -2.00225600 | -0.32331100 |
| H | -8.60983900 | -0.00349800 | 2.73791200  | C                                                           | 5.39532800  | -3.29565200 | -1.01404000 |
| H | -7.25977500 | 0.36087300  | 3.82361400  | C                                                           | 6.34246700  | -4.16207700 | -1.39870200 |
| C | -9.07868800 | 2.64397100  | 1.89450300  | C                                                           | 3.89970300  | -3.53584800 | -1.18965700 |
| H | -9.79554100 | 2.91452500  | 2.67910500  | S                                                           | 4.71503300  | 1.85421100  | 1.79729100  |

|    |             |             |             |   |             |             |             |
|----|-------------|-------------|-------------|---|-------------|-------------|-------------|
| O  | 3.47566500  | 1.65597200  | 2.55276700  | H | -4.04333900 | -3.92930800 | 1.01928300  |
| O  | 5.97892700  | 2.19635000  | 2.45362400  | H | -4.13247900 | -2.24072100 | 0.48686400  |
| C  | 4.39404500  | 3.09781600  | 0.54427600  | C | -1.73984600 | -3.01177100 | 1.98133500  |
| C  | 5.44998200  | 3.87371200  | 0.05967600  | H | -0.65268800 | -2.97701900 | 2.11384400  |
| C  | 3.09740300  | 3.26203000  | 0.04524300  | H | -2.16444600 | -2.12687400 | 2.46103000  |
| C  | 5.20161400  | 4.81264300  | -0.94121700 | H | -2.11942100 | -3.89707900 | 2.50872500  |
| H  | 6.44129300  | 3.76167700  | 0.48570200  | C | -1.54356800 | -0.06983200 | 0.70377300  |
| C  | 2.87051600  | 4.20421000  | -0.95522600 | C | -2.65575600 | 0.78003400  | 1.01764300  |
| H  | 2.27584100  | 2.68171400  | 0.45221000  | C | -0.31525500 | 0.25718100  | 1.32636400  |
| C  | 3.91516800  | 4.98818200  | -1.46891900 | C | -2.43394700 | 1.87233300  | 1.88554700  |
| H  | 6.01985800  | 5.42561800  | -1.31105000 | C | -0.12691000 | 1.33099700  | 2.19342700  |
| H  | 1.86160900  | 4.33937400  | -1.33715600 | H | 0.53661700  | -0.38238000 | 1.10171900  |
| C  | 3.65671100  | 5.98782100  | -2.57107200 | C | -1.20600200 | 2.16085400  | 2.47143300  |
| H  | 4.44415600  | 6.74656200  | -2.61785200 | H | -3.27992300 | 2.51731500  | 2.10218300  |
| H  | 3.61840800  | 5.49203800  | -3.55010500 | H | 0.85349100  | 1.50703800  | 2.62856900  |
| H  | 2.69829600  | 6.49927800  | -2.43070700 | O | 3.25491900  | -2.36530200 | -0.65517600 |
| C  | 3.97185000  | -2.35226400 | 1.68199800  | H | 6.08252600  | -5.08836600 | -1.90561900 |
| H  | 4.27398000  | -3.40502000 | 1.68118700  | H | 7.39562500  | -3.99990800 | -1.20088000 |
| H  | 4.57923400  | -1.81915400 | 2.41835500  | H | 3.59888500  | -3.62443200 | -2.23766000 |
| H  | 2.91738800  | -2.29093100 | 1.97298000  | H | 3.55961000  | -4.43015200 | -0.65166700 |
| C  | 7.81801300  | -1.25264000 | -1.03651100 | H | -1.10424900 | 3.01754300  | 3.13278600  |
| H  | 7.72944900  | -1.90158700 | -1.91345200 | C | -4.09881400 | 0.72335300  | 0.55137600  |
| H  | 8.21866700  | -0.28542700 | -1.36243900 | C | -4.52179000 | 1.53455400  | -0.53756600 |
| H  | 8.56662900  | -1.69976600 | -0.36793700 | C | -5.08373700 | 0.05549200  | 1.32731200  |
| Pd | 1.01664200  | -2.05804100 | -0.52650200 | C | -5.87144800 | 1.53617000  | -0.90811000 |
| P  | -1.22814000 | -1.63802500 | -0.38675700 | C | -6.41911700 | 0.08352500  | 0.90186000  |
| C  | -2.10838700 | -3.11550700 | 0.48588100  | C | -6.83579100 | 0.79372000  | -0.22341400 |
| C  | -1.89381200 | -1.37714100 | -2.17753300 | H | -6.17915400 | 2.14658800  | -1.75242900 |
| C  | -1.16338500 | -0.11559600 | -2.68828200 | H | -7.16740400 | -0.45012500 | 1.48139300  |
| H  | -1.42915500 | 0.77847700  | -2.11869600 | C | -8.29536700 | 0.78198500  | -0.65824300 |
| H  | -0.07759500 | -0.24668500 | -2.62340600 | H | -8.83889700 | 0.14913400  | 0.05682300  |
| H  | -1.43078200 | 0.06104400  | -3.73883900 | C | -8.46805200 | 0.15322400  | -2.05427900 |
| C  | -1.40436600 | -2.56693300 | -3.03387700 | H | -7.95697200 | 0.74607100  | -2.82229800 |
| H  | -1.56838800 | -2.33028500 | -4.09432300 | H | -8.05371200 | -0.86042200 | -2.08559200 |
| H  | -0.33618600 | -2.75843100 | -2.88032100 | H | -9.52917700 | 0.09797900  | -2.32617300 |
| H  | -1.95688200 | -3.48666900 | -2.81831200 | C | -8.92764800 | 2.18576600  | -0.60293600 |
| C  | -3.41011100 | -1.23442300 | -2.38551000 | H | -9.99248600 | 2.14047200  | -0.86149800 |
| H  | -3.60266500 | -0.96430500 | -3.43361900 | H | -8.83737200 | 2.62175200  | 0.39809100  |
| H  | -3.93825000 | -2.17203800 | -2.19879100 | H | -8.44361500 | 2.86992500  | -1.31010400 |
| H  | -3.85809400 | -0.46708000 | -1.75637700 | C | -3.57356800 | 2.49351300  | -1.26502400 |
| C  | -1.48519000 | -4.42767800 | -0.04039900 | H | -2.54738400 | 2.18496000  | -1.04532100 |
| H  | -1.87450900 | -5.26856400 | 0.55063000  | C | -3.74271800 | 3.93025200  | -0.72310900 |
| H  | -1.73597900 | -4.61974600 | -1.08729300 | H | -3.05424500 | 4.61536700  | -1.23338100 |
| H  | -0.39351900 | -4.40850300 | 0.04853800  | H | -4.76439500 | 4.29128200  | -0.89196600 |
| C  | -3.63318000 | -3.19539800 | 0.31212800  | H | -3.53959200 | 3.98635700  | 0.35011100  |
| H  | -3.90323600 | -3.53666200 | -0.69131700 | C | -3.74329400 | 2.50652300  | -2.79643400 |

|   |             |             |             |
|---|-------------|-------------|-------------|
| H | -4.69699300 | 2.95634500  | -3.09619300 |
| H | -2.94805100 | 3.10759300  | -3.25315000 |
| H | -3.69594300 | 1.50213100  | -3.22465500 |
| C | -4.76998800 | -0.57761600 | 2.68732100  |
| H | -3.71234100 | -0.85455800 | 2.69519900  |
| C | -5.59276900 | -1.83874200 | 3.01528900  |
| H | -5.18394100 | -2.32137700 | 3.91054000  |
| H | -6.63839900 | -1.59330800 | 3.23540800  |
| H | -5.58309100 | -2.56930700 | 2.20293000  |
| C | -4.98189200 | 0.45299700  | 3.81999800  |
| H | -6.02315800 | 0.79705200  | 3.83704500  |
| H | -4.75985500 | -0.00155300 | 4.79336600  |
| H | -4.33740000 | 1.32759400  | 3.70379900  |

**1a+ZnCl<sub>2</sub>**

Zero-point correction= 0.358323 (Hartree/Particle)

Thermal correction to Energy= 0.387144

Thermal correction to Enthalpy= 0.388089

Thermal correction to Gibbs Free Energy= 0.294755

Sum of electronic and zero-point Energies= -2324.253744

Sum of electronic and thermal Energies= -2324.224923

Sum of electronic and thermal Enthalpies= -2324.223978

Sum of electronic and thermal Free Energies= -2324.317312

HF(ωb97xd/6-311+G(d,p)/Lanl2dz, SMD[toluene])= -2324.992783

|   |             |             |             |
|---|-------------|-------------|-------------|
| N | -1.62300100 | 1.17046700  | -0.25683200 |
| C | -1.05580200 | -0.12756400 | -0.59409200 |
| H | -0.36640300 | -0.50666800 | 0.17080800  |
| H | -1.89749800 | -0.83089900 | -0.64286700 |
| C | -0.40112300 | -0.16972000 | -1.95929400 |
| C | -2.71220600 | 1.09973800  | 0.73740700  |
| H | -2.88409000 | 2.11557700  | 1.09967300  |
| H | -2.42124200 | 0.46238800  | 1.58319800  |
| C | -3.95913300 | 0.56251400  | 0.07134800  |
| C | -4.38270600 | -0.64701800 | 0.36137400  |
| C | -4.77012000 | -1.83859200 | 0.66340400  |
| C | -4.70657000 | -3.29069500 | 0.39714300  |
| C | -5.57897900 | -2.73295100 | 1.51442600  |
| H | -3.79789800 | -3.82027500 | 0.67364100  |
| H | -5.20028000 | -3.66838100 | -0.49504600 |
| H | -6.65667600 | -2.73573700 | 1.37045600  |
| H | -5.25662000 | -2.88867200 | 2.54104500  |
| S | -0.50303500 | 2.42380100  | -0.13244600 |
| O | 0.03255500  | 2.61374200  | -1.47318000 |
| O | -1.16240500 | 3.50228000  | 0.57939100  |
| C | 0.82317000  | 1.75633400  | 0.84657000  |
| C | 0.59482900  | 1.41563200  | 2.17627100  |
| C | 2.05865100  | 1.51284600  | 0.24589200  |

|    |             |             |             |
|----|-------------|-------------|-------------|
| C  | 1.60337100  | 0.79071900  | 2.89997200  |
| H  | -0.36085500 | 1.63451200  | 2.64304600  |
| C  | 3.06701000  | 0.90839100  | 0.99505400  |
| H  | 2.23363700  | 1.81986000  | -0.78144800 |
| C  | 2.84409000  | 0.51337500  | 2.32086000  |
| H  | 1.41911300  | 0.50323200  | 3.93081500  |
| H  | 4.03822400  | 0.74039700  | 0.53714700  |
| C  | 3.89927600  | -0.24227400 | 3.07876800  |
| H  | 3.83635700  | -0.05333300 | 4.15422300  |
| H  | 3.75746600  | -1.31768000 | 2.91667900  |
| H  | 4.90428200  | 0.01794900  | 2.73555600  |
| C  | -1.19089100 | 0.27610300  | -3.14578000 |
| H  | -2.23899600 | -0.02188400 | -3.04772800 |
| H  | -1.15740000 | 1.37065200  | -3.16926500 |
| H  | -0.75035900 | -0.12043800 | -4.06146400 |
| C  | -4.62824100 | 1.46355900  | -0.93653600 |
| H  | -5.00048500 | 2.37348200  | -0.45018900 |
| H  | -3.90826500 | 1.77881600  | -1.70076100 |
| H  | -5.46712500 | 0.96318700  | -1.42525600 |
| O  | 0.73791300  | -0.61545100 | -2.08960300 |
| Zn | 2.23466100  | -1.24022200 | -0.76914000 |
| Cl | 4.17816400  | -1.01659800 | -1.78322900 |
| Cl | 1.33081300  | -2.45931200 | 0.85612900  |

**3-Int1-b**

Zero-point correction= 1.042039 (Hartree/Particle)

Thermal correction to Energy= 1.108471

Thermal correction to Enthalpy= 1.109415

Thermal correction to Gibbs Free Energy= 0.936339

Sum of electronic and zero-point Energies= -3923.595162

Sum of electronic and thermal Energies= -3923.528731

Sum of electronic and thermal Enthalpies= -3923.527787

Sum of electronic and thermal Free Energies= -3923.700862

HF(ωb97xd/6-311+G(d,p)/Lanl2dz, SMD[toluene])= -3925.354956

|   |             |             |             |
|---|-------------|-------------|-------------|
| N | -5.49527900 | -0.45432500 | 0.56910600  |
| C | -4.77036400 | -0.11727300 | -0.64046700 |
| H | -5.46347500 | -0.06719700 | -1.48926500 |
| H | -4.26848400 | 0.85305700  | -0.55509000 |
| C | -3.73907700 | -1.15615600 | -1.03887000 |
| C | -4.92432900 | 0.09042200  | 1.81073300  |
| H | -5.65652400 | -0.06334800 | 2.60658900  |
| H | -4.74164800 | 1.16709900  | 1.69785000  |
| C | -3.64584900 | -0.64773800 | 2.14892100  |
| C | -2.48546400 | -0.16141800 | 1.76909300  |
| C | -1.36532800 | 0.33870400  | 1.37490200  |
| C | -0.33871200 | 0.42500600  | 0.31951900  |

|    |             |             |             |   |             |             |             |
|----|-------------|-------------|-------------|---|-------------|-------------|-------------|
| C  | -0.18578700 | 1.15138600  | 1.69798300  | C | 3.55670900  | 4.38086700  | 0.89938400  |
| H  | -0.56380600 | 1.03193300  | -0.55597500 | H | 3.86404600  | 5.23482800  | 1.51815700  |
| H  | 0.25958200  | -0.47229300 | 0.14385300  | H | 3.16002400  | 4.77285800  | -0.04111400 |
| H  | 0.50390300  | 0.73282500  | 2.42631800  | H | 2.74324500  | 3.85104700  | 1.40553300  |
| H  | -0.29916600 | 2.23230100  | 1.71722000  | C | 5.89416900  | 4.28146000  | 0.05831600  |
| S  | -7.15586800 | -0.63662500 | 0.45723000  | H | 5.60767600  | 4.71906900  | -0.90122600 |
| O  | -7.38321200 | -1.34037300 | -0.79564100 | H | 6.13034000  | 5.11387100  | 0.73421000  |
| O  | -7.58691500 | -1.17095300 | 1.73564300  | H | 6.81938500  | 3.71636800  | -0.08038400 |
| C  | -7.80262900 | 1.01006100  | 0.28769500  | C | 5.22446400  | 2.96662100  | 2.06842200  |
| C  | -8.02877800 | 1.77637800  | 1.42950200  | H | 4.42717500  | 2.41598200  | 2.57370900  |
| C  | -8.01771700 | 1.53706600  | -0.98309600 | H | 6.11004500  | 2.32598100  | 2.01646500  |
| C  | -8.46134100 | 3.08834800  | 1.28736000  | H | 5.47253200  | 3.83706700  | 2.68952400  |
| H  | -7.89391300 | 1.34021800  | 2.41376400  | C | 5.37574600  | 0.58889100  | 0.02884800  |
| C  | -8.45159600 | 2.85189300  | -1.10509100 | C | 5.02335700  | -0.69280100 | 0.51477500  |
| H  | -7.87572300 | 0.91444300  | -1.86016400 | C | 6.73969800  | 0.85688200  | -0.16907700 |
| C  | -8.67158200 | 3.64773300  | 0.02255200  | C | 6.04369400  | -1.61921500 | 0.78015900  |
| H  | -8.64855300 | 3.68661100  | 2.17486400  | C | 7.73629300  | -0.07340400 | 0.09317300  |
| H  | -8.63050800 | 3.26354400  | -2.09450500 | H | 7.03771400  | 1.82929100  | -0.53837000 |
| C  | -9.11149300 | 5.08187400  | -0.11914200 | C | 7.38433400  | -1.32750700 | 0.57572900  |
| H  | -9.75219400 | 5.38652800  | 0.71368600  | H | 5.75994200  | -2.59517900 | 1.16402700  |
| H  | -8.24300600 | 5.75121400  | -0.12961900 | H | 8.77745100  | 0.18478100  | -0.07586500 |
| H  | -9.66224200 | 5.24080400  | -1.05066500 | O | -2.71377100 | -0.74084100 | -1.57927500 |
| C  | -4.05699200 | -2.59693400 | -0.84212500 | H | 8.14376000  | -2.07232300 | 0.79437400  |
| H  | -3.95585200 | -2.82565600 | 0.22390800  | C | 3.63925300  | -1.21041600 | 0.81353700  |
| H  | -5.10451400 | -2.78190100 | -1.10254500 | C | 3.10084000  | -1.05860300 | 2.10823000  |
| H  | -3.37703900 | -3.23180800 | -1.41332100 | C | 2.98164100  | -2.03680800 | -0.11786200 |
| C  | -3.81167300 | -1.95347600 | 2.88525500  | C | 1.89961800  | -1.69279000 | 2.42120900  |
| H  | -4.16718800 | -1.77022600 | 3.90679200  | C | 1.77705400  | -2.64929400 | 0.23958100  |
| H  | -4.56997100 | -2.57695800 | 2.39507900  | C | 1.21489400  | -2.48655400 | 1.50347000  |
| H  | -2.87334100 | -2.50881100 | 2.94245600  | H | 1.48869900  | -1.58726600 | 3.42388900  |
| Pd | 2.02640900  | 1.30296400  | 0.31529800  | H | 1.28373200  | -3.28995800 | -0.48719700 |
| P  | 4.11367300  | 1.92437000  | -0.28627500 | C | -0.04808600 | -3.21083300 | 1.93634400  |
| C  | 4.76536500  | 3.44828200  | 0.68400800  | H | -0.50640400 | -2.60502800 | 2.73087000  |
| C  | 4.25657300  | 2.26824200  | -2.15629700 | C | -1.08156100 | -3.37000300 | 0.82111200  |
| C  | 3.59524600  | 1.06737000  | -2.84735200 | H | -1.36138800 | -2.39705300 | 0.40058200  |
| H  | 4.14962200  | 0.14438400  | -2.65447500 | H | -0.71940200 | -4.00106400 | 0.00416900  |
| H  | 2.56275000  | 0.93283900  | -2.51304400 | H | -1.98959000 | -3.84247000 | 1.21280600  |
| H  | 3.58270100  | 1.22769500  | -3.93305500 | C | 0.31183200  | -4.57910200 | 2.53572300  |
| C  | 3.41562800  | 3.51479000  | -2.47679200 | H | 1.01963200  | -4.47147500 | 3.36408100  |
| H  | 3.30084700  | 3.60011500  | -3.56470300 | H | -0.58273100 | -5.09110800 | 2.90934000  |
| H  | 2.41510200  | 3.43659500  | -2.03708100 | H | 0.77758600  | -5.21669100 | 1.77541200  |
| H  | 3.88277700  | 4.43955400  | -2.12386500 | C | 3.58025600  | -2.34523900 | -1.48114500 |
| C  | 5.66321300  | 2.42173600  | -2.75311300 | H | 4.38651800  | -1.62878200 | -1.66194700 |
| H  | 5.56460700  | 2.64225900  | -3.82389200 | C | 4.20644700  | -3.74804800 | -1.48990900 |
| H  | 6.24207600  | 3.23358700  | -2.30742300 | H | 3.44809500  | -4.51205100 | -1.28236500 |
| H  | 6.23873400  | 1.49558500  | -2.66593900 | H | 4.64543900  | -3.96458300 | -2.47040600 |

|                                                             |             |             |             |    |             |             |             |
|-------------------------------------------------------------|-------------|-------------|-------------|----|-------------|-------------|-------------|
| H                                                           | 4.99498300  | -3.83901600 | -0.73620700 | S  | -5.70597200 | 0.47583800  | 0.33590100  |
| C                                                           | 2.56391200  | -2.20881600 | -2.62005300 | O  | -5.71880500 | 1.50494900  | 1.36298100  |
| H                                                           | 2.03176100  | -1.25443000 | -2.56299400 | O  | -6.83718500 | 0.24082600  | -0.54193400 |
| H                                                           | 3.07199200  | -2.24627400 | -3.58986600 | C  | -5.23264900 | -1.05847700 | 1.10241800  |
| H                                                           | 1.82886900  | -3.02136400 | -2.60985200 | C  | -5.38654100 | -2.24975700 | 0.39691500  |
| C                                                           | 3.84958200  | -0.30746800 | 3.19816600  | C  | -4.58667700 | -1.03818500 | 2.33732400  |
| H                                                           | 4.65184700  | 0.26031000  | 2.72069700  | C  | -4.84722500 | -3.41947800 | 0.91912800  |
| C                                                           | 2.96993100  | 0.69451700  | 3.95248500  | H  | -5.92519700 | -2.25912300 | -0.54521300 |
| H                                                           | 2.16879900  | 0.19843500  | 4.51332900  | C  | -4.04637400 | -2.21616500 | 2.83932900  |
| H                                                           | 3.57170700  | 1.25898800  | 4.67401600  | H  | -4.51940600 | -0.11134800 | 2.89822100  |
| H                                                           | 2.51523500  | 1.40591800  | 3.25334300  | C  | -4.14210400 | -3.41537000 | 2.12652900  |
| C                                                           | 4.50798000  | -1.30133300 | 4.16589000  | H  | -4.95885300 | -4.34911900 | 0.36866600  |
| H                                                           | 5.08380800  | -0.77046400 | 4.93268900  | H  | -3.53374900 | -2.19983300 | 3.79722300  |
| H                                                           | 3.75286500  | -1.91552500 | 4.67090900  | C  | -3.46455700 | -4.66129100 | 2.63127000  |
| H                                                           | 5.18836800  | -1.97403000 | 3.63336600  | H  | -3.48859500 | -4.71748000 | 3.72366700  |
| Zn                                                          | -1.03983300 | -1.38264700 | -2.61057900 | H  | -3.93030500 | -5.56508900 | 2.22815800  |
| Cl                                                          | -0.18238900 | 0.46588700  | -3.43214900 | H  | -2.41090800 | -4.66327800 | 2.32404500  |
| Cl                                                          | -1.03693000 | -3.57449100 | -2.87332300 | C  | -3.46647600 | 3.59899900  | -0.50096800 |
|                                                             |             |             |             | H  | -3.56496500 | 3.44197700  | -1.58079500 |
| <b>3-Ts1-b</b>                                              |             |             |             | H  | -4.47415200 | 3.54561300  | -0.07585700 |
| Zero-point correction= 1.041507 (Hartree/Particle)          |             |             |             | H  | -3.00756400 | 4.57111400  | -0.31330600 |
| Thermal correction to Energy= 1.106690                      |             |             |             | C  | -4.30948700 | 1.88319700  | -3.80061100 |
| Thermal correction to Enthalpy= 1.107634                    |             |             |             | H  | -4.91391000 | 1.32028100  | -4.52250200 |
| Thermal correction to Gibbs Free Energy= 0.940603           |             |             |             | H  | -5.00819200 | 2.46591400  | -3.18687900 |
| Sum of electronic and zero-point Energies= -3923.595189     |             |             |             | H  | -3.66440300 | 2.57040800  | -4.35320300 |
| Sum of electronic and thermal Energies= -3923.530005        |             |             |             | Pd | 1.94811100  | 0.14160100  | -1.60058600 |
| Sum of electronic and thermal Enthalpies= -3923.529061      |             |             |             | P  | 3.70076200  | 0.30958600  | -0.08177300 |
| Sum of electronic and thermal Free Energies= -3923.696093   |             |             |             | C  | 3.50684700  | 1.89094400  | 0.96938000  |
| HF(ωb97xd/6-311+G(d,p)/LanL2dz, SMD[toluene])= -3925.351407 |             |             |             | C  | 5.40392900  | 0.33875400  | -0.95912300 |
| N                                                           | -4.39779500 | 0.84781900  | -0.65288300 | C  | 5.78048500  | -1.11374300 | -1.29190800 |
| C                                                           | -3.15137700 | 1.07394800  | 0.06055900  | H  | 5.97954100  | -1.71172200 | -0.39736200 |
| H                                                           | -3.24168500 | 0.81518600  | 1.12093200  | H  | 4.98973700  | -1.60248700 | -1.86796500 |
| H                                                           | -2.35592800 | 0.42842300  | -0.33047800 | H  | 6.68784400  | -1.11683400 | -1.90908500 |
| C                                                           | -2.63937100 | 2.49714000  | 0.05552600  | C  | 5.19020500  | 1.07648300  | -2.29690900 |
| C                                                           | -4.27641800 | 0.11088800  | -1.92751100 | H  | 6.12196600  | 1.04661500  | -2.87699400 |
| H                                                           | -5.28954700 | -0.07891100 | -2.28696900 | H  | 4.39652000  | 0.60421000  | -2.88532600 |
| H                                                           | -3.77254000 | -0.84915200 | -1.75904900 | H  | 4.91624700  | 2.12528600  | -2.15715700 |
| C                                                           | -3.50707400 | 0.94724200  | -2.93310400 | C  | 6.58856600  | 1.00376100  | -0.24199700 |
| C                                                           | -2.19589600 | 0.85811800  | -2.94160700 | H  | 7.46682900  | 0.95128200  | -0.89824000 |
| C                                                           | -0.91962800 | 0.76296600  | -2.74769700 | H  | 6.40908300  | 2.06098000  | -0.03176400 |
| C                                                           | 0.07050600  | 1.28364000  | -1.79829200 | H  | 6.86344200  | 0.50574400  | 0.69105100  |
| C                                                           | 0.29345100  | -0.00811400 | -3.05880600 | C  | 3.65054300  | 3.11560400  | 0.05289300  |
| H                                                           | -0.14733500 | 1.07890200  | -0.75005100 | H  | 3.32390000  | 4.01309900  | 0.59395000  |
| H                                                           | 0.48328000  | 2.26863800  | -2.01412400 | H  | 4.68532700  | 3.28655800  | -0.25758600 |
| H                                                           | 0.83006600  | 0.30256800  | -3.95617100 | H  | 3.02753300  | 3.02321900  | -0.84338800 |
| H                                                           | 0.23091100  | -1.08451500 | -2.88181000 | C  | 4.43313200  | 2.03746500  | 2.18546700  |



|    |             |             |             |   |             |             |             |
|----|-------------|-------------|-------------|---|-------------|-------------|-------------|
| C  | 2.07372300  | 3.32496800  | 2.24569700  | H | -6.20654800 | -0.72155100 | -0.10319700 |
| C  | 0.18677100  | 5.30817000  | 1.72667000  | H | -6.85203100 | -0.31794500 | -1.70354000 |
| H  | 1.26474400  | 5.64408100  | -0.11221300 | C | -3.81947300 | -0.33145800 | 1.23329500  |
| C  | 1.06294500  | 3.58902800  | 3.16096700  | C | -3.06782600 | -1.49160200 | 1.51300400  |
| H  | 2.82478700  | 2.56853700  | 2.44900300  | C | -4.86201100 | 0.01915400  | 2.10400200  |
| C  | 0.10300300  | 4.57559900  | 2.91441500  | C | -3.42721400 | -2.27170500 | 2.62156100  |
| H  | -0.54140900 | 6.08954600  | 1.52631600  | C | -5.18893300 | -0.75294000 | 3.21007500  |
| H  | 1.01773800  | 3.01577000  | 4.08292900  | H | -5.43733100 | 0.91665100  | 1.91101000  |
| C  | -1.00777600 | 4.81493600  | 3.90342100  | C | -4.47122800 | -1.91688200 | 3.46353000  |
| H  | -1.59564000 | 5.69956200  | 3.64276800  | H | -2.86449400 | -3.17938400 | 2.81721600  |
| H  | -1.68770800 | 3.95519800  | 3.93139100  | H | -6.00359600 | -0.45191500 | 3.86146800  |
| H  | -0.61332300 | 4.95386400  | 4.91528900  | O | 3.62307600  | -0.47259600 | 0.26924200  |
| C  | 4.49517600  | 0.42450200  | -1.78595200 | H | -4.72053400 | -2.54548100 | 4.31289100  |
| H  | 3.93105700  | 0.57395100  | -2.71305300 | C | -1.88042400 | -2.00285800 | 0.73132600  |
| H  | 5.12478400  | 1.31096900  | -1.64875200 | C | -2.08269000 | -2.90901100 | -0.34159400 |
| H  | 5.12206200  | -0.46782300 | -1.83604400 | C | -0.57789300 | -1.87631800 | 1.29408200  |
| C  | 2.52071600  | 2.74515900  | -4.46500100 | C | -0.98757200 | -3.62787600 | -0.84270800 |
| H  | 2.24941400  | 3.74007800  | -4.84080100 | C | 0.47206400  | -2.59863200 | 0.73882900  |
| H  | 3.53848200  | 2.82467600  | -4.06090800 | C | 0.28914300  | -3.48930100 | -0.32316000 |
| H  | 2.52999600  | 2.04834800  | -5.30627900 | H | -1.15330100 | -4.33820000 | -1.64878500 |
| Pd | -1.75001800 | -0.52955600 | -1.49705800 | H | 1.45512200  | -2.51442500 | 1.19571700  |
| P  | -3.47612800 | 0.62337300  | -0.30685100 | C | 1.44522500  | -4.32411800 | -0.84426600 |
| C  | -5.15255800 | 0.89823900  | -1.16274600 | H | 1.05774200  | -4.95915400 | -1.65136100 |
| C  | -2.74879000 | 2.26751100  | 0.30382600  | C | 2.55437000  | -3.44837600 | -1.44032800 |
| C  | -1.34905600 | 1.91100300  | 0.82402300  | H | 2.22319300  | -2.93720000 | -2.34929800 |
| H  | -1.41100000 | 1.25164700  | 1.69352500  | H | 2.83553200  | -2.66185600 | -0.72735900 |
| H  | -0.75117400 | 1.40979900  | 0.05348100  | H | 3.44796200  | -4.03525600 | -1.67625600 |
| H  | -0.82536100 | 2.82297600  | 1.13068900  | C | 1.99920600  | -5.24477200 | 0.25280300  |
| C  | -2.58268200 | 3.23649300  | -0.87586100 | H | 1.20722900  | -5.87486100 | 0.67052100  |
| H  | -2.00396500 | 4.10608900  | -0.53829600 | H | 2.77961400  | -5.89702000 | -0.15413400 |
| H  | -2.03268200 | 2.77180000  | -1.69985400 | H | 2.43877000  | -4.66994800 | 1.07571400  |
| H  | -3.53853900 | 3.60739500  | -1.25800900 | C | -0.32156100 | -1.11502200 | 2.59101000  |
| C  | -3.50572600 | 2.95964700  | 1.44556000  | H | -1.21908500 | -0.53655800 | 2.83395100  |
| H  | -2.96756700 | 3.87860600  | 1.71284900  | C | -0.07988700 | -2.10311700 | 3.74505900  |
| H  | -4.52581300 | 3.24428800  | 1.17813600  | H | 0.83513700  | -2.67982000 | 3.57257800  |
| H  | -3.54499500 | 2.33015600  | 2.33988900  | H | 0.03816900  | -1.55970000 | 4.68918200  |
| C  | -4.85194400 | 1.20667500  | -2.64158300 | H | -0.91016100 | -2.80591900 | 3.86028200  |
| H  | -5.79924100 | 1.33632200  | -3.17991400 | C | 0.85749300  | -0.14098600 | 2.50455800  |
| H  | -4.26949400 | 2.12317500  | -2.77026100 | H | 0.70457600  | 0.58954400  | 1.70889900  |
| H  | -4.29923300 | 0.38878100  | -3.11054600 | H | 0.95468200  | 0.40602000  | 3.44947600  |
| C  | -6.04315700 | 2.02115700  | -0.61125300 | H | 1.80519000  | -0.65733200 | 2.32531500  |
| H  | -5.57254100 | 3.00392700  | -0.70010200 | C | -3.48405300 | -3.29409400 | -0.80014300 |
| H  | -6.96962000 | 2.05310200  | -1.19837100 | H | -4.17971000 | -2.55101500 | -0.40287200 |
| H  | -6.33206300 | 1.86869200  | 0.43161200  | C | -3.64984700 | -3.31643100 | -2.32318000 |
| C  | -5.92975000 | -0.42772900 | -1.11977400 | H | -3.02993000 | -4.08958700 | -2.79044200 |
| H  | -5.35169900 | -1.23976000 | -1.57077000 | H | -4.69269700 | -3.53155800 | -2.58324400 |

|                                                             |             |             |             |    |             |             |             |
|-------------------------------------------------------------|-------------|-------------|-------------|----|-------------|-------------|-------------|
| H                                                           | -3.37112800 | -2.35162300 | -2.76115300 | H  | -9.09324600 | -1.71070300 | 3.65489200  |
| C                                                           | -3.87270500 | -4.64747600 | -0.18611100 | H  | -8.05177800 | -0.33978300 | 4.05551100  |
| H                                                           | -4.89816100 | -4.91409600 | -0.46531600 | H  | -9.50013700 | -0.08495900 | 3.07599100  |
| H                                                           | -3.20606400 | -5.44324100 | -0.53762900 | C  | -2.17414100 | 0.14576900  | -3.05506900 |
| H                                                           | -3.81457600 | -4.61631200 | 0.90676300  | H  | -1.41164200 | -0.58520900 | -2.76031500 |
| Zn                                                          | 4.71965800  | -2.13008400 | 0.78880800  | H  | -3.00316100 | -0.41065700 | -3.50064400 |
| Cl                                                          | 6.31946100  | -2.66548500 | -0.62471700 | H  | -1.75517100 | 0.87155700  | -3.75234100 |
| Cl                                                          | 3.89243100  | -2.78558900 | 2.72644200  | C  | -1.20812300 | -3.04144000 | -1.96428000 |
| <b>3-Ts2-b</b>                                              |             |             |             | H  | -1.24971100 | -4.12609300 | -1.78730600 |
| Zero-point correction= 1.042570 (Hartree/Particle)          |             |             |             | H  | -1.96264400 | -2.82700500 | -2.73285700 |
| Thermal correction to Energy= 1.107325                      |             |             |             | H  | -0.21444100 | -2.79963200 | -2.35360600 |
| Thermal correction to Enthalpy= 1.108269                    |             |             |             | Pd | 1.53253500  | -0.26690500 | 0.90334700  |
| Thermal correction to Gibbs Free Energy= 0.940217           |             |             |             | P  | 2.62710000  | 1.68766500  | 0.35678900  |
| Sum of electronic and zero-point Energies= -3923.569677     |             |             |             | C  | 2.88518200  | 2.88977400  | 1.81982500  |
| Sum of electronic and thermal Energies=-3923.504922         |             |             |             | C  | 1.78089500  | 2.57345800  | -1.10196100 |
| Sum of electronic and thermal Enthalpies= -3923.503978      |             |             |             | C  | 1.19149000  | 1.47370500  | -2.00703800 |
| Sum of electronic and thermal Free Energies= -3923.672031   |             |             |             | H  | 1.93143800  | 0.72830800  | -2.30263500 |
| HF(ωb97xd/6-311+G(d,p)/LanL2dz, SMD[toluene])= -3925.329990 |             |             |             | H  | 0.38899800  | 0.92619200  | -1.50866600 |
| N                                                           | -3.67295900 | -1.30561100 | -1.03962300 | H  | 0.78692600  | 1.93755500  | -2.91517900 |
| C                                                           | -3.40602600 | 0.08724300  | -0.75368700 | C  | 0.60696600  | 3.44111300  | -0.61576800 |
| H                                                           | -4.32580600 | 0.65691700  | -0.56810000 | H  | 0.03200100  | 3.76723200  | -1.49079600 |
| H                                                           | -2.83308400 | 0.16752300  | 0.17711300  | H  | -0.05459500 | 2.87596500  | 0.05013500  |
| C                                                           | -2.63072900 | 0.83258300  | -1.82107000 | H  | 0.92034300  | 4.34344800  | -0.08721200 |
| C                                                           | -2.92517000 | -2.30696200 | -0.24423000 | C  | 2.72634300  | 3.45230900  | -1.93340900 |
| H                                                           | -3.38802000 | -3.27690500 | -0.44464900 | H  | 2.15436200  | 3.91785700  | -2.74492900 |
| H                                                           | -3.02771500 | -2.07579600 | 0.82440300  | H  | 3.17080300  | 4.26061400  | -1.34499800 |
| C                                                           | -1.46995800 | -2.29019000 | -0.67761200 | H  | 3.53410800  | 2.87085700  | -2.38665300 |
| C                                                           | -0.51727100 | -1.64406900 | -0.00797100 | C  | 1.57346000  | 2.95982600  | 2.62362200  |
| C                                                           | -0.53301700 | -0.98374600 | 1.25855200  | H  | 1.72282500  | 3.62140100  | 3.48541300  |
| C                                                           | -0.12910800 | -1.55368200 | 2.46890400  | H  | 0.73064000  | 3.35481900  | 2.05182000  |
| C                                                           | -0.36274300 | 0.46784700  | 1.21458100  | H  | 1.29833400  | 1.97164300  | 3.00087000  |
| S                                                           | -5.19022000 | -1.65565700 | -1.62518300 | C  | 3.32545800  | 4.32105400  | 1.46980200  |
| O                                                           | -5.47984700 | -0.60605000 | -2.59422100 | H  | 2.63005300  | 4.83374700  | 0.80250200  |
| O                                                           | -5.18734700 | -3.06010000 | -1.99313100 | H  | 3.36939300  | 4.90501200  | 2.39717400  |
| C                                                           | -6.28802200 | -1.43224200 | -0.24509500 | H  | 4.32336900  | 4.36014800  | 1.02857800  |
| C                                                           | -6.38900100 | -2.43822500 | 0.71428800  | C  | 3.94228700  | 2.26546500  | 2.74705300  |
| C                                                           | -6.97081100 | -0.22847800 | -0.09450500 | H  | 3.63688900  | 1.26851200  | 3.07679200  |
| C                                                           | -7.17411000 | -2.22224800 | 1.83865700  | H  | 4.92737600  | 2.19340800  | 2.27725600  |
| H                                                           | -5.87454800 | -3.38260700 | 0.56962200  | H  | 4.04028700  | 2.89291200  | 3.64132800  |
| C                                                           | -7.75224300 | -0.03019600 | 1.03836500  | C  | 4.34883300  | 1.26133900  | -0.18796000 |
| H                                                           | -6.90634200 | 0.52908900  | -0.86856700 | C  | 4.75743400  | -0.08505900 | -0.27207700 |
| C                                                           | -7.85848400 | -1.01577700 | 2.02251700  | C  | 5.31081100  | 2.25575000  | -0.41733300 |
| H                                                           | -7.26121200 | -3.00574900 | 2.58653300  | C  | 6.11083900  | -0.37741500 | -0.48060100 |
| H                                                           | -8.28965400 | 0.90651700  | 1.15728200  | C  | 6.64498200  | 1.95163300  | -0.65424900 |
| C                                                           | -8.67485500 | -0.77733100 | 3.26644000  | C  | 7.05542000  | 0.62309300  | -0.65763100 |
|                                                             |             |             |             | H  | 6.41163000  | -1.41974500 | -0.53019400 |



|   |             |             |             |
|---|-------------|-------------|-------------|
| H | 7.35901400  | 2.75155900  | -0.82357600 |
| O | -2.35539100 | 2.02578700  | -1.64662300 |
| H | -0.05170400 | -0.94136400 | 3.36142200  |
| H | -0.01191400 | -2.62602400 | 2.57589100  |
| H | -0.73327700 | 0.99228000  | 0.33879800  |
| H | -0.48896900 | 1.02575900  | 2.13889900  |
| C | 3.82665900  | -1.25900500 | -0.21568600 |
| C | 3.50143200  | -1.84076100 | 1.04359300  |
| C | 3.44891800  | -1.91091600 | -1.41331300 |
| C | 2.71230800  | -3.00345700 | 1.06838900  |
| C | 2.67171400  | -3.06272200 | -1.30844600 |
| C | 2.27484400  | -3.62067500 | -0.09700100 |
| H | 2.47983000  | -3.44775300 | 2.03090100  |
| H | 2.36041500  | -3.55919300 | -2.22646100 |
| C | 3.89063400  | -1.58246400 | -2.84971200 |
| H | 3.00334500  | -1.78459000 | -3.46411900 |
| C | 4.97350700  | -2.59147600 | -3.27826400 |
| H | 4.64659800  | -3.62550400 | -3.13358200 |
| H | 5.22684300  | -2.45527400 | -4.33577700 |
| H | 5.88754600  | -2.44160400 | -2.69202400 |
| C | 4.36260500  | -0.17466500 | -3.23878500 |
| H | 3.72031000  | 0.61670600  | -2.85489700 |
| H | 5.38057100  | 0.03362600  | -2.90229700 |
| H | 4.35765400  | -0.10318500 | -4.33224400 |
| H | 5.01765100  | 3.29660200  | -0.41407000 |
| H | 8.09796900  | 0.36673700  | -0.81903200 |
| C | 1.51495800  | -4.93460800 | -0.08851500 |
| H | 1.01744100  | -5.02050300 | -1.06300200 |
| C | 2.50873700  | -6.10062200 | 0.03644900  |
| H | 3.03521900  | -6.05484700 | 0.99763600  |
| H | 1.98812600  | -7.06326900 | -0.01966300 |
| H | 3.26058100  | -6.06826500 | -0.75945600 |
| C | 0.42939900  | -5.02209700 | 0.98587200  |
| H | 0.85483400  | -4.99293100 | 1.99660100  |
| H | -0.28069900 | -4.19776800 | 0.88073400  |
| H | -0.11460200 | -5.96849100 | 0.89143900  |
| C | 4.24909800  | -1.42737500 | 2.31151100  |
| H | 4.63831800  | -0.41742800 | 2.15783800  |
| C | 3.39889700  | -1.40876900 | 3.58498100  |
| H | 3.04059900  | -2.40881000 | 3.85348300  |
| H | 4.00007700  | -1.04079600 | 4.42418100  |
| H | 2.52216900  | -0.76429900 | 3.47014000  |
| C | 5.45832200  | -2.35850400 | 2.49852800  |
| H | 6.04752700  | -2.05178600 | 3.36988800  |
| H | 5.12837600  | -3.39207400 | 2.65566100  |
| H | 6.11444100  | -2.34508300 | 1.62293800  |

|    |             |            |             |
|----|-------------|------------|-------------|
| Zn | -2.61862300 | 3.53037300 | -0.28250600 |
| Cl | -3.02688100 | 2.73223800 | 1.73752000  |
| Cl | -2.49267200 | 5.48626700 | -1.26824300 |

### 3-Int3-b

Zero-point correction= 1.043305 (Hartree/Particle)

Thermal correction to Energy= 1.108795

Thermal correction to Enthalpy= 1.109739

Thermal correction to Gibbs Free Energy= 0.938941

Sum of electronic and zero-point Energies= -3923.615554

Sum of electronic and thermal Energies=-3923.550064

Sum of electronic and thermal Enthalpies=-3923.549119

Sum of electronic and thermal Free Energies=-3923.719918

HF(ωb97xd/6-311+G(d,p)/LanL2dz, SMD[toluene])=-3924.658858

|   |             |             |             |
|---|-------------|-------------|-------------|
| N | 2.62685000  | 2.59297700  | -1.20345000 |
| C | 2.36873500  | 1.29415400  | -0.60922400 |
| H | 1.99011200  | 1.34958500  | 0.41566500  |
| H | 1.58977200  | 0.80511400  | -1.20941000 |
| C | 3.54848600  | 0.35783000  | -0.64049600 |
| C | 1.57477800  | 3.09928700  | -2.10731400 |
| H | 1.81361700  | 4.14391300  | -2.32161100 |
| H | 0.59767600  | 3.05224500  | -1.60637000 |
| C | 1.56136300  | 2.29027900  | -3.39180800 |
| C | 0.77836900  | 1.23616700  | -3.47488400 |
| C | -0.12021000 | 0.29368700  | -3.27653300 |
| C | -0.02525100 | -1.01078300 | -2.56352300 |
| C | -1.59619100 | 0.45154800  | -3.32300200 |
| H | 0.83216600  | -1.17339600 | -1.90444500 |
| H | -0.22372200 | -1.88116400 | -3.19600300 |
| H | -2.09369200 | -0.21289300 | -4.03752200 |
| H | -1.99002400 | 1.46663400  | -3.36894400 |
| S | 3.36150900  | 3.67456100  | -0.16174300 |
| O | 4.41182500  | 2.90518300  | 0.49187900  |
| O | 3.64219800  | 4.87718100  | -0.92344300 |
| C | 2.12849200  | 4.06207800  | 1.06357700  |
| C | 1.19176900  | 5.05800800  | 0.79799000  |
| C | 2.07372300  | 3.32496800  | 2.24569700  |
| C | 0.18677100  | 5.30817000  | 1.72667000  |
| H | 1.26474400  | 5.64408100  | -0.11221300 |
| C | 1.06294500  | 3.58902800  | 3.16096700  |
| H | 2.82478700  | 2.56853700  | 2.44900300  |
| C | 0.10300300  | 4.57559900  | 2.91441500  |
| H | -0.54140900 | 6.08954600  | 1.52631600  |
| H | 1.01773800  | 3.01577000  | 4.08292900  |
| C | -1.00777600 | 4.81493600  | 3.90342100  |
| H | -1.59564000 | 5.69956200  | 3.64276800  |

|    |             |             |             |    |             |             |             |
|----|-------------|-------------|-------------|----|-------------|-------------|-------------|
| H  | -1.68770800 | 3.95519800  | 3.93139100  | H  | -6.00359600 | -0.45191500 | 3.86146800  |
| H  | -0.61332300 | 4.95386400  | 4.91528900  | O  | 3.62307600  | -0.47259600 | 0.26924200  |
| C  | 4.49517600  | 0.42450200  | -1.78595200 | H  | -4.72053400 | -2.54548100 | 4.31289100  |
| H  | 3.93105700  | 0.57395100  | -2.71305300 | C  | -1.88042400 | -2.00285800 | 0.73132600  |
| H  | 5.12478400  | 1.31096900  | -1.64875200 | C  | -2.08269000 | -2.90901100 | -0.34159400 |
| H  | 5.12206200  | -0.46782300 | -1.83604400 | C  | -0.57789300 | -1.87631800 | 1.29408200  |
| C  | 2.52071600  | 2.74515900  | -4.46500100 | C  | -0.98757200 | -3.62787600 | -0.84270800 |
| H  | 2.24941400  | 3.74007800  | -4.84080100 | C  | 0.47206400  | -2.59863200 | 0.73882900  |
| H  | 3.53848200  | 2.82467600  | -4.06090800 | C  | 0.28914300  | -3.48930100 | -0.32316000 |
| H  | 2.52999600  | 2.04834800  | -5.30627900 | H  | -1.15330100 | -4.33820000 | -1.64878500 |
| Pd | -1.75001800 | -0.52955600 | -1.49705800 | H  | 1.45512200  | -2.51442500 | 1.19571700  |
| P  | -3.47612800 | 0.62337300  | -0.30685100 | C  | 1.44522500  | -4.32411800 | -0.84426600 |
| C  | -5.15255800 | 0.89823900  | -1.16274600 | H  | 1.05774200  | -4.95915400 | -1.65136100 |
| C  | -2.74879000 | 2.26751100  | 0.30382600  | C  | 2.55437000  | -3.44837600 | -1.44032800 |
| C  | -1.34905600 | 1.91100300  | 0.82402300  | H  | 2.22319300  | -2.93720000 | -2.34929800 |
| H  | -1.41100000 | 1.25164700  | 1.69352500  | H  | 2.83553200  | -2.66185600 | -0.72735900 |
| H  | -0.75117400 | 1.40979900  | 0.05348100  | H  | 3.44796200  | -4.03525600 | -1.67625600 |
| H  | -0.82536100 | 2.82297600  | 1.13068900  | C  | 1.99920600  | -5.24477200 | 0.25280300  |
| C  | -2.58268200 | 3.23649300  | -0.87586100 | H  | 1.20722900  | -5.87486100 | 0.67052100  |
| H  | -2.00396500 | 4.10608900  | -0.53829600 | H  | 2.77961400  | -5.89702000 | -0.15413400 |
| H  | -2.03268200 | 2.77180000  | -1.69985400 | H  | 2.43877000  | -4.66994800 | 1.07571400  |
| H  | -3.53853900 | 3.60739500  | -1.25800900 | C  | -0.32156100 | -1.11502200 | 2.59101000  |
| C  | -3.50572600 | 2.95964700  | 1.44556000  | H  | -1.21908500 | -0.53655800 | 2.83395100  |
| H  | -2.96756700 | 3.87860600  | 1.71284900  | C  | -0.07988700 | -2.10311700 | 3.74505900  |
| H  | -4.52581300 | 3.24428800  | 1.17813600  | H  | 0.83513700  | -2.67982000 | 3.57257800  |
| H  | -3.54499500 | 2.33015600  | 2.33988900  | H  | 0.03816900  | -1.55970000 | 4.68918200  |
| C  | -4.85194400 | 1.20667500  | -2.64158300 | H  | -0.91016100 | -2.80591900 | 3.86028200  |
| H  | -5.79924100 | 1.33632200  | -3.17991400 | C  | 0.85749300  | -0.14098600 | 2.50455800  |
| H  | -4.26949400 | 2.12317500  | -2.77026100 | H  | 0.70457600  | 0.58954400  | 1.70889900  |
| H  | -4.29923300 | 0.38878100  | -3.11054600 | H  | 0.95468200  | 0.40602000  | 3.44947600  |
| C  | -6.04315700 | 2.02115700  | -0.61125300 | H  | 1.80519000  | -0.65733200 | 2.32531500  |
| H  | -5.57254100 | 3.00392700  | -0.70010200 | C  | -3.48405300 | -3.29409400 | -0.80014300 |
| H  | -6.96962000 | 2.05310200  | -1.19837100 | H  | -4.17971000 | -2.55101500 | -0.40287200 |
| H  | -6.33206300 | 1.86869200  | 0.43161200  | C  | -3.64984700 | -3.31643100 | -2.32318000 |
| C  | -5.92975000 | -0.42772900 | -1.11977400 | H  | -3.02993000 | -4.08958700 | -2.79044200 |
| H  | -5.35169900 | -1.23976000 | -1.57077000 | H  | -4.69269700 | -3.53155800 | -2.58324400 |
| H  | -6.20654800 | -0.72155100 | -0.10319700 | H  | -3.37112800 | -2.35162300 | -2.76115300 |
| H  | -6.85203100 | -0.31794500 | -1.70354000 | C  | -3.87270500 | -4.64747600 | -0.18611100 |
| C  | -3.81947300 | -0.33145800 | 1.23329500  | H  | -4.89816100 | -4.91409600 | -0.46531600 |
| C  | -3.06782600 | -1.49160200 | 1.51300400  | H  | -3.20606400 | -5.44324100 | -0.53762900 |
| C  | -4.86201100 | 0.01915400  | 2.10400200  | H  | -3.81457600 | -4.61631200 | 0.90676300  |
| C  | -3.42721400 | -2.27170500 | 2.62156100  | Zn | 4.71965800  | -2.13008400 | 0.78880800  |
| C  | -5.18893300 | -0.75294000 | 3.21007500  | Cl | 6.31946100  | -2.66548500 | -0.62471700 |
| H  | -5.43733100 | 0.91665100  | 1.91101000  | Cl | 3.89243100  | -2.78558900 | 2.72644200  |
| C  | -4.47122800 | -1.91688200 | 3.46353000  |    |             |             |             |
| H  | -2.86449400 | -3.17938400 | 2.81721600  |    |             |             |             |

3-Ts3-b

S250

|                                                             |             |             |             |    |             |             |             |
|-------------------------------------------------------------|-------------|-------------|-------------|----|-------------|-------------|-------------|
| Zero-point correction= 1.044232 (Hartree/Particle)          |             |             |             | H  | -2.48104200 | -1.09585000 | 4.90255500  |
| Thermal correction to Energy= 1.108023                      |             |             |             | Pd | 1.31109900  | 0.14721100  | 1.06769400  |
| Thermal correction to Enthalpy= 1.108967                    |             |             |             | P  | 3.44816000  | -0.25473400 | 0.04190400  |
| Thermal correction to Gibbs Free Energy= 0.946707           |             |             |             | C  | 3.70856600  | -1.69336200 | -1.17326200 |
| Sum of electronic and zero-point Energies= -3923.585970     |             |             |             | C  | 4.70677700  | -0.37510600 | 1.47309400  |
| Sum of electronic and thermal Energies=-3923.522179         |             |             |             | C  | 4.17540200  | 0.48317600  | 2.64004700  |
| Sum of electronic and thermal Enthalpies= -3923.521235      |             |             |             | H  | 3.87942500  | 1.48909100  | 2.34105100  |
| Sum of electronic and thermal Free Energies= -3923.683495   |             |             |             | H  | 3.30489500  | 0.01649000  | 3.10659300  |
| HF(ωb97xd/6-311+G(d,p)/LanL2dz, SMD[toluene])= -3925.337988 |             |             |             | H  | 4.96118400  | 0.57613100  | 3.40048000  |
| N                                                           | -4.03004900 | -1.46875000 | 0.50391700  | C  | 4.77211600  | -1.81831900 | 2.00150900  |
| C                                                           | -2.74042800 | -1.37197000 | -0.14910100 | H  | 5.34224800  | -1.81836000 | 2.93872300  |
| H                                                           | -2.89981900 | -1.52530700 | -1.22323100 | H  | 3.77653600  | -2.21575600 | 2.22337200  |
| H                                                           | -2.24221900 | -0.40566300 | -0.01308800 | H  | 5.27723400  | -2.50397700 | 1.31734900  |
| C                                                           | -1.80580600 | -2.48940300 | 0.25528400  | C  | 6.12017400  | 0.10185900  | 1.11188100  |
| C                                                           | -4.20920500 | -1.11654100 | 1.91601300  | H  | 6.77229900  | -0.02277400 | 1.98523500  |
| H                                                           | -5.00922900 | -1.75179900 | 2.30681800  | H  | 6.56097600  | -0.47406000 | 0.29289300  |
| H                                                           | -4.56416300 | -0.07481600 | 2.00938000  | H  | 6.13611100  | 1.16020600  | 0.83460800  |
| C                                                           | -2.98389400 | -1.23174000 | 2.80871300  | C  | 3.00294900  | -2.90937900 | -0.55278300 |
| C                                                           | -1.72576200 | -1.27809400 | 2.40796200  | H  | 2.91717400  | -3.69307900 | -1.31648900 |
| C                                                           | -0.45350800 | -0.88713600 | 2.57786900  | H  | 3.51999400  | -3.34804300 | 0.30064800  |
| C                                                           | -0.06685700 | 0.53157100  | 2.57652100  | H  | 2.01419200  | -2.59176900 | -0.19587300 |
| C                                                           | 0.84048900  | -1.52682100 | 2.26910900  | C  | 5.14753300  | -2.08609800 | -1.53828100 |
| S                                                           | -5.37196200 | -1.31039600 | -0.47017100 | H  | 5.76754900  | -2.30819800 | -0.66694200 |
| O                                                           | -5.09010100 | -2.04057900 | -1.69419300 | H  | 5.11305000  | -2.99456900 | -2.15208500 |
| O                                                           | -6.52238900 | -1.61243100 | 0.36296500  | H  | 5.64687100  | -1.32054700 | -2.13696500 |
| C                                                           | -5.44446200 | 0.41970100  | -0.89309800 | C  | 2.94958500  | -1.34564200 | -2.46385200 |
| C                                                           | -6.26252500 | 1.27551200  | -0.16161700 | H  | 1.88744100  | -1.18096600 | -2.26553100 |
| C                                                           | -4.65030100 | 0.90531000  | -1.93106200 | H  | 3.36123000  | -0.46256700 | -2.96235800 |
| C                                                           | -6.28337500 | 2.62928100  | -0.47850500 | H  | 3.01345200  | -2.19199200 | -3.15701300 |
| H                                                           | -6.88768500 | 0.87521600  | 0.62943300  | C  | 3.87656400  | 1.27010200  | -0.91956400 |
| C                                                           | -4.67488000 | 2.26315100  | -2.22660500 | C  | 2.96474600  | 2.34269200  | -1.00720100 |
| H                                                           | -4.04534000 | 0.22390700  | -2.52059600 | C  | 5.07286800  | 1.36117800  | -1.64646600 |
| C                                                           | -5.49557700 | 3.14256800  | -1.51213000 | C  | 3.26166000  | 3.42060800  | -1.85173400 |
| H                                                           | -6.92892100 | 3.29854000  | 0.08413900  | C  | 5.36068600  | 2.44357300  | -2.46710100 |
| H                                                           | -4.06130200 | 2.64257300  | -3.03971800 | H  | 5.80464700  | 0.56819200  | -1.56992800 |
| C                                                           | -5.56540900 | 4.60306500  | -1.87622300 | C  | 4.43868300  | 3.47733400  | -2.58368900 |
| H                                                           | -5.67296700 | 5.23083600  | -0.98649100 | H  | 2.54912300  | 4.23869200  | -1.91178800 |
| H                                                           | -4.66921900 | 4.92636100  | -2.41373000 | H  | 6.29675300  | 2.47231900  | -3.01604900 |
| H                                                           | -6.42891200 | 4.79569000  | -2.52374700 | O  | -0.65443900 | -2.46182000 | -0.23220400 |
| C                                                           | -2.35641200 | -3.77685300 | 0.80014000  | H  | 0.61588400  | 0.80919900  | 3.38702400  |
| H                                                           | -1.59375100 | -4.29602200 | 1.38616700  | H  | -0.83347900 | 1.27459600  | 2.38086800  |
| H                                                           | -3.25770100 | -3.63873800 | 1.39215200  | H  | 1.55794300  | -1.46990700 | 3.09115300  |
| H                                                           | -2.61982300 | -4.40227400 | -0.06659800 | H  | 0.83861900  | -2.50427500 | 1.78952700  |
| C                                                           | -3.36628800 | -1.21751000 | 4.27482800  | H  | 4.63857500  | 4.32688800  | -3.22946000 |
| H                                                           | -4.06522300 | -0.39697700 | 4.48711600  | C  | 1.66356600  | 2.47079000  | -0.25850600 |
| H                                                           | -3.87075900 | -2.14971000 | 4.56071100  | C  | 0.47337900  | 1.99484000  | -0.88277900 |

|   |             |            |             |    |             |             |             |
|---|-------------|------------|-------------|----|-------------|-------------|-------------|
| C | 1.55651000  | 3.34296000 | 0.85576400  | H  | 3.18076200  | 6.25783300  | 1.79787700  |
| C | -0.77108600 | 2.34296900 | -0.35611600 | H  | 2.51496100  | 5.87068300  | 0.20219500  |
| C | 0.27847100  | 3.61685300 | 1.35700900  | C  | 4.15667400  | 3.88637700  | 1.22057700  |
| C | -0.89086700 | 3.14849400 | 0.77053000  | H  | 4.42159800  | 2.83203900  | 1.19628200  |
| H | -1.66756800 | 1.99916400 | -0.86529600 | H  | 4.45498900  | 4.31597100  | 0.26115400  |
| H | 0.19427300  | 4.25141900 | 2.23717600  | H  | 4.76122700  | 4.36470400  | 1.99913900  |
| C | -2.24872800 | 3.56209900 | 1.30883100  | C  | 0.51593200  | 1.30615800  | -2.24005600 |
| H | -2.09170100 | 3.96761000 | 2.31694700  | C  | -0.41345500 | 0.09596500  | -2.34457700 |
| C | -3.23446900 | 2.39367700 | 1.42078200  | H  | -0.24535200 | -0.43093400 | -3.29004800 |
| H | -3.47416800 | 1.97675800 | 0.43709900  | H  | -0.24896500 | -0.61226600 | -1.52791700 |
| H | -2.83675900 | 1.58542400 | 2.04257900  | H  | -1.46859100 | 0.39690000  | -2.32493300 |
| H | -4.17657300 | 2.73511300 | 1.86295000  | C  | 0.19374500  | 2.32655300  | -3.34335900 |
| C | -2.83201800 | 4.68206900 | 0.43517300  | H  | -0.82010700 | 2.72558700  | -3.21722400 |
| H | -3.80259300 | 5.01228200 | 0.82289700  | H  | 0.89247600  | 3.16884900  | -3.33105900 |
| H | -2.16025400 | 5.54602200 | 0.39815500  | H  | 0.25200700  | 1.84992900  | -4.32790700 |
| H | -2.98175700 | 4.32369100 | -0.58949200 | H  | 1.53573900  | 0.95713600  | -2.41031300 |
| C | 2.67708400  | 4.15500600 | 1.53203700  | Zn | 0.41117900  | -4.10732000 | -0.79160300 |
| H | 2.54358900  | 3.98006200 | 2.60858300  | Cl | 0.36416400  | -4.21139400 | -3.00092100 |
| C | 2.42982600  | 5.65614400 | 1.27406700  | Cl | 0.99328500  | -5.42841500 | 0.89767900  |
| H | 1.44107000  | 5.98500600 | 1.60390300  |    |             |             |             |

## 11. X-Ray structures

### (a) Product 3a

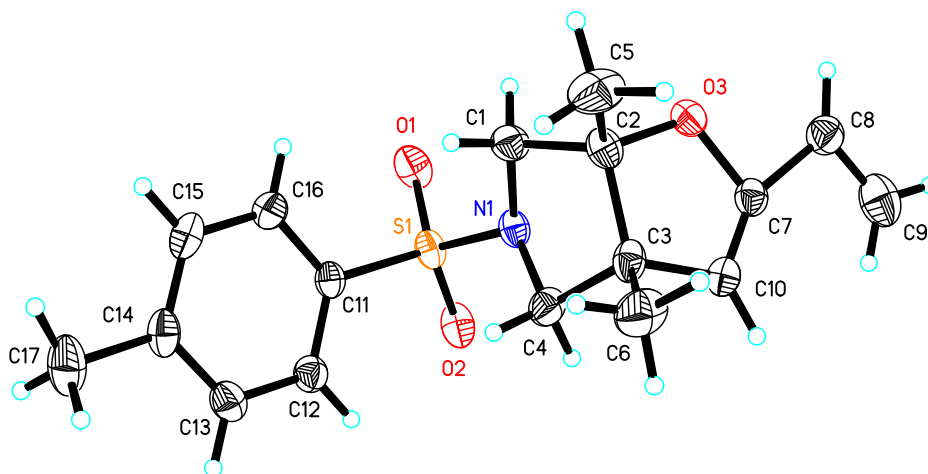

The crystal data of **3a** have been deposited in CCDC with number 2206931. Empirical Formula:  $C_{17}H_{21}NO_3S$ ; Formula Weight: 319.41; Crystal Color, Habit: colorless; Crystal Dimensions: 0.180 x 0.150 x 0.110 mm<sup>3</sup>; Crystal System: Monoclinic; Lattice Parameters:  $a = 10.3144(3)$  Å,  $\alpha = 90$  deg.  $b = 12.2204(4)$  Å,  $\beta = 92.9460(10)$  deg.  $c = 13.0932(4)$  Å,  $\gamma = 90$  deg.;  $V = 1648.17(9)$  Å<sup>3</sup>; Space group: P 21/c;  $Z = 4$ ;  $D_{calc} = 1.287$  g/cm<sup>3</sup>;  $F_{000} = 680$ ; Diffractometer: Rigaku AFC7R; Residuals: R;  $R_w$ : 0.0479, 0.1211.

**(b) Product 14**

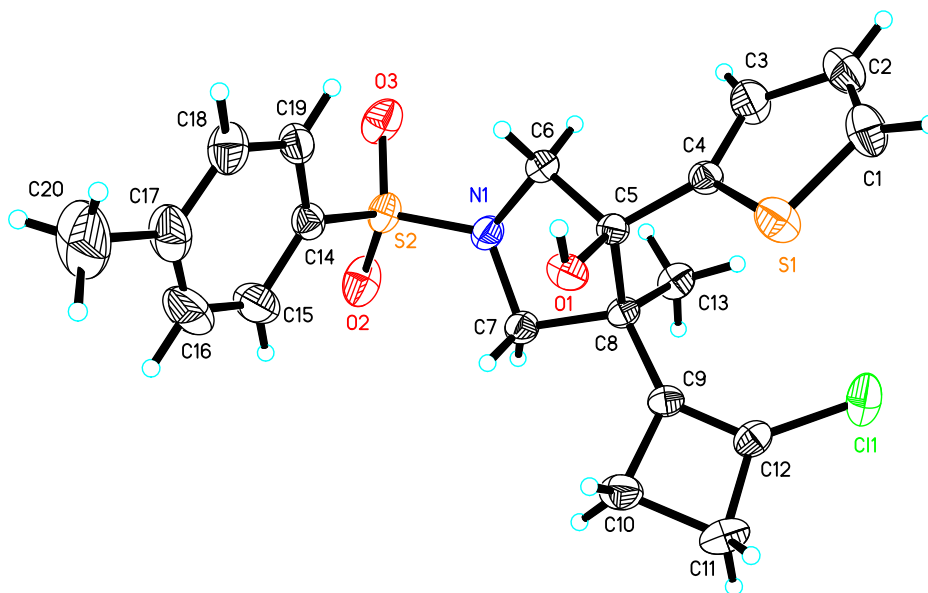

The crystal data of **14** have been deposited in CCDC with number 2246469. Empirical Formula:  $C_{20}H_{22}ClNO_3S_2$ ; Formula Weight: 423.95; Crystal Color, Habit: colorless; Crystal Dimensions: 0.200 x 0.150 x 0.120 mm<sup>3</sup>; Crystal System: Monoclinic; Lattice Parameters:  $a = 19.7752(8)$  Å,  $\alpha = 90$  deg.  $b = 9.1254(3)$  Å,  $\beta = 96.4770(10)$  deg.  $c = 11.5285(4)$  Å,  $\gamma = 90$  deg.;  $V = 2067.12(13)$  Å<sup>3</sup>; Space group: P 21/c;  $Z = 4$ ;  $D_{calc} = 1.362$  g/cm<sup>3</sup>;  $F_{000} = 888$ ; Diffractometer: Rigaku AFC7R; Residuals:  $R$ ;  $R_w$ : 0.0429, 0.1105.

## 12. References

- [1] S. Yang, K. H. Rui, X. Y. Tang, Q. Xu, M. Shi, *J. Am. Chem. Soc.*, **2017**, *16*, 5957-5964.
- [2] S. Yang, Q.-Z. Li, C. Xu, Q. Xu, M. Shi, *Chem. Sci.* **2018**, *9*, 5074–5081.
- [3] C. Xu, C. Ning, S. Yang, Y. Wei, M. Shi, *Adv. Synth. Catal.* 2021, **363**, 1727–1732.
- [4] Gaussian 16, Revision A.03, Frisch, M. J.; Trucks, G. W.; Schlegel, H. B.; Scuseria, G. E.; Robb, M. A.; Cheeseman, J. R.; Scalmani, G.; Barone, V.; Petersson, G. A.; Nakatsuji, H.; Li, X.; Caricato, M.; Marenich, A. V.; Bloino, J.; Janesko, B. G.; Gomperts, R.; Mennucci, B.; Hratchian, H. P.; Ortiz, J. V.; Izmaylov, A. F.; Sonnenberg, J. L.; Williams-Young, D.; Ding, F.; Lipparini, F.; Egidi, F.; Goings, J.; Peng, B.; Petrone, A.; Henderson, T.; Ranasinghe, D.; Zakrzewski, V. G.; Gao, J.; Rega, N.; Zheng, G.; Liang, W.; Hada, M.; Ehara, M.; Toyota, K.; Fukuda, R.; Hasegawa, J.; Ishida, M.; Nakajima, T.; Honda, Y.; Kitao, O.; Nakai, H.; Vreven, T.; Throssell, K.; Montgomery, J. A.; Jr., Peralta, J. E.; Ogliaro, F.; Bearpark, M. J.; Heyd, J. J.; Brothers, E. N.; Kudin, K. N.; Staroverov, V. N.; Keith, T. A.; Kobayashi, R.; Normand, J.; Raghavachari, K.; Rendell, A. P.; Burant, J. C.; Iyengar, S. S.; Tomasi, J.; Cossi, M.; Millam, J. M.; Klene, M.; Adamo, C.; Cammi, R.; Ochterski, J. W.; Martin, R. L.; Morokuma, K.; Farkas, O.; Foresman, J. B.; and Fox, D. J. Gaussian, Inc., Wallingford CT, 2016.
